# Supplementary material for: Identification of Novel Interaction Partners of Ets-1: Focus on DNA Repair
Source: MDPI journal article supplement (doi:10.3390/genes10030206), 2019-03-08
Supplement: s1 [file s1]

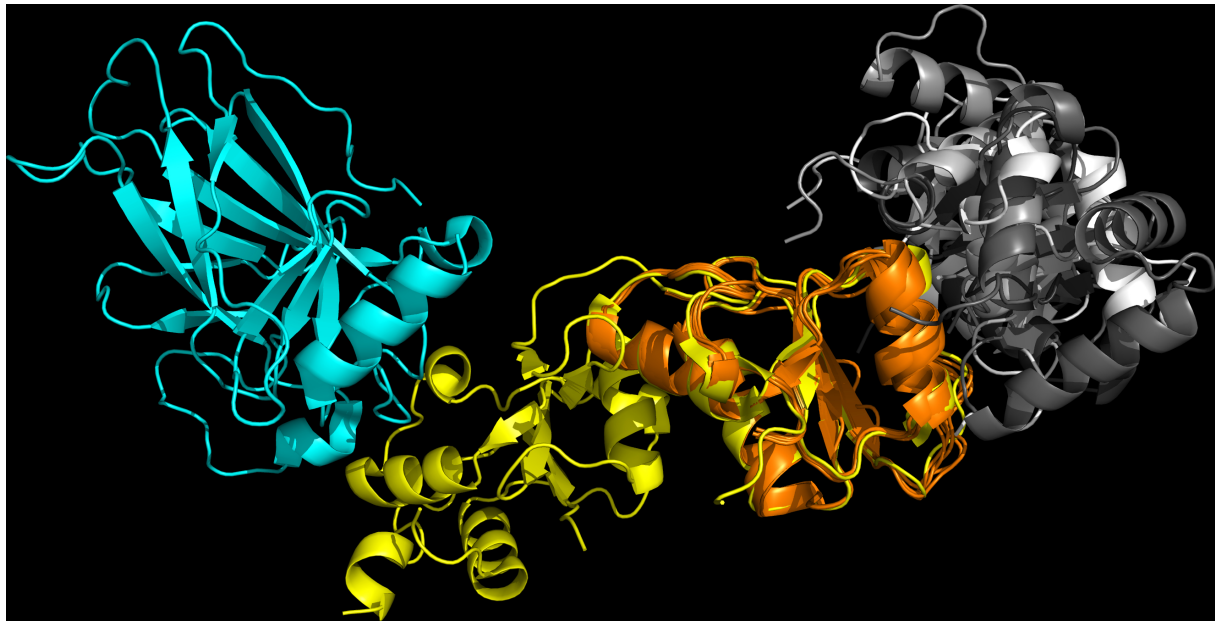

**Figure S1.** Structure of the two BRCT domains of TP53BP1 (yellow) bound to TP53 (PDB ID: 1KZY) (cyan) with the superposition of the five first docking poses of one BRCT domain of TP53BP1 (orange) vs the ETS domain of Ets-1 (5 shades of grey), in cartoon representation.
