# Supplementary material for: Identification of Novel Interaction Partners of Ets-1: Focus on DNA Repair
Source: Genes (Basel). 2019 Mar 8;10(3):206. doi: 10.3390/genes10030206 (PMC6470857; doi:10.3390/genes10030206)
Supplement: Supplementary file 1 [file genes-10-00206-s001.zip]

Archive with 5 entries (5 files):
- Supplementary_Figures.pdf
- Supplementary_Table_S1_List_of_homologs.xlsx
- Supplementary_Table_S2_ETS1_ETS_homologs.xlsx
- Supplementary_Table_S3_PARP1_BRCT_homologs.xlsx
- Supplementary_Table_S4_KU70_SAP_homologs.xlsx
