# Supplementary material for: Identification of Novel Interaction Partners of Ets-1: Focus on DNA Repair
Source: Genes (Basel). 2019 Mar 8;10(3):206. doi: 10.3390/genes10030206 (PMC6470857; doi:10.3390/genes10030206)
Supplement: Supplementary file 1 [file genes-10-00206-s001.zip › Supplementary_Table_S1_List_of_homologs.xlsx]

## Sheet: List_of_uniprot_IDs_Genes_symbo
UniProt Accession	Gene Symbol	DNA-repair
ETS homologs
P55265	ADAR
Q13616	CUL1
Q16254	E2F4
Q15329	E2F5
Q9NZC4	EHF
P32519	ELF1
Q15723	ELF2
P78545	ELF3
Q99607	ELF4
Q9UKW6	ELF5
P19419	ELK1
P41970	ELK3
P28324	ELK4
P50548	ERF
P11308	ERG
P14921	ETS1
P15036	ETS2
P50549	ETV1
O00321	ETV2
P41162	ETV3
Q6ZN32	ETV3L
P43268	ETV4
P41161	ETV5
P41212	ETV6
Q9Y603	ETV7
Q99581	FEV
Q01543	FLI1
Q06546	GABPA
Q92522	H1FX
Q00613	HSF1	x
P14316	IRF2
Q14653	IRF3
Q9H1D9	POLR3F
P15927	RPA2	x
Q96H20	SNF8
O95238	SPDEF
P17947	SPI1
Q01892	SPIB
Q8N5J4	SPIC
Q15554	TERF2	x
Q86VN1	VPS36
Q9H171	ZBP1
BRCT homologs
Q99728	BARD1	x
P38398	BRCA1	x
P04053	DNTT
Q9H8V3	ECT2
P49916	LIG3	x
P49917	LIG4	x
Q8NEM0	MCPH1
Q14676	MDC1	x
O60934	NBN	x
P09874	PARP1	x
Q6ZW49	PAXIP1	x
O00541	PES1
Q9UGP5	POLL	x
Q9NP87	POLM	x
Q9UBZ9	REV1	x
P35251	RFC1	x
Q92547	TOPBP1	x
Q12888	TP53BP1	x
P18887	XRCC1	x
SAP homologs
P35659	DEK	x
P50402	EMD
Q8IV48	ERI1
Q00839	HNRNPU
Q9BUJ2	HNRNPUL1
Q1KMD3	HNRNPUL2
O15525	MAFG
Q969V6	MKL1
Q9ULH7	MKL2
Q8IZQ8	MYOCD
O75925	PIAS1
O75928	PIAS2
Q9Y6X2	PIAS3
Q8N2W9	PIAS4	x
Q99633	PRPF18
Q8WZ73	RFFL
P82979	SARNP
P42166	TMPO
P12956	XRCC6	x

## Sheet: Full_list
Uniprot – Full list of homologs	Gene Symbol
P55265	ADAR
Q13616	CUL1
Q16254	E2F4
Q15329	E2F5
Q9NZC4	EHF
P32519	ELF1
Q15723	ELF2
P78545	ELF3
Q99607	ELF4
Q9UKW6	ELF5
P19419	ELK1
P41970	ELK3
P28324	ELK4
P50548	ERF
P11308	ERG
P14921	ETS1
P15036	ETS2
P50549	ETV1
O00321	ETV2
P41162	ETV3
Q6ZN32	ETV3L
P43268	ETV4
P41161	ETV5
P41212	ETV6
Q9Y603	ETV7
Q99581	FEV
Q01543	FLI1
Q06546	GABPA
Q92522	H1FX
Q00613	HSF1
P14316	IRF2
Q14653	IRF3
Q9H1D9	POLR3F
P15927	RPA2
Q96H20	SNF8
O95238	SPDEF
P17947	SPI1
Q01892	SPIB
Q8N5J4	SPIC
Q15554	TERF2
Q86VN1	VPS36
Q9H171	ZBP1
Q99728	BARD1
P38398	BRCA1
P04053	DNTT
Q9H8V3	ECT2
P49916	LIG3
P49917	LIG4
Q8NEM0	MCPH1
Q14676	MDC1
O60934	NBN
P09874	PARP1
Q6ZW49	PAXIP1
O00541	PES1
Q9UGP5	POLL
Q9NP87	POLM
Q9UBZ9	REV1
P35251	RFC1
Q92547	TOPBP1
Q12888	TP53BP1
P18887	XRCC1
P35659	DEK
P50402	EMD
Q8IV48	ERI1
Q00839	HNRNPU
Q9BUJ2	HNRNPUL1
Q1KMD3	HNRNPUL2
O15525	MAFG
Q969V6	MKL1
Q9ULH7	MKL2
Q8IZQ8	MYOCD
O75925	PIAS1
O75928	PIAS2
Q9Y6X2	PIAS3
Q8N2W9	PIAS4
Q99633	PRPF18
Q8WZ73	RFFL
P82979	SARNP
P42166	TMPO
P12956	XRCC6

## Sheet: DNA-repair_list
Uniprot – List of homologs involved in DNA-repair	Gene Symbol
Q00613	HSF1
P15927	RPA2
Q15554	TERF2
Q99728	BARD1
P38398	BRCA1
P49916	LIG3
P49917	LIG4
Q14676	MDC1
O60934	NBN
P09874	PARP1
Q6ZW49	PAXIP1
Q9UGP5	POLL
Q9NP87	POLM
Q9UBZ9	REV1
P35251	RFC1
Q92547	TOPBP1
Q12888	TP53BP1
P18887	XRCC1
P35659	DEK
Q8N2W9	PIAS4
P12956	XRCC6
