# Supplementary material for: Identification of Novel Interaction Partners of Ets-1: Focus on DNA Repair
Source: Genes (Basel). 2019 Mar 8;10(3):206. doi: 10.3390/genes10030206 (PMC6470857; doi:10.3390/genes10030206)
Supplement: Supplementary file 1 [file genes-10-00206-s001.zip › Supplementary_Table_S2_ETS1_ETS_homologs.xlsx]

## Sheet: results_ETS1_ETS__all_BLASTs_in
PDB	chain	uniprot	subject ids	% identity	% positives	alignment length	mismatches	gap opens	q. start	q. end	s. start	s. end	evalue	bit score	Z	rmsd	lali	nres	%id	PDB Description	refseq+version	refseq	% identity	% positives	alignment length	mismatches	gap opens	q. start	q. end	s. start	s. end	evalue	bit score	interpro	contains_IPR000418	gene_symbol	taxon_ID	filter	group_ID	structure	Rank_CATH	K-Score_CATH	G-Score_CATH	J-Score_CATH	H-Score_CATH	T-Score_CATH	RMSD_CATH	N/*_CATH	P/$_CATH
-	-	-	-	-	-	-	-	-	-	-	-	-	-	-	-	-	-	-	-	-	NP_689536.1	NP_689536	34.29	57.14	70	42	2	1	66	107	176	0.025	40.4	IPR011991; IPR000418	Y	SPIC	9606 [Organism: human] [Scientific Name: Homo sapiens]	Y	24	-	-	-	-	-	-	-	-	-	-
-	-	-	-	-	-	-	-	-	-	-	-	-	-	-	-	-	-	-	-	-	NP_689536.1	NP_689536	34.29	57.14	70	42	2	1	66	107	176	0.025	40.4	IPR011991; IPR000418	Y	SPIC	9606 [Organism: human] [Scientific Name: Homo sapiens]	Y	24	-	-	-	-	-	-	-	-	-	-
-	-	-	-	-	-	-	-	-	-	-	-	-	-	-	-	-	-	-	-	-	NP_003112.2	NP_003112	35.71	57.14	84	49	3	5	84	169	251	3e-06	51.6	IPR000418; IPR011991	Y	SPIB	9606 [Organism: human] [Scientific Name: Homo sapiens]	Y	12	-	-	-	-	-	-	-	-	-	-
-	-	-	-	-	-	-	-	-	-	-	-	-	-	-	-	-	-	-	-	-	NP_003112.2	NP_003112	35.71	57.14	84	49	3	5	84	169	251	3e-06	51.6	IPR000418; IPR011991	Y	SPIB	9606 [Organism: human] [Scientific Name: Homo sapiens]	Y	12	-	-	-	-	-	-	-	-	-	-
-	-	-	-	-	-	-	-	-	-	-	-	-	-	-	-	-	-	-	-	-	NP_001230927.1	NP_001230927	35.71	57.14	84	49	3	5	84	78	160	1e-05	48.9	IPR000418; IPR011991	Y	SPIB	9606 [Organism: human] [Scientific Name: Homo sapiens]	Y	12	-	-	-	-	-	-	-	-	-	-
-	-	-	-	-	-	-	-	-	-	-	-	-	-	-	-	-	-	-	-	-	NP_001230927.1	NP_001230927	35.71	57.14	84	49	3	5	84	78	160	1e-05	48.9	IPR000418; IPR011991	Y	SPIB	9606 [Organism: human] [Scientific Name: Homo sapiens]	Y	12	-	-	-	-	-	-	-	-	-	-
-	-	-	-	-	-	-	-	-	-	-	-	-	-	-	-	-	-	-	-	-	NP_001230929.1	NP_001230929	35.71	57.14	84	49	3	5	84	138	220	5e-05	48.1	IPR000418; IPR011991	Y	SPIB	9606 [Organism: human] [Scientific Name: Homo sapiens]	Y	12	-	-	-	-	-	-	-	-	-	-
-	-	-	-	-	-	-	-	-	-	-	-	-	-	-	-	-	-	-	-	-	NP_001230929.1	NP_001230929	35.71	57.14	84	49	3	5	84	138	220	5e-05	48.1	IPR000418; IPR011991	Y	SPIB	9606 [Organism: human] [Scientific Name: Homo sapiens]	Y	12	-	-	-	-	-	-	-	-	-	-
-	-	-	-	-	-	-	-	-	-	-	-	-	-	-	-	-	-	-	-	-	NP_003111.2	NP_003111	34.52	53.57	84	50	3	5	84	170	252	0.003	43.1	IPR000418; IPR011991	Y	SPI1	9606 [Organism: human] [Scientific Name: Homo sapiens]	Y	10	-	-	-	-	-	-	-	-	-	-
-	-	-	-	-	-	-	-	-	-	-	-	-	-	-	-	-	-	-	-	-	NP_003111.2	NP_003111	34.52	53.57	84	50	3	5	84	170	252	0.003	43.1	IPR000418; IPR011991	Y	SPI1	9606 [Organism: human] [Scientific Name: Homo sapiens]	Y	10	-	-	-	-	-	-	-	-	-	-
-	-	-	-	-	-	-	-	-	-	-	-	-	-	-	-	-	-	-	-	-	NP_001074016.1	NP_001074016	34.52	53.57	84	50	3	5	84	171	253	0.003	43.1	IPR000418; IPR011991	Y	SPI1	9606 [Organism: human] [Scientific Name: Homo sapiens]	Y	10	-	-	-	-	-	-	-	-	-	-
-	-	-	-	-	-	-	-	-	-	-	-	-	-	-	-	-	-	-	-	-	NP_001074016.1	NP_001074016	34.52	53.57	84	50	3	5	84	171	253	0.003	43.1	IPR000418; IPR011991	Y	SPI1	9606 [Organism: human] [Scientific Name: Homo sapiens]	Y	10	-	-	-	-	-	-	-	-	-	-
2DAO	A	P41212	gi|159164053|pdb|2DAO|A	43.53	64.71	85	47	1	2	85	6	90	8e-19	76.6	11.9	1.8	84	118	44	MOLECULE: TRANSCRIPTION FACTOR ETV6;	NP_001978.1	NP_001978	43.75	66.25	80	44	1	7	85	341	420	6e-16	80.5	IPR013761; IPR011991; IPR000418; IPR003118	Y	ETV6	9606 [Organism: human] [Scientific Name: Homo sapiens]	Y	18	2DAO-A	-	-	-	-	-	-	-	-	-
2DAO	A	P41212	gi|159164053|pdb|2DAO|A	43.53	64.71	85	47	1	2	85	6	90	8e-19	76.6	11.9	1.8	84	118	44	MOLECULE: TRANSCRIPTION FACTOR ETV6;	NP_001978.1	NP_001978	43.75	66.25	80	44	1	7	85	341	420	6e-16	80.5	IPR013761; IPR011991; IPR000418; IPR003118	Y	ETV6	9606 [Organism: human] [Scientific Name: Homo sapiens]	Y	18	2DAO-A	-	-	-	-	-	-	-	-	-
2DAO	A	P41212	gi|159164053|pdb|2DAO|A	43.53	64.71	85	47	1	2	85	6	90	8e-19	76.6	11.9	1.8	84	118	44	MOLECULE: TRANSCRIPTION FACTOR ETV6;	NP_001978.1	NP_001978	43.75	66.25	80	44	1	7	85	341	420	6e-16	80.5	IPR013761; IPR011991; IPR000418; IPR003118	Y	ETV6	9606 [Organism: human] [Scientific Name: Homo sapiens]	Y	18	2DAO-A	-	-	-	-	-	-	-	-	-
2DAO	A	P41212	gi|159164053|pdb|2DAO|A	43.53	64.71	85	47	1	2	85	6	90	8e-19	76.6	11.9	1.8	84	118	44	MOLECULE: TRANSCRIPTION FACTOR ETV6;	NP_001978.1	NP_001978	43.75	66.25	80	44	1	7	85	341	420	6e-16	80.5	IPR013761; IPR011991; IPR000418; IPR003118	Y	ETV6	9606 [Organism: human] [Scientific Name: Homo sapiens]	Y	18	2DAO-A	-	-	-	-	-	-	-	-	-
2DAO	A	P41212	gi|159164053|pdb|2DAO|A	43.53	64.71	85	47	1	2	85	6	90	8e-19	76.6	11.9	1.8	84	118	44	MOLECULE: TRANSCRIPTION FACTOR ETV6;	NP_001978.1	NP_001978	43.75	66.25	80	44	1	7	85	341	420	6e-16	80.5	IPR013761; IPR011991; IPR000418; IPR003118	Y	ETV6	9606 [Organism: human] [Scientific Name: Homo sapiens]	Y	18	2DAO-A	-	-	-	-	-	-	-	-	-
-	-	-	-	-	-	-	-	-	-	-	-	-	-	-	-	-	-	-	-	-	NP_001193965.1	NP_001193965	42.5	63.75	80	45	1	7	85	171	250	2e-15	77	IPR000418; IPR013761; IPR003118; IPR011991	Y	ETV7	9606 [Organism: human] [Scientific Name: Homo sapiens]	Y	19	-	-	-	-	-	-	-	-	-	-
-	-	-	-	-	-	-	-	-	-	-	-	-	-	-	-	-	-	-	-	-	NP_001193965.1	NP_001193965	42.5	63.75	80	45	1	7	85	171	250	2e-15	77	IPR000418; IPR013761; IPR003118; IPR011991	Y	ETV7	9606 [Organism: human] [Scientific Name: Homo sapiens]	Y	19	-	-	-	-	-	-	-	-	-	-
-	-	-	-	-	-	-	-	-	-	-	-	-	-	-	-	-	-	-	-	-	NP_001193965.1	NP_001193965	42.5	63.75	80	45	1	7	85	171	250	2e-15	77	IPR000418; IPR013761; IPR003118; IPR011991	Y	ETV7	9606 [Organism: human] [Scientific Name: Homo sapiens]	Y	19	-	-	-	-	-	-	-	-	-	-
-	-	-	-	-	-	-	-	-	-	-	-	-	-	-	-	-	-	-	-	-	NP_001193965.1	NP_001193965	42.5	63.75	80	45	1	7	85	171	250	2e-15	77	IPR000418; IPR013761; IPR003118; IPR011991	Y	ETV7	9606 [Organism: human] [Scientific Name: Homo sapiens]	Y	19	-	-	-	-	-	-	-	-	-	-
-	-	-	-	-	-	-	-	-	-	-	-	-	-	-	-	-	-	-	-	-	NP_001193965.1	NP_001193965	42.5	63.75	80	45	1	7	85	171	250	2e-15	77	IPR000418; IPR013761; IPR003118; IPR011991	Y	ETV7	9606 [Organism: human] [Scientific Name: Homo sapiens]	Y	19	-	-	-	-	-	-	-	-	-	-
-	-	-	-	-	-	-	-	-	-	-	-	-	-	-	-	-	-	-	-	-	NP_057219.1	NP_057219	42.5	63.75	80	45	1	7	85	226	305	7e-15	76.3	IPR000418; IPR013761; IPR003118; IPR011991	Y	ETV7	9606 [Organism: human] [Scientific Name: Homo sapiens]	Y	19	-	-	-	-	-	-	-	-	-	-
-	-	-	-	-	-	-	-	-	-	-	-	-	-	-	-	-	-	-	-	-	NP_057219.1	NP_057219	42.5	63.75	80	45	1	7	85	226	305	7e-15	76.3	IPR000418; IPR013761; IPR003118; IPR011991	Y	ETV7	9606 [Organism: human] [Scientific Name: Homo sapiens]	Y	19	-	-	-	-	-	-	-	-	-	-
-	-	-	-	-	-	-	-	-	-	-	-	-	-	-	-	-	-	-	-	-	NP_057219.1	NP_057219	42.5	63.75	80	45	1	7	85	226	305	7e-15	76.3	IPR000418; IPR013761; IPR003118; IPR011991	Y	ETV7	9606 [Organism: human] [Scientific Name: Homo sapiens]	Y	19	-	-	-	-	-	-	-	-	-	-
-	-	-	-	-	-	-	-	-	-	-	-	-	-	-	-	-	-	-	-	-	NP_057219.1	NP_057219	42.5	63.75	80	45	1	7	85	226	305	7e-15	76.3	IPR000418; IPR013761; IPR003118; IPR011991	Y	ETV7	9606 [Organism: human] [Scientific Name: Homo sapiens]	Y	19	-	-	-	-	-	-	-	-	-	-
-	-	-	-	-	-	-	-	-	-	-	-	-	-	-	-	-	-	-	-	-	NP_057219.1	NP_057219	42.5	63.75	80	45	1	7	85	226	305	7e-15	76.3	IPR000418; IPR013761; IPR003118; IPR011991	Y	ETV7	9606 [Organism: human] [Scientific Name: Homo sapiens]	Y	19	-	-	-	-	-	-	-	-	-	-
-	-	-	-	-	-	-	-	-	-	-	-	-	-	-	-	-	-	-	-	-	NP_001193968.1	NP_001193968	42.31	62.82	78	44	1	7	83	171	248	2e-14	74.3	IPR000418; IPR013761; IPR003118; IPR011991	Y	ETV7	9606 [Organism: human] [Scientific Name: Homo sapiens]	Y	19	-	-	-	-	-	-	-	-	-	-
-	-	-	-	-	-	-	-	-	-	-	-	-	-	-	-	-	-	-	-	-	NP_001193968.1	NP_001193968	42.31	62.82	78	44	1	7	83	171	248	2e-14	74.3	IPR000418; IPR013761; IPR003118; IPR011991	Y	ETV7	9606 [Organism: human] [Scientific Name: Homo sapiens]	Y	19	-	-	-	-	-	-	-	-	-	-
-	-	-	-	-	-	-	-	-	-	-	-	-	-	-	-	-	-	-	-	-	NP_001193968.1	NP_001193968	42.31	62.82	78	44	1	7	83	171	248	2e-14	74.3	IPR000418; IPR013761; IPR003118; IPR011991	Y	ETV7	9606 [Organism: human] [Scientific Name: Homo sapiens]	Y	19	-	-	-	-	-	-	-	-	-	-
-	-	-	-	-	-	-	-	-	-	-	-	-	-	-	-	-	-	-	-	-	NP_001193968.1	NP_001193968	42.31	62.82	78	44	1	7	83	171	248	2e-14	74.3	IPR000418; IPR013761; IPR003118; IPR011991	Y	ETV7	9606 [Organism: human] [Scientific Name: Homo sapiens]	Y	19	-	-	-	-	-	-	-	-	-	-
-	-	-	-	-	-	-	-	-	-	-	-	-	-	-	-	-	-	-	-	-	NP_001193968.1	NP_001193968	42.31	62.82	78	44	1	7	83	171	248	2e-14	74.3	IPR000418; IPR013761; IPR003118; IPR011991	Y	ETV7	9606 [Organism: human] [Scientific Name: Homo sapiens]	Y	19	-	-	-	-	-	-	-	-	-	-
-	-	-	-	-	-	-	-	-	-	-	-	-	-	-	-	-	-	-	-	-	NP_001193970.1	NP_001193970	42.5	63.75	80	45	1	7	85	75	154	4e-14	72.8	IPR000418; IPR013761; IPR003118; IPR011991	Y	ETV7	9606 [Organism: human] [Scientific Name: Homo sapiens]	Y	19	-	-	-	-	-	-	-	-	-	-
-	-	-	-	-	-	-	-	-	-	-	-	-	-	-	-	-	-	-	-	-	NP_001193970.1	NP_001193970	42.5	63.75	80	45	1	7	85	75	154	4e-14	72.8	IPR000418; IPR013761; IPR003118; IPR011991	Y	ETV7	9606 [Organism: human] [Scientific Name: Homo sapiens]	Y	19	-	-	-	-	-	-	-	-	-	-
-	-	-	-	-	-	-	-	-	-	-	-	-	-	-	-	-	-	-	-	-	NP_001193970.1	NP_001193970	42.5	63.75	80	45	1	7	85	75	154	4e-14	72.8	IPR000418; IPR013761; IPR003118; IPR011991	Y	ETV7	9606 [Organism: human] [Scientific Name: Homo sapiens]	Y	19	-	-	-	-	-	-	-	-	-	-
-	-	-	-	-	-	-	-	-	-	-	-	-	-	-	-	-	-	-	-	-	NP_001193970.1	NP_001193970	42.5	63.75	80	45	1	7	85	75	154	4e-14	72.8	IPR000418; IPR013761; IPR003118; IPR011991	Y	ETV7	9606 [Organism: human] [Scientific Name: Homo sapiens]	Y	19	-	-	-	-	-	-	-	-	-	-
-	-	-	-	-	-	-	-	-	-	-	-	-	-	-	-	-	-	-	-	-	NP_001193970.1	NP_001193970	42.5	63.75	80	45	1	7	85	75	154	4e-14	72.8	IPR000418; IPR013761; IPR003118; IPR011991	Y	ETV7	9606 [Organism: human] [Scientific Name: Homo sapiens]	Y	19	-	-	-	-	-	-	-	-	-	-
-	-	-	-	-	-	-	-	-	-	-	-	-	-	-	-	-	-	-	-	-	NP_001193967.1	NP_001193967	42.5	63.75	80	45	1	7	85	149	228	5e-14	73.2	IPR000418; IPR013761; IPR003118; IPR011991	Y	ETV7	9606 [Organism: human] [Scientific Name: Homo sapiens]	Y	19	-	-	-	-	-	-	-	-	-	-
-	-	-	-	-	-	-	-	-	-	-	-	-	-	-	-	-	-	-	-	-	NP_001193967.1	NP_001193967	42.5	63.75	80	45	1	7	85	149	228	5e-14	73.2	IPR000418; IPR013761; IPR003118; IPR011991	Y	ETV7	9606 [Organism: human] [Scientific Name: Homo sapiens]	Y	19	-	-	-	-	-	-	-	-	-	-
-	-	-	-	-	-	-	-	-	-	-	-	-	-	-	-	-	-	-	-	-	NP_001193967.1	NP_001193967	42.5	63.75	80	45	1	7	85	149	228	5e-14	73.2	IPR000418; IPR013761; IPR003118; IPR011991	Y	ETV7	9606 [Organism: human] [Scientific Name: Homo sapiens]	Y	19	-	-	-	-	-	-	-	-	-	-
-	-	-	-	-	-	-	-	-	-	-	-	-	-	-	-	-	-	-	-	-	NP_001193967.1	NP_001193967	42.5	63.75	80	45	1	7	85	149	228	5e-14	73.2	IPR000418; IPR013761; IPR003118; IPR011991	Y	ETV7	9606 [Organism: human] [Scientific Name: Homo sapiens]	Y	19	-	-	-	-	-	-	-	-	-	-
-	-	-	-	-	-	-	-	-	-	-	-	-	-	-	-	-	-	-	-	-	NP_001193967.1	NP_001193967	42.5	63.75	80	45	1	7	85	149	228	5e-14	73.2	IPR000418; IPR013761; IPR003118; IPR011991	Y	ETV7	9606 [Organism: human] [Scientific Name: Homo sapiens]	Y	19	-	-	-	-	-	-	-	-	-	-
-	-	-	-	-	-	-	-	-	-	-	-	-	-	-	-	-	-	-	-	-	NP_001193969.1	NP_001193969	42.5	63.75	80	45	1	7	85	145	224	5e-14	72.8	IPR000418; IPR013761; IPR003118; IPR011991	Y	ETV7	9606 [Organism: human] [Scientific Name: Homo sapiens]	Y	19	-	-	-	-	-	-	-	-	-	-
-	-	-	-	-	-	-	-	-	-	-	-	-	-	-	-	-	-	-	-	-	NP_001193969.1	NP_001193969	42.5	63.75	80	45	1	7	85	145	224	5e-14	72.8	IPR000418; IPR013761; IPR003118; IPR011991	Y	ETV7	9606 [Organism: human] [Scientific Name: Homo sapiens]	Y	19	-	-	-	-	-	-	-	-	-	-
-	-	-	-	-	-	-	-	-	-	-	-	-	-	-	-	-	-	-	-	-	NP_001193969.1	NP_001193969	42.5	63.75	80	45	1	7	85	145	224	5e-14	72.8	IPR000418; IPR013761; IPR003118; IPR011991	Y	ETV7	9606 [Organism: human] [Scientific Name: Homo sapiens]	Y	19	-	-	-	-	-	-	-	-	-	-
-	-	-	-	-	-	-	-	-	-	-	-	-	-	-	-	-	-	-	-	-	NP_001193969.1	NP_001193969	42.5	63.75	80	45	1	7	85	145	224	5e-14	72.8	IPR000418; IPR013761; IPR003118; IPR011991	Y	ETV7	9606 [Organism: human] [Scientific Name: Homo sapiens]	Y	19	-	-	-	-	-	-	-	-	-	-
-	-	-	-	-	-	-	-	-	-	-	-	-	-	-	-	-	-	-	-	-	NP_001193969.1	NP_001193969	42.5	63.75	80	45	1	7	85	145	224	5e-14	72.8	IPR000418; IPR013761; IPR003118; IPR011991	Y	ETV7	9606 [Organism: human] [Scientific Name: Homo sapiens]	Y	19	-	-	-	-	-	-	-	-	-	-
-	-	-	-	-	-	-	-	-	-	-	-	-	-	-	-	-	-	-	-	-	NP_001193964.1	NP_001193964	42.31	62.82	78	44	1	7	83	226	303	6e-14	73.6	IPR000418; IPR013761; IPR003118; IPR011991	Y	ETV7	9606 [Organism: human] [Scientific Name: Homo sapiens]	Y	19	-	-	-	-	-	-	-	-	-	-
-	-	-	-	-	-	-	-	-	-	-	-	-	-	-	-	-	-	-	-	-	NP_001193964.1	NP_001193964	42.31	62.82	78	44	1	7	83	226	303	6e-14	73.6	IPR000418; IPR013761; IPR003118; IPR011991	Y	ETV7	9606 [Organism: human] [Scientific Name: Homo sapiens]	Y	19	-	-	-	-	-	-	-	-	-	-
-	-	-	-	-	-	-	-	-	-	-	-	-	-	-	-	-	-	-	-	-	NP_001193964.1	NP_001193964	42.31	62.82	78	44	1	7	83	226	303	6e-14	73.6	IPR000418; IPR013761; IPR003118; IPR011991	Y	ETV7	9606 [Organism: human] [Scientific Name: Homo sapiens]	Y	19	-	-	-	-	-	-	-	-	-	-
-	-	-	-	-	-	-	-	-	-	-	-	-	-	-	-	-	-	-	-	-	NP_001193964.1	NP_001193964	42.31	62.82	78	44	1	7	83	226	303	6e-14	73.6	IPR000418; IPR013761; IPR003118; IPR011991	Y	ETV7	9606 [Organism: human] [Scientific Name: Homo sapiens]	Y	19	-	-	-	-	-	-	-	-	-	-
-	-	-	-	-	-	-	-	-	-	-	-	-	-	-	-	-	-	-	-	-	NP_001193964.1	NP_001193964	42.31	62.82	78	44	1	7	83	226	303	6e-14	73.6	IPR000418; IPR013761; IPR003118; IPR011991	Y	ETV7	9606 [Organism: human] [Scientific Name: Homo sapiens]	Y	19	-	-	-	-	-	-	-	-	-	-
-	-	-	-	-	-	-	-	-	-	-	-	-	-	-	-	-	-	-	-	-	NP_001193966.1	NP_001193966	42.5	63.75	80	45	1	7	85	167	246	7e-14	72.8	IPR000418; IPR013761; IPR003118; IPR011991	Y	ETV7	9606 [Organism: human] [Scientific Name: Homo sapiens]	Y	19	-	-	-	-	-	-	-	-	-	-
-	-	-	-	-	-	-	-	-	-	-	-	-	-	-	-	-	-	-	-	-	NP_001193966.1	NP_001193966	42.5	63.75	80	45	1	7	85	167	246	7e-14	72.8	IPR000418; IPR013761; IPR003118; IPR011991	Y	ETV7	9606 [Organism: human] [Scientific Name: Homo sapiens]	Y	19	-	-	-	-	-	-	-	-	-	-
-	-	-	-	-	-	-	-	-	-	-	-	-	-	-	-	-	-	-	-	-	NP_001193966.1	NP_001193966	42.5	63.75	80	45	1	7	85	167	246	7e-14	72.8	IPR000418; IPR013761; IPR003118; IPR011991	Y	ETV7	9606 [Organism: human] [Scientific Name: Homo sapiens]	Y	19	-	-	-	-	-	-	-	-	-	-
-	-	-	-	-	-	-	-	-	-	-	-	-	-	-	-	-	-	-	-	-	NP_001193966.1	NP_001193966	42.5	63.75	80	45	1	7	85	167	246	7e-14	72.8	IPR000418; IPR013761; IPR003118; IPR011991	Y	ETV7	9606 [Organism: human] [Scientific Name: Homo sapiens]	Y	19	-	-	-	-	-	-	-	-	-	-
-	-	-	-	-	-	-	-	-	-	-	-	-	-	-	-	-	-	-	-	-	NP_001193966.1	NP_001193966	42.5	63.75	80	45	1	7	85	167	246	7e-14	72.8	IPR000418; IPR013761; IPR003118; IPR011991	Y	ETV7	9606 [Organism: human] [Scientific Name: Homo sapiens]	Y	19	-	-	-	-	-	-	-	-	-	-
1WWX	A	Q9UKW6	gi|159163467|pdb|1WWX|A	36.59	59.76	82	47	4	6	84	10	89	4e-10	53.1	13.2	1.4	83	107	37	MOLECULE: E74-LIKE FACTOR 5 ESE-2B;	NP_001230009.1	NP_001230009	36.59	59.76	82	47	4	6	84	69	148	3e-07	53.5	IPR003118; IPR013761; IPR000418; IPR011991	Y	ELF5	9606 [Organism: human] [Scientific Name: Homo sapiens]	Y	20	1WWX-A	-	-	-	-	-	-	-	-	-
1WWX	A	Q9UKW6	gi|159163467|pdb|1WWX|A	36.59	59.76	82	47	4	6	84	10	89	4e-10	53.1	13.2	1.4	83	107	37	MOLECULE: E74-LIKE FACTOR 5 ESE-2B;	NP_001230009.1	NP_001230009	36.59	59.76	82	47	4	6	84	69	148	3e-07	53.5	IPR003118; IPR013761; IPR000418; IPR011991	Y	ELF5	9606 [Organism: human] [Scientific Name: Homo sapiens]	Y	20	1WWX-A	-	-	-	-	-	-	-	-	-
1WWX	A	Q9UKW6	gi|159163467|pdb|1WWX|A	36.59	59.76	82	47	4	6	84	10	89	4e-10	53.1	13.2	1.4	83	107	37	MOLECULE: E74-LIKE FACTOR 5 ESE-2B;	NP_001230010.1	NP_001230010	36.59	59.76	82	47	4	6	84	96	175	3e-07	53.5	IPR003118; IPR013761; IPR000418; IPR011991	Y	ELF5	9606 [Organism: human] [Scientific Name: Homo sapiens]	Y	20	1WWX-A	-	-	-	-	-	-	-	-	-
1WWX	A	Q9UKW6	gi|159163467|pdb|1WWX|A	36.59	59.76	82	47	4	6	84	10	89	4e-10	53.1	13.2	1.4	83	107	37	MOLECULE: E74-LIKE FACTOR 5 ESE-2B;	NP_001230010.1	NP_001230010	36.59	59.76	82	47	4	6	84	96	175	3e-07	53.5	IPR003118; IPR013761; IPR000418; IPR011991	Y	ELF5	9606 [Organism: human] [Scientific Name: Homo sapiens]	Y	20	1WWX-A	-	-	-	-	-	-	-	-	-
1WWX	A	Q9UKW6	gi|159163467|pdb|1WWX|A	36.59	59.76	82	47	4	6	84	10	89	4e-10	53.1	13.2	1.4	83	107	37	MOLECULE: E74-LIKE FACTOR 5 ESE-2B;	NP_001413.1	NP_001413	36.59	59.76	82	47	4	6	84	164	243	9e-07	53.1	IPR003118; IPR013761; IPR000418; IPR011991	Y	ELF5	9606 [Organism: human] [Scientific Name: Homo sapiens]	Y	20	1WWX-A	-	-	-	-	-	-	-	-	-
1WWX	A	Q9UKW6	gi|159163467|pdb|1WWX|A	36.59	59.76	82	47	4	6	84	10	89	4e-10	53.1	13.2	1.4	83	107	37	MOLECULE: E74-LIKE FACTOR 5 ESE-2B;	NP_001413.1	NP_001413	36.59	59.76	82	47	4	6	84	164	243	9e-07	53.1	IPR003118; IPR013761; IPR000418; IPR011991	Y	ELF5	9606 [Organism: human] [Scientific Name: Homo sapiens]	Y	20	1WWX-A	-	-	-	-	-	-	-	-	-
1WWX	A	Q9UKW6	gi|159163467|pdb|1WWX|A	36.59	59.76	82	47	4	6	84	10	89	4e-10	53.1	13.2	1.4	83	107	37	MOLECULE: E74-LIKE FACTOR 5 ESE-2B;	NP_938195.1	NP_938195	36.59	59.76	82	47	4	6	84	174	253	1e-06	53.1	IPR003118; IPR013761; IPR000418; IPR011991	Y	ELF5	9606 [Organism: human] [Scientific Name: Homo sapiens]	Y	20	1WWX-A	-	-	-	-	-	-	-	-	-
1WWX	A	Q9UKW6	gi|159163467|pdb|1WWX|A	36.59	59.76	82	47	4	6	84	10	89	4e-10	53.1	13.2	1.4	83	107	37	MOLECULE: E74-LIKE FACTOR 5 ESE-2B;	NP_938195.1	NP_938195	36.59	59.76	82	47	4	6	84	174	253	1e-06	53.1	IPR003118; IPR013761; IPR000418; IPR011991	Y	ELF5	9606 [Organism: human] [Scientific Name: Homo sapiens]	Y	20	1WWX-A	-	-	-	-	-	-	-	-	-
-	-	-	-	-	-	-	-	-	-	-	-	-	-	-	-	-	-	-	-	-	NP_001107781.1	NP_001107781	36.14	56.63	83	49	3	5	84	273	354	5e-08	57.4	IPR017956; IPR003118; IPR013761; IPR000418; IPR011991	Y	ELF3	9606 [Organism: human] [Scientific Name: Homo sapiens]	Y	14	-	-	-	-	-	-	-	-	-	-
-	-	-	-	-	-	-	-	-	-	-	-	-	-	-	-	-	-	-	-	-	NP_001107781.1	NP_001107781	36.14	56.63	83	49	3	5	84	273	354	5e-08	57.4	IPR017956; IPR003118; IPR013761; IPR000418; IPR011991	Y	ELF3	9606 [Organism: human] [Scientific Name: Homo sapiens]	Y	14	-	-	-	-	-	-	-	-	-	-
-	-	-	-	-	-	-	-	-	-	-	-	-	-	-	-	-	-	-	-	-	NP_004424.3	NP_004424	36.14	56.63	83	49	3	5	84	273	354	5e-08	57.4	IPR017956; IPR003118; IPR013761; IPR000418; IPR011991	Y	ELF3	9606 [Organism: human] [Scientific Name: Homo sapiens]	Y	14	-	-	-	-	-	-	-	-	-	-
-	-	-	-	-	-	-	-	-	-	-	-	-	-	-	-	-	-	-	-	-	NP_001193544.1	NP_001193544	39.76	56.63	83	46	3	5	84	184	265	2e-09	60.8	IPR003118; IPR013761; IPR000418; IPR011991	Y	EHF	9606 [Organism: human] [Scientific Name: Homo sapiens]	Y	15	-	-	-	-	-	-	-	-	-	-
-	-	-	-	-	-	-	-	-	-	-	-	-	-	-	-	-	-	-	-	-	NP_001193544.1	NP_001193544	39.76	56.63	83	46	3	5	84	184	265	2e-09	60.8	IPR003118; IPR013761; IPR000418; IPR011991	Y	EHF	9606 [Organism: human] [Scientific Name: Homo sapiens]	Y	15	-	-	-	-	-	-	-	-	-	-
-	-	-	-	-	-	-	-	-	-	-	-	-	-	-	-	-	-	-	-	-	NP_036285.2	NP_036285	39.76	56.63	83	46	3	5	84	207	288	2e-09	60.8	IPR003118; IPR013761; IPR000418; IPR011991	Y	EHF	9606 [Organism: human] [Scientific Name: Homo sapiens]	Y	15	-	-	-	-	-	-	-	-	-	-
-	-	-	-	-	-	-	-	-	-	-	-	-	-	-	-	-	-	-	-	-	NP_036285.2	NP_036285	39.76	56.63	83	46	3	5	84	207	288	2e-09	60.8	IPR003118; IPR013761; IPR000418; IPR011991	Y	EHF	9606 [Organism: human] [Scientific Name: Homo sapiens]	Y	15	-	-	-	-	-	-	-	-	-	-
-	-	-	-	-	-	-	-	-	-	-	-	-	-	-	-	-	-	-	-	-	NP_001193545.1	NP_001193545	40.24	57.32	82	45	3	6	84	230	310	2e-09	60.8	IPR003118; IPR013761; IPR000418; IPR011991	Y	EHF	9606 [Organism: human] [Scientific Name: Homo sapiens]	Y	15	-	-	-	-	-	-	-	-	-	-
-	-	-	-	-	-	-	-	-	-	-	-	-	-	-	-	-	-	-	-	-	NP_001193545.1	NP_001193545	40.24	57.32	82	45	3	6	84	230	310	2e-09	60.8	IPR003118; IPR013761; IPR000418; IPR011991	Y	EHF	9606 [Organism: human] [Scientific Name: Homo sapiens]	Y	15	-	-	-	-	-	-	-	-	-	-
-	-	-	-	-	-	-	-	-	-	-	-	-	-	-	-	-	-	-	-	-	NP_001138825.1	NP_001138825	53.66	65.85	82	36	2	5	84	184	265	2e-20	93.6	IPR022084; IPR000418; IPR011991	Y	ELF1	9606 [Organism: human] [Scientific Name: Homo sapiens]	Y	13	-	-	-	-	-	-	-	-	-	-
-	-	-	-	-	-	-	-	-	-	-	-	-	-	-	-	-	-	-	-	-	NP_001138825.1	NP_001138825	53.66	65.85	82	36	2	5	84	184	265	2e-20	93.6	IPR022084; IPR000418; IPR011991	Y	ELF1	9606 [Organism: human] [Scientific Name: Homo sapiens]	Y	13	-	-	-	-	-	-	-	-	-	-
-	-	-	-	-	-	-	-	-	-	-	-	-	-	-	-	-	-	-	-	-	NP_001138825.1	NP_001138825	53.66	65.85	82	36	2	5	84	184	265	2e-20	93.6	IPR022084; IPR000418; IPR011991	Y	ELF1	9606 [Organism: human] [Scientific Name: Homo sapiens]	Y	13	-	-	-	-	-	-	-	-	-	-
-	-	-	-	-	-	-	-	-	-	-	-	-	-	-	-	-	-	-	-	-	NP_001138825.1	NP_001138825	53.66	65.85	82	36	2	5	84	184	265	2e-20	93.6	IPR022084; IPR000418; IPR011991	Y	ELF1	9606 [Organism: human] [Scientific Name: Homo sapiens]	Y	13	-	-	-	-	-	-	-	-	-	-
-	-	-	-	-	-	-	-	-	-	-	-	-	-	-	-	-	-	-	-	-	NP_001138825.1	NP_001138825	53.66	65.85	82	36	2	5	84	184	265	2e-20	93.6	IPR022084; IPR000418; IPR011991	Y	ELF1	9606 [Organism: human] [Scientific Name: Homo sapiens]	Y	13	-	-	-	-	-	-	-	-	-	-
-	-	-	-	-	-	-	-	-	-	-	-	-	-	-	-	-	-	-	-	-	NP_001138825.1	NP_001138825	53.66	65.85	82	36	2	5	84	184	265	2e-20	93.6	IPR022084; IPR000418; IPR011991	Y	ELF1	9606 [Organism: human] [Scientific Name: Homo sapiens]	Y	13	-	-	-	-	-	-	-	-	-	-
-	-	-	-	-	-	-	-	-	-	-	-	-	-	-	-	-	-	-	-	-	NP_001138825.1	NP_001138825	53.66	65.85	82	36	2	5	84	184	265	2e-20	93.6	IPR022084; IPR000418; IPR011991	Y	ELF1	9606 [Organism: human] [Scientific Name: Homo sapiens]	Y	13	-	-	-	-	-	-	-	-	-	-
-	-	-	-	-	-	-	-	-	-	-	-	-	-	-	-	-	-	-	-	-	NP_001138825.1	NP_001138825	53.66	65.85	82	36	2	5	84	184	265	2e-20	93.6	IPR022084; IPR000418; IPR011991	Y	ELF1	9606 [Organism: human] [Scientific Name: Homo sapiens]	Y	13	-	-	-	-	-	-	-	-	-	-
-	-	-	-	-	-	-	-	-	-	-	-	-	-	-	-	-	-	-	-	-	NP_001138825.1	NP_001138825	53.66	65.85	82	36	2	5	84	184	265	2e-20	93.6	IPR022084; IPR000418; IPR011991	Y	ELF1	9606 [Organism: human] [Scientific Name: Homo sapiens]	Y	13	-	-	-	-	-	-	-	-	-	-
-	-	-	-	-	-	-	-	-	-	-	-	-	-	-	-	-	-	-	-	-	NP_001138825.1	NP_001138825	53.66	65.85	82	36	2	5	84	184	265	2e-20	93.6	IPR022084; IPR000418; IPR011991	Y	ELF1	9606 [Organism: human] [Scientific Name: Homo sapiens]	Y	13	-	-	-	-	-	-	-	-	-	-
-	-	-	-	-	-	-	-	-	-	-	-	-	-	-	-	-	-	-	-	-	NP_001138825.1	NP_001138825	53.66	65.85	82	36	2	5	84	184	265	2e-20	93.6	IPR022084; IPR000418; IPR011991	Y	ELF1	9606 [Organism: human] [Scientific Name: Homo sapiens]	Y	13	-	-	-	-	-	-	-	-	-	-
-	-	-	-	-	-	-	-	-	-	-	-	-	-	-	-	-	-	-	-	-	NP_001138825.1	NP_001138825	53.66	65.85	82	36	2	5	84	184	265	2e-20	93.6	IPR022084; IPR000418; IPR011991	Y	ELF1	9606 [Organism: human] [Scientific Name: Homo sapiens]	Y	13	-	-	-	-	-	-	-	-	-	-
-	-	-	-	-	-	-	-	-	-	-	-	-	-	-	-	-	-	-	-	-	NP_001138825.1	NP_001138825	53.66	65.85	82	36	2	5	84	184	265	2e-20	93.6	IPR022084; IPR000418; IPR011991	Y	ELF1	9606 [Organism: human] [Scientific Name: Homo sapiens]	Y	13	-	-	-	-	-	-	-	-	-	-
-	-	-	-	-	-	-	-	-	-	-	-	-	-	-	-	-	-	-	-	-	NP_001138825.1	NP_001138825	53.66	65.85	82	36	2	5	84	184	265	2e-20	93.6	IPR022084; IPR000418; IPR011991	Y	ELF1	9606 [Organism: human] [Scientific Name: Homo sapiens]	Y	13	-	-	-	-	-	-	-	-	-	-
-	-	-	-	-	-	-	-	-	-	-	-	-	-	-	-	-	-	-	-	-	NP_001138825.1	NP_001138825	53.66	65.85	82	36	2	5	84	184	265	2e-20	93.6	IPR022084; IPR000418; IPR011991	Y	ELF1	9606 [Organism: human] [Scientific Name: Homo sapiens]	Y	13	-	-	-	-	-	-	-	-	-	-
-	-	-	-	-	-	-	-	-	-	-	-	-	-	-	-	-	-	-	-	-	NP_001138825.1	NP_001138825	53.66	65.85	82	36	2	5	84	184	265	2e-20	93.6	IPR022084; IPR000418; IPR011991	Y	ELF1	9606 [Organism: human] [Scientific Name: Homo sapiens]	Y	13	-	-	-	-	-	-	-	-	-	-
-	-	-	-	-	-	-	-	-	-	-	-	-	-	-	-	-	-	-	-	-	NP_001138825.1	NP_001138825	53.66	65.85	82	36	2	5	84	184	265	2e-20	93.6	IPR022084; IPR000418; IPR011991	Y	ELF1	9606 [Organism: human] [Scientific Name: Homo sapiens]	Y	13	-	-	-	-	-	-	-	-	-	-
-	-	-	-	-	-	-	-	-	-	-	-	-	-	-	-	-	-	-	-	-	NP_001138825.1	NP_001138825	53.66	65.85	82	36	2	5	84	184	265	2e-20	93.6	IPR022084; IPR000418; IPR011991	Y	ELF1	9606 [Organism: human] [Scientific Name: Homo sapiens]	Y	13	-	-	-	-	-	-	-	-	-	-
-	-	-	-	-	-	-	-	-	-	-	-	-	-	-	-	-	-	-	-	-	NP_001138825.1	NP_001138825	53.66	65.85	82	36	2	5	84	184	265	2e-20	93.6	IPR022084; IPR000418; IPR011991	Y	ELF1	9606 [Organism: human] [Scientific Name: Homo sapiens]	Y	13	-	-	-	-	-	-	-	-	-	-
-	-	-	-	-	-	-	-	-	-	-	-	-	-	-	-	-	-	-	-	-	NP_001138825.1	NP_001138825	53.66	65.85	82	36	2	5	84	184	265	2e-20	93.6	IPR022084; IPR000418; IPR011991	Y	ELF1	9606 [Organism: human] [Scientific Name: Homo sapiens]	Y	13	-	-	-	-	-	-	-	-	-	-
-	-	-	-	-	-	-	-	-	-	-	-	-	-	-	-	-	-	-	-	-	NP_001138825.1	NP_001138825	53.66	65.85	82	36	2	5	84	184	265	2e-20	93.6	IPR022084; IPR000418; IPR011991	Y	ELF1	9606 [Organism: human] [Scientific Name: Homo sapiens]	Y	13	-	-	-	-	-	-	-	-	-	-
-	-	-	-	-	-	-	-	-	-	-	-	-	-	-	-	-	-	-	-	-	NP_001138825.1	NP_001138825	53.66	65.85	82	36	2	5	84	184	265	2e-20	93.6	IPR022084; IPR000418; IPR011991	Y	ELF1	9606 [Organism: human] [Scientific Name: Homo sapiens]	Y	13	-	-	-	-	-	-	-	-	-	-
-	-	-	-	-	-	-	-	-	-	-	-	-	-	-	-	-	-	-	-	-	NP_001138825.1	NP_001138825	53.66	65.85	82	36	2	5	84	184	265	2e-20	93.6	IPR022084; IPR000418; IPR011991	Y	ELF1	9606 [Organism: human] [Scientific Name: Homo sapiens]	Y	13	-	-	-	-	-	-	-	-	-	-
-	-	-	-	-	-	-	-	-	-	-	-	-	-	-	-	-	-	-	-	-	NP_001138825.1	NP_001138825	53.66	65.85	82	36	2	5	84	184	265	2e-20	93.6	IPR022084; IPR000418; IPR011991	Y	ELF1	9606 [Organism: human] [Scientific Name: Homo sapiens]	Y	13	-	-	-	-	-	-	-	-	-	-
-	-	-	-	-	-	-	-	-	-	-	-	-	-	-	-	-	-	-	-	-	NP_001138825.1	NP_001138825	53.66	65.85	82	36	2	5	84	184	265	2e-20	93.6	IPR022084; IPR000418; IPR011991	Y	ELF1	9606 [Organism: human] [Scientific Name: Homo sapiens]	Y	13	-	-	-	-	-	-	-	-	-	-
-	-	-	-	-	-	-	-	-	-	-	-	-	-	-	-	-	-	-	-	-	NP_001138825.1	NP_001138825	53.66	65.85	82	36	2	5	84	184	265	2e-20	93.6	IPR022084; IPR000418; IPR011991	Y	ELF1	9606 [Organism: human] [Scientific Name: Homo sapiens]	Y	13	-	-	-	-	-	-	-	-	-	-
-	-	-	-	-	-	-	-	-	-	-	-	-	-	-	-	-	-	-	-	-	NP_001138825.1	NP_001138825	53.66	65.85	82	36	2	5	84	184	265	2e-20	93.6	IPR022084; IPR000418; IPR011991	Y	ELF1	9606 [Organism: human] [Scientific Name: Homo sapiens]	Y	13	-	-	-	-	-	-	-	-	-	-
-	-	-	-	-	-	-	-	-	-	-	-	-	-	-	-	-	-	-	-	-	NP_001138825.1	NP_001138825	53.66	65.85	82	36	2	5	84	184	265	2e-20	93.6	IPR022084; IPR000418; IPR011991	Y	ELF1	9606 [Organism: human] [Scientific Name: Homo sapiens]	Y	13	-	-	-	-	-	-	-	-	-	-
-	-	-	-	-	-	-	-	-	-	-	-	-	-	-	-	-	-	-	-	-	NP_001138825.1	NP_001138825	53.66	65.85	82	36	2	5	84	184	265	2e-20	93.6	IPR022084; IPR000418; IPR011991	Y	ELF1	9606 [Organism: human] [Scientific Name: Homo sapiens]	Y	13	-	-	-	-	-	-	-	-	-	-
-	-	-	-	-	-	-	-	-	-	-	-	-	-	-	-	-	-	-	-	-	NP_001138825.1	NP_001138825	53.66	65.85	82	36	2	5	84	184	265	2e-20	93.6	IPR022084; IPR000418; IPR011991	Y	ELF1	9606 [Organism: human] [Scientific Name: Homo sapiens]	Y	13	-	-	-	-	-	-	-	-	-	-
-	-	-	-	-	-	-	-	-	-	-	-	-	-	-	-	-	-	-	-	-	NP_001138825.1	NP_001138825	53.66	65.85	82	36	2	5	84	184	265	2e-20	93.6	IPR022084; IPR000418; IPR011991	Y	ELF1	9606 [Organism: human] [Scientific Name: Homo sapiens]	Y	13	-	-	-	-	-	-	-	-	-	-
-	-	-	-	-	-	-	-	-	-	-	-	-	-	-	-	-	-	-	-	-	NP_001138825.1	NP_001138825	53.66	65.85	82	36	2	5	84	184	265	2e-20	93.6	IPR022084; IPR000418; IPR011991	Y	ELF1	9606 [Organism: human] [Scientific Name: Homo sapiens]	Y	13	-	-	-	-	-	-	-	-	-	-
-	-	-	-	-	-	-	-	-	-	-	-	-	-	-	-	-	-	-	-	-	NP_001138825.1	NP_001138825	53.66	65.85	82	36	2	5	84	184	265	2e-20	93.6	IPR022084; IPR000418; IPR011991	Y	ELF1	9606 [Organism: human] [Scientific Name: Homo sapiens]	Y	13	-	-	-	-	-	-	-	-	-	-
-	-	-	-	-	-	-	-	-	-	-	-	-	-	-	-	-	-	-	-	-	NP_001138825.1	NP_001138825	53.66	65.85	82	36	2	5	84	184	265	2e-20	93.6	IPR022084; IPR000418; IPR011991	Y	ELF1	9606 [Organism: human] [Scientific Name: Homo sapiens]	Y	13	-	-	-	-	-	-	-	-	-	-
-	-	-	-	-	-	-	-	-	-	-	-	-	-	-	-	-	-	-	-	-	NP_001138825.1	NP_001138825	53.66	65.85	82	36	2	5	84	184	265	2e-20	93.6	IPR022084; IPR000418; IPR011991	Y	ELF1	9606 [Organism: human] [Scientific Name: Homo sapiens]	Y	13	-	-	-	-	-	-	-	-	-	-
-	-	-	-	-	-	-	-	-	-	-	-	-	-	-	-	-	-	-	-	-	NP_001138825.1	NP_001138825	53.66	65.85	82	36	2	5	84	184	265	2e-20	93.6	IPR022084; IPR000418; IPR011991	Y	ELF1	9606 [Organism: human] [Scientific Name: Homo sapiens]	Y	13	-	-	-	-	-	-	-	-	-	-
-	-	-	-	-	-	-	-	-	-	-	-	-	-	-	-	-	-	-	-	-	NP_001138825.1	NP_001138825	53.66	65.85	82	36	2	5	84	184	265	2e-20	93.6	IPR022084; IPR000418; IPR011991	Y	ELF1	9606 [Organism: human] [Scientific Name: Homo sapiens]	Y	13	-	-	-	-	-	-	-	-	-	-
-	-	-	-	-	-	-	-	-	-	-	-	-	-	-	-	-	-	-	-	-	NP_001138825.1	NP_001138825	53.66	65.85	82	36	2	5	84	184	265	2e-20	93.6	IPR022084; IPR000418; IPR011991	Y	ELF1	9606 [Organism: human] [Scientific Name: Homo sapiens]	Y	13	-	-	-	-	-	-	-	-	-	-
-	-	-	-	-	-	-	-	-	-	-	-	-	-	-	-	-	-	-	-	-	NP_001138825.1	NP_001138825	53.66	65.85	82	36	2	5	84	184	265	2e-20	93.6	IPR022084; IPR000418; IPR011991	Y	ELF1	9606 [Organism: human] [Scientific Name: Homo sapiens]	Y	13	-	-	-	-	-	-	-	-	-	-
-	-	-	-	-	-	-	-	-	-	-	-	-	-	-	-	-	-	-	-	-	NP_001138825.1	NP_001138825	53.66	65.85	82	36	2	5	84	184	265	2e-20	93.6	IPR022084; IPR000418; IPR011991	Y	ELF1	9606 [Organism: human] [Scientific Name: Homo sapiens]	Y	13	-	-	-	-	-	-	-	-	-	-
-	-	-	-	-	-	-	-	-	-	-	-	-	-	-	-	-	-	-	-	-	NP_758961.1	NP_758961	53.66	65.85	82	36	2	5	84	208	289	2e-20	93.6	IPR022084; IPR000418; IPR011991	Y	ELF1	9606 [Organism: human] [Scientific Name: Homo sapiens]	Y	13	-	-	-	-	-	-	-	-	-	-
-	-	-	-	-	-	-	-	-	-	-	-	-	-	-	-	-	-	-	-	-	NP_758961.1	NP_758961	53.66	65.85	82	36	2	5	84	208	289	2e-20	93.6	IPR022084; IPR000418; IPR011991	Y	ELF1	9606 [Organism: human] [Scientific Name: Homo sapiens]	Y	13	-	-	-	-	-	-	-	-	-	-
-	-	-	-	-	-	-	-	-	-	-	-	-	-	-	-	-	-	-	-	-	NP_758961.1	NP_758961	53.66	65.85	82	36	2	5	84	208	289	2e-20	93.6	IPR022084; IPR000418; IPR011991	Y	ELF1	9606 [Organism: human] [Scientific Name: Homo sapiens]	Y	13	-	-	-	-	-	-	-	-	-	-
-	-	-	-	-	-	-	-	-	-	-	-	-	-	-	-	-	-	-	-	-	NP_758961.1	NP_758961	53.66	65.85	82	36	2	5	84	208	289	2e-20	93.6	IPR022084; IPR000418; IPR011991	Y	ELF1	9606 [Organism: human] [Scientific Name: Homo sapiens]	Y	13	-	-	-	-	-	-	-	-	-	-
-	-	-	-	-	-	-	-	-	-	-	-	-	-	-	-	-	-	-	-	-	NP_758961.1	NP_758961	53.66	65.85	82	36	2	5	84	208	289	2e-20	93.6	IPR022084; IPR000418; IPR011991	Y	ELF1	9606 [Organism: human] [Scientific Name: Homo sapiens]	Y	13	-	-	-	-	-	-	-	-	-	-
-	-	-	-	-	-	-	-	-	-	-	-	-	-	-	-	-	-	-	-	-	NP_758961.1	NP_758961	53.66	65.85	82	36	2	5	84	208	289	2e-20	93.6	IPR022084; IPR000418; IPR011991	Y	ELF1	9606 [Organism: human] [Scientific Name: Homo sapiens]	Y	13	-	-	-	-	-	-	-	-	-	-
-	-	-	-	-	-	-	-	-	-	-	-	-	-	-	-	-	-	-	-	-	NP_758961.1	NP_758961	53.66	65.85	82	36	2	5	84	208	289	2e-20	93.6	IPR022084; IPR000418; IPR011991	Y	ELF1	9606 [Organism: human] [Scientific Name: Homo sapiens]	Y	13	-	-	-	-	-	-	-	-	-	-
-	-	-	-	-	-	-	-	-	-	-	-	-	-	-	-	-	-	-	-	-	NP_758961.1	NP_758961	53.66	65.85	82	36	2	5	84	208	289	2e-20	93.6	IPR022084; IPR000418; IPR011991	Y	ELF1	9606 [Organism: human] [Scientific Name: Homo sapiens]	Y	13	-	-	-	-	-	-	-	-	-	-
-	-	-	-	-	-	-	-	-	-	-	-	-	-	-	-	-	-	-	-	-	NP_758961.1	NP_758961	53.66	65.85	82	36	2	5	84	208	289	2e-20	93.6	IPR022084; IPR000418; IPR011991	Y	ELF1	9606 [Organism: human] [Scientific Name: Homo sapiens]	Y	13	-	-	-	-	-	-	-	-	-	-
-	-	-	-	-	-	-	-	-	-	-	-	-	-	-	-	-	-	-	-	-	NP_758961.1	NP_758961	53.66	65.85	82	36	2	5	84	208	289	2e-20	93.6	IPR022084; IPR000418; IPR011991	Y	ELF1	9606 [Organism: human] [Scientific Name: Homo sapiens]	Y	13	-	-	-	-	-	-	-	-	-	-
-	-	-	-	-	-	-	-	-	-	-	-	-	-	-	-	-	-	-	-	-	NP_758961.1	NP_758961	53.66	65.85	82	36	2	5	84	208	289	2e-20	93.6	IPR022084; IPR000418; IPR011991	Y	ELF1	9606 [Organism: human] [Scientific Name: Homo sapiens]	Y	13	-	-	-	-	-	-	-	-	-	-
-	-	-	-	-	-	-	-	-	-	-	-	-	-	-	-	-	-	-	-	-	NP_758961.1	NP_758961	53.66	65.85	82	36	2	5	84	208	289	2e-20	93.6	IPR022084; IPR000418; IPR011991	Y	ELF1	9606 [Organism: human] [Scientific Name: Homo sapiens]	Y	13	-	-	-	-	-	-	-	-	-	-
-	-	-	-	-	-	-	-	-	-	-	-	-	-	-	-	-	-	-	-	-	NP_758961.1	NP_758961	53.66	65.85	82	36	2	5	84	208	289	2e-20	93.6	IPR022084; IPR000418; IPR011991	Y	ELF1	9606 [Organism: human] [Scientific Name: Homo sapiens]	Y	13	-	-	-	-	-	-	-	-	-	-
-	-	-	-	-	-	-	-	-	-	-	-	-	-	-	-	-	-	-	-	-	NP_758961.1	NP_758961	53.66	65.85	82	36	2	5	84	208	289	2e-20	93.6	IPR022084; IPR000418; IPR011991	Y	ELF1	9606 [Organism: human] [Scientific Name: Homo sapiens]	Y	13	-	-	-	-	-	-	-	-	-	-
-	-	-	-	-	-	-	-	-	-	-	-	-	-	-	-	-	-	-	-	-	NP_758961.1	NP_758961	53.66	65.85	82	36	2	5	84	208	289	2e-20	93.6	IPR022084; IPR000418; IPR011991	Y	ELF1	9606 [Organism: human] [Scientific Name: Homo sapiens]	Y	13	-	-	-	-	-	-	-	-	-	-
-	-	-	-	-	-	-	-	-	-	-	-	-	-	-	-	-	-	-	-	-	NP_758961.1	NP_758961	53.66	65.85	82	36	2	5	84	208	289	2e-20	93.6	IPR022084; IPR000418; IPR011991	Y	ELF1	9606 [Organism: human] [Scientific Name: Homo sapiens]	Y	13	-	-	-	-	-	-	-	-	-	-
-	-	-	-	-	-	-	-	-	-	-	-	-	-	-	-	-	-	-	-	-	NP_758961.1	NP_758961	53.66	65.85	82	36	2	5	84	208	289	2e-20	93.6	IPR022084; IPR000418; IPR011991	Y	ELF1	9606 [Organism: human] [Scientific Name: Homo sapiens]	Y	13	-	-	-	-	-	-	-	-	-	-
-	-	-	-	-	-	-	-	-	-	-	-	-	-	-	-	-	-	-	-	-	NP_758961.1	NP_758961	53.66	65.85	82	36	2	5	84	208	289	2e-20	93.6	IPR022084; IPR000418; IPR011991	Y	ELF1	9606 [Organism: human] [Scientific Name: Homo sapiens]	Y	13	-	-	-	-	-	-	-	-	-	-
-	-	-	-	-	-	-	-	-	-	-	-	-	-	-	-	-	-	-	-	-	NP_758961.1	NP_758961	53.66	65.85	82	36	2	5	84	208	289	2e-20	93.6	IPR022084; IPR000418; IPR011991	Y	ELF1	9606 [Organism: human] [Scientific Name: Homo sapiens]	Y	13	-	-	-	-	-	-	-	-	-	-
-	-	-	-	-	-	-	-	-	-	-	-	-	-	-	-	-	-	-	-	-	NP_758961.1	NP_758961	53.66	65.85	82	36	2	5	84	208	289	2e-20	93.6	IPR022084; IPR000418; IPR011991	Y	ELF1	9606 [Organism: human] [Scientific Name: Homo sapiens]	Y	13	-	-	-	-	-	-	-	-	-	-
-	-	-	-	-	-	-	-	-	-	-	-	-	-	-	-	-	-	-	-	-	NP_758961.1	NP_758961	53.66	65.85	82	36	2	5	84	208	289	2e-20	93.6	IPR022084; IPR000418; IPR011991	Y	ELF1	9606 [Organism: human] [Scientific Name: Homo sapiens]	Y	13	-	-	-	-	-	-	-	-	-	-
-	-	-	-	-	-	-	-	-	-	-	-	-	-	-	-	-	-	-	-	-	NP_758961.1	NP_758961	53.66	65.85	82	36	2	5	84	208	289	2e-20	93.6	IPR022084; IPR000418; IPR011991	Y	ELF1	9606 [Organism: human] [Scientific Name: Homo sapiens]	Y	13	-	-	-	-	-	-	-	-	-	-
-	-	-	-	-	-	-	-	-	-	-	-	-	-	-	-	-	-	-	-	-	NP_758961.1	NP_758961	53.66	65.85	82	36	2	5	84	208	289	2e-20	93.6	IPR022084; IPR000418; IPR011991	Y	ELF1	9606 [Organism: human] [Scientific Name: Homo sapiens]	Y	13	-	-	-	-	-	-	-	-	-	-
-	-	-	-	-	-	-	-	-	-	-	-	-	-	-	-	-	-	-	-	-	NP_758961.1	NP_758961	53.66	65.85	82	36	2	5	84	208	289	2e-20	93.6	IPR022084; IPR000418; IPR011991	Y	ELF1	9606 [Organism: human] [Scientific Name: Homo sapiens]	Y	13	-	-	-	-	-	-	-	-	-	-
-	-	-	-	-	-	-	-	-	-	-	-	-	-	-	-	-	-	-	-	-	NP_758961.1	NP_758961	53.66	65.85	82	36	2	5	84	208	289	2e-20	93.6	IPR022084; IPR000418; IPR011991	Y	ELF1	9606 [Organism: human] [Scientific Name: Homo sapiens]	Y	13	-	-	-	-	-	-	-	-	-	-
-	-	-	-	-	-	-	-	-	-	-	-	-	-	-	-	-	-	-	-	-	NP_758961.1	NP_758961	53.66	65.85	82	36	2	5	84	208	289	2e-20	93.6	IPR022084; IPR000418; IPR011991	Y	ELF1	9606 [Organism: human] [Scientific Name: Homo sapiens]	Y	13	-	-	-	-	-	-	-	-	-	-
-	-	-	-	-	-	-	-	-	-	-	-	-	-	-	-	-	-	-	-	-	NP_758961.1	NP_758961	53.66	65.85	82	36	2	5	84	208	289	2e-20	93.6	IPR022084; IPR000418; IPR011991	Y	ELF1	9606 [Organism: human] [Scientific Name: Homo sapiens]	Y	13	-	-	-	-	-	-	-	-	-	-
-	-	-	-	-	-	-	-	-	-	-	-	-	-	-	-	-	-	-	-	-	NP_758961.1	NP_758961	53.66	65.85	82	36	2	5	84	208	289	2e-20	93.6	IPR022084; IPR000418; IPR011991	Y	ELF1	9606 [Organism: human] [Scientific Name: Homo sapiens]	Y	13	-	-	-	-	-	-	-	-	-	-
-	-	-	-	-	-	-	-	-	-	-	-	-	-	-	-	-	-	-	-	-	NP_758961.1	NP_758961	53.66	65.85	82	36	2	5	84	208	289	2e-20	93.6	IPR022084; IPR000418; IPR011991	Y	ELF1	9606 [Organism: human] [Scientific Name: Homo sapiens]	Y	13	-	-	-	-	-	-	-	-	-	-
-	-	-	-	-	-	-	-	-	-	-	-	-	-	-	-	-	-	-	-	-	NP_758961.1	NP_758961	53.66	65.85	82	36	2	5	84	208	289	2e-20	93.6	IPR022084; IPR000418; IPR011991	Y	ELF1	9606 [Organism: human] [Scientific Name: Homo sapiens]	Y	13	-	-	-	-	-	-	-	-	-	-
-	-	-	-	-	-	-	-	-	-	-	-	-	-	-	-	-	-	-	-	-	NP_758961.1	NP_758961	53.66	65.85	82	36	2	5	84	208	289	2e-20	93.6	IPR022084; IPR000418; IPR011991	Y	ELF1	9606 [Organism: human] [Scientific Name: Homo sapiens]	Y	13	-	-	-	-	-	-	-	-	-	-
-	-	-	-	-	-	-	-	-	-	-	-	-	-	-	-	-	-	-	-	-	NP_758961.1	NP_758961	53.66	65.85	82	36	2	5	84	208	289	2e-20	93.6	IPR022084; IPR000418; IPR011991	Y	ELF1	9606 [Organism: human] [Scientific Name: Homo sapiens]	Y	13	-	-	-	-	-	-	-	-	-	-
-	-	-	-	-	-	-	-	-	-	-	-	-	-	-	-	-	-	-	-	-	NP_758961.1	NP_758961	53.66	65.85	82	36	2	5	84	208	289	2e-20	93.6	IPR022084; IPR000418; IPR011991	Y	ELF1	9606 [Organism: human] [Scientific Name: Homo sapiens]	Y	13	-	-	-	-	-	-	-	-	-	-
-	-	-	-	-	-	-	-	-	-	-	-	-	-	-	-	-	-	-	-	-	NP_758961.1	NP_758961	53.66	65.85	82	36	2	5	84	208	289	2e-20	93.6	IPR022084; IPR000418; IPR011991	Y	ELF1	9606 [Organism: human] [Scientific Name: Homo sapiens]	Y	13	-	-	-	-	-	-	-	-	-	-
-	-	-	-	-	-	-	-	-	-	-	-	-	-	-	-	-	-	-	-	-	NP_758961.1	NP_758961	53.66	65.85	82	36	2	5	84	208	289	2e-20	93.6	IPR022084; IPR000418; IPR011991	Y	ELF1	9606 [Organism: human] [Scientific Name: Homo sapiens]	Y	13	-	-	-	-	-	-	-	-	-	-
-	-	-	-	-	-	-	-	-	-	-	-	-	-	-	-	-	-	-	-	-	NP_758961.1	NP_758961	53.66	65.85	82	36	2	5	84	208	289	2e-20	93.6	IPR022084; IPR000418; IPR011991	Y	ELF1	9606 [Organism: human] [Scientific Name: Homo sapiens]	Y	13	-	-	-	-	-	-	-	-	-	-
-	-	-	-	-	-	-	-	-	-	-	-	-	-	-	-	-	-	-	-	-	NP_758961.1	NP_758961	53.66	65.85	82	36	2	5	84	208	289	2e-20	93.6	IPR022084; IPR000418; IPR011991	Y	ELF1	9606 [Organism: human] [Scientific Name: Homo sapiens]	Y	13	-	-	-	-	-	-	-	-	-	-
-	-	-	-	-	-	-	-	-	-	-	-	-	-	-	-	-	-	-	-	-	NP_758961.1	NP_758961	53.66	65.85	82	36	2	5	84	208	289	2e-20	93.6	IPR022084; IPR000418; IPR011991	Y	ELF1	9606 [Organism: human] [Scientific Name: Homo sapiens]	Y	13	-	-	-	-	-	-	-	-	-	-
-	-	-	-	-	-	-	-	-	-	-	-	-	-	-	-	-	-	-	-	-	NP_758961.1	NP_758961	53.66	65.85	82	36	2	5	84	208	289	2e-20	93.6	IPR022084; IPR000418; IPR011991	Y	ELF1	9606 [Organism: human] [Scientific Name: Homo sapiens]	Y	13	-	-	-	-	-	-	-	-	-	-
-	-	-	-	-	-	-	-	-	-	-	-	-	-	-	-	-	-	-	-	-	NP_758961.1	NP_758961	53.66	65.85	82	36	2	5	84	208	289	2e-20	93.6	IPR022084; IPR000418; IPR011991	Y	ELF1	9606 [Organism: human] [Scientific Name: Homo sapiens]	Y	13	-	-	-	-	-	-	-	-	-	-
-	-	-	-	-	-	-	-	-	-	-	-	-	-	-	-	-	-	-	-	-	NP_001263388.1	NP_001263388	52.5	67.5	80	36	2	7	84	109	188	6e-20	91.7	IPR022084; IPR000418; IPR011991	Y	ELF2	9606 [Organism: human] [Scientific Name: Homo sapiens]	Y	13	-	-	-	-	-	-	-	-	-	-
-	-	-	-	-	-	-	-	-	-	-	-	-	-	-	-	-	-	-	-	-	NP_001263388.1	NP_001263388	52.5	67.5	80	36	2	7	84	109	188	6e-20	91.7	IPR022084; IPR000418; IPR011991	Y	ELF2	9606 [Organism: human] [Scientific Name: Homo sapiens]	Y	13	-	-	-	-	-	-	-	-	-	-
-	-	-	-	-	-	-	-	-	-	-	-	-	-	-	-	-	-	-	-	-	NP_001263388.1	NP_001263388	52.5	67.5	80	36	2	7	84	109	188	6e-20	91.7	IPR022084; IPR000418; IPR011991	Y	ELF2	9606 [Organism: human] [Scientific Name: Homo sapiens]	Y	13	-	-	-	-	-	-	-	-	-	-
-	-	-	-	-	-	-	-	-	-	-	-	-	-	-	-	-	-	-	-	-	NP_001263388.1	NP_001263388	52.5	67.5	80	36	2	7	84	109	188	6e-20	91.7	IPR022084; IPR000418; IPR011991	Y	ELF2	9606 [Organism: human] [Scientific Name: Homo sapiens]	Y	13	-	-	-	-	-	-	-	-	-	-
-	-	-	-	-	-	-	-	-	-	-	-	-	-	-	-	-	-	-	-	-	NP_001263388.1	NP_001263388	52.5	67.5	80	36	2	7	84	109	188	6e-20	91.7	IPR022084; IPR000418; IPR011991	Y	ELF2	9606 [Organism: human] [Scientific Name: Homo sapiens]	Y	13	-	-	-	-	-	-	-	-	-	-
-	-	-	-	-	-	-	-	-	-	-	-	-	-	-	-	-	-	-	-	-	NP_001263388.1	NP_001263388	52.5	67.5	80	36	2	7	84	109	188	6e-20	91.7	IPR022084; IPR000418; IPR011991	Y	ELF2	9606 [Organism: human] [Scientific Name: Homo sapiens]	Y	13	-	-	-	-	-	-	-	-	-	-
-	-	-	-	-	-	-	-	-	-	-	-	-	-	-	-	-	-	-	-	-	NP_001263388.1	NP_001263388	52.5	67.5	80	36	2	7	84	109	188	6e-20	91.7	IPR022084; IPR000418; IPR011991	Y	ELF2	9606 [Organism: human] [Scientific Name: Homo sapiens]	Y	13	-	-	-	-	-	-	-	-	-	-
-	-	-	-	-	-	-	-	-	-	-	-	-	-	-	-	-	-	-	-	-	NP_001263388.1	NP_001263388	52.5	67.5	80	36	2	7	84	109	188	6e-20	91.7	IPR022084; IPR000418; IPR011991	Y	ELF2	9606 [Organism: human] [Scientific Name: Homo sapiens]	Y	13	-	-	-	-	-	-	-	-	-	-
-	-	-	-	-	-	-	-	-	-	-	-	-	-	-	-	-	-	-	-	-	NP_001263388.1	NP_001263388	52.5	67.5	80	36	2	7	84	109	188	6e-20	91.7	IPR022084; IPR000418; IPR011991	Y	ELF2	9606 [Organism: human] [Scientific Name: Homo sapiens]	Y	13	-	-	-	-	-	-	-	-	-	-
-	-	-	-	-	-	-	-	-	-	-	-	-	-	-	-	-	-	-	-	-	NP_001263388.1	NP_001263388	52.5	67.5	80	36	2	7	84	109	188	6e-20	91.7	IPR022084; IPR000418; IPR011991	Y	ELF2	9606 [Organism: human] [Scientific Name: Homo sapiens]	Y	13	-	-	-	-	-	-	-	-	-	-
-	-	-	-	-	-	-	-	-	-	-	-	-	-	-	-	-	-	-	-	-	NP_001263388.1	NP_001263388	52.5	67.5	80	36	2	7	84	109	188	6e-20	91.7	IPR022084; IPR000418; IPR011991	Y	ELF2	9606 [Organism: human] [Scientific Name: Homo sapiens]	Y	13	-	-	-	-	-	-	-	-	-	-
-	-	-	-	-	-	-	-	-	-	-	-	-	-	-	-	-	-	-	-	-	NP_001263388.1	NP_001263388	52.5	67.5	80	36	2	7	84	109	188	6e-20	91.7	IPR022084; IPR000418; IPR011991	Y	ELF2	9606 [Organism: human] [Scientific Name: Homo sapiens]	Y	13	-	-	-	-	-	-	-	-	-	-
-	-	-	-	-	-	-	-	-	-	-	-	-	-	-	-	-	-	-	-	-	NP_001263388.1	NP_001263388	52.5	67.5	80	36	2	7	84	109	188	6e-20	91.7	IPR022084; IPR000418; IPR011991	Y	ELF2	9606 [Organism: human] [Scientific Name: Homo sapiens]	Y	13	-	-	-	-	-	-	-	-	-	-
-	-	-	-	-	-	-	-	-	-	-	-	-	-	-	-	-	-	-	-	-	NP_001263388.1	NP_001263388	52.5	67.5	80	36	2	7	84	109	188	6e-20	91.7	IPR022084; IPR000418; IPR011991	Y	ELF2	9606 [Organism: human] [Scientific Name: Homo sapiens]	Y	13	-	-	-	-	-	-	-	-	-	-
-	-	-	-	-	-	-	-	-	-	-	-	-	-	-	-	-	-	-	-	-	NP_001263388.1	NP_001263388	52.5	67.5	80	36	2	7	84	109	188	6e-20	91.7	IPR022084; IPR000418; IPR011991	Y	ELF2	9606 [Organism: human] [Scientific Name: Homo sapiens]	Y	13	-	-	-	-	-	-	-	-	-	-
-	-	-	-	-	-	-	-	-	-	-	-	-	-	-	-	-	-	-	-	-	NP_001263388.1	NP_001263388	52.5	67.5	80	36	2	7	84	109	188	6e-20	91.7	IPR022084; IPR000418; IPR011991	Y	ELF2	9606 [Organism: human] [Scientific Name: Homo sapiens]	Y	13	-	-	-	-	-	-	-	-	-	-
-	-	-	-	-	-	-	-	-	-	-	-	-	-	-	-	-	-	-	-	-	NP_001263388.1	NP_001263388	52.5	67.5	80	36	2	7	84	109	188	6e-20	91.7	IPR022084; IPR000418; IPR011991	Y	ELF2	9606 [Organism: human] [Scientific Name: Homo sapiens]	Y	13	-	-	-	-	-	-	-	-	-	-
-	-	-	-	-	-	-	-	-	-	-	-	-	-	-	-	-	-	-	-	-	NP_001263388.1	NP_001263388	52.5	67.5	80	36	2	7	84	109	188	6e-20	91.7	IPR022084; IPR000418; IPR011991	Y	ELF2	9606 [Organism: human] [Scientific Name: Homo sapiens]	Y	13	-	-	-	-	-	-	-	-	-	-
-	-	-	-	-	-	-	-	-	-	-	-	-	-	-	-	-	-	-	-	-	NP_001263388.1	NP_001263388	52.5	67.5	80	36	2	7	84	109	188	6e-20	91.7	IPR022084; IPR000418; IPR011991	Y	ELF2	9606 [Organism: human] [Scientific Name: Homo sapiens]	Y	13	-	-	-	-	-	-	-	-	-	-
-	-	-	-	-	-	-	-	-	-	-	-	-	-	-	-	-	-	-	-	-	NP_001263388.1	NP_001263388	52.5	67.5	80	36	2	7	84	109	188	6e-20	91.7	IPR022084; IPR000418; IPR011991	Y	ELF2	9606 [Organism: human] [Scientific Name: Homo sapiens]	Y	13	-	-	-	-	-	-	-	-	-	-
-	-	-	-	-	-	-	-	-	-	-	-	-	-	-	-	-	-	-	-	-	NP_001263388.1	NP_001263388	52.5	67.5	80	36	2	7	84	109	188	6e-20	91.7	IPR022084; IPR000418; IPR011991	Y	ELF2	9606 [Organism: human] [Scientific Name: Homo sapiens]	Y	13	-	-	-	-	-	-	-	-	-	-
-	-	-	-	-	-	-	-	-	-	-	-	-	-	-	-	-	-	-	-	-	NP_001263388.1	NP_001263388	52.5	67.5	80	36	2	7	84	109	188	6e-20	91.7	IPR022084; IPR000418; IPR011991	Y	ELF2	9606 [Organism: human] [Scientific Name: Homo sapiens]	Y	13	-	-	-	-	-	-	-	-	-	-
-	-	-	-	-	-	-	-	-	-	-	-	-	-	-	-	-	-	-	-	-	NP_001263388.1	NP_001263388	52.5	67.5	80	36	2	7	84	109	188	6e-20	91.7	IPR022084; IPR000418; IPR011991	Y	ELF2	9606 [Organism: human] [Scientific Name: Homo sapiens]	Y	13	-	-	-	-	-	-	-	-	-	-
-	-	-	-	-	-	-	-	-	-	-	-	-	-	-	-	-	-	-	-	-	NP_001263388.1	NP_001263388	52.5	67.5	80	36	2	7	84	109	188	6e-20	91.7	IPR022084; IPR000418; IPR011991	Y	ELF2	9606 [Organism: human] [Scientific Name: Homo sapiens]	Y	13	-	-	-	-	-	-	-	-	-	-
-	-	-	-	-	-	-	-	-	-	-	-	-	-	-	-	-	-	-	-	-	NP_001263388.1	NP_001263388	52.5	67.5	80	36	2	7	84	109	188	6e-20	91.7	IPR022084; IPR000418; IPR011991	Y	ELF2	9606 [Organism: human] [Scientific Name: Homo sapiens]	Y	13	-	-	-	-	-	-	-	-	-	-
-	-	-	-	-	-	-	-	-	-	-	-	-	-	-	-	-	-	-	-	-	NP_001263388.1	NP_001263388	52.5	67.5	80	36	2	7	84	109	188	6e-20	91.7	IPR022084; IPR000418; IPR011991	Y	ELF2	9606 [Organism: human] [Scientific Name: Homo sapiens]	Y	13	-	-	-	-	-	-	-	-	-	-
-	-	-	-	-	-	-	-	-	-	-	-	-	-	-	-	-	-	-	-	-	NP_001263388.1	NP_001263388	52.5	67.5	80	36	2	7	84	109	188	6e-20	91.7	IPR022084; IPR000418; IPR011991	Y	ELF2	9606 [Organism: human] [Scientific Name: Homo sapiens]	Y	13	-	-	-	-	-	-	-	-	-	-
-	-	-	-	-	-	-	-	-	-	-	-	-	-	-	-	-	-	-	-	-	NP_001263388.1	NP_001263388	52.5	67.5	80	36	2	7	84	109	188	6e-20	91.7	IPR022084; IPR000418; IPR011991	Y	ELF2	9606 [Organism: human] [Scientific Name: Homo sapiens]	Y	13	-	-	-	-	-	-	-	-	-	-
-	-	-	-	-	-	-	-	-	-	-	-	-	-	-	-	-	-	-	-	-	NP_001263388.1	NP_001263388	52.5	67.5	80	36	2	7	84	109	188	6e-20	91.7	IPR022084; IPR000418; IPR011991	Y	ELF2	9606 [Organism: human] [Scientific Name: Homo sapiens]	Y	13	-	-	-	-	-	-	-	-	-	-
-	-	-	-	-	-	-	-	-	-	-	-	-	-	-	-	-	-	-	-	-	NP_001263388.1	NP_001263388	52.5	67.5	80	36	2	7	84	109	188	6e-20	91.7	IPR022084; IPR000418; IPR011991	Y	ELF2	9606 [Organism: human] [Scientific Name: Homo sapiens]	Y	13	-	-	-	-	-	-	-	-	-	-
-	-	-	-	-	-	-	-	-	-	-	-	-	-	-	-	-	-	-	-	-	NP_001263388.1	NP_001263388	52.5	67.5	80	36	2	7	84	109	188	6e-20	91.7	IPR022084; IPR000418; IPR011991	Y	ELF2	9606 [Organism: human] [Scientific Name: Homo sapiens]	Y	13	-	-	-	-	-	-	-	-	-	-
-	-	-	-	-	-	-	-	-	-	-	-	-	-	-	-	-	-	-	-	-	NP_001263388.1	NP_001263388	52.5	67.5	80	36	2	7	84	109	188	6e-20	91.7	IPR022084; IPR000418; IPR011991	Y	ELF2	9606 [Organism: human] [Scientific Name: Homo sapiens]	Y	13	-	-	-	-	-	-	-	-	-	-
-	-	-	-	-	-	-	-	-	-	-	-	-	-	-	-	-	-	-	-	-	NP_001263388.1	NP_001263388	52.5	67.5	80	36	2	7	84	109	188	6e-20	91.7	IPR022084; IPR000418; IPR011991	Y	ELF2	9606 [Organism: human] [Scientific Name: Homo sapiens]	Y	13	-	-	-	-	-	-	-	-	-	-
-	-	-	-	-	-	-	-	-	-	-	-	-	-	-	-	-	-	-	-	-	NP_001263388.1	NP_001263388	52.5	67.5	80	36	2	7	84	109	188	6e-20	91.7	IPR022084; IPR000418; IPR011991	Y	ELF2	9606 [Organism: human] [Scientific Name: Homo sapiens]	Y	13	-	-	-	-	-	-	-	-	-	-
-	-	-	-	-	-	-	-	-	-	-	-	-	-	-	-	-	-	-	-	-	NP_001263388.1	NP_001263388	52.5	67.5	80	36	2	7	84	109	188	6e-20	91.7	IPR022084; IPR000418; IPR011991	Y	ELF2	9606 [Organism: human] [Scientific Name: Homo sapiens]	Y	13	-	-	-	-	-	-	-	-	-	-
-	-	-	-	-	-	-	-	-	-	-	-	-	-	-	-	-	-	-	-	-	NP_001263388.1	NP_001263388	52.5	67.5	80	36	2	7	84	109	188	6e-20	91.7	IPR022084; IPR000418; IPR011991	Y	ELF2	9606 [Organism: human] [Scientific Name: Homo sapiens]	Y	13	-	-	-	-	-	-	-	-	-	-
-	-	-	-	-	-	-	-	-	-	-	-	-	-	-	-	-	-	-	-	-	NP_001263388.1	NP_001263388	52.5	67.5	80	36	2	7	84	109	188	6e-20	91.7	IPR022084; IPR000418; IPR011991	Y	ELF2	9606 [Organism: human] [Scientific Name: Homo sapiens]	Y	13	-	-	-	-	-	-	-	-	-	-
-	-	-	-	-	-	-	-	-	-	-	-	-	-	-	-	-	-	-	-	-	NP_001263386.1	NP_001263386	52.5	67.5	80	36	2	7	84	121	200	6e-20	91.7	IPR022084; IPR000418; IPR011991	Y	ELF2	9606 [Organism: human] [Scientific Name: Homo sapiens]	Y	13	-	-	-	-	-	-	-	-	-	-
-	-	-	-	-	-	-	-	-	-	-	-	-	-	-	-	-	-	-	-	-	NP_001263386.1	NP_001263386	52.5	67.5	80	36	2	7	84	121	200	6e-20	91.7	IPR022084; IPR000418; IPR011991	Y	ELF2	9606 [Organism: human] [Scientific Name: Homo sapiens]	Y	13	-	-	-	-	-	-	-	-	-	-
-	-	-	-	-	-	-	-	-	-	-	-	-	-	-	-	-	-	-	-	-	NP_001263386.1	NP_001263386	52.5	67.5	80	36	2	7	84	121	200	6e-20	91.7	IPR022084; IPR000418; IPR011991	Y	ELF2	9606 [Organism: human] [Scientific Name: Homo sapiens]	Y	13	-	-	-	-	-	-	-	-	-	-
-	-	-	-	-	-	-	-	-	-	-	-	-	-	-	-	-	-	-	-	-	NP_001263386.1	NP_001263386	52.5	67.5	80	36	2	7	84	121	200	6e-20	91.7	IPR022084; IPR000418; IPR011991	Y	ELF2	9606 [Organism: human] [Scientific Name: Homo sapiens]	Y	13	-	-	-	-	-	-	-	-	-	-
-	-	-	-	-	-	-	-	-	-	-	-	-	-	-	-	-	-	-	-	-	NP_001263386.1	NP_001263386	52.5	67.5	80	36	2	7	84	121	200	6e-20	91.7	IPR022084; IPR000418; IPR011991	Y	ELF2	9606 [Organism: human] [Scientific Name: Homo sapiens]	Y	13	-	-	-	-	-	-	-	-	-	-
-	-	-	-	-	-	-	-	-	-	-	-	-	-	-	-	-	-	-	-	-	NP_001263386.1	NP_001263386	52.5	67.5	80	36	2	7	84	121	200	6e-20	91.7	IPR022084; IPR000418; IPR011991	Y	ELF2	9606 [Organism: human] [Scientific Name: Homo sapiens]	Y	13	-	-	-	-	-	-	-	-	-	-
-	-	-	-	-	-	-	-	-	-	-	-	-	-	-	-	-	-	-	-	-	NP_001263386.1	NP_001263386	52.5	67.5	80	36	2	7	84	121	200	6e-20	91.7	IPR022084; IPR000418; IPR011991	Y	ELF2	9606 [Organism: human] [Scientific Name: Homo sapiens]	Y	13	-	-	-	-	-	-	-	-	-	-
-	-	-	-	-	-	-	-	-	-	-	-	-	-	-	-	-	-	-	-	-	NP_001263386.1	NP_001263386	52.5	67.5	80	36	2	7	84	121	200	6e-20	91.7	IPR022084; IPR000418; IPR011991	Y	ELF2	9606 [Organism: human] [Scientific Name: Homo sapiens]	Y	13	-	-	-	-	-	-	-	-	-	-
-	-	-	-	-	-	-	-	-	-	-	-	-	-	-	-	-	-	-	-	-	NP_001263386.1	NP_001263386	52.5	67.5	80	36	2	7	84	121	200	6e-20	91.7	IPR022084; IPR000418; IPR011991	Y	ELF2	9606 [Organism: human] [Scientific Name: Homo sapiens]	Y	13	-	-	-	-	-	-	-	-	-	-
-	-	-	-	-	-	-	-	-	-	-	-	-	-	-	-	-	-	-	-	-	NP_001263386.1	NP_001263386	52.5	67.5	80	36	2	7	84	121	200	6e-20	91.7	IPR022084; IPR000418; IPR011991	Y	ELF2	9606 [Organism: human] [Scientific Name: Homo sapiens]	Y	13	-	-	-	-	-	-	-	-	-	-
-	-	-	-	-	-	-	-	-	-	-	-	-	-	-	-	-	-	-	-	-	NP_001263386.1	NP_001263386	52.5	67.5	80	36	2	7	84	121	200	6e-20	91.7	IPR022084; IPR000418; IPR011991	Y	ELF2	9606 [Organism: human] [Scientific Name: Homo sapiens]	Y	13	-	-	-	-	-	-	-	-	-	-
-	-	-	-	-	-	-	-	-	-	-	-	-	-	-	-	-	-	-	-	-	NP_001263386.1	NP_001263386	52.5	67.5	80	36	2	7	84	121	200	6e-20	91.7	IPR022084; IPR000418; IPR011991	Y	ELF2	9606 [Organism: human] [Scientific Name: Homo sapiens]	Y	13	-	-	-	-	-	-	-	-	-	-
-	-	-	-	-	-	-	-	-	-	-	-	-	-	-	-	-	-	-	-	-	NP_001263386.1	NP_001263386	52.5	67.5	80	36	2	7	84	121	200	6e-20	91.7	IPR022084; IPR000418; IPR011991	Y	ELF2	9606 [Organism: human] [Scientific Name: Homo sapiens]	Y	13	-	-	-	-	-	-	-	-	-	-
-	-	-	-	-	-	-	-	-	-	-	-	-	-	-	-	-	-	-	-	-	NP_001263386.1	NP_001263386	52.5	67.5	80	36	2	7	84	121	200	6e-20	91.7	IPR022084; IPR000418; IPR011991	Y	ELF2	9606 [Organism: human] [Scientific Name: Homo sapiens]	Y	13	-	-	-	-	-	-	-	-	-	-
-	-	-	-	-	-	-	-	-	-	-	-	-	-	-	-	-	-	-	-	-	NP_001263386.1	NP_001263386	52.5	67.5	80	36	2	7	84	121	200	6e-20	91.7	IPR022084; IPR000418; IPR011991	Y	ELF2	9606 [Organism: human] [Scientific Name: Homo sapiens]	Y	13	-	-	-	-	-	-	-	-	-	-
-	-	-	-	-	-	-	-	-	-	-	-	-	-	-	-	-	-	-	-	-	NP_001263386.1	NP_001263386	52.5	67.5	80	36	2	7	84	121	200	6e-20	91.7	IPR022084; IPR000418; IPR011991	Y	ELF2	9606 [Organism: human] [Scientific Name: Homo sapiens]	Y	13	-	-	-	-	-	-	-	-	-	-
-	-	-	-	-	-	-	-	-	-	-	-	-	-	-	-	-	-	-	-	-	NP_001263386.1	NP_001263386	52.5	67.5	80	36	2	7	84	121	200	6e-20	91.7	IPR022084; IPR000418; IPR011991	Y	ELF2	9606 [Organism: human] [Scientific Name: Homo sapiens]	Y	13	-	-	-	-	-	-	-	-	-	-
-	-	-	-	-	-	-	-	-	-	-	-	-	-	-	-	-	-	-	-	-	NP_001263386.1	NP_001263386	52.5	67.5	80	36	2	7	84	121	200	6e-20	91.7	IPR022084; IPR000418; IPR011991	Y	ELF2	9606 [Organism: human] [Scientific Name: Homo sapiens]	Y	13	-	-	-	-	-	-	-	-	-	-
-	-	-	-	-	-	-	-	-	-	-	-	-	-	-	-	-	-	-	-	-	NP_001263386.1	NP_001263386	52.5	67.5	80	36	2	7	84	121	200	6e-20	91.7	IPR022084; IPR000418; IPR011991	Y	ELF2	9606 [Organism: human] [Scientific Name: Homo sapiens]	Y	13	-	-	-	-	-	-	-	-	-	-
-	-	-	-	-	-	-	-	-	-	-	-	-	-	-	-	-	-	-	-	-	NP_001263386.1	NP_001263386	52.5	67.5	80	36	2	7	84	121	200	6e-20	91.7	IPR022084; IPR000418; IPR011991	Y	ELF2	9606 [Organism: human] [Scientific Name: Homo sapiens]	Y	13	-	-	-	-	-	-	-	-	-	-
-	-	-	-	-	-	-	-	-	-	-	-	-	-	-	-	-	-	-	-	-	NP_001263386.1	NP_001263386	52.5	67.5	80	36	2	7	84	121	200	6e-20	91.7	IPR022084; IPR000418; IPR011991	Y	ELF2	9606 [Organism: human] [Scientific Name: Homo sapiens]	Y	13	-	-	-	-	-	-	-	-	-	-
-	-	-	-	-	-	-	-	-	-	-	-	-	-	-	-	-	-	-	-	-	NP_001263386.1	NP_001263386	52.5	67.5	80	36	2	7	84	121	200	6e-20	91.7	IPR022084; IPR000418; IPR011991	Y	ELF2	9606 [Organism: human] [Scientific Name: Homo sapiens]	Y	13	-	-	-	-	-	-	-	-	-	-
-	-	-	-	-	-	-	-	-	-	-	-	-	-	-	-	-	-	-	-	-	NP_001263386.1	NP_001263386	52.5	67.5	80	36	2	7	84	121	200	6e-20	91.7	IPR022084; IPR000418; IPR011991	Y	ELF2	9606 [Organism: human] [Scientific Name: Homo sapiens]	Y	13	-	-	-	-	-	-	-	-	-	-
-	-	-	-	-	-	-	-	-	-	-	-	-	-	-	-	-	-	-	-	-	NP_001263386.1	NP_001263386	52.5	67.5	80	36	2	7	84	121	200	6e-20	91.7	IPR022084; IPR000418; IPR011991	Y	ELF2	9606 [Organism: human] [Scientific Name: Homo sapiens]	Y	13	-	-	-	-	-	-	-	-	-	-
-	-	-	-	-	-	-	-	-	-	-	-	-	-	-	-	-	-	-	-	-	NP_001263386.1	NP_001263386	52.5	67.5	80	36	2	7	84	121	200	6e-20	91.7	IPR022084; IPR000418; IPR011991	Y	ELF2	9606 [Organism: human] [Scientific Name: Homo sapiens]	Y	13	-	-	-	-	-	-	-	-	-	-
-	-	-	-	-	-	-	-	-	-	-	-	-	-	-	-	-	-	-	-	-	NP_001263386.1	NP_001263386	52.5	67.5	80	36	2	7	84	121	200	6e-20	91.7	IPR022084; IPR000418; IPR011991	Y	ELF2	9606 [Organism: human] [Scientific Name: Homo sapiens]	Y	13	-	-	-	-	-	-	-	-	-	-
-	-	-	-	-	-	-	-	-	-	-	-	-	-	-	-	-	-	-	-	-	NP_001263386.1	NP_001263386	52.5	67.5	80	36	2	7	84	121	200	6e-20	91.7	IPR022084; IPR000418; IPR011991	Y	ELF2	9606 [Organism: human] [Scientific Name: Homo sapiens]	Y	13	-	-	-	-	-	-	-	-	-	-
-	-	-	-	-	-	-	-	-	-	-	-	-	-	-	-	-	-	-	-	-	NP_001263386.1	NP_001263386	52.5	67.5	80	36	2	7	84	121	200	6e-20	91.7	IPR022084; IPR000418; IPR011991	Y	ELF2	9606 [Organism: human] [Scientific Name: Homo sapiens]	Y	13	-	-	-	-	-	-	-	-	-	-
-	-	-	-	-	-	-	-	-	-	-	-	-	-	-	-	-	-	-	-	-	NP_001263386.1	NP_001263386	52.5	67.5	80	36	2	7	84	121	200	6e-20	91.7	IPR022084; IPR000418; IPR011991	Y	ELF2	9606 [Organism: human] [Scientific Name: Homo sapiens]	Y	13	-	-	-	-	-	-	-	-	-	-
-	-	-	-	-	-	-	-	-	-	-	-	-	-	-	-	-	-	-	-	-	NP_001263386.1	NP_001263386	52.5	67.5	80	36	2	7	84	121	200	6e-20	91.7	IPR022084; IPR000418; IPR011991	Y	ELF2	9606 [Organism: human] [Scientific Name: Homo sapiens]	Y	13	-	-	-	-	-	-	-	-	-	-
-	-	-	-	-	-	-	-	-	-	-	-	-	-	-	-	-	-	-	-	-	NP_001263386.1	NP_001263386	52.5	67.5	80	36	2	7	84	121	200	6e-20	91.7	IPR022084; IPR000418; IPR011991	Y	ELF2	9606 [Organism: human] [Scientific Name: Homo sapiens]	Y	13	-	-	-	-	-	-	-	-	-	-
-	-	-	-	-	-	-	-	-	-	-	-	-	-	-	-	-	-	-	-	-	NP_001263386.1	NP_001263386	52.5	67.5	80	36	2	7	84	121	200	6e-20	91.7	IPR022084; IPR000418; IPR011991	Y	ELF2	9606 [Organism: human] [Scientific Name: Homo sapiens]	Y	13	-	-	-	-	-	-	-	-	-	-
-	-	-	-	-	-	-	-	-	-	-	-	-	-	-	-	-	-	-	-	-	NP_001263386.1	NP_001263386	52.5	67.5	80	36	2	7	84	121	200	6e-20	91.7	IPR022084; IPR000418; IPR011991	Y	ELF2	9606 [Organism: human] [Scientific Name: Homo sapiens]	Y	13	-	-	-	-	-	-	-	-	-	-
-	-	-	-	-	-	-	-	-	-	-	-	-	-	-	-	-	-	-	-	-	NP_001263386.1	NP_001263386	52.5	67.5	80	36	2	7	84	121	200	6e-20	91.7	IPR022084; IPR000418; IPR011991	Y	ELF2	9606 [Organism: human] [Scientific Name: Homo sapiens]	Y	13	-	-	-	-	-	-	-	-	-	-
-	-	-	-	-	-	-	-	-	-	-	-	-	-	-	-	-	-	-	-	-	NP_001263386.1	NP_001263386	52.5	67.5	80	36	2	7	84	121	200	6e-20	91.7	IPR022084; IPR000418; IPR011991	Y	ELF2	9606 [Organism: human] [Scientific Name: Homo sapiens]	Y	13	-	-	-	-	-	-	-	-	-	-
-	-	-	-	-	-	-	-	-	-	-	-	-	-	-	-	-	-	-	-	-	NP_001263386.1	NP_001263386	52.5	67.5	80	36	2	7	84	121	200	6e-20	91.7	IPR022084; IPR000418; IPR011991	Y	ELF2	9606 [Organism: human] [Scientific Name: Homo sapiens]	Y	13	-	-	-	-	-	-	-	-	-	-
-	-	-	-	-	-	-	-	-	-	-	-	-	-	-	-	-	-	-	-	-	NP_001263386.1	NP_001263386	52.5	67.5	80	36	2	7	84	121	200	6e-20	91.7	IPR022084; IPR000418; IPR011991	Y	ELF2	9606 [Organism: human] [Scientific Name: Homo sapiens]	Y	13	-	-	-	-	-	-	-	-	-	-
-	-	-	-	-	-	-	-	-	-	-	-	-	-	-	-	-	-	-	-	-	NP_001263387.1	NP_001263387	52.5	67.5	80	36	2	7	84	138	217	7e-20	91.7	IPR022084; IPR000418; IPR011991	Y	ELF2	9606 [Organism: human] [Scientific Name: Homo sapiens]	Y	13	-	-	-	-	-	-	-	-	-	-
-	-	-	-	-	-	-	-	-	-	-	-	-	-	-	-	-	-	-	-	-	NP_001263387.1	NP_001263387	52.5	67.5	80	36	2	7	84	138	217	7e-20	91.7	IPR022084; IPR000418; IPR011991	Y	ELF2	9606 [Organism: human] [Scientific Name: Homo sapiens]	Y	13	-	-	-	-	-	-	-	-	-	-
-	-	-	-	-	-	-	-	-	-	-	-	-	-	-	-	-	-	-	-	-	NP_001263387.1	NP_001263387	52.5	67.5	80	36	2	7	84	138	217	7e-20	91.7	IPR022084; IPR000418; IPR011991	Y	ELF2	9606 [Organism: human] [Scientific Name: Homo sapiens]	Y	13	-	-	-	-	-	-	-	-	-	-
-	-	-	-	-	-	-	-	-	-	-	-	-	-	-	-	-	-	-	-	-	NP_001263387.1	NP_001263387	52.5	67.5	80	36	2	7	84	138	217	7e-20	91.7	IPR022084; IPR000418; IPR011991	Y	ELF2	9606 [Organism: human] [Scientific Name: Homo sapiens]	Y	13	-	-	-	-	-	-	-	-	-	-
-	-	-	-	-	-	-	-	-	-	-	-	-	-	-	-	-	-	-	-	-	NP_001263387.1	NP_001263387	52.5	67.5	80	36	2	7	84	138	217	7e-20	91.7	IPR022084; IPR000418; IPR011991	Y	ELF2	9606 [Organism: human] [Scientific Name: Homo sapiens]	Y	13	-	-	-	-	-	-	-	-	-	-
-	-	-	-	-	-	-	-	-	-	-	-	-	-	-	-	-	-	-	-	-	NP_001263387.1	NP_001263387	52.5	67.5	80	36	2	7	84	138	217	7e-20	91.7	IPR022084; IPR000418; IPR011991	Y	ELF2	9606 [Organism: human] [Scientific Name: Homo sapiens]	Y	13	-	-	-	-	-	-	-	-	-	-
-	-	-	-	-	-	-	-	-	-	-	-	-	-	-	-	-	-	-	-	-	NP_001263387.1	NP_001263387	52.5	67.5	80	36	2	7	84	138	217	7e-20	91.7	IPR022084; IPR000418; IPR011991	Y	ELF2	9606 [Organism: human] [Scientific Name: Homo sapiens]	Y	13	-	-	-	-	-	-	-	-	-	-
-	-	-	-	-	-	-	-	-	-	-	-	-	-	-	-	-	-	-	-	-	NP_001263387.1	NP_001263387	52.5	67.5	80	36	2	7	84	138	217	7e-20	91.7	IPR022084; IPR000418; IPR011991	Y	ELF2	9606 [Organism: human] [Scientific Name: Homo sapiens]	Y	13	-	-	-	-	-	-	-	-	-	-
-	-	-	-	-	-	-	-	-	-	-	-	-	-	-	-	-	-	-	-	-	NP_001263387.1	NP_001263387	52.5	67.5	80	36	2	7	84	138	217	7e-20	91.7	IPR022084; IPR000418; IPR011991	Y	ELF2	9606 [Organism: human] [Scientific Name: Homo sapiens]	Y	13	-	-	-	-	-	-	-	-	-	-
-	-	-	-	-	-	-	-	-	-	-	-	-	-	-	-	-	-	-	-	-	NP_001263387.1	NP_001263387	52.5	67.5	80	36	2	7	84	138	217	7e-20	91.7	IPR022084; IPR000418; IPR011991	Y	ELF2	9606 [Organism: human] [Scientific Name: Homo sapiens]	Y	13	-	-	-	-	-	-	-	-	-	-
-	-	-	-	-	-	-	-	-	-	-	-	-	-	-	-	-	-	-	-	-	NP_001263387.1	NP_001263387	52.5	67.5	80	36	2	7	84	138	217	7e-20	91.7	IPR022084; IPR000418; IPR011991	Y	ELF2	9606 [Organism: human] [Scientific Name: Homo sapiens]	Y	13	-	-	-	-	-	-	-	-	-	-
-	-	-	-	-	-	-	-	-	-	-	-	-	-	-	-	-	-	-	-	-	NP_001263387.1	NP_001263387	52.5	67.5	80	36	2	7	84	138	217	7e-20	91.7	IPR022084; IPR000418; IPR011991	Y	ELF2	9606 [Organism: human] [Scientific Name: Homo sapiens]	Y	13	-	-	-	-	-	-	-	-	-	-
-	-	-	-	-	-	-	-	-	-	-	-	-	-	-	-	-	-	-	-	-	NP_001263387.1	NP_001263387	52.5	67.5	80	36	2	7	84	138	217	7e-20	91.7	IPR022084; IPR000418; IPR011991	Y	ELF2	9606 [Organism: human] [Scientific Name: Homo sapiens]	Y	13	-	-	-	-	-	-	-	-	-	-
-	-	-	-	-	-	-	-	-	-	-	-	-	-	-	-	-	-	-	-	-	NP_001263387.1	NP_001263387	52.5	67.5	80	36	2	7	84	138	217	7e-20	91.7	IPR022084; IPR000418; IPR011991	Y	ELF2	9606 [Organism: human] [Scientific Name: Homo sapiens]	Y	13	-	-	-	-	-	-	-	-	-	-
-	-	-	-	-	-	-	-	-	-	-	-	-	-	-	-	-	-	-	-	-	NP_001263387.1	NP_001263387	52.5	67.5	80	36	2	7	84	138	217	7e-20	91.7	IPR022084; IPR000418; IPR011991	Y	ELF2	9606 [Organism: human] [Scientific Name: Homo sapiens]	Y	13	-	-	-	-	-	-	-	-	-	-
-	-	-	-	-	-	-	-	-	-	-	-	-	-	-	-	-	-	-	-	-	NP_001263387.1	NP_001263387	52.5	67.5	80	36	2	7	84	138	217	7e-20	91.7	IPR022084; IPR000418; IPR011991	Y	ELF2	9606 [Organism: human] [Scientific Name: Homo sapiens]	Y	13	-	-	-	-	-	-	-	-	-	-
-	-	-	-	-	-	-	-	-	-	-	-	-	-	-	-	-	-	-	-	-	NP_001263387.1	NP_001263387	52.5	67.5	80	36	2	7	84	138	217	7e-20	91.7	IPR022084; IPR000418; IPR011991	Y	ELF2	9606 [Organism: human] [Scientific Name: Homo sapiens]	Y	13	-	-	-	-	-	-	-	-	-	-
-	-	-	-	-	-	-	-	-	-	-	-	-	-	-	-	-	-	-	-	-	NP_001263387.1	NP_001263387	52.5	67.5	80	36	2	7	84	138	217	7e-20	91.7	IPR022084; IPR000418; IPR011991	Y	ELF2	9606 [Organism: human] [Scientific Name: Homo sapiens]	Y	13	-	-	-	-	-	-	-	-	-	-
-	-	-	-	-	-	-	-	-	-	-	-	-	-	-	-	-	-	-	-	-	NP_001263387.1	NP_001263387	52.5	67.5	80	36	2	7	84	138	217	7e-20	91.7	IPR022084; IPR000418; IPR011991	Y	ELF2	9606 [Organism: human] [Scientific Name: Homo sapiens]	Y	13	-	-	-	-	-	-	-	-	-	-
-	-	-	-	-	-	-	-	-	-	-	-	-	-	-	-	-	-	-	-	-	NP_001263387.1	NP_001263387	52.5	67.5	80	36	2	7	84	138	217	7e-20	91.7	IPR022084; IPR000418; IPR011991	Y	ELF2	9606 [Organism: human] [Scientific Name: Homo sapiens]	Y	13	-	-	-	-	-	-	-	-	-	-
-	-	-	-	-	-	-	-	-	-	-	-	-	-	-	-	-	-	-	-	-	NP_001263387.1	NP_001263387	52.5	67.5	80	36	2	7	84	138	217	7e-20	91.7	IPR022084; IPR000418; IPR011991	Y	ELF2	9606 [Organism: human] [Scientific Name: Homo sapiens]	Y	13	-	-	-	-	-	-	-	-	-	-
-	-	-	-	-	-	-	-	-	-	-	-	-	-	-	-	-	-	-	-	-	NP_001263387.1	NP_001263387	52.5	67.5	80	36	2	7	84	138	217	7e-20	91.7	IPR022084; IPR000418; IPR011991	Y	ELF2	9606 [Organism: human] [Scientific Name: Homo sapiens]	Y	13	-	-	-	-	-	-	-	-	-	-
-	-	-	-	-	-	-	-	-	-	-	-	-	-	-	-	-	-	-	-	-	NP_001263387.1	NP_001263387	52.5	67.5	80	36	2	7	84	138	217	7e-20	91.7	IPR022084; IPR000418; IPR011991	Y	ELF2	9606 [Organism: human] [Scientific Name: Homo sapiens]	Y	13	-	-	-	-	-	-	-	-	-	-
-	-	-	-	-	-	-	-	-	-	-	-	-	-	-	-	-	-	-	-	-	NP_001263387.1	NP_001263387	52.5	67.5	80	36	2	7	84	138	217	7e-20	91.7	IPR022084; IPR000418; IPR011991	Y	ELF2	9606 [Organism: human] [Scientific Name: Homo sapiens]	Y	13	-	-	-	-	-	-	-	-	-	-
-	-	-	-	-	-	-	-	-	-	-	-	-	-	-	-	-	-	-	-	-	NP_001263387.1	NP_001263387	52.5	67.5	80	36	2	7	84	138	217	7e-20	91.7	IPR022084; IPR000418; IPR011991	Y	ELF2	9606 [Organism: human] [Scientific Name: Homo sapiens]	Y	13	-	-	-	-	-	-	-	-	-	-
-	-	-	-	-	-	-	-	-	-	-	-	-	-	-	-	-	-	-	-	-	NP_001263387.1	NP_001263387	52.5	67.5	80	36	2	7	84	138	217	7e-20	91.7	IPR022084; IPR000418; IPR011991	Y	ELF2	9606 [Organism: human] [Scientific Name: Homo sapiens]	Y	13	-	-	-	-	-	-	-	-	-	-
-	-	-	-	-	-	-	-	-	-	-	-	-	-	-	-	-	-	-	-	-	NP_001263387.1	NP_001263387	52.5	67.5	80	36	2	7	84	138	217	7e-20	91.7	IPR022084; IPR000418; IPR011991	Y	ELF2	9606 [Organism: human] [Scientific Name: Homo sapiens]	Y	13	-	-	-	-	-	-	-	-	-	-
-	-	-	-	-	-	-	-	-	-	-	-	-	-	-	-	-	-	-	-	-	NP_001263387.1	NP_001263387	52.5	67.5	80	36	2	7	84	138	217	7e-20	91.7	IPR022084; IPR000418; IPR011991	Y	ELF2	9606 [Organism: human] [Scientific Name: Homo sapiens]	Y	13	-	-	-	-	-	-	-	-	-	-
-	-	-	-	-	-	-	-	-	-	-	-	-	-	-	-	-	-	-	-	-	NP_001263387.1	NP_001263387	52.5	67.5	80	36	2	7	84	138	217	7e-20	91.7	IPR022084; IPR000418; IPR011991	Y	ELF2	9606 [Organism: human] [Scientific Name: Homo sapiens]	Y	13	-	-	-	-	-	-	-	-	-	-
-	-	-	-	-	-	-	-	-	-	-	-	-	-	-	-	-	-	-	-	-	NP_001263387.1	NP_001263387	52.5	67.5	80	36	2	7	84	138	217	7e-20	91.7	IPR022084; IPR000418; IPR011991	Y	ELF2	9606 [Organism: human] [Scientific Name: Homo sapiens]	Y	13	-	-	-	-	-	-	-	-	-	-
-	-	-	-	-	-	-	-	-	-	-	-	-	-	-	-	-	-	-	-	-	NP_001263387.1	NP_001263387	52.5	67.5	80	36	2	7	84	138	217	7e-20	91.7	IPR022084; IPR000418; IPR011991	Y	ELF2	9606 [Organism: human] [Scientific Name: Homo sapiens]	Y	13	-	-	-	-	-	-	-	-	-	-
-	-	-	-	-	-	-	-	-	-	-	-	-	-	-	-	-	-	-	-	-	NP_001263387.1	NP_001263387	52.5	67.5	80	36	2	7	84	138	217	7e-20	91.7	IPR022084; IPR000418; IPR011991	Y	ELF2	9606 [Organism: human] [Scientific Name: Homo sapiens]	Y	13	-	-	-	-	-	-	-	-	-	-
-	-	-	-	-	-	-	-	-	-	-	-	-	-	-	-	-	-	-	-	-	NP_001263387.1	NP_001263387	52.5	67.5	80	36	2	7	84	138	217	7e-20	91.7	IPR022084; IPR000418; IPR011991	Y	ELF2	9606 [Organism: human] [Scientific Name: Homo sapiens]	Y	13	-	-	-	-	-	-	-	-	-	-
-	-	-	-	-	-	-	-	-	-	-	-	-	-	-	-	-	-	-	-	-	NP_001263387.1	NP_001263387	52.5	67.5	80	36	2	7	84	138	217	7e-20	91.7	IPR022084; IPR000418; IPR011991	Y	ELF2	9606 [Organism: human] [Scientific Name: Homo sapiens]	Y	13	-	-	-	-	-	-	-	-	-	-
-	-	-	-	-	-	-	-	-	-	-	-	-	-	-	-	-	-	-	-	-	NP_001263387.1	NP_001263387	52.5	67.5	80	36	2	7	84	138	217	7e-20	91.7	IPR022084; IPR000418; IPR011991	Y	ELF2	9606 [Organism: human] [Scientific Name: Homo sapiens]	Y	13	-	-	-	-	-	-	-	-	-	-
-	-	-	-	-	-	-	-	-	-	-	-	-	-	-	-	-	-	-	-	-	NP_001263387.1	NP_001263387	52.5	67.5	80	36	2	7	84	138	217	7e-20	91.7	IPR022084; IPR000418; IPR011991	Y	ELF2	9606 [Organism: human] [Scientific Name: Homo sapiens]	Y	13	-	-	-	-	-	-	-	-	-	-
-	-	-	-	-	-	-	-	-	-	-	-	-	-	-	-	-	-	-	-	-	NP_001263387.1	NP_001263387	52.5	67.5	80	36	2	7	84	138	217	7e-20	91.7	IPR022084; IPR000418; IPR011991	Y	ELF2	9606 [Organism: human] [Scientific Name: Homo sapiens]	Y	13	-	-	-	-	-	-	-	-	-	-
-	-	-	-	-	-	-	-	-	-	-	-	-	-	-	-	-	-	-	-	-	NP_006865.1	NP_006865	52.5	67.5	80	36	2	7	84	150	229	7e-20	91.7	IPR022084; IPR000418; IPR011991	Y	ELF2	9606 [Organism: human] [Scientific Name: Homo sapiens]	Y	13	-	-	-	-	-	-	-	-	-	-
-	-	-	-	-	-	-	-	-	-	-	-	-	-	-	-	-	-	-	-	-	NP_006865.1	NP_006865	52.5	67.5	80	36	2	7	84	150	229	7e-20	91.7	IPR022084; IPR000418; IPR011991	Y	ELF2	9606 [Organism: human] [Scientific Name: Homo sapiens]	Y	13	-	-	-	-	-	-	-	-	-	-
-	-	-	-	-	-	-	-	-	-	-	-	-	-	-	-	-	-	-	-	-	NP_006865.1	NP_006865	52.5	67.5	80	36	2	7	84	150	229	7e-20	91.7	IPR022084; IPR000418; IPR011991	Y	ELF2	9606 [Organism: human] [Scientific Name: Homo sapiens]	Y	13	-	-	-	-	-	-	-	-	-	-
-	-	-	-	-	-	-	-	-	-	-	-	-	-	-	-	-	-	-	-	-	NP_006865.1	NP_006865	52.5	67.5	80	36	2	7	84	150	229	7e-20	91.7	IPR022084; IPR000418; IPR011991	Y	ELF2	9606 [Organism: human] [Scientific Name: Homo sapiens]	Y	13	-	-	-	-	-	-	-	-	-	-
-	-	-	-	-	-	-	-	-	-	-	-	-	-	-	-	-	-	-	-	-	NP_006865.1	NP_006865	52.5	67.5	80	36	2	7	84	150	229	7e-20	91.7	IPR022084; IPR000418; IPR011991	Y	ELF2	9606 [Organism: human] [Scientific Name: Homo sapiens]	Y	13	-	-	-	-	-	-	-	-	-	-
-	-	-	-	-	-	-	-	-	-	-	-	-	-	-	-	-	-	-	-	-	NP_006865.1	NP_006865	52.5	67.5	80	36	2	7	84	150	229	7e-20	91.7	IPR022084; IPR000418; IPR011991	Y	ELF2	9606 [Organism: human] [Scientific Name: Homo sapiens]	Y	13	-	-	-	-	-	-	-	-	-	-
-	-	-	-	-	-	-	-	-	-	-	-	-	-	-	-	-	-	-	-	-	NP_006865.1	NP_006865	52.5	67.5	80	36	2	7	84	150	229	7e-20	91.7	IPR022084; IPR000418; IPR011991	Y	ELF2	9606 [Organism: human] [Scientific Name: Homo sapiens]	Y	13	-	-	-	-	-	-	-	-	-	-
-	-	-	-	-	-	-	-	-	-	-	-	-	-	-	-	-	-	-	-	-	NP_006865.1	NP_006865	52.5	67.5	80	36	2	7	84	150	229	7e-20	91.7	IPR022084; IPR000418; IPR011991	Y	ELF2	9606 [Organism: human] [Scientific Name: Homo sapiens]	Y	13	-	-	-	-	-	-	-	-	-	-
-	-	-	-	-	-	-	-	-	-	-	-	-	-	-	-	-	-	-	-	-	NP_006865.1	NP_006865	52.5	67.5	80	36	2	7	84	150	229	7e-20	91.7	IPR022084; IPR000418; IPR011991	Y	ELF2	9606 [Organism: human] [Scientific Name: Homo sapiens]	Y	13	-	-	-	-	-	-	-	-	-	-
-	-	-	-	-	-	-	-	-	-	-	-	-	-	-	-	-	-	-	-	-	NP_006865.1	NP_006865	52.5	67.5	80	36	2	7	84	150	229	7e-20	91.7	IPR022084; IPR000418; IPR011991	Y	ELF2	9606 [Organism: human] [Scientific Name: Homo sapiens]	Y	13	-	-	-	-	-	-	-	-	-	-
-	-	-	-	-	-	-	-	-	-	-	-	-	-	-	-	-	-	-	-	-	NP_006865.1	NP_006865	52.5	67.5	80	36	2	7	84	150	229	7e-20	91.7	IPR022084; IPR000418; IPR011991	Y	ELF2	9606 [Organism: human] [Scientific Name: Homo sapiens]	Y	13	-	-	-	-	-	-	-	-	-	-
-	-	-	-	-	-	-	-	-	-	-	-	-	-	-	-	-	-	-	-	-	NP_006865.1	NP_006865	52.5	67.5	80	36	2	7	84	150	229	7e-20	91.7	IPR022084; IPR000418; IPR011991	Y	ELF2	9606 [Organism: human] [Scientific Name: Homo sapiens]	Y	13	-	-	-	-	-	-	-	-	-	-
-	-	-	-	-	-	-	-	-	-	-	-	-	-	-	-	-	-	-	-	-	NP_006865.1	NP_006865	52.5	67.5	80	36	2	7	84	150	229	7e-20	91.7	IPR022084; IPR000418; IPR011991	Y	ELF2	9606 [Organism: human] [Scientific Name: Homo sapiens]	Y	13	-	-	-	-	-	-	-	-	-	-
-	-	-	-	-	-	-	-	-	-	-	-	-	-	-	-	-	-	-	-	-	NP_006865.1	NP_006865	52.5	67.5	80	36	2	7	84	150	229	7e-20	91.7	IPR022084; IPR000418; IPR011991	Y	ELF2	9606 [Organism: human] [Scientific Name: Homo sapiens]	Y	13	-	-	-	-	-	-	-	-	-	-
-	-	-	-	-	-	-	-	-	-	-	-	-	-	-	-	-	-	-	-	-	NP_006865.1	NP_006865	52.5	67.5	80	36	2	7	84	150	229	7e-20	91.7	IPR022084; IPR000418; IPR011991	Y	ELF2	9606 [Organism: human] [Scientific Name: Homo sapiens]	Y	13	-	-	-	-	-	-	-	-	-	-
-	-	-	-	-	-	-	-	-	-	-	-	-	-	-	-	-	-	-	-	-	NP_006865.1	NP_006865	52.5	67.5	80	36	2	7	84	150	229	7e-20	91.7	IPR022084; IPR000418; IPR011991	Y	ELF2	9606 [Organism: human] [Scientific Name: Homo sapiens]	Y	13	-	-	-	-	-	-	-	-	-	-
-	-	-	-	-	-	-	-	-	-	-	-	-	-	-	-	-	-	-	-	-	NP_006865.1	NP_006865	52.5	67.5	80	36	2	7	84	150	229	7e-20	91.7	IPR022084; IPR000418; IPR011991	Y	ELF2	9606 [Organism: human] [Scientific Name: Homo sapiens]	Y	13	-	-	-	-	-	-	-	-	-	-
-	-	-	-	-	-	-	-	-	-	-	-	-	-	-	-	-	-	-	-	-	NP_006865.1	NP_006865	52.5	67.5	80	36	2	7	84	150	229	7e-20	91.7	IPR022084; IPR000418; IPR011991	Y	ELF2	9606 [Organism: human] [Scientific Name: Homo sapiens]	Y	13	-	-	-	-	-	-	-	-	-	-
-	-	-	-	-	-	-	-	-	-	-	-	-	-	-	-	-	-	-	-	-	NP_006865.1	NP_006865	52.5	67.5	80	36	2	7	84	150	229	7e-20	91.7	IPR022084; IPR000418; IPR011991	Y	ELF2	9606 [Organism: human] [Scientific Name: Homo sapiens]	Y	13	-	-	-	-	-	-	-	-	-	-
-	-	-	-	-	-	-	-	-	-	-	-	-	-	-	-	-	-	-	-	-	NP_006865.1	NP_006865	52.5	67.5	80	36	2	7	84	150	229	7e-20	91.7	IPR022084; IPR000418; IPR011991	Y	ELF2	9606 [Organism: human] [Scientific Name: Homo sapiens]	Y	13	-	-	-	-	-	-	-	-	-	-
-	-	-	-	-	-	-	-	-	-	-	-	-	-	-	-	-	-	-	-	-	NP_006865.1	NP_006865	52.5	67.5	80	36	2	7	84	150	229	7e-20	91.7	IPR022084; IPR000418; IPR011991	Y	ELF2	9606 [Organism: human] [Scientific Name: Homo sapiens]	Y	13	-	-	-	-	-	-	-	-	-	-
-	-	-	-	-	-	-	-	-	-	-	-	-	-	-	-	-	-	-	-	-	NP_006865.1	NP_006865	52.5	67.5	80	36	2	7	84	150	229	7e-20	91.7	IPR022084; IPR000418; IPR011991	Y	ELF2	9606 [Organism: human] [Scientific Name: Homo sapiens]	Y	13	-	-	-	-	-	-	-	-	-	-
-	-	-	-	-	-	-	-	-	-	-	-	-	-	-	-	-	-	-	-	-	NP_006865.1	NP_006865	52.5	67.5	80	36	2	7	84	150	229	7e-20	91.7	IPR022084; IPR000418; IPR011991	Y	ELF2	9606 [Organism: human] [Scientific Name: Homo sapiens]	Y	13	-	-	-	-	-	-	-	-	-	-
-	-	-	-	-	-	-	-	-	-	-	-	-	-	-	-	-	-	-	-	-	NP_006865.1	NP_006865	52.5	67.5	80	36	2	7	84	150	229	7e-20	91.7	IPR022084; IPR000418; IPR011991	Y	ELF2	9606 [Organism: human] [Scientific Name: Homo sapiens]	Y	13	-	-	-	-	-	-	-	-	-	-
-	-	-	-	-	-	-	-	-	-	-	-	-	-	-	-	-	-	-	-	-	NP_006865.1	NP_006865	52.5	67.5	80	36	2	7	84	150	229	7e-20	91.7	IPR022084; IPR000418; IPR011991	Y	ELF2	9606 [Organism: human] [Scientific Name: Homo sapiens]	Y	13	-	-	-	-	-	-	-	-	-	-
-	-	-	-	-	-	-	-	-	-	-	-	-	-	-	-	-	-	-	-	-	NP_006865.1	NP_006865	52.5	67.5	80	36	2	7	84	150	229	7e-20	91.7	IPR022084; IPR000418; IPR011991	Y	ELF2	9606 [Organism: human] [Scientific Name: Homo sapiens]	Y	13	-	-	-	-	-	-	-	-	-	-
-	-	-	-	-	-	-	-	-	-	-	-	-	-	-	-	-	-	-	-	-	NP_006865.1	NP_006865	52.5	67.5	80	36	2	7	84	150	229	7e-20	91.7	IPR022084; IPR000418; IPR011991	Y	ELF2	9606 [Organism: human] [Scientific Name: Homo sapiens]	Y	13	-	-	-	-	-	-	-	-	-	-
-	-	-	-	-	-	-	-	-	-	-	-	-	-	-	-	-	-	-	-	-	NP_006865.1	NP_006865	52.5	67.5	80	36	2	7	84	150	229	7e-20	91.7	IPR022084; IPR000418; IPR011991	Y	ELF2	9606 [Organism: human] [Scientific Name: Homo sapiens]	Y	13	-	-	-	-	-	-	-	-	-	-
-	-	-	-	-	-	-	-	-	-	-	-	-	-	-	-	-	-	-	-	-	NP_006865.1	NP_006865	52.5	67.5	80	36	2	7	84	150	229	7e-20	91.7	IPR022084; IPR000418; IPR011991	Y	ELF2	9606 [Organism: human] [Scientific Name: Homo sapiens]	Y	13	-	-	-	-	-	-	-	-	-	-
-	-	-	-	-	-	-	-	-	-	-	-	-	-	-	-	-	-	-	-	-	NP_006865.1	NP_006865	52.5	67.5	80	36	2	7	84	150	229	7e-20	91.7	IPR022084; IPR000418; IPR011991	Y	ELF2	9606 [Organism: human] [Scientific Name: Homo sapiens]	Y	13	-	-	-	-	-	-	-	-	-	-
-	-	-	-	-	-	-	-	-	-	-	-	-	-	-	-	-	-	-	-	-	NP_006865.1	NP_006865	52.5	67.5	80	36	2	7	84	150	229	7e-20	91.7	IPR022084; IPR000418; IPR011991	Y	ELF2	9606 [Organism: human] [Scientific Name: Homo sapiens]	Y	13	-	-	-	-	-	-	-	-	-	-
-	-	-	-	-	-	-	-	-	-	-	-	-	-	-	-	-	-	-	-	-	NP_006865.1	NP_006865	52.5	67.5	80	36	2	7	84	150	229	7e-20	91.7	IPR022084; IPR000418; IPR011991	Y	ELF2	9606 [Organism: human] [Scientific Name: Homo sapiens]	Y	13	-	-	-	-	-	-	-	-	-	-
-	-	-	-	-	-	-	-	-	-	-	-	-	-	-	-	-	-	-	-	-	NP_006865.1	NP_006865	52.5	67.5	80	36	2	7	84	150	229	7e-20	91.7	IPR022084; IPR000418; IPR011991	Y	ELF2	9606 [Organism: human] [Scientific Name: Homo sapiens]	Y	13	-	-	-	-	-	-	-	-	-	-
-	-	-	-	-	-	-	-	-	-	-	-	-	-	-	-	-	-	-	-	-	NP_006865.1	NP_006865	52.5	67.5	80	36	2	7	84	150	229	7e-20	91.7	IPR022084; IPR000418; IPR011991	Y	ELF2	9606 [Organism: human] [Scientific Name: Homo sapiens]	Y	13	-	-	-	-	-	-	-	-	-	-
-	-	-	-	-	-	-	-	-	-	-	-	-	-	-	-	-	-	-	-	-	NP_006865.1	NP_006865	52.5	67.5	80	36	2	7	84	150	229	7e-20	91.7	IPR022084; IPR000418; IPR011991	Y	ELF2	9606 [Organism: human] [Scientific Name: Homo sapiens]	Y	13	-	-	-	-	-	-	-	-	-	-
-	-	-	-	-	-	-	-	-	-	-	-	-	-	-	-	-	-	-	-	-	NP_006865.1	NP_006865	52.5	67.5	80	36	2	7	84	150	229	7e-20	91.7	IPR022084; IPR000418; IPR011991	Y	ELF2	9606 [Organism: human] [Scientific Name: Homo sapiens]	Y	13	-	-	-	-	-	-	-	-	-	-
-	-	-	-	-	-	-	-	-	-	-	-	-	-	-	-	-	-	-	-	-	NP_006865.1	NP_006865	52.5	67.5	80	36	2	7	84	150	229	7e-20	91.7	IPR022084; IPR000418; IPR011991	Y	ELF2	9606 [Organism: human] [Scientific Name: Homo sapiens]	Y	13	-	-	-	-	-	-	-	-	-	-
-	-	-	-	-	-	-	-	-	-	-	-	-	-	-	-	-	-	-	-	-	NP_973728.1	NP_973728	52.5	67.5	80	36	2	7	84	198	277	9e-20	91.7	IPR022084; IPR000418; IPR011991	Y	ELF2	9606 [Organism: human] [Scientific Name: Homo sapiens]	Y	13	-	-	-	-	-	-	-	-	-	-
-	-	-	-	-	-	-	-	-	-	-	-	-	-	-	-	-	-	-	-	-	NP_973728.1	NP_973728	52.5	67.5	80	36	2	7	84	198	277	9e-20	91.7	IPR022084; IPR000418; IPR011991	Y	ELF2	9606 [Organism: human] [Scientific Name: Homo sapiens]	Y	13	-	-	-	-	-	-	-	-	-	-
-	-	-	-	-	-	-	-	-	-	-	-	-	-	-	-	-	-	-	-	-	NP_973728.1	NP_973728	52.5	67.5	80	36	2	7	84	198	277	9e-20	91.7	IPR022084; IPR000418; IPR011991	Y	ELF2	9606 [Organism: human] [Scientific Name: Homo sapiens]	Y	13	-	-	-	-	-	-	-	-	-	-
-	-	-	-	-	-	-	-	-	-	-	-	-	-	-	-	-	-	-	-	-	NP_973728.1	NP_973728	52.5	67.5	80	36	2	7	84	198	277	9e-20	91.7	IPR022084; IPR000418; IPR011991	Y	ELF2	9606 [Organism: human] [Scientific Name: Homo sapiens]	Y	13	-	-	-	-	-	-	-	-	-	-
-	-	-	-	-	-	-	-	-	-	-	-	-	-	-	-	-	-	-	-	-	NP_973728.1	NP_973728	52.5	67.5	80	36	2	7	84	198	277	9e-20	91.7	IPR022084; IPR000418; IPR011991	Y	ELF2	9606 [Organism: human] [Scientific Name: Homo sapiens]	Y	13	-	-	-	-	-	-	-	-	-	-
-	-	-	-	-	-	-	-	-	-	-	-	-	-	-	-	-	-	-	-	-	NP_973728.1	NP_973728	52.5	67.5	80	36	2	7	84	198	277	9e-20	91.7	IPR022084; IPR000418; IPR011991	Y	ELF2	9606 [Organism: human] [Scientific Name: Homo sapiens]	Y	13	-	-	-	-	-	-	-	-	-	-
-	-	-	-	-	-	-	-	-	-	-	-	-	-	-	-	-	-	-	-	-	NP_973728.1	NP_973728	52.5	67.5	80	36	2	7	84	198	277	9e-20	91.7	IPR022084; IPR000418; IPR011991	Y	ELF2	9606 [Organism: human] [Scientific Name: Homo sapiens]	Y	13	-	-	-	-	-	-	-	-	-	-
-	-	-	-	-	-	-	-	-	-	-	-	-	-	-	-	-	-	-	-	-	NP_973728.1	NP_973728	52.5	67.5	80	36	2	7	84	198	277	9e-20	91.7	IPR022084; IPR000418; IPR011991	Y	ELF2	9606 [Organism: human] [Scientific Name: Homo sapiens]	Y	13	-	-	-	-	-	-	-	-	-	-
-	-	-	-	-	-	-	-	-	-	-	-	-	-	-	-	-	-	-	-	-	NP_973728.1	NP_973728	52.5	67.5	80	36	2	7	84	198	277	9e-20	91.7	IPR022084; IPR000418; IPR011991	Y	ELF2	9606 [Organism: human] [Scientific Name: Homo sapiens]	Y	13	-	-	-	-	-	-	-	-	-	-
-	-	-	-	-	-	-	-	-	-	-	-	-	-	-	-	-	-	-	-	-	NP_973728.1	NP_973728	52.5	67.5	80	36	2	7	84	198	277	9e-20	91.7	IPR022084; IPR000418; IPR011991	Y	ELF2	9606 [Organism: human] [Scientific Name: Homo sapiens]	Y	13	-	-	-	-	-	-	-	-	-	-
-	-	-	-	-	-	-	-	-	-	-	-	-	-	-	-	-	-	-	-	-	NP_973728.1	NP_973728	52.5	67.5	80	36	2	7	84	198	277	9e-20	91.7	IPR022084; IPR000418; IPR011991	Y	ELF2	9606 [Organism: human] [Scientific Name: Homo sapiens]	Y	13	-	-	-	-	-	-	-	-	-	-
-	-	-	-	-	-	-	-	-	-	-	-	-	-	-	-	-	-	-	-	-	NP_973728.1	NP_973728	52.5	67.5	80	36	2	7	84	198	277	9e-20	91.7	IPR022084; IPR000418; IPR011991	Y	ELF2	9606 [Organism: human] [Scientific Name: Homo sapiens]	Y	13	-	-	-	-	-	-	-	-	-	-
-	-	-	-	-	-	-	-	-	-	-	-	-	-	-	-	-	-	-	-	-	NP_973728.1	NP_973728	52.5	67.5	80	36	2	7	84	198	277	9e-20	91.7	IPR022084; IPR000418; IPR011991	Y	ELF2	9606 [Organism: human] [Scientific Name: Homo sapiens]	Y	13	-	-	-	-	-	-	-	-	-	-
-	-	-	-	-	-	-	-	-	-	-	-	-	-	-	-	-	-	-	-	-	NP_973728.1	NP_973728	52.5	67.5	80	36	2	7	84	198	277	9e-20	91.7	IPR022084; IPR000418; IPR011991	Y	ELF2	9606 [Organism: human] [Scientific Name: Homo sapiens]	Y	13	-	-	-	-	-	-	-	-	-	-
-	-	-	-	-	-	-	-	-	-	-	-	-	-	-	-	-	-	-	-	-	NP_973728.1	NP_973728	52.5	67.5	80	36	2	7	84	198	277	9e-20	91.7	IPR022084; IPR000418; IPR011991	Y	ELF2	9606 [Organism: human] [Scientific Name: Homo sapiens]	Y	13	-	-	-	-	-	-	-	-	-	-
-	-	-	-	-	-	-	-	-	-	-	-	-	-	-	-	-	-	-	-	-	NP_973728.1	NP_973728	52.5	67.5	80	36	2	7	84	198	277	9e-20	91.7	IPR022084; IPR000418; IPR011991	Y	ELF2	9606 [Organism: human] [Scientific Name: Homo sapiens]	Y	13	-	-	-	-	-	-	-	-	-	-
-	-	-	-	-	-	-	-	-	-	-	-	-	-	-	-	-	-	-	-	-	NP_973728.1	NP_973728	52.5	67.5	80	36	2	7	84	198	277	9e-20	91.7	IPR022084; IPR000418; IPR011991	Y	ELF2	9606 [Organism: human] [Scientific Name: Homo sapiens]	Y	13	-	-	-	-	-	-	-	-	-	-
-	-	-	-	-	-	-	-	-	-	-	-	-	-	-	-	-	-	-	-	-	NP_973728.1	NP_973728	52.5	67.5	80	36	2	7	84	198	277	9e-20	91.7	IPR022084; IPR000418; IPR011991	Y	ELF2	9606 [Organism: human] [Scientific Name: Homo sapiens]	Y	13	-	-	-	-	-	-	-	-	-	-
-	-	-	-	-	-	-	-	-	-	-	-	-	-	-	-	-	-	-	-	-	NP_973728.1	NP_973728	52.5	67.5	80	36	2	7	84	198	277	9e-20	91.7	IPR022084; IPR000418; IPR011991	Y	ELF2	9606 [Organism: human] [Scientific Name: Homo sapiens]	Y	13	-	-	-	-	-	-	-	-	-	-
-	-	-	-	-	-	-	-	-	-	-	-	-	-	-	-	-	-	-	-	-	NP_973728.1	NP_973728	52.5	67.5	80	36	2	7	84	198	277	9e-20	91.7	IPR022084; IPR000418; IPR011991	Y	ELF2	9606 [Organism: human] [Scientific Name: Homo sapiens]	Y	13	-	-	-	-	-	-	-	-	-	-
-	-	-	-	-	-	-	-	-	-	-	-	-	-	-	-	-	-	-	-	-	NP_973728.1	NP_973728	52.5	67.5	80	36	2	7	84	198	277	9e-20	91.7	IPR022084; IPR000418; IPR011991	Y	ELF2	9606 [Organism: human] [Scientific Name: Homo sapiens]	Y	13	-	-	-	-	-	-	-	-	-	-
-	-	-	-	-	-	-	-	-	-	-	-	-	-	-	-	-	-	-	-	-	NP_973728.1	NP_973728	52.5	67.5	80	36	2	7	84	198	277	9e-20	91.7	IPR022084; IPR000418; IPR011991	Y	ELF2	9606 [Organism: human] [Scientific Name: Homo sapiens]	Y	13	-	-	-	-	-	-	-	-	-	-
-	-	-	-	-	-	-	-	-	-	-	-	-	-	-	-	-	-	-	-	-	NP_973728.1	NP_973728	52.5	67.5	80	36	2	7	84	198	277	9e-20	91.7	IPR022084; IPR000418; IPR011991	Y	ELF2	9606 [Organism: human] [Scientific Name: Homo sapiens]	Y	13	-	-	-	-	-	-	-	-	-	-
-	-	-	-	-	-	-	-	-	-	-	-	-	-	-	-	-	-	-	-	-	NP_973728.1	NP_973728	52.5	67.5	80	36	2	7	84	198	277	9e-20	91.7	IPR022084; IPR000418; IPR011991	Y	ELF2	9606 [Organism: human] [Scientific Name: Homo sapiens]	Y	13	-	-	-	-	-	-	-	-	-	-
-	-	-	-	-	-	-	-	-	-	-	-	-	-	-	-	-	-	-	-	-	NP_973728.1	NP_973728	52.5	67.5	80	36	2	7	84	198	277	9e-20	91.7	IPR022084; IPR000418; IPR011991	Y	ELF2	9606 [Organism: human] [Scientific Name: Homo sapiens]	Y	13	-	-	-	-	-	-	-	-	-	-
-	-	-	-	-	-	-	-	-	-	-	-	-	-	-	-	-	-	-	-	-	NP_973728.1	NP_973728	52.5	67.5	80	36	2	7	84	198	277	9e-20	91.7	IPR022084; IPR000418; IPR011991	Y	ELF2	9606 [Organism: human] [Scientific Name: Homo sapiens]	Y	13	-	-	-	-	-	-	-	-	-	-
-	-	-	-	-	-	-	-	-	-	-	-	-	-	-	-	-	-	-	-	-	NP_973728.1	NP_973728	52.5	67.5	80	36	2	7	84	198	277	9e-20	91.7	IPR022084; IPR000418; IPR011991	Y	ELF2	9606 [Organism: human] [Scientific Name: Homo sapiens]	Y	13	-	-	-	-	-	-	-	-	-	-
-	-	-	-	-	-	-	-	-	-	-	-	-	-	-	-	-	-	-	-	-	NP_973728.1	NP_973728	52.5	67.5	80	36	2	7	84	198	277	9e-20	91.7	IPR022084; IPR000418; IPR011991	Y	ELF2	9606 [Organism: human] [Scientific Name: Homo sapiens]	Y	13	-	-	-	-	-	-	-	-	-	-
-	-	-	-	-	-	-	-	-	-	-	-	-	-	-	-	-	-	-	-	-	NP_973728.1	NP_973728	52.5	67.5	80	36	2	7	84	198	277	9e-20	91.7	IPR022084; IPR000418; IPR011991	Y	ELF2	9606 [Organism: human] [Scientific Name: Homo sapiens]	Y	13	-	-	-	-	-	-	-	-	-	-
-	-	-	-	-	-	-	-	-	-	-	-	-	-	-	-	-	-	-	-	-	NP_973728.1	NP_973728	52.5	67.5	80	36	2	7	84	198	277	9e-20	91.7	IPR022084; IPR000418; IPR011991	Y	ELF2	9606 [Organism: human] [Scientific Name: Homo sapiens]	Y	13	-	-	-	-	-	-	-	-	-	-
-	-	-	-	-	-	-	-	-	-	-	-	-	-	-	-	-	-	-	-	-	NP_973728.1	NP_973728	52.5	67.5	80	36	2	7	84	198	277	9e-20	91.7	IPR022084; IPR000418; IPR011991	Y	ELF2	9606 [Organism: human] [Scientific Name: Homo sapiens]	Y	13	-	-	-	-	-	-	-	-	-	-
-	-	-	-	-	-	-	-	-	-	-	-	-	-	-	-	-	-	-	-	-	NP_973728.1	NP_973728	52.5	67.5	80	36	2	7	84	198	277	9e-20	91.7	IPR022084; IPR000418; IPR011991	Y	ELF2	9606 [Organism: human] [Scientific Name: Homo sapiens]	Y	13	-	-	-	-	-	-	-	-	-	-
-	-	-	-	-	-	-	-	-	-	-	-	-	-	-	-	-	-	-	-	-	NP_973728.1	NP_973728	52.5	67.5	80	36	2	7	84	198	277	9e-20	91.7	IPR022084; IPR000418; IPR011991	Y	ELF2	9606 [Organism: human] [Scientific Name: Homo sapiens]	Y	13	-	-	-	-	-	-	-	-	-	-
-	-	-	-	-	-	-	-	-	-	-	-	-	-	-	-	-	-	-	-	-	NP_973728.1	NP_973728	52.5	67.5	80	36	2	7	84	198	277	9e-20	91.7	IPR022084; IPR000418; IPR011991	Y	ELF2	9606 [Organism: human] [Scientific Name: Homo sapiens]	Y	13	-	-	-	-	-	-	-	-	-	-
-	-	-	-	-	-	-	-	-	-	-	-	-	-	-	-	-	-	-	-	-	NP_973728.1	NP_973728	52.5	67.5	80	36	2	7	84	198	277	9e-20	91.7	IPR022084; IPR000418; IPR011991	Y	ELF2	9606 [Organism: human] [Scientific Name: Homo sapiens]	Y	13	-	-	-	-	-	-	-	-	-	-
-	-	-	-	-	-	-	-	-	-	-	-	-	-	-	-	-	-	-	-	-	NP_973728.1	NP_973728	52.5	67.5	80	36	2	7	84	198	277	9e-20	91.7	IPR022084; IPR000418; IPR011991	Y	ELF2	9606 [Organism: human] [Scientific Name: Homo sapiens]	Y	13	-	-	-	-	-	-	-	-	-	-
-	-	-	-	-	-	-	-	-	-	-	-	-	-	-	-	-	-	-	-	-	NP_973728.1	NP_973728	52.5	67.5	80	36	2	7	84	198	277	9e-20	91.7	IPR022084; IPR000418; IPR011991	Y	ELF2	9606 [Organism: human] [Scientific Name: Homo sapiens]	Y	13	-	-	-	-	-	-	-	-	-	-
-	-	-	-	-	-	-	-	-	-	-	-	-	-	-	-	-	-	-	-	-	NP_001412.1	NP_001412	51.22	67.07	82	38	2	5	84	209	290	1e-19	91.7	IPR011991; IPR000418; IPR022084	Y	ELF4	9606 [Organism: human] [Scientific Name: Homo sapiens]	Y	13	-	-	-	-	-	-	-	-	-	-
-	-	-	-	-	-	-	-	-	-	-	-	-	-	-	-	-	-	-	-	-	NP_001412.1	NP_001412	51.22	67.07	82	38	2	5	84	209	290	1e-19	91.7	IPR011991; IPR000418; IPR022084	Y	ELF4	9606 [Organism: human] [Scientific Name: Homo sapiens]	Y	13	-	-	-	-	-	-	-	-	-	-
-	-	-	-	-	-	-	-	-	-	-	-	-	-	-	-	-	-	-	-	-	NP_001412.1	NP_001412	51.22	67.07	82	38	2	5	84	209	290	1e-19	91.7	IPR011991; IPR000418; IPR022084	Y	ELF4	9606 [Organism: human] [Scientific Name: Homo sapiens]	Y	13	-	-	-	-	-	-	-	-	-	-
-	-	-	-	-	-	-	-	-	-	-	-	-	-	-	-	-	-	-	-	-	NP_001412.1	NP_001412	51.22	67.07	82	38	2	5	84	209	290	1e-19	91.7	IPR011991; IPR000418; IPR022084	Y	ELF4	9606 [Organism: human] [Scientific Name: Homo sapiens]	Y	13	-	-	-	-	-	-	-	-	-	-
-	-	-	-	-	-	-	-	-	-	-	-	-	-	-	-	-	-	-	-	-	NP_001412.1	NP_001412	51.22	67.07	82	38	2	5	84	209	290	1e-19	91.7	IPR011991; IPR000418; IPR022084	Y	ELF4	9606 [Organism: human] [Scientific Name: Homo sapiens]	Y	13	-	-	-	-	-	-	-	-	-	-
-	-	-	-	-	-	-	-	-	-	-	-	-	-	-	-	-	-	-	-	-	NP_001412.1	NP_001412	51.22	67.07	82	38	2	5	84	209	290	1e-19	91.7	IPR011991; IPR000418; IPR022084	Y	ELF4	9606 [Organism: human] [Scientific Name: Homo sapiens]	Y	13	-	-	-	-	-	-	-	-	-	-
-	-	-	-	-	-	-	-	-	-	-	-	-	-	-	-	-	-	-	-	-	NP_001412.1	NP_001412	51.22	67.07	82	38	2	5	84	209	290	1e-19	91.7	IPR011991; IPR000418; IPR022084	Y	ELF4	9606 [Organism: human] [Scientific Name: Homo sapiens]	Y	13	-	-	-	-	-	-	-	-	-	-
-	-	-	-	-	-	-	-	-	-	-	-	-	-	-	-	-	-	-	-	-	NP_001412.1	NP_001412	51.22	67.07	82	38	2	5	84	209	290	1e-19	91.7	IPR011991; IPR000418; IPR022084	Y	ELF4	9606 [Organism: human] [Scientific Name: Homo sapiens]	Y	13	-	-	-	-	-	-	-	-	-	-
-	-	-	-	-	-	-	-	-	-	-	-	-	-	-	-	-	-	-	-	-	NP_001412.1	NP_001412	51.22	67.07	82	38	2	5	84	209	290	1e-19	91.7	IPR011991; IPR000418; IPR022084	Y	ELF4	9606 [Organism: human] [Scientific Name: Homo sapiens]	Y	13	-	-	-	-	-	-	-	-	-	-
-	-	-	-	-	-	-	-	-	-	-	-	-	-	-	-	-	-	-	-	-	NP_001412.1	NP_001412	51.22	67.07	82	38	2	5	84	209	290	1e-19	91.7	IPR011991; IPR000418; IPR022084	Y	ELF4	9606 [Organism: human] [Scientific Name: Homo sapiens]	Y	13	-	-	-	-	-	-	-	-	-	-
-	-	-	-	-	-	-	-	-	-	-	-	-	-	-	-	-	-	-	-	-	NP_001412.1	NP_001412	51.22	67.07	82	38	2	5	84	209	290	1e-19	91.7	IPR011991; IPR000418; IPR022084	Y	ELF4	9606 [Organism: human] [Scientific Name: Homo sapiens]	Y	13	-	-	-	-	-	-	-	-	-	-
-	-	-	-	-	-	-	-	-	-	-	-	-	-	-	-	-	-	-	-	-	NP_001412.1	NP_001412	51.22	67.07	82	38	2	5	84	209	290	1e-19	91.7	IPR011991; IPR000418; IPR022084	Y	ELF4	9606 [Organism: human] [Scientific Name: Homo sapiens]	Y	13	-	-	-	-	-	-	-	-	-	-
-	-	-	-	-	-	-	-	-	-	-	-	-	-	-	-	-	-	-	-	-	NP_001412.1	NP_001412	51.22	67.07	82	38	2	5	84	209	290	1e-19	91.7	IPR011991; IPR000418; IPR022084	Y	ELF4	9606 [Organism: human] [Scientific Name: Homo sapiens]	Y	13	-	-	-	-	-	-	-	-	-	-
-	-	-	-	-	-	-	-	-	-	-	-	-	-	-	-	-	-	-	-	-	NP_001412.1	NP_001412	51.22	67.07	82	38	2	5	84	209	290	1e-19	91.7	IPR011991; IPR000418; IPR022084	Y	ELF4	9606 [Organism: human] [Scientific Name: Homo sapiens]	Y	13	-	-	-	-	-	-	-	-	-	-
-	-	-	-	-	-	-	-	-	-	-	-	-	-	-	-	-	-	-	-	-	NP_001412.1	NP_001412	51.22	67.07	82	38	2	5	84	209	290	1e-19	91.7	IPR011991; IPR000418; IPR022084	Y	ELF4	9606 [Organism: human] [Scientific Name: Homo sapiens]	Y	13	-	-	-	-	-	-	-	-	-	-
-	-	-	-	-	-	-	-	-	-	-	-	-	-	-	-	-	-	-	-	-	NP_001412.1	NP_001412	51.22	67.07	82	38	2	5	84	209	290	1e-19	91.7	IPR011991; IPR000418; IPR022084	Y	ELF4	9606 [Organism: human] [Scientific Name: Homo sapiens]	Y	13	-	-	-	-	-	-	-	-	-	-
-	-	-	-	-	-	-	-	-	-	-	-	-	-	-	-	-	-	-	-	-	NP_001412.1	NP_001412	51.22	67.07	82	38	2	5	84	209	290	1e-19	91.7	IPR011991; IPR000418; IPR022084	Y	ELF4	9606 [Organism: human] [Scientific Name: Homo sapiens]	Y	13	-	-	-	-	-	-	-	-	-	-
-	-	-	-	-	-	-	-	-	-	-	-	-	-	-	-	-	-	-	-	-	NP_001412.1	NP_001412	51.22	67.07	82	38	2	5	84	209	290	1e-19	91.7	IPR011991; IPR000418; IPR022084	Y	ELF4	9606 [Organism: human] [Scientific Name: Homo sapiens]	Y	13	-	-	-	-	-	-	-	-	-	-
-	-	-	-	-	-	-	-	-	-	-	-	-	-	-	-	-	-	-	-	-	NP_001412.1	NP_001412	51.22	67.07	82	38	2	5	84	209	290	1e-19	91.7	IPR011991; IPR000418; IPR022084	Y	ELF4	9606 [Organism: human] [Scientific Name: Homo sapiens]	Y	13	-	-	-	-	-	-	-	-	-	-
-	-	-	-	-	-	-	-	-	-	-	-	-	-	-	-	-	-	-	-	-	NP_001412.1	NP_001412	51.22	67.07	82	38	2	5	84	209	290	1e-19	91.7	IPR011991; IPR000418; IPR022084	Y	ELF4	9606 [Organism: human] [Scientific Name: Homo sapiens]	Y	13	-	-	-	-	-	-	-	-	-	-
-	-	-	-	-	-	-	-	-	-	-	-	-	-	-	-	-	-	-	-	-	NP_001412.1	NP_001412	51.22	67.07	82	38	2	5	84	209	290	1e-19	91.7	IPR011991; IPR000418; IPR022084	Y	ELF4	9606 [Organism: human] [Scientific Name: Homo sapiens]	Y	13	-	-	-	-	-	-	-	-	-	-
-	-	-	-	-	-	-	-	-	-	-	-	-	-	-	-	-	-	-	-	-	NP_001412.1	NP_001412	51.22	67.07	82	38	2	5	84	209	290	1e-19	91.7	IPR011991; IPR000418; IPR022084	Y	ELF4	9606 [Organism: human] [Scientific Name: Homo sapiens]	Y	13	-	-	-	-	-	-	-	-	-	-
-	-	-	-	-	-	-	-	-	-	-	-	-	-	-	-	-	-	-	-	-	NP_001412.1	NP_001412	51.22	67.07	82	38	2	5	84	209	290	1e-19	91.7	IPR011991; IPR000418; IPR022084	Y	ELF4	9606 [Organism: human] [Scientific Name: Homo sapiens]	Y	13	-	-	-	-	-	-	-	-	-	-
-	-	-	-	-	-	-	-	-	-	-	-	-	-	-	-	-	-	-	-	-	NP_001412.1	NP_001412	51.22	67.07	82	38	2	5	84	209	290	1e-19	91.7	IPR011991; IPR000418; IPR022084	Y	ELF4	9606 [Organism: human] [Scientific Name: Homo sapiens]	Y	13	-	-	-	-	-	-	-	-	-	-
-	-	-	-	-	-	-	-	-	-	-	-	-	-	-	-	-	-	-	-	-	NP_001412.1	NP_001412	51.22	67.07	82	38	2	5	84	209	290	1e-19	91.7	IPR011991; IPR000418; IPR022084	Y	ELF4	9606 [Organism: human] [Scientific Name: Homo sapiens]	Y	13	-	-	-	-	-	-	-	-	-	-
-	-	-	-	-	-	-	-	-	-	-	-	-	-	-	-	-	-	-	-	-	NP_001412.1	NP_001412	51.22	67.07	82	38	2	5	84	209	290	1e-19	91.7	IPR011991; IPR000418; IPR022084	Y	ELF4	9606 [Organism: human] [Scientific Name: Homo sapiens]	Y	13	-	-	-	-	-	-	-	-	-	-
-	-	-	-	-	-	-	-	-	-	-	-	-	-	-	-	-	-	-	-	-	NP_001412.1	NP_001412	51.22	67.07	82	38	2	5	84	209	290	1e-19	91.7	IPR011991; IPR000418; IPR022084	Y	ELF4	9606 [Organism: human] [Scientific Name: Homo sapiens]	Y	13	-	-	-	-	-	-	-	-	-	-
-	-	-	-	-	-	-	-	-	-	-	-	-	-	-	-	-	-	-	-	-	NP_001412.1	NP_001412	51.22	67.07	82	38	2	5	84	209	290	1e-19	91.7	IPR011991; IPR000418; IPR022084	Y	ELF4	9606 [Organism: human] [Scientific Name: Homo sapiens]	Y	13	-	-	-	-	-	-	-	-	-	-
-	-	-	-	-	-	-	-	-	-	-	-	-	-	-	-	-	-	-	-	-	NP_001412.1	NP_001412	51.22	67.07	82	38	2	5	84	209	290	1e-19	91.7	IPR011991; IPR000418; IPR022084	Y	ELF4	9606 [Organism: human] [Scientific Name: Homo sapiens]	Y	13	-	-	-	-	-	-	-	-	-	-
-	-	-	-	-	-	-	-	-	-	-	-	-	-	-	-	-	-	-	-	-	NP_001412.1	NP_001412	51.22	67.07	82	38	2	5	84	209	290	1e-19	91.7	IPR011991; IPR000418; IPR022084	Y	ELF4	9606 [Organism: human] [Scientific Name: Homo sapiens]	Y	13	-	-	-	-	-	-	-	-	-	-
-	-	-	-	-	-	-	-	-	-	-	-	-	-	-	-	-	-	-	-	-	NP_001412.1	NP_001412	51.22	67.07	82	38	2	5	84	209	290	1e-19	91.7	IPR011991; IPR000418; IPR022084	Y	ELF4	9606 [Organism: human] [Scientific Name: Homo sapiens]	Y	13	-	-	-	-	-	-	-	-	-	-
-	-	-	-	-	-	-	-	-	-	-	-	-	-	-	-	-	-	-	-	-	NP_001412.1	NP_001412	51.22	67.07	82	38	2	5	84	209	290	1e-19	91.7	IPR011991; IPR000418; IPR022084	Y	ELF4	9606 [Organism: human] [Scientific Name: Homo sapiens]	Y	13	-	-	-	-	-	-	-	-	-	-
-	-	-	-	-	-	-	-	-	-	-	-	-	-	-	-	-	-	-	-	-	NP_001412.1	NP_001412	51.22	67.07	82	38	2	5	84	209	290	1e-19	91.7	IPR011991; IPR000418; IPR022084	Y	ELF4	9606 [Organism: human] [Scientific Name: Homo sapiens]	Y	13	-	-	-	-	-	-	-	-	-	-
-	-	-	-	-	-	-	-	-	-	-	-	-	-	-	-	-	-	-	-	-	NP_001412.1	NP_001412	51.22	67.07	82	38	2	5	84	209	290	1e-19	91.7	IPR011991; IPR000418; IPR022084	Y	ELF4	9606 [Organism: human] [Scientific Name: Homo sapiens]	Y	13	-	-	-	-	-	-	-	-	-	-
-	-	-	-	-	-	-	-	-	-	-	-	-	-	-	-	-	-	-	-	-	NP_001412.1	NP_001412	51.22	67.07	82	38	2	5	84	209	290	1e-19	91.7	IPR011991; IPR000418; IPR022084	Y	ELF4	9606 [Organism: human] [Scientific Name: Homo sapiens]	Y	13	-	-	-	-	-	-	-	-	-	-
-	-	-	-	-	-	-	-	-	-	-	-	-	-	-	-	-	-	-	-	-	NP_001412.1	NP_001412	51.22	67.07	82	38	2	5	84	209	290	1e-19	91.7	IPR011991; IPR000418; IPR022084	Y	ELF4	9606 [Organism: human] [Scientific Name: Homo sapiens]	Y	13	-	-	-	-	-	-	-	-	-	-
-	-	-	-	-	-	-	-	-	-	-	-	-	-	-	-	-	-	-	-	-	NP_001120669.1	NP_001120669	51.22	67.07	82	38	2	5	84	209	290	1e-19	91.7	IPR011991; IPR000418; IPR022084	Y	ELF4	9606 [Organism: human] [Scientific Name: Homo sapiens]	Y	13	-	-	-	-	-	-	-	-	-	-
1YO5	C	O95238	gi|67464315|pdb|1YO5|C	53.41	62.5	88	38	3	1	85	7	94	3e-20	80.1	16.2	1.1	83	88	54	MOLECULE: ENHANCER SITE OF PROSTATE SPECIFIC ANTIGEN	NP_001239223.1	NP_001239223	52.94	62.35	85	37	3	4	85	232	316	4e-15	76.6	IPR003118; IPR013761; IPR000418; IPR011991	Y	SPDEF	9606 [Organism: human] [Scientific Name: Homo sapiens]	Y	5	1YO5-C00	1	65.46	75.86	0.7569	0.8771	0.9263	1.05	83	83
1YO5	C	O95238	gi|67464315|pdb|1YO5|C	53.41	62.5	88	38	3	1	85	7	94	3e-20	80.1	16.2	1.1	83	88	54	MOLECULE: ENHANCER SITE OF PROSTATE SPECIFIC ANTIGEN	NP_001239223.1	NP_001239223	52.94	62.35	85	37	3	4	85	232	316	4e-15	76.6	IPR003118; IPR013761; IPR000418; IPR011991	Y	SPDEF	9606 [Organism: human] [Scientific Name: Homo sapiens]	Y	5	1YO5-C00	1	65.46	75.86	0.7569	0.8771	0.9263	1.05	83	83
1YO5	C	O95238	gi|67464315|pdb|1YO5|C	53.41	62.5	88	38	3	1	85	7	94	3e-20	80.1	16.2	1.1	83	88	54	MOLECULE: ENHANCER SITE OF PROSTATE SPECIFIC ANTIGEN	NP_001239223.1	NP_001239223	52.94	62.35	85	37	3	4	85	232	316	4e-15	76.6	IPR003118; IPR013761; IPR000418; IPR011991	Y	SPDEF	9606 [Organism: human] [Scientific Name: Homo sapiens]	Y	5	1YO5-C00	1	65.46	75.86	0.7569	0.8771	0.9263	1.05	83	83
1YO5	C	O95238	gi|67464315|pdb|1YO5|C	53.41	62.5	88	38	3	1	85	7	94	3e-20	80.1	16.2	1.1	83	88	54	MOLECULE: ENHANCER SITE OF PROSTATE SPECIFIC ANTIGEN	NP_001239223.1	NP_001239223	52.94	62.35	85	37	3	4	85	232	316	4e-15	76.6	IPR003118; IPR013761; IPR000418; IPR011991	Y	SPDEF	9606 [Organism: human] [Scientific Name: Homo sapiens]	Y	5	1YO5-C00	1	65.46	75.86	0.7569	0.8771	0.9263	1.05	83	83
1YO5	C	O95238	gi|67464315|pdb|1YO5|C	53.41	62.5	88	38	3	1	85	7	94	3e-20	80.1	16.2	1.1	83	88	54	MOLECULE: ENHANCER SITE OF PROSTATE SPECIFIC ANTIGEN	NP_001239223.1	NP_001239223	52.94	62.35	85	37	3	4	85	232	316	4e-15	76.6	IPR003118; IPR013761; IPR000418; IPR011991	Y	SPDEF	9606 [Organism: human] [Scientific Name: Homo sapiens]	Y	5	1YO5-C00	1	65.46	75.86	0.7569	0.8771	0.9263	1.05	83	83
1YO5	C	O95238	gi|67464315|pdb|1YO5|C	53.41	62.5	88	38	3	1	85	7	94	3e-20	80.1	16.2	1.1	83	88	54	MOLECULE: ENHANCER SITE OF PROSTATE SPECIFIC ANTIGEN	NP_001239223.1	NP_001239223	52.94	62.35	85	37	3	4	85	232	316	4e-15	76.6	IPR003118; IPR013761; IPR000418; IPR011991	Y	SPDEF	9606 [Organism: human] [Scientific Name: Homo sapiens]	Y	5	1YO5-C00	1	65.46	75.86	0.7569	0.8771	0.9263	1.05	83	83
1YO5	C	O95238	gi|67464315|pdb|1YO5|C	53.41	62.5	88	38	3	1	85	7	94	3e-20	80.1	16.2	1.1	83	88	54	MOLECULE: ENHANCER SITE OF PROSTATE SPECIFIC ANTIGEN	NP_001239223.1	NP_001239223	52.94	62.35	85	37	3	4	85	232	316	4e-15	76.6	IPR003118; IPR013761; IPR000418; IPR011991	Y	SPDEF	9606 [Organism: human] [Scientific Name: Homo sapiens]	Y	5	1YO5-C00	1	65.46	75.86	0.7569	0.8771	0.9263	1.05	83	83
1YO5	C	O95238	gi|67464315|pdb|1YO5|C	53.41	62.5	88	38	3	1	85	7	94	3e-20	80.1	16.2	1.1	83	88	54	MOLECULE: ENHANCER SITE OF PROSTATE SPECIFIC ANTIGEN	NP_001239223.1	NP_001239223	52.94	62.35	85	37	3	4	85	232	316	4e-15	76.6	IPR003118; IPR013761; IPR000418; IPR011991	Y	SPDEF	9606 [Organism: human] [Scientific Name: Homo sapiens]	Y	5	1YO5-C00	1	65.46	75.86	0.7569	0.8771	0.9263	1.05	83	83
1YO5	C	O95238	gi|67464315|pdb|1YO5|C	53.41	62.5	88	38	3	1	85	7	94	3e-20	80.1	16.2	1.1	83	88	54	MOLECULE: ENHANCER SITE OF PROSTATE SPECIFIC ANTIGEN	NP_001239223.1	NP_001239223	52.94	62.35	85	37	3	4	85	232	316	4e-15	76.6	IPR003118; IPR013761; IPR000418; IPR011991	Y	SPDEF	9606 [Organism: human] [Scientific Name: Homo sapiens]	Y	5	1YO5-C00	1	65.46	75.86	0.7569	0.8771	0.9263	1.05	83	83
1YO5	C	O95238	gi|67464315|pdb|1YO5|C	53.41	62.5	88	38	3	1	85	7	94	3e-20	80.1	16.2	1.1	83	88	54	MOLECULE: ENHANCER SITE OF PROSTATE SPECIFIC ANTIGEN	NP_001239223.1	NP_001239223	52.94	62.35	85	37	3	4	85	232	316	4e-15	76.6	IPR003118; IPR013761; IPR000418; IPR011991	Y	SPDEF	9606 [Organism: human] [Scientific Name: Homo sapiens]	Y	5	1YO5-C00	1	65.46	75.86	0.7569	0.8771	0.9263	1.05	83	83
1YO5	C	O95238	gi|67464315|pdb|1YO5|C	53.41	62.5	88	38	3	1	85	7	94	3e-20	80.1	16.2	1.1	83	88	54	MOLECULE: ENHANCER SITE OF PROSTATE SPECIFIC ANTIGEN	NP_001239223.1	NP_001239223	52.94	62.35	85	37	3	4	85	232	316	4e-15	76.6	IPR003118; IPR013761; IPR000418; IPR011991	Y	SPDEF	9606 [Organism: human] [Scientific Name: Homo sapiens]	Y	5	1YO5-C00	1	65.46	75.86	0.7569	0.8771	0.9263	1.05	83	83
1YO5	C	O95238	gi|67464315|pdb|1YO5|C	53.41	62.5	88	38	3	1	85	7	94	3e-20	80.1	16.2	1.1	83	88	54	MOLECULE: ENHANCER SITE OF PROSTATE SPECIFIC ANTIGEN	NP_001239223.1	NP_001239223	52.94	62.35	85	37	3	4	85	232	316	4e-15	76.6	IPR003118; IPR013761; IPR000418; IPR011991	Y	SPDEF	9606 [Organism: human] [Scientific Name: Homo sapiens]	Y	5	1YO5-C00	1	65.46	75.86	0.7569	0.8771	0.9263	1.05	83	83
1YO5	C	O95238	gi|67464315|pdb|1YO5|C	53.41	62.5	88	38	3	1	85	7	94	3e-20	80.1	16.2	1.1	83	88	54	MOLECULE: ENHANCER SITE OF PROSTATE SPECIFIC ANTIGEN	NP_001239223.1	NP_001239223	52.94	62.35	85	37	3	4	85	232	316	4e-15	76.6	IPR003118; IPR013761; IPR000418; IPR011991	Y	SPDEF	9606 [Organism: human] [Scientific Name: Homo sapiens]	Y	5	1YO5-C00	1	65.46	75.86	0.7569	0.8771	0.9263	1.05	83	83
1YO5	C	O95238	gi|67464315|pdb|1YO5|C	53.41	62.5	88	38	3	1	85	7	94	3e-20	80.1	16.2	1.1	83	88	54	MOLECULE: ENHANCER SITE OF PROSTATE SPECIFIC ANTIGEN	NP_001239223.1	NP_001239223	52.94	62.35	85	37	3	4	85	232	316	4e-15	76.6	IPR003118; IPR013761; IPR000418; IPR011991	Y	SPDEF	9606 [Organism: human] [Scientific Name: Homo sapiens]	Y	5	1YO5-C00	1	65.46	75.86	0.7569	0.8771	0.9263	1.05	83	83
1YO5	C	O95238	gi|67464315|pdb|1YO5|C	53.41	62.5	88	38	3	1	85	7	94	3e-20	80.1	16.2	1.1	83	88	54	MOLECULE: ENHANCER SITE OF PROSTATE SPECIFIC ANTIGEN	NP_001239223.1	NP_001239223	52.94	62.35	85	37	3	4	85	232	316	4e-15	76.6	IPR003118; IPR013761; IPR000418; IPR011991	Y	SPDEF	9606 [Organism: human] [Scientific Name: Homo sapiens]	Y	5	1YO5-C00	1	65.46	75.86	0.7569	0.8771	0.9263	1.05	83	83
1YO5	C	O95238	gi|67464315|pdb|1YO5|C	53.41	62.5	88	38	3	1	85	7	94	3e-20	80.1	16.2	1.1	83	88	54	MOLECULE: ENHANCER SITE OF PROSTATE SPECIFIC ANTIGEN	NP_001239223.1	NP_001239223	52.94	62.35	85	37	3	4	85	232	316	4e-15	76.6	IPR003118; IPR013761; IPR000418; IPR011991	Y	SPDEF	9606 [Organism: human] [Scientific Name: Homo sapiens]	Y	5	1YO5-C00	1	65.46	75.86	0.7569	0.8771	0.9263	1.05	83	83
1YO5	C	O95238	gi|67464315|pdb|1YO5|C	53.41	62.5	88	38	3	1	85	7	94	3e-20	80.1	16.2	1.1	83	88	54	MOLECULE: ENHANCER SITE OF PROSTATE SPECIFIC ANTIGEN	NP_001239223.1	NP_001239223	52.94	62.35	85	37	3	4	85	232	316	4e-15	76.6	IPR003118; IPR013761; IPR000418; IPR011991	Y	SPDEF	9606 [Organism: human] [Scientific Name: Homo sapiens]	Y	5	1YO5-C00	1	65.46	75.86	0.7569	0.8771	0.9263	1.05	83	83
1YO5	C	O95238	gi|67464315|pdb|1YO5|C	53.41	62.5	88	38	3	1	85	7	94	3e-20	80.1	16.2	1.1	83	88	54	MOLECULE: ENHANCER SITE OF PROSTATE SPECIFIC ANTIGEN	NP_001239223.1	NP_001239223	52.94	62.35	85	37	3	4	85	232	316	4e-15	76.6	IPR003118; IPR013761; IPR000418; IPR011991	Y	SPDEF	9606 [Organism: human] [Scientific Name: Homo sapiens]	Y	5	1YO5-C00	1	65.46	75.86	0.7569	0.8771	0.9263	1.05	83	83
1YO5	C	O95238	gi|67464315|pdb|1YO5|C	53.41	62.5	88	38	3	1	85	7	94	3e-20	80.1	16.2	1.1	83	88	54	MOLECULE: ENHANCER SITE OF PROSTATE SPECIFIC ANTIGEN	NP_001239223.1	NP_001239223	52.94	62.35	85	37	3	4	85	232	316	4e-15	76.6	IPR003118; IPR013761; IPR000418; IPR011991	Y	SPDEF	9606 [Organism: human] [Scientific Name: Homo sapiens]	Y	5	1YO5-C00	1	65.46	75.86	0.7569	0.8771	0.9263	1.05	83	83
1YO5	C	O95238	gi|67464315|pdb|1YO5|C	53.41	62.5	88	38	3	1	85	7	94	3e-20	80.1	16.2	1.1	83	88	54	MOLECULE: ENHANCER SITE OF PROSTATE SPECIFIC ANTIGEN	NP_001239223.1	NP_001239223	52.94	62.35	85	37	3	4	85	232	316	4e-15	76.6	IPR003118; IPR013761; IPR000418; IPR011991	Y	SPDEF	9606 [Organism: human] [Scientific Name: Homo sapiens]	Y	5	1YO5-C00	1	65.46	75.86	0.7569	0.8771	0.9263	1.05	83	83
1YO5	C	O95238	gi|67464315|pdb|1YO5|C	53.41	62.5	88	38	3	1	85	7	94	3e-20	80.1	16.2	1.1	83	88	54	MOLECULE: ENHANCER SITE OF PROSTATE SPECIFIC ANTIGEN	NP_001239223.1	NP_001239223	52.94	62.35	85	37	3	4	85	232	316	4e-15	76.6	IPR003118; IPR013761; IPR000418; IPR011991	Y	SPDEF	9606 [Organism: human] [Scientific Name: Homo sapiens]	Y	5	1YO5-C00	1	65.46	75.86	0.7569	0.8771	0.9263	1.05	83	83
1YO5	C	O95238	gi|67464315|pdb|1YO5|C	53.41	62.5	88	38	3	1	85	7	94	3e-20	80.1	16.2	1.1	83	88	54	MOLECULE: ENHANCER SITE OF PROSTATE SPECIFIC ANTIGEN	NP_001239223.1	NP_001239223	52.94	62.35	85	37	3	4	85	232	316	4e-15	76.6	IPR003118; IPR013761; IPR000418; IPR011991	Y	SPDEF	9606 [Organism: human] [Scientific Name: Homo sapiens]	Y	5	1YO5-C00	1	65.46	75.86	0.7569	0.8771	0.9263	1.05	83	83
1YO5	C	O95238	gi|67464315|pdb|1YO5|C	53.41	62.5	88	38	3	1	85	7	94	3e-20	80.1	16.2	1.1	83	88	54	MOLECULE: ENHANCER SITE OF PROSTATE SPECIFIC ANTIGEN	NP_001239223.1	NP_001239223	52.94	62.35	85	37	3	4	85	232	316	4e-15	76.6	IPR003118; IPR013761; IPR000418; IPR011991	Y	SPDEF	9606 [Organism: human] [Scientific Name: Homo sapiens]	Y	5	1YO5-C00	1	65.46	75.86	0.7569	0.8771	0.9263	1.05	83	83
1YO5	C	O95238	gi|67464315|pdb|1YO5|C	53.41	62.5	88	38	3	1	85	7	94	3e-20	80.1	16.2	1.1	83	88	54	MOLECULE: ENHANCER SITE OF PROSTATE SPECIFIC ANTIGEN	NP_001239223.1	NP_001239223	52.94	62.35	85	37	3	4	85	232	316	4e-15	76.6	IPR003118; IPR013761; IPR000418; IPR011991	Y	SPDEF	9606 [Organism: human] [Scientific Name: Homo sapiens]	Y	5	1YO5-C00	1	65.46	75.86	0.7569	0.8771	0.9263	1.05	83	83
1YO5	C	O95238	gi|67464315|pdb|1YO5|C	53.41	62.5	88	38	3	1	85	7	94	3e-20	80.1	16.2	1.1	83	88	54	MOLECULE: ENHANCER SITE OF PROSTATE SPECIFIC ANTIGEN	NP_001239223.1	NP_001239223	52.94	62.35	85	37	3	4	85	232	316	4e-15	76.6	IPR003118; IPR013761; IPR000418; IPR011991	Y	SPDEF	9606 [Organism: human] [Scientific Name: Homo sapiens]	Y	5	1YO5-C00	1	65.46	75.86	0.7569	0.8771	0.9263	1.05	83	83
1YO5	C	O95238	gi|67464315|pdb|1YO5|C	53.41	62.5	88	38	3	1	85	7	94	3e-20	80.1	16.2	1.1	83	88	54	MOLECULE: ENHANCER SITE OF PROSTATE SPECIFIC ANTIGEN	NP_001239223.1	NP_001239223	52.94	62.35	85	37	3	4	85	232	316	4e-15	76.6	IPR003118; IPR013761; IPR000418; IPR011991	Y	SPDEF	9606 [Organism: human] [Scientific Name: Homo sapiens]	Y	5	1YO5-C00	1	65.46	75.86	0.7569	0.8771	0.9263	1.05	83	83
1YO5	C	O95238	gi|67464315|pdb|1YO5|C	53.41	62.5	88	38	3	1	85	7	94	3e-20	80.1	16.2	1.1	83	88	54	MOLECULE: ENHANCER SITE OF PROSTATE SPECIFIC ANTIGEN	NP_001239223.1	NP_001239223	52.94	62.35	85	37	3	4	85	232	316	4e-15	76.6	IPR003118; IPR013761; IPR000418; IPR011991	Y	SPDEF	9606 [Organism: human] [Scientific Name: Homo sapiens]	Y	5	1YO5-C00	1	65.46	75.86	0.7569	0.8771	0.9263	1.05	83	83
1YO5	C	O95238	gi|67464315|pdb|1YO5|C	53.41	62.5	88	38	3	1	85	7	94	3e-20	80.1	16.2	1.1	83	88	54	MOLECULE: ENHANCER SITE OF PROSTATE SPECIFIC ANTIGEN	NP_001239223.1	NP_001239223	52.94	62.35	85	37	3	4	85	232	316	4e-15	76.6	IPR003118; IPR013761; IPR000418; IPR011991	Y	SPDEF	9606 [Organism: human] [Scientific Name: Homo sapiens]	Y	5	1YO5-C00	1	65.46	75.86	0.7569	0.8771	0.9263	1.05	83	83
1YO5	C	O95238	gi|67464315|pdb|1YO5|C	53.41	62.5	88	38	3	1	85	7	94	3e-20	80.1	16.2	1.1	83	88	54	MOLECULE: ENHANCER SITE OF PROSTATE SPECIFIC ANTIGEN	NP_001239223.1	NP_001239223	52.94	62.35	85	37	3	4	85	232	316	4e-15	76.6	IPR003118; IPR013761; IPR000418; IPR011991	Y	SPDEF	9606 [Organism: human] [Scientific Name: Homo sapiens]	Y	5	1YO5-C00	1	65.46	75.86	0.7569	0.8771	0.9263	1.05	83	83
1YO5	C	O95238	gi|67464315|pdb|1YO5|C	53.41	62.5	88	38	3	1	85	7	94	3e-20	80.1	16.2	1.1	83	88	54	MOLECULE: ENHANCER SITE OF PROSTATE SPECIFIC ANTIGEN	NP_001239223.1	NP_001239223	52.94	62.35	85	37	3	4	85	232	316	4e-15	76.6	IPR003118; IPR013761; IPR000418; IPR011991	Y	SPDEF	9606 [Organism: human] [Scientific Name: Homo sapiens]	Y	5	1YO5-C00	1	65.46	75.86	0.7569	0.8771	0.9263	1.05	83	83
1YO5	C	O95238	gi|67464315|pdb|1YO5|C	53.41	62.5	88	38	3	1	85	7	94	3e-20	80.1	16.2	1.1	83	88	54	MOLECULE: ENHANCER SITE OF PROSTATE SPECIFIC ANTIGEN	NP_001239223.1	NP_001239223	52.94	62.35	85	37	3	4	85	232	316	4e-15	76.6	IPR003118; IPR013761; IPR000418; IPR011991	Y	SPDEF	9606 [Organism: human] [Scientific Name: Homo sapiens]	Y	5	1YO5-C00	1	65.46	75.86	0.7569	0.8771	0.9263	1.05	83	83
1YO5	C	O95238	gi|67464315|pdb|1YO5|C	53.41	62.5	88	38	3	1	85	7	94	3e-20	80.1	16.2	1.1	83	88	54	MOLECULE: ENHANCER SITE OF PROSTATE SPECIFIC ANTIGEN	NP_001239223.1	NP_001239223	52.94	62.35	85	37	3	4	85	232	316	4e-15	76.6	IPR003118; IPR013761; IPR000418; IPR011991	Y	SPDEF	9606 [Organism: human] [Scientific Name: Homo sapiens]	Y	5	1YO5-C00	1	65.46	75.86	0.7569	0.8771	0.9263	1.05	83	83
1YO5	C	O95238	gi|67464315|pdb|1YO5|C	53.41	62.5	88	38	3	1	85	7	94	3e-20	80.1	16.2	1.1	83	88	54	MOLECULE: ENHANCER SITE OF PROSTATE SPECIFIC ANTIGEN	NP_001239223.1	NP_001239223	52.94	62.35	85	37	3	4	85	232	316	4e-15	76.6	IPR003118; IPR013761; IPR000418; IPR011991	Y	SPDEF	9606 [Organism: human] [Scientific Name: Homo sapiens]	Y	5	1YO5-C00	1	65.46	75.86	0.7569	0.8771	0.9263	1.05	83	83
1YO5	C	O95238	gi|67464315|pdb|1YO5|C	53.41	62.5	88	38	3	1	85	7	94	3e-20	80.1	16.2	1.1	83	88	54	MOLECULE: ENHANCER SITE OF PROSTATE SPECIFIC ANTIGEN	NP_001239223.1	NP_001239223	52.94	62.35	85	37	3	4	85	232	316	4e-15	76.6	IPR003118; IPR013761; IPR000418; IPR011991	Y	SPDEF	9606 [Organism: human] [Scientific Name: Homo sapiens]	Y	5	1YO5-C00	1	65.46	75.86	0.7569	0.8771	0.9263	1.05	83	83
1YO5	C	O95238	gi|67464315|pdb|1YO5|C	53.41	62.5	88	38	3	1	85	7	94	3e-20	80.1	16.2	1.1	83	88	54	MOLECULE: ENHANCER SITE OF PROSTATE SPECIFIC ANTIGEN	NP_001239223.1	NP_001239223	52.94	62.35	85	37	3	4	85	232	316	4e-15	76.6	IPR003118; IPR013761; IPR000418; IPR011991	Y	SPDEF	9606 [Organism: human] [Scientific Name: Homo sapiens]	Y	5	1YO5-C00	1	65.46	75.86	0.7569	0.8771	0.9263	1.05	83	83
1YO5	C	O95238	gi|67464315|pdb|1YO5|C	53.41	62.5	88	38	3	1	85	7	94	3e-20	80.1	16.2	1.1	83	88	54	MOLECULE: ENHANCER SITE OF PROSTATE SPECIFIC ANTIGEN	NP_001239223.1	NP_001239223	52.94	62.35	85	37	3	4	85	232	316	4e-15	76.6	IPR003118; IPR013761; IPR000418; IPR011991	Y	SPDEF	9606 [Organism: human] [Scientific Name: Homo sapiens]	Y	5	1YO5-C00	1	65.46	75.86	0.7569	0.8771	0.9263	1.05	83	83
1YO5	C	O95238	gi|67464315|pdb|1YO5|C	53.41	62.5	88	38	3	1	85	7	94	3e-20	80.1	16.2	1.1	83	88	54	MOLECULE: ENHANCER SITE OF PROSTATE SPECIFIC ANTIGEN	NP_001239223.1	NP_001239223	52.94	62.35	85	37	3	4	85	232	316	4e-15	76.6	IPR003118; IPR013761; IPR000418; IPR011991	Y	SPDEF	9606 [Organism: human] [Scientific Name: Homo sapiens]	Y	5	1YO5-C00	1	65.46	75.86	0.7569	0.8771	0.9263	1.05	83	83
1YO5	C	O95238	gi|67464315|pdb|1YO5|C	53.41	62.5	88	38	3	1	85	7	94	3e-20	80.1	16.2	1.1	83	88	54	MOLECULE: ENHANCER SITE OF PROSTATE SPECIFIC ANTIGEN	NP_001239223.1	NP_001239223	52.94	62.35	85	37	3	4	85	232	316	4e-15	76.6	IPR003118; IPR013761; IPR000418; IPR011991	Y	SPDEF	9606 [Organism: human] [Scientific Name: Homo sapiens]	Y	5	1YO5-C00	1	65.46	75.86	0.7569	0.8771	0.9263	1.05	83	83
1YO5	C	O95238	gi|67464315|pdb|1YO5|C	53.41	62.5	88	38	3	1	85	7	94	3e-20	80.1	16.2	1.1	83	88	54	MOLECULE: ENHANCER SITE OF PROSTATE SPECIFIC ANTIGEN	NP_001239223.1	NP_001239223	52.94	62.35	85	37	3	4	85	232	316	4e-15	76.6	IPR003118; IPR013761; IPR000418; IPR011991	Y	SPDEF	9606 [Organism: human] [Scientific Name: Homo sapiens]	Y	5	1YO5-C00	1	65.46	75.86	0.7569	0.8771	0.9263	1.05	83	83
1YO5	C	O95238	gi|67464315|pdb|1YO5|C	53.41	62.5	88	38	3	1	85	7	94	3e-20	80.1	16.2	1.1	83	88	54	MOLECULE: ENHANCER SITE OF PROSTATE SPECIFIC ANTIGEN	NP_001239223.1	NP_001239223	52.94	62.35	85	37	3	4	85	232	316	4e-15	76.6	IPR003118; IPR013761; IPR000418; IPR011991	Y	SPDEF	9606 [Organism: human] [Scientific Name: Homo sapiens]	Y	5	1YO5-C00	1	65.46	75.86	0.7569	0.8771	0.9263	1.05	83	83
1YO5	C	O95238	gi|67464315|pdb|1YO5|C	53.41	62.5	88	38	3	1	85	7	94	3e-20	80.1	16.2	1.1	83	88	54	MOLECULE: ENHANCER SITE OF PROSTATE SPECIFIC ANTIGEN	NP_001239223.1	NP_001239223	52.94	62.35	85	37	3	4	85	232	316	4e-15	76.6	IPR003118; IPR013761; IPR000418; IPR011991	Y	SPDEF	9606 [Organism: human] [Scientific Name: Homo sapiens]	Y	5	1YO5-C00	1	65.46	75.86	0.7569	0.8771	0.9263	1.05	83	83
1YO5	C	O95238	gi|67464315|pdb|1YO5|C	53.41	62.5	88	38	3	1	85	7	94	3e-20	80.1	16.2	1.1	83	88	54	MOLECULE: ENHANCER SITE OF PROSTATE SPECIFIC ANTIGEN	NP_001239223.1	NP_001239223	52.94	62.35	85	37	3	4	85	232	316	4e-15	76.6	IPR003118; IPR013761; IPR000418; IPR011991	Y	SPDEF	9606 [Organism: human] [Scientific Name: Homo sapiens]	Y	5	1YO5-C00	1	65.46	75.86	0.7569	0.8771	0.9263	1.05	83	83
1YO5	C	O95238	gi|67464315|pdb|1YO5|C	53.41	62.5	88	38	3	1	85	7	94	3e-20	80.1	16.2	1.1	83	88	54	MOLECULE: ENHANCER SITE OF PROSTATE SPECIFIC ANTIGEN	NP_001239223.1	NP_001239223	52.94	62.35	85	37	3	4	85	232	316	4e-15	76.6	IPR003118; IPR013761; IPR000418; IPR011991	Y	SPDEF	9606 [Organism: human] [Scientific Name: Homo sapiens]	Y	5	1YO5-C00	1	65.46	75.86	0.7569	0.8771	0.9263	1.05	83	83
1YO5	C	O95238	gi|67464315|pdb|1YO5|C	53.41	62.5	88	38	3	1	85	7	94	3e-20	80.1	16.2	1.1	83	88	54	MOLECULE: ENHANCER SITE OF PROSTATE SPECIFIC ANTIGEN	NP_036523.1	NP_036523	52.94	62.35	85	37	3	4	85	248	332	5e-15	76.6	IPR003118; IPR013761; IPR000418; IPR011991	Y	SPDEF	9606 [Organism: human] [Scientific Name: Homo sapiens]	Y	5	1YO5-C00	1	65.46	75.86	0.7569	0.8771	0.9263	1.05	83	83
1YO5	C	O95238	gi|67464315|pdb|1YO5|C	53.41	62.5	88	38	3	1	85	7	94	3e-20	80.1	16.2	1.1	83	88	54	MOLECULE: ENHANCER SITE OF PROSTATE SPECIFIC ANTIGEN	NP_036523.1	NP_036523	52.94	62.35	85	37	3	4	85	248	332	5e-15	76.6	IPR003118; IPR013761; IPR000418; IPR011991	Y	SPDEF	9606 [Organism: human] [Scientific Name: Homo sapiens]	Y	5	1YO5-C00	1	65.46	75.86	0.7569	0.8771	0.9263	1.05	83	83
1YO5	C	O95238	gi|67464315|pdb|1YO5|C	53.41	62.5	88	38	3	1	85	7	94	3e-20	80.1	16.2	1.1	83	88	54	MOLECULE: ENHANCER SITE OF PROSTATE SPECIFIC ANTIGEN	NP_036523.1	NP_036523	52.94	62.35	85	37	3	4	85	248	332	5e-15	76.6	IPR003118; IPR013761; IPR000418; IPR011991	Y	SPDEF	9606 [Organism: human] [Scientific Name: Homo sapiens]	Y	5	1YO5-C00	1	65.46	75.86	0.7569	0.8771	0.9263	1.05	83	83
1YO5	C	O95238	gi|67464315|pdb|1YO5|C	53.41	62.5	88	38	3	1	85	7	94	3e-20	80.1	16.2	1.1	83	88	54	MOLECULE: ENHANCER SITE OF PROSTATE SPECIFIC ANTIGEN	NP_036523.1	NP_036523	52.94	62.35	85	37	3	4	85	248	332	5e-15	76.6	IPR003118; IPR013761; IPR000418; IPR011991	Y	SPDEF	9606 [Organism: human] [Scientific Name: Homo sapiens]	Y	5	1YO5-C00	1	65.46	75.86	0.7569	0.8771	0.9263	1.05	83	83
1YO5	C	O95238	gi|67464315|pdb|1YO5|C	53.41	62.5	88	38	3	1	85	7	94	3e-20	80.1	16.2	1.1	83	88	54	MOLECULE: ENHANCER SITE OF PROSTATE SPECIFIC ANTIGEN	NP_036523.1	NP_036523	52.94	62.35	85	37	3	4	85	248	332	5e-15	76.6	IPR003118; IPR013761; IPR000418; IPR011991	Y	SPDEF	9606 [Organism: human] [Scientific Name: Homo sapiens]	Y	5	1YO5-C00	1	65.46	75.86	0.7569	0.8771	0.9263	1.05	83	83
1YO5	C	O95238	gi|67464315|pdb|1YO5|C	53.41	62.5	88	38	3	1	85	7	94	3e-20	80.1	16.2	1.1	83	88	54	MOLECULE: ENHANCER SITE OF PROSTATE SPECIFIC ANTIGEN	NP_036523.1	NP_036523	52.94	62.35	85	37	3	4	85	248	332	5e-15	76.6	IPR003118; IPR013761; IPR000418; IPR011991	Y	SPDEF	9606 [Organism: human] [Scientific Name: Homo sapiens]	Y	5	1YO5-C00	1	65.46	75.86	0.7569	0.8771	0.9263	1.05	83	83
1YO5	C	O95238	gi|67464315|pdb|1YO5|C	53.41	62.5	88	38	3	1	85	7	94	3e-20	80.1	16.2	1.1	83	88	54	MOLECULE: ENHANCER SITE OF PROSTATE SPECIFIC ANTIGEN	NP_036523.1	NP_036523	52.94	62.35	85	37	3	4	85	248	332	5e-15	76.6	IPR003118; IPR013761; IPR000418; IPR011991	Y	SPDEF	9606 [Organism: human] [Scientific Name: Homo sapiens]	Y	5	1YO5-C00	1	65.46	75.86	0.7569	0.8771	0.9263	1.05	83	83
1YO5	C	O95238	gi|67464315|pdb|1YO5|C	53.41	62.5	88	38	3	1	85	7	94	3e-20	80.1	16.2	1.1	83	88	54	MOLECULE: ENHANCER SITE OF PROSTATE SPECIFIC ANTIGEN	NP_036523.1	NP_036523	52.94	62.35	85	37	3	4	85	248	332	5e-15	76.6	IPR003118; IPR013761; IPR000418; IPR011991	Y	SPDEF	9606 [Organism: human] [Scientific Name: Homo sapiens]	Y	5	1YO5-C00	1	65.46	75.86	0.7569	0.8771	0.9263	1.05	83	83
1YO5	C	O95238	gi|67464315|pdb|1YO5|C	53.41	62.5	88	38	3	1	85	7	94	3e-20	80.1	16.2	1.1	83	88	54	MOLECULE: ENHANCER SITE OF PROSTATE SPECIFIC ANTIGEN	NP_036523.1	NP_036523	52.94	62.35	85	37	3	4	85	248	332	5e-15	76.6	IPR003118; IPR013761; IPR000418; IPR011991	Y	SPDEF	9606 [Organism: human] [Scientific Name: Homo sapiens]	Y	5	1YO5-C00	1	65.46	75.86	0.7569	0.8771	0.9263	1.05	83	83
1YO5	C	O95238	gi|67464315|pdb|1YO5|C	53.41	62.5	88	38	3	1	85	7	94	3e-20	80.1	16.2	1.1	83	88	54	MOLECULE: ENHANCER SITE OF PROSTATE SPECIFIC ANTIGEN	NP_036523.1	NP_036523	52.94	62.35	85	37	3	4	85	248	332	5e-15	76.6	IPR003118; IPR013761; IPR000418; IPR011991	Y	SPDEF	9606 [Organism: human] [Scientific Name: Homo sapiens]	Y	5	1YO5-C00	1	65.46	75.86	0.7569	0.8771	0.9263	1.05	83	83
1YO5	C	O95238	gi|67464315|pdb|1YO5|C	53.41	62.5	88	38	3	1	85	7	94	3e-20	80.1	16.2	1.1	83	88	54	MOLECULE: ENHANCER SITE OF PROSTATE SPECIFIC ANTIGEN	NP_036523.1	NP_036523	52.94	62.35	85	37	3	4	85	248	332	5e-15	76.6	IPR003118; IPR013761; IPR000418; IPR011991	Y	SPDEF	9606 [Organism: human] [Scientific Name: Homo sapiens]	Y	5	1YO5-C00	1	65.46	75.86	0.7569	0.8771	0.9263	1.05	83	83
1YO5	C	O95238	gi|67464315|pdb|1YO5|C	53.41	62.5	88	38	3	1	85	7	94	3e-20	80.1	16.2	1.1	83	88	54	MOLECULE: ENHANCER SITE OF PROSTATE SPECIFIC ANTIGEN	NP_036523.1	NP_036523	52.94	62.35	85	37	3	4	85	248	332	5e-15	76.6	IPR003118; IPR013761; IPR000418; IPR011991	Y	SPDEF	9606 [Organism: human] [Scientific Name: Homo sapiens]	Y	5	1YO5-C00	1	65.46	75.86	0.7569	0.8771	0.9263	1.05	83	83
1YO5	C	O95238	gi|67464315|pdb|1YO5|C	53.41	62.5	88	38	3	1	85	7	94	3e-20	80.1	16.2	1.1	83	88	54	MOLECULE: ENHANCER SITE OF PROSTATE SPECIFIC ANTIGEN	NP_036523.1	NP_036523	52.94	62.35	85	37	3	4	85	248	332	5e-15	76.6	IPR003118; IPR013761; IPR000418; IPR011991	Y	SPDEF	9606 [Organism: human] [Scientific Name: Homo sapiens]	Y	5	1YO5-C00	1	65.46	75.86	0.7569	0.8771	0.9263	1.05	83	83
1YO5	C	O95238	gi|67464315|pdb|1YO5|C	53.41	62.5	88	38	3	1	85	7	94	3e-20	80.1	16.2	1.1	83	88	54	MOLECULE: ENHANCER SITE OF PROSTATE SPECIFIC ANTIGEN	NP_036523.1	NP_036523	52.94	62.35	85	37	3	4	85	248	332	5e-15	76.6	IPR003118; IPR013761; IPR000418; IPR011991	Y	SPDEF	9606 [Organism: human] [Scientific Name: Homo sapiens]	Y	5	1YO5-C00	1	65.46	75.86	0.7569	0.8771	0.9263	1.05	83	83
1YO5	C	O95238	gi|67464315|pdb|1YO5|C	53.41	62.5	88	38	3	1	85	7	94	3e-20	80.1	16.2	1.1	83	88	54	MOLECULE: ENHANCER SITE OF PROSTATE SPECIFIC ANTIGEN	NP_036523.1	NP_036523	52.94	62.35	85	37	3	4	85	248	332	5e-15	76.6	IPR003118; IPR013761; IPR000418; IPR011991	Y	SPDEF	9606 [Organism: human] [Scientific Name: Homo sapiens]	Y	5	1YO5-C00	1	65.46	75.86	0.7569	0.8771	0.9263	1.05	83	83
1YO5	C	O95238	gi|67464315|pdb|1YO5|C	53.41	62.5	88	38	3	1	85	7	94	3e-20	80.1	16.2	1.1	83	88	54	MOLECULE: ENHANCER SITE OF PROSTATE SPECIFIC ANTIGEN	NP_036523.1	NP_036523	52.94	62.35	85	37	3	4	85	248	332	5e-15	76.6	IPR003118; IPR013761; IPR000418; IPR011991	Y	SPDEF	9606 [Organism: human] [Scientific Name: Homo sapiens]	Y	5	1YO5-C00	1	65.46	75.86	0.7569	0.8771	0.9263	1.05	83	83
1YO5	C	O95238	gi|67464315|pdb|1YO5|C	53.41	62.5	88	38	3	1	85	7	94	3e-20	80.1	16.2	1.1	83	88	54	MOLECULE: ENHANCER SITE OF PROSTATE SPECIFIC ANTIGEN	NP_036523.1	NP_036523	52.94	62.35	85	37	3	4	85	248	332	5e-15	76.6	IPR003118; IPR013761; IPR000418; IPR011991	Y	SPDEF	9606 [Organism: human] [Scientific Name: Homo sapiens]	Y	5	1YO5-C00	1	65.46	75.86	0.7569	0.8771	0.9263	1.05	83	83
1YO5	C	O95238	gi|67464315|pdb|1YO5|C	53.41	62.5	88	38	3	1	85	7	94	3e-20	80.1	16.2	1.1	83	88	54	MOLECULE: ENHANCER SITE OF PROSTATE SPECIFIC ANTIGEN	NP_036523.1	NP_036523	52.94	62.35	85	37	3	4	85	248	332	5e-15	76.6	IPR003118; IPR013761; IPR000418; IPR011991	Y	SPDEF	9606 [Organism: human] [Scientific Name: Homo sapiens]	Y	5	1YO5-C00	1	65.46	75.86	0.7569	0.8771	0.9263	1.05	83	83
1YO5	C	O95238	gi|67464315|pdb|1YO5|C	53.41	62.5	88	38	3	1	85	7	94	3e-20	80.1	16.2	1.1	83	88	54	MOLECULE: ENHANCER SITE OF PROSTATE SPECIFIC ANTIGEN	NP_036523.1	NP_036523	52.94	62.35	85	37	3	4	85	248	332	5e-15	76.6	IPR003118; IPR013761; IPR000418; IPR011991	Y	SPDEF	9606 [Organism: human] [Scientific Name: Homo sapiens]	Y	5	1YO5-C00	1	65.46	75.86	0.7569	0.8771	0.9263	1.05	83	83
1YO5	C	O95238	gi|67464315|pdb|1YO5|C	53.41	62.5	88	38	3	1	85	7	94	3e-20	80.1	16.2	1.1	83	88	54	MOLECULE: ENHANCER SITE OF PROSTATE SPECIFIC ANTIGEN	NP_036523.1	NP_036523	52.94	62.35	85	37	3	4	85	248	332	5e-15	76.6	IPR003118; IPR013761; IPR000418; IPR011991	Y	SPDEF	9606 [Organism: human] [Scientific Name: Homo sapiens]	Y	5	1YO5-C00	1	65.46	75.86	0.7569	0.8771	0.9263	1.05	83	83
1YO5	C	O95238	gi|67464315|pdb|1YO5|C	53.41	62.5	88	38	3	1	85	7	94	3e-20	80.1	16.2	1.1	83	88	54	MOLECULE: ENHANCER SITE OF PROSTATE SPECIFIC ANTIGEN	NP_036523.1	NP_036523	52.94	62.35	85	37	3	4	85	248	332	5e-15	76.6	IPR003118; IPR013761; IPR000418; IPR011991	Y	SPDEF	9606 [Organism: human] [Scientific Name: Homo sapiens]	Y	5	1YO5-C00	1	65.46	75.86	0.7569	0.8771	0.9263	1.05	83	83
1YO5	C	O95238	gi|67464315|pdb|1YO5|C	53.41	62.5	88	38	3	1	85	7	94	3e-20	80.1	16.2	1.1	83	88	54	MOLECULE: ENHANCER SITE OF PROSTATE SPECIFIC ANTIGEN	NP_036523.1	NP_036523	52.94	62.35	85	37	3	4	85	248	332	5e-15	76.6	IPR003118; IPR013761; IPR000418; IPR011991	Y	SPDEF	9606 [Organism: human] [Scientific Name: Homo sapiens]	Y	5	1YO5-C00	1	65.46	75.86	0.7569	0.8771	0.9263	1.05	83	83
1YO5	C	O95238	gi|67464315|pdb|1YO5|C	53.41	62.5	88	38	3	1	85	7	94	3e-20	80.1	16.2	1.1	83	88	54	MOLECULE: ENHANCER SITE OF PROSTATE SPECIFIC ANTIGEN	NP_036523.1	NP_036523	52.94	62.35	85	37	3	4	85	248	332	5e-15	76.6	IPR003118; IPR013761; IPR000418; IPR011991	Y	SPDEF	9606 [Organism: human] [Scientific Name: Homo sapiens]	Y	5	1YO5-C00	1	65.46	75.86	0.7569	0.8771	0.9263	1.05	83	83
1YO5	C	O95238	gi|67464315|pdb|1YO5|C	53.41	62.5	88	38	3	1	85	7	94	3e-20	80.1	16.2	1.1	83	88	54	MOLECULE: ENHANCER SITE OF PROSTATE SPECIFIC ANTIGEN	NP_036523.1	NP_036523	52.94	62.35	85	37	3	4	85	248	332	5e-15	76.6	IPR003118; IPR013761; IPR000418; IPR011991	Y	SPDEF	9606 [Organism: human] [Scientific Name: Homo sapiens]	Y	5	1YO5-C00	1	65.46	75.86	0.7569	0.8771	0.9263	1.05	83	83
1YO5	C	O95238	gi|67464315|pdb|1YO5|C	53.41	62.5	88	38	3	1	85	7	94	3e-20	80.1	16.2	1.1	83	88	54	MOLECULE: ENHANCER SITE OF PROSTATE SPECIFIC ANTIGEN	NP_036523.1	NP_036523	52.94	62.35	85	37	3	4	85	248	332	5e-15	76.6	IPR003118; IPR013761; IPR000418; IPR011991	Y	SPDEF	9606 [Organism: human] [Scientific Name: Homo sapiens]	Y	5	1YO5-C00	1	65.46	75.86	0.7569	0.8771	0.9263	1.05	83	83
1YO5	C	O95238	gi|67464315|pdb|1YO5|C	53.41	62.5	88	38	3	1	85	7	94	3e-20	80.1	16.2	1.1	83	88	54	MOLECULE: ENHANCER SITE OF PROSTATE SPECIFIC ANTIGEN	NP_036523.1	NP_036523	52.94	62.35	85	37	3	4	85	248	332	5e-15	76.6	IPR003118; IPR013761; IPR000418; IPR011991	Y	SPDEF	9606 [Organism: human] [Scientific Name: Homo sapiens]	Y	5	1YO5-C00	1	65.46	75.86	0.7569	0.8771	0.9263	1.05	83	83
1YO5	C	O95238	gi|67464315|pdb|1YO5|C	53.41	62.5	88	38	3	1	85	7	94	3e-20	80.1	16.2	1.1	83	88	54	MOLECULE: ENHANCER SITE OF PROSTATE SPECIFIC ANTIGEN	NP_036523.1	NP_036523	52.94	62.35	85	37	3	4	85	248	332	5e-15	76.6	IPR003118; IPR013761; IPR000418; IPR011991	Y	SPDEF	9606 [Organism: human] [Scientific Name: Homo sapiens]	Y	5	1YO5-C00	1	65.46	75.86	0.7569	0.8771	0.9263	1.05	83	83
1YO5	C	O95238	gi|67464315|pdb|1YO5|C	53.41	62.5	88	38	3	1	85	7	94	3e-20	80.1	16.2	1.1	83	88	54	MOLECULE: ENHANCER SITE OF PROSTATE SPECIFIC ANTIGEN	NP_036523.1	NP_036523	52.94	62.35	85	37	3	4	85	248	332	5e-15	76.6	IPR003118; IPR013761; IPR000418; IPR011991	Y	SPDEF	9606 [Organism: human] [Scientific Name: Homo sapiens]	Y	5	1YO5-C00	1	65.46	75.86	0.7569	0.8771	0.9263	1.05	83	83
1YO5	C	O95238	gi|67464315|pdb|1YO5|C	53.41	62.5	88	38	3	1	85	7	94	3e-20	80.1	16.2	1.1	83	88	54	MOLECULE: ENHANCER SITE OF PROSTATE SPECIFIC ANTIGEN	NP_036523.1	NP_036523	52.94	62.35	85	37	3	4	85	248	332	5e-15	76.6	IPR003118; IPR013761; IPR000418; IPR011991	Y	SPDEF	9606 [Organism: human] [Scientific Name: Homo sapiens]	Y	5	1YO5-C00	1	65.46	75.86	0.7569	0.8771	0.9263	1.05	83	83
1YO5	C	O95238	gi|67464315|pdb|1YO5|C	53.41	62.5	88	38	3	1	85	7	94	3e-20	80.1	16.2	1.1	83	88	54	MOLECULE: ENHANCER SITE OF PROSTATE SPECIFIC ANTIGEN	NP_036523.1	NP_036523	52.94	62.35	85	37	3	4	85	248	332	5e-15	76.6	IPR003118; IPR013761; IPR000418; IPR011991	Y	SPDEF	9606 [Organism: human] [Scientific Name: Homo sapiens]	Y	5	1YO5-C00	1	65.46	75.86	0.7569	0.8771	0.9263	1.05	83	83
1YO5	C	O95238	gi|67464315|pdb|1YO5|C	53.41	62.5	88	38	3	1	85	7	94	3e-20	80.1	16.2	1.1	83	88	54	MOLECULE: ENHANCER SITE OF PROSTATE SPECIFIC ANTIGEN	NP_036523.1	NP_036523	52.94	62.35	85	37	3	4	85	248	332	5e-15	76.6	IPR003118; IPR013761; IPR000418; IPR011991	Y	SPDEF	9606 [Organism: human] [Scientific Name: Homo sapiens]	Y	5	1YO5-C00	1	65.46	75.86	0.7569	0.8771	0.9263	1.05	83	83
1YO5	C	O95238	gi|67464315|pdb|1YO5|C	53.41	62.5	88	38	3	1	85	7	94	3e-20	80.1	16.2	1.1	83	88	54	MOLECULE: ENHANCER SITE OF PROSTATE SPECIFIC ANTIGEN	NP_036523.1	NP_036523	52.94	62.35	85	37	3	4	85	248	332	5e-15	76.6	IPR003118; IPR013761; IPR000418; IPR011991	Y	SPDEF	9606 [Organism: human] [Scientific Name: Homo sapiens]	Y	5	1YO5-C00	1	65.46	75.86	0.7569	0.8771	0.9263	1.05	83	83
1YO5	C	O95238	gi|67464315|pdb|1YO5|C	53.41	62.5	88	38	3	1	85	7	94	3e-20	80.1	16.2	1.1	83	88	54	MOLECULE: ENHANCER SITE OF PROSTATE SPECIFIC ANTIGEN	NP_036523.1	NP_036523	52.94	62.35	85	37	3	4	85	248	332	5e-15	76.6	IPR003118; IPR013761; IPR000418; IPR011991	Y	SPDEF	9606 [Organism: human] [Scientific Name: Homo sapiens]	Y	5	1YO5-C00	1	65.46	75.86	0.7569	0.8771	0.9263	1.05	83	83
1YO5	C	O95238	gi|67464315|pdb|1YO5|C	53.41	62.5	88	38	3	1	85	7	94	3e-20	80.1	16.2	1.1	83	88	54	MOLECULE: ENHANCER SITE OF PROSTATE SPECIFIC ANTIGEN	NP_036523.1	NP_036523	52.94	62.35	85	37	3	4	85	248	332	5e-15	76.6	IPR003118; IPR013761; IPR000418; IPR011991	Y	SPDEF	9606 [Organism: human] [Scientific Name: Homo sapiens]	Y	5	1YO5-C00	1	65.46	75.86	0.7569	0.8771	0.9263	1.05	83	83
1YO5	C	O95238	gi|67464315|pdb|1YO5|C	53.41	62.5	88	38	3	1	85	7	94	3e-20	80.1	16.2	1.1	83	88	54	MOLECULE: ENHANCER SITE OF PROSTATE SPECIFIC ANTIGEN	NP_036523.1	NP_036523	52.94	62.35	85	37	3	4	85	248	332	5e-15	76.6	IPR003118; IPR013761; IPR000418; IPR011991	Y	SPDEF	9606 [Organism: human] [Scientific Name: Homo sapiens]	Y	5	1YO5-C00	1	65.46	75.86	0.7569	0.8771	0.9263	1.05	83	83
1YO5	C	O95238	gi|67464315|pdb|1YO5|C	53.41	62.5	88	38	3	1	85	7	94	3e-20	80.1	16.2	1.1	83	88	54	MOLECULE: ENHANCER SITE OF PROSTATE SPECIFIC ANTIGEN	NP_036523.1	NP_036523	52.94	62.35	85	37	3	4	85	248	332	5e-15	76.6	IPR003118; IPR013761; IPR000418; IPR011991	Y	SPDEF	9606 [Organism: human] [Scientific Name: Homo sapiens]	Y	5	1YO5-C00	1	65.46	75.86	0.7569	0.8771	0.9263	1.05	83	83
1YO5	C	O95238	gi|67464315|pdb|1YO5|C	53.41	62.5	88	38	3	1	85	7	94	3e-20	80.1	16.2	1.1	83	88	54	MOLECULE: ENHANCER SITE OF PROSTATE SPECIFIC ANTIGEN	NP_036523.1	NP_036523	52.94	62.35	85	37	3	4	85	248	332	5e-15	76.6	IPR003118; IPR013761; IPR000418; IPR011991	Y	SPDEF	9606 [Organism: human] [Scientific Name: Homo sapiens]	Y	5	1YO5-C00	1	65.46	75.86	0.7569	0.8771	0.9263	1.05	83	83
1YO5	C	O95238	gi|67464315|pdb|1YO5|C	53.41	62.5	88	38	3	1	85	7	94	3e-20	80.1	16.2	1.1	83	88	54	MOLECULE: ENHANCER SITE OF PROSTATE SPECIFIC ANTIGEN	NP_036523.1	NP_036523	52.94	62.35	85	37	3	4	85	248	332	5e-15	76.6	IPR003118; IPR013761; IPR000418; IPR011991	Y	SPDEF	9606 [Organism: human] [Scientific Name: Homo sapiens]	Y	5	1YO5-C00	1	65.46	75.86	0.7569	0.8771	0.9263	1.05	83	83
1YO5	C	O95238	gi|67464315|pdb|1YO5|C	53.41	62.5	88	38	3	1	85	7	94	3e-20	80.1	16.2	1.1	83	88	54	MOLECULE: ENHANCER SITE OF PROSTATE SPECIFIC ANTIGEN	NP_036523.1	NP_036523	52.94	62.35	85	37	3	4	85	248	332	5e-15	76.6	IPR003118; IPR013761; IPR000418; IPR011991	Y	SPDEF	9606 [Organism: human] [Scientific Name: Homo sapiens]	Y	5	1YO5-C00	1	65.46	75.86	0.7569	0.8771	0.9263	1.05	83	83
1YO5	C	O95238	gi|67464315|pdb|1YO5|C	53.41	62.5	88	38	3	1	85	7	94	3e-20	80.1	16.2	1.1	83	88	54	MOLECULE: ENHANCER SITE OF PROSTATE SPECIFIC ANTIGEN	NP_036523.1	NP_036523	52.94	62.35	85	37	3	4	85	248	332	5e-15	76.6	IPR003118; IPR013761; IPR000418; IPR011991	Y	SPDEF	9606 [Organism: human] [Scientific Name: Homo sapiens]	Y	5	1YO5-C00	1	65.46	75.86	0.7569	0.8771	0.9263	1.05	83	83
1YO5	C	O95238	gi|67464315|pdb|1YO5|C	53.41	62.5	88	38	3	1	85	7	94	3e-20	80.1	16.2	1.1	83	88	54	MOLECULE: ENHANCER SITE OF PROSTATE SPECIFIC ANTIGEN	NP_036523.1	NP_036523	52.94	62.35	85	37	3	4	85	248	332	5e-15	76.6	IPR003118; IPR013761; IPR000418; IPR011991	Y	SPDEF	9606 [Organism: human] [Scientific Name: Homo sapiens]	Y	5	1YO5-C00	1	65.46	75.86	0.7569	0.8771	0.9263	1.05	83	83
1YO5	C	O95238	gi|67464315|pdb|1YO5|C	53.41	62.5	88	38	3	1	85	7	94	3e-20	80.1	16.2	1.1	83	88	54	MOLECULE: ENHANCER SITE OF PROSTATE SPECIFIC ANTIGEN	NP_036523.1	NP_036523	52.94	62.35	85	37	3	4	85	248	332	5e-15	76.6	IPR003118; IPR013761; IPR000418; IPR011991	Y	SPDEF	9606 [Organism: human] [Scientific Name: Homo sapiens]	Y	5	1YO5-C00	1	65.46	75.86	0.7569	0.8771	0.9263	1.05	83	83
1YO5	C	O95238	gi|67464315|pdb|1YO5|C	53.41	62.5	88	38	3	1	85	7	94	3e-20	80.1	16.2	1.1	83	88	54	MOLECULE: ENHANCER SITE OF PROSTATE SPECIFIC ANTIGEN	NP_036523.1	NP_036523	52.94	62.35	85	37	3	4	85	248	332	5e-15	76.6	IPR003118; IPR013761; IPR000418; IPR011991	Y	SPDEF	9606 [Organism: human] [Scientific Name: Homo sapiens]	Y	5	1YO5-C00	1	65.46	75.86	0.7569	0.8771	0.9263	1.05	83	83
1BC8	C	P28324	gi|4139948|pdb|1BC8|C	60	73.85	65	26	0	21	85	21	85	3e-22	84.7	16.5	0.7	82	93	59	'MOLECULE: DNA (5''-D(*TP*AP*CP*CP*GP*GP*AP*AP*GP*T)-3''); '	NP_001964.2	NP_001964	60	73.85	65	26	0	21	85	21	85	1e-19	90.5	IPR000418; IPR011991	Y	ELK4	9606 [Organism: human] [Scientific Name: Homo sapiens]	Y	26	1BC8-C	-	-	-	-	-	-	-	-	-
1BC8	C	P28324	gi|4139948|pdb|1BC8|C	60	73.85	65	26	0	21	85	21	85	3e-22	84.7	16.5	0.7	82	93	59	'MOLECULE: DNA (5''-D(*TP*AP*CP*CP*GP*GP*AP*AP*GP*T)-3''); '	NP_001964.2	NP_001964	60	73.85	65	26	0	21	85	21	85	1e-19	90.5	IPR000418; IPR011991	Y	ELK4	9606 [Organism: human] [Scientific Name: Homo sapiens]	Y	26	1BC8-C	-	-	-	-	-	-	-	-	-
1BC8	C	P28324	gi|4139948|pdb|1BC8|C	60	73.85	65	26	0	21	85	21	85	3e-22	84.7	16.5	0.7	82	93	59	'MOLECULE: DNA (5''-D(*TP*AP*CP*CP*GP*GP*AP*AP*GP*T)-3''); '	NP_001964.2	NP_001964	60	73.85	65	26	0	21	85	21	85	1e-19	90.5	IPR000418; IPR011991	Y	ELK4	9606 [Organism: human] [Scientific Name: Homo sapiens]	Y	26	1BC8-C	-	-	-	-	-	-	-	-	-
1BC8	C	P28324	gi|4139948|pdb|1BC8|C	60	73.85	65	26	0	21	85	21	85	3e-22	84.7	16.5	0.7	82	93	59	'MOLECULE: DNA (5''-D(*TP*AP*CP*CP*GP*GP*AP*AP*GP*T)-3''); '	NP_001964.2	NP_001964	60	73.85	65	26	0	21	85	21	85	1e-19	90.5	IPR000418; IPR011991	Y	ELK4	9606 [Organism: human] [Scientific Name: Homo sapiens]	Y	26	1BC8-C	-	-	-	-	-	-	-	-	-
1BC8	C	P28324	gi|4139948|pdb|1BC8|C	60	73.85	65	26	0	21	85	21	85	3e-22	84.7	16.5	0.7	82	93	59	'MOLECULE: DNA (5''-D(*TP*AP*CP*CP*GP*GP*AP*AP*GP*T)-3''); '	NP_001964.2	NP_001964	60	73.85	65	26	0	21	85	21	85	1e-19	90.5	IPR000418; IPR011991	Y	ELK4	9606 [Organism: human] [Scientific Name: Homo sapiens]	Y	26	1BC8-C	-	-	-	-	-	-	-	-	-
1BC8	C	P28324	gi|4139948|pdb|1BC8|C	60	73.85	65	26	0	21	85	21	85	3e-22	84.7	16.5	0.7	82	93	59	'MOLECULE: DNA (5''-D(*TP*AP*CP*CP*GP*GP*AP*AP*GP*T)-3''); '	NP_001964.2	NP_001964	60	73.85	65	26	0	21	85	21	85	1e-19	90.5	IPR000418; IPR011991	Y	ELK4	9606 [Organism: human] [Scientific Name: Homo sapiens]	Y	26	1BC8-C	-	-	-	-	-	-	-	-	-
1BC8	C	P28324	gi|4139948|pdb|1BC8|C	60	73.85	65	26	0	21	85	21	85	3e-22	84.7	16.5	0.7	82	93	59	'MOLECULE: DNA (5''-D(*TP*AP*CP*CP*GP*GP*AP*AP*GP*T)-3''); '	NP_001964.2	NP_001964	60	73.85	65	26	0	21	85	21	85	1e-19	90.5	IPR000418; IPR011991	Y	ELK4	9606 [Organism: human] [Scientific Name: Homo sapiens]	Y	26	1BC8-C	-	-	-	-	-	-	-	-	-
1BC8	C	P28324	gi|4139948|pdb|1BC8|C	60	73.85	65	26	0	21	85	21	85	3e-22	84.7	16.5	0.7	82	93	59	'MOLECULE: DNA (5''-D(*TP*AP*CP*CP*GP*GP*AP*AP*GP*T)-3''); '	NP_001964.2	NP_001964	60	73.85	65	26	0	21	85	21	85	1e-19	90.5	IPR000418; IPR011991	Y	ELK4	9606 [Organism: human] [Scientific Name: Homo sapiens]	Y	26	1BC8-C	-	-	-	-	-	-	-	-	-
1BC8	C	P28324	gi|4139948|pdb|1BC8|C	60	73.85	65	26	0	21	85	21	85	3e-22	84.7	16.5	0.7	82	93	59	'MOLECULE: DNA (5''-D(*TP*AP*CP*CP*GP*GP*AP*AP*GP*T)-3''); '	NP_001964.2	NP_001964	60	73.85	65	26	0	21	85	21	85	1e-19	90.5	IPR000418; IPR011991	Y	ELK4	9606 [Organism: human] [Scientific Name: Homo sapiens]	Y	26	1BC8-C	-	-	-	-	-	-	-	-	-
1BC8	C	P28324	gi|4139948|pdb|1BC8|C	60	73.85	65	26	0	21	85	21	85	3e-22	84.7	16.5	0.7	82	93	59	'MOLECULE: DNA (5''-D(*TP*AP*CP*CP*GP*GP*AP*AP*GP*T)-3''); '	NP_001964.2	NP_001964	60	73.85	65	26	0	21	85	21	85	1e-19	90.5	IPR000418; IPR011991	Y	ELK4	9606 [Organism: human] [Scientific Name: Homo sapiens]	Y	26	1BC8-C	-	-	-	-	-	-	-	-	-
1BC8	C	P28324	gi|4139948|pdb|1BC8|C	60	73.85	65	26	0	21	85	21	85	3e-22	84.7	16.5	0.7	82	93	59	'MOLECULE: DNA (5''-D(*TP*AP*CP*CP*GP*GP*AP*AP*GP*T)-3''); '	NP_001964.2	NP_001964	60	73.85	65	26	0	21	85	21	85	1e-19	90.5	IPR000418; IPR011991	Y	ELK4	9606 [Organism: human] [Scientific Name: Homo sapiens]	Y	26	1BC8-C	-	-	-	-	-	-	-	-	-
1BC8	C	P28324	gi|4139948|pdb|1BC8|C	60	73.85	65	26	0	21	85	21	85	3e-22	84.7	16.5	0.7	82	93	59	'MOLECULE: DNA (5''-D(*TP*AP*CP*CP*GP*GP*AP*AP*GP*T)-3''); '	NP_001964.2	NP_001964	60	73.85	65	26	0	21	85	21	85	1e-19	90.5	IPR000418; IPR011991	Y	ELK4	9606 [Organism: human] [Scientific Name: Homo sapiens]	Y	26	1BC8-C	-	-	-	-	-	-	-	-	-
1BC8	C	P28324	gi|4139948|pdb|1BC8|C	60	73.85	65	26	0	21	85	21	85	3e-22	84.7	16.5	0.7	82	93	59	'MOLECULE: DNA (5''-D(*TP*AP*CP*CP*GP*GP*AP*AP*GP*T)-3''); '	NP_001964.2	NP_001964	60	73.85	65	26	0	21	85	21	85	1e-19	90.5	IPR000418; IPR011991	Y	ELK4	9606 [Organism: human] [Scientific Name: Homo sapiens]	Y	26	1BC8-C	-	-	-	-	-	-	-	-	-
1BC8	C	P28324	gi|4139948|pdb|1BC8|C	60	73.85	65	26	0	21	85	21	85	3e-22	84.7	16.5	0.7	82	93	59	'MOLECULE: DNA (5''-D(*TP*AP*CP*CP*GP*GP*AP*AP*GP*T)-3''); '	NP_001964.2	NP_001964	60	73.85	65	26	0	21	85	21	85	1e-19	90.5	IPR000418; IPR011991	Y	ELK4	9606 [Organism: human] [Scientific Name: Homo sapiens]	Y	26	1BC8-C	-	-	-	-	-	-	-	-	-
1BC8	C	P28324	gi|4139948|pdb|1BC8|C	60	73.85	65	26	0	21	85	21	85	3e-22	84.7	16.5	0.7	82	93	59	'MOLECULE: DNA (5''-D(*TP*AP*CP*CP*GP*GP*AP*AP*GP*T)-3''); '	NP_001964.2	NP_001964	60	73.85	65	26	0	21	85	21	85	1e-19	90.5	IPR000418; IPR011991	Y	ELK4	9606 [Organism: human] [Scientific Name: Homo sapiens]	Y	26	1BC8-C	-	-	-	-	-	-	-	-	-
1BC8	C	P28324	gi|4139948|pdb|1BC8|C	60	73.85	65	26	0	21	85	21	85	3e-22	84.7	16.5	0.7	82	93	59	'MOLECULE: DNA (5''-D(*TP*AP*CP*CP*GP*GP*AP*AP*GP*T)-3''); '	NP_001964.2	NP_001964	60	73.85	65	26	0	21	85	21	85	1e-19	90.5	IPR000418; IPR011991	Y	ELK4	9606 [Organism: human] [Scientific Name: Homo sapiens]	Y	26	1BC8-C	-	-	-	-	-	-	-	-	-
1BC8	C	P28324	gi|4139948|pdb|1BC8|C	60	73.85	65	26	0	21	85	21	85	3e-22	84.7	16.5	0.7	82	93	59	'MOLECULE: DNA (5''-D(*TP*AP*CP*CP*GP*GP*AP*AP*GP*T)-3''); '	NP_001964.2	NP_001964	60	73.85	65	26	0	21	85	21	85	1e-19	90.5	IPR000418; IPR011991	Y	ELK4	9606 [Organism: human] [Scientific Name: Homo sapiens]	Y	26	1BC8-C	-	-	-	-	-	-	-	-	-
1BC8	C	P28324	gi|4139948|pdb|1BC8|C	60	73.85	65	26	0	21	85	21	85	3e-22	84.7	16.5	0.7	82	93	59	'MOLECULE: DNA (5''-D(*TP*AP*CP*CP*GP*GP*AP*AP*GP*T)-3''); '	NP_001964.2	NP_001964	60	73.85	65	26	0	21	85	21	85	1e-19	90.5	IPR000418; IPR011991	Y	ELK4	9606 [Organism: human] [Scientific Name: Homo sapiens]	Y	26	1BC8-C	-	-	-	-	-	-	-	-	-
1BC8	C	P28324	gi|4139948|pdb|1BC8|C	60	73.85	65	26	0	21	85	21	85	3e-22	84.7	16.5	0.7	82	93	59	'MOLECULE: DNA (5''-D(*TP*AP*CP*CP*GP*GP*AP*AP*GP*T)-3''); '	NP_001964.2	NP_001964	60	73.85	65	26	0	21	85	21	85	1e-19	90.5	IPR000418; IPR011991	Y	ELK4	9606 [Organism: human] [Scientific Name: Homo sapiens]	Y	26	1BC8-C	-	-	-	-	-	-	-	-	-
1BC8	C	P28324	gi|4139948|pdb|1BC8|C	60	73.85	65	26	0	21	85	21	85	3e-22	84.7	16.5	0.7	82	93	59	'MOLECULE: DNA (5''-D(*TP*AP*CP*CP*GP*GP*AP*AP*GP*T)-3''); '	NP_001964.2	NP_001964	60	73.85	65	26	0	21	85	21	85	1e-19	90.5	IPR000418; IPR011991	Y	ELK4	9606 [Organism: human] [Scientific Name: Homo sapiens]	Y	26	1BC8-C	-	-	-	-	-	-	-	-	-
1BC8	C	P28324	gi|4139948|pdb|1BC8|C	60	73.85	65	26	0	21	85	21	85	3e-22	84.7	16.5	0.7	82	93	59	'MOLECULE: DNA (5''-D(*TP*AP*CP*CP*GP*GP*AP*AP*GP*T)-3''); '	NP_001964.2	NP_001964	60	73.85	65	26	0	21	85	21	85	1e-19	90.5	IPR000418; IPR011991	Y	ELK4	9606 [Organism: human] [Scientific Name: Homo sapiens]	Y	26	1BC8-C	-	-	-	-	-	-	-	-	-
1BC8	C	P28324	gi|4139948|pdb|1BC8|C	60	73.85	65	26	0	21	85	21	85	3e-22	84.7	16.5	0.7	82	93	59	'MOLECULE: DNA (5''-D(*TP*AP*CP*CP*GP*GP*AP*AP*GP*T)-3''); '	NP_001964.2	NP_001964	60	73.85	65	26	0	21	85	21	85	1e-19	90.5	IPR000418; IPR011991	Y	ELK4	9606 [Organism: human] [Scientific Name: Homo sapiens]	Y	26	1BC8-C	-	-	-	-	-	-	-	-	-
1BC8	C	P28324	gi|4139948|pdb|1BC8|C	60	73.85	65	26	0	21	85	21	85	3e-22	84.7	16.5	0.7	82	93	59	'MOLECULE: DNA (5''-D(*TP*AP*CP*CP*GP*GP*AP*AP*GP*T)-3''); '	NP_001964.2	NP_001964	60	73.85	65	26	0	21	85	21	85	1e-19	90.5	IPR000418; IPR011991	Y	ELK4	9606 [Organism: human] [Scientific Name: Homo sapiens]	Y	26	1BC8-C	-	-	-	-	-	-	-	-	-
1BC8	C	P28324	gi|4139948|pdb|1BC8|C	60	73.85	65	26	0	21	85	21	85	3e-22	84.7	16.5	0.7	82	93	59	'MOLECULE: DNA (5''-D(*TP*AP*CP*CP*GP*GP*AP*AP*GP*T)-3''); '	NP_001964.2	NP_001964	60	73.85	65	26	0	21	85	21	85	1e-19	90.5	IPR000418; IPR011991	Y	ELK4	9606 [Organism: human] [Scientific Name: Homo sapiens]	Y	26	1BC8-C	-	-	-	-	-	-	-	-	-
1BC8	C	P28324	gi|4139948|pdb|1BC8|C	60	73.85	65	26	0	21	85	21	85	3e-22	84.7	16.5	0.7	82	93	59	'MOLECULE: DNA (5''-D(*TP*AP*CP*CP*GP*GP*AP*AP*GP*T)-3''); '	NP_001964.2	NP_001964	60	73.85	65	26	0	21	85	21	85	1e-19	90.5	IPR000418; IPR011991	Y	ELK4	9606 [Organism: human] [Scientific Name: Homo sapiens]	Y	26	1BC8-C	-	-	-	-	-	-	-	-	-
1BC8	C	P28324	gi|4139948|pdb|1BC8|C	60	73.85	65	26	0	21	85	21	85	3e-22	84.7	16.5	0.7	82	93	59	'MOLECULE: DNA (5''-D(*TP*AP*CP*CP*GP*GP*AP*AP*GP*T)-3''); '	NP_001964.2	NP_001964	60	73.85	65	26	0	21	85	21	85	1e-19	90.5	IPR000418; IPR011991	Y	ELK4	9606 [Organism: human] [Scientific Name: Homo sapiens]	Y	26	1BC8-C	-	-	-	-	-	-	-	-	-
1BC8	C	P28324	gi|4139948|pdb|1BC8|C	60	73.85	65	26	0	21	85	21	85	3e-22	84.7	16.5	0.7	82	93	59	'MOLECULE: DNA (5''-D(*TP*AP*CP*CP*GP*GP*AP*AP*GP*T)-3''); '	NP_001964.2	NP_001964	60	73.85	65	26	0	21	85	21	85	1e-19	90.5	IPR000418; IPR011991	Y	ELK4	9606 [Organism: human] [Scientific Name: Homo sapiens]	Y	26	1BC8-C	-	-	-	-	-	-	-	-	-
1BC8	C	P28324	gi|4139948|pdb|1BC8|C	60	73.85	65	26	0	21	85	21	85	3e-22	84.7	16.5	0.7	82	93	59	'MOLECULE: DNA (5''-D(*TP*AP*CP*CP*GP*GP*AP*AP*GP*T)-3''); '	NP_001964.2	NP_001964	60	73.85	65	26	0	21	85	21	85	1e-19	90.5	IPR000418; IPR011991	Y	ELK4	9606 [Organism: human] [Scientific Name: Homo sapiens]	Y	26	1BC8-C	-	-	-	-	-	-	-	-	-
1BC8	C	P28324	gi|4139948|pdb|1BC8|C	60	73.85	65	26	0	21	85	21	85	3e-22	84.7	16.5	0.7	82	93	59	'MOLECULE: DNA (5''-D(*TP*AP*CP*CP*GP*GP*AP*AP*GP*T)-3''); '	NP_001964.2	NP_001964	60	73.85	65	26	0	21	85	21	85	1e-19	90.5	IPR000418; IPR011991	Y	ELK4	9606 [Organism: human] [Scientific Name: Homo sapiens]	Y	26	1BC8-C	-	-	-	-	-	-	-	-	-
1BC8	C	P28324	gi|4139948|pdb|1BC8|C	60	73.85	65	26	0	21	85	21	85	3e-22	84.7	16.5	0.7	82	93	59	'MOLECULE: DNA (5''-D(*TP*AP*CP*CP*GP*GP*AP*AP*GP*T)-3''); '	NP_001964.2	NP_001964	60	73.85	65	26	0	21	85	21	85	1e-19	90.5	IPR000418; IPR011991	Y	ELK4	9606 [Organism: human] [Scientific Name: Homo sapiens]	Y	26	1BC8-C	-	-	-	-	-	-	-	-	-
1BC8	C	P28324	gi|4139948|pdb|1BC8|C	60	73.85	65	26	0	21	85	21	85	3e-22	84.7	16.5	0.7	82	93	59	'MOLECULE: DNA (5''-D(*TP*AP*CP*CP*GP*GP*AP*AP*GP*T)-3''); '	NP_001964.2	NP_001964	60	73.85	65	26	0	21	85	21	85	1e-19	90.5	IPR000418; IPR011991	Y	ELK4	9606 [Organism: human] [Scientific Name: Homo sapiens]	Y	26	1BC8-C	-	-	-	-	-	-	-	-	-
1BC8	C	P28324	gi|4139948|pdb|1BC8|C	60	73.85	65	26	0	21	85	21	85	3e-22	84.7	16.5	0.7	82	93	59	'MOLECULE: DNA (5''-D(*TP*AP*CP*CP*GP*GP*AP*AP*GP*T)-3''); '	NP_001964.2	NP_001964	60	73.85	65	26	0	21	85	21	85	1e-19	90.5	IPR000418; IPR011991	Y	ELK4	9606 [Organism: human] [Scientific Name: Homo sapiens]	Y	26	1BC8-C	-	-	-	-	-	-	-	-	-
1BC8	C	P28324	gi|4139948|pdb|1BC8|C	60	73.85	65	26	0	21	85	21	85	3e-22	84.7	16.5	0.7	82	93	59	'MOLECULE: DNA (5''-D(*TP*AP*CP*CP*GP*GP*AP*AP*GP*T)-3''); '	NP_001964.2	NP_001964	60	73.85	65	26	0	21	85	21	85	1e-19	90.5	IPR000418; IPR011991	Y	ELK4	9606 [Organism: human] [Scientific Name: Homo sapiens]	Y	26	1BC8-C	-	-	-	-	-	-	-	-	-
1BC8	C	P28324	gi|4139948|pdb|1BC8|C	60	73.85	65	26	0	21	85	21	85	3e-22	84.7	16.5	0.7	82	93	59	'MOLECULE: DNA (5''-D(*TP*AP*CP*CP*GP*GP*AP*AP*GP*T)-3''); '	NP_001964.2	NP_001964	60	73.85	65	26	0	21	85	21	85	1e-19	90.5	IPR000418; IPR011991	Y	ELK4	9606 [Organism: human] [Scientific Name: Homo sapiens]	Y	26	1BC8-C	-	-	-	-	-	-	-	-	-
1BC8	C	P28324	gi|4139948|pdb|1BC8|C	60	73.85	65	26	0	21	85	21	85	3e-22	84.7	16.5	0.7	82	93	59	'MOLECULE: DNA (5''-D(*TP*AP*CP*CP*GP*GP*AP*AP*GP*T)-3''); '	NP_001964.2	NP_001964	60	73.85	65	26	0	21	85	21	85	1e-19	90.5	IPR000418; IPR011991	Y	ELK4	9606 [Organism: human] [Scientific Name: Homo sapiens]	Y	26	1BC8-C	-	-	-	-	-	-	-	-	-
1BC8	C	P28324	gi|4139948|pdb|1BC8|C	60	73.85	65	26	0	21	85	21	85	3e-22	84.7	16.5	0.7	82	93	59	'MOLECULE: DNA (5''-D(*TP*AP*CP*CP*GP*GP*AP*AP*GP*T)-3''); '	NP_001964.2	NP_001964	60	73.85	65	26	0	21	85	21	85	1e-19	90.5	IPR000418; IPR011991	Y	ELK4	9606 [Organism: human] [Scientific Name: Homo sapiens]	Y	26	1BC8-C	-	-	-	-	-	-	-	-	-
1BC8	C	P28324	gi|4139948|pdb|1BC8|C	60	73.85	65	26	0	21	85	21	85	3e-22	84.7	16.5	0.7	82	93	59	'MOLECULE: DNA (5''-D(*TP*AP*CP*CP*GP*GP*AP*AP*GP*T)-3''); '	NP_001964.2	NP_001964	60	73.85	65	26	0	21	85	21	85	1e-19	90.5	IPR000418; IPR011991	Y	ELK4	9606 [Organism: human] [Scientific Name: Homo sapiens]	Y	26	1BC8-C	-	-	-	-	-	-	-	-	-
1BC8	C	P28324	gi|4139948|pdb|1BC8|C	60	73.85	65	26	0	21	85	21	85	3e-22	84.7	16.5	0.7	82	93	59	'MOLECULE: DNA (5''-D(*TP*AP*CP*CP*GP*GP*AP*AP*GP*T)-3''); '	NP_001964.2	NP_001964	60	73.85	65	26	0	21	85	21	85	1e-19	90.5	IPR000418; IPR011991	Y	ELK4	9606 [Organism: human] [Scientific Name: Homo sapiens]	Y	26	1BC8-C	-	-	-	-	-	-	-	-	-
1BC8	C	P28324	gi|4139948|pdb|1BC8|C	60	73.85	65	26	0	21	85	21	85	3e-22	84.7	16.5	0.7	82	93	59	'MOLECULE: DNA (5''-D(*TP*AP*CP*CP*GP*GP*AP*AP*GP*T)-3''); '	NP_001964.2	NP_001964	60	73.85	65	26	0	21	85	21	85	1e-19	90.5	IPR000418; IPR011991	Y	ELK4	9606 [Organism: human] [Scientific Name: Homo sapiens]	Y	26	1BC8-C	-	-	-	-	-	-	-	-	-
1BC8	C	P28324	gi|4139948|pdb|1BC8|C	60	73.85	65	26	0	21	85	21	85	3e-22	84.7	16.5	0.7	82	93	59	'MOLECULE: DNA (5''-D(*TP*AP*CP*CP*GP*GP*AP*AP*GP*T)-3''); '	NP_001964.2	NP_001964	60	73.85	65	26	0	21	85	21	85	1e-19	90.5	IPR000418; IPR011991	Y	ELK4	9606 [Organism: human] [Scientific Name: Homo sapiens]	Y	26	1BC8-C	-	-	-	-	-	-	-	-	-
1BC8	C	P28324	gi|4139948|pdb|1BC8|C	60	73.85	65	26	0	21	85	21	85	3e-22	84.7	16.5	0.7	82	93	59	'MOLECULE: DNA (5''-D(*TP*AP*CP*CP*GP*GP*AP*AP*GP*T)-3''); '	NP_001964.2	NP_001964	60	73.85	65	26	0	21	85	21	85	1e-19	90.5	IPR000418; IPR011991	Y	ELK4	9606 [Organism: human] [Scientific Name: Homo sapiens]	Y	26	1BC8-C	-	-	-	-	-	-	-	-	-
1BC8	C	P28324	gi|4139948|pdb|1BC8|C	60	73.85	65	26	0	21	85	21	85	3e-22	84.7	16.5	0.7	82	93	59	'MOLECULE: DNA (5''-D(*TP*AP*CP*CP*GP*GP*AP*AP*GP*T)-3''); '	NP_001964.2	NP_001964	60	73.85	65	26	0	21	85	21	85	1e-19	90.5	IPR000418; IPR011991	Y	ELK4	9606 [Organism: human] [Scientific Name: Homo sapiens]	Y	26	1BC8-C	-	-	-	-	-	-	-	-	-
1BC8	C	P28324	gi|4139948|pdb|1BC8|C	60	73.85	65	26	0	21	85	21	85	3e-22	84.7	16.5	0.7	82	93	59	'MOLECULE: DNA (5''-D(*TP*AP*CP*CP*GP*GP*AP*AP*GP*T)-3''); '	NP_001964.2	NP_001964	60	73.85	65	26	0	21	85	21	85	1e-19	90.5	IPR000418; IPR011991	Y	ELK4	9606 [Organism: human] [Scientific Name: Homo sapiens]	Y	26	1BC8-C	-	-	-	-	-	-	-	-	-
1BC8	C	P28324	gi|4139948|pdb|1BC8|C	60	73.85	65	26	0	21	85	21	85	3e-22	84.7	16.5	0.7	82	93	59	'MOLECULE: DNA (5''-D(*TP*AP*CP*CP*GP*GP*AP*AP*GP*T)-3''); '	NP_001964.2	NP_001964	60	73.85	65	26	0	21	85	21	85	1e-19	90.5	IPR000418; IPR011991	Y	ELK4	9606 [Organism: human] [Scientific Name: Homo sapiens]	Y	26	1BC8-C	-	-	-	-	-	-	-	-	-
1BC8	C	P28324	gi|4139948|pdb|1BC8|C	60	73.85	65	26	0	21	85	21	85	3e-22	84.7	16.5	0.7	82	93	59	'MOLECULE: DNA (5''-D(*TP*AP*CP*CP*GP*GP*AP*AP*GP*T)-3''); '	NP_001964.2	NP_001964	60	73.85	65	26	0	21	85	21	85	1e-19	90.5	IPR000418; IPR011991	Y	ELK4	9606 [Organism: human] [Scientific Name: Homo sapiens]	Y	26	1BC8-C	-	-	-	-	-	-	-	-	-
1BC8	C	P28324	gi|4139948|pdb|1BC8|C	60	73.85	65	26	0	21	85	21	85	3e-22	84.7	16.5	0.7	82	93	59	'MOLECULE: DNA (5''-D(*TP*AP*CP*CP*GP*GP*AP*AP*GP*T)-3''); '	NP_001964.2	NP_001964	60	73.85	65	26	0	21	85	21	85	1e-19	90.5	IPR000418; IPR011991	Y	ELK4	9606 [Organism: human] [Scientific Name: Homo sapiens]	Y	26	1BC8-C	-	-	-	-	-	-	-	-	-
1BC8	C	P28324	gi|4139948|pdb|1BC8|C	60	73.85	65	26	0	21	85	21	85	3e-22	84.7	16.5	0.7	82	93	59	'MOLECULE: DNA (5''-D(*TP*AP*CP*CP*GP*GP*AP*AP*GP*T)-3''); '	NP_001964.2	NP_001964	60	73.85	65	26	0	21	85	21	85	1e-19	90.5	IPR000418; IPR011991	Y	ELK4	9606 [Organism: human] [Scientific Name: Homo sapiens]	Y	26	1BC8-C	-	-	-	-	-	-	-	-	-
1BC8	C	P28324	gi|4139948|pdb|1BC8|C	60	73.85	65	26	0	21	85	21	85	3e-22	84.7	16.5	0.7	82	93	59	'MOLECULE: DNA (5''-D(*TP*AP*CP*CP*GP*GP*AP*AP*GP*T)-3''); '	NP_001964.2	NP_001964	60	73.85	65	26	0	21	85	21	85	1e-19	90.5	IPR000418; IPR011991	Y	ELK4	9606 [Organism: human] [Scientific Name: Homo sapiens]	Y	26	1BC8-C	-	-	-	-	-	-	-	-	-
1BC8	C	P28324	gi|4139948|pdb|1BC8|C	60	73.85	65	26	0	21	85	21	85	3e-22	84.7	16.5	0.7	82	93	59	'MOLECULE: DNA (5''-D(*TP*AP*CP*CP*GP*GP*AP*AP*GP*T)-3''); '	NP_001964.2	NP_001964	60	73.85	65	26	0	21	85	21	85	1e-19	90.5	IPR000418; IPR011991	Y	ELK4	9606 [Organism: human] [Scientific Name: Homo sapiens]	Y	26	1BC8-C	-	-	-	-	-	-	-	-	-
1BC8	C	P28324	gi|4139948|pdb|1BC8|C	60	73.85	65	26	0	21	85	21	85	3e-22	84.7	16.5	0.7	82	93	59	'MOLECULE: DNA (5''-D(*TP*AP*CP*CP*GP*GP*AP*AP*GP*T)-3''); '	NP_068567.1	NP_068567	60	73.85	65	26	0	21	85	21	85	9e-20	90.5	IPR000418; IPR011991	Y	ELK4	9606 [Organism: human] [Scientific Name: Homo sapiens]	Y	26	1BC8-C	-	-	-	-	-	-	-	-	-
1BC8	C	P28324	gi|4139948|pdb|1BC8|C	60	73.85	65	26	0	21	85	21	85	3e-22	84.7	16.5	0.7	82	93	59	'MOLECULE: DNA (5''-D(*TP*AP*CP*CP*GP*GP*AP*AP*GP*T)-3''); '	NP_068567.1	NP_068567	60	73.85	65	26	0	21	85	21	85	9e-20	90.5	IPR000418; IPR011991	Y	ELK4	9606 [Organism: human] [Scientific Name: Homo sapiens]	Y	26	1BC8-C	-	-	-	-	-	-	-	-	-
1BC8	C	P28324	gi|4139948|pdb|1BC8|C	60	73.85	65	26	0	21	85	21	85	3e-22	84.7	16.5	0.7	82	93	59	'MOLECULE: DNA (5''-D(*TP*AP*CP*CP*GP*GP*AP*AP*GP*T)-3''); '	NP_068567.1	NP_068567	60	73.85	65	26	0	21	85	21	85	9e-20	90.5	IPR000418; IPR011991	Y	ELK4	9606 [Organism: human] [Scientific Name: Homo sapiens]	Y	26	1BC8-C	-	-	-	-	-	-	-	-	-
1BC8	C	P28324	gi|4139948|pdb|1BC8|C	60	73.85	65	26	0	21	85	21	85	3e-22	84.7	16.5	0.7	82	93	59	'MOLECULE: DNA (5''-D(*TP*AP*CP*CP*GP*GP*AP*AP*GP*T)-3''); '	NP_068567.1	NP_068567	60	73.85	65	26	0	21	85	21	85	9e-20	90.5	IPR000418; IPR011991	Y	ELK4	9606 [Organism: human] [Scientific Name: Homo sapiens]	Y	26	1BC8-C	-	-	-	-	-	-	-	-	-
1BC8	C	P28324	gi|4139948|pdb|1BC8|C	60	73.85	65	26	0	21	85	21	85	3e-22	84.7	16.5	0.7	82	93	59	'MOLECULE: DNA (5''-D(*TP*AP*CP*CP*GP*GP*AP*AP*GP*T)-3''); '	NP_068567.1	NP_068567	60	73.85	65	26	0	21	85	21	85	9e-20	90.5	IPR000418; IPR011991	Y	ELK4	9606 [Organism: human] [Scientific Name: Homo sapiens]	Y	26	1BC8-C	-	-	-	-	-	-	-	-	-
1BC8	C	P28324	gi|4139948|pdb|1BC8|C	60	73.85	65	26	0	21	85	21	85	3e-22	84.7	16.5	0.7	82	93	59	'MOLECULE: DNA (5''-D(*TP*AP*CP*CP*GP*GP*AP*AP*GP*T)-3''); '	NP_068567.1	NP_068567	60	73.85	65	26	0	21	85	21	85	9e-20	90.5	IPR000418; IPR011991	Y	ELK4	9606 [Organism: human] [Scientific Name: Homo sapiens]	Y	26	1BC8-C	-	-	-	-	-	-	-	-	-
1BC8	C	P28324	gi|4139948|pdb|1BC8|C	60	73.85	65	26	0	21	85	21	85	3e-22	84.7	16.5	0.7	82	93	59	'MOLECULE: DNA (5''-D(*TP*AP*CP*CP*GP*GP*AP*AP*GP*T)-3''); '	NP_068567.1	NP_068567	60	73.85	65	26	0	21	85	21	85	9e-20	90.5	IPR000418; IPR011991	Y	ELK4	9606 [Organism: human] [Scientific Name: Homo sapiens]	Y	26	1BC8-C	-	-	-	-	-	-	-	-	-
1BC8	C	P28324	gi|4139948|pdb|1BC8|C	60	73.85	65	26	0	21	85	21	85	3e-22	84.7	16.5	0.7	82	93	59	'MOLECULE: DNA (5''-D(*TP*AP*CP*CP*GP*GP*AP*AP*GP*T)-3''); '	NP_068567.1	NP_068567	60	73.85	65	26	0	21	85	21	85	9e-20	90.5	IPR000418; IPR011991	Y	ELK4	9606 [Organism: human] [Scientific Name: Homo sapiens]	Y	26	1BC8-C	-	-	-	-	-	-	-	-	-
1BC8	C	P28324	gi|4139948|pdb|1BC8|C	60	73.85	65	26	0	21	85	21	85	3e-22	84.7	16.5	0.7	82	93	59	'MOLECULE: DNA (5''-D(*TP*AP*CP*CP*GP*GP*AP*AP*GP*T)-3''); '	NP_068567.1	NP_068567	60	73.85	65	26	0	21	85	21	85	9e-20	90.5	IPR000418; IPR011991	Y	ELK4	9606 [Organism: human] [Scientific Name: Homo sapiens]	Y	26	1BC8-C	-	-	-	-	-	-	-	-	-
1BC8	C	P28324	gi|4139948|pdb|1BC8|C	60	73.85	65	26	0	21	85	21	85	3e-22	84.7	16.5	0.7	82	93	59	'MOLECULE: DNA (5''-D(*TP*AP*CP*CP*GP*GP*AP*AP*GP*T)-3''); '	NP_068567.1	NP_068567	60	73.85	65	26	0	21	85	21	85	9e-20	90.5	IPR000418; IPR011991	Y	ELK4	9606 [Organism: human] [Scientific Name: Homo sapiens]	Y	26	1BC8-C	-	-	-	-	-	-	-	-	-
1BC8	C	P28324	gi|4139948|pdb|1BC8|C	60	73.85	65	26	0	21	85	21	85	3e-22	84.7	16.5	0.7	82	93	59	'MOLECULE: DNA (5''-D(*TP*AP*CP*CP*GP*GP*AP*AP*GP*T)-3''); '	NP_068567.1	NP_068567	60	73.85	65	26	0	21	85	21	85	9e-20	90.5	IPR000418; IPR011991	Y	ELK4	9606 [Organism: human] [Scientific Name: Homo sapiens]	Y	26	1BC8-C	-	-	-	-	-	-	-	-	-
1BC8	C	P28324	gi|4139948|pdb|1BC8|C	60	73.85	65	26	0	21	85	21	85	3e-22	84.7	16.5	0.7	82	93	59	'MOLECULE: DNA (5''-D(*TP*AP*CP*CP*GP*GP*AP*AP*GP*T)-3''); '	NP_068567.1	NP_068567	60	73.85	65	26	0	21	85	21	85	9e-20	90.5	IPR000418; IPR011991	Y	ELK4	9606 [Organism: human] [Scientific Name: Homo sapiens]	Y	26	1BC8-C	-	-	-	-	-	-	-	-	-
1BC8	C	P28324	gi|4139948|pdb|1BC8|C	60	73.85	65	26	0	21	85	21	85	3e-22	84.7	16.5	0.7	82	93	59	'MOLECULE: DNA (5''-D(*TP*AP*CP*CP*GP*GP*AP*AP*GP*T)-3''); '	NP_068567.1	NP_068567	60	73.85	65	26	0	21	85	21	85	9e-20	90.5	IPR000418; IPR011991	Y	ELK4	9606 [Organism: human] [Scientific Name: Homo sapiens]	Y	26	1BC8-C	-	-	-	-	-	-	-	-	-
1BC8	C	P28324	gi|4139948|pdb|1BC8|C	60	73.85	65	26	0	21	85	21	85	3e-22	84.7	16.5	0.7	82	93	59	'MOLECULE: DNA (5''-D(*TP*AP*CP*CP*GP*GP*AP*AP*GP*T)-3''); '	NP_068567.1	NP_068567	60	73.85	65	26	0	21	85	21	85	9e-20	90.5	IPR000418; IPR011991	Y	ELK4	9606 [Organism: human] [Scientific Name: Homo sapiens]	Y	26	1BC8-C	-	-	-	-	-	-	-	-	-
1BC8	C	P28324	gi|4139948|pdb|1BC8|C	60	73.85	65	26	0	21	85	21	85	3e-22	84.7	16.5	0.7	82	93	59	'MOLECULE: DNA (5''-D(*TP*AP*CP*CP*GP*GP*AP*AP*GP*T)-3''); '	NP_068567.1	NP_068567	60	73.85	65	26	0	21	85	21	85	9e-20	90.5	IPR000418; IPR011991	Y	ELK4	9606 [Organism: human] [Scientific Name: Homo sapiens]	Y	26	1BC8-C	-	-	-	-	-	-	-	-	-
1BC8	C	P28324	gi|4139948|pdb|1BC8|C	60	73.85	65	26	0	21	85	21	85	3e-22	84.7	16.5	0.7	82	93	59	'MOLECULE: DNA (5''-D(*TP*AP*CP*CP*GP*GP*AP*AP*GP*T)-3''); '	NP_068567.1	NP_068567	60	73.85	65	26	0	21	85	21	85	9e-20	90.5	IPR000418; IPR011991	Y	ELK4	9606 [Organism: human] [Scientific Name: Homo sapiens]	Y	26	1BC8-C	-	-	-	-	-	-	-	-	-
1BC8	C	P28324	gi|4139948|pdb|1BC8|C	60	73.85	65	26	0	21	85	21	85	3e-22	84.7	16.5	0.7	82	93	59	'MOLECULE: DNA (5''-D(*TP*AP*CP*CP*GP*GP*AP*AP*GP*T)-3''); '	NP_068567.1	NP_068567	60	73.85	65	26	0	21	85	21	85	9e-20	90.5	IPR000418; IPR011991	Y	ELK4	9606 [Organism: human] [Scientific Name: Homo sapiens]	Y	26	1BC8-C	-	-	-	-	-	-	-	-	-
1BC8	C	P28324	gi|4139948|pdb|1BC8|C	60	73.85	65	26	0	21	85	21	85	3e-22	84.7	16.5	0.7	82	93	59	'MOLECULE: DNA (5''-D(*TP*AP*CP*CP*GP*GP*AP*AP*GP*T)-3''); '	NP_068567.1	NP_068567	60	73.85	65	26	0	21	85	21	85	9e-20	90.5	IPR000418; IPR011991	Y	ELK4	9606 [Organism: human] [Scientific Name: Homo sapiens]	Y	26	1BC8-C	-	-	-	-	-	-	-	-	-
1BC8	C	P28324	gi|4139948|pdb|1BC8|C	60	73.85	65	26	0	21	85	21	85	3e-22	84.7	16.5	0.7	82	93	59	'MOLECULE: DNA (5''-D(*TP*AP*CP*CP*GP*GP*AP*AP*GP*T)-3''); '	NP_068567.1	NP_068567	60	73.85	65	26	0	21	85	21	85	9e-20	90.5	IPR000418; IPR011991	Y	ELK4	9606 [Organism: human] [Scientific Name: Homo sapiens]	Y	26	1BC8-C	-	-	-	-	-	-	-	-	-
1BC8	C	P28324	gi|4139948|pdb|1BC8|C	60	73.85	65	26	0	21	85	21	85	3e-22	84.7	16.5	0.7	82	93	59	'MOLECULE: DNA (5''-D(*TP*AP*CP*CP*GP*GP*AP*AP*GP*T)-3''); '	NP_068567.1	NP_068567	60	73.85	65	26	0	21	85	21	85	9e-20	90.5	IPR000418; IPR011991	Y	ELK4	9606 [Organism: human] [Scientific Name: Homo sapiens]	Y	26	1BC8-C	-	-	-	-	-	-	-	-	-
1BC8	C	P28324	gi|4139948|pdb|1BC8|C	60	73.85	65	26	0	21	85	21	85	3e-22	84.7	16.5	0.7	82	93	59	'MOLECULE: DNA (5''-D(*TP*AP*CP*CP*GP*GP*AP*AP*GP*T)-3''); '	NP_068567.1	NP_068567	60	73.85	65	26	0	21	85	21	85	9e-20	90.5	IPR000418; IPR011991	Y	ELK4	9606 [Organism: human] [Scientific Name: Homo sapiens]	Y	26	1BC8-C	-	-	-	-	-	-	-	-	-
1BC8	C	P28324	gi|4139948|pdb|1BC8|C	60	73.85	65	26	0	21	85	21	85	3e-22	84.7	16.5	0.7	82	93	59	'MOLECULE: DNA (5''-D(*TP*AP*CP*CP*GP*GP*AP*AP*GP*T)-3''); '	NP_068567.1	NP_068567	60	73.85	65	26	0	21	85	21	85	9e-20	90.5	IPR000418; IPR011991	Y	ELK4	9606 [Organism: human] [Scientific Name: Homo sapiens]	Y	26	1BC8-C	-	-	-	-	-	-	-	-	-
1BC8	C	P28324	gi|4139948|pdb|1BC8|C	60	73.85	65	26	0	21	85	21	85	3e-22	84.7	16.5	0.7	82	93	59	'MOLECULE: DNA (5''-D(*TP*AP*CP*CP*GP*GP*AP*AP*GP*T)-3''); '	NP_068567.1	NP_068567	60	73.85	65	26	0	21	85	21	85	9e-20	90.5	IPR000418; IPR011991	Y	ELK4	9606 [Organism: human] [Scientific Name: Homo sapiens]	Y	26	1BC8-C	-	-	-	-	-	-	-	-	-
1BC8	C	P28324	gi|4139948|pdb|1BC8|C	60	73.85	65	26	0	21	85	21	85	3e-22	84.7	16.5	0.7	82	93	59	'MOLECULE: DNA (5''-D(*TP*AP*CP*CP*GP*GP*AP*AP*GP*T)-3''); '	NP_068567.1	NP_068567	60	73.85	65	26	0	21	85	21	85	9e-20	90.5	IPR000418; IPR011991	Y	ELK4	9606 [Organism: human] [Scientific Name: Homo sapiens]	Y	26	1BC8-C	-	-	-	-	-	-	-	-	-
1BC8	C	P28324	gi|4139948|pdb|1BC8|C	60	73.85	65	26	0	21	85	21	85	3e-22	84.7	16.5	0.7	82	93	59	'MOLECULE: DNA (5''-D(*TP*AP*CP*CP*GP*GP*AP*AP*GP*T)-3''); '	NP_068567.1	NP_068567	60	73.85	65	26	0	21	85	21	85	9e-20	90.5	IPR000418; IPR011991	Y	ELK4	9606 [Organism: human] [Scientific Name: Homo sapiens]	Y	26	1BC8-C	-	-	-	-	-	-	-	-	-
1BC8	C	P28324	gi|4139948|pdb|1BC8|C	60	73.85	65	26	0	21	85	21	85	3e-22	84.7	16.5	0.7	82	93	59	'MOLECULE: DNA (5''-D(*TP*AP*CP*CP*GP*GP*AP*AP*GP*T)-3''); '	NP_068567.1	NP_068567	60	73.85	65	26	0	21	85	21	85	9e-20	90.5	IPR000418; IPR011991	Y	ELK4	9606 [Organism: human] [Scientific Name: Homo sapiens]	Y	26	1BC8-C	-	-	-	-	-	-	-	-	-
1BC8	C	P28324	gi|4139948|pdb|1BC8|C	60	73.85	65	26	0	21	85	21	85	3e-22	84.7	16.5	0.7	82	93	59	'MOLECULE: DNA (5''-D(*TP*AP*CP*CP*GP*GP*AP*AP*GP*T)-3''); '	NP_068567.1	NP_068567	60	73.85	65	26	0	21	85	21	85	9e-20	90.5	IPR000418; IPR011991	Y	ELK4	9606 [Organism: human] [Scientific Name: Homo sapiens]	Y	26	1BC8-C	-	-	-	-	-	-	-	-	-
1BC8	C	P28324	gi|4139948|pdb|1BC8|C	60	73.85	65	26	0	21	85	21	85	3e-22	84.7	16.5	0.7	82	93	59	'MOLECULE: DNA (5''-D(*TP*AP*CP*CP*GP*GP*AP*AP*GP*T)-3''); '	NP_068567.1	NP_068567	60	73.85	65	26	0	21	85	21	85	9e-20	90.5	IPR000418; IPR011991	Y	ELK4	9606 [Organism: human] [Scientific Name: Homo sapiens]	Y	26	1BC8-C	-	-	-	-	-	-	-	-	-
1BC8	C	P28324	gi|4139948|pdb|1BC8|C	60	73.85	65	26	0	21	85	21	85	3e-22	84.7	16.5	0.7	82	93	59	'MOLECULE: DNA (5''-D(*TP*AP*CP*CP*GP*GP*AP*AP*GP*T)-3''); '	NP_068567.1	NP_068567	60	73.85	65	26	0	21	85	21	85	9e-20	90.5	IPR000418; IPR011991	Y	ELK4	9606 [Organism: human] [Scientific Name: Homo sapiens]	Y	26	1BC8-C	-	-	-	-	-	-	-	-	-
1BC8	C	P28324	gi|4139948|pdb|1BC8|C	60	73.85	65	26	0	21	85	21	85	3e-22	84.7	16.5	0.7	82	93	59	'MOLECULE: DNA (5''-D(*TP*AP*CP*CP*GP*GP*AP*AP*GP*T)-3''); '	NP_068567.1	NP_068567	60	73.85	65	26	0	21	85	21	85	9e-20	90.5	IPR000418; IPR011991	Y	ELK4	9606 [Organism: human] [Scientific Name: Homo sapiens]	Y	26	1BC8-C	-	-	-	-	-	-	-	-	-
1BC8	C	P28324	gi|4139948|pdb|1BC8|C	60	73.85	65	26	0	21	85	21	85	3e-22	84.7	16.5	0.7	82	93	59	'MOLECULE: DNA (5''-D(*TP*AP*CP*CP*GP*GP*AP*AP*GP*T)-3''); '	NP_068567.1	NP_068567	60	73.85	65	26	0	21	85	21	85	9e-20	90.5	IPR000418; IPR011991	Y	ELK4	9606 [Organism: human] [Scientific Name: Homo sapiens]	Y	26	1BC8-C	-	-	-	-	-	-	-	-	-
1BC8	C	P28324	gi|4139948|pdb|1BC8|C	60	73.85	65	26	0	21	85	21	85	3e-22	84.7	16.5	0.7	82	93	59	'MOLECULE: DNA (5''-D(*TP*AP*CP*CP*GP*GP*AP*AP*GP*T)-3''); '	NP_068567.1	NP_068567	60	73.85	65	26	0	21	85	21	85	9e-20	90.5	IPR000418; IPR011991	Y	ELK4	9606 [Organism: human] [Scientific Name: Homo sapiens]	Y	26	1BC8-C	-	-	-	-	-	-	-	-	-
1BC8	C	P28324	gi|4139948|pdb|1BC8|C	60	73.85	65	26	0	21	85	21	85	3e-22	84.7	16.5	0.7	82	93	59	'MOLECULE: DNA (5''-D(*TP*AP*CP*CP*GP*GP*AP*AP*GP*T)-3''); '	NP_068567.1	NP_068567	60	73.85	65	26	0	21	85	21	85	9e-20	90.5	IPR000418; IPR011991	Y	ELK4	9606 [Organism: human] [Scientific Name: Homo sapiens]	Y	26	1BC8-C	-	-	-	-	-	-	-	-	-
1BC8	C	P28324	gi|4139948|pdb|1BC8|C	60	73.85	65	26	0	21	85	21	85	3e-22	84.7	16.5	0.7	82	93	59	'MOLECULE: DNA (5''-D(*TP*AP*CP*CP*GP*GP*AP*AP*GP*T)-3''); '	NP_068567.1	NP_068567	60	73.85	65	26	0	21	85	21	85	9e-20	90.5	IPR000418; IPR011991	Y	ELK4	9606 [Organism: human] [Scientific Name: Homo sapiens]	Y	26	1BC8-C	-	-	-	-	-	-	-	-	-
1BC8	C	P28324	gi|4139948|pdb|1BC8|C	60	73.85	65	26	0	21	85	21	85	3e-22	84.7	16.5	0.7	82	93	59	'MOLECULE: DNA (5''-D(*TP*AP*CP*CP*GP*GP*AP*AP*GP*T)-3''); '	NP_068567.1	NP_068567	60	73.85	65	26	0	21	85	21	85	9e-20	90.5	IPR000418; IPR011991	Y	ELK4	9606 [Organism: human] [Scientific Name: Homo sapiens]	Y	26	1BC8-C	-	-	-	-	-	-	-	-	-
1BC8	C	P28324	gi|4139948|pdb|1BC8|C	60	73.85	65	26	0	21	85	21	85	3e-22	84.7	16.5	0.7	82	93	59	'MOLECULE: DNA (5''-D(*TP*AP*CP*CP*GP*GP*AP*AP*GP*T)-3''); '	NP_068567.1	NP_068567	60	73.85	65	26	0	21	85	21	85	9e-20	90.5	IPR000418; IPR011991	Y	ELK4	9606 [Organism: human] [Scientific Name: Homo sapiens]	Y	26	1BC8-C	-	-	-	-	-	-	-	-	-
1BC8	C	P28324	gi|4139948|pdb|1BC8|C	60	73.85	65	26	0	21	85	21	85	3e-22	84.7	16.5	0.7	82	93	59	'MOLECULE: DNA (5''-D(*TP*AP*CP*CP*GP*GP*AP*AP*GP*T)-3''); '	NP_068567.1	NP_068567	60	73.85	65	26	0	21	85	21	85	9e-20	90.5	IPR000418; IPR011991	Y	ELK4	9606 [Organism: human] [Scientific Name: Homo sapiens]	Y	26	1BC8-C	-	-	-	-	-	-	-	-	-
1BC8	C	P28324	gi|4139948|pdb|1BC8|C	60	73.85	65	26	0	21	85	21	85	3e-22	84.7	16.5	0.7	82	93	59	'MOLECULE: DNA (5''-D(*TP*AP*CP*CP*GP*GP*AP*AP*GP*T)-3''); '	NP_068567.1	NP_068567	60	73.85	65	26	0	21	85	21	85	9e-20	90.5	IPR000418; IPR011991	Y	ELK4	9606 [Organism: human] [Scientific Name: Homo sapiens]	Y	26	1BC8-C	-	-	-	-	-	-	-	-	-
1BC8	C	P28324	gi|4139948|pdb|1BC8|C	60	73.85	65	26	0	21	85	21	85	3e-22	84.7	16.5	0.7	82	93	59	'MOLECULE: DNA (5''-D(*TP*AP*CP*CP*GP*GP*AP*AP*GP*T)-3''); '	NP_068567.1	NP_068567	60	73.85	65	26	0	21	85	21	85	9e-20	90.5	IPR000418; IPR011991	Y	ELK4	9606 [Organism: human] [Scientific Name: Homo sapiens]	Y	26	1BC8-C	-	-	-	-	-	-	-	-	-
1BC8	C	P28324	gi|4139948|pdb|1BC8|C	60	73.85	65	26	0	21	85	21	85	3e-22	84.7	16.5	0.7	82	93	59	'MOLECULE: DNA (5''-D(*TP*AP*CP*CP*GP*GP*AP*AP*GP*T)-3''); '	NP_068567.1	NP_068567	60	73.85	65	26	0	21	85	21	85	9e-20	90.5	IPR000418; IPR011991	Y	ELK4	9606 [Organism: human] [Scientific Name: Homo sapiens]	Y	26	1BC8-C	-	-	-	-	-	-	-	-	-
1BC8	C	P28324	gi|4139948|pdb|1BC8|C	60	73.85	65	26	0	21	85	21	85	3e-22	84.7	16.5	0.7	82	93	59	'MOLECULE: DNA (5''-D(*TP*AP*CP*CP*GP*GP*AP*AP*GP*T)-3''); '	NP_068567.1	NP_068567	60	73.85	65	26	0	21	85	21	85	9e-20	90.5	IPR000418; IPR011991	Y	ELK4	9606 [Organism: human] [Scientific Name: Homo sapiens]	Y	26	1BC8-C	-	-	-	-	-	-	-	-	-
1BC8	C	P28324	gi|4139948|pdb|1BC8|C	60	73.85	65	26	0	21	85	21	85	3e-22	84.7	16.5	0.7	82	93	59	'MOLECULE: DNA (5''-D(*TP*AP*CP*CP*GP*GP*AP*AP*GP*T)-3''); '	NP_068567.1	NP_068567	60	73.85	65	26	0	21	85	21	85	9e-20	90.5	IPR000418; IPR011991	Y	ELK4	9606 [Organism: human] [Scientific Name: Homo sapiens]	Y	26	1BC8-C	-	-	-	-	-	-	-	-	-
1BC8	C	P28324	gi|4139948|pdb|1BC8|C	60	73.85	65	26	0	21	85	21	85	3e-22	84.7	16.5	0.7	82	93	59	'MOLECULE: DNA (5''-D(*TP*AP*CP*CP*GP*GP*AP*AP*GP*T)-3''); '	NP_068567.1	NP_068567	60	73.85	65	26	0	21	85	21	85	9e-20	90.5	IPR000418; IPR011991	Y	ELK4	9606 [Organism: human] [Scientific Name: Homo sapiens]	Y	26	1BC8-C	-	-	-	-	-	-	-	-	-
1BC8	C	P28324	gi|4139948|pdb|1BC8|C	60	73.85	65	26	0	21	85	21	85	3e-22	84.7	16.5	0.7	82	93	59	'MOLECULE: DNA (5''-D(*TP*AP*CP*CP*GP*GP*AP*AP*GP*T)-3''); '	NP_068567.1	NP_068567	60	73.85	65	26	0	21	85	21	85	9e-20	90.5	IPR000418; IPR011991	Y	ELK4	9606 [Organism: human] [Scientific Name: Homo sapiens]	Y	26	1BC8-C	-	-	-	-	-	-	-	-	-
1BC8	C	P28324	gi|4139948|pdb|1BC8|C	60	73.85	65	26	0	21	85	21	85	3e-22	84.7	16.5	0.7	82	93	59	'MOLECULE: DNA (5''-D(*TP*AP*CP*CP*GP*GP*AP*AP*GP*T)-3''); '	NP_068567.1	NP_068567	60	73.85	65	26	0	21	85	21	85	9e-20	90.5	IPR000418; IPR011991	Y	ELK4	9606 [Organism: human] [Scientific Name: Homo sapiens]	Y	26	1BC8-C	-	-	-	-	-	-	-	-	-
1BC8	C	P28324	gi|4139948|pdb|1BC8|C	60	73.85	65	26	0	21	85	21	85	3e-22	84.7	16.5	0.7	82	93	59	'MOLECULE: DNA (5''-D(*TP*AP*CP*CP*GP*GP*AP*AP*GP*T)-3''); '	NP_068567.1	NP_068567	60	73.85	65	26	0	21	85	21	85	9e-20	90.5	IPR000418; IPR011991	Y	ELK4	9606 [Organism: human] [Scientific Name: Homo sapiens]	Y	26	1BC8-C	-	-	-	-	-	-	-	-	-
1BC8	C	P28324	gi|4139948|pdb|1BC8|C	60	73.85	65	26	0	21	85	21	85	3e-22	84.7	16.5	0.7	82	93	59	'MOLECULE: DNA (5''-D(*TP*AP*CP*CP*GP*GP*AP*AP*GP*T)-3''); '	NP_068567.1	NP_068567	60	73.85	65	26	0	21	85	21	85	9e-20	90.5	IPR000418; IPR011991	Y	ELK4	9606 [Organism: human] [Scientific Name: Homo sapiens]	Y	26	1BC8-C	-	-	-	-	-	-	-	-	-
1BC8	C	P28324	gi|4139948|pdb|1BC8|C	60	73.85	65	26	0	21	85	21	85	3e-22	84.7	16.5	0.7	82	93	59	'MOLECULE: DNA (5''-D(*TP*AP*CP*CP*GP*GP*AP*AP*GP*T)-3''); '	NP_068567.1	NP_068567	60	73.85	65	26	0	21	85	21	85	9e-20	90.5	IPR000418; IPR011991	Y	ELK4	9606 [Organism: human] [Scientific Name: Homo sapiens]	Y	26	1BC8-C	-	-	-	-	-	-	-	-	-
1BC8	C	P28324	gi|4139948|pdb|1BC8|C	60	73.85	65	26	0	21	85	21	85	3e-22	84.7	16.5	0.7	82	93	59	'MOLECULE: DNA (5''-D(*TP*AP*CP*CP*GP*GP*AP*AP*GP*T)-3''); '	NP_068567.1	NP_068567	60	73.85	65	26	0	21	85	21	85	9e-20	90.5	IPR000418; IPR011991	Y	ELK4	9606 [Organism: human] [Scientific Name: Homo sapiens]	Y	26	1BC8-C	-	-	-	-	-	-	-	-	-
1BC7	C	P28324	gi|4139945|pdb|1BC7|C	60	73.85	65	26	0	21	85	21	85	3e-22	84.7	16.6	1.5	84	93	57	'MOLECULE: DNA (5''-D(*GP*AP*CP*AP*GP*GP*AP*TP*GP*TP*G)-3''); '	NP_001964.2	NP_001964	60	73.85	65	26	0	21	85	21	85	1e-19	90.5	IPR000418; IPR011991	Y	ELK4	9606 [Organism: human] [Scientific Name: Homo sapiens]	Y	26	1BC8-C	-	-	-	-	-	-	-	-	-
1BC7	C	P28324	gi|4139945|pdb|1BC7|C	60	73.85	65	26	0	21	85	21	85	3e-22	84.7	16.6	1.5	84	93	57	'MOLECULE: DNA (5''-D(*GP*AP*CP*AP*GP*GP*AP*TP*GP*TP*G)-3''); '	NP_001964.2	NP_001964	60	73.85	65	26	0	21	85	21	85	1e-19	90.5	IPR000418; IPR011991	Y	ELK4	9606 [Organism: human] [Scientific Name: Homo sapiens]	Y	26	1BC8-C	-	-	-	-	-	-	-	-	-
1BC7	C	P28324	gi|4139945|pdb|1BC7|C	60	73.85	65	26	0	21	85	21	85	3e-22	84.7	16.6	1.5	84	93	57	'MOLECULE: DNA (5''-D(*GP*AP*CP*AP*GP*GP*AP*TP*GP*TP*G)-3''); '	NP_001964.2	NP_001964	60	73.85	65	26	0	21	85	21	85	1e-19	90.5	IPR000418; IPR011991	Y	ELK4	9606 [Organism: human] [Scientific Name: Homo sapiens]	Y	26	1BC8-C	-	-	-	-	-	-	-	-	-
1BC7	C	P28324	gi|4139945|pdb|1BC7|C	60	73.85	65	26	0	21	85	21	85	3e-22	84.7	16.6	1.5	84	93	57	'MOLECULE: DNA (5''-D(*GP*AP*CP*AP*GP*GP*AP*TP*GP*TP*G)-3''); '	NP_001964.2	NP_001964	60	73.85	65	26	0	21	85	21	85	1e-19	90.5	IPR000418; IPR011991	Y	ELK4	9606 [Organism: human] [Scientific Name: Homo sapiens]	Y	26	1BC8-C	-	-	-	-	-	-	-	-	-
1BC7	C	P28324	gi|4139945|pdb|1BC7|C	60	73.85	65	26	0	21	85	21	85	3e-22	84.7	16.6	1.5	84	93	57	'MOLECULE: DNA (5''-D(*GP*AP*CP*AP*GP*GP*AP*TP*GP*TP*G)-3''); '	NP_001964.2	NP_001964	60	73.85	65	26	0	21	85	21	85	1e-19	90.5	IPR000418; IPR011991	Y	ELK4	9606 [Organism: human] [Scientific Name: Homo sapiens]	Y	26	1BC8-C	-	-	-	-	-	-	-	-	-
1BC7	C	P28324	gi|4139945|pdb|1BC7|C	60	73.85	65	26	0	21	85	21	85	3e-22	84.7	16.6	1.5	84	93	57	'MOLECULE: DNA (5''-D(*GP*AP*CP*AP*GP*GP*AP*TP*GP*TP*G)-3''); '	NP_001964.2	NP_001964	60	73.85	65	26	0	21	85	21	85	1e-19	90.5	IPR000418; IPR011991	Y	ELK4	9606 [Organism: human] [Scientific Name: Homo sapiens]	Y	26	1BC8-C	-	-	-	-	-	-	-	-	-
1BC7	C	P28324	gi|4139945|pdb|1BC7|C	60	73.85	65	26	0	21	85	21	85	3e-22	84.7	16.6	1.5	84	93	57	'MOLECULE: DNA (5''-D(*GP*AP*CP*AP*GP*GP*AP*TP*GP*TP*G)-3''); '	NP_001964.2	NP_001964	60	73.85	65	26	0	21	85	21	85	1e-19	90.5	IPR000418; IPR011991	Y	ELK4	9606 [Organism: human] [Scientific Name: Homo sapiens]	Y	26	1BC8-C	-	-	-	-	-	-	-	-	-
1BC7	C	P28324	gi|4139945|pdb|1BC7|C	60	73.85	65	26	0	21	85	21	85	3e-22	84.7	16.6	1.5	84	93	57	'MOLECULE: DNA (5''-D(*GP*AP*CP*AP*GP*GP*AP*TP*GP*TP*G)-3''); '	NP_001964.2	NP_001964	60	73.85	65	26	0	21	85	21	85	1e-19	90.5	IPR000418; IPR011991	Y	ELK4	9606 [Organism: human] [Scientific Name: Homo sapiens]	Y	26	1BC8-C	-	-	-	-	-	-	-	-	-
1BC7	C	P28324	gi|4139945|pdb|1BC7|C	60	73.85	65	26	0	21	85	21	85	3e-22	84.7	16.6	1.5	84	93	57	'MOLECULE: DNA (5''-D(*GP*AP*CP*AP*GP*GP*AP*TP*GP*TP*G)-3''); '	NP_001964.2	NP_001964	60	73.85	65	26	0	21	85	21	85	1e-19	90.5	IPR000418; IPR011991	Y	ELK4	9606 [Organism: human] [Scientific Name: Homo sapiens]	Y	26	1BC8-C	-	-	-	-	-	-	-	-	-
1BC7	C	P28324	gi|4139945|pdb|1BC7|C	60	73.85	65	26	0	21	85	21	85	3e-22	84.7	16.6	1.5	84	93	57	'MOLECULE: DNA (5''-D(*GP*AP*CP*AP*GP*GP*AP*TP*GP*TP*G)-3''); '	NP_001964.2	NP_001964	60	73.85	65	26	0	21	85	21	85	1e-19	90.5	IPR000418; IPR011991	Y	ELK4	9606 [Organism: human] [Scientific Name: Homo sapiens]	Y	26	1BC8-C	-	-	-	-	-	-	-	-	-
1BC7	C	P28324	gi|4139945|pdb|1BC7|C	60	73.85	65	26	0	21	85	21	85	3e-22	84.7	16.6	1.5	84	93	57	'MOLECULE: DNA (5''-D(*GP*AP*CP*AP*GP*GP*AP*TP*GP*TP*G)-3''); '	NP_001964.2	NP_001964	60	73.85	65	26	0	21	85	21	85	1e-19	90.5	IPR000418; IPR011991	Y	ELK4	9606 [Organism: human] [Scientific Name: Homo sapiens]	Y	26	1BC8-C	-	-	-	-	-	-	-	-	-
1BC7	C	P28324	gi|4139945|pdb|1BC7|C	60	73.85	65	26	0	21	85	21	85	3e-22	84.7	16.6	1.5	84	93	57	'MOLECULE: DNA (5''-D(*GP*AP*CP*AP*GP*GP*AP*TP*GP*TP*G)-3''); '	NP_001964.2	NP_001964	60	73.85	65	26	0	21	85	21	85	1e-19	90.5	IPR000418; IPR011991	Y	ELK4	9606 [Organism: human] [Scientific Name: Homo sapiens]	Y	26	1BC8-C	-	-	-	-	-	-	-	-	-
1BC7	C	P28324	gi|4139945|pdb|1BC7|C	60	73.85	65	26	0	21	85	21	85	3e-22	84.7	16.6	1.5	84	93	57	'MOLECULE: DNA (5''-D(*GP*AP*CP*AP*GP*GP*AP*TP*GP*TP*G)-3''); '	NP_001964.2	NP_001964	60	73.85	65	26	0	21	85	21	85	1e-19	90.5	IPR000418; IPR011991	Y	ELK4	9606 [Organism: human] [Scientific Name: Homo sapiens]	Y	26	1BC8-C	-	-	-	-	-	-	-	-	-
1BC7	C	P28324	gi|4139945|pdb|1BC7|C	60	73.85	65	26	0	21	85	21	85	3e-22	84.7	16.6	1.5	84	93	57	'MOLECULE: DNA (5''-D(*GP*AP*CP*AP*GP*GP*AP*TP*GP*TP*G)-3''); '	NP_001964.2	NP_001964	60	73.85	65	26	0	21	85	21	85	1e-19	90.5	IPR000418; IPR011991	Y	ELK4	9606 [Organism: human] [Scientific Name: Homo sapiens]	Y	26	1BC8-C	-	-	-	-	-	-	-	-	-
1BC7	C	P28324	gi|4139945|pdb|1BC7|C	60	73.85	65	26	0	21	85	21	85	3e-22	84.7	16.6	1.5	84	93	57	'MOLECULE: DNA (5''-D(*GP*AP*CP*AP*GP*GP*AP*TP*GP*TP*G)-3''); '	NP_001964.2	NP_001964	60	73.85	65	26	0	21	85	21	85	1e-19	90.5	IPR000418; IPR011991	Y	ELK4	9606 [Organism: human] [Scientific Name: Homo sapiens]	Y	26	1BC8-C	-	-	-	-	-	-	-	-	-
1BC7	C	P28324	gi|4139945|pdb|1BC7|C	60	73.85	65	26	0	21	85	21	85	3e-22	84.7	16.6	1.5	84	93	57	'MOLECULE: DNA (5''-D(*GP*AP*CP*AP*GP*GP*AP*TP*GP*TP*G)-3''); '	NP_001964.2	NP_001964	60	73.85	65	26	0	21	85	21	85	1e-19	90.5	IPR000418; IPR011991	Y	ELK4	9606 [Organism: human] [Scientific Name: Homo sapiens]	Y	26	1BC8-C	-	-	-	-	-	-	-	-	-
1BC7	C	P28324	gi|4139945|pdb|1BC7|C	60	73.85	65	26	0	21	85	21	85	3e-22	84.7	16.6	1.5	84	93	57	'MOLECULE: DNA (5''-D(*GP*AP*CP*AP*GP*GP*AP*TP*GP*TP*G)-3''); '	NP_001964.2	NP_001964	60	73.85	65	26	0	21	85	21	85	1e-19	90.5	IPR000418; IPR011991	Y	ELK4	9606 [Organism: human] [Scientific Name: Homo sapiens]	Y	26	1BC8-C	-	-	-	-	-	-	-	-	-
1BC7	C	P28324	gi|4139945|pdb|1BC7|C	60	73.85	65	26	0	21	85	21	85	3e-22	84.7	16.6	1.5	84	93	57	'MOLECULE: DNA (5''-D(*GP*AP*CP*AP*GP*GP*AP*TP*GP*TP*G)-3''); '	NP_001964.2	NP_001964	60	73.85	65	26	0	21	85	21	85	1e-19	90.5	IPR000418; IPR011991	Y	ELK4	9606 [Organism: human] [Scientific Name: Homo sapiens]	Y	26	1BC8-C	-	-	-	-	-	-	-	-	-
1BC7	C	P28324	gi|4139945|pdb|1BC7|C	60	73.85	65	26	0	21	85	21	85	3e-22	84.7	16.6	1.5	84	93	57	'MOLECULE: DNA (5''-D(*GP*AP*CP*AP*GP*GP*AP*TP*GP*TP*G)-3''); '	NP_001964.2	NP_001964	60	73.85	65	26	0	21	85	21	85	1e-19	90.5	IPR000418; IPR011991	Y	ELK4	9606 [Organism: human] [Scientific Name: Homo sapiens]	Y	26	1BC8-C	-	-	-	-	-	-	-	-	-
1BC7	C	P28324	gi|4139945|pdb|1BC7|C	60	73.85	65	26	0	21	85	21	85	3e-22	84.7	16.6	1.5	84	93	57	'MOLECULE: DNA (5''-D(*GP*AP*CP*AP*GP*GP*AP*TP*GP*TP*G)-3''); '	NP_001964.2	NP_001964	60	73.85	65	26	0	21	85	21	85	1e-19	90.5	IPR000418; IPR011991	Y	ELK4	9606 [Organism: human] [Scientific Name: Homo sapiens]	Y	26	1BC8-C	-	-	-	-	-	-	-	-	-
1BC7	C	P28324	gi|4139945|pdb|1BC7|C	60	73.85	65	26	0	21	85	21	85	3e-22	84.7	16.6	1.5	84	93	57	'MOLECULE: DNA (5''-D(*GP*AP*CP*AP*GP*GP*AP*TP*GP*TP*G)-3''); '	NP_001964.2	NP_001964	60	73.85	65	26	0	21	85	21	85	1e-19	90.5	IPR000418; IPR011991	Y	ELK4	9606 [Organism: human] [Scientific Name: Homo sapiens]	Y	26	1BC8-C	-	-	-	-	-	-	-	-	-
1BC7	C	P28324	gi|4139945|pdb|1BC7|C	60	73.85	65	26	0	21	85	21	85	3e-22	84.7	16.6	1.5	84	93	57	'MOLECULE: DNA (5''-D(*GP*AP*CP*AP*GP*GP*AP*TP*GP*TP*G)-3''); '	NP_001964.2	NP_001964	60	73.85	65	26	0	21	85	21	85	1e-19	90.5	IPR000418; IPR011991	Y	ELK4	9606 [Organism: human] [Scientific Name: Homo sapiens]	Y	26	1BC8-C	-	-	-	-	-	-	-	-	-
1BC7	C	P28324	gi|4139945|pdb|1BC7|C	60	73.85	65	26	0	21	85	21	85	3e-22	84.7	16.6	1.5	84	93	57	'MOLECULE: DNA (5''-D(*GP*AP*CP*AP*GP*GP*AP*TP*GP*TP*G)-3''); '	NP_001964.2	NP_001964	60	73.85	65	26	0	21	85	21	85	1e-19	90.5	IPR000418; IPR011991	Y	ELK4	9606 [Organism: human] [Scientific Name: Homo sapiens]	Y	26	1BC8-C	-	-	-	-	-	-	-	-	-
1BC7	C	P28324	gi|4139945|pdb|1BC7|C	60	73.85	65	26	0	21	85	21	85	3e-22	84.7	16.6	1.5	84	93	57	'MOLECULE: DNA (5''-D(*GP*AP*CP*AP*GP*GP*AP*TP*GP*TP*G)-3''); '	NP_001964.2	NP_001964	60	73.85	65	26	0	21	85	21	85	1e-19	90.5	IPR000418; IPR011991	Y	ELK4	9606 [Organism: human] [Scientific Name: Homo sapiens]	Y	26	1BC8-C	-	-	-	-	-	-	-	-	-
1BC7	C	P28324	gi|4139945|pdb|1BC7|C	60	73.85	65	26	0	21	85	21	85	3e-22	84.7	16.6	1.5	84	93	57	'MOLECULE: DNA (5''-D(*GP*AP*CP*AP*GP*GP*AP*TP*GP*TP*G)-3''); '	NP_001964.2	NP_001964	60	73.85	65	26	0	21	85	21	85	1e-19	90.5	IPR000418; IPR011991	Y	ELK4	9606 [Organism: human] [Scientific Name: Homo sapiens]	Y	26	1BC8-C	-	-	-	-	-	-	-	-	-
1BC7	C	P28324	gi|4139945|pdb|1BC7|C	60	73.85	65	26	0	21	85	21	85	3e-22	84.7	16.6	1.5	84	93	57	'MOLECULE: DNA (5''-D(*GP*AP*CP*AP*GP*GP*AP*TP*GP*TP*G)-3''); '	NP_001964.2	NP_001964	60	73.85	65	26	0	21	85	21	85	1e-19	90.5	IPR000418; IPR011991	Y	ELK4	9606 [Organism: human] [Scientific Name: Homo sapiens]	Y	26	1BC8-C	-	-	-	-	-	-	-	-	-
1BC7	C	P28324	gi|4139945|pdb|1BC7|C	60	73.85	65	26	0	21	85	21	85	3e-22	84.7	16.6	1.5	84	93	57	'MOLECULE: DNA (5''-D(*GP*AP*CP*AP*GP*GP*AP*TP*GP*TP*G)-3''); '	NP_001964.2	NP_001964	60	73.85	65	26	0	21	85	21	85	1e-19	90.5	IPR000418; IPR011991	Y	ELK4	9606 [Organism: human] [Scientific Name: Homo sapiens]	Y	26	1BC8-C	-	-	-	-	-	-	-	-	-
1BC7	C	P28324	gi|4139945|pdb|1BC7|C	60	73.85	65	26	0	21	85	21	85	3e-22	84.7	16.6	1.5	84	93	57	'MOLECULE: DNA (5''-D(*GP*AP*CP*AP*GP*GP*AP*TP*GP*TP*G)-3''); '	NP_001964.2	NP_001964	60	73.85	65	26	0	21	85	21	85	1e-19	90.5	IPR000418; IPR011991	Y	ELK4	9606 [Organism: human] [Scientific Name: Homo sapiens]	Y	26	1BC8-C	-	-	-	-	-	-	-	-	-
1BC7	C	P28324	gi|4139945|pdb|1BC7|C	60	73.85	65	26	0	21	85	21	85	3e-22	84.7	16.6	1.5	84	93	57	'MOLECULE: DNA (5''-D(*GP*AP*CP*AP*GP*GP*AP*TP*GP*TP*G)-3''); '	NP_001964.2	NP_001964	60	73.85	65	26	0	21	85	21	85	1e-19	90.5	IPR000418; IPR011991	Y	ELK4	9606 [Organism: human] [Scientific Name: Homo sapiens]	Y	26	1BC8-C	-	-	-	-	-	-	-	-	-
1BC7	C	P28324	gi|4139945|pdb|1BC7|C	60	73.85	65	26	0	21	85	21	85	3e-22	84.7	16.6	1.5	84	93	57	'MOLECULE: DNA (5''-D(*GP*AP*CP*AP*GP*GP*AP*TP*GP*TP*G)-3''); '	NP_001964.2	NP_001964	60	73.85	65	26	0	21	85	21	85	1e-19	90.5	IPR000418; IPR011991	Y	ELK4	9606 [Organism: human] [Scientific Name: Homo sapiens]	Y	26	1BC8-C	-	-	-	-	-	-	-	-	-
1BC7	C	P28324	gi|4139945|pdb|1BC7|C	60	73.85	65	26	0	21	85	21	85	3e-22	84.7	16.6	1.5	84	93	57	'MOLECULE: DNA (5''-D(*GP*AP*CP*AP*GP*GP*AP*TP*GP*TP*G)-3''); '	NP_001964.2	NP_001964	60	73.85	65	26	0	21	85	21	85	1e-19	90.5	IPR000418; IPR011991	Y	ELK4	9606 [Organism: human] [Scientific Name: Homo sapiens]	Y	26	1BC8-C	-	-	-	-	-	-	-	-	-
1BC7	C	P28324	gi|4139945|pdb|1BC7|C	60	73.85	65	26	0	21	85	21	85	3e-22	84.7	16.6	1.5	84	93	57	'MOLECULE: DNA (5''-D(*GP*AP*CP*AP*GP*GP*AP*TP*GP*TP*G)-3''); '	NP_001964.2	NP_001964	60	73.85	65	26	0	21	85	21	85	1e-19	90.5	IPR000418; IPR011991	Y	ELK4	9606 [Organism: human] [Scientific Name: Homo sapiens]	Y	26	1BC8-C	-	-	-	-	-	-	-	-	-
1BC7	C	P28324	gi|4139945|pdb|1BC7|C	60	73.85	65	26	0	21	85	21	85	3e-22	84.7	16.6	1.5	84	93	57	'MOLECULE: DNA (5''-D(*GP*AP*CP*AP*GP*GP*AP*TP*GP*TP*G)-3''); '	NP_001964.2	NP_001964	60	73.85	65	26	0	21	85	21	85	1e-19	90.5	IPR000418; IPR011991	Y	ELK4	9606 [Organism: human] [Scientific Name: Homo sapiens]	Y	26	1BC8-C	-	-	-	-	-	-	-	-	-
1BC7	C	P28324	gi|4139945|pdb|1BC7|C	60	73.85	65	26	0	21	85	21	85	3e-22	84.7	16.6	1.5	84	93	57	'MOLECULE: DNA (5''-D(*GP*AP*CP*AP*GP*GP*AP*TP*GP*TP*G)-3''); '	NP_001964.2	NP_001964	60	73.85	65	26	0	21	85	21	85	1e-19	90.5	IPR000418; IPR011991	Y	ELK4	9606 [Organism: human] [Scientific Name: Homo sapiens]	Y	26	1BC8-C	-	-	-	-	-	-	-	-	-
1BC7	C	P28324	gi|4139945|pdb|1BC7|C	60	73.85	65	26	0	21	85	21	85	3e-22	84.7	16.6	1.5	84	93	57	'MOLECULE: DNA (5''-D(*GP*AP*CP*AP*GP*GP*AP*TP*GP*TP*G)-3''); '	NP_001964.2	NP_001964	60	73.85	65	26	0	21	85	21	85	1e-19	90.5	IPR000418; IPR011991	Y	ELK4	9606 [Organism: human] [Scientific Name: Homo sapiens]	Y	26	1BC8-C	-	-	-	-	-	-	-	-	-
1BC7	C	P28324	gi|4139945|pdb|1BC7|C	60	73.85	65	26	0	21	85	21	85	3e-22	84.7	16.6	1.5	84	93	57	'MOLECULE: DNA (5''-D(*GP*AP*CP*AP*GP*GP*AP*TP*GP*TP*G)-3''); '	NP_001964.2	NP_001964	60	73.85	65	26	0	21	85	21	85	1e-19	90.5	IPR000418; IPR011991	Y	ELK4	9606 [Organism: human] [Scientific Name: Homo sapiens]	Y	26	1BC8-C	-	-	-	-	-	-	-	-	-
1BC7	C	P28324	gi|4139945|pdb|1BC7|C	60	73.85	65	26	0	21	85	21	85	3e-22	84.7	16.6	1.5	84	93	57	'MOLECULE: DNA (5''-D(*GP*AP*CP*AP*GP*GP*AP*TP*GP*TP*G)-3''); '	NP_001964.2	NP_001964	60	73.85	65	26	0	21	85	21	85	1e-19	90.5	IPR000418; IPR011991	Y	ELK4	9606 [Organism: human] [Scientific Name: Homo sapiens]	Y	26	1BC8-C	-	-	-	-	-	-	-	-	-
1BC7	C	P28324	gi|4139945|pdb|1BC7|C	60	73.85	65	26	0	21	85	21	85	3e-22	84.7	16.6	1.5	84	93	57	'MOLECULE: DNA (5''-D(*GP*AP*CP*AP*GP*GP*AP*TP*GP*TP*G)-3''); '	NP_001964.2	NP_001964	60	73.85	65	26	0	21	85	21	85	1e-19	90.5	IPR000418; IPR011991	Y	ELK4	9606 [Organism: human] [Scientific Name: Homo sapiens]	Y	26	1BC8-C	-	-	-	-	-	-	-	-	-
1BC7	C	P28324	gi|4139945|pdb|1BC7|C	60	73.85	65	26	0	21	85	21	85	3e-22	84.7	16.6	1.5	84	93	57	'MOLECULE: DNA (5''-D(*GP*AP*CP*AP*GP*GP*AP*TP*GP*TP*G)-3''); '	NP_001964.2	NP_001964	60	73.85	65	26	0	21	85	21	85	1e-19	90.5	IPR000418; IPR011991	Y	ELK4	9606 [Organism: human] [Scientific Name: Homo sapiens]	Y	26	1BC8-C	-	-	-	-	-	-	-	-	-
1BC7	C	P28324	gi|4139945|pdb|1BC7|C	60	73.85	65	26	0	21	85	21	85	3e-22	84.7	16.6	1.5	84	93	57	'MOLECULE: DNA (5''-D(*GP*AP*CP*AP*GP*GP*AP*TP*GP*TP*G)-3''); '	NP_001964.2	NP_001964	60	73.85	65	26	0	21	85	21	85	1e-19	90.5	IPR000418; IPR011991	Y	ELK4	9606 [Organism: human] [Scientific Name: Homo sapiens]	Y	26	1BC8-C	-	-	-	-	-	-	-	-	-
1BC7	C	P28324	gi|4139945|pdb|1BC7|C	60	73.85	65	26	0	21	85	21	85	3e-22	84.7	16.6	1.5	84	93	57	'MOLECULE: DNA (5''-D(*GP*AP*CP*AP*GP*GP*AP*TP*GP*TP*G)-3''); '	NP_001964.2	NP_001964	60	73.85	65	26	0	21	85	21	85	1e-19	90.5	IPR000418; IPR011991	Y	ELK4	9606 [Organism: human] [Scientific Name: Homo sapiens]	Y	26	1BC8-C	-	-	-	-	-	-	-	-	-
1BC7	C	P28324	gi|4139945|pdb|1BC7|C	60	73.85	65	26	0	21	85	21	85	3e-22	84.7	16.6	1.5	84	93	57	'MOLECULE: DNA (5''-D(*GP*AP*CP*AP*GP*GP*AP*TP*GP*TP*G)-3''); '	NP_001964.2	NP_001964	60	73.85	65	26	0	21	85	21	85	1e-19	90.5	IPR000418; IPR011991	Y	ELK4	9606 [Organism: human] [Scientific Name: Homo sapiens]	Y	26	1BC8-C	-	-	-	-	-	-	-	-	-
1BC7	C	P28324	gi|4139945|pdb|1BC7|C	60	73.85	65	26	0	21	85	21	85	3e-22	84.7	16.6	1.5	84	93	57	'MOLECULE: DNA (5''-D(*GP*AP*CP*AP*GP*GP*AP*TP*GP*TP*G)-3''); '	NP_001964.2	NP_001964	60	73.85	65	26	0	21	85	21	85	1e-19	90.5	IPR000418; IPR011991	Y	ELK4	9606 [Organism: human] [Scientific Name: Homo sapiens]	Y	26	1BC8-C	-	-	-	-	-	-	-	-	-
1BC7	C	P28324	gi|4139945|pdb|1BC7|C	60	73.85	65	26	0	21	85	21	85	3e-22	84.7	16.6	1.5	84	93	57	'MOLECULE: DNA (5''-D(*GP*AP*CP*AP*GP*GP*AP*TP*GP*TP*G)-3''); '	NP_001964.2	NP_001964	60	73.85	65	26	0	21	85	21	85	1e-19	90.5	IPR000418; IPR011991	Y	ELK4	9606 [Organism: human] [Scientific Name: Homo sapiens]	Y	26	1BC8-C	-	-	-	-	-	-	-	-	-
1BC7	C	P28324	gi|4139945|pdb|1BC7|C	60	73.85	65	26	0	21	85	21	85	3e-22	84.7	16.6	1.5	84	93	57	'MOLECULE: DNA (5''-D(*GP*AP*CP*AP*GP*GP*AP*TP*GP*TP*G)-3''); '	NP_001964.2	NP_001964	60	73.85	65	26	0	21	85	21	85	1e-19	90.5	IPR000418; IPR011991	Y	ELK4	9606 [Organism: human] [Scientific Name: Homo sapiens]	Y	26	1BC8-C	-	-	-	-	-	-	-	-	-
1BC7	C	P28324	gi|4139945|pdb|1BC7|C	60	73.85	65	26	0	21	85	21	85	3e-22	84.7	16.6	1.5	84	93	57	'MOLECULE: DNA (5''-D(*GP*AP*CP*AP*GP*GP*AP*TP*GP*TP*G)-3''); '	NP_001964.2	NP_001964	60	73.85	65	26	0	21	85	21	85	1e-19	90.5	IPR000418; IPR011991	Y	ELK4	9606 [Organism: human] [Scientific Name: Homo sapiens]	Y	26	1BC8-C	-	-	-	-	-	-	-	-	-
1BC7	C	P28324	gi|4139945|pdb|1BC7|C	60	73.85	65	26	0	21	85	21	85	3e-22	84.7	16.6	1.5	84	93	57	'MOLECULE: DNA (5''-D(*GP*AP*CP*AP*GP*GP*AP*TP*GP*TP*G)-3''); '	NP_001964.2	NP_001964	60	73.85	65	26	0	21	85	21	85	1e-19	90.5	IPR000418; IPR011991	Y	ELK4	9606 [Organism: human] [Scientific Name: Homo sapiens]	Y	26	1BC8-C	-	-	-	-	-	-	-	-	-
1BC7	C	P28324	gi|4139945|pdb|1BC7|C	60	73.85	65	26	0	21	85	21	85	3e-22	84.7	16.6	1.5	84	93	57	'MOLECULE: DNA (5''-D(*GP*AP*CP*AP*GP*GP*AP*TP*GP*TP*G)-3''); '	NP_001964.2	NP_001964	60	73.85	65	26	0	21	85	21	85	1e-19	90.5	IPR000418; IPR011991	Y	ELK4	9606 [Organism: human] [Scientific Name: Homo sapiens]	Y	26	1BC8-C	-	-	-	-	-	-	-	-	-
1BC7	C	P28324	gi|4139945|pdb|1BC7|C	60	73.85	65	26	0	21	85	21	85	3e-22	84.7	16.6	1.5	84	93	57	'MOLECULE: DNA (5''-D(*GP*AP*CP*AP*GP*GP*AP*TP*GP*TP*G)-3''); '	NP_001964.2	NP_001964	60	73.85	65	26	0	21	85	21	85	1e-19	90.5	IPR000418; IPR011991	Y	ELK4	9606 [Organism: human] [Scientific Name: Homo sapiens]	Y	26	1BC8-C	-	-	-	-	-	-	-	-	-
1BC7	C	P28324	gi|4139945|pdb|1BC7|C	60	73.85	65	26	0	21	85	21	85	3e-22	84.7	16.6	1.5	84	93	57	'MOLECULE: DNA (5''-D(*GP*AP*CP*AP*GP*GP*AP*TP*GP*TP*G)-3''); '	NP_068567.1	NP_068567	60	73.85	65	26	0	21	85	21	85	9e-20	90.5	IPR000418; IPR011991	Y	ELK4	9606 [Organism: human] [Scientific Name: Homo sapiens]	Y	26	1BC8-C	-	-	-	-	-	-	-	-	-
1BC7	C	P28324	gi|4139945|pdb|1BC7|C	60	73.85	65	26	0	21	85	21	85	3e-22	84.7	16.6	1.5	84	93	57	'MOLECULE: DNA (5''-D(*GP*AP*CP*AP*GP*GP*AP*TP*GP*TP*G)-3''); '	NP_068567.1	NP_068567	60	73.85	65	26	0	21	85	21	85	9e-20	90.5	IPR000418; IPR011991	Y	ELK4	9606 [Organism: human] [Scientific Name: Homo sapiens]	Y	26	1BC8-C	-	-	-	-	-	-	-	-	-
1BC7	C	P28324	gi|4139945|pdb|1BC7|C	60	73.85	65	26	0	21	85	21	85	3e-22	84.7	16.6	1.5	84	93	57	'MOLECULE: DNA (5''-D(*GP*AP*CP*AP*GP*GP*AP*TP*GP*TP*G)-3''); '	NP_068567.1	NP_068567	60	73.85	65	26	0	21	85	21	85	9e-20	90.5	IPR000418; IPR011991	Y	ELK4	9606 [Organism: human] [Scientific Name: Homo sapiens]	Y	26	1BC8-C	-	-	-	-	-	-	-	-	-
1BC7	C	P28324	gi|4139945|pdb|1BC7|C	60	73.85	65	26	0	21	85	21	85	3e-22	84.7	16.6	1.5	84	93	57	'MOLECULE: DNA (5''-D(*GP*AP*CP*AP*GP*GP*AP*TP*GP*TP*G)-3''); '	NP_068567.1	NP_068567	60	73.85	65	26	0	21	85	21	85	9e-20	90.5	IPR000418; IPR011991	Y	ELK4	9606 [Organism: human] [Scientific Name: Homo sapiens]	Y	26	1BC8-C	-	-	-	-	-	-	-	-	-
1BC7	C	P28324	gi|4139945|pdb|1BC7|C	60	73.85	65	26	0	21	85	21	85	3e-22	84.7	16.6	1.5	84	93	57	'MOLECULE: DNA (5''-D(*GP*AP*CP*AP*GP*GP*AP*TP*GP*TP*G)-3''); '	NP_068567.1	NP_068567	60	73.85	65	26	0	21	85	21	85	9e-20	90.5	IPR000418; IPR011991	Y	ELK4	9606 [Organism: human] [Scientific Name: Homo sapiens]	Y	26	1BC8-C	-	-	-	-	-	-	-	-	-
1BC7	C	P28324	gi|4139945|pdb|1BC7|C	60	73.85	65	26	0	21	85	21	85	3e-22	84.7	16.6	1.5	84	93	57	'MOLECULE: DNA (5''-D(*GP*AP*CP*AP*GP*GP*AP*TP*GP*TP*G)-3''); '	NP_068567.1	NP_068567	60	73.85	65	26	0	21	85	21	85	9e-20	90.5	IPR000418; IPR011991	Y	ELK4	9606 [Organism: human] [Scientific Name: Homo sapiens]	Y	26	1BC8-C	-	-	-	-	-	-	-	-	-
1BC7	C	P28324	gi|4139945|pdb|1BC7|C	60	73.85	65	26	0	21	85	21	85	3e-22	84.7	16.6	1.5	84	93	57	'MOLECULE: DNA (5''-D(*GP*AP*CP*AP*GP*GP*AP*TP*GP*TP*G)-3''); '	NP_068567.1	NP_068567	60	73.85	65	26	0	21	85	21	85	9e-20	90.5	IPR000418; IPR011991	Y	ELK4	9606 [Organism: human] [Scientific Name: Homo sapiens]	Y	26	1BC8-C	-	-	-	-	-	-	-	-	-
1BC7	C	P28324	gi|4139945|pdb|1BC7|C	60	73.85	65	26	0	21	85	21	85	3e-22	84.7	16.6	1.5	84	93	57	'MOLECULE: DNA (5''-D(*GP*AP*CP*AP*GP*GP*AP*TP*GP*TP*G)-3''); '	NP_068567.1	NP_068567	60	73.85	65	26	0	21	85	21	85	9e-20	90.5	IPR000418; IPR011991	Y	ELK4	9606 [Organism: human] [Scientific Name: Homo sapiens]	Y	26	1BC8-C	-	-	-	-	-	-	-	-	-
1BC7	C	P28324	gi|4139945|pdb|1BC7|C	60	73.85	65	26	0	21	85	21	85	3e-22	84.7	16.6	1.5	84	93	57	'MOLECULE: DNA (5''-D(*GP*AP*CP*AP*GP*GP*AP*TP*GP*TP*G)-3''); '	NP_068567.1	NP_068567	60	73.85	65	26	0	21	85	21	85	9e-20	90.5	IPR000418; IPR011991	Y	ELK4	9606 [Organism: human] [Scientific Name: Homo sapiens]	Y	26	1BC8-C	-	-	-	-	-	-	-	-	-
1BC7	C	P28324	gi|4139945|pdb|1BC7|C	60	73.85	65	26	0	21	85	21	85	3e-22	84.7	16.6	1.5	84	93	57	'MOLECULE: DNA (5''-D(*GP*AP*CP*AP*GP*GP*AP*TP*GP*TP*G)-3''); '	NP_068567.1	NP_068567	60	73.85	65	26	0	21	85	21	85	9e-20	90.5	IPR000418; IPR011991	Y	ELK4	9606 [Organism: human] [Scientific Name: Homo sapiens]	Y	26	1BC8-C	-	-	-	-	-	-	-	-	-
1BC7	C	P28324	gi|4139945|pdb|1BC7|C	60	73.85	65	26	0	21	85	21	85	3e-22	84.7	16.6	1.5	84	93	57	'MOLECULE: DNA (5''-D(*GP*AP*CP*AP*GP*GP*AP*TP*GP*TP*G)-3''); '	NP_068567.1	NP_068567	60	73.85	65	26	0	21	85	21	85	9e-20	90.5	IPR000418; IPR011991	Y	ELK4	9606 [Organism: human] [Scientific Name: Homo sapiens]	Y	26	1BC8-C	-	-	-	-	-	-	-	-	-
1BC7	C	P28324	gi|4139945|pdb|1BC7|C	60	73.85	65	26	0	21	85	21	85	3e-22	84.7	16.6	1.5	84	93	57	'MOLECULE: DNA (5''-D(*GP*AP*CP*AP*GP*GP*AP*TP*GP*TP*G)-3''); '	NP_068567.1	NP_068567	60	73.85	65	26	0	21	85	21	85	9e-20	90.5	IPR000418; IPR011991	Y	ELK4	9606 [Organism: human] [Scientific Name: Homo sapiens]	Y	26	1BC8-C	-	-	-	-	-	-	-	-	-
1BC7	C	P28324	gi|4139945|pdb|1BC7|C	60	73.85	65	26	0	21	85	21	85	3e-22	84.7	16.6	1.5	84	93	57	'MOLECULE: DNA (5''-D(*GP*AP*CP*AP*GP*GP*AP*TP*GP*TP*G)-3''); '	NP_068567.1	NP_068567	60	73.85	65	26	0	21	85	21	85	9e-20	90.5	IPR000418; IPR011991	Y	ELK4	9606 [Organism: human] [Scientific Name: Homo sapiens]	Y	26	1BC8-C	-	-	-	-	-	-	-	-	-
1BC7	C	P28324	gi|4139945|pdb|1BC7|C	60	73.85	65	26	0	21	85	21	85	3e-22	84.7	16.6	1.5	84	93	57	'MOLECULE: DNA (5''-D(*GP*AP*CP*AP*GP*GP*AP*TP*GP*TP*G)-3''); '	NP_068567.1	NP_068567	60	73.85	65	26	0	21	85	21	85	9e-20	90.5	IPR000418; IPR011991	Y	ELK4	9606 [Organism: human] [Scientific Name: Homo sapiens]	Y	26	1BC8-C	-	-	-	-	-	-	-	-	-
1BC7	C	P28324	gi|4139945|pdb|1BC7|C	60	73.85	65	26	0	21	85	21	85	3e-22	84.7	16.6	1.5	84	93	57	'MOLECULE: DNA (5''-D(*GP*AP*CP*AP*GP*GP*AP*TP*GP*TP*G)-3''); '	NP_068567.1	NP_068567	60	73.85	65	26	0	21	85	21	85	9e-20	90.5	IPR000418; IPR011991	Y	ELK4	9606 [Organism: human] [Scientific Name: Homo sapiens]	Y	26	1BC8-C	-	-	-	-	-	-	-	-	-
1BC7	C	P28324	gi|4139945|pdb|1BC7|C	60	73.85	65	26	0	21	85	21	85	3e-22	84.7	16.6	1.5	84	93	57	'MOLECULE: DNA (5''-D(*GP*AP*CP*AP*GP*GP*AP*TP*GP*TP*G)-3''); '	NP_068567.1	NP_068567	60	73.85	65	26	0	21	85	21	85	9e-20	90.5	IPR000418; IPR011991	Y	ELK4	9606 [Organism: human] [Scientific Name: Homo sapiens]	Y	26	1BC8-C	-	-	-	-	-	-	-	-	-
1BC7	C	P28324	gi|4139945|pdb|1BC7|C	60	73.85	65	26	0	21	85	21	85	3e-22	84.7	16.6	1.5	84	93	57	'MOLECULE: DNA (5''-D(*GP*AP*CP*AP*GP*GP*AP*TP*GP*TP*G)-3''); '	NP_068567.1	NP_068567	60	73.85	65	26	0	21	85	21	85	9e-20	90.5	IPR000418; IPR011991	Y	ELK4	9606 [Organism: human] [Scientific Name: Homo sapiens]	Y	26	1BC8-C	-	-	-	-	-	-	-	-	-
1BC7	C	P28324	gi|4139945|pdb|1BC7|C	60	73.85	65	26	0	21	85	21	85	3e-22	84.7	16.6	1.5	84	93	57	'MOLECULE: DNA (5''-D(*GP*AP*CP*AP*GP*GP*AP*TP*GP*TP*G)-3''); '	NP_068567.1	NP_068567	60	73.85	65	26	0	21	85	21	85	9e-20	90.5	IPR000418; IPR011991	Y	ELK4	9606 [Organism: human] [Scientific Name: Homo sapiens]	Y	26	1BC8-C	-	-	-	-	-	-	-	-	-
1BC7	C	P28324	gi|4139945|pdb|1BC7|C	60	73.85	65	26	0	21	85	21	85	3e-22	84.7	16.6	1.5	84	93	57	'MOLECULE: DNA (5''-D(*GP*AP*CP*AP*GP*GP*AP*TP*GP*TP*G)-3''); '	NP_068567.1	NP_068567	60	73.85	65	26	0	21	85	21	85	9e-20	90.5	IPR000418; IPR011991	Y	ELK4	9606 [Organism: human] [Scientific Name: Homo sapiens]	Y	26	1BC8-C	-	-	-	-	-	-	-	-	-
1BC7	C	P28324	gi|4139945|pdb|1BC7|C	60	73.85	65	26	0	21	85	21	85	3e-22	84.7	16.6	1.5	84	93	57	'MOLECULE: DNA (5''-D(*GP*AP*CP*AP*GP*GP*AP*TP*GP*TP*G)-3''); '	NP_068567.1	NP_068567	60	73.85	65	26	0	21	85	21	85	9e-20	90.5	IPR000418; IPR011991	Y	ELK4	9606 [Organism: human] [Scientific Name: Homo sapiens]	Y	26	1BC8-C	-	-	-	-	-	-	-	-	-
1BC7	C	P28324	gi|4139945|pdb|1BC7|C	60	73.85	65	26	0	21	85	21	85	3e-22	84.7	16.6	1.5	84	93	57	'MOLECULE: DNA (5''-D(*GP*AP*CP*AP*GP*GP*AP*TP*GP*TP*G)-3''); '	NP_068567.1	NP_068567	60	73.85	65	26	0	21	85	21	85	9e-20	90.5	IPR000418; IPR011991	Y	ELK4	9606 [Organism: human] [Scientific Name: Homo sapiens]	Y	26	1BC8-C	-	-	-	-	-	-	-	-	-
1BC7	C	P28324	gi|4139945|pdb|1BC7|C	60	73.85	65	26	0	21	85	21	85	3e-22	84.7	16.6	1.5	84	93	57	'MOLECULE: DNA (5''-D(*GP*AP*CP*AP*GP*GP*AP*TP*GP*TP*G)-3''); '	NP_068567.1	NP_068567	60	73.85	65	26	0	21	85	21	85	9e-20	90.5	IPR000418; IPR011991	Y	ELK4	9606 [Organism: human] [Scientific Name: Homo sapiens]	Y	26	1BC8-C	-	-	-	-	-	-	-	-	-
1BC7	C	P28324	gi|4139945|pdb|1BC7|C	60	73.85	65	26	0	21	85	21	85	3e-22	84.7	16.6	1.5	84	93	57	'MOLECULE: DNA (5''-D(*GP*AP*CP*AP*GP*GP*AP*TP*GP*TP*G)-3''); '	NP_068567.1	NP_068567	60	73.85	65	26	0	21	85	21	85	9e-20	90.5	IPR000418; IPR011991	Y	ELK4	9606 [Organism: human] [Scientific Name: Homo sapiens]	Y	26	1BC8-C	-	-	-	-	-	-	-	-	-
1BC7	C	P28324	gi|4139945|pdb|1BC7|C	60	73.85	65	26	0	21	85	21	85	3e-22	84.7	16.6	1.5	84	93	57	'MOLECULE: DNA (5''-D(*GP*AP*CP*AP*GP*GP*AP*TP*GP*TP*G)-3''); '	NP_068567.1	NP_068567	60	73.85	65	26	0	21	85	21	85	9e-20	90.5	IPR000418; IPR011991	Y	ELK4	9606 [Organism: human] [Scientific Name: Homo sapiens]	Y	26	1BC8-C	-	-	-	-	-	-	-	-	-
1BC7	C	P28324	gi|4139945|pdb|1BC7|C	60	73.85	65	26	0	21	85	21	85	3e-22	84.7	16.6	1.5	84	93	57	'MOLECULE: DNA (5''-D(*GP*AP*CP*AP*GP*GP*AP*TP*GP*TP*G)-3''); '	NP_068567.1	NP_068567	60	73.85	65	26	0	21	85	21	85	9e-20	90.5	IPR000418; IPR011991	Y	ELK4	9606 [Organism: human] [Scientific Name: Homo sapiens]	Y	26	1BC8-C	-	-	-	-	-	-	-	-	-
1BC7	C	P28324	gi|4139945|pdb|1BC7|C	60	73.85	65	26	0	21	85	21	85	3e-22	84.7	16.6	1.5	84	93	57	'MOLECULE: DNA (5''-D(*GP*AP*CP*AP*GP*GP*AP*TP*GP*TP*G)-3''); '	NP_068567.1	NP_068567	60	73.85	65	26	0	21	85	21	85	9e-20	90.5	IPR000418; IPR011991	Y	ELK4	9606 [Organism: human] [Scientific Name: Homo sapiens]	Y	26	1BC8-C	-	-	-	-	-	-	-	-	-
1BC7	C	P28324	gi|4139945|pdb|1BC7|C	60	73.85	65	26	0	21	85	21	85	3e-22	84.7	16.6	1.5	84	93	57	'MOLECULE: DNA (5''-D(*GP*AP*CP*AP*GP*GP*AP*TP*GP*TP*G)-3''); '	NP_068567.1	NP_068567	60	73.85	65	26	0	21	85	21	85	9e-20	90.5	IPR000418; IPR011991	Y	ELK4	9606 [Organism: human] [Scientific Name: Homo sapiens]	Y	26	1BC8-C	-	-	-	-	-	-	-	-	-
1BC7	C	P28324	gi|4139945|pdb|1BC7|C	60	73.85	65	26	0	21	85	21	85	3e-22	84.7	16.6	1.5	84	93	57	'MOLECULE: DNA (5''-D(*GP*AP*CP*AP*GP*GP*AP*TP*GP*TP*G)-3''); '	NP_068567.1	NP_068567	60	73.85	65	26	0	21	85	21	85	9e-20	90.5	IPR000418; IPR011991	Y	ELK4	9606 [Organism: human] [Scientific Name: Homo sapiens]	Y	26	1BC8-C	-	-	-	-	-	-	-	-	-
1BC7	C	P28324	gi|4139945|pdb|1BC7|C	60	73.85	65	26	0	21	85	21	85	3e-22	84.7	16.6	1.5	84	93	57	'MOLECULE: DNA (5''-D(*GP*AP*CP*AP*GP*GP*AP*TP*GP*TP*G)-3''); '	NP_068567.1	NP_068567	60	73.85	65	26	0	21	85	21	85	9e-20	90.5	IPR000418; IPR011991	Y	ELK4	9606 [Organism: human] [Scientific Name: Homo sapiens]	Y	26	1BC8-C	-	-	-	-	-	-	-	-	-
1BC7	C	P28324	gi|4139945|pdb|1BC7|C	60	73.85	65	26	0	21	85	21	85	3e-22	84.7	16.6	1.5	84	93	57	'MOLECULE: DNA (5''-D(*GP*AP*CP*AP*GP*GP*AP*TP*GP*TP*G)-3''); '	NP_068567.1	NP_068567	60	73.85	65	26	0	21	85	21	85	9e-20	90.5	IPR000418; IPR011991	Y	ELK4	9606 [Organism: human] [Scientific Name: Homo sapiens]	Y	26	1BC8-C	-	-	-	-	-	-	-	-	-
1BC7	C	P28324	gi|4139945|pdb|1BC7|C	60	73.85	65	26	0	21	85	21	85	3e-22	84.7	16.6	1.5	84	93	57	'MOLECULE: DNA (5''-D(*GP*AP*CP*AP*GP*GP*AP*TP*GP*TP*G)-3''); '	NP_068567.1	NP_068567	60	73.85	65	26	0	21	85	21	85	9e-20	90.5	IPR000418; IPR011991	Y	ELK4	9606 [Organism: human] [Scientific Name: Homo sapiens]	Y	26	1BC8-C	-	-	-	-	-	-	-	-	-
1BC7	C	P28324	gi|4139945|pdb|1BC7|C	60	73.85	65	26	0	21	85	21	85	3e-22	84.7	16.6	1.5	84	93	57	'MOLECULE: DNA (5''-D(*GP*AP*CP*AP*GP*GP*AP*TP*GP*TP*G)-3''); '	NP_068567.1	NP_068567	60	73.85	65	26	0	21	85	21	85	9e-20	90.5	IPR000418; IPR011991	Y	ELK4	9606 [Organism: human] [Scientific Name: Homo sapiens]	Y	26	1BC8-C	-	-	-	-	-	-	-	-	-
1BC7	C	P28324	gi|4139945|pdb|1BC7|C	60	73.85	65	26	0	21	85	21	85	3e-22	84.7	16.6	1.5	84	93	57	'MOLECULE: DNA (5''-D(*GP*AP*CP*AP*GP*GP*AP*TP*GP*TP*G)-3''); '	NP_068567.1	NP_068567	60	73.85	65	26	0	21	85	21	85	9e-20	90.5	IPR000418; IPR011991	Y	ELK4	9606 [Organism: human] [Scientific Name: Homo sapiens]	Y	26	1BC8-C	-	-	-	-	-	-	-	-	-
1BC7	C	P28324	gi|4139945|pdb|1BC7|C	60	73.85	65	26	0	21	85	21	85	3e-22	84.7	16.6	1.5	84	93	57	'MOLECULE: DNA (5''-D(*GP*AP*CP*AP*GP*GP*AP*TP*GP*TP*G)-3''); '	NP_068567.1	NP_068567	60	73.85	65	26	0	21	85	21	85	9e-20	90.5	IPR000418; IPR011991	Y	ELK4	9606 [Organism: human] [Scientific Name: Homo sapiens]	Y	26	1BC8-C	-	-	-	-	-	-	-	-	-
1BC7	C	P28324	gi|4139945|pdb|1BC7|C	60	73.85	65	26	0	21	85	21	85	3e-22	84.7	16.6	1.5	84	93	57	'MOLECULE: DNA (5''-D(*GP*AP*CP*AP*GP*GP*AP*TP*GP*TP*G)-3''); '	NP_068567.1	NP_068567	60	73.85	65	26	0	21	85	21	85	9e-20	90.5	IPR000418; IPR011991	Y	ELK4	9606 [Organism: human] [Scientific Name: Homo sapiens]	Y	26	1BC8-C	-	-	-	-	-	-	-	-	-
1BC7	C	P28324	gi|4139945|pdb|1BC7|C	60	73.85	65	26	0	21	85	21	85	3e-22	84.7	16.6	1.5	84	93	57	'MOLECULE: DNA (5''-D(*GP*AP*CP*AP*GP*GP*AP*TP*GP*TP*G)-3''); '	NP_068567.1	NP_068567	60	73.85	65	26	0	21	85	21	85	9e-20	90.5	IPR000418; IPR011991	Y	ELK4	9606 [Organism: human] [Scientific Name: Homo sapiens]	Y	26	1BC8-C	-	-	-	-	-	-	-	-	-
1BC7	C	P28324	gi|4139945|pdb|1BC7|C	60	73.85	65	26	0	21	85	21	85	3e-22	84.7	16.6	1.5	84	93	57	'MOLECULE: DNA (5''-D(*GP*AP*CP*AP*GP*GP*AP*TP*GP*TP*G)-3''); '	NP_068567.1	NP_068567	60	73.85	65	26	0	21	85	21	85	9e-20	90.5	IPR000418; IPR011991	Y	ELK4	9606 [Organism: human] [Scientific Name: Homo sapiens]	Y	26	1BC8-C	-	-	-	-	-	-	-	-	-
1BC7	C	P28324	gi|4139945|pdb|1BC7|C	60	73.85	65	26	0	21	85	21	85	3e-22	84.7	16.6	1.5	84	93	57	'MOLECULE: DNA (5''-D(*GP*AP*CP*AP*GP*GP*AP*TP*GP*TP*G)-3''); '	NP_068567.1	NP_068567	60	73.85	65	26	0	21	85	21	85	9e-20	90.5	IPR000418; IPR011991	Y	ELK4	9606 [Organism: human] [Scientific Name: Homo sapiens]	Y	26	1BC8-C	-	-	-	-	-	-	-	-	-
1BC7	C	P28324	gi|4139945|pdb|1BC7|C	60	73.85	65	26	0	21	85	21	85	3e-22	84.7	16.6	1.5	84	93	57	'MOLECULE: DNA (5''-D(*GP*AP*CP*AP*GP*GP*AP*TP*GP*TP*G)-3''); '	NP_068567.1	NP_068567	60	73.85	65	26	0	21	85	21	85	9e-20	90.5	IPR000418; IPR011991	Y	ELK4	9606 [Organism: human] [Scientific Name: Homo sapiens]	Y	26	1BC8-C	-	-	-	-	-	-	-	-	-
1BC7	C	P28324	gi|4139945|pdb|1BC7|C	60	73.85	65	26	0	21	85	21	85	3e-22	84.7	16.6	1.5	84	93	57	'MOLECULE: DNA (5''-D(*GP*AP*CP*AP*GP*GP*AP*TP*GP*TP*G)-3''); '	NP_068567.1	NP_068567	60	73.85	65	26	0	21	85	21	85	9e-20	90.5	IPR000418; IPR011991	Y	ELK4	9606 [Organism: human] [Scientific Name: Homo sapiens]	Y	26	1BC8-C	-	-	-	-	-	-	-	-	-
1BC7	C	P28324	gi|4139945|pdb|1BC7|C	60	73.85	65	26	0	21	85	21	85	3e-22	84.7	16.6	1.5	84	93	57	'MOLECULE: DNA (5''-D(*GP*AP*CP*AP*GP*GP*AP*TP*GP*TP*G)-3''); '	NP_068567.1	NP_068567	60	73.85	65	26	0	21	85	21	85	9e-20	90.5	IPR000418; IPR011991	Y	ELK4	9606 [Organism: human] [Scientific Name: Homo sapiens]	Y	26	1BC8-C	-	-	-	-	-	-	-	-	-
1BC7	C	P28324	gi|4139945|pdb|1BC7|C	60	73.85	65	26	0	21	85	21	85	3e-22	84.7	16.6	1.5	84	93	57	'MOLECULE: DNA (5''-D(*GP*AP*CP*AP*GP*GP*AP*TP*GP*TP*G)-3''); '	NP_068567.1	NP_068567	60	73.85	65	26	0	21	85	21	85	9e-20	90.5	IPR000418; IPR011991	Y	ELK4	9606 [Organism: human] [Scientific Name: Homo sapiens]	Y	26	1BC8-C	-	-	-	-	-	-	-	-	-
1BC7	C	P28324	gi|4139945|pdb|1BC7|C	60	73.85	65	26	0	21	85	21	85	3e-22	84.7	16.6	1.5	84	93	57	'MOLECULE: DNA (5''-D(*GP*AP*CP*AP*GP*GP*AP*TP*GP*TP*G)-3''); '	NP_068567.1	NP_068567	60	73.85	65	26	0	21	85	21	85	9e-20	90.5	IPR000418; IPR011991	Y	ELK4	9606 [Organism: human] [Scientific Name: Homo sapiens]	Y	26	1BC8-C	-	-	-	-	-	-	-	-	-
1BC7	C	P28324	gi|4139945|pdb|1BC7|C	60	73.85	65	26	0	21	85	21	85	3e-22	84.7	16.6	1.5	84	93	57	'MOLECULE: DNA (5''-D(*GP*AP*CP*AP*GP*GP*AP*TP*GP*TP*G)-3''); '	NP_068567.1	NP_068567	60	73.85	65	26	0	21	85	21	85	9e-20	90.5	IPR000418; IPR011991	Y	ELK4	9606 [Organism: human] [Scientific Name: Homo sapiens]	Y	26	1BC8-C	-	-	-	-	-	-	-	-	-
1BC7	C	P28324	gi|4139945|pdb|1BC7|C	60	73.85	65	26	0	21	85	21	85	3e-22	84.7	16.6	1.5	84	93	57	'MOLECULE: DNA (5''-D(*GP*AP*CP*AP*GP*GP*AP*TP*GP*TP*G)-3''); '	NP_068567.1	NP_068567	60	73.85	65	26	0	21	85	21	85	9e-20	90.5	IPR000418; IPR011991	Y	ELK4	9606 [Organism: human] [Scientific Name: Homo sapiens]	Y	26	1BC8-C	-	-	-	-	-	-	-	-	-
1BC7	C	P28324	gi|4139945|pdb|1BC7|C	60	73.85	65	26	0	21	85	21	85	3e-22	84.7	16.6	1.5	84	93	57	'MOLECULE: DNA (5''-D(*GP*AP*CP*AP*GP*GP*AP*TP*GP*TP*G)-3''); '	NP_068567.1	NP_068567	60	73.85	65	26	0	21	85	21	85	9e-20	90.5	IPR000418; IPR011991	Y	ELK4	9606 [Organism: human] [Scientific Name: Homo sapiens]	Y	26	1BC8-C	-	-	-	-	-	-	-	-	-
1BC7	C	P28324	gi|4139945|pdb|1BC7|C	60	73.85	65	26	0	21	85	21	85	3e-22	84.7	16.6	1.5	84	93	57	'MOLECULE: DNA (5''-D(*GP*AP*CP*AP*GP*GP*AP*TP*GP*TP*G)-3''); '	NP_068567.1	NP_068567	60	73.85	65	26	0	21	85	21	85	9e-20	90.5	IPR000418; IPR011991	Y	ELK4	9606 [Organism: human] [Scientific Name: Homo sapiens]	Y	26	1BC8-C	-	-	-	-	-	-	-	-	-
1BC7	C	P28324	gi|4139945|pdb|1BC7|C	60	73.85	65	26	0	21	85	21	85	3e-22	84.7	16.6	1.5	84	93	57	'MOLECULE: DNA (5''-D(*GP*AP*CP*AP*GP*GP*AP*TP*GP*TP*G)-3''); '	NP_068567.1	NP_068567	60	73.85	65	26	0	21	85	21	85	9e-20	90.5	IPR000418; IPR011991	Y	ELK4	9606 [Organism: human] [Scientific Name: Homo sapiens]	Y	26	1BC8-C	-	-	-	-	-	-	-	-	-
1BC7	C	P28324	gi|4139945|pdb|1BC7|C	60	73.85	65	26	0	21	85	21	85	3e-22	84.7	16.6	1.5	84	93	57	'MOLECULE: DNA (5''-D(*GP*AP*CP*AP*GP*GP*AP*TP*GP*TP*G)-3''); '	NP_068567.1	NP_068567	60	73.85	65	26	0	21	85	21	85	9e-20	90.5	IPR000418; IPR011991	Y	ELK4	9606 [Organism: human] [Scientific Name: Homo sapiens]	Y	26	1BC8-C	-	-	-	-	-	-	-	-	-
1HBX	G	P28324	gi|14719548|pdb|1HBX|G	61.9	74.6	63	24	0	23	85	24	86	2e-21	84.7	16	1.5	84	112	57	MOLECULE: SERUM RESPONSE FACTOR;	NP_001964.2	NP_001964	60	73.85	65	26	0	21	85	21	85	1e-19	90.5	IPR000418; IPR011991	Y	ELK4	9606 [Organism: human] [Scientific Name: Homo sapiens]	Y	26	1BC8-C	-	-	-	-	-	-	-	-	-
1HBX	G	P28324	gi|14719548|pdb|1HBX|G	61.9	74.6	63	24	0	23	85	24	86	2e-21	84.7	16	1.5	84	112	57	MOLECULE: SERUM RESPONSE FACTOR;	NP_001964.2	NP_001964	60	73.85	65	26	0	21	85	21	85	1e-19	90.5	IPR000418; IPR011991	Y	ELK4	9606 [Organism: human] [Scientific Name: Homo sapiens]	Y	26	1BC8-C	-	-	-	-	-	-	-	-	-
1HBX	G	P28324	gi|14719548|pdb|1HBX|G	61.9	74.6	63	24	0	23	85	24	86	2e-21	84.7	16	1.5	84	112	57	MOLECULE: SERUM RESPONSE FACTOR;	NP_001964.2	NP_001964	60	73.85	65	26	0	21	85	21	85	1e-19	90.5	IPR000418; IPR011991	Y	ELK4	9606 [Organism: human] [Scientific Name: Homo sapiens]	Y	26	1BC8-C	-	-	-	-	-	-	-	-	-
1HBX	G	P28324	gi|14719548|pdb|1HBX|G	61.9	74.6	63	24	0	23	85	24	86	2e-21	84.7	16	1.5	84	112	57	MOLECULE: SERUM RESPONSE FACTOR;	NP_001964.2	NP_001964	60	73.85	65	26	0	21	85	21	85	1e-19	90.5	IPR000418; IPR011991	Y	ELK4	9606 [Organism: human] [Scientific Name: Homo sapiens]	Y	26	1BC8-C	-	-	-	-	-	-	-	-	-
1HBX	G	P28324	gi|14719548|pdb|1HBX|G	61.9	74.6	63	24	0	23	85	24	86	2e-21	84.7	16	1.5	84	112	57	MOLECULE: SERUM RESPONSE FACTOR;	NP_001964.2	NP_001964	60	73.85	65	26	0	21	85	21	85	1e-19	90.5	IPR000418; IPR011991	Y	ELK4	9606 [Organism: human] [Scientific Name: Homo sapiens]	Y	26	1BC8-C	-	-	-	-	-	-	-	-	-
1HBX	G	P28324	gi|14719548|pdb|1HBX|G	61.9	74.6	63	24	0	23	85	24	86	2e-21	84.7	16	1.5	84	112	57	MOLECULE: SERUM RESPONSE FACTOR;	NP_001964.2	NP_001964	60	73.85	65	26	0	21	85	21	85	1e-19	90.5	IPR000418; IPR011991	Y	ELK4	9606 [Organism: human] [Scientific Name: Homo sapiens]	Y	26	1BC8-C	-	-	-	-	-	-	-	-	-
1HBX	G	P28324	gi|14719548|pdb|1HBX|G	61.9	74.6	63	24	0	23	85	24	86	2e-21	84.7	16	1.5	84	112	57	MOLECULE: SERUM RESPONSE FACTOR;	NP_001964.2	NP_001964	60	73.85	65	26	0	21	85	21	85	1e-19	90.5	IPR000418; IPR011991	Y	ELK4	9606 [Organism: human] [Scientific Name: Homo sapiens]	Y	26	1BC8-C	-	-	-	-	-	-	-	-	-
1HBX	G	P28324	gi|14719548|pdb|1HBX|G	61.9	74.6	63	24	0	23	85	24	86	2e-21	84.7	16	1.5	84	112	57	MOLECULE: SERUM RESPONSE FACTOR;	NP_001964.2	NP_001964	60	73.85	65	26	0	21	85	21	85	1e-19	90.5	IPR000418; IPR011991	Y	ELK4	9606 [Organism: human] [Scientific Name: Homo sapiens]	Y	26	1BC8-C	-	-	-	-	-	-	-	-	-
1HBX	G	P28324	gi|14719548|pdb|1HBX|G	61.9	74.6	63	24	0	23	85	24	86	2e-21	84.7	16	1.5	84	112	57	MOLECULE: SERUM RESPONSE FACTOR;	NP_001964.2	NP_001964	60	73.85	65	26	0	21	85	21	85	1e-19	90.5	IPR000418; IPR011991	Y	ELK4	9606 [Organism: human] [Scientific Name: Homo sapiens]	Y	26	1BC8-C	-	-	-	-	-	-	-	-	-
1HBX	G	P28324	gi|14719548|pdb|1HBX|G	61.9	74.6	63	24	0	23	85	24	86	2e-21	84.7	16	1.5	84	112	57	MOLECULE: SERUM RESPONSE FACTOR;	NP_001964.2	NP_001964	60	73.85	65	26	0	21	85	21	85	1e-19	90.5	IPR000418; IPR011991	Y	ELK4	9606 [Organism: human] [Scientific Name: Homo sapiens]	Y	26	1BC8-C	-	-	-	-	-	-	-	-	-
1HBX	G	P28324	gi|14719548|pdb|1HBX|G	61.9	74.6	63	24	0	23	85	24	86	2e-21	84.7	16	1.5	84	112	57	MOLECULE: SERUM RESPONSE FACTOR;	NP_001964.2	NP_001964	60	73.85	65	26	0	21	85	21	85	1e-19	90.5	IPR000418; IPR011991	Y	ELK4	9606 [Organism: human] [Scientific Name: Homo sapiens]	Y	26	1BC8-C	-	-	-	-	-	-	-	-	-
1HBX	G	P28324	gi|14719548|pdb|1HBX|G	61.9	74.6	63	24	0	23	85	24	86	2e-21	84.7	16	1.5	84	112	57	MOLECULE: SERUM RESPONSE FACTOR;	NP_001964.2	NP_001964	60	73.85	65	26	0	21	85	21	85	1e-19	90.5	IPR000418; IPR011991	Y	ELK4	9606 [Organism: human] [Scientific Name: Homo sapiens]	Y	26	1BC8-C	-	-	-	-	-	-	-	-	-
1HBX	G	P28324	gi|14719548|pdb|1HBX|G	61.9	74.6	63	24	0	23	85	24	86	2e-21	84.7	16	1.5	84	112	57	MOLECULE: SERUM RESPONSE FACTOR;	NP_001964.2	NP_001964	60	73.85	65	26	0	21	85	21	85	1e-19	90.5	IPR000418; IPR011991	Y	ELK4	9606 [Organism: human] [Scientific Name: Homo sapiens]	Y	26	1BC8-C	-	-	-	-	-	-	-	-	-
1HBX	G	P28324	gi|14719548|pdb|1HBX|G	61.9	74.6	63	24	0	23	85	24	86	2e-21	84.7	16	1.5	84	112	57	MOLECULE: SERUM RESPONSE FACTOR;	NP_001964.2	NP_001964	60	73.85	65	26	0	21	85	21	85	1e-19	90.5	IPR000418; IPR011991	Y	ELK4	9606 [Organism: human] [Scientific Name: Homo sapiens]	Y	26	1BC8-C	-	-	-	-	-	-	-	-	-
1HBX	G	P28324	gi|14719548|pdb|1HBX|G	61.9	74.6	63	24	0	23	85	24	86	2e-21	84.7	16	1.5	84	112	57	MOLECULE: SERUM RESPONSE FACTOR;	NP_001964.2	NP_001964	60	73.85	65	26	0	21	85	21	85	1e-19	90.5	IPR000418; IPR011991	Y	ELK4	9606 [Organism: human] [Scientific Name: Homo sapiens]	Y	26	1BC8-C	-	-	-	-	-	-	-	-	-
1HBX	G	P28324	gi|14719548|pdb|1HBX|G	61.9	74.6	63	24	0	23	85	24	86	2e-21	84.7	16	1.5	84	112	57	MOLECULE: SERUM RESPONSE FACTOR;	NP_001964.2	NP_001964	60	73.85	65	26	0	21	85	21	85	1e-19	90.5	IPR000418; IPR011991	Y	ELK4	9606 [Organism: human] [Scientific Name: Homo sapiens]	Y	26	1BC8-C	-	-	-	-	-	-	-	-	-
1HBX	G	P28324	gi|14719548|pdb|1HBX|G	61.9	74.6	63	24	0	23	85	24	86	2e-21	84.7	16	1.5	84	112	57	MOLECULE: SERUM RESPONSE FACTOR;	NP_001964.2	NP_001964	60	73.85	65	26	0	21	85	21	85	1e-19	90.5	IPR000418; IPR011991	Y	ELK4	9606 [Organism: human] [Scientific Name: Homo sapiens]	Y	26	1BC8-C	-	-	-	-	-	-	-	-	-
1HBX	G	P28324	gi|14719548|pdb|1HBX|G	61.9	74.6	63	24	0	23	85	24	86	2e-21	84.7	16	1.5	84	112	57	MOLECULE: SERUM RESPONSE FACTOR;	NP_001964.2	NP_001964	60	73.85	65	26	0	21	85	21	85	1e-19	90.5	IPR000418; IPR011991	Y	ELK4	9606 [Organism: human] [Scientific Name: Homo sapiens]	Y	26	1BC8-C	-	-	-	-	-	-	-	-	-
1HBX	G	P28324	gi|14719548|pdb|1HBX|G	61.9	74.6	63	24	0	23	85	24	86	2e-21	84.7	16	1.5	84	112	57	MOLECULE: SERUM RESPONSE FACTOR;	NP_001964.2	NP_001964	60	73.85	65	26	0	21	85	21	85	1e-19	90.5	IPR000418; IPR011991	Y	ELK4	9606 [Organism: human] [Scientific Name: Homo sapiens]	Y	26	1BC8-C	-	-	-	-	-	-	-	-	-
1HBX	G	P28324	gi|14719548|pdb|1HBX|G	61.9	74.6	63	24	0	23	85	24	86	2e-21	84.7	16	1.5	84	112	57	MOLECULE: SERUM RESPONSE FACTOR;	NP_001964.2	NP_001964	60	73.85	65	26	0	21	85	21	85	1e-19	90.5	IPR000418; IPR011991	Y	ELK4	9606 [Organism: human] [Scientific Name: Homo sapiens]	Y	26	1BC8-C	-	-	-	-	-	-	-	-	-
1HBX	G	P28324	gi|14719548|pdb|1HBX|G	61.9	74.6	63	24	0	23	85	24	86	2e-21	84.7	16	1.5	84	112	57	MOLECULE: SERUM RESPONSE FACTOR;	NP_001964.2	NP_001964	60	73.85	65	26	0	21	85	21	85	1e-19	90.5	IPR000418; IPR011991	Y	ELK4	9606 [Organism: human] [Scientific Name: Homo sapiens]	Y	26	1BC8-C	-	-	-	-	-	-	-	-	-
1HBX	G	P28324	gi|14719548|pdb|1HBX|G	61.9	74.6	63	24	0	23	85	24	86	2e-21	84.7	16	1.5	84	112	57	MOLECULE: SERUM RESPONSE FACTOR;	NP_001964.2	NP_001964	60	73.85	65	26	0	21	85	21	85	1e-19	90.5	IPR000418; IPR011991	Y	ELK4	9606 [Organism: human] [Scientific Name: Homo sapiens]	Y	26	1BC8-C	-	-	-	-	-	-	-	-	-
1HBX	G	P28324	gi|14719548|pdb|1HBX|G	61.9	74.6	63	24	0	23	85	24	86	2e-21	84.7	16	1.5	84	112	57	MOLECULE: SERUM RESPONSE FACTOR;	NP_001964.2	NP_001964	60	73.85	65	26	0	21	85	21	85	1e-19	90.5	IPR000418; IPR011991	Y	ELK4	9606 [Organism: human] [Scientific Name: Homo sapiens]	Y	26	1BC8-C	-	-	-	-	-	-	-	-	-
1HBX	G	P28324	gi|14719548|pdb|1HBX|G	61.9	74.6	63	24	0	23	85	24	86	2e-21	84.7	16	1.5	84	112	57	MOLECULE: SERUM RESPONSE FACTOR;	NP_001964.2	NP_001964	60	73.85	65	26	0	21	85	21	85	1e-19	90.5	IPR000418; IPR011991	Y	ELK4	9606 [Organism: human] [Scientific Name: Homo sapiens]	Y	26	1BC8-C	-	-	-	-	-	-	-	-	-
1HBX	G	P28324	gi|14719548|pdb|1HBX|G	61.9	74.6	63	24	0	23	85	24	86	2e-21	84.7	16	1.5	84	112	57	MOLECULE: SERUM RESPONSE FACTOR;	NP_001964.2	NP_001964	60	73.85	65	26	0	21	85	21	85	1e-19	90.5	IPR000418; IPR011991	Y	ELK4	9606 [Organism: human] [Scientific Name: Homo sapiens]	Y	26	1BC8-C	-	-	-	-	-	-	-	-	-
1HBX	G	P28324	gi|14719548|pdb|1HBX|G	61.9	74.6	63	24	0	23	85	24	86	2e-21	84.7	16	1.5	84	112	57	MOLECULE: SERUM RESPONSE FACTOR;	NP_001964.2	NP_001964	60	73.85	65	26	0	21	85	21	85	1e-19	90.5	IPR000418; IPR011991	Y	ELK4	9606 [Organism: human] [Scientific Name: Homo sapiens]	Y	26	1BC8-C	-	-	-	-	-	-	-	-	-
1HBX	G	P28324	gi|14719548|pdb|1HBX|G	61.9	74.6	63	24	0	23	85	24	86	2e-21	84.7	16	1.5	84	112	57	MOLECULE: SERUM RESPONSE FACTOR;	NP_001964.2	NP_001964	60	73.85	65	26	0	21	85	21	85	1e-19	90.5	IPR000418; IPR011991	Y	ELK4	9606 [Organism: human] [Scientific Name: Homo sapiens]	Y	26	1BC8-C	-	-	-	-	-	-	-	-	-
1HBX	G	P28324	gi|14719548|pdb|1HBX|G	61.9	74.6	63	24	0	23	85	24	86	2e-21	84.7	16	1.5	84	112	57	MOLECULE: SERUM RESPONSE FACTOR;	NP_001964.2	NP_001964	60	73.85	65	26	0	21	85	21	85	1e-19	90.5	IPR000418; IPR011991	Y	ELK4	9606 [Organism: human] [Scientific Name: Homo sapiens]	Y	26	1BC8-C	-	-	-	-	-	-	-	-	-
1HBX	G	P28324	gi|14719548|pdb|1HBX|G	61.9	74.6	63	24	0	23	85	24	86	2e-21	84.7	16	1.5	84	112	57	MOLECULE: SERUM RESPONSE FACTOR;	NP_001964.2	NP_001964	60	73.85	65	26	0	21	85	21	85	1e-19	90.5	IPR000418; IPR011991	Y	ELK4	9606 [Organism: human] [Scientific Name: Homo sapiens]	Y	26	1BC8-C	-	-	-	-	-	-	-	-	-
1HBX	G	P28324	gi|14719548|pdb|1HBX|G	61.9	74.6	63	24	0	23	85	24	86	2e-21	84.7	16	1.5	84	112	57	MOLECULE: SERUM RESPONSE FACTOR;	NP_001964.2	NP_001964	60	73.85	65	26	0	21	85	21	85	1e-19	90.5	IPR000418; IPR011991	Y	ELK4	9606 [Organism: human] [Scientific Name: Homo sapiens]	Y	26	1BC8-C	-	-	-	-	-	-	-	-	-
1HBX	G	P28324	gi|14719548|pdb|1HBX|G	61.9	74.6	63	24	0	23	85	24	86	2e-21	84.7	16	1.5	84	112	57	MOLECULE: SERUM RESPONSE FACTOR;	NP_001964.2	NP_001964	60	73.85	65	26	0	21	85	21	85	1e-19	90.5	IPR000418; IPR011991	Y	ELK4	9606 [Organism: human] [Scientific Name: Homo sapiens]	Y	26	1BC8-C	-	-	-	-	-	-	-	-	-
1HBX	G	P28324	gi|14719548|pdb|1HBX|G	61.9	74.6	63	24	0	23	85	24	86	2e-21	84.7	16	1.5	84	112	57	MOLECULE: SERUM RESPONSE FACTOR;	NP_001964.2	NP_001964	60	73.85	65	26	0	21	85	21	85	1e-19	90.5	IPR000418; IPR011991	Y	ELK4	9606 [Organism: human] [Scientific Name: Homo sapiens]	Y	26	1BC8-C	-	-	-	-	-	-	-	-	-
1HBX	G	P28324	gi|14719548|pdb|1HBX|G	61.9	74.6	63	24	0	23	85	24	86	2e-21	84.7	16	1.5	84	112	57	MOLECULE: SERUM RESPONSE FACTOR;	NP_001964.2	NP_001964	60	73.85	65	26	0	21	85	21	85	1e-19	90.5	IPR000418; IPR011991	Y	ELK4	9606 [Organism: human] [Scientific Name: Homo sapiens]	Y	26	1BC8-C	-	-	-	-	-	-	-	-	-
1HBX	G	P28324	gi|14719548|pdb|1HBX|G	61.9	74.6	63	24	0	23	85	24	86	2e-21	84.7	16	1.5	84	112	57	MOLECULE: SERUM RESPONSE FACTOR;	NP_001964.2	NP_001964	60	73.85	65	26	0	21	85	21	85	1e-19	90.5	IPR000418; IPR011991	Y	ELK4	9606 [Organism: human] [Scientific Name: Homo sapiens]	Y	26	1BC8-C	-	-	-	-	-	-	-	-	-
1HBX	G	P28324	gi|14719548|pdb|1HBX|G	61.9	74.6	63	24	0	23	85	24	86	2e-21	84.7	16	1.5	84	112	57	MOLECULE: SERUM RESPONSE FACTOR;	NP_001964.2	NP_001964	60	73.85	65	26	0	21	85	21	85	1e-19	90.5	IPR000418; IPR011991	Y	ELK4	9606 [Organism: human] [Scientific Name: Homo sapiens]	Y	26	1BC8-C	-	-	-	-	-	-	-	-	-
1HBX	G	P28324	gi|14719548|pdb|1HBX|G	61.9	74.6	63	24	0	23	85	24	86	2e-21	84.7	16	1.5	84	112	57	MOLECULE: SERUM RESPONSE FACTOR;	NP_001964.2	NP_001964	60	73.85	65	26	0	21	85	21	85	1e-19	90.5	IPR000418; IPR011991	Y	ELK4	9606 [Organism: human] [Scientific Name: Homo sapiens]	Y	26	1BC8-C	-	-	-	-	-	-	-	-	-
1HBX	G	P28324	gi|14719548|pdb|1HBX|G	61.9	74.6	63	24	0	23	85	24	86	2e-21	84.7	16	1.5	84	112	57	MOLECULE: SERUM RESPONSE FACTOR;	NP_001964.2	NP_001964	60	73.85	65	26	0	21	85	21	85	1e-19	90.5	IPR000418; IPR011991	Y	ELK4	9606 [Organism: human] [Scientific Name: Homo sapiens]	Y	26	1BC8-C	-	-	-	-	-	-	-	-	-
1HBX	G	P28324	gi|14719548|pdb|1HBX|G	61.9	74.6	63	24	0	23	85	24	86	2e-21	84.7	16	1.5	84	112	57	MOLECULE: SERUM RESPONSE FACTOR;	NP_001964.2	NP_001964	60	73.85	65	26	0	21	85	21	85	1e-19	90.5	IPR000418; IPR011991	Y	ELK4	9606 [Organism: human] [Scientific Name: Homo sapiens]	Y	26	1BC8-C	-	-	-	-	-	-	-	-	-
1HBX	G	P28324	gi|14719548|pdb|1HBX|G	61.9	74.6	63	24	0	23	85	24	86	2e-21	84.7	16	1.5	84	112	57	MOLECULE: SERUM RESPONSE FACTOR;	NP_001964.2	NP_001964	60	73.85	65	26	0	21	85	21	85	1e-19	90.5	IPR000418; IPR011991	Y	ELK4	9606 [Organism: human] [Scientific Name: Homo sapiens]	Y	26	1BC8-C	-	-	-	-	-	-	-	-	-
1HBX	G	P28324	gi|14719548|pdb|1HBX|G	61.9	74.6	63	24	0	23	85	24	86	2e-21	84.7	16	1.5	84	112	57	MOLECULE: SERUM RESPONSE FACTOR;	NP_001964.2	NP_001964	60	73.85	65	26	0	21	85	21	85	1e-19	90.5	IPR000418; IPR011991	Y	ELK4	9606 [Organism: human] [Scientific Name: Homo sapiens]	Y	26	1BC8-C	-	-	-	-	-	-	-	-	-
1HBX	G	P28324	gi|14719548|pdb|1HBX|G	61.9	74.6	63	24	0	23	85	24	86	2e-21	84.7	16	1.5	84	112	57	MOLECULE: SERUM RESPONSE FACTOR;	NP_001964.2	NP_001964	60	73.85	65	26	0	21	85	21	85	1e-19	90.5	IPR000418; IPR011991	Y	ELK4	9606 [Organism: human] [Scientific Name: Homo sapiens]	Y	26	1BC8-C	-	-	-	-	-	-	-	-	-
1HBX	G	P28324	gi|14719548|pdb|1HBX|G	61.9	74.6	63	24	0	23	85	24	86	2e-21	84.7	16	1.5	84	112	57	MOLECULE: SERUM RESPONSE FACTOR;	NP_001964.2	NP_001964	60	73.85	65	26	0	21	85	21	85	1e-19	90.5	IPR000418; IPR011991	Y	ELK4	9606 [Organism: human] [Scientific Name: Homo sapiens]	Y	26	1BC8-C	-	-	-	-	-	-	-	-	-
1HBX	G	P28324	gi|14719548|pdb|1HBX|G	61.9	74.6	63	24	0	23	85	24	86	2e-21	84.7	16	1.5	84	112	57	MOLECULE: SERUM RESPONSE FACTOR;	NP_001964.2	NP_001964	60	73.85	65	26	0	21	85	21	85	1e-19	90.5	IPR000418; IPR011991	Y	ELK4	9606 [Organism: human] [Scientific Name: Homo sapiens]	Y	26	1BC8-C	-	-	-	-	-	-	-	-	-
1HBX	G	P28324	gi|14719548|pdb|1HBX|G	61.9	74.6	63	24	0	23	85	24	86	2e-21	84.7	16	1.5	84	112	57	MOLECULE: SERUM RESPONSE FACTOR;	NP_001964.2	NP_001964	60	73.85	65	26	0	21	85	21	85	1e-19	90.5	IPR000418; IPR011991	Y	ELK4	9606 [Organism: human] [Scientific Name: Homo sapiens]	Y	26	1BC8-C	-	-	-	-	-	-	-	-	-
1HBX	G	P28324	gi|14719548|pdb|1HBX|G	61.9	74.6	63	24	0	23	85	24	86	2e-21	84.7	16	1.5	84	112	57	MOLECULE: SERUM RESPONSE FACTOR;	NP_001964.2	NP_001964	60	73.85	65	26	0	21	85	21	85	1e-19	90.5	IPR000418; IPR011991	Y	ELK4	9606 [Organism: human] [Scientific Name: Homo sapiens]	Y	26	1BC8-C	-	-	-	-	-	-	-	-	-
1HBX	G	P28324	gi|14719548|pdb|1HBX|G	61.9	74.6	63	24	0	23	85	24	86	2e-21	84.7	16	1.5	84	112	57	MOLECULE: SERUM RESPONSE FACTOR;	NP_001964.2	NP_001964	60	73.85	65	26	0	21	85	21	85	1e-19	90.5	IPR000418; IPR011991	Y	ELK4	9606 [Organism: human] [Scientific Name: Homo sapiens]	Y	26	1BC8-C	-	-	-	-	-	-	-	-	-
1HBX	G	P28324	gi|14719548|pdb|1HBX|G	61.9	74.6	63	24	0	23	85	24	86	2e-21	84.7	16	1.5	84	112	57	MOLECULE: SERUM RESPONSE FACTOR;	NP_001964.2	NP_001964	60	73.85	65	26	0	21	85	21	85	1e-19	90.5	IPR000418; IPR011991	Y	ELK4	9606 [Organism: human] [Scientific Name: Homo sapiens]	Y	26	1BC8-C	-	-	-	-	-	-	-	-	-
1HBX	G	P28324	gi|14719548|pdb|1HBX|G	61.9	74.6	63	24	0	23	85	24	86	2e-21	84.7	16	1.5	84	112	57	MOLECULE: SERUM RESPONSE FACTOR;	NP_001964.2	NP_001964	60	73.85	65	26	0	21	85	21	85	1e-19	90.5	IPR000418; IPR011991	Y	ELK4	9606 [Organism: human] [Scientific Name: Homo sapiens]	Y	26	1BC8-C	-	-	-	-	-	-	-	-	-
1HBX	G	P28324	gi|14719548|pdb|1HBX|G	61.9	74.6	63	24	0	23	85	24	86	2e-21	84.7	16	1.5	84	112	57	MOLECULE: SERUM RESPONSE FACTOR;	NP_001964.2	NP_001964	60	73.85	65	26	0	21	85	21	85	1e-19	90.5	IPR000418; IPR011991	Y	ELK4	9606 [Organism: human] [Scientific Name: Homo sapiens]	Y	26	1BC8-C	-	-	-	-	-	-	-	-	-
1HBX	G	P28324	gi|14719548|pdb|1HBX|G	61.9	74.6	63	24	0	23	85	24	86	2e-21	84.7	16	1.5	84	112	57	MOLECULE: SERUM RESPONSE FACTOR;	NP_068567.1	NP_068567	60	73.85	65	26	0	21	85	21	85	9e-20	90.5	IPR000418; IPR011991	Y	ELK4	9606 [Organism: human] [Scientific Name: Homo sapiens]	Y	26	1BC8-C	-	-	-	-	-	-	-	-	-
1HBX	G	P28324	gi|14719548|pdb|1HBX|G	61.9	74.6	63	24	0	23	85	24	86	2e-21	84.7	16	1.5	84	112	57	MOLECULE: SERUM RESPONSE FACTOR;	NP_068567.1	NP_068567	60	73.85	65	26	0	21	85	21	85	9e-20	90.5	IPR000418; IPR011991	Y	ELK4	9606 [Organism: human] [Scientific Name: Homo sapiens]	Y	26	1BC8-C	-	-	-	-	-	-	-	-	-
1HBX	G	P28324	gi|14719548|pdb|1HBX|G	61.9	74.6	63	24	0	23	85	24	86	2e-21	84.7	16	1.5	84	112	57	MOLECULE: SERUM RESPONSE FACTOR;	NP_068567.1	NP_068567	60	73.85	65	26	0	21	85	21	85	9e-20	90.5	IPR000418; IPR011991	Y	ELK4	9606 [Organism: human] [Scientific Name: Homo sapiens]	Y	26	1BC8-C	-	-	-	-	-	-	-	-	-
1HBX	G	P28324	gi|14719548|pdb|1HBX|G	61.9	74.6	63	24	0	23	85	24	86	2e-21	84.7	16	1.5	84	112	57	MOLECULE: SERUM RESPONSE FACTOR;	NP_068567.1	NP_068567	60	73.85	65	26	0	21	85	21	85	9e-20	90.5	IPR000418; IPR011991	Y	ELK4	9606 [Organism: human] [Scientific Name: Homo sapiens]	Y	26	1BC8-C	-	-	-	-	-	-	-	-	-
1HBX	G	P28324	gi|14719548|pdb|1HBX|G	61.9	74.6	63	24	0	23	85	24	86	2e-21	84.7	16	1.5	84	112	57	MOLECULE: SERUM RESPONSE FACTOR;	NP_068567.1	NP_068567	60	73.85	65	26	0	21	85	21	85	9e-20	90.5	IPR000418; IPR011991	Y	ELK4	9606 [Organism: human] [Scientific Name: Homo sapiens]	Y	26	1BC8-C	-	-	-	-	-	-	-	-	-
1HBX	G	P28324	gi|14719548|pdb|1HBX|G	61.9	74.6	63	24	0	23	85	24	86	2e-21	84.7	16	1.5	84	112	57	MOLECULE: SERUM RESPONSE FACTOR;	NP_068567.1	NP_068567	60	73.85	65	26	0	21	85	21	85	9e-20	90.5	IPR000418; IPR011991	Y	ELK4	9606 [Organism: human] [Scientific Name: Homo sapiens]	Y	26	1BC8-C	-	-	-	-	-	-	-	-	-
1HBX	G	P28324	gi|14719548|pdb|1HBX|G	61.9	74.6	63	24	0	23	85	24	86	2e-21	84.7	16	1.5	84	112	57	MOLECULE: SERUM RESPONSE FACTOR;	NP_068567.1	NP_068567	60	73.85	65	26	0	21	85	21	85	9e-20	90.5	IPR000418; IPR011991	Y	ELK4	9606 [Organism: human] [Scientific Name: Homo sapiens]	Y	26	1BC8-C	-	-	-	-	-	-	-	-	-
1HBX	G	P28324	gi|14719548|pdb|1HBX|G	61.9	74.6	63	24	0	23	85	24	86	2e-21	84.7	16	1.5	84	112	57	MOLECULE: SERUM RESPONSE FACTOR;	NP_068567.1	NP_068567	60	73.85	65	26	0	21	85	21	85	9e-20	90.5	IPR000418; IPR011991	Y	ELK4	9606 [Organism: human] [Scientific Name: Homo sapiens]	Y	26	1BC8-C	-	-	-	-	-	-	-	-	-
1HBX	G	P28324	gi|14719548|pdb|1HBX|G	61.9	74.6	63	24	0	23	85	24	86	2e-21	84.7	16	1.5	84	112	57	MOLECULE: SERUM RESPONSE FACTOR;	NP_068567.1	NP_068567	60	73.85	65	26	0	21	85	21	85	9e-20	90.5	IPR000418; IPR011991	Y	ELK4	9606 [Organism: human] [Scientific Name: Homo sapiens]	Y	26	1BC8-C	-	-	-	-	-	-	-	-	-
1HBX	G	P28324	gi|14719548|pdb|1HBX|G	61.9	74.6	63	24	0	23	85	24	86	2e-21	84.7	16	1.5	84	112	57	MOLECULE: SERUM RESPONSE FACTOR;	NP_068567.1	NP_068567	60	73.85	65	26	0	21	85	21	85	9e-20	90.5	IPR000418; IPR011991	Y	ELK4	9606 [Organism: human] [Scientific Name: Homo sapiens]	Y	26	1BC8-C	-	-	-	-	-	-	-	-	-
1HBX	G	P28324	gi|14719548|pdb|1HBX|G	61.9	74.6	63	24	0	23	85	24	86	2e-21	84.7	16	1.5	84	112	57	MOLECULE: SERUM RESPONSE FACTOR;	NP_068567.1	NP_068567	60	73.85	65	26	0	21	85	21	85	9e-20	90.5	IPR000418; IPR011991	Y	ELK4	9606 [Organism: human] [Scientific Name: Homo sapiens]	Y	26	1BC8-C	-	-	-	-	-	-	-	-	-
1HBX	G	P28324	gi|14719548|pdb|1HBX|G	61.9	74.6	63	24	0	23	85	24	86	2e-21	84.7	16	1.5	84	112	57	MOLECULE: SERUM RESPONSE FACTOR;	NP_068567.1	NP_068567	60	73.85	65	26	0	21	85	21	85	9e-20	90.5	IPR000418; IPR011991	Y	ELK4	9606 [Organism: human] [Scientific Name: Homo sapiens]	Y	26	1BC8-C	-	-	-	-	-	-	-	-	-
1HBX	G	P28324	gi|14719548|pdb|1HBX|G	61.9	74.6	63	24	0	23	85	24	86	2e-21	84.7	16	1.5	84	112	57	MOLECULE: SERUM RESPONSE FACTOR;	NP_068567.1	NP_068567	60	73.85	65	26	0	21	85	21	85	9e-20	90.5	IPR000418; IPR011991	Y	ELK4	9606 [Organism: human] [Scientific Name: Homo sapiens]	Y	26	1BC8-C	-	-	-	-	-	-	-	-	-
1HBX	G	P28324	gi|14719548|pdb|1HBX|G	61.9	74.6	63	24	0	23	85	24	86	2e-21	84.7	16	1.5	84	112	57	MOLECULE: SERUM RESPONSE FACTOR;	NP_068567.1	NP_068567	60	73.85	65	26	0	21	85	21	85	9e-20	90.5	IPR000418; IPR011991	Y	ELK4	9606 [Organism: human] [Scientific Name: Homo sapiens]	Y	26	1BC8-C	-	-	-	-	-	-	-	-	-
1HBX	G	P28324	gi|14719548|pdb|1HBX|G	61.9	74.6	63	24	0	23	85	24	86	2e-21	84.7	16	1.5	84	112	57	MOLECULE: SERUM RESPONSE FACTOR;	NP_068567.1	NP_068567	60	73.85	65	26	0	21	85	21	85	9e-20	90.5	IPR000418; IPR011991	Y	ELK4	9606 [Organism: human] [Scientific Name: Homo sapiens]	Y	26	1BC8-C	-	-	-	-	-	-	-	-	-
1HBX	G	P28324	gi|14719548|pdb|1HBX|G	61.9	74.6	63	24	0	23	85	24	86	2e-21	84.7	16	1.5	84	112	57	MOLECULE: SERUM RESPONSE FACTOR;	NP_068567.1	NP_068567	60	73.85	65	26	0	21	85	21	85	9e-20	90.5	IPR000418; IPR011991	Y	ELK4	9606 [Organism: human] [Scientific Name: Homo sapiens]	Y	26	1BC8-C	-	-	-	-	-	-	-	-	-
1HBX	G	P28324	gi|14719548|pdb|1HBX|G	61.9	74.6	63	24	0	23	85	24	86	2e-21	84.7	16	1.5	84	112	57	MOLECULE: SERUM RESPONSE FACTOR;	NP_068567.1	NP_068567	60	73.85	65	26	0	21	85	21	85	9e-20	90.5	IPR000418; IPR011991	Y	ELK4	9606 [Organism: human] [Scientific Name: Homo sapiens]	Y	26	1BC8-C	-	-	-	-	-	-	-	-	-
1HBX	G	P28324	gi|14719548|pdb|1HBX|G	61.9	74.6	63	24	0	23	85	24	86	2e-21	84.7	16	1.5	84	112	57	MOLECULE: SERUM RESPONSE FACTOR;	NP_068567.1	NP_068567	60	73.85	65	26	0	21	85	21	85	9e-20	90.5	IPR000418; IPR011991	Y	ELK4	9606 [Organism: human] [Scientific Name: Homo sapiens]	Y	26	1BC8-C	-	-	-	-	-	-	-	-	-
1HBX	G	P28324	gi|14719548|pdb|1HBX|G	61.9	74.6	63	24	0	23	85	24	86	2e-21	84.7	16	1.5	84	112	57	MOLECULE: SERUM RESPONSE FACTOR;	NP_068567.1	NP_068567	60	73.85	65	26	0	21	85	21	85	9e-20	90.5	IPR000418; IPR011991	Y	ELK4	9606 [Organism: human] [Scientific Name: Homo sapiens]	Y	26	1BC8-C	-	-	-	-	-	-	-	-	-
1HBX	G	P28324	gi|14719548|pdb|1HBX|G	61.9	74.6	63	24	0	23	85	24	86	2e-21	84.7	16	1.5	84	112	57	MOLECULE: SERUM RESPONSE FACTOR;	NP_068567.1	NP_068567	60	73.85	65	26	0	21	85	21	85	9e-20	90.5	IPR000418; IPR011991	Y	ELK4	9606 [Organism: human] [Scientific Name: Homo sapiens]	Y	26	1BC8-C	-	-	-	-	-	-	-	-	-
1HBX	G	P28324	gi|14719548|pdb|1HBX|G	61.9	74.6	63	24	0	23	85	24	86	2e-21	84.7	16	1.5	84	112	57	MOLECULE: SERUM RESPONSE FACTOR;	NP_068567.1	NP_068567	60	73.85	65	26	0	21	85	21	85	9e-20	90.5	IPR000418; IPR011991	Y	ELK4	9606 [Organism: human] [Scientific Name: Homo sapiens]	Y	26	1BC8-C	-	-	-	-	-	-	-	-	-
1HBX	G	P28324	gi|14719548|pdb|1HBX|G	61.9	74.6	63	24	0	23	85	24	86	2e-21	84.7	16	1.5	84	112	57	MOLECULE: SERUM RESPONSE FACTOR;	NP_068567.1	NP_068567	60	73.85	65	26	0	21	85	21	85	9e-20	90.5	IPR000418; IPR011991	Y	ELK4	9606 [Organism: human] [Scientific Name: Homo sapiens]	Y	26	1BC8-C	-	-	-	-	-	-	-	-	-
1HBX	G	P28324	gi|14719548|pdb|1HBX|G	61.9	74.6	63	24	0	23	85	24	86	2e-21	84.7	16	1.5	84	112	57	MOLECULE: SERUM RESPONSE FACTOR;	NP_068567.1	NP_068567	60	73.85	65	26	0	21	85	21	85	9e-20	90.5	IPR000418; IPR011991	Y	ELK4	9606 [Organism: human] [Scientific Name: Homo sapiens]	Y	26	1BC8-C	-	-	-	-	-	-	-	-	-
1HBX	G	P28324	gi|14719548|pdb|1HBX|G	61.9	74.6	63	24	0	23	85	24	86	2e-21	84.7	16	1.5	84	112	57	MOLECULE: SERUM RESPONSE FACTOR;	NP_068567.1	NP_068567	60	73.85	65	26	0	21	85	21	85	9e-20	90.5	IPR000418; IPR011991	Y	ELK4	9606 [Organism: human] [Scientific Name: Homo sapiens]	Y	26	1BC8-C	-	-	-	-	-	-	-	-	-
1HBX	G	P28324	gi|14719548|pdb|1HBX|G	61.9	74.6	63	24	0	23	85	24	86	2e-21	84.7	16	1.5	84	112	57	MOLECULE: SERUM RESPONSE FACTOR;	NP_068567.1	NP_068567	60	73.85	65	26	0	21	85	21	85	9e-20	90.5	IPR000418; IPR011991	Y	ELK4	9606 [Organism: human] [Scientific Name: Homo sapiens]	Y	26	1BC8-C	-	-	-	-	-	-	-	-	-
1HBX	G	P28324	gi|14719548|pdb|1HBX|G	61.9	74.6	63	24	0	23	85	24	86	2e-21	84.7	16	1.5	84	112	57	MOLECULE: SERUM RESPONSE FACTOR;	NP_068567.1	NP_068567	60	73.85	65	26	0	21	85	21	85	9e-20	90.5	IPR000418; IPR011991	Y	ELK4	9606 [Organism: human] [Scientific Name: Homo sapiens]	Y	26	1BC8-C	-	-	-	-	-	-	-	-	-
1HBX	G	P28324	gi|14719548|pdb|1HBX|G	61.9	74.6	63	24	0	23	85	24	86	2e-21	84.7	16	1.5	84	112	57	MOLECULE: SERUM RESPONSE FACTOR;	NP_068567.1	NP_068567	60	73.85	65	26	0	21	85	21	85	9e-20	90.5	IPR000418; IPR011991	Y	ELK4	9606 [Organism: human] [Scientific Name: Homo sapiens]	Y	26	1BC8-C	-	-	-	-	-	-	-	-	-
1HBX	G	P28324	gi|14719548|pdb|1HBX|G	61.9	74.6	63	24	0	23	85	24	86	2e-21	84.7	16	1.5	84	112	57	MOLECULE: SERUM RESPONSE FACTOR;	NP_068567.1	NP_068567	60	73.85	65	26	0	21	85	21	85	9e-20	90.5	IPR000418; IPR011991	Y	ELK4	9606 [Organism: human] [Scientific Name: Homo sapiens]	Y	26	1BC8-C	-	-	-	-	-	-	-	-	-
1HBX	G	P28324	gi|14719548|pdb|1HBX|G	61.9	74.6	63	24	0	23	85	24	86	2e-21	84.7	16	1.5	84	112	57	MOLECULE: SERUM RESPONSE FACTOR;	NP_068567.1	NP_068567	60	73.85	65	26	0	21	85	21	85	9e-20	90.5	IPR000418; IPR011991	Y	ELK4	9606 [Organism: human] [Scientific Name: Homo sapiens]	Y	26	1BC8-C	-	-	-	-	-	-	-	-	-
1HBX	G	P28324	gi|14719548|pdb|1HBX|G	61.9	74.6	63	24	0	23	85	24	86	2e-21	84.7	16	1.5	84	112	57	MOLECULE: SERUM RESPONSE FACTOR;	NP_068567.1	NP_068567	60	73.85	65	26	0	21	85	21	85	9e-20	90.5	IPR000418; IPR011991	Y	ELK4	9606 [Organism: human] [Scientific Name: Homo sapiens]	Y	26	1BC8-C	-	-	-	-	-	-	-	-	-
1HBX	G	P28324	gi|14719548|pdb|1HBX|G	61.9	74.6	63	24	0	23	85	24	86	2e-21	84.7	16	1.5	84	112	57	MOLECULE: SERUM RESPONSE FACTOR;	NP_068567.1	NP_068567	60	73.85	65	26	0	21	85	21	85	9e-20	90.5	IPR000418; IPR011991	Y	ELK4	9606 [Organism: human] [Scientific Name: Homo sapiens]	Y	26	1BC8-C	-	-	-	-	-	-	-	-	-
1HBX	G	P28324	gi|14719548|pdb|1HBX|G	61.9	74.6	63	24	0	23	85	24	86	2e-21	84.7	16	1.5	84	112	57	MOLECULE: SERUM RESPONSE FACTOR;	NP_068567.1	NP_068567	60	73.85	65	26	0	21	85	21	85	9e-20	90.5	IPR000418; IPR011991	Y	ELK4	9606 [Organism: human] [Scientific Name: Homo sapiens]	Y	26	1BC8-C	-	-	-	-	-	-	-	-	-
1HBX	G	P28324	gi|14719548|pdb|1HBX|G	61.9	74.6	63	24	0	23	85	24	86	2e-21	84.7	16	1.5	84	112	57	MOLECULE: SERUM RESPONSE FACTOR;	NP_068567.1	NP_068567	60	73.85	65	26	0	21	85	21	85	9e-20	90.5	IPR000418; IPR011991	Y	ELK4	9606 [Organism: human] [Scientific Name: Homo sapiens]	Y	26	1BC8-C	-	-	-	-	-	-	-	-	-
1HBX	G	P28324	gi|14719548|pdb|1HBX|G	61.9	74.6	63	24	0	23	85	24	86	2e-21	84.7	16	1.5	84	112	57	MOLECULE: SERUM RESPONSE FACTOR;	NP_068567.1	NP_068567	60	73.85	65	26	0	21	85	21	85	9e-20	90.5	IPR000418; IPR011991	Y	ELK4	9606 [Organism: human] [Scientific Name: Homo sapiens]	Y	26	1BC8-C	-	-	-	-	-	-	-	-	-
1HBX	G	P28324	gi|14719548|pdb|1HBX|G	61.9	74.6	63	24	0	23	85	24	86	2e-21	84.7	16	1.5	84	112	57	MOLECULE: SERUM RESPONSE FACTOR;	NP_068567.1	NP_068567	60	73.85	65	26	0	21	85	21	85	9e-20	90.5	IPR000418; IPR011991	Y	ELK4	9606 [Organism: human] [Scientific Name: Homo sapiens]	Y	26	1BC8-C	-	-	-	-	-	-	-	-	-
1HBX	G	P28324	gi|14719548|pdb|1HBX|G	61.9	74.6	63	24	0	23	85	24	86	2e-21	84.7	16	1.5	84	112	57	MOLECULE: SERUM RESPONSE FACTOR;	NP_068567.1	NP_068567	60	73.85	65	26	0	21	85	21	85	9e-20	90.5	IPR000418; IPR011991	Y	ELK4	9606 [Organism: human] [Scientific Name: Homo sapiens]	Y	26	1BC8-C	-	-	-	-	-	-	-	-	-
1HBX	G	P28324	gi|14719548|pdb|1HBX|G	61.9	74.6	63	24	0	23	85	24	86	2e-21	84.7	16	1.5	84	112	57	MOLECULE: SERUM RESPONSE FACTOR;	NP_068567.1	NP_068567	60	73.85	65	26	0	21	85	21	85	9e-20	90.5	IPR000418; IPR011991	Y	ELK4	9606 [Organism: human] [Scientific Name: Homo sapiens]	Y	26	1BC8-C	-	-	-	-	-	-	-	-	-
1HBX	G	P28324	gi|14719548|pdb|1HBX|G	61.9	74.6	63	24	0	23	85	24	86	2e-21	84.7	16	1.5	84	112	57	MOLECULE: SERUM RESPONSE FACTOR;	NP_068567.1	NP_068567	60	73.85	65	26	0	21	85	21	85	9e-20	90.5	IPR000418; IPR011991	Y	ELK4	9606 [Organism: human] [Scientific Name: Homo sapiens]	Y	26	1BC8-C	-	-	-	-	-	-	-	-	-
1HBX	G	P28324	gi|14719548|pdb|1HBX|G	61.9	74.6	63	24	0	23	85	24	86	2e-21	84.7	16	1.5	84	112	57	MOLECULE: SERUM RESPONSE FACTOR;	NP_068567.1	NP_068567	60	73.85	65	26	0	21	85	21	85	9e-20	90.5	IPR000418; IPR011991	Y	ELK4	9606 [Organism: human] [Scientific Name: Homo sapiens]	Y	26	1BC8-C	-	-	-	-	-	-	-	-	-
1HBX	G	P28324	gi|14719548|pdb|1HBX|G	61.9	74.6	63	24	0	23	85	24	86	2e-21	84.7	16	1.5	84	112	57	MOLECULE: SERUM RESPONSE FACTOR;	NP_068567.1	NP_068567	60	73.85	65	26	0	21	85	21	85	9e-20	90.5	IPR000418; IPR011991	Y	ELK4	9606 [Organism: human] [Scientific Name: Homo sapiens]	Y	26	1BC8-C	-	-	-	-	-	-	-	-	-
1HBX	G	P28324	gi|14719548|pdb|1HBX|G	61.9	74.6	63	24	0	23	85	24	86	2e-21	84.7	16	1.5	84	112	57	MOLECULE: SERUM RESPONSE FACTOR;	NP_068567.1	NP_068567	60	73.85	65	26	0	21	85	21	85	9e-20	90.5	IPR000418; IPR011991	Y	ELK4	9606 [Organism: human] [Scientific Name: Homo sapiens]	Y	26	1BC8-C	-	-	-	-	-	-	-	-	-
1HBX	G	P28324	gi|14719548|pdb|1HBX|G	61.9	74.6	63	24	0	23	85	24	86	2e-21	84.7	16	1.5	84	112	57	MOLECULE: SERUM RESPONSE FACTOR;	NP_068567.1	NP_068567	60	73.85	65	26	0	21	85	21	85	9e-20	90.5	IPR000418; IPR011991	Y	ELK4	9606 [Organism: human] [Scientific Name: Homo sapiens]	Y	26	1BC8-C	-	-	-	-	-	-	-	-	-
1HBX	G	P28324	gi|14719548|pdb|1HBX|G	61.9	74.6	63	24	0	23	85	24	86	2e-21	84.7	16	1.5	84	112	57	MOLECULE: SERUM RESPONSE FACTOR;	NP_068567.1	NP_068567	60	73.85	65	26	0	21	85	21	85	9e-20	90.5	IPR000418; IPR011991	Y	ELK4	9606 [Organism: human] [Scientific Name: Homo sapiens]	Y	26	1BC8-C	-	-	-	-	-	-	-	-	-
1HBX	G	P28324	gi|14719548|pdb|1HBX|G	61.9	74.6	63	24	0	23	85	24	86	2e-21	84.7	16	1.5	84	112	57	MOLECULE: SERUM RESPONSE FACTOR;	NP_068567.1	NP_068567	60	73.85	65	26	0	21	85	21	85	9e-20	90.5	IPR000418; IPR011991	Y	ELK4	9606 [Organism: human] [Scientific Name: Homo sapiens]	Y	26	1BC8-C	-	-	-	-	-	-	-	-	-
1HBX	G	P28324	gi|14719548|pdb|1HBX|G	61.9	74.6	63	24	0	23	85	24	86	2e-21	84.7	16	1.5	84	112	57	MOLECULE: SERUM RESPONSE FACTOR;	NP_068567.1	NP_068567	60	73.85	65	26	0	21	85	21	85	9e-20	90.5	IPR000418; IPR011991	Y	ELK4	9606 [Organism: human] [Scientific Name: Homo sapiens]	Y	26	1BC8-C	-	-	-	-	-	-	-	-	-
1HBX	G	P28324	gi|14719548|pdb|1HBX|G	61.9	74.6	63	24	0	23	85	24	86	2e-21	84.7	16	1.5	84	112	57	MOLECULE: SERUM RESPONSE FACTOR;	NP_068567.1	NP_068567	60	73.85	65	26	0	21	85	21	85	9e-20	90.5	IPR000418; IPR011991	Y	ELK4	9606 [Organism: human] [Scientific Name: Homo sapiens]	Y	26	1BC8-C	-	-	-	-	-	-	-	-	-
1HBX	G	P28324	gi|14719548|pdb|1HBX|G	61.9	74.6	63	24	0	23	85	24	86	2e-21	84.7	16	1.5	84	112	57	MOLECULE: SERUM RESPONSE FACTOR;	NP_068567.1	NP_068567	60	73.85	65	26	0	21	85	21	85	9e-20	90.5	IPR000418; IPR011991	Y	ELK4	9606 [Organism: human] [Scientific Name: Homo sapiens]	Y	26	1BC8-C	-	-	-	-	-	-	-	-	-
1HBX	G	P28324	gi|14719548|pdb|1HBX|G	61.9	74.6	63	24	0	23	85	24	86	2e-21	84.7	16	1.5	84	112	57	MOLECULE: SERUM RESPONSE FACTOR;	NP_068567.1	NP_068567	60	73.85	65	26	0	21	85	21	85	9e-20	90.5	IPR000418; IPR011991	Y	ELK4	9606 [Organism: human] [Scientific Name: Homo sapiens]	Y	26	1BC8-C	-	-	-	-	-	-	-	-	-
1HBX	G	P28324	gi|14719548|pdb|1HBX|G	61.9	74.6	63	24	0	23	85	24	86	2e-21	84.7	16	1.5	84	112	57	MOLECULE: SERUM RESPONSE FACTOR;	NP_068567.1	NP_068567	60	73.85	65	26	0	21	85	21	85	9e-20	90.5	IPR000418; IPR011991	Y	ELK4	9606 [Organism: human] [Scientific Name: Homo sapiens]	Y	26	1BC8-C	-	-	-	-	-	-	-	-	-
1K6O	A	P28324	gi|18655798|pdb|1K6O|A	60	73.85	65	26	0	21	85	21	85	3e-22	84.7	16.7	1.1	83	89	58	MOLECULE: ETS-DOMAIN PROTEIN ELK-4;	NP_001964.2	NP_001964	60	73.85	65	26	0	21	85	21	85	1e-19	90.5	IPR000418; IPR011991	Y	ELK4	9606 [Organism: human] [Scientific Name: Homo sapiens]	Y	26	1BC8-C	-	-	-	-	-	-	-	-	-
1K6O	A	P28324	gi|18655798|pdb|1K6O|A	60	73.85	65	26	0	21	85	21	85	3e-22	84.7	16.7	1.1	83	89	58	MOLECULE: ETS-DOMAIN PROTEIN ELK-4;	NP_001964.2	NP_001964	60	73.85	65	26	0	21	85	21	85	1e-19	90.5	IPR000418; IPR011991	Y	ELK4	9606 [Organism: human] [Scientific Name: Homo sapiens]	Y	26	1BC8-C	-	-	-	-	-	-	-	-	-
1K6O	A	P28324	gi|18655798|pdb|1K6O|A	60	73.85	65	26	0	21	85	21	85	3e-22	84.7	16.7	1.1	83	89	58	MOLECULE: ETS-DOMAIN PROTEIN ELK-4;	NP_001964.2	NP_001964	60	73.85	65	26	0	21	85	21	85	1e-19	90.5	IPR000418; IPR011991	Y	ELK4	9606 [Organism: human] [Scientific Name: Homo sapiens]	Y	26	1BC8-C	-	-	-	-	-	-	-	-	-
1K6O	A	P28324	gi|18655798|pdb|1K6O|A	60	73.85	65	26	0	21	85	21	85	3e-22	84.7	16.7	1.1	83	89	58	MOLECULE: ETS-DOMAIN PROTEIN ELK-4;	NP_001964.2	NP_001964	60	73.85	65	26	0	21	85	21	85	1e-19	90.5	IPR000418; IPR011991	Y	ELK4	9606 [Organism: human] [Scientific Name: Homo sapiens]	Y	26	1BC8-C	-	-	-	-	-	-	-	-	-
1K6O	A	P28324	gi|18655798|pdb|1K6O|A	60	73.85	65	26	0	21	85	21	85	3e-22	84.7	16.7	1.1	83	89	58	MOLECULE: ETS-DOMAIN PROTEIN ELK-4;	NP_001964.2	NP_001964	60	73.85	65	26	0	21	85	21	85	1e-19	90.5	IPR000418; IPR011991	Y	ELK4	9606 [Organism: human] [Scientific Name: Homo sapiens]	Y	26	1BC8-C	-	-	-	-	-	-	-	-	-
1K6O	A	P28324	gi|18655798|pdb|1K6O|A	60	73.85	65	26	0	21	85	21	85	3e-22	84.7	16.7	1.1	83	89	58	MOLECULE: ETS-DOMAIN PROTEIN ELK-4;	NP_001964.2	NP_001964	60	73.85	65	26	0	21	85	21	85	1e-19	90.5	IPR000418; IPR011991	Y	ELK4	9606 [Organism: human] [Scientific Name: Homo sapiens]	Y	26	1BC8-C	-	-	-	-	-	-	-	-	-
1K6O	A	P28324	gi|18655798|pdb|1K6O|A	60	73.85	65	26	0	21	85	21	85	3e-22	84.7	16.7	1.1	83	89	58	MOLECULE: ETS-DOMAIN PROTEIN ELK-4;	NP_001964.2	NP_001964	60	73.85	65	26	0	21	85	21	85	1e-19	90.5	IPR000418; IPR011991	Y	ELK4	9606 [Organism: human] [Scientific Name: Homo sapiens]	Y	26	1BC8-C	-	-	-	-	-	-	-	-	-
1K6O	A	P28324	gi|18655798|pdb|1K6O|A	60	73.85	65	26	0	21	85	21	85	3e-22	84.7	16.7	1.1	83	89	58	MOLECULE: ETS-DOMAIN PROTEIN ELK-4;	NP_001964.2	NP_001964	60	73.85	65	26	0	21	85	21	85	1e-19	90.5	IPR000418; IPR011991	Y	ELK4	9606 [Organism: human] [Scientific Name: Homo sapiens]	Y	26	1BC8-C	-	-	-	-	-	-	-	-	-
1K6O	A	P28324	gi|18655798|pdb|1K6O|A	60	73.85	65	26	0	21	85	21	85	3e-22	84.7	16.7	1.1	83	89	58	MOLECULE: ETS-DOMAIN PROTEIN ELK-4;	NP_001964.2	NP_001964	60	73.85	65	26	0	21	85	21	85	1e-19	90.5	IPR000418; IPR011991	Y	ELK4	9606 [Organism: human] [Scientific Name: Homo sapiens]	Y	26	1BC8-C	-	-	-	-	-	-	-	-	-
1K6O	A	P28324	gi|18655798|pdb|1K6O|A	60	73.85	65	26	0	21	85	21	85	3e-22	84.7	16.7	1.1	83	89	58	MOLECULE: ETS-DOMAIN PROTEIN ELK-4;	NP_001964.2	NP_001964	60	73.85	65	26	0	21	85	21	85	1e-19	90.5	IPR000418; IPR011991	Y	ELK4	9606 [Organism: human] [Scientific Name: Homo sapiens]	Y	26	1BC8-C	-	-	-	-	-	-	-	-	-
1K6O	A	P28324	gi|18655798|pdb|1K6O|A	60	73.85	65	26	0	21	85	21	85	3e-22	84.7	16.7	1.1	83	89	58	MOLECULE: ETS-DOMAIN PROTEIN ELK-4;	NP_001964.2	NP_001964	60	73.85	65	26	0	21	85	21	85	1e-19	90.5	IPR000418; IPR011991	Y	ELK4	9606 [Organism: human] [Scientific Name: Homo sapiens]	Y	26	1BC8-C	-	-	-	-	-	-	-	-	-
1K6O	A	P28324	gi|18655798|pdb|1K6O|A	60	73.85	65	26	0	21	85	21	85	3e-22	84.7	16.7	1.1	83	89	58	MOLECULE: ETS-DOMAIN PROTEIN ELK-4;	NP_001964.2	NP_001964	60	73.85	65	26	0	21	85	21	85	1e-19	90.5	IPR000418; IPR011991	Y	ELK4	9606 [Organism: human] [Scientific Name: Homo sapiens]	Y	26	1BC8-C	-	-	-	-	-	-	-	-	-
1K6O	A	P28324	gi|18655798|pdb|1K6O|A	60	73.85	65	26	0	21	85	21	85	3e-22	84.7	16.7	1.1	83	89	58	MOLECULE: ETS-DOMAIN PROTEIN ELK-4;	NP_001964.2	NP_001964	60	73.85	65	26	0	21	85	21	85	1e-19	90.5	IPR000418; IPR011991	Y	ELK4	9606 [Organism: human] [Scientific Name: Homo sapiens]	Y	26	1BC8-C	-	-	-	-	-	-	-	-	-
1K6O	A	P28324	gi|18655798|pdb|1K6O|A	60	73.85	65	26	0	21	85	21	85	3e-22	84.7	16.7	1.1	83	89	58	MOLECULE: ETS-DOMAIN PROTEIN ELK-4;	NP_001964.2	NP_001964	60	73.85	65	26	0	21	85	21	85	1e-19	90.5	IPR000418; IPR011991	Y	ELK4	9606 [Organism: human] [Scientific Name: Homo sapiens]	Y	26	1BC8-C	-	-	-	-	-	-	-	-	-
1K6O	A	P28324	gi|18655798|pdb|1K6O|A	60	73.85	65	26	0	21	85	21	85	3e-22	84.7	16.7	1.1	83	89	58	MOLECULE: ETS-DOMAIN PROTEIN ELK-4;	NP_001964.2	NP_001964	60	73.85	65	26	0	21	85	21	85	1e-19	90.5	IPR000418; IPR011991	Y	ELK4	9606 [Organism: human] [Scientific Name: Homo sapiens]	Y	26	1BC8-C	-	-	-	-	-	-	-	-	-
1K6O	A	P28324	gi|18655798|pdb|1K6O|A	60	73.85	65	26	0	21	85	21	85	3e-22	84.7	16.7	1.1	83	89	58	MOLECULE: ETS-DOMAIN PROTEIN ELK-4;	NP_001964.2	NP_001964	60	73.85	65	26	0	21	85	21	85	1e-19	90.5	IPR000418; IPR011991	Y	ELK4	9606 [Organism: human] [Scientific Name: Homo sapiens]	Y	26	1BC8-C	-	-	-	-	-	-	-	-	-
1K6O	A	P28324	gi|18655798|pdb|1K6O|A	60	73.85	65	26	0	21	85	21	85	3e-22	84.7	16.7	1.1	83	89	58	MOLECULE: ETS-DOMAIN PROTEIN ELK-4;	NP_001964.2	NP_001964	60	73.85	65	26	0	21	85	21	85	1e-19	90.5	IPR000418; IPR011991	Y	ELK4	9606 [Organism: human] [Scientific Name: Homo sapiens]	Y	26	1BC8-C	-	-	-	-	-	-	-	-	-
1K6O	A	P28324	gi|18655798|pdb|1K6O|A	60	73.85	65	26	0	21	85	21	85	3e-22	84.7	16.7	1.1	83	89	58	MOLECULE: ETS-DOMAIN PROTEIN ELK-4;	NP_001964.2	NP_001964	60	73.85	65	26	0	21	85	21	85	1e-19	90.5	IPR000418; IPR011991	Y	ELK4	9606 [Organism: human] [Scientific Name: Homo sapiens]	Y	26	1BC8-C	-	-	-	-	-	-	-	-	-
1K6O	A	P28324	gi|18655798|pdb|1K6O|A	60	73.85	65	26	0	21	85	21	85	3e-22	84.7	16.7	1.1	83	89	58	MOLECULE: ETS-DOMAIN PROTEIN ELK-4;	NP_001964.2	NP_001964	60	73.85	65	26	0	21	85	21	85	1e-19	90.5	IPR000418; IPR011991	Y	ELK4	9606 [Organism: human] [Scientific Name: Homo sapiens]	Y	26	1BC8-C	-	-	-	-	-	-	-	-	-
1K6O	A	P28324	gi|18655798|pdb|1K6O|A	60	73.85	65	26	0	21	85	21	85	3e-22	84.7	16.7	1.1	83	89	58	MOLECULE: ETS-DOMAIN PROTEIN ELK-4;	NP_001964.2	NP_001964	60	73.85	65	26	0	21	85	21	85	1e-19	90.5	IPR000418; IPR011991	Y	ELK4	9606 [Organism: human] [Scientific Name: Homo sapiens]	Y	26	1BC8-C	-	-	-	-	-	-	-	-	-
1K6O	A	P28324	gi|18655798|pdb|1K6O|A	60	73.85	65	26	0	21	85	21	85	3e-22	84.7	16.7	1.1	83	89	58	MOLECULE: ETS-DOMAIN PROTEIN ELK-4;	NP_001964.2	NP_001964	60	73.85	65	26	0	21	85	21	85	1e-19	90.5	IPR000418; IPR011991	Y	ELK4	9606 [Organism: human] [Scientific Name: Homo sapiens]	Y	26	1BC8-C	-	-	-	-	-	-	-	-	-
1K6O	A	P28324	gi|18655798|pdb|1K6O|A	60	73.85	65	26	0	21	85	21	85	3e-22	84.7	16.7	1.1	83	89	58	MOLECULE: ETS-DOMAIN PROTEIN ELK-4;	NP_001964.2	NP_001964	60	73.85	65	26	0	21	85	21	85	1e-19	90.5	IPR000418; IPR011991	Y	ELK4	9606 [Organism: human] [Scientific Name: Homo sapiens]	Y	26	1BC8-C	-	-	-	-	-	-	-	-	-
1K6O	A	P28324	gi|18655798|pdb|1K6O|A	60	73.85	65	26	0	21	85	21	85	3e-22	84.7	16.7	1.1	83	89	58	MOLECULE: ETS-DOMAIN PROTEIN ELK-4;	NP_001964.2	NP_001964	60	73.85	65	26	0	21	85	21	85	1e-19	90.5	IPR000418; IPR011991	Y	ELK4	9606 [Organism: human] [Scientific Name: Homo sapiens]	Y	26	1BC8-C	-	-	-	-	-	-	-	-	-
1K6O	A	P28324	gi|18655798|pdb|1K6O|A	60	73.85	65	26	0	21	85	21	85	3e-22	84.7	16.7	1.1	83	89	58	MOLECULE: ETS-DOMAIN PROTEIN ELK-4;	NP_001964.2	NP_001964	60	73.85	65	26	0	21	85	21	85	1e-19	90.5	IPR000418; IPR011991	Y	ELK4	9606 [Organism: human] [Scientific Name: Homo sapiens]	Y	26	1BC8-C	-	-	-	-	-	-	-	-	-
1K6O	A	P28324	gi|18655798|pdb|1K6O|A	60	73.85	65	26	0	21	85	21	85	3e-22	84.7	16.7	1.1	83	89	58	MOLECULE: ETS-DOMAIN PROTEIN ELK-4;	NP_001964.2	NP_001964	60	73.85	65	26	0	21	85	21	85	1e-19	90.5	IPR000418; IPR011991	Y	ELK4	9606 [Organism: human] [Scientific Name: Homo sapiens]	Y	26	1BC8-C	-	-	-	-	-	-	-	-	-
1K6O	A	P28324	gi|18655798|pdb|1K6O|A	60	73.85	65	26	0	21	85	21	85	3e-22	84.7	16.7	1.1	83	89	58	MOLECULE: ETS-DOMAIN PROTEIN ELK-4;	NP_001964.2	NP_001964	60	73.85	65	26	0	21	85	21	85	1e-19	90.5	IPR000418; IPR011991	Y	ELK4	9606 [Organism: human] [Scientific Name: Homo sapiens]	Y	26	1BC8-C	-	-	-	-	-	-	-	-	-
1K6O	A	P28324	gi|18655798|pdb|1K6O|A	60	73.85	65	26	0	21	85	21	85	3e-22	84.7	16.7	1.1	83	89	58	MOLECULE: ETS-DOMAIN PROTEIN ELK-4;	NP_001964.2	NP_001964	60	73.85	65	26	0	21	85	21	85	1e-19	90.5	IPR000418; IPR011991	Y	ELK4	9606 [Organism: human] [Scientific Name: Homo sapiens]	Y	26	1BC8-C	-	-	-	-	-	-	-	-	-
1K6O	A	P28324	gi|18655798|pdb|1K6O|A	60	73.85	65	26	0	21	85	21	85	3e-22	84.7	16.7	1.1	83	89	58	MOLECULE: ETS-DOMAIN PROTEIN ELK-4;	NP_001964.2	NP_001964	60	73.85	65	26	0	21	85	21	85	1e-19	90.5	IPR000418; IPR011991	Y	ELK4	9606 [Organism: human] [Scientific Name: Homo sapiens]	Y	26	1BC8-C	-	-	-	-	-	-	-	-	-
1K6O	A	P28324	gi|18655798|pdb|1K6O|A	60	73.85	65	26	0	21	85	21	85	3e-22	84.7	16.7	1.1	83	89	58	MOLECULE: ETS-DOMAIN PROTEIN ELK-4;	NP_001964.2	NP_001964	60	73.85	65	26	0	21	85	21	85	1e-19	90.5	IPR000418; IPR011991	Y	ELK4	9606 [Organism: human] [Scientific Name: Homo sapiens]	Y	26	1BC8-C	-	-	-	-	-	-	-	-	-
1K6O	A	P28324	gi|18655798|pdb|1K6O|A	60	73.85	65	26	0	21	85	21	85	3e-22	84.7	16.7	1.1	83	89	58	MOLECULE: ETS-DOMAIN PROTEIN ELK-4;	NP_001964.2	NP_001964	60	73.85	65	26	0	21	85	21	85	1e-19	90.5	IPR000418; IPR011991	Y	ELK4	9606 [Organism: human] [Scientific Name: Homo sapiens]	Y	26	1BC8-C	-	-	-	-	-	-	-	-	-
1K6O	A	P28324	gi|18655798|pdb|1K6O|A	60	73.85	65	26	0	21	85	21	85	3e-22	84.7	16.7	1.1	83	89	58	MOLECULE: ETS-DOMAIN PROTEIN ELK-4;	NP_001964.2	NP_001964	60	73.85	65	26	0	21	85	21	85	1e-19	90.5	IPR000418; IPR011991	Y	ELK4	9606 [Organism: human] [Scientific Name: Homo sapiens]	Y	26	1BC8-C	-	-	-	-	-	-	-	-	-
1K6O	A	P28324	gi|18655798|pdb|1K6O|A	60	73.85	65	26	0	21	85	21	85	3e-22	84.7	16.7	1.1	83	89	58	MOLECULE: ETS-DOMAIN PROTEIN ELK-4;	NP_001964.2	NP_001964	60	73.85	65	26	0	21	85	21	85	1e-19	90.5	IPR000418; IPR011991	Y	ELK4	9606 [Organism: human] [Scientific Name: Homo sapiens]	Y	26	1BC8-C	-	-	-	-	-	-	-	-	-
1K6O	A	P28324	gi|18655798|pdb|1K6O|A	60	73.85	65	26	0	21	85	21	85	3e-22	84.7	16.7	1.1	83	89	58	MOLECULE: ETS-DOMAIN PROTEIN ELK-4;	NP_001964.2	NP_001964	60	73.85	65	26	0	21	85	21	85	1e-19	90.5	IPR000418; IPR011991	Y	ELK4	9606 [Organism: human] [Scientific Name: Homo sapiens]	Y	26	1BC8-C	-	-	-	-	-	-	-	-	-
1K6O	A	P28324	gi|18655798|pdb|1K6O|A	60	73.85	65	26	0	21	85	21	85	3e-22	84.7	16.7	1.1	83	89	58	MOLECULE: ETS-DOMAIN PROTEIN ELK-4;	NP_001964.2	NP_001964	60	73.85	65	26	0	21	85	21	85	1e-19	90.5	IPR000418; IPR011991	Y	ELK4	9606 [Organism: human] [Scientific Name: Homo sapiens]	Y	26	1BC8-C	-	-	-	-	-	-	-	-	-
1K6O	A	P28324	gi|18655798|pdb|1K6O|A	60	73.85	65	26	0	21	85	21	85	3e-22	84.7	16.7	1.1	83	89	58	MOLECULE: ETS-DOMAIN PROTEIN ELK-4;	NP_001964.2	NP_001964	60	73.85	65	26	0	21	85	21	85	1e-19	90.5	IPR000418; IPR011991	Y	ELK4	9606 [Organism: human] [Scientific Name: Homo sapiens]	Y	26	1BC8-C	-	-	-	-	-	-	-	-	-
1K6O	A	P28324	gi|18655798|pdb|1K6O|A	60	73.85	65	26	0	21	85	21	85	3e-22	84.7	16.7	1.1	83	89	58	MOLECULE: ETS-DOMAIN PROTEIN ELK-4;	NP_001964.2	NP_001964	60	73.85	65	26	0	21	85	21	85	1e-19	90.5	IPR000418; IPR011991	Y	ELK4	9606 [Organism: human] [Scientific Name: Homo sapiens]	Y	26	1BC8-C	-	-	-	-	-	-	-	-	-
1K6O	A	P28324	gi|18655798|pdb|1K6O|A	60	73.85	65	26	0	21	85	21	85	3e-22	84.7	16.7	1.1	83	89	58	MOLECULE: ETS-DOMAIN PROTEIN ELK-4;	NP_001964.2	NP_001964	60	73.85	65	26	0	21	85	21	85	1e-19	90.5	IPR000418; IPR011991	Y	ELK4	9606 [Organism: human] [Scientific Name: Homo sapiens]	Y	26	1BC8-C	-	-	-	-	-	-	-	-	-
1K6O	A	P28324	gi|18655798|pdb|1K6O|A	60	73.85	65	26	0	21	85	21	85	3e-22	84.7	16.7	1.1	83	89	58	MOLECULE: ETS-DOMAIN PROTEIN ELK-4;	NP_001964.2	NP_001964	60	73.85	65	26	0	21	85	21	85	1e-19	90.5	IPR000418; IPR011991	Y	ELK4	9606 [Organism: human] [Scientific Name: Homo sapiens]	Y	26	1BC8-C	-	-	-	-	-	-	-	-	-
1K6O	A	P28324	gi|18655798|pdb|1K6O|A	60	73.85	65	26	0	21	85	21	85	3e-22	84.7	16.7	1.1	83	89	58	MOLECULE: ETS-DOMAIN PROTEIN ELK-4;	NP_001964.2	NP_001964	60	73.85	65	26	0	21	85	21	85	1e-19	90.5	IPR000418; IPR011991	Y	ELK4	9606 [Organism: human] [Scientific Name: Homo sapiens]	Y	26	1BC8-C	-	-	-	-	-	-	-	-	-
1K6O	A	P28324	gi|18655798|pdb|1K6O|A	60	73.85	65	26	0	21	85	21	85	3e-22	84.7	16.7	1.1	83	89	58	MOLECULE: ETS-DOMAIN PROTEIN ELK-4;	NP_001964.2	NP_001964	60	73.85	65	26	0	21	85	21	85	1e-19	90.5	IPR000418; IPR011991	Y	ELK4	9606 [Organism: human] [Scientific Name: Homo sapiens]	Y	26	1BC8-C	-	-	-	-	-	-	-	-	-
1K6O	A	P28324	gi|18655798|pdb|1K6O|A	60	73.85	65	26	0	21	85	21	85	3e-22	84.7	16.7	1.1	83	89	58	MOLECULE: ETS-DOMAIN PROTEIN ELK-4;	NP_001964.2	NP_001964	60	73.85	65	26	0	21	85	21	85	1e-19	90.5	IPR000418; IPR011991	Y	ELK4	9606 [Organism: human] [Scientific Name: Homo sapiens]	Y	26	1BC8-C	-	-	-	-	-	-	-	-	-
1K6O	A	P28324	gi|18655798|pdb|1K6O|A	60	73.85	65	26	0	21	85	21	85	3e-22	84.7	16.7	1.1	83	89	58	MOLECULE: ETS-DOMAIN PROTEIN ELK-4;	NP_001964.2	NP_001964	60	73.85	65	26	0	21	85	21	85	1e-19	90.5	IPR000418; IPR011991	Y	ELK4	9606 [Organism: human] [Scientific Name: Homo sapiens]	Y	26	1BC8-C	-	-	-	-	-	-	-	-	-
1K6O	A	P28324	gi|18655798|pdb|1K6O|A	60	73.85	65	26	0	21	85	21	85	3e-22	84.7	16.7	1.1	83	89	58	MOLECULE: ETS-DOMAIN PROTEIN ELK-4;	NP_001964.2	NP_001964	60	73.85	65	26	0	21	85	21	85	1e-19	90.5	IPR000418; IPR011991	Y	ELK4	9606 [Organism: human] [Scientific Name: Homo sapiens]	Y	26	1BC8-C	-	-	-	-	-	-	-	-	-
1K6O	A	P28324	gi|18655798|pdb|1K6O|A	60	73.85	65	26	0	21	85	21	85	3e-22	84.7	16.7	1.1	83	89	58	MOLECULE: ETS-DOMAIN PROTEIN ELK-4;	NP_001964.2	NP_001964	60	73.85	65	26	0	21	85	21	85	1e-19	90.5	IPR000418; IPR011991	Y	ELK4	9606 [Organism: human] [Scientific Name: Homo sapiens]	Y	26	1BC8-C	-	-	-	-	-	-	-	-	-
1K6O	A	P28324	gi|18655798|pdb|1K6O|A	60	73.85	65	26	0	21	85	21	85	3e-22	84.7	16.7	1.1	83	89	58	MOLECULE: ETS-DOMAIN PROTEIN ELK-4;	NP_001964.2	NP_001964	60	73.85	65	26	0	21	85	21	85	1e-19	90.5	IPR000418; IPR011991	Y	ELK4	9606 [Organism: human] [Scientific Name: Homo sapiens]	Y	26	1BC8-C	-	-	-	-	-	-	-	-	-
1K6O	A	P28324	gi|18655798|pdb|1K6O|A	60	73.85	65	26	0	21	85	21	85	3e-22	84.7	16.7	1.1	83	89	58	MOLECULE: ETS-DOMAIN PROTEIN ELK-4;	NP_001964.2	NP_001964	60	73.85	65	26	0	21	85	21	85	1e-19	90.5	IPR000418; IPR011991	Y	ELK4	9606 [Organism: human] [Scientific Name: Homo sapiens]	Y	26	1BC8-C	-	-	-	-	-	-	-	-	-
1K6O	A	P28324	gi|18655798|pdb|1K6O|A	60	73.85	65	26	0	21	85	21	85	3e-22	84.7	16.7	1.1	83	89	58	MOLECULE: ETS-DOMAIN PROTEIN ELK-4;	NP_001964.2	NP_001964	60	73.85	65	26	0	21	85	21	85	1e-19	90.5	IPR000418; IPR011991	Y	ELK4	9606 [Organism: human] [Scientific Name: Homo sapiens]	Y	26	1BC8-C	-	-	-	-	-	-	-	-	-
1K6O	A	P28324	gi|18655798|pdb|1K6O|A	60	73.85	65	26	0	21	85	21	85	3e-22	84.7	16.7	1.1	83	89	58	MOLECULE: ETS-DOMAIN PROTEIN ELK-4;	NP_001964.2	NP_001964	60	73.85	65	26	0	21	85	21	85	1e-19	90.5	IPR000418; IPR011991	Y	ELK4	9606 [Organism: human] [Scientific Name: Homo sapiens]	Y	26	1BC8-C	-	-	-	-	-	-	-	-	-
1K6O	A	P28324	gi|18655798|pdb|1K6O|A	60	73.85	65	26	0	21	85	21	85	3e-22	84.7	16.7	1.1	83	89	58	MOLECULE: ETS-DOMAIN PROTEIN ELK-4;	NP_001964.2	NP_001964	60	73.85	65	26	0	21	85	21	85	1e-19	90.5	IPR000418; IPR011991	Y	ELK4	9606 [Organism: human] [Scientific Name: Homo sapiens]	Y	26	1BC8-C	-	-	-	-	-	-	-	-	-
1K6O	A	P28324	gi|18655798|pdb|1K6O|A	60	73.85	65	26	0	21	85	21	85	3e-22	84.7	16.7	1.1	83	89	58	MOLECULE: ETS-DOMAIN PROTEIN ELK-4;	NP_068567.1	NP_068567	60	73.85	65	26	0	21	85	21	85	9e-20	90.5	IPR000418; IPR011991	Y	ELK4	9606 [Organism: human] [Scientific Name: Homo sapiens]	Y	26	1BC8-C	-	-	-	-	-	-	-	-	-
1K6O	A	P28324	gi|18655798|pdb|1K6O|A	60	73.85	65	26	0	21	85	21	85	3e-22	84.7	16.7	1.1	83	89	58	MOLECULE: ETS-DOMAIN PROTEIN ELK-4;	NP_068567.1	NP_068567	60	73.85	65	26	0	21	85	21	85	9e-20	90.5	IPR000418; IPR011991	Y	ELK4	9606 [Organism: human] [Scientific Name: Homo sapiens]	Y	26	1BC8-C	-	-	-	-	-	-	-	-	-
1K6O	A	P28324	gi|18655798|pdb|1K6O|A	60	73.85	65	26	0	21	85	21	85	3e-22	84.7	16.7	1.1	83	89	58	MOLECULE: ETS-DOMAIN PROTEIN ELK-4;	NP_068567.1	NP_068567	60	73.85	65	26	0	21	85	21	85	9e-20	90.5	IPR000418; IPR011991	Y	ELK4	9606 [Organism: human] [Scientific Name: Homo sapiens]	Y	26	1BC8-C	-	-	-	-	-	-	-	-	-
1K6O	A	P28324	gi|18655798|pdb|1K6O|A	60	73.85	65	26	0	21	85	21	85	3e-22	84.7	16.7	1.1	83	89	58	MOLECULE: ETS-DOMAIN PROTEIN ELK-4;	NP_068567.1	NP_068567	60	73.85	65	26	0	21	85	21	85	9e-20	90.5	IPR000418; IPR011991	Y	ELK4	9606 [Organism: human] [Scientific Name: Homo sapiens]	Y	26	1BC8-C	-	-	-	-	-	-	-	-	-
1K6O	A	P28324	gi|18655798|pdb|1K6O|A	60	73.85	65	26	0	21	85	21	85	3e-22	84.7	16.7	1.1	83	89	58	MOLECULE: ETS-DOMAIN PROTEIN ELK-4;	NP_068567.1	NP_068567	60	73.85	65	26	0	21	85	21	85	9e-20	90.5	IPR000418; IPR011991	Y	ELK4	9606 [Organism: human] [Scientific Name: Homo sapiens]	Y	26	1BC8-C	-	-	-	-	-	-	-	-	-
1K6O	A	P28324	gi|18655798|pdb|1K6O|A	60	73.85	65	26	0	21	85	21	85	3e-22	84.7	16.7	1.1	83	89	58	MOLECULE: ETS-DOMAIN PROTEIN ELK-4;	NP_068567.1	NP_068567	60	73.85	65	26	0	21	85	21	85	9e-20	90.5	IPR000418; IPR011991	Y	ELK4	9606 [Organism: human] [Scientific Name: Homo sapiens]	Y	26	1BC8-C	-	-	-	-	-	-	-	-	-
1K6O	A	P28324	gi|18655798|pdb|1K6O|A	60	73.85	65	26	0	21	85	21	85	3e-22	84.7	16.7	1.1	83	89	58	MOLECULE: ETS-DOMAIN PROTEIN ELK-4;	NP_068567.1	NP_068567	60	73.85	65	26	0	21	85	21	85	9e-20	90.5	IPR000418; IPR011991	Y	ELK4	9606 [Organism: human] [Scientific Name: Homo sapiens]	Y	26	1BC8-C	-	-	-	-	-	-	-	-	-
1K6O	A	P28324	gi|18655798|pdb|1K6O|A	60	73.85	65	26	0	21	85	21	85	3e-22	84.7	16.7	1.1	83	89	58	MOLECULE: ETS-DOMAIN PROTEIN ELK-4;	NP_068567.1	NP_068567	60	73.85	65	26	0	21	85	21	85	9e-20	90.5	IPR000418; IPR011991	Y	ELK4	9606 [Organism: human] [Scientific Name: Homo sapiens]	Y	26	1BC8-C	-	-	-	-	-	-	-	-	-
1K6O	A	P28324	gi|18655798|pdb|1K6O|A	60	73.85	65	26	0	21	85	21	85	3e-22	84.7	16.7	1.1	83	89	58	MOLECULE: ETS-DOMAIN PROTEIN ELK-4;	NP_068567.1	NP_068567	60	73.85	65	26	0	21	85	21	85	9e-20	90.5	IPR000418; IPR011991	Y	ELK4	9606 [Organism: human] [Scientific Name: Homo sapiens]	Y	26	1BC8-C	-	-	-	-	-	-	-	-	-
1K6O	A	P28324	gi|18655798|pdb|1K6O|A	60	73.85	65	26	0	21	85	21	85	3e-22	84.7	16.7	1.1	83	89	58	MOLECULE: ETS-DOMAIN PROTEIN ELK-4;	NP_068567.1	NP_068567	60	73.85	65	26	0	21	85	21	85	9e-20	90.5	IPR000418; IPR011991	Y	ELK4	9606 [Organism: human] [Scientific Name: Homo sapiens]	Y	26	1BC8-C	-	-	-	-	-	-	-	-	-
1K6O	A	P28324	gi|18655798|pdb|1K6O|A	60	73.85	65	26	0	21	85	21	85	3e-22	84.7	16.7	1.1	83	89	58	MOLECULE: ETS-DOMAIN PROTEIN ELK-4;	NP_068567.1	NP_068567	60	73.85	65	26	0	21	85	21	85	9e-20	90.5	IPR000418; IPR011991	Y	ELK4	9606 [Organism: human] [Scientific Name: Homo sapiens]	Y	26	1BC8-C	-	-	-	-	-	-	-	-	-
1K6O	A	P28324	gi|18655798|pdb|1K6O|A	60	73.85	65	26	0	21	85	21	85	3e-22	84.7	16.7	1.1	83	89	58	MOLECULE: ETS-DOMAIN PROTEIN ELK-4;	NP_068567.1	NP_068567	60	73.85	65	26	0	21	85	21	85	9e-20	90.5	IPR000418; IPR011991	Y	ELK4	9606 [Organism: human] [Scientific Name: Homo sapiens]	Y	26	1BC8-C	-	-	-	-	-	-	-	-	-
1K6O	A	P28324	gi|18655798|pdb|1K6O|A	60	73.85	65	26	0	21	85	21	85	3e-22	84.7	16.7	1.1	83	89	58	MOLECULE: ETS-DOMAIN PROTEIN ELK-4;	NP_068567.1	NP_068567	60	73.85	65	26	0	21	85	21	85	9e-20	90.5	IPR000418; IPR011991	Y	ELK4	9606 [Organism: human] [Scientific Name: Homo sapiens]	Y	26	1BC8-C	-	-	-	-	-	-	-	-	-
1K6O	A	P28324	gi|18655798|pdb|1K6O|A	60	73.85	65	26	0	21	85	21	85	3e-22	84.7	16.7	1.1	83	89	58	MOLECULE: ETS-DOMAIN PROTEIN ELK-4;	NP_068567.1	NP_068567	60	73.85	65	26	0	21	85	21	85	9e-20	90.5	IPR000418; IPR011991	Y	ELK4	9606 [Organism: human] [Scientific Name: Homo sapiens]	Y	26	1BC8-C	-	-	-	-	-	-	-	-	-
1K6O	A	P28324	gi|18655798|pdb|1K6O|A	60	73.85	65	26	0	21	85	21	85	3e-22	84.7	16.7	1.1	83	89	58	MOLECULE: ETS-DOMAIN PROTEIN ELK-4;	NP_068567.1	NP_068567	60	73.85	65	26	0	21	85	21	85	9e-20	90.5	IPR000418; IPR011991	Y	ELK4	9606 [Organism: human] [Scientific Name: Homo sapiens]	Y	26	1BC8-C	-	-	-	-	-	-	-	-	-
1K6O	A	P28324	gi|18655798|pdb|1K6O|A	60	73.85	65	26	0	21	85	21	85	3e-22	84.7	16.7	1.1	83	89	58	MOLECULE: ETS-DOMAIN PROTEIN ELK-4;	NP_068567.1	NP_068567	60	73.85	65	26	0	21	85	21	85	9e-20	90.5	IPR000418; IPR011991	Y	ELK4	9606 [Organism: human] [Scientific Name: Homo sapiens]	Y	26	1BC8-C	-	-	-	-	-	-	-	-	-
1K6O	A	P28324	gi|18655798|pdb|1K6O|A	60	73.85	65	26	0	21	85	21	85	3e-22	84.7	16.7	1.1	83	89	58	MOLECULE: ETS-DOMAIN PROTEIN ELK-4;	NP_068567.1	NP_068567	60	73.85	65	26	0	21	85	21	85	9e-20	90.5	IPR000418; IPR011991	Y	ELK4	9606 [Organism: human] [Scientific Name: Homo sapiens]	Y	26	1BC8-C	-	-	-	-	-	-	-	-	-
1K6O	A	P28324	gi|18655798|pdb|1K6O|A	60	73.85	65	26	0	21	85	21	85	3e-22	84.7	16.7	1.1	83	89	58	MOLECULE: ETS-DOMAIN PROTEIN ELK-4;	NP_068567.1	NP_068567	60	73.85	65	26	0	21	85	21	85	9e-20	90.5	IPR000418; IPR011991	Y	ELK4	9606 [Organism: human] [Scientific Name: Homo sapiens]	Y	26	1BC8-C	-	-	-	-	-	-	-	-	-
1K6O	A	P28324	gi|18655798|pdb|1K6O|A	60	73.85	65	26	0	21	85	21	85	3e-22	84.7	16.7	1.1	83	89	58	MOLECULE: ETS-DOMAIN PROTEIN ELK-4;	NP_068567.1	NP_068567	60	73.85	65	26	0	21	85	21	85	9e-20	90.5	IPR000418; IPR011991	Y	ELK4	9606 [Organism: human] [Scientific Name: Homo sapiens]	Y	26	1BC8-C	-	-	-	-	-	-	-	-	-
1K6O	A	P28324	gi|18655798|pdb|1K6O|A	60	73.85	65	26	0	21	85	21	85	3e-22	84.7	16.7	1.1	83	89	58	MOLECULE: ETS-DOMAIN PROTEIN ELK-4;	NP_068567.1	NP_068567	60	73.85	65	26	0	21	85	21	85	9e-20	90.5	IPR000418; IPR011991	Y	ELK4	9606 [Organism: human] [Scientific Name: Homo sapiens]	Y	26	1BC8-C	-	-	-	-	-	-	-	-	-
1K6O	A	P28324	gi|18655798|pdb|1K6O|A	60	73.85	65	26	0	21	85	21	85	3e-22	84.7	16.7	1.1	83	89	58	MOLECULE: ETS-DOMAIN PROTEIN ELK-4;	NP_068567.1	NP_068567	60	73.85	65	26	0	21	85	21	85	9e-20	90.5	IPR000418; IPR011991	Y	ELK4	9606 [Organism: human] [Scientific Name: Homo sapiens]	Y	26	1BC8-C	-	-	-	-	-	-	-	-	-
1K6O	A	P28324	gi|18655798|pdb|1K6O|A	60	73.85	65	26	0	21	85	21	85	3e-22	84.7	16.7	1.1	83	89	58	MOLECULE: ETS-DOMAIN PROTEIN ELK-4;	NP_068567.1	NP_068567	60	73.85	65	26	0	21	85	21	85	9e-20	90.5	IPR000418; IPR011991	Y	ELK4	9606 [Organism: human] [Scientific Name: Homo sapiens]	Y	26	1BC8-C	-	-	-	-	-	-	-	-	-
1K6O	A	P28324	gi|18655798|pdb|1K6O|A	60	73.85	65	26	0	21	85	21	85	3e-22	84.7	16.7	1.1	83	89	58	MOLECULE: ETS-DOMAIN PROTEIN ELK-4;	NP_068567.1	NP_068567	60	73.85	65	26	0	21	85	21	85	9e-20	90.5	IPR000418; IPR011991	Y	ELK4	9606 [Organism: human] [Scientific Name: Homo sapiens]	Y	26	1BC8-C	-	-	-	-	-	-	-	-	-
1K6O	A	P28324	gi|18655798|pdb|1K6O|A	60	73.85	65	26	0	21	85	21	85	3e-22	84.7	16.7	1.1	83	89	58	MOLECULE: ETS-DOMAIN PROTEIN ELK-4;	NP_068567.1	NP_068567	60	73.85	65	26	0	21	85	21	85	9e-20	90.5	IPR000418; IPR011991	Y	ELK4	9606 [Organism: human] [Scientific Name: Homo sapiens]	Y	26	1BC8-C	-	-	-	-	-	-	-	-	-
1K6O	A	P28324	gi|18655798|pdb|1K6O|A	60	73.85	65	26	0	21	85	21	85	3e-22	84.7	16.7	1.1	83	89	58	MOLECULE: ETS-DOMAIN PROTEIN ELK-4;	NP_068567.1	NP_068567	60	73.85	65	26	0	21	85	21	85	9e-20	90.5	IPR000418; IPR011991	Y	ELK4	9606 [Organism: human] [Scientific Name: Homo sapiens]	Y	26	1BC8-C	-	-	-	-	-	-	-	-	-
1K6O	A	P28324	gi|18655798|pdb|1K6O|A	60	73.85	65	26	0	21	85	21	85	3e-22	84.7	16.7	1.1	83	89	58	MOLECULE: ETS-DOMAIN PROTEIN ELK-4;	NP_068567.1	NP_068567	60	73.85	65	26	0	21	85	21	85	9e-20	90.5	IPR000418; IPR011991	Y	ELK4	9606 [Organism: human] [Scientific Name: Homo sapiens]	Y	26	1BC8-C	-	-	-	-	-	-	-	-	-
1K6O	A	P28324	gi|18655798|pdb|1K6O|A	60	73.85	65	26	0	21	85	21	85	3e-22	84.7	16.7	1.1	83	89	58	MOLECULE: ETS-DOMAIN PROTEIN ELK-4;	NP_068567.1	NP_068567	60	73.85	65	26	0	21	85	21	85	9e-20	90.5	IPR000418; IPR011991	Y	ELK4	9606 [Organism: human] [Scientific Name: Homo sapiens]	Y	26	1BC8-C	-	-	-	-	-	-	-	-	-
1K6O	A	P28324	gi|18655798|pdb|1K6O|A	60	73.85	65	26	0	21	85	21	85	3e-22	84.7	16.7	1.1	83	89	58	MOLECULE: ETS-DOMAIN PROTEIN ELK-4;	NP_068567.1	NP_068567	60	73.85	65	26	0	21	85	21	85	9e-20	90.5	IPR000418; IPR011991	Y	ELK4	9606 [Organism: human] [Scientific Name: Homo sapiens]	Y	26	1BC8-C	-	-	-	-	-	-	-	-	-
1K6O	A	P28324	gi|18655798|pdb|1K6O|A	60	73.85	65	26	0	21	85	21	85	3e-22	84.7	16.7	1.1	83	89	58	MOLECULE: ETS-DOMAIN PROTEIN ELK-4;	NP_068567.1	NP_068567	60	73.85	65	26	0	21	85	21	85	9e-20	90.5	IPR000418; IPR011991	Y	ELK4	9606 [Organism: human] [Scientific Name: Homo sapiens]	Y	26	1BC8-C	-	-	-	-	-	-	-	-	-
1K6O	A	P28324	gi|18655798|pdb|1K6O|A	60	73.85	65	26	0	21	85	21	85	3e-22	84.7	16.7	1.1	83	89	58	MOLECULE: ETS-DOMAIN PROTEIN ELK-4;	NP_068567.1	NP_068567	60	73.85	65	26	0	21	85	21	85	9e-20	90.5	IPR000418; IPR011991	Y	ELK4	9606 [Organism: human] [Scientific Name: Homo sapiens]	Y	26	1BC8-C	-	-	-	-	-	-	-	-	-
1K6O	A	P28324	gi|18655798|pdb|1K6O|A	60	73.85	65	26	0	21	85	21	85	3e-22	84.7	16.7	1.1	83	89	58	MOLECULE: ETS-DOMAIN PROTEIN ELK-4;	NP_068567.1	NP_068567	60	73.85	65	26	0	21	85	21	85	9e-20	90.5	IPR000418; IPR011991	Y	ELK4	9606 [Organism: human] [Scientific Name: Homo sapiens]	Y	26	1BC8-C	-	-	-	-	-	-	-	-	-
1K6O	A	P28324	gi|18655798|pdb|1K6O|A	60	73.85	65	26	0	21	85	21	85	3e-22	84.7	16.7	1.1	83	89	58	MOLECULE: ETS-DOMAIN PROTEIN ELK-4;	NP_068567.1	NP_068567	60	73.85	65	26	0	21	85	21	85	9e-20	90.5	IPR000418; IPR011991	Y	ELK4	9606 [Organism: human] [Scientific Name: Homo sapiens]	Y	26	1BC8-C	-	-	-	-	-	-	-	-	-
1K6O	A	P28324	gi|18655798|pdb|1K6O|A	60	73.85	65	26	0	21	85	21	85	3e-22	84.7	16.7	1.1	83	89	58	MOLECULE: ETS-DOMAIN PROTEIN ELK-4;	NP_068567.1	NP_068567	60	73.85	65	26	0	21	85	21	85	9e-20	90.5	IPR000418; IPR011991	Y	ELK4	9606 [Organism: human] [Scientific Name: Homo sapiens]	Y	26	1BC8-C	-	-	-	-	-	-	-	-	-
1K6O	A	P28324	gi|18655798|pdb|1K6O|A	60	73.85	65	26	0	21	85	21	85	3e-22	84.7	16.7	1.1	83	89	58	MOLECULE: ETS-DOMAIN PROTEIN ELK-4;	NP_068567.1	NP_068567	60	73.85	65	26	0	21	85	21	85	9e-20	90.5	IPR000418; IPR011991	Y	ELK4	9606 [Organism: human] [Scientific Name: Homo sapiens]	Y	26	1BC8-C	-	-	-	-	-	-	-	-	-
1K6O	A	P28324	gi|18655798|pdb|1K6O|A	60	73.85	65	26	0	21	85	21	85	3e-22	84.7	16.7	1.1	83	89	58	MOLECULE: ETS-DOMAIN PROTEIN ELK-4;	NP_068567.1	NP_068567	60	73.85	65	26	0	21	85	21	85	9e-20	90.5	IPR000418; IPR011991	Y	ELK4	9606 [Organism: human] [Scientific Name: Homo sapiens]	Y	26	1BC8-C	-	-	-	-	-	-	-	-	-
1K6O	A	P28324	gi|18655798|pdb|1K6O|A	60	73.85	65	26	0	21	85	21	85	3e-22	84.7	16.7	1.1	83	89	58	MOLECULE: ETS-DOMAIN PROTEIN ELK-4;	NP_068567.1	NP_068567	60	73.85	65	26	0	21	85	21	85	9e-20	90.5	IPR000418; IPR011991	Y	ELK4	9606 [Organism: human] [Scientific Name: Homo sapiens]	Y	26	1BC8-C	-	-	-	-	-	-	-	-	-
1K6O	A	P28324	gi|18655798|pdb|1K6O|A	60	73.85	65	26	0	21	85	21	85	3e-22	84.7	16.7	1.1	83	89	58	MOLECULE: ETS-DOMAIN PROTEIN ELK-4;	NP_068567.1	NP_068567	60	73.85	65	26	0	21	85	21	85	9e-20	90.5	IPR000418; IPR011991	Y	ELK4	9606 [Organism: human] [Scientific Name: Homo sapiens]	Y	26	1BC8-C	-	-	-	-	-	-	-	-	-
1K6O	A	P28324	gi|18655798|pdb|1K6O|A	60	73.85	65	26	0	21	85	21	85	3e-22	84.7	16.7	1.1	83	89	58	MOLECULE: ETS-DOMAIN PROTEIN ELK-4;	NP_068567.1	NP_068567	60	73.85	65	26	0	21	85	21	85	9e-20	90.5	IPR000418; IPR011991	Y	ELK4	9606 [Organism: human] [Scientific Name: Homo sapiens]	Y	26	1BC8-C	-	-	-	-	-	-	-	-	-
1K6O	A	P28324	gi|18655798|pdb|1K6O|A	60	73.85	65	26	0	21	85	21	85	3e-22	84.7	16.7	1.1	83	89	58	MOLECULE: ETS-DOMAIN PROTEIN ELK-4;	NP_068567.1	NP_068567	60	73.85	65	26	0	21	85	21	85	9e-20	90.5	IPR000418; IPR011991	Y	ELK4	9606 [Organism: human] [Scientific Name: Homo sapiens]	Y	26	1BC8-C	-	-	-	-	-	-	-	-	-
1K6O	A	P28324	gi|18655798|pdb|1K6O|A	60	73.85	65	26	0	21	85	21	85	3e-22	84.7	16.7	1.1	83	89	58	MOLECULE: ETS-DOMAIN PROTEIN ELK-4;	NP_068567.1	NP_068567	60	73.85	65	26	0	21	85	21	85	9e-20	90.5	IPR000418; IPR011991	Y	ELK4	9606 [Organism: human] [Scientific Name: Homo sapiens]	Y	26	1BC8-C	-	-	-	-	-	-	-	-	-
1K6O	A	P28324	gi|18655798|pdb|1K6O|A	60	73.85	65	26	0	21	85	21	85	3e-22	84.7	16.7	1.1	83	89	58	MOLECULE: ETS-DOMAIN PROTEIN ELK-4;	NP_068567.1	NP_068567	60	73.85	65	26	0	21	85	21	85	9e-20	90.5	IPR000418; IPR011991	Y	ELK4	9606 [Organism: human] [Scientific Name: Homo sapiens]	Y	26	1BC8-C	-	-	-	-	-	-	-	-	-
1K6O	A	P28324	gi|18655798|pdb|1K6O|A	60	73.85	65	26	0	21	85	21	85	3e-22	84.7	16.7	1.1	83	89	58	MOLECULE: ETS-DOMAIN PROTEIN ELK-4;	NP_068567.1	NP_068567	60	73.85	65	26	0	21	85	21	85	9e-20	90.5	IPR000418; IPR011991	Y	ELK4	9606 [Organism: human] [Scientific Name: Homo sapiens]	Y	26	1BC8-C	-	-	-	-	-	-	-	-	-
1K6O	A	P28324	gi|18655798|pdb|1K6O|A	60	73.85	65	26	0	21	85	21	85	3e-22	84.7	16.7	1.1	83	89	58	MOLECULE: ETS-DOMAIN PROTEIN ELK-4;	NP_068567.1	NP_068567	60	73.85	65	26	0	21	85	21	85	9e-20	90.5	IPR000418; IPR011991	Y	ELK4	9606 [Organism: human] [Scientific Name: Homo sapiens]	Y	26	1BC8-C	-	-	-	-	-	-	-	-	-
1K6O	A	P28324	gi|18655798|pdb|1K6O|A	60	73.85	65	26	0	21	85	21	85	3e-22	84.7	16.7	1.1	83	89	58	MOLECULE: ETS-DOMAIN PROTEIN ELK-4;	NP_068567.1	NP_068567	60	73.85	65	26	0	21	85	21	85	9e-20	90.5	IPR000418; IPR011991	Y	ELK4	9606 [Organism: human] [Scientific Name: Homo sapiens]	Y	26	1BC8-C	-	-	-	-	-	-	-	-	-
1K6O	A	P28324	gi|18655798|pdb|1K6O|A	60	73.85	65	26	0	21	85	21	85	3e-22	84.7	16.7	1.1	83	89	58	MOLECULE: ETS-DOMAIN PROTEIN ELK-4;	NP_068567.1	NP_068567	60	73.85	65	26	0	21	85	21	85	9e-20	90.5	IPR000418; IPR011991	Y	ELK4	9606 [Organism: human] [Scientific Name: Homo sapiens]	Y	26	1BC8-C	-	-	-	-	-	-	-	-	-
1K6O	A	P28324	gi|18655798|pdb|1K6O|A	60	73.85	65	26	0	21	85	21	85	3e-22	84.7	16.7	1.1	83	89	58	MOLECULE: ETS-DOMAIN PROTEIN ELK-4;	NP_068567.1	NP_068567	60	73.85	65	26	0	21	85	21	85	9e-20	90.5	IPR000418; IPR011991	Y	ELK4	9606 [Organism: human] [Scientific Name: Homo sapiens]	Y	26	1BC8-C	-	-	-	-	-	-	-	-	-
1K6O	A	P28324	gi|18655798|pdb|1K6O|A	60	73.85	65	26	0	21	85	21	85	3e-22	84.7	16.7	1.1	83	89	58	MOLECULE: ETS-DOMAIN PROTEIN ELK-4;	NP_068567.1	NP_068567	60	73.85	65	26	0	21	85	21	85	9e-20	90.5	IPR000418; IPR011991	Y	ELK4	9606 [Organism: human] [Scientific Name: Homo sapiens]	Y	26	1BC8-C	-	-	-	-	-	-	-	-	-
1K6O	A	P28324	gi|18655798|pdb|1K6O|A	60	73.85	65	26	0	21	85	21	85	3e-22	84.7	16.7	1.1	83	89	58	MOLECULE: ETS-DOMAIN PROTEIN ELK-4;	NP_068567.1	NP_068567	60	73.85	65	26	0	21	85	21	85	9e-20	90.5	IPR000418; IPR011991	Y	ELK4	9606 [Organism: human] [Scientific Name: Homo sapiens]	Y	26	1BC8-C	-	-	-	-	-	-	-	-	-
1K6O	A	P28324	gi|18655798|pdb|1K6O|A	60	73.85	65	26	0	21	85	21	85	3e-22	84.7	16.7	1.1	83	89	58	MOLECULE: ETS-DOMAIN PROTEIN ELK-4;	NP_068567.1	NP_068567	60	73.85	65	26	0	21	85	21	85	9e-20	90.5	IPR000418; IPR011991	Y	ELK4	9606 [Organism: human] [Scientific Name: Homo sapiens]	Y	26	1BC8-C	-	-	-	-	-	-	-	-	-
1HBX	H	P28324	gi|14719553|pdb|1HBX|H	61.9	74.6	63	24	0	23	85	24	86	2e-21	84.7	15.4	1.1	83	109	58	MOLECULE: SERUM RESPONSE FACTOR;	NP_001964.2	NP_001964	60	73.85	65	26	0	21	85	21	85	1e-19	90.5	IPR000418; IPR011991	Y	ELK4	9606 [Organism: human] [Scientific Name: Homo sapiens]	Y	26	1BC8-C	-	-	-	-	-	-	-	-	-
1HBX	H	P28324	gi|14719553|pdb|1HBX|H	61.9	74.6	63	24	0	23	85	24	86	2e-21	84.7	15.4	1.1	83	109	58	MOLECULE: SERUM RESPONSE FACTOR;	NP_001964.2	NP_001964	60	73.85	65	26	0	21	85	21	85	1e-19	90.5	IPR000418; IPR011991	Y	ELK4	9606 [Organism: human] [Scientific Name: Homo sapiens]	Y	26	1BC8-C	-	-	-	-	-	-	-	-	-
1HBX	H	P28324	gi|14719553|pdb|1HBX|H	61.9	74.6	63	24	0	23	85	24	86	2e-21	84.7	15.4	1.1	83	109	58	MOLECULE: SERUM RESPONSE FACTOR;	NP_001964.2	NP_001964	60	73.85	65	26	0	21	85	21	85	1e-19	90.5	IPR000418; IPR011991	Y	ELK4	9606 [Organism: human] [Scientific Name: Homo sapiens]	Y	26	1BC8-C	-	-	-	-	-	-	-	-	-
1HBX	H	P28324	gi|14719553|pdb|1HBX|H	61.9	74.6	63	24	0	23	85	24	86	2e-21	84.7	15.4	1.1	83	109	58	MOLECULE: SERUM RESPONSE FACTOR;	NP_001964.2	NP_001964	60	73.85	65	26	0	21	85	21	85	1e-19	90.5	IPR000418; IPR011991	Y	ELK4	9606 [Organism: human] [Scientific Name: Homo sapiens]	Y	26	1BC8-C	-	-	-	-	-	-	-	-	-
1HBX	H	P28324	gi|14719553|pdb|1HBX|H	61.9	74.6	63	24	0	23	85	24	86	2e-21	84.7	15.4	1.1	83	109	58	MOLECULE: SERUM RESPONSE FACTOR;	NP_001964.2	NP_001964	60	73.85	65	26	0	21	85	21	85	1e-19	90.5	IPR000418; IPR011991	Y	ELK4	9606 [Organism: human] [Scientific Name: Homo sapiens]	Y	26	1BC8-C	-	-	-	-	-	-	-	-	-
1HBX	H	P28324	gi|14719553|pdb|1HBX|H	61.9	74.6	63	24	0	23	85	24	86	2e-21	84.7	15.4	1.1	83	109	58	MOLECULE: SERUM RESPONSE FACTOR;	NP_001964.2	NP_001964	60	73.85	65	26	0	21	85	21	85	1e-19	90.5	IPR000418; IPR011991	Y	ELK4	9606 [Organism: human] [Scientific Name: Homo sapiens]	Y	26	1BC8-C	-	-	-	-	-	-	-	-	-
1HBX	H	P28324	gi|14719553|pdb|1HBX|H	61.9	74.6	63	24	0	23	85	24	86	2e-21	84.7	15.4	1.1	83	109	58	MOLECULE: SERUM RESPONSE FACTOR;	NP_001964.2	NP_001964	60	73.85	65	26	0	21	85	21	85	1e-19	90.5	IPR000418; IPR011991	Y	ELK4	9606 [Organism: human] [Scientific Name: Homo sapiens]	Y	26	1BC8-C	-	-	-	-	-	-	-	-	-
1HBX	H	P28324	gi|14719553|pdb|1HBX|H	61.9	74.6	63	24	0	23	85	24	86	2e-21	84.7	15.4	1.1	83	109	58	MOLECULE: SERUM RESPONSE FACTOR;	NP_001964.2	NP_001964	60	73.85	65	26	0	21	85	21	85	1e-19	90.5	IPR000418; IPR011991	Y	ELK4	9606 [Organism: human] [Scientific Name: Homo sapiens]	Y	26	1BC8-C	-	-	-	-	-	-	-	-	-
1HBX	H	P28324	gi|14719553|pdb|1HBX|H	61.9	74.6	63	24	0	23	85	24	86	2e-21	84.7	15.4	1.1	83	109	58	MOLECULE: SERUM RESPONSE FACTOR;	NP_001964.2	NP_001964	60	73.85	65	26	0	21	85	21	85	1e-19	90.5	IPR000418; IPR011991	Y	ELK4	9606 [Organism: human] [Scientific Name: Homo sapiens]	Y	26	1BC8-C	-	-	-	-	-	-	-	-	-
1HBX	H	P28324	gi|14719553|pdb|1HBX|H	61.9	74.6	63	24	0	23	85	24	86	2e-21	84.7	15.4	1.1	83	109	58	MOLECULE: SERUM RESPONSE FACTOR;	NP_001964.2	NP_001964	60	73.85	65	26	0	21	85	21	85	1e-19	90.5	IPR000418; IPR011991	Y	ELK4	9606 [Organism: human] [Scientific Name: Homo sapiens]	Y	26	1BC8-C	-	-	-	-	-	-	-	-	-
1HBX	H	P28324	gi|14719553|pdb|1HBX|H	61.9	74.6	63	24	0	23	85	24	86	2e-21	84.7	15.4	1.1	83	109	58	MOLECULE: SERUM RESPONSE FACTOR;	NP_001964.2	NP_001964	60	73.85	65	26	0	21	85	21	85	1e-19	90.5	IPR000418; IPR011991	Y	ELK4	9606 [Organism: human] [Scientific Name: Homo sapiens]	Y	26	1BC8-C	-	-	-	-	-	-	-	-	-
1HBX	H	P28324	gi|14719553|pdb|1HBX|H	61.9	74.6	63	24	0	23	85	24	86	2e-21	84.7	15.4	1.1	83	109	58	MOLECULE: SERUM RESPONSE FACTOR;	NP_001964.2	NP_001964	60	73.85	65	26	0	21	85	21	85	1e-19	90.5	IPR000418; IPR011991	Y	ELK4	9606 [Organism: human] [Scientific Name: Homo sapiens]	Y	26	1BC8-C	-	-	-	-	-	-	-	-	-
1HBX	H	P28324	gi|14719553|pdb|1HBX|H	61.9	74.6	63	24	0	23	85	24	86	2e-21	84.7	15.4	1.1	83	109	58	MOLECULE: SERUM RESPONSE FACTOR;	NP_001964.2	NP_001964	60	73.85	65	26	0	21	85	21	85	1e-19	90.5	IPR000418; IPR011991	Y	ELK4	9606 [Organism: human] [Scientific Name: Homo sapiens]	Y	26	1BC8-C	-	-	-	-	-	-	-	-	-
1HBX	H	P28324	gi|14719553|pdb|1HBX|H	61.9	74.6	63	24	0	23	85	24	86	2e-21	84.7	15.4	1.1	83	109	58	MOLECULE: SERUM RESPONSE FACTOR;	NP_001964.2	NP_001964	60	73.85	65	26	0	21	85	21	85	1e-19	90.5	IPR000418; IPR011991	Y	ELK4	9606 [Organism: human] [Scientific Name: Homo sapiens]	Y	26	1BC8-C	-	-	-	-	-	-	-	-	-
1HBX	H	P28324	gi|14719553|pdb|1HBX|H	61.9	74.6	63	24	0	23	85	24	86	2e-21	84.7	15.4	1.1	83	109	58	MOLECULE: SERUM RESPONSE FACTOR;	NP_001964.2	NP_001964	60	73.85	65	26	0	21	85	21	85	1e-19	90.5	IPR000418; IPR011991	Y	ELK4	9606 [Organism: human] [Scientific Name: Homo sapiens]	Y	26	1BC8-C	-	-	-	-	-	-	-	-	-
1HBX	H	P28324	gi|14719553|pdb|1HBX|H	61.9	74.6	63	24	0	23	85	24	86	2e-21	84.7	15.4	1.1	83	109	58	MOLECULE: SERUM RESPONSE FACTOR;	NP_001964.2	NP_001964	60	73.85	65	26	0	21	85	21	85	1e-19	90.5	IPR000418; IPR011991	Y	ELK4	9606 [Organism: human] [Scientific Name: Homo sapiens]	Y	26	1BC8-C	-	-	-	-	-	-	-	-	-
1HBX	H	P28324	gi|14719553|pdb|1HBX|H	61.9	74.6	63	24	0	23	85	24	86	2e-21	84.7	15.4	1.1	83	109	58	MOLECULE: SERUM RESPONSE FACTOR;	NP_001964.2	NP_001964	60	73.85	65	26	0	21	85	21	85	1e-19	90.5	IPR000418; IPR011991	Y	ELK4	9606 [Organism: human] [Scientific Name: Homo sapiens]	Y	26	1BC8-C	-	-	-	-	-	-	-	-	-
1HBX	H	P28324	gi|14719553|pdb|1HBX|H	61.9	74.6	63	24	0	23	85	24	86	2e-21	84.7	15.4	1.1	83	109	58	MOLECULE: SERUM RESPONSE FACTOR;	NP_001964.2	NP_001964	60	73.85	65	26	0	21	85	21	85	1e-19	90.5	IPR000418; IPR011991	Y	ELK4	9606 [Organism: human] [Scientific Name: Homo sapiens]	Y	26	1BC8-C	-	-	-	-	-	-	-	-	-
1HBX	H	P28324	gi|14719553|pdb|1HBX|H	61.9	74.6	63	24	0	23	85	24	86	2e-21	84.7	15.4	1.1	83	109	58	MOLECULE: SERUM RESPONSE FACTOR;	NP_001964.2	NP_001964	60	73.85	65	26	0	21	85	21	85	1e-19	90.5	IPR000418; IPR011991	Y	ELK4	9606 [Organism: human] [Scientific Name: Homo sapiens]	Y	26	1BC8-C	-	-	-	-	-	-	-	-	-
1HBX	H	P28324	gi|14719553|pdb|1HBX|H	61.9	74.6	63	24	0	23	85	24	86	2e-21	84.7	15.4	1.1	83	109	58	MOLECULE: SERUM RESPONSE FACTOR;	NP_001964.2	NP_001964	60	73.85	65	26	0	21	85	21	85	1e-19	90.5	IPR000418; IPR011991	Y	ELK4	9606 [Organism: human] [Scientific Name: Homo sapiens]	Y	26	1BC8-C	-	-	-	-	-	-	-	-	-
1HBX	H	P28324	gi|14719553|pdb|1HBX|H	61.9	74.6	63	24	0	23	85	24	86	2e-21	84.7	15.4	1.1	83	109	58	MOLECULE: SERUM RESPONSE FACTOR;	NP_001964.2	NP_001964	60	73.85	65	26	0	21	85	21	85	1e-19	90.5	IPR000418; IPR011991	Y	ELK4	9606 [Organism: human] [Scientific Name: Homo sapiens]	Y	26	1BC8-C	-	-	-	-	-	-	-	-	-
1HBX	H	P28324	gi|14719553|pdb|1HBX|H	61.9	74.6	63	24	0	23	85	24	86	2e-21	84.7	15.4	1.1	83	109	58	MOLECULE: SERUM RESPONSE FACTOR;	NP_001964.2	NP_001964	60	73.85	65	26	0	21	85	21	85	1e-19	90.5	IPR000418; IPR011991	Y	ELK4	9606 [Organism: human] [Scientific Name: Homo sapiens]	Y	26	1BC8-C	-	-	-	-	-	-	-	-	-
1HBX	H	P28324	gi|14719553|pdb|1HBX|H	61.9	74.6	63	24	0	23	85	24	86	2e-21	84.7	15.4	1.1	83	109	58	MOLECULE: SERUM RESPONSE FACTOR;	NP_001964.2	NP_001964	60	73.85	65	26	0	21	85	21	85	1e-19	90.5	IPR000418; IPR011991	Y	ELK4	9606 [Organism: human] [Scientific Name: Homo sapiens]	Y	26	1BC8-C	-	-	-	-	-	-	-	-	-
1HBX	H	P28324	gi|14719553|pdb|1HBX|H	61.9	74.6	63	24	0	23	85	24	86	2e-21	84.7	15.4	1.1	83	109	58	MOLECULE: SERUM RESPONSE FACTOR;	NP_001964.2	NP_001964	60	73.85	65	26	0	21	85	21	85	1e-19	90.5	IPR000418; IPR011991	Y	ELK4	9606 [Organism: human] [Scientific Name: Homo sapiens]	Y	26	1BC8-C	-	-	-	-	-	-	-	-	-
1HBX	H	P28324	gi|14719553|pdb|1HBX|H	61.9	74.6	63	24	0	23	85	24	86	2e-21	84.7	15.4	1.1	83	109	58	MOLECULE: SERUM RESPONSE FACTOR;	NP_001964.2	NP_001964	60	73.85	65	26	0	21	85	21	85	1e-19	90.5	IPR000418; IPR011991	Y	ELK4	9606 [Organism: human] [Scientific Name: Homo sapiens]	Y	26	1BC8-C	-	-	-	-	-	-	-	-	-
1HBX	H	P28324	gi|14719553|pdb|1HBX|H	61.9	74.6	63	24	0	23	85	24	86	2e-21	84.7	15.4	1.1	83	109	58	MOLECULE: SERUM RESPONSE FACTOR;	NP_001964.2	NP_001964	60	73.85	65	26	0	21	85	21	85	1e-19	90.5	IPR000418; IPR011991	Y	ELK4	9606 [Organism: human] [Scientific Name: Homo sapiens]	Y	26	1BC8-C	-	-	-	-	-	-	-	-	-
1HBX	H	P28324	gi|14719553|pdb|1HBX|H	61.9	74.6	63	24	0	23	85	24	86	2e-21	84.7	15.4	1.1	83	109	58	MOLECULE: SERUM RESPONSE FACTOR;	NP_001964.2	NP_001964	60	73.85	65	26	0	21	85	21	85	1e-19	90.5	IPR000418; IPR011991	Y	ELK4	9606 [Organism: human] [Scientific Name: Homo sapiens]	Y	26	1BC8-C	-	-	-	-	-	-	-	-	-
1HBX	H	P28324	gi|14719553|pdb|1HBX|H	61.9	74.6	63	24	0	23	85	24	86	2e-21	84.7	15.4	1.1	83	109	58	MOLECULE: SERUM RESPONSE FACTOR;	NP_001964.2	NP_001964	60	73.85	65	26	0	21	85	21	85	1e-19	90.5	IPR000418; IPR011991	Y	ELK4	9606 [Organism: human] [Scientific Name: Homo sapiens]	Y	26	1BC8-C	-	-	-	-	-	-	-	-	-
1HBX	H	P28324	gi|14719553|pdb|1HBX|H	61.9	74.6	63	24	0	23	85	24	86	2e-21	84.7	15.4	1.1	83	109	58	MOLECULE: SERUM RESPONSE FACTOR;	NP_001964.2	NP_001964	60	73.85	65	26	0	21	85	21	85	1e-19	90.5	IPR000418; IPR011991	Y	ELK4	9606 [Organism: human] [Scientific Name: Homo sapiens]	Y	26	1BC8-C	-	-	-	-	-	-	-	-	-
1HBX	H	P28324	gi|14719553|pdb|1HBX|H	61.9	74.6	63	24	0	23	85	24	86	2e-21	84.7	15.4	1.1	83	109	58	MOLECULE: SERUM RESPONSE FACTOR;	NP_001964.2	NP_001964	60	73.85	65	26	0	21	85	21	85	1e-19	90.5	IPR000418; IPR011991	Y	ELK4	9606 [Organism: human] [Scientific Name: Homo sapiens]	Y	26	1BC8-C	-	-	-	-	-	-	-	-	-
1HBX	H	P28324	gi|14719553|pdb|1HBX|H	61.9	74.6	63	24	0	23	85	24	86	2e-21	84.7	15.4	1.1	83	109	58	MOLECULE: SERUM RESPONSE FACTOR;	NP_001964.2	NP_001964	60	73.85	65	26	0	21	85	21	85	1e-19	90.5	IPR000418; IPR011991	Y	ELK4	9606 [Organism: human] [Scientific Name: Homo sapiens]	Y	26	1BC8-C	-	-	-	-	-	-	-	-	-
1HBX	H	P28324	gi|14719553|pdb|1HBX|H	61.9	74.6	63	24	0	23	85	24	86	2e-21	84.7	15.4	1.1	83	109	58	MOLECULE: SERUM RESPONSE FACTOR;	NP_001964.2	NP_001964	60	73.85	65	26	0	21	85	21	85	1e-19	90.5	IPR000418; IPR011991	Y	ELK4	9606 [Organism: human] [Scientific Name: Homo sapiens]	Y	26	1BC8-C	-	-	-	-	-	-	-	-	-
1HBX	H	P28324	gi|14719553|pdb|1HBX|H	61.9	74.6	63	24	0	23	85	24	86	2e-21	84.7	15.4	1.1	83	109	58	MOLECULE: SERUM RESPONSE FACTOR;	NP_001964.2	NP_001964	60	73.85	65	26	0	21	85	21	85	1e-19	90.5	IPR000418; IPR011991	Y	ELK4	9606 [Organism: human] [Scientific Name: Homo sapiens]	Y	26	1BC8-C	-	-	-	-	-	-	-	-	-
1HBX	H	P28324	gi|14719553|pdb|1HBX|H	61.9	74.6	63	24	0	23	85	24	86	2e-21	84.7	15.4	1.1	83	109	58	MOLECULE: SERUM RESPONSE FACTOR;	NP_001964.2	NP_001964	60	73.85	65	26	0	21	85	21	85	1e-19	90.5	IPR000418; IPR011991	Y	ELK4	9606 [Organism: human] [Scientific Name: Homo sapiens]	Y	26	1BC8-C	-	-	-	-	-	-	-	-	-
1HBX	H	P28324	gi|14719553|pdb|1HBX|H	61.9	74.6	63	24	0	23	85	24	86	2e-21	84.7	15.4	1.1	83	109	58	MOLECULE: SERUM RESPONSE FACTOR;	NP_001964.2	NP_001964	60	73.85	65	26	0	21	85	21	85	1e-19	90.5	IPR000418; IPR011991	Y	ELK4	9606 [Organism: human] [Scientific Name: Homo sapiens]	Y	26	1BC8-C	-	-	-	-	-	-	-	-	-
1HBX	H	P28324	gi|14719553|pdb|1HBX|H	61.9	74.6	63	24	0	23	85	24	86	2e-21	84.7	15.4	1.1	83	109	58	MOLECULE: SERUM RESPONSE FACTOR;	NP_001964.2	NP_001964	60	73.85	65	26	0	21	85	21	85	1e-19	90.5	IPR000418; IPR011991	Y	ELK4	9606 [Organism: human] [Scientific Name: Homo sapiens]	Y	26	1BC8-C	-	-	-	-	-	-	-	-	-
1HBX	H	P28324	gi|14719553|pdb|1HBX|H	61.9	74.6	63	24	0	23	85	24	86	2e-21	84.7	15.4	1.1	83	109	58	MOLECULE: SERUM RESPONSE FACTOR;	NP_001964.2	NP_001964	60	73.85	65	26	0	21	85	21	85	1e-19	90.5	IPR000418; IPR011991	Y	ELK4	9606 [Organism: human] [Scientific Name: Homo sapiens]	Y	26	1BC8-C	-	-	-	-	-	-	-	-	-
1HBX	H	P28324	gi|14719553|pdb|1HBX|H	61.9	74.6	63	24	0	23	85	24	86	2e-21	84.7	15.4	1.1	83	109	58	MOLECULE: SERUM RESPONSE FACTOR;	NP_001964.2	NP_001964	60	73.85	65	26	0	21	85	21	85	1e-19	90.5	IPR000418; IPR011991	Y	ELK4	9606 [Organism: human] [Scientific Name: Homo sapiens]	Y	26	1BC8-C	-	-	-	-	-	-	-	-	-
1HBX	H	P28324	gi|14719553|pdb|1HBX|H	61.9	74.6	63	24	0	23	85	24	86	2e-21	84.7	15.4	1.1	83	109	58	MOLECULE: SERUM RESPONSE FACTOR;	NP_001964.2	NP_001964	60	73.85	65	26	0	21	85	21	85	1e-19	90.5	IPR000418; IPR011991	Y	ELK4	9606 [Organism: human] [Scientific Name: Homo sapiens]	Y	26	1BC8-C	-	-	-	-	-	-	-	-	-
1HBX	H	P28324	gi|14719553|pdb|1HBX|H	61.9	74.6	63	24	0	23	85	24	86	2e-21	84.7	15.4	1.1	83	109	58	MOLECULE: SERUM RESPONSE FACTOR;	NP_001964.2	NP_001964	60	73.85	65	26	0	21	85	21	85	1e-19	90.5	IPR000418; IPR011991	Y	ELK4	9606 [Organism: human] [Scientific Name: Homo sapiens]	Y	26	1BC8-C	-	-	-	-	-	-	-	-	-
1HBX	H	P28324	gi|14719553|pdb|1HBX|H	61.9	74.6	63	24	0	23	85	24	86	2e-21	84.7	15.4	1.1	83	109	58	MOLECULE: SERUM RESPONSE FACTOR;	NP_001964.2	NP_001964	60	73.85	65	26	0	21	85	21	85	1e-19	90.5	IPR000418; IPR011991	Y	ELK4	9606 [Organism: human] [Scientific Name: Homo sapiens]	Y	26	1BC8-C	-	-	-	-	-	-	-	-	-
1HBX	H	P28324	gi|14719553|pdb|1HBX|H	61.9	74.6	63	24	0	23	85	24	86	2e-21	84.7	15.4	1.1	83	109	58	MOLECULE: SERUM RESPONSE FACTOR;	NP_001964.2	NP_001964	60	73.85	65	26	0	21	85	21	85	1e-19	90.5	IPR000418; IPR011991	Y	ELK4	9606 [Organism: human] [Scientific Name: Homo sapiens]	Y	26	1BC8-C	-	-	-	-	-	-	-	-	-
1HBX	H	P28324	gi|14719553|pdb|1HBX|H	61.9	74.6	63	24	0	23	85	24	86	2e-21	84.7	15.4	1.1	83	109	58	MOLECULE: SERUM RESPONSE FACTOR;	NP_001964.2	NP_001964	60	73.85	65	26	0	21	85	21	85	1e-19	90.5	IPR000418; IPR011991	Y	ELK4	9606 [Organism: human] [Scientific Name: Homo sapiens]	Y	26	1BC8-C	-	-	-	-	-	-	-	-	-
1HBX	H	P28324	gi|14719553|pdb|1HBX|H	61.9	74.6	63	24	0	23	85	24	86	2e-21	84.7	15.4	1.1	83	109	58	MOLECULE: SERUM RESPONSE FACTOR;	NP_001964.2	NP_001964	60	73.85	65	26	0	21	85	21	85	1e-19	90.5	IPR000418; IPR011991	Y	ELK4	9606 [Organism: human] [Scientific Name: Homo sapiens]	Y	26	1BC8-C	-	-	-	-	-	-	-	-	-
1HBX	H	P28324	gi|14719553|pdb|1HBX|H	61.9	74.6	63	24	0	23	85	24	86	2e-21	84.7	15.4	1.1	83	109	58	MOLECULE: SERUM RESPONSE FACTOR;	NP_001964.2	NP_001964	60	73.85	65	26	0	21	85	21	85	1e-19	90.5	IPR000418; IPR011991	Y	ELK4	9606 [Organism: human] [Scientific Name: Homo sapiens]	Y	26	1BC8-C	-	-	-	-	-	-	-	-	-
1HBX	H	P28324	gi|14719553|pdb|1HBX|H	61.9	74.6	63	24	0	23	85	24	86	2e-21	84.7	15.4	1.1	83	109	58	MOLECULE: SERUM RESPONSE FACTOR;	NP_001964.2	NP_001964	60	73.85	65	26	0	21	85	21	85	1e-19	90.5	IPR000418; IPR011991	Y	ELK4	9606 [Organism: human] [Scientific Name: Homo sapiens]	Y	26	1BC8-C	-	-	-	-	-	-	-	-	-
1HBX	H	P28324	gi|14719553|pdb|1HBX|H	61.9	74.6	63	24	0	23	85	24	86	2e-21	84.7	15.4	1.1	83	109	58	MOLECULE: SERUM RESPONSE FACTOR;	NP_001964.2	NP_001964	60	73.85	65	26	0	21	85	21	85	1e-19	90.5	IPR000418; IPR011991	Y	ELK4	9606 [Organism: human] [Scientific Name: Homo sapiens]	Y	26	1BC8-C	-	-	-	-	-	-	-	-	-
1HBX	H	P28324	gi|14719553|pdb|1HBX|H	61.9	74.6	63	24	0	23	85	24	86	2e-21	84.7	15.4	1.1	83	109	58	MOLECULE: SERUM RESPONSE FACTOR;	NP_001964.2	NP_001964	60	73.85	65	26	0	21	85	21	85	1e-19	90.5	IPR000418; IPR011991	Y	ELK4	9606 [Organism: human] [Scientific Name: Homo sapiens]	Y	26	1BC8-C	-	-	-	-	-	-	-	-	-
1HBX	H	P28324	gi|14719553|pdb|1HBX|H	61.9	74.6	63	24	0	23	85	24	86	2e-21	84.7	15.4	1.1	83	109	58	MOLECULE: SERUM RESPONSE FACTOR;	NP_001964.2	NP_001964	60	73.85	65	26	0	21	85	21	85	1e-19	90.5	IPR000418; IPR011991	Y	ELK4	9606 [Organism: human] [Scientific Name: Homo sapiens]	Y	26	1BC8-C	-	-	-	-	-	-	-	-	-
1HBX	H	P28324	gi|14719553|pdb|1HBX|H	61.9	74.6	63	24	0	23	85	24	86	2e-21	84.7	15.4	1.1	83	109	58	MOLECULE: SERUM RESPONSE FACTOR;	NP_068567.1	NP_068567	60	73.85	65	26	0	21	85	21	85	9e-20	90.5	IPR000418; IPR011991	Y	ELK4	9606 [Organism: human] [Scientific Name: Homo sapiens]	Y	26	1BC8-C	-	-	-	-	-	-	-	-	-
1HBX	H	P28324	gi|14719553|pdb|1HBX|H	61.9	74.6	63	24	0	23	85	24	86	2e-21	84.7	15.4	1.1	83	109	58	MOLECULE: SERUM RESPONSE FACTOR;	NP_068567.1	NP_068567	60	73.85	65	26	0	21	85	21	85	9e-20	90.5	IPR000418; IPR011991	Y	ELK4	9606 [Organism: human] [Scientific Name: Homo sapiens]	Y	26	1BC8-C	-	-	-	-	-	-	-	-	-
1HBX	H	P28324	gi|14719553|pdb|1HBX|H	61.9	74.6	63	24	0	23	85	24	86	2e-21	84.7	15.4	1.1	83	109	58	MOLECULE: SERUM RESPONSE FACTOR;	NP_068567.1	NP_068567	60	73.85	65	26	0	21	85	21	85	9e-20	90.5	IPR000418; IPR011991	Y	ELK4	9606 [Organism: human] [Scientific Name: Homo sapiens]	Y	26	1BC8-C	-	-	-	-	-	-	-	-	-
1HBX	H	P28324	gi|14719553|pdb|1HBX|H	61.9	74.6	63	24	0	23	85	24	86	2e-21	84.7	15.4	1.1	83	109	58	MOLECULE: SERUM RESPONSE FACTOR;	NP_068567.1	NP_068567	60	73.85	65	26	0	21	85	21	85	9e-20	90.5	IPR000418; IPR011991	Y	ELK4	9606 [Organism: human] [Scientific Name: Homo sapiens]	Y	26	1BC8-C	-	-	-	-	-	-	-	-	-
1HBX	H	P28324	gi|14719553|pdb|1HBX|H	61.9	74.6	63	24	0	23	85	24	86	2e-21	84.7	15.4	1.1	83	109	58	MOLECULE: SERUM RESPONSE FACTOR;	NP_068567.1	NP_068567	60	73.85	65	26	0	21	85	21	85	9e-20	90.5	IPR000418; IPR011991	Y	ELK4	9606 [Organism: human] [Scientific Name: Homo sapiens]	Y	26	1BC8-C	-	-	-	-	-	-	-	-	-
1HBX	H	P28324	gi|14719553|pdb|1HBX|H	61.9	74.6	63	24	0	23	85	24	86	2e-21	84.7	15.4	1.1	83	109	58	MOLECULE: SERUM RESPONSE FACTOR;	NP_068567.1	NP_068567	60	73.85	65	26	0	21	85	21	85	9e-20	90.5	IPR000418; IPR011991	Y	ELK4	9606 [Organism: human] [Scientific Name: Homo sapiens]	Y	26	1BC8-C	-	-	-	-	-	-	-	-	-
1HBX	H	P28324	gi|14719553|pdb|1HBX|H	61.9	74.6	63	24	0	23	85	24	86	2e-21	84.7	15.4	1.1	83	109	58	MOLECULE: SERUM RESPONSE FACTOR;	NP_068567.1	NP_068567	60	73.85	65	26	0	21	85	21	85	9e-20	90.5	IPR000418; IPR011991	Y	ELK4	9606 [Organism: human] [Scientific Name: Homo sapiens]	Y	26	1BC8-C	-	-	-	-	-	-	-	-	-
1HBX	H	P28324	gi|14719553|pdb|1HBX|H	61.9	74.6	63	24	0	23	85	24	86	2e-21	84.7	15.4	1.1	83	109	58	MOLECULE: SERUM RESPONSE FACTOR;	NP_068567.1	NP_068567	60	73.85	65	26	0	21	85	21	85	9e-20	90.5	IPR000418; IPR011991	Y	ELK4	9606 [Organism: human] [Scientific Name: Homo sapiens]	Y	26	1BC8-C	-	-	-	-	-	-	-	-	-
1HBX	H	P28324	gi|14719553|pdb|1HBX|H	61.9	74.6	63	24	0	23	85	24	86	2e-21	84.7	15.4	1.1	83	109	58	MOLECULE: SERUM RESPONSE FACTOR;	NP_068567.1	NP_068567	60	73.85	65	26	0	21	85	21	85	9e-20	90.5	IPR000418; IPR011991	Y	ELK4	9606 [Organism: human] [Scientific Name: Homo sapiens]	Y	26	1BC8-C	-	-	-	-	-	-	-	-	-
1HBX	H	P28324	gi|14719553|pdb|1HBX|H	61.9	74.6	63	24	0	23	85	24	86	2e-21	84.7	15.4	1.1	83	109	58	MOLECULE: SERUM RESPONSE FACTOR;	NP_068567.1	NP_068567	60	73.85	65	26	0	21	85	21	85	9e-20	90.5	IPR000418; IPR011991	Y	ELK4	9606 [Organism: human] [Scientific Name: Homo sapiens]	Y	26	1BC8-C	-	-	-	-	-	-	-	-	-
1HBX	H	P28324	gi|14719553|pdb|1HBX|H	61.9	74.6	63	24	0	23	85	24	86	2e-21	84.7	15.4	1.1	83	109	58	MOLECULE: SERUM RESPONSE FACTOR;	NP_068567.1	NP_068567	60	73.85	65	26	0	21	85	21	85	9e-20	90.5	IPR000418; IPR011991	Y	ELK4	9606 [Organism: human] [Scientific Name: Homo sapiens]	Y	26	1BC8-C	-	-	-	-	-	-	-	-	-
1HBX	H	P28324	gi|14719553|pdb|1HBX|H	61.9	74.6	63	24	0	23	85	24	86	2e-21	84.7	15.4	1.1	83	109	58	MOLECULE: SERUM RESPONSE FACTOR;	NP_068567.1	NP_068567	60	73.85	65	26	0	21	85	21	85	9e-20	90.5	IPR000418; IPR011991	Y	ELK4	9606 [Organism: human] [Scientific Name: Homo sapiens]	Y	26	1BC8-C	-	-	-	-	-	-	-	-	-
1HBX	H	P28324	gi|14719553|pdb|1HBX|H	61.9	74.6	63	24	0	23	85	24	86	2e-21	84.7	15.4	1.1	83	109	58	MOLECULE: SERUM RESPONSE FACTOR;	NP_068567.1	NP_068567	60	73.85	65	26	0	21	85	21	85	9e-20	90.5	IPR000418; IPR011991	Y	ELK4	9606 [Organism: human] [Scientific Name: Homo sapiens]	Y	26	1BC8-C	-	-	-	-	-	-	-	-	-
1HBX	H	P28324	gi|14719553|pdb|1HBX|H	61.9	74.6	63	24	0	23	85	24	86	2e-21	84.7	15.4	1.1	83	109	58	MOLECULE: SERUM RESPONSE FACTOR;	NP_068567.1	NP_068567	60	73.85	65	26	0	21	85	21	85	9e-20	90.5	IPR000418; IPR011991	Y	ELK4	9606 [Organism: human] [Scientific Name: Homo sapiens]	Y	26	1BC8-C	-	-	-	-	-	-	-	-	-
1HBX	H	P28324	gi|14719553|pdb|1HBX|H	61.9	74.6	63	24	0	23	85	24	86	2e-21	84.7	15.4	1.1	83	109	58	MOLECULE: SERUM RESPONSE FACTOR;	NP_068567.1	NP_068567	60	73.85	65	26	0	21	85	21	85	9e-20	90.5	IPR000418; IPR011991	Y	ELK4	9606 [Organism: human] [Scientific Name: Homo sapiens]	Y	26	1BC8-C	-	-	-	-	-	-	-	-	-
1HBX	H	P28324	gi|14719553|pdb|1HBX|H	61.9	74.6	63	24	0	23	85	24	86	2e-21	84.7	15.4	1.1	83	109	58	MOLECULE: SERUM RESPONSE FACTOR;	NP_068567.1	NP_068567	60	73.85	65	26	0	21	85	21	85	9e-20	90.5	IPR000418; IPR011991	Y	ELK4	9606 [Organism: human] [Scientific Name: Homo sapiens]	Y	26	1BC8-C	-	-	-	-	-	-	-	-	-
1HBX	H	P28324	gi|14719553|pdb|1HBX|H	61.9	74.6	63	24	0	23	85	24	86	2e-21	84.7	15.4	1.1	83	109	58	MOLECULE: SERUM RESPONSE FACTOR;	NP_068567.1	NP_068567	60	73.85	65	26	0	21	85	21	85	9e-20	90.5	IPR000418; IPR011991	Y	ELK4	9606 [Organism: human] [Scientific Name: Homo sapiens]	Y	26	1BC8-C	-	-	-	-	-	-	-	-	-
1HBX	H	P28324	gi|14719553|pdb|1HBX|H	61.9	74.6	63	24	0	23	85	24	86	2e-21	84.7	15.4	1.1	83	109	58	MOLECULE: SERUM RESPONSE FACTOR;	NP_068567.1	NP_068567	60	73.85	65	26	0	21	85	21	85	9e-20	90.5	IPR000418; IPR011991	Y	ELK4	9606 [Organism: human] [Scientific Name: Homo sapiens]	Y	26	1BC8-C	-	-	-	-	-	-	-	-	-
1HBX	H	P28324	gi|14719553|pdb|1HBX|H	61.9	74.6	63	24	0	23	85	24	86	2e-21	84.7	15.4	1.1	83	109	58	MOLECULE: SERUM RESPONSE FACTOR;	NP_068567.1	NP_068567	60	73.85	65	26	0	21	85	21	85	9e-20	90.5	IPR000418; IPR011991	Y	ELK4	9606 [Organism: human] [Scientific Name: Homo sapiens]	Y	26	1BC8-C	-	-	-	-	-	-	-	-	-
1HBX	H	P28324	gi|14719553|pdb|1HBX|H	61.9	74.6	63	24	0	23	85	24	86	2e-21	84.7	15.4	1.1	83	109	58	MOLECULE: SERUM RESPONSE FACTOR;	NP_068567.1	NP_068567	60	73.85	65	26	0	21	85	21	85	9e-20	90.5	IPR000418; IPR011991	Y	ELK4	9606 [Organism: human] [Scientific Name: Homo sapiens]	Y	26	1BC8-C	-	-	-	-	-	-	-	-	-
1HBX	H	P28324	gi|14719553|pdb|1HBX|H	61.9	74.6	63	24	0	23	85	24	86	2e-21	84.7	15.4	1.1	83	109	58	MOLECULE: SERUM RESPONSE FACTOR;	NP_068567.1	NP_068567	60	73.85	65	26	0	21	85	21	85	9e-20	90.5	IPR000418; IPR011991	Y	ELK4	9606 [Organism: human] [Scientific Name: Homo sapiens]	Y	26	1BC8-C	-	-	-	-	-	-	-	-	-
1HBX	H	P28324	gi|14719553|pdb|1HBX|H	61.9	74.6	63	24	0	23	85	24	86	2e-21	84.7	15.4	1.1	83	109	58	MOLECULE: SERUM RESPONSE FACTOR;	NP_068567.1	NP_068567	60	73.85	65	26	0	21	85	21	85	9e-20	90.5	IPR000418; IPR011991	Y	ELK4	9606 [Organism: human] [Scientific Name: Homo sapiens]	Y	26	1BC8-C	-	-	-	-	-	-	-	-	-
1HBX	H	P28324	gi|14719553|pdb|1HBX|H	61.9	74.6	63	24	0	23	85	24	86	2e-21	84.7	15.4	1.1	83	109	58	MOLECULE: SERUM RESPONSE FACTOR;	NP_068567.1	NP_068567	60	73.85	65	26	0	21	85	21	85	9e-20	90.5	IPR000418; IPR011991	Y	ELK4	9606 [Organism: human] [Scientific Name: Homo sapiens]	Y	26	1BC8-C	-	-	-	-	-	-	-	-	-
1HBX	H	P28324	gi|14719553|pdb|1HBX|H	61.9	74.6	63	24	0	23	85	24	86	2e-21	84.7	15.4	1.1	83	109	58	MOLECULE: SERUM RESPONSE FACTOR;	NP_068567.1	NP_068567	60	73.85	65	26	0	21	85	21	85	9e-20	90.5	IPR000418; IPR011991	Y	ELK4	9606 [Organism: human] [Scientific Name: Homo sapiens]	Y	26	1BC8-C	-	-	-	-	-	-	-	-	-
1HBX	H	P28324	gi|14719553|pdb|1HBX|H	61.9	74.6	63	24	0	23	85	24	86	2e-21	84.7	15.4	1.1	83	109	58	MOLECULE: SERUM RESPONSE FACTOR;	NP_068567.1	NP_068567	60	73.85	65	26	0	21	85	21	85	9e-20	90.5	IPR000418; IPR011991	Y	ELK4	9606 [Organism: human] [Scientific Name: Homo sapiens]	Y	26	1BC8-C	-	-	-	-	-	-	-	-	-
1HBX	H	P28324	gi|14719553|pdb|1HBX|H	61.9	74.6	63	24	0	23	85	24	86	2e-21	84.7	15.4	1.1	83	109	58	MOLECULE: SERUM RESPONSE FACTOR;	NP_068567.1	NP_068567	60	73.85	65	26	0	21	85	21	85	9e-20	90.5	IPR000418; IPR011991	Y	ELK4	9606 [Organism: human] [Scientific Name: Homo sapiens]	Y	26	1BC8-C	-	-	-	-	-	-	-	-	-
1HBX	H	P28324	gi|14719553|pdb|1HBX|H	61.9	74.6	63	24	0	23	85	24	86	2e-21	84.7	15.4	1.1	83	109	58	MOLECULE: SERUM RESPONSE FACTOR;	NP_068567.1	NP_068567	60	73.85	65	26	0	21	85	21	85	9e-20	90.5	IPR000418; IPR011991	Y	ELK4	9606 [Organism: human] [Scientific Name: Homo sapiens]	Y	26	1BC8-C	-	-	-	-	-	-	-	-	-
1HBX	H	P28324	gi|14719553|pdb|1HBX|H	61.9	74.6	63	24	0	23	85	24	86	2e-21	84.7	15.4	1.1	83	109	58	MOLECULE: SERUM RESPONSE FACTOR;	NP_068567.1	NP_068567	60	73.85	65	26	0	21	85	21	85	9e-20	90.5	IPR000418; IPR011991	Y	ELK4	9606 [Organism: human] [Scientific Name: Homo sapiens]	Y	26	1BC8-C	-	-	-	-	-	-	-	-	-
1HBX	H	P28324	gi|14719553|pdb|1HBX|H	61.9	74.6	63	24	0	23	85	24	86	2e-21	84.7	15.4	1.1	83	109	58	MOLECULE: SERUM RESPONSE FACTOR;	NP_068567.1	NP_068567	60	73.85	65	26	0	21	85	21	85	9e-20	90.5	IPR000418; IPR011991	Y	ELK4	9606 [Organism: human] [Scientific Name: Homo sapiens]	Y	26	1BC8-C	-	-	-	-	-	-	-	-	-
1HBX	H	P28324	gi|14719553|pdb|1HBX|H	61.9	74.6	63	24	0	23	85	24	86	2e-21	84.7	15.4	1.1	83	109	58	MOLECULE: SERUM RESPONSE FACTOR;	NP_068567.1	NP_068567	60	73.85	65	26	0	21	85	21	85	9e-20	90.5	IPR000418; IPR011991	Y	ELK4	9606 [Organism: human] [Scientific Name: Homo sapiens]	Y	26	1BC8-C	-	-	-	-	-	-	-	-	-
1HBX	H	P28324	gi|14719553|pdb|1HBX|H	61.9	74.6	63	24	0	23	85	24	86	2e-21	84.7	15.4	1.1	83	109	58	MOLECULE: SERUM RESPONSE FACTOR;	NP_068567.1	NP_068567	60	73.85	65	26	0	21	85	21	85	9e-20	90.5	IPR000418; IPR011991	Y	ELK4	9606 [Organism: human] [Scientific Name: Homo sapiens]	Y	26	1BC8-C	-	-	-	-	-	-	-	-	-
1HBX	H	P28324	gi|14719553|pdb|1HBX|H	61.9	74.6	63	24	0	23	85	24	86	2e-21	84.7	15.4	1.1	83	109	58	MOLECULE: SERUM RESPONSE FACTOR;	NP_068567.1	NP_068567	60	73.85	65	26	0	21	85	21	85	9e-20	90.5	IPR000418; IPR011991	Y	ELK4	9606 [Organism: human] [Scientific Name: Homo sapiens]	Y	26	1BC8-C	-	-	-	-	-	-	-	-	-
1HBX	H	P28324	gi|14719553|pdb|1HBX|H	61.9	74.6	63	24	0	23	85	24	86	2e-21	84.7	15.4	1.1	83	109	58	MOLECULE: SERUM RESPONSE FACTOR;	NP_068567.1	NP_068567	60	73.85	65	26	0	21	85	21	85	9e-20	90.5	IPR000418; IPR011991	Y	ELK4	9606 [Organism: human] [Scientific Name: Homo sapiens]	Y	26	1BC8-C	-	-	-	-	-	-	-	-	-
1HBX	H	P28324	gi|14719553|pdb|1HBX|H	61.9	74.6	63	24	0	23	85	24	86	2e-21	84.7	15.4	1.1	83	109	58	MOLECULE: SERUM RESPONSE FACTOR;	NP_068567.1	NP_068567	60	73.85	65	26	0	21	85	21	85	9e-20	90.5	IPR000418; IPR011991	Y	ELK4	9606 [Organism: human] [Scientific Name: Homo sapiens]	Y	26	1BC8-C	-	-	-	-	-	-	-	-	-
1HBX	H	P28324	gi|14719553|pdb|1HBX|H	61.9	74.6	63	24	0	23	85	24	86	2e-21	84.7	15.4	1.1	83	109	58	MOLECULE: SERUM RESPONSE FACTOR;	NP_068567.1	NP_068567	60	73.85	65	26	0	21	85	21	85	9e-20	90.5	IPR000418; IPR011991	Y	ELK4	9606 [Organism: human] [Scientific Name: Homo sapiens]	Y	26	1BC8-C	-	-	-	-	-	-	-	-	-
1HBX	H	P28324	gi|14719553|pdb|1HBX|H	61.9	74.6	63	24	0	23	85	24	86	2e-21	84.7	15.4	1.1	83	109	58	MOLECULE: SERUM RESPONSE FACTOR;	NP_068567.1	NP_068567	60	73.85	65	26	0	21	85	21	85	9e-20	90.5	IPR000418; IPR011991	Y	ELK4	9606 [Organism: human] [Scientific Name: Homo sapiens]	Y	26	1BC8-C	-	-	-	-	-	-	-	-	-
1HBX	H	P28324	gi|14719553|pdb|1HBX|H	61.9	74.6	63	24	0	23	85	24	86	2e-21	84.7	15.4	1.1	83	109	58	MOLECULE: SERUM RESPONSE FACTOR;	NP_068567.1	NP_068567	60	73.85	65	26	0	21	85	21	85	9e-20	90.5	IPR000418; IPR011991	Y	ELK4	9606 [Organism: human] [Scientific Name: Homo sapiens]	Y	26	1BC8-C	-	-	-	-	-	-	-	-	-
1HBX	H	P28324	gi|14719553|pdb|1HBX|H	61.9	74.6	63	24	0	23	85	24	86	2e-21	84.7	15.4	1.1	83	109	58	MOLECULE: SERUM RESPONSE FACTOR;	NP_068567.1	NP_068567	60	73.85	65	26	0	21	85	21	85	9e-20	90.5	IPR000418; IPR011991	Y	ELK4	9606 [Organism: human] [Scientific Name: Homo sapiens]	Y	26	1BC8-C	-	-	-	-	-	-	-	-	-
1HBX	H	P28324	gi|14719553|pdb|1HBX|H	61.9	74.6	63	24	0	23	85	24	86	2e-21	84.7	15.4	1.1	83	109	58	MOLECULE: SERUM RESPONSE FACTOR;	NP_068567.1	NP_068567	60	73.85	65	26	0	21	85	21	85	9e-20	90.5	IPR000418; IPR011991	Y	ELK4	9606 [Organism: human] [Scientific Name: Homo sapiens]	Y	26	1BC8-C	-	-	-	-	-	-	-	-	-
1HBX	H	P28324	gi|14719553|pdb|1HBX|H	61.9	74.6	63	24	0	23	85	24	86	2e-21	84.7	15.4	1.1	83	109	58	MOLECULE: SERUM RESPONSE FACTOR;	NP_068567.1	NP_068567	60	73.85	65	26	0	21	85	21	85	9e-20	90.5	IPR000418; IPR011991	Y	ELK4	9606 [Organism: human] [Scientific Name: Homo sapiens]	Y	26	1BC8-C	-	-	-	-	-	-	-	-	-
1HBX	H	P28324	gi|14719553|pdb|1HBX|H	61.9	74.6	63	24	0	23	85	24	86	2e-21	84.7	15.4	1.1	83	109	58	MOLECULE: SERUM RESPONSE FACTOR;	NP_068567.1	NP_068567	60	73.85	65	26	0	21	85	21	85	9e-20	90.5	IPR000418; IPR011991	Y	ELK4	9606 [Organism: human] [Scientific Name: Homo sapiens]	Y	26	1BC8-C	-	-	-	-	-	-	-	-	-
1HBX	H	P28324	gi|14719553|pdb|1HBX|H	61.9	74.6	63	24	0	23	85	24	86	2e-21	84.7	15.4	1.1	83	109	58	MOLECULE: SERUM RESPONSE FACTOR;	NP_068567.1	NP_068567	60	73.85	65	26	0	21	85	21	85	9e-20	90.5	IPR000418; IPR011991	Y	ELK4	9606 [Organism: human] [Scientific Name: Homo sapiens]	Y	26	1BC8-C	-	-	-	-	-	-	-	-	-
1HBX	H	P28324	gi|14719553|pdb|1HBX|H	61.9	74.6	63	24	0	23	85	24	86	2e-21	84.7	15.4	1.1	83	109	58	MOLECULE: SERUM RESPONSE FACTOR;	NP_068567.1	NP_068567	60	73.85	65	26	0	21	85	21	85	9e-20	90.5	IPR000418; IPR011991	Y	ELK4	9606 [Organism: human] [Scientific Name: Homo sapiens]	Y	26	1BC8-C	-	-	-	-	-	-	-	-	-
1HBX	H	P28324	gi|14719553|pdb|1HBX|H	61.9	74.6	63	24	0	23	85	24	86	2e-21	84.7	15.4	1.1	83	109	58	MOLECULE: SERUM RESPONSE FACTOR;	NP_068567.1	NP_068567	60	73.85	65	26	0	21	85	21	85	9e-20	90.5	IPR000418; IPR011991	Y	ELK4	9606 [Organism: human] [Scientific Name: Homo sapiens]	Y	26	1BC8-C	-	-	-	-	-	-	-	-	-
1HBX	H	P28324	gi|14719553|pdb|1HBX|H	61.9	74.6	63	24	0	23	85	24	86	2e-21	84.7	15.4	1.1	83	109	58	MOLECULE: SERUM RESPONSE FACTOR;	NP_068567.1	NP_068567	60	73.85	65	26	0	21	85	21	85	9e-20	90.5	IPR000418; IPR011991	Y	ELK4	9606 [Organism: human] [Scientific Name: Homo sapiens]	Y	26	1BC8-C	-	-	-	-	-	-	-	-	-
1HBX	H	P28324	gi|14719553|pdb|1HBX|H	61.9	74.6	63	24	0	23	85	24	86	2e-21	84.7	15.4	1.1	83	109	58	MOLECULE: SERUM RESPONSE FACTOR;	NP_068567.1	NP_068567	60	73.85	65	26	0	21	85	21	85	9e-20	90.5	IPR000418; IPR011991	Y	ELK4	9606 [Organism: human] [Scientific Name: Homo sapiens]	Y	26	1BC8-C	-	-	-	-	-	-	-	-	-
1HBX	H	P28324	gi|14719553|pdb|1HBX|H	61.9	74.6	63	24	0	23	85	24	86	2e-21	84.7	15.4	1.1	83	109	58	MOLECULE: SERUM RESPONSE FACTOR;	NP_068567.1	NP_068567	60	73.85	65	26	0	21	85	21	85	9e-20	90.5	IPR000418; IPR011991	Y	ELK4	9606 [Organism: human] [Scientific Name: Homo sapiens]	Y	26	1BC8-C	-	-	-	-	-	-	-	-	-
1HBX	H	P28324	gi|14719553|pdb|1HBX|H	61.9	74.6	63	24	0	23	85	24	86	2e-21	84.7	15.4	1.1	83	109	58	MOLECULE: SERUM RESPONSE FACTOR;	NP_068567.1	NP_068567	60	73.85	65	26	0	21	85	21	85	9e-20	90.5	IPR000418; IPR011991	Y	ELK4	9606 [Organism: human] [Scientific Name: Homo sapiens]	Y	26	1BC8-C	-	-	-	-	-	-	-	-	-
1HBX	H	P28324	gi|14719553|pdb|1HBX|H	61.9	74.6	63	24	0	23	85	24	86	2e-21	84.7	15.4	1.1	83	109	58	MOLECULE: SERUM RESPONSE FACTOR;	NP_068567.1	NP_068567	60	73.85	65	26	0	21	85	21	85	9e-20	90.5	IPR000418; IPR011991	Y	ELK4	9606 [Organism: human] [Scientific Name: Homo sapiens]	Y	26	1BC8-C	-	-	-	-	-	-	-	-	-
1DUX	F	P19419	gi|7767066|pdb|1DUX|F	63.41	76.83	82	29	1	5	85	5	86	1e-30	107	15.4	1.2	81	86	63	'MOLECULE: DNA (5''- '	NP_001107595.1	NP_001107595	63.41	76.83	82	29	1	5	85	5	86	1e-28	115	IPR011991; IPR000418	Y	ELK1	9606 [Organism: human] [Scientific Name: Homo sapiens]	Y	17	1DUX-C00	-	-	-	-	-	-	-	-	-
1DUX	F	P19419	gi|7767066|pdb|1DUX|F	63.41	76.83	82	29	1	5	85	5	86	1e-30	107	15.4	1.2	81	86	63	'MOLECULE: DNA (5''- '	NP_001244097.1	NP_001244097	63.41	76.83	82	29	1	5	85	5	86	7e-28	106	IPR011991; IPR000418	Y	ELK1	9606 [Organism: human] [Scientific Name: Homo sapiens]	Y	17	1DUX-C00	-	-	-	-	-	-	-	-	-
1DUX	F	P19419	gi|7767066|pdb|1DUX|F	63.41	76.83	82	29	1	5	85	5	86	1e-30	107	15.4	1.2	81	86	63	'MOLECULE: DNA (5''- '	NP_001244097.1	NP_001244097	63.41	76.83	82	29	1	5	85	5	86	7e-28	106	IPR011991; IPR000418	Y	ELK1	9606 [Organism: human] [Scientific Name: Homo sapiens]	Y	17	1DUX-C00	-	-	-	-	-	-	-	-	-
1DUX	F	P19419	gi|7767066|pdb|1DUX|F	63.41	76.83	82	29	1	5	85	5	86	1e-30	107	15.4	1.2	81	86	63	'MOLECULE: DNA (5''- '	NP_001244097.1	NP_001244097	63.41	76.83	82	29	1	5	85	5	86	7e-28	106	IPR011991; IPR000418	Y	ELK1	9606 [Organism: human] [Scientific Name: Homo sapiens]	Y	17	1DUX-C00	-	-	-	-	-	-	-	-	-
1DUX	F	P19419	gi|7767066|pdb|1DUX|F	63.41	76.83	82	29	1	5	85	5	86	1e-30	107	15.4	1.2	81	86	63	'MOLECULE: DNA (5''- '	NP_001244097.1	NP_001244097	63.41	76.83	82	29	1	5	85	5	86	7e-28	106	IPR011991; IPR000418	Y	ELK1	9606 [Organism: human] [Scientific Name: Homo sapiens]	Y	17	1DUX-C00	-	-	-	-	-	-	-	-	-
1DUX	F	P19419	gi|7767066|pdb|1DUX|F	63.41	76.83	82	29	1	5	85	5	86	1e-30	107	15.4	1.2	81	86	63	'MOLECULE: DNA (5''- '	NP_001244097.1	NP_001244097	63.41	76.83	82	29	1	5	85	5	86	7e-28	106	IPR011991; IPR000418	Y	ELK1	9606 [Organism: human] [Scientific Name: Homo sapiens]	Y	17	1DUX-C00	-	-	-	-	-	-	-	-	-
1DUX	F	P19419	gi|7767066|pdb|1DUX|F	63.41	76.83	82	29	1	5	85	5	86	1e-30	107	15.4	1.2	81	86	63	'MOLECULE: DNA (5''- '	NP_001244097.1	NP_001244097	63.41	76.83	82	29	1	5	85	5	86	7e-28	106	IPR011991; IPR000418	Y	ELK1	9606 [Organism: human] [Scientific Name: Homo sapiens]	Y	17	1DUX-C00	-	-	-	-	-	-	-	-	-
1DUX	F	P19419	gi|7767066|pdb|1DUX|F	63.41	76.83	82	29	1	5	85	5	86	1e-30	107	15.4	1.2	81	86	63	'MOLECULE: DNA (5''- '	NP_001244097.1	NP_001244097	63.41	76.83	82	29	1	5	85	5	86	7e-28	106	IPR011991; IPR000418	Y	ELK1	9606 [Organism: human] [Scientific Name: Homo sapiens]	Y	17	1DUX-C00	-	-	-	-	-	-	-	-	-
1DUX	F	P19419	gi|7767066|pdb|1DUX|F	63.41	76.83	82	29	1	5	85	5	86	1e-30	107	15.4	1.2	81	86	63	'MOLECULE: DNA (5''- '	NP_001244097.1	NP_001244097	63.41	76.83	82	29	1	5	85	5	86	7e-28	106	IPR011991; IPR000418	Y	ELK1	9606 [Organism: human] [Scientific Name: Homo sapiens]	Y	17	1DUX-C00	-	-	-	-	-	-	-	-	-
1DUX	F	P19419	gi|7767066|pdb|1DUX|F	63.41	76.83	82	29	1	5	85	5	86	1e-30	107	15.4	1.2	81	86	63	'MOLECULE: DNA (5''- '	NP_001244097.1	NP_001244097	63.41	76.83	82	29	1	5	85	5	86	7e-28	106	IPR011991; IPR000418	Y	ELK1	9606 [Organism: human] [Scientific Name: Homo sapiens]	Y	17	1DUX-C00	-	-	-	-	-	-	-	-	-
1DUX	F	P19419	gi|7767066|pdb|1DUX|F	63.41	76.83	82	29	1	5	85	5	86	1e-30	107	15.4	1.2	81	86	63	'MOLECULE: DNA (5''- '	NP_001244097.1	NP_001244097	63.41	76.83	82	29	1	5	85	5	86	7e-28	106	IPR011991; IPR000418	Y	ELK1	9606 [Organism: human] [Scientific Name: Homo sapiens]	Y	17	1DUX-C00	-	-	-	-	-	-	-	-	-
1DUX	F	P19419	gi|7767066|pdb|1DUX|F	63.41	76.83	82	29	1	5	85	5	86	1e-30	107	15.4	1.2	81	86	63	'MOLECULE: DNA (5''- '	NP_001244097.1	NP_001244097	63.41	76.83	82	29	1	5	85	5	86	7e-28	106	IPR011991; IPR000418	Y	ELK1	9606 [Organism: human] [Scientific Name: Homo sapiens]	Y	17	1DUX-C00	-	-	-	-	-	-	-	-	-
1DUX	F	P19419	gi|7767066|pdb|1DUX|F	63.41	76.83	82	29	1	5	85	5	86	1e-30	107	15.4	1.2	81	86	63	'MOLECULE: DNA (5''- '	NP_001244097.1	NP_001244097	63.41	76.83	82	29	1	5	85	5	86	7e-28	106	IPR011991; IPR000418	Y	ELK1	9606 [Organism: human] [Scientific Name: Homo sapiens]	Y	17	1DUX-C00	-	-	-	-	-	-	-	-	-
1DUX	F	P19419	gi|7767066|pdb|1DUX|F	63.41	76.83	82	29	1	5	85	5	86	1e-30	107	15.4	1.2	81	86	63	'MOLECULE: DNA (5''- '	NP_001244097.1	NP_001244097	63.41	76.83	82	29	1	5	85	5	86	7e-28	106	IPR011991; IPR000418	Y	ELK1	9606 [Organism: human] [Scientific Name: Homo sapiens]	Y	17	1DUX-C00	-	-	-	-	-	-	-	-	-
1DUX	F	P19419	gi|7767066|pdb|1DUX|F	63.41	76.83	82	29	1	5	85	5	86	1e-30	107	15.4	1.2	81	86	63	'MOLECULE: DNA (5''- '	NP_001244097.1	NP_001244097	63.41	76.83	82	29	1	5	85	5	86	7e-28	106	IPR011991; IPR000418	Y	ELK1	9606 [Organism: human] [Scientific Name: Homo sapiens]	Y	17	1DUX-C00	-	-	-	-	-	-	-	-	-
1DUX	F	P19419	gi|7767066|pdb|1DUX|F	63.41	76.83	82	29	1	5	85	5	86	1e-30	107	15.4	1.2	81	86	63	'MOLECULE: DNA (5''- '	NP_001244097.1	NP_001244097	63.41	76.83	82	29	1	5	85	5	86	7e-28	106	IPR011991; IPR000418	Y	ELK1	9606 [Organism: human] [Scientific Name: Homo sapiens]	Y	17	1DUX-C00	-	-	-	-	-	-	-	-	-
1DUX	F	P19419	gi|7767066|pdb|1DUX|F	63.41	76.83	82	29	1	5	85	5	86	1e-30	107	15.4	1.2	81	86	63	'MOLECULE: DNA (5''- '	NP_001244097.1	NP_001244097	63.41	76.83	82	29	1	5	85	5	86	7e-28	106	IPR011991; IPR000418	Y	ELK1	9606 [Organism: human] [Scientific Name: Homo sapiens]	Y	17	1DUX-C00	-	-	-	-	-	-	-	-	-
1DUX	F	P19419	gi|7767066|pdb|1DUX|F	63.41	76.83	82	29	1	5	85	5	86	1e-30	107	15.4	1.2	81	86	63	'MOLECULE: DNA (5''- '	NP_001244097.1	NP_001244097	63.41	76.83	82	29	1	5	85	5	86	7e-28	106	IPR011991; IPR000418	Y	ELK1	9606 [Organism: human] [Scientific Name: Homo sapiens]	Y	17	1DUX-C00	-	-	-	-	-	-	-	-	-
1DUX	F	P19419	gi|7767066|pdb|1DUX|F	63.41	76.83	82	29	1	5	85	5	86	1e-30	107	15.4	1.2	81	86	63	'MOLECULE: DNA (5''- '	NP_001244097.1	NP_001244097	63.41	76.83	82	29	1	5	85	5	86	7e-28	106	IPR011991; IPR000418	Y	ELK1	9606 [Organism: human] [Scientific Name: Homo sapiens]	Y	17	1DUX-C00	-	-	-	-	-	-	-	-	-
1DUX	F	P19419	gi|7767066|pdb|1DUX|F	63.41	76.83	82	29	1	5	85	5	86	1e-30	107	15.4	1.2	81	86	63	'MOLECULE: DNA (5''- '	NP_001244097.1	NP_001244097	63.41	76.83	82	29	1	5	85	5	86	7e-28	106	IPR011991; IPR000418	Y	ELK1	9606 [Organism: human] [Scientific Name: Homo sapiens]	Y	17	1DUX-C00	-	-	-	-	-	-	-	-	-
1DUX	F	P19419	gi|7767066|pdb|1DUX|F	63.41	76.83	82	29	1	5	85	5	86	1e-30	107	15.4	1.2	81	86	63	'MOLECULE: DNA (5''- '	NP_001244097.1	NP_001244097	63.41	76.83	82	29	1	5	85	5	86	7e-28	106	IPR011991; IPR000418	Y	ELK1	9606 [Organism: human] [Scientific Name: Homo sapiens]	Y	17	1DUX-C00	-	-	-	-	-	-	-	-	-
1DUX	F	P19419	gi|7767066|pdb|1DUX|F	63.41	76.83	82	29	1	5	85	5	86	1e-30	107	15.4	1.2	81	86	63	'MOLECULE: DNA (5''- '	NP_001244097.1	NP_001244097	63.41	76.83	82	29	1	5	85	5	86	7e-28	106	IPR011991; IPR000418	Y	ELK1	9606 [Organism: human] [Scientific Name: Homo sapiens]	Y	17	1DUX-C00	-	-	-	-	-	-	-	-	-
1DUX	F	P19419	gi|7767066|pdb|1DUX|F	63.41	76.83	82	29	1	5	85	5	86	1e-30	107	15.4	1.2	81	86	63	'MOLECULE: DNA (5''- '	NP_001244097.1	NP_001244097	63.41	76.83	82	29	1	5	85	5	86	7e-28	106	IPR011991; IPR000418	Y	ELK1	9606 [Organism: human] [Scientific Name: Homo sapiens]	Y	17	1DUX-C00	-	-	-	-	-	-	-	-	-
1DUX	F	P19419	gi|7767066|pdb|1DUX|F	63.41	76.83	82	29	1	5	85	5	86	1e-30	107	15.4	1.2	81	86	63	'MOLECULE: DNA (5''- '	NP_001244097.1	NP_001244097	63.41	76.83	82	29	1	5	85	5	86	7e-28	106	IPR011991; IPR000418	Y	ELK1	9606 [Organism: human] [Scientific Name: Homo sapiens]	Y	17	1DUX-C00	-	-	-	-	-	-	-	-	-
1DUX	F	P19419	gi|7767066|pdb|1DUX|F	63.41	76.83	82	29	1	5	85	5	86	1e-30	107	15.4	1.2	81	86	63	'MOLECULE: DNA (5''- '	NP_001244097.1	NP_001244097	63.41	76.83	82	29	1	5	85	5	86	7e-28	106	IPR011991; IPR000418	Y	ELK1	9606 [Organism: human] [Scientific Name: Homo sapiens]	Y	17	1DUX-C00	-	-	-	-	-	-	-	-	-
1DUX	F	P19419	gi|7767066|pdb|1DUX|F	63.41	76.83	82	29	1	5	85	5	86	1e-30	107	15.4	1.2	81	86	63	'MOLECULE: DNA (5''- '	NP_001244097.1	NP_001244097	63.41	76.83	82	29	1	5	85	5	86	7e-28	106	IPR011991; IPR000418	Y	ELK1	9606 [Organism: human] [Scientific Name: Homo sapiens]	Y	17	1DUX-C00	-	-	-	-	-	-	-	-	-
1DUX	F	P19419	gi|7767066|pdb|1DUX|F	63.41	76.83	82	29	1	5	85	5	86	1e-30	107	15.4	1.2	81	86	63	'MOLECULE: DNA (5''- '	NP_001244097.1	NP_001244097	63.41	76.83	82	29	1	5	85	5	86	7e-28	106	IPR011991; IPR000418	Y	ELK1	9606 [Organism: human] [Scientific Name: Homo sapiens]	Y	17	1DUX-C00	-	-	-	-	-	-	-	-	-
1DUX	F	P19419	gi|7767066|pdb|1DUX|F	63.41	76.83	82	29	1	5	85	5	86	1e-30	107	15.4	1.2	81	86	63	'MOLECULE: DNA (5''- '	NP_001244097.1	NP_001244097	63.41	76.83	82	29	1	5	85	5	86	7e-28	106	IPR011991; IPR000418	Y	ELK1	9606 [Organism: human] [Scientific Name: Homo sapiens]	Y	17	1DUX-C00	-	-	-	-	-	-	-	-	-
1DUX	F	P19419	gi|7767066|pdb|1DUX|F	63.41	76.83	82	29	1	5	85	5	86	1e-30	107	15.4	1.2	81	86	63	'MOLECULE: DNA (5''- '	NP_001244097.1	NP_001244097	63.41	76.83	82	29	1	5	85	5	86	7e-28	106	IPR011991; IPR000418	Y	ELK1	9606 [Organism: human] [Scientific Name: Homo sapiens]	Y	17	1DUX-C00	-	-	-	-	-	-	-	-	-
1DUX	F	P19419	gi|7767066|pdb|1DUX|F	63.41	76.83	82	29	1	5	85	5	86	1e-30	107	15.4	1.2	81	86	63	'MOLECULE: DNA (5''- '	NP_001244097.1	NP_001244097	63.41	76.83	82	29	1	5	85	5	86	7e-28	106	IPR011991; IPR000418	Y	ELK1	9606 [Organism: human] [Scientific Name: Homo sapiens]	Y	17	1DUX-C00	-	-	-	-	-	-	-	-	-
1DUX	F	P19419	gi|7767066|pdb|1DUX|F	63.41	76.83	82	29	1	5	85	5	86	1e-30	107	15.4	1.2	81	86	63	'MOLECULE: DNA (5''- '	NP_001244097.1	NP_001244097	63.41	76.83	82	29	1	5	85	5	86	7e-28	106	IPR011991; IPR000418	Y	ELK1	9606 [Organism: human] [Scientific Name: Homo sapiens]	Y	17	1DUX-C00	-	-	-	-	-	-	-	-	-
1DUX	F	P19419	gi|7767066|pdb|1DUX|F	63.41	76.83	82	29	1	5	85	5	86	1e-30	107	15.4	1.2	81	86	63	'MOLECULE: DNA (5''- '	NP_001244097.1	NP_001244097	63.41	76.83	82	29	1	5	85	5	86	7e-28	106	IPR011991; IPR000418	Y	ELK1	9606 [Organism: human] [Scientific Name: Homo sapiens]	Y	17	1DUX-C00	-	-	-	-	-	-	-	-	-
1DUX	F	P19419	gi|7767066|pdb|1DUX|F	63.41	76.83	82	29	1	5	85	5	86	1e-30	107	15.4	1.2	81	86	63	'MOLECULE: DNA (5''- '	NP_001244097.1	NP_001244097	63.41	76.83	82	29	1	5	85	5	86	7e-28	106	IPR011991; IPR000418	Y	ELK1	9606 [Organism: human] [Scientific Name: Homo sapiens]	Y	17	1DUX-C00	-	-	-	-	-	-	-	-	-
1DUX	F	P19419	gi|7767066|pdb|1DUX|F	63.41	76.83	82	29	1	5	85	5	86	1e-30	107	15.4	1.2	81	86	63	'MOLECULE: DNA (5''- '	NP_001244097.1	NP_001244097	63.41	76.83	82	29	1	5	85	5	86	7e-28	106	IPR011991; IPR000418	Y	ELK1	9606 [Organism: human] [Scientific Name: Homo sapiens]	Y	17	1DUX-C00	-	-	-	-	-	-	-	-	-
1DUX	F	P19419	gi|7767066|pdb|1DUX|F	63.41	76.83	82	29	1	5	85	5	86	1e-30	107	15.4	1.2	81	86	63	'MOLECULE: DNA (5''- '	NP_001244097.1	NP_001244097	63.41	76.83	82	29	1	5	85	5	86	7e-28	106	IPR011991; IPR000418	Y	ELK1	9606 [Organism: human] [Scientific Name: Homo sapiens]	Y	17	1DUX-C00	-	-	-	-	-	-	-	-	-
1DUX	F	P19419	gi|7767066|pdb|1DUX|F	63.41	76.83	82	29	1	5	85	5	86	1e-30	107	15.4	1.2	81	86	63	'MOLECULE: DNA (5''- '	NP_001244097.1	NP_001244097	63.41	76.83	82	29	1	5	85	5	86	7e-28	106	IPR011991; IPR000418	Y	ELK1	9606 [Organism: human] [Scientific Name: Homo sapiens]	Y	17	1DUX-C00	-	-	-	-	-	-	-	-	-
1DUX	F	P19419	gi|7767066|pdb|1DUX|F	63.41	76.83	82	29	1	5	85	5	86	1e-30	107	15.4	1.2	81	86	63	'MOLECULE: DNA (5''- '	NP_001244097.1	NP_001244097	63.41	76.83	82	29	1	5	85	5	86	7e-28	106	IPR011991; IPR000418	Y	ELK1	9606 [Organism: human] [Scientific Name: Homo sapiens]	Y	17	1DUX-C00	-	-	-	-	-	-	-	-	-
1DUX	F	P19419	gi|7767066|pdb|1DUX|F	63.41	76.83	82	29	1	5	85	5	86	1e-30	107	15.4	1.2	81	86	63	'MOLECULE: DNA (5''- '	NP_001244097.1	NP_001244097	63.41	76.83	82	29	1	5	85	5	86	7e-28	106	IPR011991; IPR000418	Y	ELK1	9606 [Organism: human] [Scientific Name: Homo sapiens]	Y	17	1DUX-C00	-	-	-	-	-	-	-	-	-
1DUX	F	P19419	gi|7767066|pdb|1DUX|F	63.41	76.83	82	29	1	5	85	5	86	1e-30	107	15.4	1.2	81	86	63	'MOLECULE: DNA (5''- '	NP_001244097.1	NP_001244097	63.41	76.83	82	29	1	5	85	5	86	7e-28	106	IPR011991; IPR000418	Y	ELK1	9606 [Organism: human] [Scientific Name: Homo sapiens]	Y	17	1DUX-C00	-	-	-	-	-	-	-	-	-
1DUX	F	P19419	gi|7767066|pdb|1DUX|F	63.41	76.83	82	29	1	5	85	5	86	1e-30	107	15.4	1.2	81	86	63	'MOLECULE: DNA (5''- '	NP_001244097.1	NP_001244097	63.41	76.83	82	29	1	5	85	5	86	7e-28	106	IPR011991; IPR000418	Y	ELK1	9606 [Organism: human] [Scientific Name: Homo sapiens]	Y	17	1DUX-C00	-	-	-	-	-	-	-	-	-
1DUX	F	P19419	gi|7767066|pdb|1DUX|F	63.41	76.83	82	29	1	5	85	5	86	1e-30	107	15.4	1.2	81	86	63	'MOLECULE: DNA (5''- '	NP_001244097.1	NP_001244097	63.41	76.83	82	29	1	5	85	5	86	7e-28	106	IPR011991; IPR000418	Y	ELK1	9606 [Organism: human] [Scientific Name: Homo sapiens]	Y	17	1DUX-C00	-	-	-	-	-	-	-	-	-
1DUX	F	P19419	gi|7767066|pdb|1DUX|F	63.41	76.83	82	29	1	5	85	5	86	1e-30	107	15.4	1.2	81	86	63	'MOLECULE: DNA (5''- '	NP_001244097.1	NP_001244097	63.41	76.83	82	29	1	5	85	5	86	7e-28	106	IPR011991; IPR000418	Y	ELK1	9606 [Organism: human] [Scientific Name: Homo sapiens]	Y	17	1DUX-C00	-	-	-	-	-	-	-	-	-
1DUX	F	P19419	gi|7767066|pdb|1DUX|F	63.41	76.83	82	29	1	5	85	5	86	1e-30	107	15.4	1.2	81	86	63	'MOLECULE: DNA (5''- '	NP_001244097.1	NP_001244097	63.41	76.83	82	29	1	5	85	5	86	7e-28	106	IPR011991; IPR000418	Y	ELK1	9606 [Organism: human] [Scientific Name: Homo sapiens]	Y	17	1DUX-C00	-	-	-	-	-	-	-	-	-
1DUX	F	P19419	gi|7767066|pdb|1DUX|F	63.41	76.83	82	29	1	5	85	5	86	1e-30	107	15.4	1.2	81	86	63	'MOLECULE: DNA (5''- '	NP_001244097.1	NP_001244097	63.41	76.83	82	29	1	5	85	5	86	7e-28	106	IPR011991; IPR000418	Y	ELK1	9606 [Organism: human] [Scientific Name: Homo sapiens]	Y	17	1DUX-C00	-	-	-	-	-	-	-	-	-
1DUX	F	P19419	gi|7767066|pdb|1DUX|F	63.41	76.83	82	29	1	5	85	5	86	1e-30	107	15.4	1.2	81	86	63	'MOLECULE: DNA (5''- '	NP_001244097.1	NP_001244097	63.41	76.83	82	29	1	5	85	5	86	7e-28	106	IPR011991; IPR000418	Y	ELK1	9606 [Organism: human] [Scientific Name: Homo sapiens]	Y	17	1DUX-C00	-	-	-	-	-	-	-	-	-
1DUX	F	P19419	gi|7767066|pdb|1DUX|F	63.41	76.83	82	29	1	5	85	5	86	1e-30	107	15.4	1.2	81	86	63	'MOLECULE: DNA (5''- '	NP_001244097.1	NP_001244097	63.41	76.83	82	29	1	5	85	5	86	7e-28	106	IPR011991; IPR000418	Y	ELK1	9606 [Organism: human] [Scientific Name: Homo sapiens]	Y	17	1DUX-C00	-	-	-	-	-	-	-	-	-
1DUX	F	P19419	gi|7767066|pdb|1DUX|F	63.41	76.83	82	29	1	5	85	5	86	1e-30	107	15.4	1.2	81	86	63	'MOLECULE: DNA (5''- '	NP_001244097.1	NP_001244097	63.41	76.83	82	29	1	5	85	5	86	7e-28	106	IPR011991; IPR000418	Y	ELK1	9606 [Organism: human] [Scientific Name: Homo sapiens]	Y	17	1DUX-C00	-	-	-	-	-	-	-	-	-
1DUX	F	P19419	gi|7767066|pdb|1DUX|F	63.41	76.83	82	29	1	5	85	5	86	1e-30	107	15.4	1.2	81	86	63	'MOLECULE: DNA (5''- '	NP_001244097.1	NP_001244097	63.41	76.83	82	29	1	5	85	5	86	7e-28	106	IPR011991; IPR000418	Y	ELK1	9606 [Organism: human] [Scientific Name: Homo sapiens]	Y	17	1DUX-C00	-	-	-	-	-	-	-	-	-
1DUX	F	P19419	gi|7767066|pdb|1DUX|F	63.41	76.83	82	29	1	5	85	5	86	1e-30	107	15.4	1.2	81	86	63	'MOLECULE: DNA (5''- '	NP_001244097.1	NP_001244097	63.41	76.83	82	29	1	5	85	5	86	7e-28	106	IPR011991; IPR000418	Y	ELK1	9606 [Organism: human] [Scientific Name: Homo sapiens]	Y	17	1DUX-C00	-	-	-	-	-	-	-	-	-
1DUX	F	P19419	gi|7767066|pdb|1DUX|F	63.41	76.83	82	29	1	5	85	5	86	1e-30	107	15.4	1.2	81	86	63	'MOLECULE: DNA (5''- '	NP_001244097.1	NP_001244097	63.41	76.83	82	29	1	5	85	5	86	7e-28	106	IPR011991; IPR000418	Y	ELK1	9606 [Organism: human] [Scientific Name: Homo sapiens]	Y	17	1DUX-C00	-	-	-	-	-	-	-	-	-
1DUX	F	P19419	gi|7767066|pdb|1DUX|F	63.41	76.83	82	29	1	5	85	5	86	1e-30	107	15.4	1.2	81	86	63	'MOLECULE: DNA (5''- '	NP_005220.2	NP_005220	63.41	76.83	82	29	1	5	85	5	86	1e-28	115	IPR011991; IPR000418	Y	ELK1	9606 [Organism: human] [Scientific Name: Homo sapiens]	Y	17	1DUX-C00	-	-	-	-	-	-	-	-	-
1DUX	F	P19419	gi|7767066|pdb|1DUX|F	63.41	76.83	82	29	1	5	85	5	86	1e-30	107	15.4	1.2	81	86	63	'MOLECULE: DNA (5''- '	NP_005220.2	NP_005220	63.41	76.83	82	29	1	5	85	5	86	1e-28	115	IPR011991; IPR000418	Y	ELK1	9606 [Organism: human] [Scientific Name: Homo sapiens]	Y	17	1DUX-C00	-	-	-	-	-	-	-	-	-
1DUX	F	P19419	gi|7767066|pdb|1DUX|F	63.41	76.83	82	29	1	5	85	5	86	1e-30	107	15.4	1.2	81	86	63	'MOLECULE: DNA (5''- '	NP_005220.2	NP_005220	63.41	76.83	82	29	1	5	85	5	86	1e-28	115	IPR011991; IPR000418	Y	ELK1	9606 [Organism: human] [Scientific Name: Homo sapiens]	Y	17	1DUX-C00	-	-	-	-	-	-	-	-	-
1DUX	F	P19419	gi|7767066|pdb|1DUX|F	63.41	76.83	82	29	1	5	85	5	86	1e-30	107	15.4	1.2	81	86	63	'MOLECULE: DNA (5''- '	NP_005220.2	NP_005220	63.41	76.83	82	29	1	5	85	5	86	1e-28	115	IPR011991; IPR000418	Y	ELK1	9606 [Organism: human] [Scientific Name: Homo sapiens]	Y	17	1DUX-C00	-	-	-	-	-	-	-	-	-
1DUX	F	P19419	gi|7767066|pdb|1DUX|F	63.41	76.83	82	29	1	5	85	5	86	1e-30	107	15.4	1.2	81	86	63	'MOLECULE: DNA (5''- '	NP_005220.2	NP_005220	63.41	76.83	82	29	1	5	85	5	86	1e-28	115	IPR011991; IPR000418	Y	ELK1	9606 [Organism: human] [Scientific Name: Homo sapiens]	Y	17	1DUX-C00	-	-	-	-	-	-	-	-	-
1DUX	F	P19419	gi|7767066|pdb|1DUX|F	63.41	76.83	82	29	1	5	85	5	86	1e-30	107	15.4	1.2	81	86	63	'MOLECULE: DNA (5''- '	NP_005220.2	NP_005220	63.41	76.83	82	29	1	5	85	5	86	1e-28	115	IPR011991; IPR000418	Y	ELK1	9606 [Organism: human] [Scientific Name: Homo sapiens]	Y	17	1DUX-C00	-	-	-	-	-	-	-	-	-
1DUX	F	P19419	gi|7767066|pdb|1DUX|F	63.41	76.83	82	29	1	5	85	5	86	1e-30	107	15.4	1.2	81	86	63	'MOLECULE: DNA (5''- '	NP_005220.2	NP_005220	63.41	76.83	82	29	1	5	85	5	86	1e-28	115	IPR011991; IPR000418	Y	ELK1	9606 [Organism: human] [Scientific Name: Homo sapiens]	Y	17	1DUX-C00	-	-	-	-	-	-	-	-	-
1DUX	F	P19419	gi|7767066|pdb|1DUX|F	63.41	76.83	82	29	1	5	85	5	86	1e-30	107	15.4	1.2	81	86	63	'MOLECULE: DNA (5''- '	NP_005220.2	NP_005220	63.41	76.83	82	29	1	5	85	5	86	1e-28	115	IPR011991; IPR000418	Y	ELK1	9606 [Organism: human] [Scientific Name: Homo sapiens]	Y	17	1DUX-C00	-	-	-	-	-	-	-	-	-
1DUX	F	P19419	gi|7767066|pdb|1DUX|F	63.41	76.83	82	29	1	5	85	5	86	1e-30	107	15.4	1.2	81	86	63	'MOLECULE: DNA (5''- '	NP_005220.2	NP_005220	63.41	76.83	82	29	1	5	85	5	86	1e-28	115	IPR011991; IPR000418	Y	ELK1	9606 [Organism: human] [Scientific Name: Homo sapiens]	Y	17	1DUX-C00	-	-	-	-	-	-	-	-	-
1DUX	F	P19419	gi|7767066|pdb|1DUX|F	63.41	76.83	82	29	1	5	85	5	86	1e-30	107	15.4	1.2	81	86	63	'MOLECULE: DNA (5''- '	NP_005220.2	NP_005220	63.41	76.83	82	29	1	5	85	5	86	1e-28	115	IPR011991; IPR000418	Y	ELK1	9606 [Organism: human] [Scientific Name: Homo sapiens]	Y	17	1DUX-C00	-	-	-	-	-	-	-	-	-
1DUX	F	P19419	gi|7767066|pdb|1DUX|F	63.41	76.83	82	29	1	5	85	5	86	1e-30	107	15.4	1.2	81	86	63	'MOLECULE: DNA (5''- '	NP_005220.2	NP_005220	63.41	76.83	82	29	1	5	85	5	86	1e-28	115	IPR011991; IPR000418	Y	ELK1	9606 [Organism: human] [Scientific Name: Homo sapiens]	Y	17	1DUX-C00	-	-	-	-	-	-	-	-	-
1DUX	F	P19419	gi|7767066|pdb|1DUX|F	63.41	76.83	82	29	1	5	85	5	86	1e-30	107	15.4	1.2	81	86	63	'MOLECULE: DNA (5''- '	NP_005220.2	NP_005220	63.41	76.83	82	29	1	5	85	5	86	1e-28	115	IPR011991; IPR000418	Y	ELK1	9606 [Organism: human] [Scientific Name: Homo sapiens]	Y	17	1DUX-C00	-	-	-	-	-	-	-	-	-
1DUX	F	P19419	gi|7767066|pdb|1DUX|F	63.41	76.83	82	29	1	5	85	5	86	1e-30	107	15.4	1.2	81	86	63	'MOLECULE: DNA (5''- '	NP_005220.2	NP_005220	63.41	76.83	82	29	1	5	85	5	86	1e-28	115	IPR011991; IPR000418	Y	ELK1	9606 [Organism: human] [Scientific Name: Homo sapiens]	Y	17	1DUX-C00	-	-	-	-	-	-	-	-	-
1DUX	F	P19419	gi|7767066|pdb|1DUX|F	63.41	76.83	82	29	1	5	85	5	86	1e-30	107	15.4	1.2	81	86	63	'MOLECULE: DNA (5''- '	NP_005220.2	NP_005220	63.41	76.83	82	29	1	5	85	5	86	1e-28	115	IPR011991; IPR000418	Y	ELK1	9606 [Organism: human] [Scientific Name: Homo sapiens]	Y	17	1DUX-C00	-	-	-	-	-	-	-	-	-
1DUX	F	P19419	gi|7767066|pdb|1DUX|F	63.41	76.83	82	29	1	5	85	5	86	1e-30	107	15.4	1.2	81	86	63	'MOLECULE: DNA (5''- '	NP_005220.2	NP_005220	63.41	76.83	82	29	1	5	85	5	86	1e-28	115	IPR011991; IPR000418	Y	ELK1	9606 [Organism: human] [Scientific Name: Homo sapiens]	Y	17	1DUX-C00	-	-	-	-	-	-	-	-	-
1DUX	F	P19419	gi|7767066|pdb|1DUX|F	63.41	76.83	82	29	1	5	85	5	86	1e-30	107	15.4	1.2	81	86	63	'MOLECULE: DNA (5''- '	NP_005220.2	NP_005220	63.41	76.83	82	29	1	5	85	5	86	1e-28	115	IPR011991; IPR000418	Y	ELK1	9606 [Organism: human] [Scientific Name: Homo sapiens]	Y	17	1DUX-C00	-	-	-	-	-	-	-	-	-
1DUX	F	P19419	gi|7767066|pdb|1DUX|F	63.41	76.83	82	29	1	5	85	5	86	1e-30	107	15.4	1.2	81	86	63	'MOLECULE: DNA (5''- '	NP_005220.2	NP_005220	63.41	76.83	82	29	1	5	85	5	86	1e-28	115	IPR011991; IPR000418	Y	ELK1	9606 [Organism: human] [Scientific Name: Homo sapiens]	Y	17	1DUX-C00	-	-	-	-	-	-	-	-	-
1DUX	F	P19419	gi|7767066|pdb|1DUX|F	63.41	76.83	82	29	1	5	85	5	86	1e-30	107	15.4	1.2	81	86	63	'MOLECULE: DNA (5''- '	NP_005220.2	NP_005220	63.41	76.83	82	29	1	5	85	5	86	1e-28	115	IPR011991; IPR000418	Y	ELK1	9606 [Organism: human] [Scientific Name: Homo sapiens]	Y	17	1DUX-C00	-	-	-	-	-	-	-	-	-
1DUX	F	P19419	gi|7767066|pdb|1DUX|F	63.41	76.83	82	29	1	5	85	5	86	1e-30	107	15.4	1.2	81	86	63	'MOLECULE: DNA (5''- '	NP_005220.2	NP_005220	63.41	76.83	82	29	1	5	85	5	86	1e-28	115	IPR011991; IPR000418	Y	ELK1	9606 [Organism: human] [Scientific Name: Homo sapiens]	Y	17	1DUX-C00	-	-	-	-	-	-	-	-	-
1DUX	F	P19419	gi|7767066|pdb|1DUX|F	63.41	76.83	82	29	1	5	85	5	86	1e-30	107	15.4	1.2	81	86	63	'MOLECULE: DNA (5''- '	NP_005220.2	NP_005220	63.41	76.83	82	29	1	5	85	5	86	1e-28	115	IPR011991; IPR000418	Y	ELK1	9606 [Organism: human] [Scientific Name: Homo sapiens]	Y	17	1DUX-C00	-	-	-	-	-	-	-	-	-
1DUX	F	P19419	gi|7767066|pdb|1DUX|F	63.41	76.83	82	29	1	5	85	5	86	1e-30	107	15.4	1.2	81	86	63	'MOLECULE: DNA (5''- '	NP_005220.2	NP_005220	63.41	76.83	82	29	1	5	85	5	86	1e-28	115	IPR011991; IPR000418	Y	ELK1	9606 [Organism: human] [Scientific Name: Homo sapiens]	Y	17	1DUX-C00	-	-	-	-	-	-	-	-	-
1DUX	F	P19419	gi|7767066|pdb|1DUX|F	63.41	76.83	82	29	1	5	85	5	86	1e-30	107	15.4	1.2	81	86	63	'MOLECULE: DNA (5''- '	NP_005220.2	NP_005220	63.41	76.83	82	29	1	5	85	5	86	1e-28	115	IPR011991; IPR000418	Y	ELK1	9606 [Organism: human] [Scientific Name: Homo sapiens]	Y	17	1DUX-C00	-	-	-	-	-	-	-	-	-
1DUX	F	P19419	gi|7767066|pdb|1DUX|F	63.41	76.83	82	29	1	5	85	5	86	1e-30	107	15.4	1.2	81	86	63	'MOLECULE: DNA (5''- '	NP_005220.2	NP_005220	63.41	76.83	82	29	1	5	85	5	86	1e-28	115	IPR011991; IPR000418	Y	ELK1	9606 [Organism: human] [Scientific Name: Homo sapiens]	Y	17	1DUX-C00	-	-	-	-	-	-	-	-	-
1DUX	F	P19419	gi|7767066|pdb|1DUX|F	63.41	76.83	82	29	1	5	85	5	86	1e-30	107	15.4	1.2	81	86	63	'MOLECULE: DNA (5''- '	NP_005220.2	NP_005220	63.41	76.83	82	29	1	5	85	5	86	1e-28	115	IPR011991; IPR000418	Y	ELK1	9606 [Organism: human] [Scientific Name: Homo sapiens]	Y	17	1DUX-C00	-	-	-	-	-	-	-	-	-
1DUX	F	P19419	gi|7767066|pdb|1DUX|F	63.41	76.83	82	29	1	5	85	5	86	1e-30	107	15.4	1.2	81	86	63	'MOLECULE: DNA (5''- '	NP_005220.2	NP_005220	63.41	76.83	82	29	1	5	85	5	86	1e-28	115	IPR011991; IPR000418	Y	ELK1	9606 [Organism: human] [Scientific Name: Homo sapiens]	Y	17	1DUX-C00	-	-	-	-	-	-	-	-	-
1DUX	F	P19419	gi|7767066|pdb|1DUX|F	63.41	76.83	82	29	1	5	85	5	86	1e-30	107	15.4	1.2	81	86	63	'MOLECULE: DNA (5''- '	NP_005220.2	NP_005220	63.41	76.83	82	29	1	5	85	5	86	1e-28	115	IPR011991; IPR000418	Y	ELK1	9606 [Organism: human] [Scientific Name: Homo sapiens]	Y	17	1DUX-C00	-	-	-	-	-	-	-	-	-
1DUX	F	P19419	gi|7767066|pdb|1DUX|F	63.41	76.83	82	29	1	5	85	5	86	1e-30	107	15.4	1.2	81	86	63	'MOLECULE: DNA (5''- '	NP_005220.2	NP_005220	63.41	76.83	82	29	1	5	85	5	86	1e-28	115	IPR011991; IPR000418	Y	ELK1	9606 [Organism: human] [Scientific Name: Homo sapiens]	Y	17	1DUX-C00	-	-	-	-	-	-	-	-	-
1DUX	F	P19419	gi|7767066|pdb|1DUX|F	63.41	76.83	82	29	1	5	85	5	86	1e-30	107	15.4	1.2	81	86	63	'MOLECULE: DNA (5''- '	NP_005220.2	NP_005220	63.41	76.83	82	29	1	5	85	5	86	1e-28	115	IPR011991; IPR000418	Y	ELK1	9606 [Organism: human] [Scientific Name: Homo sapiens]	Y	17	1DUX-C00	-	-	-	-	-	-	-	-	-
1DUX	F	P19419	gi|7767066|pdb|1DUX|F	63.41	76.83	82	29	1	5	85	5	86	1e-30	107	15.4	1.2	81	86	63	'MOLECULE: DNA (5''- '	NP_005220.2	NP_005220	63.41	76.83	82	29	1	5	85	5	86	1e-28	115	IPR011991; IPR000418	Y	ELK1	9606 [Organism: human] [Scientific Name: Homo sapiens]	Y	17	1DUX-C00	-	-	-	-	-	-	-	-	-
1DUX	F	P19419	gi|7767066|pdb|1DUX|F	63.41	76.83	82	29	1	5	85	5	86	1e-30	107	15.4	1.2	81	86	63	'MOLECULE: DNA (5''- '	NP_005220.2	NP_005220	63.41	76.83	82	29	1	5	85	5	86	1e-28	115	IPR011991; IPR000418	Y	ELK1	9606 [Organism: human] [Scientific Name: Homo sapiens]	Y	17	1DUX-C00	-	-	-	-	-	-	-	-	-
1DUX	F	P19419	gi|7767066|pdb|1DUX|F	63.41	76.83	82	29	1	5	85	5	86	1e-30	107	15.4	1.2	81	86	63	'MOLECULE: DNA (5''- '	NP_005220.2	NP_005220	63.41	76.83	82	29	1	5	85	5	86	1e-28	115	IPR011991; IPR000418	Y	ELK1	9606 [Organism: human] [Scientific Name: Homo sapiens]	Y	17	1DUX-C00	-	-	-	-	-	-	-	-	-
1DUX	F	P19419	gi|7767066|pdb|1DUX|F	63.41	76.83	82	29	1	5	85	5	86	1e-30	107	15.4	1.2	81	86	63	'MOLECULE: DNA (5''- '	NP_005220.2	NP_005220	63.41	76.83	82	29	1	5	85	5	86	1e-28	115	IPR011991; IPR000418	Y	ELK1	9606 [Organism: human] [Scientific Name: Homo sapiens]	Y	17	1DUX-C00	-	-	-	-	-	-	-	-	-
1DUX	F	P19419	gi|7767066|pdb|1DUX|F	63.41	76.83	82	29	1	5	85	5	86	1e-30	107	15.4	1.2	81	86	63	'MOLECULE: DNA (5''- '	NP_005220.2	NP_005220	63.41	76.83	82	29	1	5	85	5	86	1e-28	115	IPR011991; IPR000418	Y	ELK1	9606 [Organism: human] [Scientific Name: Homo sapiens]	Y	17	1DUX-C00	-	-	-	-	-	-	-	-	-
1DUX	F	P19419	gi|7767066|pdb|1DUX|F	63.41	76.83	82	29	1	5	85	5	86	1e-30	107	15.4	1.2	81	86	63	'MOLECULE: DNA (5''- '	NP_005220.2	NP_005220	63.41	76.83	82	29	1	5	85	5	86	1e-28	115	IPR011991; IPR000418	Y	ELK1	9606 [Organism: human] [Scientific Name: Homo sapiens]	Y	17	1DUX-C00	-	-	-	-	-	-	-	-	-
1DUX	F	P19419	gi|7767066|pdb|1DUX|F	63.41	76.83	82	29	1	5	85	5	86	1e-30	107	15.4	1.2	81	86	63	'MOLECULE: DNA (5''- '	NP_005220.2	NP_005220	63.41	76.83	82	29	1	5	85	5	86	1e-28	115	IPR011991; IPR000418	Y	ELK1	9606 [Organism: human] [Scientific Name: Homo sapiens]	Y	17	1DUX-C00	-	-	-	-	-	-	-	-	-
1DUX	F	P19419	gi|7767066|pdb|1DUX|F	63.41	76.83	82	29	1	5	85	5	86	1e-30	107	15.4	1.2	81	86	63	'MOLECULE: DNA (5''- '	NP_005220.2	NP_005220	63.41	76.83	82	29	1	5	85	5	86	1e-28	115	IPR011991; IPR000418	Y	ELK1	9606 [Organism: human] [Scientific Name: Homo sapiens]	Y	17	1DUX-C00	-	-	-	-	-	-	-	-	-
1DUX	F	P19419	gi|7767066|pdb|1DUX|F	63.41	76.83	82	29	1	5	85	5	86	1e-30	107	15.4	1.2	81	86	63	'MOLECULE: DNA (5''- '	NP_005220.2	NP_005220	63.41	76.83	82	29	1	5	85	5	86	1e-28	115	IPR011991; IPR000418	Y	ELK1	9606 [Organism: human] [Scientific Name: Homo sapiens]	Y	17	1DUX-C00	-	-	-	-	-	-	-	-	-
1DUX	F	P19419	gi|7767066|pdb|1DUX|F	63.41	76.83	82	29	1	5	85	5	86	1e-30	107	15.4	1.2	81	86	63	'MOLECULE: DNA (5''- '	NP_005220.2	NP_005220	63.41	76.83	82	29	1	5	85	5	86	1e-28	115	IPR011991; IPR000418	Y	ELK1	9606 [Organism: human] [Scientific Name: Homo sapiens]	Y	17	1DUX-C00	-	-	-	-	-	-	-	-	-
1DUX	F	P19419	gi|7767066|pdb|1DUX|F	63.41	76.83	82	29	1	5	85	5	86	1e-30	107	15.4	1.2	81	86	63	'MOLECULE: DNA (5''- '	NP_005220.2	NP_005220	63.41	76.83	82	29	1	5	85	5	86	1e-28	115	IPR011991; IPR000418	Y	ELK1	9606 [Organism: human] [Scientific Name: Homo sapiens]	Y	17	1DUX-C00	-	-	-	-	-	-	-	-	-
1DUX	F	P19419	gi|7767066|pdb|1DUX|F	63.41	76.83	82	29	1	5	85	5	86	1e-30	107	15.4	1.2	81	86	63	'MOLECULE: DNA (5''- '	NP_005220.2	NP_005220	63.41	76.83	82	29	1	5	85	5	86	1e-28	115	IPR011991; IPR000418	Y	ELK1	9606 [Organism: human] [Scientific Name: Homo sapiens]	Y	17	1DUX-C00	-	-	-	-	-	-	-	-	-
1DUX	F	P19419	gi|7767066|pdb|1DUX|F	63.41	76.83	82	29	1	5	85	5	86	1e-30	107	15.4	1.2	81	86	63	'MOLECULE: DNA (5''- '	NP_005220.2	NP_005220	63.41	76.83	82	29	1	5	85	5	86	1e-28	115	IPR011991; IPR000418	Y	ELK1	9606 [Organism: human] [Scientific Name: Homo sapiens]	Y	17	1DUX-C00	-	-	-	-	-	-	-	-	-
1DUX	F	P19419	gi|7767066|pdb|1DUX|F	63.41	76.83	82	29	1	5	85	5	86	1e-30	107	15.4	1.2	81	86	63	'MOLECULE: DNA (5''- '	NP_005220.2	NP_005220	63.41	76.83	82	29	1	5	85	5	86	1e-28	115	IPR011991; IPR000418	Y	ELK1	9606 [Organism: human] [Scientific Name: Homo sapiens]	Y	17	1DUX-C00	-	-	-	-	-	-	-	-	-
1DUX	F	P19419	gi|7767066|pdb|1DUX|F	63.41	76.83	82	29	1	5	85	5	86	1e-30	107	15.4	1.2	81	86	63	'MOLECULE: DNA (5''- '	NP_005220.2	NP_005220	63.41	76.83	82	29	1	5	85	5	86	1e-28	115	IPR011991; IPR000418	Y	ELK1	9606 [Organism: human] [Scientific Name: Homo sapiens]	Y	17	1DUX-C00	-	-	-	-	-	-	-	-	-
1DUX	F	P19419	gi|7767066|pdb|1DUX|F	63.41	76.83	82	29	1	5	85	5	86	1e-30	107	15.4	1.2	81	86	63	'MOLECULE: DNA (5''- '	NP_005220.2	NP_005220	63.41	76.83	82	29	1	5	85	5	86	1e-28	115	IPR011991; IPR000418	Y	ELK1	9606 [Organism: human] [Scientific Name: Homo sapiens]	Y	17	1DUX-C00	-	-	-	-	-	-	-	-	-
1DUX	F	P19419	gi|7767066|pdb|1DUX|F	63.41	76.83	82	29	1	5	85	5	86	1e-30	107	15.4	1.2	81	86	63	'MOLECULE: DNA (5''- '	NP_005220.2	NP_005220	63.41	76.83	82	29	1	5	85	5	86	1e-28	115	IPR011991; IPR000418	Y	ELK1	9606 [Organism: human] [Scientific Name: Homo sapiens]	Y	17	1DUX-C00	-	-	-	-	-	-	-	-	-
1DUX	F	P19419	gi|7767066|pdb|1DUX|F	63.41	76.83	82	29	1	5	85	5	86	1e-30	107	15.4	1.2	81	86	63	'MOLECULE: DNA (5''- '	NP_005220.2	NP_005220	63.41	76.83	82	29	1	5	85	5	86	1e-28	115	IPR011991; IPR000418	Y	ELK1	9606 [Organism: human] [Scientific Name: Homo sapiens]	Y	17	1DUX-C00	-	-	-	-	-	-	-	-	-
1DUX	F	P19419	gi|7767066|pdb|1DUX|F	63.41	76.83	82	29	1	5	85	5	86	1e-30	107	15.4	1.2	81	86	63	'MOLECULE: DNA (5''- '	NP_005220.2	NP_005220	63.41	76.83	82	29	1	5	85	5	86	1e-28	115	IPR011991; IPR000418	Y	ELK1	9606 [Organism: human] [Scientific Name: Homo sapiens]	Y	17	1DUX-C00	-	-	-	-	-	-	-	-	-
1DUX	F	P19419	gi|7767066|pdb|1DUX|F	63.41	76.83	82	29	1	5	85	5	86	1e-30	107	15.4	1.2	81	86	63	'MOLECULE: DNA (5''- '	NP_005220.2	NP_005220	63.41	76.83	82	29	1	5	85	5	86	1e-28	115	IPR011991; IPR000418	Y	ELK1	9606 [Organism: human] [Scientific Name: Homo sapiens]	Y	17	1DUX-C00	-	-	-	-	-	-	-	-	-
1DUX	F	P19419	gi|7767066|pdb|1DUX|F	63.41	76.83	82	29	1	5	85	5	86	1e-30	107	15.4	1.2	81	86	63	'MOLECULE: DNA (5''- '	NP_005220.2	NP_005220	63.41	76.83	82	29	1	5	85	5	86	1e-28	115	IPR011991; IPR000418	Y	ELK1	9606 [Organism: human] [Scientific Name: Homo sapiens]	Y	17	1DUX-C00	-	-	-	-	-	-	-	-	-
1DUX	C	P19419	gi|7767065|pdb|1DUX|C	63.41	76.83	82	29	1	5	85	5	86	1e-30	107	15.4	1.2	81	86	63	'MOLECULE: DNA (5''- '	NP_001107595.1	NP_001107595	63.41	76.83	82	29	1	5	85	5	86	1e-28	115	IPR011991; IPR000418	Y	ELK1	9606 [Organism: human] [Scientific Name: Homo sapiens]	Y	17	1DUX-C00	3	65.99	72.78	0.7719	0.8512	0.8946	1.16	81	80
1DUX	C	P19419	gi|7767065|pdb|1DUX|C	63.41	76.83	82	29	1	5	85	5	86	1e-30	107	15.4	1.2	81	86	63	'MOLECULE: DNA (5''- '	NP_001244097.1	NP_001244097	63.41	76.83	82	29	1	5	85	5	86	7e-28	106	IPR011991; IPR000418	Y	ELK1	9606 [Organism: human] [Scientific Name: Homo sapiens]	Y	17	1DUX-C00	3	65.99	72.78	0.7719	0.8512	0.8946	1.16	81	80
1DUX	C	P19419	gi|7767065|pdb|1DUX|C	63.41	76.83	82	29	1	5	85	5	86	1e-30	107	15.4	1.2	81	86	63	'MOLECULE: DNA (5''- '	NP_001244097.1	NP_001244097	63.41	76.83	82	29	1	5	85	5	86	7e-28	106	IPR011991; IPR000418	Y	ELK1	9606 [Organism: human] [Scientific Name: Homo sapiens]	Y	17	1DUX-C00	3	65.99	72.78	0.7719	0.8512	0.8946	1.16	81	80
1DUX	C	P19419	gi|7767065|pdb|1DUX|C	63.41	76.83	82	29	1	5	85	5	86	1e-30	107	15.4	1.2	81	86	63	'MOLECULE: DNA (5''- '	NP_001244097.1	NP_001244097	63.41	76.83	82	29	1	5	85	5	86	7e-28	106	IPR011991; IPR000418	Y	ELK1	9606 [Organism: human] [Scientific Name: Homo sapiens]	Y	17	1DUX-C00	3	65.99	72.78	0.7719	0.8512	0.8946	1.16	81	80
1DUX	C	P19419	gi|7767065|pdb|1DUX|C	63.41	76.83	82	29	1	5	85	5	86	1e-30	107	15.4	1.2	81	86	63	'MOLECULE: DNA (5''- '	NP_001244097.1	NP_001244097	63.41	76.83	82	29	1	5	85	5	86	7e-28	106	IPR011991; IPR000418	Y	ELK1	9606 [Organism: human] [Scientific Name: Homo sapiens]	Y	17	1DUX-C00	3	65.99	72.78	0.7719	0.8512	0.8946	1.16	81	80
1DUX	C	P19419	gi|7767065|pdb|1DUX|C	63.41	76.83	82	29	1	5	85	5	86	1e-30	107	15.4	1.2	81	86	63	'MOLECULE: DNA (5''- '	NP_001244097.1	NP_001244097	63.41	76.83	82	29	1	5	85	5	86	7e-28	106	IPR011991; IPR000418	Y	ELK1	9606 [Organism: human] [Scientific Name: Homo sapiens]	Y	17	1DUX-C00	3	65.99	72.78	0.7719	0.8512	0.8946	1.16	81	80
1DUX	C	P19419	gi|7767065|pdb|1DUX|C	63.41	76.83	82	29	1	5	85	5	86	1e-30	107	15.4	1.2	81	86	63	'MOLECULE: DNA (5''- '	NP_001244097.1	NP_001244097	63.41	76.83	82	29	1	5	85	5	86	7e-28	106	IPR011991; IPR000418	Y	ELK1	9606 [Organism: human] [Scientific Name: Homo sapiens]	Y	17	1DUX-C00	3	65.99	72.78	0.7719	0.8512	0.8946	1.16	81	80
1DUX	C	P19419	gi|7767065|pdb|1DUX|C	63.41	76.83	82	29	1	5	85	5	86	1e-30	107	15.4	1.2	81	86	63	'MOLECULE: DNA (5''- '	NP_001244097.1	NP_001244097	63.41	76.83	82	29	1	5	85	5	86	7e-28	106	IPR011991; IPR000418	Y	ELK1	9606 [Organism: human] [Scientific Name: Homo sapiens]	Y	17	1DUX-C00	3	65.99	72.78	0.7719	0.8512	0.8946	1.16	81	80
1DUX	C	P19419	gi|7767065|pdb|1DUX|C	63.41	76.83	82	29	1	5	85	5	86	1e-30	107	15.4	1.2	81	86	63	'MOLECULE: DNA (5''- '	NP_001244097.1	NP_001244097	63.41	76.83	82	29	1	5	85	5	86	7e-28	106	IPR011991; IPR000418	Y	ELK1	9606 [Organism: human] [Scientific Name: Homo sapiens]	Y	17	1DUX-C00	3	65.99	72.78	0.7719	0.8512	0.8946	1.16	81	80
1DUX	C	P19419	gi|7767065|pdb|1DUX|C	63.41	76.83	82	29	1	5	85	5	86	1e-30	107	15.4	1.2	81	86	63	'MOLECULE: DNA (5''- '	NP_001244097.1	NP_001244097	63.41	76.83	82	29	1	5	85	5	86	7e-28	106	IPR011991; IPR000418	Y	ELK1	9606 [Organism: human] [Scientific Name: Homo sapiens]	Y	17	1DUX-C00	3	65.99	72.78	0.7719	0.8512	0.8946	1.16	81	80
1DUX	C	P19419	gi|7767065|pdb|1DUX|C	63.41	76.83	82	29	1	5	85	5	86	1e-30	107	15.4	1.2	81	86	63	'MOLECULE: DNA (5''- '	NP_001244097.1	NP_001244097	63.41	76.83	82	29	1	5	85	5	86	7e-28	106	IPR011991; IPR000418	Y	ELK1	9606 [Organism: human] [Scientific Name: Homo sapiens]	Y	17	1DUX-C00	3	65.99	72.78	0.7719	0.8512	0.8946	1.16	81	80
1DUX	C	P19419	gi|7767065|pdb|1DUX|C	63.41	76.83	82	29	1	5	85	5	86	1e-30	107	15.4	1.2	81	86	63	'MOLECULE: DNA (5''- '	NP_001244097.1	NP_001244097	63.41	76.83	82	29	1	5	85	5	86	7e-28	106	IPR011991; IPR000418	Y	ELK1	9606 [Organism: human] [Scientific Name: Homo sapiens]	Y	17	1DUX-C00	3	65.99	72.78	0.7719	0.8512	0.8946	1.16	81	80
1DUX	C	P19419	gi|7767065|pdb|1DUX|C	63.41	76.83	82	29	1	5	85	5	86	1e-30	107	15.4	1.2	81	86	63	'MOLECULE: DNA (5''- '	NP_001244097.1	NP_001244097	63.41	76.83	82	29	1	5	85	5	86	7e-28	106	IPR011991; IPR000418	Y	ELK1	9606 [Organism: human] [Scientific Name: Homo sapiens]	Y	17	1DUX-C00	3	65.99	72.78	0.7719	0.8512	0.8946	1.16	81	80
1DUX	C	P19419	gi|7767065|pdb|1DUX|C	63.41	76.83	82	29	1	5	85	5	86	1e-30	107	15.4	1.2	81	86	63	'MOLECULE: DNA (5''- '	NP_001244097.1	NP_001244097	63.41	76.83	82	29	1	5	85	5	86	7e-28	106	IPR011991; IPR000418	Y	ELK1	9606 [Organism: human] [Scientific Name: Homo sapiens]	Y	17	1DUX-C00	3	65.99	72.78	0.7719	0.8512	0.8946	1.16	81	80
1DUX	C	P19419	gi|7767065|pdb|1DUX|C	63.41	76.83	82	29	1	5	85	5	86	1e-30	107	15.4	1.2	81	86	63	'MOLECULE: DNA (5''- '	NP_001244097.1	NP_001244097	63.41	76.83	82	29	1	5	85	5	86	7e-28	106	IPR011991; IPR000418	Y	ELK1	9606 [Organism: human] [Scientific Name: Homo sapiens]	Y	17	1DUX-C00	3	65.99	72.78	0.7719	0.8512	0.8946	1.16	81	80
1DUX	C	P19419	gi|7767065|pdb|1DUX|C	63.41	76.83	82	29	1	5	85	5	86	1e-30	107	15.4	1.2	81	86	63	'MOLECULE: DNA (5''- '	NP_001244097.1	NP_001244097	63.41	76.83	82	29	1	5	85	5	86	7e-28	106	IPR011991; IPR000418	Y	ELK1	9606 [Organism: human] [Scientific Name: Homo sapiens]	Y	17	1DUX-C00	3	65.99	72.78	0.7719	0.8512	0.8946	1.16	81	80
1DUX	C	P19419	gi|7767065|pdb|1DUX|C	63.41	76.83	82	29	1	5	85	5	86	1e-30	107	15.4	1.2	81	86	63	'MOLECULE: DNA (5''- '	NP_001244097.1	NP_001244097	63.41	76.83	82	29	1	5	85	5	86	7e-28	106	IPR011991; IPR000418	Y	ELK1	9606 [Organism: human] [Scientific Name: Homo sapiens]	Y	17	1DUX-C00	3	65.99	72.78	0.7719	0.8512	0.8946	1.16	81	80
1DUX	C	P19419	gi|7767065|pdb|1DUX|C	63.41	76.83	82	29	1	5	85	5	86	1e-30	107	15.4	1.2	81	86	63	'MOLECULE: DNA (5''- '	NP_001244097.1	NP_001244097	63.41	76.83	82	29	1	5	85	5	86	7e-28	106	IPR011991; IPR000418	Y	ELK1	9606 [Organism: human] [Scientific Name: Homo sapiens]	Y	17	1DUX-C00	3	65.99	72.78	0.7719	0.8512	0.8946	1.16	81	80
1DUX	C	P19419	gi|7767065|pdb|1DUX|C	63.41	76.83	82	29	1	5	85	5	86	1e-30	107	15.4	1.2	81	86	63	'MOLECULE: DNA (5''- '	NP_001244097.1	NP_001244097	63.41	76.83	82	29	1	5	85	5	86	7e-28	106	IPR011991; IPR000418	Y	ELK1	9606 [Organism: human] [Scientific Name: Homo sapiens]	Y	17	1DUX-C00	3	65.99	72.78	0.7719	0.8512	0.8946	1.16	81	80
1DUX	C	P19419	gi|7767065|pdb|1DUX|C	63.41	76.83	82	29	1	5	85	5	86	1e-30	107	15.4	1.2	81	86	63	'MOLECULE: DNA (5''- '	NP_001244097.1	NP_001244097	63.41	76.83	82	29	1	5	85	5	86	7e-28	106	IPR011991; IPR000418	Y	ELK1	9606 [Organism: human] [Scientific Name: Homo sapiens]	Y	17	1DUX-C00	3	65.99	72.78	0.7719	0.8512	0.8946	1.16	81	80
1DUX	C	P19419	gi|7767065|pdb|1DUX|C	63.41	76.83	82	29	1	5	85	5	86	1e-30	107	15.4	1.2	81	86	63	'MOLECULE: DNA (5''- '	NP_001244097.1	NP_001244097	63.41	76.83	82	29	1	5	85	5	86	7e-28	106	IPR011991; IPR000418	Y	ELK1	9606 [Organism: human] [Scientific Name: Homo sapiens]	Y	17	1DUX-C00	3	65.99	72.78	0.7719	0.8512	0.8946	1.16	81	80
1DUX	C	P19419	gi|7767065|pdb|1DUX|C	63.41	76.83	82	29	1	5	85	5	86	1e-30	107	15.4	1.2	81	86	63	'MOLECULE: DNA (5''- '	NP_001244097.1	NP_001244097	63.41	76.83	82	29	1	5	85	5	86	7e-28	106	IPR011991; IPR000418	Y	ELK1	9606 [Organism: human] [Scientific Name: Homo sapiens]	Y	17	1DUX-C00	3	65.99	72.78	0.7719	0.8512	0.8946	1.16	81	80
1DUX	C	P19419	gi|7767065|pdb|1DUX|C	63.41	76.83	82	29	1	5	85	5	86	1e-30	107	15.4	1.2	81	86	63	'MOLECULE: DNA (5''- '	NP_001244097.1	NP_001244097	63.41	76.83	82	29	1	5	85	5	86	7e-28	106	IPR011991; IPR000418	Y	ELK1	9606 [Organism: human] [Scientific Name: Homo sapiens]	Y	17	1DUX-C00	3	65.99	72.78	0.7719	0.8512	0.8946	1.16	81	80
1DUX	C	P19419	gi|7767065|pdb|1DUX|C	63.41	76.83	82	29	1	5	85	5	86	1e-30	107	15.4	1.2	81	86	63	'MOLECULE: DNA (5''- '	NP_001244097.1	NP_001244097	63.41	76.83	82	29	1	5	85	5	86	7e-28	106	IPR011991; IPR000418	Y	ELK1	9606 [Organism: human] [Scientific Name: Homo sapiens]	Y	17	1DUX-C00	3	65.99	72.78	0.7719	0.8512	0.8946	1.16	81	80
1DUX	C	P19419	gi|7767065|pdb|1DUX|C	63.41	76.83	82	29	1	5	85	5	86	1e-30	107	15.4	1.2	81	86	63	'MOLECULE: DNA (5''- '	NP_001244097.1	NP_001244097	63.41	76.83	82	29	1	5	85	5	86	7e-28	106	IPR011991; IPR000418	Y	ELK1	9606 [Organism: human] [Scientific Name: Homo sapiens]	Y	17	1DUX-C00	3	65.99	72.78	0.7719	0.8512	0.8946	1.16	81	80
1DUX	C	P19419	gi|7767065|pdb|1DUX|C	63.41	76.83	82	29	1	5	85	5	86	1e-30	107	15.4	1.2	81	86	63	'MOLECULE: DNA (5''- '	NP_001244097.1	NP_001244097	63.41	76.83	82	29	1	5	85	5	86	7e-28	106	IPR011991; IPR000418	Y	ELK1	9606 [Organism: human] [Scientific Name: Homo sapiens]	Y	17	1DUX-C00	3	65.99	72.78	0.7719	0.8512	0.8946	1.16	81	80
1DUX	C	P19419	gi|7767065|pdb|1DUX|C	63.41	76.83	82	29	1	5	85	5	86	1e-30	107	15.4	1.2	81	86	63	'MOLECULE: DNA (5''- '	NP_001244097.1	NP_001244097	63.41	76.83	82	29	1	5	85	5	86	7e-28	106	IPR011991; IPR000418	Y	ELK1	9606 [Organism: human] [Scientific Name: Homo sapiens]	Y	17	1DUX-C00	3	65.99	72.78	0.7719	0.8512	0.8946	1.16	81	80
1DUX	C	P19419	gi|7767065|pdb|1DUX|C	63.41	76.83	82	29	1	5	85	5	86	1e-30	107	15.4	1.2	81	86	63	'MOLECULE: DNA (5''- '	NP_001244097.1	NP_001244097	63.41	76.83	82	29	1	5	85	5	86	7e-28	106	IPR011991; IPR000418	Y	ELK1	9606 [Organism: human] [Scientific Name: Homo sapiens]	Y	17	1DUX-C00	3	65.99	72.78	0.7719	0.8512	0.8946	1.16	81	80
1DUX	C	P19419	gi|7767065|pdb|1DUX|C	63.41	76.83	82	29	1	5	85	5	86	1e-30	107	15.4	1.2	81	86	63	'MOLECULE: DNA (5''- '	NP_001244097.1	NP_001244097	63.41	76.83	82	29	1	5	85	5	86	7e-28	106	IPR011991; IPR000418	Y	ELK1	9606 [Organism: human] [Scientific Name: Homo sapiens]	Y	17	1DUX-C00	3	65.99	72.78	0.7719	0.8512	0.8946	1.16	81	80
1DUX	C	P19419	gi|7767065|pdb|1DUX|C	63.41	76.83	82	29	1	5	85	5	86	1e-30	107	15.4	1.2	81	86	63	'MOLECULE: DNA (5''- '	NP_001244097.1	NP_001244097	63.41	76.83	82	29	1	5	85	5	86	7e-28	106	IPR011991; IPR000418	Y	ELK1	9606 [Organism: human] [Scientific Name: Homo sapiens]	Y	17	1DUX-C00	3	65.99	72.78	0.7719	0.8512	0.8946	1.16	81	80
1DUX	C	P19419	gi|7767065|pdb|1DUX|C	63.41	76.83	82	29	1	5	85	5	86	1e-30	107	15.4	1.2	81	86	63	'MOLECULE: DNA (5''- '	NP_001244097.1	NP_001244097	63.41	76.83	82	29	1	5	85	5	86	7e-28	106	IPR011991; IPR000418	Y	ELK1	9606 [Organism: human] [Scientific Name: Homo sapiens]	Y	17	1DUX-C00	3	65.99	72.78	0.7719	0.8512	0.8946	1.16	81	80
1DUX	C	P19419	gi|7767065|pdb|1DUX|C	63.41	76.83	82	29	1	5	85	5	86	1e-30	107	15.4	1.2	81	86	63	'MOLECULE: DNA (5''- '	NP_001244097.1	NP_001244097	63.41	76.83	82	29	1	5	85	5	86	7e-28	106	IPR011991; IPR000418	Y	ELK1	9606 [Organism: human] [Scientific Name: Homo sapiens]	Y	17	1DUX-C00	3	65.99	72.78	0.7719	0.8512	0.8946	1.16	81	80
1DUX	C	P19419	gi|7767065|pdb|1DUX|C	63.41	76.83	82	29	1	5	85	5	86	1e-30	107	15.4	1.2	81	86	63	'MOLECULE: DNA (5''- '	NP_001244097.1	NP_001244097	63.41	76.83	82	29	1	5	85	5	86	7e-28	106	IPR011991; IPR000418	Y	ELK1	9606 [Organism: human] [Scientific Name: Homo sapiens]	Y	17	1DUX-C00	3	65.99	72.78	0.7719	0.8512	0.8946	1.16	81	80
1DUX	C	P19419	gi|7767065|pdb|1DUX|C	63.41	76.83	82	29	1	5	85	5	86	1e-30	107	15.4	1.2	81	86	63	'MOLECULE: DNA (5''- '	NP_001244097.1	NP_001244097	63.41	76.83	82	29	1	5	85	5	86	7e-28	106	IPR011991; IPR000418	Y	ELK1	9606 [Organism: human] [Scientific Name: Homo sapiens]	Y	17	1DUX-C00	3	65.99	72.78	0.7719	0.8512	0.8946	1.16	81	80
1DUX	C	P19419	gi|7767065|pdb|1DUX|C	63.41	76.83	82	29	1	5	85	5	86	1e-30	107	15.4	1.2	81	86	63	'MOLECULE: DNA (5''- '	NP_001244097.1	NP_001244097	63.41	76.83	82	29	1	5	85	5	86	7e-28	106	IPR011991; IPR000418	Y	ELK1	9606 [Organism: human] [Scientific Name: Homo sapiens]	Y	17	1DUX-C00	3	65.99	72.78	0.7719	0.8512	0.8946	1.16	81	80
1DUX	C	P19419	gi|7767065|pdb|1DUX|C	63.41	76.83	82	29	1	5	85	5	86	1e-30	107	15.4	1.2	81	86	63	'MOLECULE: DNA (5''- '	NP_001244097.1	NP_001244097	63.41	76.83	82	29	1	5	85	5	86	7e-28	106	IPR011991; IPR000418	Y	ELK1	9606 [Organism: human] [Scientific Name: Homo sapiens]	Y	17	1DUX-C00	3	65.99	72.78	0.7719	0.8512	0.8946	1.16	81	80
1DUX	C	P19419	gi|7767065|pdb|1DUX|C	63.41	76.83	82	29	1	5	85	5	86	1e-30	107	15.4	1.2	81	86	63	'MOLECULE: DNA (5''- '	NP_001244097.1	NP_001244097	63.41	76.83	82	29	1	5	85	5	86	7e-28	106	IPR011991; IPR000418	Y	ELK1	9606 [Organism: human] [Scientific Name: Homo sapiens]	Y	17	1DUX-C00	3	65.99	72.78	0.7719	0.8512	0.8946	1.16	81	80
1DUX	C	P19419	gi|7767065|pdb|1DUX|C	63.41	76.83	82	29	1	5	85	5	86	1e-30	107	15.4	1.2	81	86	63	'MOLECULE: DNA (5''- '	NP_001244097.1	NP_001244097	63.41	76.83	82	29	1	5	85	5	86	7e-28	106	IPR011991; IPR000418	Y	ELK1	9606 [Organism: human] [Scientific Name: Homo sapiens]	Y	17	1DUX-C00	3	65.99	72.78	0.7719	0.8512	0.8946	1.16	81	80
1DUX	C	P19419	gi|7767065|pdb|1DUX|C	63.41	76.83	82	29	1	5	85	5	86	1e-30	107	15.4	1.2	81	86	63	'MOLECULE: DNA (5''- '	NP_001244097.1	NP_001244097	63.41	76.83	82	29	1	5	85	5	86	7e-28	106	IPR011991; IPR000418	Y	ELK1	9606 [Organism: human] [Scientific Name: Homo sapiens]	Y	17	1DUX-C00	3	65.99	72.78	0.7719	0.8512	0.8946	1.16	81	80
1DUX	C	P19419	gi|7767065|pdb|1DUX|C	63.41	76.83	82	29	1	5	85	5	86	1e-30	107	15.4	1.2	81	86	63	'MOLECULE: DNA (5''- '	NP_001244097.1	NP_001244097	63.41	76.83	82	29	1	5	85	5	86	7e-28	106	IPR011991; IPR000418	Y	ELK1	9606 [Organism: human] [Scientific Name: Homo sapiens]	Y	17	1DUX-C00	3	65.99	72.78	0.7719	0.8512	0.8946	1.16	81	80
1DUX	C	P19419	gi|7767065|pdb|1DUX|C	63.41	76.83	82	29	1	5	85	5	86	1e-30	107	15.4	1.2	81	86	63	'MOLECULE: DNA (5''- '	NP_001244097.1	NP_001244097	63.41	76.83	82	29	1	5	85	5	86	7e-28	106	IPR011991; IPR000418	Y	ELK1	9606 [Organism: human] [Scientific Name: Homo sapiens]	Y	17	1DUX-C00	3	65.99	72.78	0.7719	0.8512	0.8946	1.16	81	80
1DUX	C	P19419	gi|7767065|pdb|1DUX|C	63.41	76.83	82	29	1	5	85	5	86	1e-30	107	15.4	1.2	81	86	63	'MOLECULE: DNA (5''- '	NP_001244097.1	NP_001244097	63.41	76.83	82	29	1	5	85	5	86	7e-28	106	IPR011991; IPR000418	Y	ELK1	9606 [Organism: human] [Scientific Name: Homo sapiens]	Y	17	1DUX-C00	3	65.99	72.78	0.7719	0.8512	0.8946	1.16	81	80
1DUX	C	P19419	gi|7767065|pdb|1DUX|C	63.41	76.83	82	29	1	5	85	5	86	1e-30	107	15.4	1.2	81	86	63	'MOLECULE: DNA (5''- '	NP_001244097.1	NP_001244097	63.41	76.83	82	29	1	5	85	5	86	7e-28	106	IPR011991; IPR000418	Y	ELK1	9606 [Organism: human] [Scientific Name: Homo sapiens]	Y	17	1DUX-C00	3	65.99	72.78	0.7719	0.8512	0.8946	1.16	81	80
1DUX	C	P19419	gi|7767065|pdb|1DUX|C	63.41	76.83	82	29	1	5	85	5	86	1e-30	107	15.4	1.2	81	86	63	'MOLECULE: DNA (5''- '	NP_001244097.1	NP_001244097	63.41	76.83	82	29	1	5	85	5	86	7e-28	106	IPR011991; IPR000418	Y	ELK1	9606 [Organism: human] [Scientific Name: Homo sapiens]	Y	17	1DUX-C00	3	65.99	72.78	0.7719	0.8512	0.8946	1.16	81	80
1DUX	C	P19419	gi|7767065|pdb|1DUX|C	63.41	76.83	82	29	1	5	85	5	86	1e-30	107	15.4	1.2	81	86	63	'MOLECULE: DNA (5''- '	NP_001244097.1	NP_001244097	63.41	76.83	82	29	1	5	85	5	86	7e-28	106	IPR011991; IPR000418	Y	ELK1	9606 [Organism: human] [Scientific Name: Homo sapiens]	Y	17	1DUX-C00	3	65.99	72.78	0.7719	0.8512	0.8946	1.16	81	80
1DUX	C	P19419	gi|7767065|pdb|1DUX|C	63.41	76.83	82	29	1	5	85	5	86	1e-30	107	15.4	1.2	81	86	63	'MOLECULE: DNA (5''- '	NP_001244097.1	NP_001244097	63.41	76.83	82	29	1	5	85	5	86	7e-28	106	IPR011991; IPR000418	Y	ELK1	9606 [Organism: human] [Scientific Name: Homo sapiens]	Y	17	1DUX-C00	3	65.99	72.78	0.7719	0.8512	0.8946	1.16	81	80
1DUX	C	P19419	gi|7767065|pdb|1DUX|C	63.41	76.83	82	29	1	5	85	5	86	1e-30	107	15.4	1.2	81	86	63	'MOLECULE: DNA (5''- '	NP_001244097.1	NP_001244097	63.41	76.83	82	29	1	5	85	5	86	7e-28	106	IPR011991; IPR000418	Y	ELK1	9606 [Organism: human] [Scientific Name: Homo sapiens]	Y	17	1DUX-C00	3	65.99	72.78	0.7719	0.8512	0.8946	1.16	81	80
1DUX	C	P19419	gi|7767065|pdb|1DUX|C	63.41	76.83	82	29	1	5	85	5	86	1e-30	107	15.4	1.2	81	86	63	'MOLECULE: DNA (5''- '	NP_001244097.1	NP_001244097	63.41	76.83	82	29	1	5	85	5	86	7e-28	106	IPR011991; IPR000418	Y	ELK1	9606 [Organism: human] [Scientific Name: Homo sapiens]	Y	17	1DUX-C00	3	65.99	72.78	0.7719	0.8512	0.8946	1.16	81	80
1DUX	C	P19419	gi|7767065|pdb|1DUX|C	63.41	76.83	82	29	1	5	85	5	86	1e-30	107	15.4	1.2	81	86	63	'MOLECULE: DNA (5''- '	NP_001244097.1	NP_001244097	63.41	76.83	82	29	1	5	85	5	86	7e-28	106	IPR011991; IPR000418	Y	ELK1	9606 [Organism: human] [Scientific Name: Homo sapiens]	Y	17	1DUX-C00	3	65.99	72.78	0.7719	0.8512	0.8946	1.16	81	80
1DUX	C	P19419	gi|7767065|pdb|1DUX|C	63.41	76.83	82	29	1	5	85	5	86	1e-30	107	15.4	1.2	81	86	63	'MOLECULE: DNA (5''- '	NP_001244097.1	NP_001244097	63.41	76.83	82	29	1	5	85	5	86	7e-28	106	IPR011991; IPR000418	Y	ELK1	9606 [Organism: human] [Scientific Name: Homo sapiens]	Y	17	1DUX-C00	3	65.99	72.78	0.7719	0.8512	0.8946	1.16	81	80
1DUX	C	P19419	gi|7767065|pdb|1DUX|C	63.41	76.83	82	29	1	5	85	5	86	1e-30	107	15.4	1.2	81	86	63	'MOLECULE: DNA (5''- '	NP_005220.2	NP_005220	63.41	76.83	82	29	1	5	85	5	86	1e-28	115	IPR011991; IPR000418	Y	ELK1	9606 [Organism: human] [Scientific Name: Homo sapiens]	Y	17	1DUX-C00	3	65.99	72.78	0.7719	0.8512	0.8946	1.16	81	80
1DUX	C	P19419	gi|7767065|pdb|1DUX|C	63.41	76.83	82	29	1	5	85	5	86	1e-30	107	15.4	1.2	81	86	63	'MOLECULE: DNA (5''- '	NP_005220.2	NP_005220	63.41	76.83	82	29	1	5	85	5	86	1e-28	115	IPR011991; IPR000418	Y	ELK1	9606 [Organism: human] [Scientific Name: Homo sapiens]	Y	17	1DUX-C00	3	65.99	72.78	0.7719	0.8512	0.8946	1.16	81	80
1DUX	C	P19419	gi|7767065|pdb|1DUX|C	63.41	76.83	82	29	1	5	85	5	86	1e-30	107	15.4	1.2	81	86	63	'MOLECULE: DNA (5''- '	NP_005220.2	NP_005220	63.41	76.83	82	29	1	5	85	5	86	1e-28	115	IPR011991; IPR000418	Y	ELK1	9606 [Organism: human] [Scientific Name: Homo sapiens]	Y	17	1DUX-C00	3	65.99	72.78	0.7719	0.8512	0.8946	1.16	81	80
1DUX	C	P19419	gi|7767065|pdb|1DUX|C	63.41	76.83	82	29	1	5	85	5	86	1e-30	107	15.4	1.2	81	86	63	'MOLECULE: DNA (5''- '	NP_005220.2	NP_005220	63.41	76.83	82	29	1	5	85	5	86	1e-28	115	IPR011991; IPR000418	Y	ELK1	9606 [Organism: human] [Scientific Name: Homo sapiens]	Y	17	1DUX-C00	3	65.99	72.78	0.7719	0.8512	0.8946	1.16	81	80
1DUX	C	P19419	gi|7767065|pdb|1DUX|C	63.41	76.83	82	29	1	5	85	5	86	1e-30	107	15.4	1.2	81	86	63	'MOLECULE: DNA (5''- '	NP_005220.2	NP_005220	63.41	76.83	82	29	1	5	85	5	86	1e-28	115	IPR011991; IPR000418	Y	ELK1	9606 [Organism: human] [Scientific Name: Homo sapiens]	Y	17	1DUX-C00	3	65.99	72.78	0.7719	0.8512	0.8946	1.16	81	80
1DUX	C	P19419	gi|7767065|pdb|1DUX|C	63.41	76.83	82	29	1	5	85	5	86	1e-30	107	15.4	1.2	81	86	63	'MOLECULE: DNA (5''- '	NP_005220.2	NP_005220	63.41	76.83	82	29	1	5	85	5	86	1e-28	115	IPR011991; IPR000418	Y	ELK1	9606 [Organism: human] [Scientific Name: Homo sapiens]	Y	17	1DUX-C00	3	65.99	72.78	0.7719	0.8512	0.8946	1.16	81	80
1DUX	C	P19419	gi|7767065|pdb|1DUX|C	63.41	76.83	82	29	1	5	85	5	86	1e-30	107	15.4	1.2	81	86	63	'MOLECULE: DNA (5''- '	NP_005220.2	NP_005220	63.41	76.83	82	29	1	5	85	5	86	1e-28	115	IPR011991; IPR000418	Y	ELK1	9606 [Organism: human] [Scientific Name: Homo sapiens]	Y	17	1DUX-C00	3	65.99	72.78	0.7719	0.8512	0.8946	1.16	81	80
1DUX	C	P19419	gi|7767065|pdb|1DUX|C	63.41	76.83	82	29	1	5	85	5	86	1e-30	107	15.4	1.2	81	86	63	'MOLECULE: DNA (5''- '	NP_005220.2	NP_005220	63.41	76.83	82	29	1	5	85	5	86	1e-28	115	IPR011991; IPR000418	Y	ELK1	9606 [Organism: human] [Scientific Name: Homo sapiens]	Y	17	1DUX-C00	3	65.99	72.78	0.7719	0.8512	0.8946	1.16	81	80
1DUX	C	P19419	gi|7767065|pdb|1DUX|C	63.41	76.83	82	29	1	5	85	5	86	1e-30	107	15.4	1.2	81	86	63	'MOLECULE: DNA (5''- '	NP_005220.2	NP_005220	63.41	76.83	82	29	1	5	85	5	86	1e-28	115	IPR011991; IPR000418	Y	ELK1	9606 [Organism: human] [Scientific Name: Homo sapiens]	Y	17	1DUX-C00	3	65.99	72.78	0.7719	0.8512	0.8946	1.16	81	80
1DUX	C	P19419	gi|7767065|pdb|1DUX|C	63.41	76.83	82	29	1	5	85	5	86	1e-30	107	15.4	1.2	81	86	63	'MOLECULE: DNA (5''- '	NP_005220.2	NP_005220	63.41	76.83	82	29	1	5	85	5	86	1e-28	115	IPR011991; IPR000418	Y	ELK1	9606 [Organism: human] [Scientific Name: Homo sapiens]	Y	17	1DUX-C00	3	65.99	72.78	0.7719	0.8512	0.8946	1.16	81	80
1DUX	C	P19419	gi|7767065|pdb|1DUX|C	63.41	76.83	82	29	1	5	85	5	86	1e-30	107	15.4	1.2	81	86	63	'MOLECULE: DNA (5''- '	NP_005220.2	NP_005220	63.41	76.83	82	29	1	5	85	5	86	1e-28	115	IPR011991; IPR000418	Y	ELK1	9606 [Organism: human] [Scientific Name: Homo sapiens]	Y	17	1DUX-C00	3	65.99	72.78	0.7719	0.8512	0.8946	1.16	81	80
1DUX	C	P19419	gi|7767065|pdb|1DUX|C	63.41	76.83	82	29	1	5	85	5	86	1e-30	107	15.4	1.2	81	86	63	'MOLECULE: DNA (5''- '	NP_005220.2	NP_005220	63.41	76.83	82	29	1	5	85	5	86	1e-28	115	IPR011991; IPR000418	Y	ELK1	9606 [Organism: human] [Scientific Name: Homo sapiens]	Y	17	1DUX-C00	3	65.99	72.78	0.7719	0.8512	0.8946	1.16	81	80
1DUX	C	P19419	gi|7767065|pdb|1DUX|C	63.41	76.83	82	29	1	5	85	5	86	1e-30	107	15.4	1.2	81	86	63	'MOLECULE: DNA (5''- '	NP_005220.2	NP_005220	63.41	76.83	82	29	1	5	85	5	86	1e-28	115	IPR011991; IPR000418	Y	ELK1	9606 [Organism: human] [Scientific Name: Homo sapiens]	Y	17	1DUX-C00	3	65.99	72.78	0.7719	0.8512	0.8946	1.16	81	80
1DUX	C	P19419	gi|7767065|pdb|1DUX|C	63.41	76.83	82	29	1	5	85	5	86	1e-30	107	15.4	1.2	81	86	63	'MOLECULE: DNA (5''- '	NP_005220.2	NP_005220	63.41	76.83	82	29	1	5	85	5	86	1e-28	115	IPR011991; IPR000418	Y	ELK1	9606 [Organism: human] [Scientific Name: Homo sapiens]	Y	17	1DUX-C00	3	65.99	72.78	0.7719	0.8512	0.8946	1.16	81	80
1DUX	C	P19419	gi|7767065|pdb|1DUX|C	63.41	76.83	82	29	1	5	85	5	86	1e-30	107	15.4	1.2	81	86	63	'MOLECULE: DNA (5''- '	NP_005220.2	NP_005220	63.41	76.83	82	29	1	5	85	5	86	1e-28	115	IPR011991; IPR000418	Y	ELK1	9606 [Organism: human] [Scientific Name: Homo sapiens]	Y	17	1DUX-C00	3	65.99	72.78	0.7719	0.8512	0.8946	1.16	81	80
1DUX	C	P19419	gi|7767065|pdb|1DUX|C	63.41	76.83	82	29	1	5	85	5	86	1e-30	107	15.4	1.2	81	86	63	'MOLECULE: DNA (5''- '	NP_005220.2	NP_005220	63.41	76.83	82	29	1	5	85	5	86	1e-28	115	IPR011991; IPR000418	Y	ELK1	9606 [Organism: human] [Scientific Name: Homo sapiens]	Y	17	1DUX-C00	3	65.99	72.78	0.7719	0.8512	0.8946	1.16	81	80
1DUX	C	P19419	gi|7767065|pdb|1DUX|C	63.41	76.83	82	29	1	5	85	5	86	1e-30	107	15.4	1.2	81	86	63	'MOLECULE: DNA (5''- '	NP_005220.2	NP_005220	63.41	76.83	82	29	1	5	85	5	86	1e-28	115	IPR011991; IPR000418	Y	ELK1	9606 [Organism: human] [Scientific Name: Homo sapiens]	Y	17	1DUX-C00	3	65.99	72.78	0.7719	0.8512	0.8946	1.16	81	80
1DUX	C	P19419	gi|7767065|pdb|1DUX|C	63.41	76.83	82	29	1	5	85	5	86	1e-30	107	15.4	1.2	81	86	63	'MOLECULE: DNA (5''- '	NP_005220.2	NP_005220	63.41	76.83	82	29	1	5	85	5	86	1e-28	115	IPR011991; IPR000418	Y	ELK1	9606 [Organism: human] [Scientific Name: Homo sapiens]	Y	17	1DUX-C00	3	65.99	72.78	0.7719	0.8512	0.8946	1.16	81	80
1DUX	C	P19419	gi|7767065|pdb|1DUX|C	63.41	76.83	82	29	1	5	85	5	86	1e-30	107	15.4	1.2	81	86	63	'MOLECULE: DNA (5''- '	NP_005220.2	NP_005220	63.41	76.83	82	29	1	5	85	5	86	1e-28	115	IPR011991; IPR000418	Y	ELK1	9606 [Organism: human] [Scientific Name: Homo sapiens]	Y	17	1DUX-C00	3	65.99	72.78	0.7719	0.8512	0.8946	1.16	81	80
1DUX	C	P19419	gi|7767065|pdb|1DUX|C	63.41	76.83	82	29	1	5	85	5	86	1e-30	107	15.4	1.2	81	86	63	'MOLECULE: DNA (5''- '	NP_005220.2	NP_005220	63.41	76.83	82	29	1	5	85	5	86	1e-28	115	IPR011991; IPR000418	Y	ELK1	9606 [Organism: human] [Scientific Name: Homo sapiens]	Y	17	1DUX-C00	3	65.99	72.78	0.7719	0.8512	0.8946	1.16	81	80
1DUX	C	P19419	gi|7767065|pdb|1DUX|C	63.41	76.83	82	29	1	5	85	5	86	1e-30	107	15.4	1.2	81	86	63	'MOLECULE: DNA (5''- '	NP_005220.2	NP_005220	63.41	76.83	82	29	1	5	85	5	86	1e-28	115	IPR011991; IPR000418	Y	ELK1	9606 [Organism: human] [Scientific Name: Homo sapiens]	Y	17	1DUX-C00	3	65.99	72.78	0.7719	0.8512	0.8946	1.16	81	80
1DUX	C	P19419	gi|7767065|pdb|1DUX|C	63.41	76.83	82	29	1	5	85	5	86	1e-30	107	15.4	1.2	81	86	63	'MOLECULE: DNA (5''- '	NP_005220.2	NP_005220	63.41	76.83	82	29	1	5	85	5	86	1e-28	115	IPR011991; IPR000418	Y	ELK1	9606 [Organism: human] [Scientific Name: Homo sapiens]	Y	17	1DUX-C00	3	65.99	72.78	0.7719	0.8512	0.8946	1.16	81	80
1DUX	C	P19419	gi|7767065|pdb|1DUX|C	63.41	76.83	82	29	1	5	85	5	86	1e-30	107	15.4	1.2	81	86	63	'MOLECULE: DNA (5''- '	NP_005220.2	NP_005220	63.41	76.83	82	29	1	5	85	5	86	1e-28	115	IPR011991; IPR000418	Y	ELK1	9606 [Organism: human] [Scientific Name: Homo sapiens]	Y	17	1DUX-C00	3	65.99	72.78	0.7719	0.8512	0.8946	1.16	81	80
1DUX	C	P19419	gi|7767065|pdb|1DUX|C	63.41	76.83	82	29	1	5	85	5	86	1e-30	107	15.4	1.2	81	86	63	'MOLECULE: DNA (5''- '	NP_005220.2	NP_005220	63.41	76.83	82	29	1	5	85	5	86	1e-28	115	IPR011991; IPR000418	Y	ELK1	9606 [Organism: human] [Scientific Name: Homo sapiens]	Y	17	1DUX-C00	3	65.99	72.78	0.7719	0.8512	0.8946	1.16	81	80
1DUX	C	P19419	gi|7767065|pdb|1DUX|C	63.41	76.83	82	29	1	5	85	5	86	1e-30	107	15.4	1.2	81	86	63	'MOLECULE: DNA (5''- '	NP_005220.2	NP_005220	63.41	76.83	82	29	1	5	85	5	86	1e-28	115	IPR011991; IPR000418	Y	ELK1	9606 [Organism: human] [Scientific Name: Homo sapiens]	Y	17	1DUX-C00	3	65.99	72.78	0.7719	0.8512	0.8946	1.16	81	80
1DUX	C	P19419	gi|7767065|pdb|1DUX|C	63.41	76.83	82	29	1	5	85	5	86	1e-30	107	15.4	1.2	81	86	63	'MOLECULE: DNA (5''- '	NP_005220.2	NP_005220	63.41	76.83	82	29	1	5	85	5	86	1e-28	115	IPR011991; IPR000418	Y	ELK1	9606 [Organism: human] [Scientific Name: Homo sapiens]	Y	17	1DUX-C00	3	65.99	72.78	0.7719	0.8512	0.8946	1.16	81	80
1DUX	C	P19419	gi|7767065|pdb|1DUX|C	63.41	76.83	82	29	1	5	85	5	86	1e-30	107	15.4	1.2	81	86	63	'MOLECULE: DNA (5''- '	NP_005220.2	NP_005220	63.41	76.83	82	29	1	5	85	5	86	1e-28	115	IPR011991; IPR000418	Y	ELK1	9606 [Organism: human] [Scientific Name: Homo sapiens]	Y	17	1DUX-C00	3	65.99	72.78	0.7719	0.8512	0.8946	1.16	81	80
1DUX	C	P19419	gi|7767065|pdb|1DUX|C	63.41	76.83	82	29	1	5	85	5	86	1e-30	107	15.4	1.2	81	86	63	'MOLECULE: DNA (5''- '	NP_005220.2	NP_005220	63.41	76.83	82	29	1	5	85	5	86	1e-28	115	IPR011991; IPR000418	Y	ELK1	9606 [Organism: human] [Scientific Name: Homo sapiens]	Y	17	1DUX-C00	3	65.99	72.78	0.7719	0.8512	0.8946	1.16	81	80
1DUX	C	P19419	gi|7767065|pdb|1DUX|C	63.41	76.83	82	29	1	5	85	5	86	1e-30	107	15.4	1.2	81	86	63	'MOLECULE: DNA (5''- '	NP_005220.2	NP_005220	63.41	76.83	82	29	1	5	85	5	86	1e-28	115	IPR011991; IPR000418	Y	ELK1	9606 [Organism: human] [Scientific Name: Homo sapiens]	Y	17	1DUX-C00	3	65.99	72.78	0.7719	0.8512	0.8946	1.16	81	80
1DUX	C	P19419	gi|7767065|pdb|1DUX|C	63.41	76.83	82	29	1	5	85	5	86	1e-30	107	15.4	1.2	81	86	63	'MOLECULE: DNA (5''- '	NP_005220.2	NP_005220	63.41	76.83	82	29	1	5	85	5	86	1e-28	115	IPR011991; IPR000418	Y	ELK1	9606 [Organism: human] [Scientific Name: Homo sapiens]	Y	17	1DUX-C00	3	65.99	72.78	0.7719	0.8512	0.8946	1.16	81	80
1DUX	C	P19419	gi|7767065|pdb|1DUX|C	63.41	76.83	82	29	1	5	85	5	86	1e-30	107	15.4	1.2	81	86	63	'MOLECULE: DNA (5''- '	NP_005220.2	NP_005220	63.41	76.83	82	29	1	5	85	5	86	1e-28	115	IPR011991; IPR000418	Y	ELK1	9606 [Organism: human] [Scientific Name: Homo sapiens]	Y	17	1DUX-C00	3	65.99	72.78	0.7719	0.8512	0.8946	1.16	81	80
1DUX	C	P19419	gi|7767065|pdb|1DUX|C	63.41	76.83	82	29	1	5	85	5	86	1e-30	107	15.4	1.2	81	86	63	'MOLECULE: DNA (5''- '	NP_005220.2	NP_005220	63.41	76.83	82	29	1	5	85	5	86	1e-28	115	IPR011991; IPR000418	Y	ELK1	9606 [Organism: human] [Scientific Name: Homo sapiens]	Y	17	1DUX-C00	3	65.99	72.78	0.7719	0.8512	0.8946	1.16	81	80
1DUX	C	P19419	gi|7767065|pdb|1DUX|C	63.41	76.83	82	29	1	5	85	5	86	1e-30	107	15.4	1.2	81	86	63	'MOLECULE: DNA (5''- '	NP_005220.2	NP_005220	63.41	76.83	82	29	1	5	85	5	86	1e-28	115	IPR011991; IPR000418	Y	ELK1	9606 [Organism: human] [Scientific Name: Homo sapiens]	Y	17	1DUX-C00	3	65.99	72.78	0.7719	0.8512	0.8946	1.16	81	80
1DUX	C	P19419	gi|7767065|pdb|1DUX|C	63.41	76.83	82	29	1	5	85	5	86	1e-30	107	15.4	1.2	81	86	63	'MOLECULE: DNA (5''- '	NP_005220.2	NP_005220	63.41	76.83	82	29	1	5	85	5	86	1e-28	115	IPR011991; IPR000418	Y	ELK1	9606 [Organism: human] [Scientific Name: Homo sapiens]	Y	17	1DUX-C00	3	65.99	72.78	0.7719	0.8512	0.8946	1.16	81	80
1DUX	C	P19419	gi|7767065|pdb|1DUX|C	63.41	76.83	82	29	1	5	85	5	86	1e-30	107	15.4	1.2	81	86	63	'MOLECULE: DNA (5''- '	NP_005220.2	NP_005220	63.41	76.83	82	29	1	5	85	5	86	1e-28	115	IPR011991; IPR000418	Y	ELK1	9606 [Organism: human] [Scientific Name: Homo sapiens]	Y	17	1DUX-C00	3	65.99	72.78	0.7719	0.8512	0.8946	1.16	81	80
1DUX	C	P19419	gi|7767065|pdb|1DUX|C	63.41	76.83	82	29	1	5	85	5	86	1e-30	107	15.4	1.2	81	86	63	'MOLECULE: DNA (5''- '	NP_005220.2	NP_005220	63.41	76.83	82	29	1	5	85	5	86	1e-28	115	IPR011991; IPR000418	Y	ELK1	9606 [Organism: human] [Scientific Name: Homo sapiens]	Y	17	1DUX-C00	3	65.99	72.78	0.7719	0.8512	0.8946	1.16	81	80
1DUX	C	P19419	gi|7767065|pdb|1DUX|C	63.41	76.83	82	29	1	5	85	5	86	1e-30	107	15.4	1.2	81	86	63	'MOLECULE: DNA (5''- '	NP_005220.2	NP_005220	63.41	76.83	82	29	1	5	85	5	86	1e-28	115	IPR011991; IPR000418	Y	ELK1	9606 [Organism: human] [Scientific Name: Homo sapiens]	Y	17	1DUX-C00	3	65.99	72.78	0.7719	0.8512	0.8946	1.16	81	80
1DUX	C	P19419	gi|7767065|pdb|1DUX|C	63.41	76.83	82	29	1	5	85	5	86	1e-30	107	15.4	1.2	81	86	63	'MOLECULE: DNA (5''- '	NP_005220.2	NP_005220	63.41	76.83	82	29	1	5	85	5	86	1e-28	115	IPR011991; IPR000418	Y	ELK1	9606 [Organism: human] [Scientific Name: Homo sapiens]	Y	17	1DUX-C00	3	65.99	72.78	0.7719	0.8512	0.8946	1.16	81	80
1DUX	C	P19419	gi|7767065|pdb|1DUX|C	63.41	76.83	82	29	1	5	85	5	86	1e-30	107	15.4	1.2	81	86	63	'MOLECULE: DNA (5''- '	NP_005220.2	NP_005220	63.41	76.83	82	29	1	5	85	5	86	1e-28	115	IPR011991; IPR000418	Y	ELK1	9606 [Organism: human] [Scientific Name: Homo sapiens]	Y	17	1DUX-C00	3	65.99	72.78	0.7719	0.8512	0.8946	1.16	81	80
1DUX	C	P19419	gi|7767065|pdb|1DUX|C	63.41	76.83	82	29	1	5	85	5	86	1e-30	107	15.4	1.2	81	86	63	'MOLECULE: DNA (5''- '	NP_005220.2	NP_005220	63.41	76.83	82	29	1	5	85	5	86	1e-28	115	IPR011991; IPR000418	Y	ELK1	9606 [Organism: human] [Scientific Name: Homo sapiens]	Y	17	1DUX-C00	3	65.99	72.78	0.7719	0.8512	0.8946	1.16	81	80
1DUX	C	P19419	gi|7767065|pdb|1DUX|C	63.41	76.83	82	29	1	5	85	5	86	1e-30	107	15.4	1.2	81	86	63	'MOLECULE: DNA (5''- '	NP_005220.2	NP_005220	63.41	76.83	82	29	1	5	85	5	86	1e-28	115	IPR011991; IPR000418	Y	ELK1	9606 [Organism: human] [Scientific Name: Homo sapiens]	Y	17	1DUX-C00	3	65.99	72.78	0.7719	0.8512	0.8946	1.16	81	80
1DUX	C	P19419	gi|7767065|pdb|1DUX|C	63.41	76.83	82	29	1	5	85	5	86	1e-30	107	15.4	1.2	81	86	63	'MOLECULE: DNA (5''- '	NP_005220.2	NP_005220	63.41	76.83	82	29	1	5	85	5	86	1e-28	115	IPR011991; IPR000418	Y	ELK1	9606 [Organism: human] [Scientific Name: Homo sapiens]	Y	17	1DUX-C00	3	65.99	72.78	0.7719	0.8512	0.8946	1.16	81	80
1DUX	C	P19419	gi|7767065|pdb|1DUX|C	63.41	76.83	82	29	1	5	85	5	86	1e-30	107	15.4	1.2	81	86	63	'MOLECULE: DNA (5''- '	NP_005220.2	NP_005220	63.41	76.83	82	29	1	5	85	5	86	1e-28	115	IPR011991; IPR000418	Y	ELK1	9606 [Organism: human] [Scientific Name: Homo sapiens]	Y	17	1DUX-C00	3	65.99	72.78	0.7719	0.8512	0.8946	1.16	81	80
1DUX	C	P19419	gi|7767065|pdb|1DUX|C	63.41	76.83	82	29	1	5	85	5	86	1e-30	107	15.4	1.2	81	86	63	'MOLECULE: DNA (5''- '	NP_005220.2	NP_005220	63.41	76.83	82	29	1	5	85	5	86	1e-28	115	IPR011991; IPR000418	Y	ELK1	9606 [Organism: human] [Scientific Name: Homo sapiens]	Y	17	1DUX-C00	3	65.99	72.78	0.7719	0.8512	0.8946	1.16	81	80
1DUX	C	P19419	gi|7767065|pdb|1DUX|C	63.41	76.83	82	29	1	5	85	5	86	1e-30	107	15.4	1.2	81	86	63	'MOLECULE: DNA (5''- '	NP_005220.2	NP_005220	63.41	76.83	82	29	1	5	85	5	86	1e-28	115	IPR011991; IPR000418	Y	ELK1	9606 [Organism: human] [Scientific Name: Homo sapiens]	Y	17	1DUX-C00	3	65.99	72.78	0.7719	0.8512	0.8946	1.16	81	80
1DUX	C	P19419	gi|7767065|pdb|1DUX|C	63.41	76.83	82	29	1	5	85	5	86	1e-30	107	15.4	1.2	81	86	63	'MOLECULE: DNA (5''- '	NP_005220.2	NP_005220	63.41	76.83	82	29	1	5	85	5	86	1e-28	115	IPR011991; IPR000418	Y	ELK1	9606 [Organism: human] [Scientific Name: Homo sapiens]	Y	17	1DUX-C00	3	65.99	72.78	0.7719	0.8512	0.8946	1.16	81	80
1DUX	C	P19419	gi|7767065|pdb|1DUX|C	63.41	76.83	82	29	1	5	85	5	86	1e-30	107	15.4	1.2	81	86	63	'MOLECULE: DNA (5''- '	NP_005220.2	NP_005220	63.41	76.83	82	29	1	5	85	5	86	1e-28	115	IPR011991; IPR000418	Y	ELK1	9606 [Organism: human] [Scientific Name: Homo sapiens]	Y	17	1DUX-C00	3	65.99	72.78	0.7719	0.8512	0.8946	1.16	81	80
1DUX	C	P19419	gi|7767065|pdb|1DUX|C	63.41	76.83	82	29	1	5	85	5	86	1e-30	107	15.4	1.2	81	86	63	'MOLECULE: DNA (5''- '	NP_005220.2	NP_005220	63.41	76.83	82	29	1	5	85	5	86	1e-28	115	IPR011991; IPR000418	Y	ELK1	9606 [Organism: human] [Scientific Name: Homo sapiens]	Y	17	1DUX-C00	3	65.99	72.78	0.7719	0.8512	0.8946	1.16	81	80
1DUX	C	P19419	gi|7767065|pdb|1DUX|C	63.41	76.83	82	29	1	5	85	5	86	1e-30	107	15.4	1.2	81	86	63	'MOLECULE: DNA (5''- '	NP_005220.2	NP_005220	63.41	76.83	82	29	1	5	85	5	86	1e-28	115	IPR011991; IPR000418	Y	ELK1	9606 [Organism: human] [Scientific Name: Homo sapiens]	Y	17	1DUX-C00	3	65.99	72.78	0.7719	0.8512	0.8946	1.16	81	80
-	-	-	-	-	-	-	-	-	-	-	-	-	-	-	-	-	-	-	-	-	NP_005221.2	NP_005221	60	73.85	65	26	0	21	85	21	85	6e-20	90.9	IPR000418; IPR011991	Y	ELK3	9606 [Organism: human] [Scientific Name: Homo sapiens]	Y	27	-	-	-	-	-	-	-	-	-	-
-	-	-	-	-	-	-	-	-	-	-	-	-	-	-	-	-	-	-	-	-	NP_005221.2	NP_005221	60	73.85	65	26	0	21	85	21	85	6e-20	90.9	IPR000418; IPR011991	Y	ELK3	9606 [Organism: human] [Scientific Name: Homo sapiens]	Y	27	-	-	-	-	-	-	-	-	-	-
-	-	-	-	-	-	-	-	-	-	-	-	-	-	-	-	-	-	-	-	-	NP_005221.2	NP_005221	60	73.85	65	26	0	21	85	21	85	6e-20	90.9	IPR000418; IPR011991	Y	ELK3	9606 [Organism: human] [Scientific Name: Homo sapiens]	Y	27	-	-	-	-	-	-	-	-	-	-
-	-	-	-	-	-	-	-	-	-	-	-	-	-	-	-	-	-	-	-	-	NP_005221.2	NP_005221	60	73.85	65	26	0	21	85	21	85	6e-20	90.9	IPR000418; IPR011991	Y	ELK3	9606 [Organism: human] [Scientific Name: Homo sapiens]	Y	27	-	-	-	-	-	-	-	-	-	-
-	-	-	-	-	-	-	-	-	-	-	-	-	-	-	-	-	-	-	-	-	NP_005221.2	NP_005221	60	73.85	65	26	0	21	85	21	85	6e-20	90.9	IPR000418; IPR011991	Y	ELK3	9606 [Organism: human] [Scientific Name: Homo sapiens]	Y	27	-	-	-	-	-	-	-	-	-	-
-	-	-	-	-	-	-	-	-	-	-	-	-	-	-	-	-	-	-	-	-	NP_005221.2	NP_005221	60	73.85	65	26	0	21	85	21	85	6e-20	90.9	IPR000418; IPR011991	Y	ELK3	9606 [Organism: human] [Scientific Name: Homo sapiens]	Y	27	-	-	-	-	-	-	-	-	-	-
-	-	-	-	-	-	-	-	-	-	-	-	-	-	-	-	-	-	-	-	-	NP_005221.2	NP_005221	60	73.85	65	26	0	21	85	21	85	6e-20	90.9	IPR000418; IPR011991	Y	ELK3	9606 [Organism: human] [Scientific Name: Homo sapiens]	Y	27	-	-	-	-	-	-	-	-	-	-
-	-	-	-	-	-	-	-	-	-	-	-	-	-	-	-	-	-	-	-	-	NP_005221.2	NP_005221	60	73.85	65	26	0	21	85	21	85	6e-20	90.9	IPR000418; IPR011991	Y	ELK3	9606 [Organism: human] [Scientific Name: Homo sapiens]	Y	27	-	-	-	-	-	-	-	-	-	-
-	-	-	-	-	-	-	-	-	-	-	-	-	-	-	-	-	-	-	-	-	NP_005221.2	NP_005221	60	73.85	65	26	0	21	85	21	85	6e-20	90.9	IPR000418; IPR011991	Y	ELK3	9606 [Organism: human] [Scientific Name: Homo sapiens]	Y	27	-	-	-	-	-	-	-	-	-	-
-	-	-	-	-	-	-	-	-	-	-	-	-	-	-	-	-	-	-	-	-	NP_005221.2	NP_005221	60	73.85	65	26	0	21	85	21	85	6e-20	90.9	IPR000418; IPR011991	Y	ELK3	9606 [Organism: human] [Scientific Name: Homo sapiens]	Y	27	-	-	-	-	-	-	-	-	-	-
-	-	-	-	-	-	-	-	-	-	-	-	-	-	-	-	-	-	-	-	-	NP_005221.2	NP_005221	60	73.85	65	26	0	21	85	21	85	6e-20	90.9	IPR000418; IPR011991	Y	ELK3	9606 [Organism: human] [Scientific Name: Homo sapiens]	Y	27	-	-	-	-	-	-	-	-	-	-
-	-	-	-	-	-	-	-	-	-	-	-	-	-	-	-	-	-	-	-	-	NP_005221.2	NP_005221	60	73.85	65	26	0	21	85	21	85	6e-20	90.9	IPR000418; IPR011991	Y	ELK3	9606 [Organism: human] [Scientific Name: Homo sapiens]	Y	27	-	-	-	-	-	-	-	-	-	-
-	-	-	-	-	-	-	-	-	-	-	-	-	-	-	-	-	-	-	-	-	NP_005221.2	NP_005221	60	73.85	65	26	0	21	85	21	85	6e-20	90.9	IPR000418; IPR011991	Y	ELK3	9606 [Organism: human] [Scientific Name: Homo sapiens]	Y	27	-	-	-	-	-	-	-	-	-	-
-	-	-	-	-	-	-	-	-	-	-	-	-	-	-	-	-	-	-	-	-	NP_005221.2	NP_005221	60	73.85	65	26	0	21	85	21	85	6e-20	90.9	IPR000418; IPR011991	Y	ELK3	9606 [Organism: human] [Scientific Name: Homo sapiens]	Y	27	-	-	-	-	-	-	-	-	-	-
-	-	-	-	-	-	-	-	-	-	-	-	-	-	-	-	-	-	-	-	-	NP_005221.2	NP_005221	60	73.85	65	26	0	21	85	21	85	6e-20	90.9	IPR000418; IPR011991	Y	ELK3	9606 [Organism: human] [Scientific Name: Homo sapiens]	Y	27	-	-	-	-	-	-	-	-	-	-
-	-	-	-	-	-	-	-	-	-	-	-	-	-	-	-	-	-	-	-	-	NP_005221.2	NP_005221	60	73.85	65	26	0	21	85	21	85	6e-20	90.9	IPR000418; IPR011991	Y	ELK3	9606 [Organism: human] [Scientific Name: Homo sapiens]	Y	27	-	-	-	-	-	-	-	-	-	-
-	-	-	-	-	-	-	-	-	-	-	-	-	-	-	-	-	-	-	-	-	NP_005221.2	NP_005221	60	73.85	65	26	0	21	85	21	85	6e-20	90.9	IPR000418; IPR011991	Y	ELK3	9606 [Organism: human] [Scientific Name: Homo sapiens]	Y	27	-	-	-	-	-	-	-	-	-	-
-	-	-	-	-	-	-	-	-	-	-	-	-	-	-	-	-	-	-	-	-	NP_005221.2	NP_005221	60	73.85	65	26	0	21	85	21	85	6e-20	90.9	IPR000418; IPR011991	Y	ELK3	9606 [Organism: human] [Scientific Name: Homo sapiens]	Y	27	-	-	-	-	-	-	-	-	-	-
-	-	-	-	-	-	-	-	-	-	-	-	-	-	-	-	-	-	-	-	-	NP_005221.2	NP_005221	60	73.85	65	26	0	21	85	21	85	6e-20	90.9	IPR000418; IPR011991	Y	ELK3	9606 [Organism: human] [Scientific Name: Homo sapiens]	Y	27	-	-	-	-	-	-	-	-	-	-
-	-	-	-	-	-	-	-	-	-	-	-	-	-	-	-	-	-	-	-	-	NP_005221.2	NP_005221	60	73.85	65	26	0	21	85	21	85	6e-20	90.9	IPR000418; IPR011991	Y	ELK3	9606 [Organism: human] [Scientific Name: Homo sapiens]	Y	27	-	-	-	-	-	-	-	-	-	-
-	-	-	-	-	-	-	-	-	-	-	-	-	-	-	-	-	-	-	-	-	NP_005221.2	NP_005221	60	73.85	65	26	0	21	85	21	85	6e-20	90.9	IPR000418; IPR011991	Y	ELK3	9606 [Organism: human] [Scientific Name: Homo sapiens]	Y	27	-	-	-	-	-	-	-	-	-	-
-	-	-	-	-	-	-	-	-	-	-	-	-	-	-	-	-	-	-	-	-	NP_005221.2	NP_005221	60	73.85	65	26	0	21	85	21	85	6e-20	90.9	IPR000418; IPR011991	Y	ELK3	9606 [Organism: human] [Scientific Name: Homo sapiens]	Y	27	-	-	-	-	-	-	-	-	-	-
-	-	-	-	-	-	-	-	-	-	-	-	-	-	-	-	-	-	-	-	-	NP_005221.2	NP_005221	60	73.85	65	26	0	21	85	21	85	6e-20	90.9	IPR000418; IPR011991	Y	ELK3	9606 [Organism: human] [Scientific Name: Homo sapiens]	Y	27	-	-	-	-	-	-	-	-	-	-
-	-	-	-	-	-	-	-	-	-	-	-	-	-	-	-	-	-	-	-	-	NP_005221.2	NP_005221	60	73.85	65	26	0	21	85	21	85	6e-20	90.9	IPR000418; IPR011991	Y	ELK3	9606 [Organism: human] [Scientific Name: Homo sapiens]	Y	27	-	-	-	-	-	-	-	-	-	-
-	-	-	-	-	-	-	-	-	-	-	-	-	-	-	-	-	-	-	-	-	NP_005221.2	NP_005221	60	73.85	65	26	0	21	85	21	85	6e-20	90.9	IPR000418; IPR011991	Y	ELK3	9606 [Organism: human] [Scientific Name: Homo sapiens]	Y	27	-	-	-	-	-	-	-	-	-	-
-	-	-	-	-	-	-	-	-	-	-	-	-	-	-	-	-	-	-	-	-	NP_005221.2	NP_005221	60	73.85	65	26	0	21	85	21	85	6e-20	90.9	IPR000418; IPR011991	Y	ELK3	9606 [Organism: human] [Scientific Name: Homo sapiens]	Y	27	-	-	-	-	-	-	-	-	-	-
-	-	-	-	-	-	-	-	-	-	-	-	-	-	-	-	-	-	-	-	-	NP_005221.2	NP_005221	60	73.85	65	26	0	21	85	21	85	6e-20	90.9	IPR000418; IPR011991	Y	ELK3	9606 [Organism: human] [Scientific Name: Homo sapiens]	Y	27	-	-	-	-	-	-	-	-	-	-
-	-	-	-	-	-	-	-	-	-	-	-	-	-	-	-	-	-	-	-	-	NP_005221.2	NP_005221	60	73.85	65	26	0	21	85	21	85	6e-20	90.9	IPR000418; IPR011991	Y	ELK3	9606 [Organism: human] [Scientific Name: Homo sapiens]	Y	27	-	-	-	-	-	-	-	-	-	-
-	-	-	-	-	-	-	-	-	-	-	-	-	-	-	-	-	-	-	-	-	NP_005221.2	NP_005221	60	73.85	65	26	0	21	85	21	85	6e-20	90.9	IPR000418; IPR011991	Y	ELK3	9606 [Organism: human] [Scientific Name: Homo sapiens]	Y	27	-	-	-	-	-	-	-	-	-	-
-	-	-	-	-	-	-	-	-	-	-	-	-	-	-	-	-	-	-	-	-	NP_005221.2	NP_005221	60	73.85	65	26	0	21	85	21	85	6e-20	90.9	IPR000418; IPR011991	Y	ELK3	9606 [Organism: human] [Scientific Name: Homo sapiens]	Y	27	-	-	-	-	-	-	-	-	-	-
-	-	-	-	-	-	-	-	-	-	-	-	-	-	-	-	-	-	-	-	-	NP_005221.2	NP_005221	60	73.85	65	26	0	21	85	21	85	6e-20	90.9	IPR000418; IPR011991	Y	ELK3	9606 [Organism: human] [Scientific Name: Homo sapiens]	Y	27	-	-	-	-	-	-	-	-	-	-
-	-	-	-	-	-	-	-	-	-	-	-	-	-	-	-	-	-	-	-	-	NP_005221.2	NP_005221	60	73.85	65	26	0	21	85	21	85	6e-20	90.9	IPR000418; IPR011991	Y	ELK3	9606 [Organism: human] [Scientific Name: Homo sapiens]	Y	27	-	-	-	-	-	-	-	-	-	-
-	-	-	-	-	-	-	-	-	-	-	-	-	-	-	-	-	-	-	-	-	NP_005221.2	NP_005221	60	73.85	65	26	0	21	85	21	85	6e-20	90.9	IPR000418; IPR011991	Y	ELK3	9606 [Organism: human] [Scientific Name: Homo sapiens]	Y	27	-	-	-	-	-	-	-	-	-	-
-	-	-	-	-	-	-	-	-	-	-	-	-	-	-	-	-	-	-	-	-	NP_005221.2	NP_005221	60	73.85	65	26	0	21	85	21	85	6e-20	90.9	IPR000418; IPR011991	Y	ELK3	9606 [Organism: human] [Scientific Name: Homo sapiens]	Y	27	-	-	-	-	-	-	-	-	-	-
-	-	-	-	-	-	-	-	-	-	-	-	-	-	-	-	-	-	-	-	-	NP_005221.2	NP_005221	60	73.85	65	26	0	21	85	21	85	6e-20	90.9	IPR000418; IPR011991	Y	ELK3	9606 [Organism: human] [Scientific Name: Homo sapiens]	Y	27	-	-	-	-	-	-	-	-	-	-
-	-	-	-	-	-	-	-	-	-	-	-	-	-	-	-	-	-	-	-	-	NP_005221.2	NP_005221	60	73.85	65	26	0	21	85	21	85	6e-20	90.9	IPR000418; IPR011991	Y	ELK3	9606 [Organism: human] [Scientific Name: Homo sapiens]	Y	27	-	-	-	-	-	-	-	-	-	-
-	-	-	-	-	-	-	-	-	-	-	-	-	-	-	-	-	-	-	-	-	NP_005221.2	NP_005221	60	73.85	65	26	0	21	85	21	85	6e-20	90.9	IPR000418; IPR011991	Y	ELK3	9606 [Organism: human] [Scientific Name: Homo sapiens]	Y	27	-	-	-	-	-	-	-	-	-	-
-	-	-	-	-	-	-	-	-	-	-	-	-	-	-	-	-	-	-	-	-	NP_005221.2	NP_005221	60	73.85	65	26	0	21	85	21	85	6e-20	90.9	IPR000418; IPR011991	Y	ELK3	9606 [Organism: human] [Scientific Name: Homo sapiens]	Y	27	-	-	-	-	-	-	-	-	-	-
-	-	-	-	-	-	-	-	-	-	-	-	-	-	-	-	-	-	-	-	-	NP_005221.2	NP_005221	60	73.85	65	26	0	21	85	21	85	6e-20	90.9	IPR000418; IPR011991	Y	ELK3	9606 [Organism: human] [Scientific Name: Homo sapiens]	Y	27	-	-	-	-	-	-	-	-	-	-
-	-	-	-	-	-	-	-	-	-	-	-	-	-	-	-	-	-	-	-	-	NP_005221.2	NP_005221	60	73.85	65	26	0	21	85	21	85	6e-20	90.9	IPR000418; IPR011991	Y	ELK3	9606 [Organism: human] [Scientific Name: Homo sapiens]	Y	27	-	-	-	-	-	-	-	-	-	-
-	-	-	-	-	-	-	-	-	-	-	-	-	-	-	-	-	-	-	-	-	NP_005221.2	NP_005221	60	73.85	65	26	0	21	85	21	85	6e-20	90.9	IPR000418; IPR011991	Y	ELK3	9606 [Organism: human] [Scientific Name: Homo sapiens]	Y	27	-	-	-	-	-	-	-	-	-	-
-	-	-	-	-	-	-	-	-	-	-	-	-	-	-	-	-	-	-	-	-	NP_005221.2	NP_005221	60	73.85	65	26	0	21	85	21	85	6e-20	90.9	IPR000418; IPR011991	Y	ELK3	9606 [Organism: human] [Scientific Name: Homo sapiens]	Y	27	-	-	-	-	-	-	-	-	-	-
-	-	-	-	-	-	-	-	-	-	-	-	-	-	-	-	-	-	-	-	-	NP_005221.2	NP_005221	60	73.85	65	26	0	21	85	21	85	6e-20	90.9	IPR000418; IPR011991	Y	ELK3	9606 [Organism: human] [Scientific Name: Homo sapiens]	Y	27	-	-	-	-	-	-	-	-	-	-
-	-	-	-	-	-	-	-	-	-	-	-	-	-	-	-	-	-	-	-	-	NP_005221.2	NP_005221	60	73.85	65	26	0	21	85	21	85	6e-20	90.9	IPR000418; IPR011991	Y	ELK3	9606 [Organism: human] [Scientific Name: Homo sapiens]	Y	27	-	-	-	-	-	-	-	-	-	-
-	-	-	-	-	-	-	-	-	-	-	-	-	-	-	-	-	-	-	-	-	NP_005221.2	NP_005221	60	73.85	65	26	0	21	85	21	85	6e-20	90.9	IPR000418; IPR011991	Y	ELK3	9606 [Organism: human] [Scientific Name: Homo sapiens]	Y	27	-	-	-	-	-	-	-	-	-	-
-	-	-	-	-	-	-	-	-	-	-	-	-	-	-	-	-	-	-	-	-	NP_005221.2	NP_005221	60	73.85	65	26	0	21	85	21	85	6e-20	90.9	IPR000418; IPR011991	Y	ELK3	9606 [Organism: human] [Scientific Name: Homo sapiens]	Y	27	-	-	-	-	-	-	-	-	-	-
-	-	-	-	-	-	-	-	-	-	-	-	-	-	-	-	-	-	-	-	-	NP_005221.2	NP_005221	60	73.85	65	26	0	21	85	21	85	6e-20	90.9	IPR000418; IPR011991	Y	ELK3	9606 [Organism: human] [Scientific Name: Homo sapiens]	Y	27	-	-	-	-	-	-	-	-	-	-
-	-	-	-	-	-	-	-	-	-	-	-	-	-	-	-	-	-	-	-	-	NP_005221.2	NP_005221	60	73.85	65	26	0	21	85	21	85	6e-20	90.9	IPR000418; IPR011991	Y	ELK3	9606 [Organism: human] [Scientific Name: Homo sapiens]	Y	27	-	-	-	-	-	-	-	-	-	-
-	-	-	-	-	-	-	-	-	-	-	-	-	-	-	-	-	-	-	-	-	NP_005221.2	NP_005221	60	73.85	65	26	0	21	85	21	85	6e-20	90.9	IPR000418; IPR011991	Y	ELK3	9606 [Organism: human] [Scientific Name: Homo sapiens]	Y	27	-	-	-	-	-	-	-	-	-	-
-	-	-	-	-	-	-	-	-	-	-	-	-	-	-	-	-	-	-	-	-	NP_005221.2	NP_005221	60	73.85	65	26	0	21	85	21	85	6e-20	90.9	IPR000418; IPR011991	Y	ELK3	9606 [Organism: human] [Scientific Name: Homo sapiens]	Y	27	-	-	-	-	-	-	-	-	-	-
-	-	-	-	-	-	-	-	-	-	-	-	-	-	-	-	-	-	-	-	-	NP_005221.2	NP_005221	60	73.85	65	26	0	21	85	21	85	6e-20	90.9	IPR000418; IPR011991	Y	ELK3	9606 [Organism: human] [Scientific Name: Homo sapiens]	Y	27	-	-	-	-	-	-	-	-	-	-
4BNC	A	P50549	gi|520728590|pdb|4BNC|A	66.27	80.72	83	28	0	3	85	10	92	4e-36	120	15.9	0.7	82	95	66	MOLECULE: HUMAN ETV1;	NP_001156619.1	NP_001156619	66.27	80.72	83	28	0	3	85	310	392	7e-32	124	IPR006715; IPR011991; IPR000418	Y	ETV1	9606 [Organism: human] [Scientific Name: Homo sapiens]	Y	11	4CO8-A	-	-	-	-	-	-	-	-	-
4BNC	A	P50549	gi|520728590|pdb|4BNC|A	66.27	80.72	83	28	0	3	85	10	92	4e-36	120	15.9	0.7	82	95	66	MOLECULE: HUMAN ETV1;	NP_001156619.1	NP_001156619	66.27	80.72	83	28	0	3	85	310	392	7e-32	124	IPR006715; IPR011991; IPR000418	Y	ETV1	9606 [Organism: human] [Scientific Name: Homo sapiens]	Y	11	4CO8-A	-	-	-	-	-	-	-	-	-
4BNC	A	P50549	gi|520728590|pdb|4BNC|A	66.27	80.72	83	28	0	3	85	10	92	4e-36	120	15.9	0.7	82	95	66	MOLECULE: HUMAN ETV1;	NP_001156619.1	NP_001156619	66.27	80.72	83	28	0	3	85	310	392	7e-32	124	IPR006715; IPR011991; IPR000418	Y	ETV1	9606 [Organism: human] [Scientific Name: Homo sapiens]	Y	11	4CO8-A	-	-	-	-	-	-	-	-	-
4BNC	A	P50549	gi|520728590|pdb|4BNC|A	66.27	80.72	83	28	0	3	85	10	92	4e-36	120	15.9	0.7	82	95	66	MOLECULE: HUMAN ETV1;	NP_001156619.1	NP_001156619	66.27	80.72	83	28	0	3	85	310	392	7e-32	124	IPR006715; IPR011991; IPR000418	Y	ETV1	9606 [Organism: human] [Scientific Name: Homo sapiens]	Y	11	4CO8-A	-	-	-	-	-	-	-	-	-
4BNC	A	P50549	gi|520728590|pdb|4BNC|A	66.27	80.72	83	28	0	3	85	10	92	4e-36	120	15.9	0.7	82	95	66	MOLECULE: HUMAN ETV1;	NP_001156619.1	NP_001156619	66.27	80.72	83	28	0	3	85	310	392	7e-32	124	IPR006715; IPR011991; IPR000418	Y	ETV1	9606 [Organism: human] [Scientific Name: Homo sapiens]	Y	11	4CO8-A	-	-	-	-	-	-	-	-	-
4BNC	A	P50549	gi|520728590|pdb|4BNC|A	66.27	80.72	83	28	0	3	85	10	92	4e-36	120	15.9	0.7	82	95	66	MOLECULE: HUMAN ETV1;	NP_001156619.1	NP_001156619	66.27	80.72	83	28	0	3	85	310	392	7e-32	124	IPR006715; IPR011991; IPR000418	Y	ETV1	9606 [Organism: human] [Scientific Name: Homo sapiens]	Y	11	4CO8-A	-	-	-	-	-	-	-	-	-
4BNC	A	P50549	gi|520728590|pdb|4BNC|A	66.27	80.72	83	28	0	3	85	10	92	4e-36	120	15.9	0.7	82	95	66	MOLECULE: HUMAN ETV1;	NP_001156619.1	NP_001156619	66.27	80.72	83	28	0	3	85	310	392	7e-32	124	IPR006715; IPR011991; IPR000418	Y	ETV1	9606 [Organism: human] [Scientific Name: Homo sapiens]	Y	11	4CO8-A	-	-	-	-	-	-	-	-	-
4BNC	A	P50549	gi|520728590|pdb|4BNC|A	66.27	80.72	83	28	0	3	85	10	92	4e-36	120	15.9	0.7	82	95	66	MOLECULE: HUMAN ETV1;	NP_001156619.1	NP_001156619	66.27	80.72	83	28	0	3	85	310	392	7e-32	124	IPR006715; IPR011991; IPR000418	Y	ETV1	9606 [Organism: human] [Scientific Name: Homo sapiens]	Y	11	4CO8-A	-	-	-	-	-	-	-	-	-
4BNC	A	P50549	gi|520728590|pdb|4BNC|A	66.27	80.72	83	28	0	3	85	10	92	4e-36	120	15.9	0.7	82	95	66	MOLECULE: HUMAN ETV1;	NP_001156619.1	NP_001156619	66.27	80.72	83	28	0	3	85	310	392	7e-32	124	IPR006715; IPR011991; IPR000418	Y	ETV1	9606 [Organism: human] [Scientific Name: Homo sapiens]	Y	11	4CO8-A	-	-	-	-	-	-	-	-	-
4BNC	A	P50549	gi|520728590|pdb|4BNC|A	66.27	80.72	83	28	0	3	85	10	92	4e-36	120	15.9	0.7	82	95	66	MOLECULE: HUMAN ETV1;	NP_001156619.1	NP_001156619	66.27	80.72	83	28	0	3	85	310	392	7e-32	124	IPR006715; IPR011991; IPR000418	Y	ETV1	9606 [Organism: human] [Scientific Name: Homo sapiens]	Y	11	4CO8-A	-	-	-	-	-	-	-	-	-
4BNC	A	P50549	gi|520728590|pdb|4BNC|A	66.27	80.72	83	28	0	3	85	10	92	4e-36	120	15.9	0.7	82	95	66	MOLECULE: HUMAN ETV1;	NP_001156619.1	NP_001156619	66.27	80.72	83	28	0	3	85	310	392	7e-32	124	IPR006715; IPR011991; IPR000418	Y	ETV1	9606 [Organism: human] [Scientific Name: Homo sapiens]	Y	11	4CO8-A	-	-	-	-	-	-	-	-	-
4BNC	A	P50549	gi|520728590|pdb|4BNC|A	66.27	80.72	83	28	0	3	85	10	92	4e-36	120	15.9	0.7	82	95	66	MOLECULE: HUMAN ETV1;	NP_001156619.1	NP_001156619	66.27	80.72	83	28	0	3	85	310	392	7e-32	124	IPR006715; IPR011991; IPR000418	Y	ETV1	9606 [Organism: human] [Scientific Name: Homo sapiens]	Y	11	4CO8-A	-	-	-	-	-	-	-	-	-
4BNC	A	P50549	gi|520728590|pdb|4BNC|A	66.27	80.72	83	28	0	3	85	10	92	4e-36	120	15.9	0.7	82	95	66	MOLECULE: HUMAN ETV1;	NP_001156619.1	NP_001156619	66.27	80.72	83	28	0	3	85	310	392	7e-32	124	IPR006715; IPR011991; IPR000418	Y	ETV1	9606 [Organism: human] [Scientific Name: Homo sapiens]	Y	11	4CO8-A	-	-	-	-	-	-	-	-	-
4BNC	A	P50549	gi|520728590|pdb|4BNC|A	66.27	80.72	83	28	0	3	85	10	92	4e-36	120	15.9	0.7	82	95	66	MOLECULE: HUMAN ETV1;	NP_001156619.1	NP_001156619	66.27	80.72	83	28	0	3	85	310	392	7e-32	124	IPR006715; IPR011991; IPR000418	Y	ETV1	9606 [Organism: human] [Scientific Name: Homo sapiens]	Y	11	4CO8-A	-	-	-	-	-	-	-	-	-
4BNC	A	P50549	gi|520728590|pdb|4BNC|A	66.27	80.72	83	28	0	3	85	10	92	4e-36	120	15.9	0.7	82	95	66	MOLECULE: HUMAN ETV1;	NP_001156619.1	NP_001156619	66.27	80.72	83	28	0	3	85	310	392	7e-32	124	IPR006715; IPR011991; IPR000418	Y	ETV1	9606 [Organism: human] [Scientific Name: Homo sapiens]	Y	11	4CO8-A	-	-	-	-	-	-	-	-	-
4BNC	A	P50549	gi|520728590|pdb|4BNC|A	66.27	80.72	83	28	0	3	85	10	92	4e-36	120	15.9	0.7	82	95	66	MOLECULE: HUMAN ETV1;	NP_001156619.1	NP_001156619	66.27	80.72	83	28	0	3	85	310	392	7e-32	124	IPR006715; IPR011991; IPR000418	Y	ETV1	9606 [Organism: human] [Scientific Name: Homo sapiens]	Y	11	4CO8-A	-	-	-	-	-	-	-	-	-
4BNC	A	P50549	gi|520728590|pdb|4BNC|A	66.27	80.72	83	28	0	3	85	10	92	4e-36	120	15.9	0.7	82	95	66	MOLECULE: HUMAN ETV1;	NP_001156619.1	NP_001156619	66.27	80.72	83	28	0	3	85	310	392	7e-32	124	IPR006715; IPR011991; IPR000418	Y	ETV1	9606 [Organism: human] [Scientific Name: Homo sapiens]	Y	11	4CO8-A	-	-	-	-	-	-	-	-	-
4BNC	A	P50549	gi|520728590|pdb|4BNC|A	66.27	80.72	83	28	0	3	85	10	92	4e-36	120	15.9	0.7	82	95	66	MOLECULE: HUMAN ETV1;	NP_001156619.1	NP_001156619	66.27	80.72	83	28	0	3	85	310	392	7e-32	124	IPR006715; IPR011991; IPR000418	Y	ETV1	9606 [Organism: human] [Scientific Name: Homo sapiens]	Y	11	4CO8-A	-	-	-	-	-	-	-	-	-
4BNC	A	P50549	gi|520728590|pdb|4BNC|A	66.27	80.72	83	28	0	3	85	10	92	4e-36	120	15.9	0.7	82	95	66	MOLECULE: HUMAN ETV1;	NP_001156619.1	NP_001156619	66.27	80.72	83	28	0	3	85	310	392	7e-32	124	IPR006715; IPR011991; IPR000418	Y	ETV1	9606 [Organism: human] [Scientific Name: Homo sapiens]	Y	11	4CO8-A	-	-	-	-	-	-	-	-	-
4BNC	A	P50549	gi|520728590|pdb|4BNC|A	66.27	80.72	83	28	0	3	85	10	92	4e-36	120	15.9	0.7	82	95	66	MOLECULE: HUMAN ETV1;	NP_001156619.1	NP_001156619	66.27	80.72	83	28	0	3	85	310	392	7e-32	124	IPR006715; IPR011991; IPR000418	Y	ETV1	9606 [Organism: human] [Scientific Name: Homo sapiens]	Y	11	4CO8-A	-	-	-	-	-	-	-	-	-
4BNC	A	P50549	gi|520728590|pdb|4BNC|A	66.27	80.72	83	28	0	3	85	10	92	4e-36	120	15.9	0.7	82	95	66	MOLECULE: HUMAN ETV1;	NP_001156619.1	NP_001156619	66.27	80.72	83	28	0	3	85	310	392	7e-32	124	IPR006715; IPR011991; IPR000418	Y	ETV1	9606 [Organism: human] [Scientific Name: Homo sapiens]	Y	11	4CO8-A	-	-	-	-	-	-	-	-	-
4BNC	A	P50549	gi|520728590|pdb|4BNC|A	66.27	80.72	83	28	0	3	85	10	92	4e-36	120	15.9	0.7	82	95	66	MOLECULE: HUMAN ETV1;	NP_001156619.1	NP_001156619	66.27	80.72	83	28	0	3	85	310	392	7e-32	124	IPR006715; IPR011991; IPR000418	Y	ETV1	9606 [Organism: human] [Scientific Name: Homo sapiens]	Y	11	4CO8-A	-	-	-	-	-	-	-	-	-
4BNC	A	P50549	gi|520728590|pdb|4BNC|A	66.27	80.72	83	28	0	3	85	10	92	4e-36	120	15.9	0.7	82	95	66	MOLECULE: HUMAN ETV1;	NP_001156619.1	NP_001156619	66.27	80.72	83	28	0	3	85	310	392	7e-32	124	IPR006715; IPR011991; IPR000418	Y	ETV1	9606 [Organism: human] [Scientific Name: Homo sapiens]	Y	11	4CO8-A	-	-	-	-	-	-	-	-	-
4BNC	A	P50549	gi|520728590|pdb|4BNC|A	66.27	80.72	83	28	0	3	85	10	92	4e-36	120	15.9	0.7	82	95	66	MOLECULE: HUMAN ETV1;	NP_001156619.1	NP_001156619	66.27	80.72	83	28	0	3	85	310	392	7e-32	124	IPR006715; IPR011991; IPR000418	Y	ETV1	9606 [Organism: human] [Scientific Name: Homo sapiens]	Y	11	4CO8-A	-	-	-	-	-	-	-	-	-
4BNC	A	P50549	gi|520728590|pdb|4BNC|A	66.27	80.72	83	28	0	3	85	10	92	4e-36	120	15.9	0.7	82	95	66	MOLECULE: HUMAN ETV1;	NP_001156619.1	NP_001156619	66.27	80.72	83	28	0	3	85	310	392	7e-32	124	IPR006715; IPR011991; IPR000418	Y	ETV1	9606 [Organism: human] [Scientific Name: Homo sapiens]	Y	11	4CO8-A	-	-	-	-	-	-	-	-	-
4BNC	A	P50549	gi|520728590|pdb|4BNC|A	66.27	80.72	83	28	0	3	85	10	92	4e-36	120	15.9	0.7	82	95	66	MOLECULE: HUMAN ETV1;	NP_001156619.1	NP_001156619	66.27	80.72	83	28	0	3	85	310	392	7e-32	124	IPR006715; IPR011991; IPR000418	Y	ETV1	9606 [Organism: human] [Scientific Name: Homo sapiens]	Y	11	4CO8-A	-	-	-	-	-	-	-	-	-
4BNC	A	P50549	gi|520728590|pdb|4BNC|A	66.27	80.72	83	28	0	3	85	10	92	4e-36	120	15.9	0.7	82	95	66	MOLECULE: HUMAN ETV1;	NP_001156619.1	NP_001156619	66.27	80.72	83	28	0	3	85	310	392	7e-32	124	IPR006715; IPR011991; IPR000418	Y	ETV1	9606 [Organism: human] [Scientific Name: Homo sapiens]	Y	11	4CO8-A	-	-	-	-	-	-	-	-	-
4BNC	A	P50549	gi|520728590|pdb|4BNC|A	66.27	80.72	83	28	0	3	85	10	92	4e-36	120	15.9	0.7	82	95	66	MOLECULE: HUMAN ETV1;	NP_001156619.1	NP_001156619	66.27	80.72	83	28	0	3	85	310	392	7e-32	124	IPR006715; IPR011991; IPR000418	Y	ETV1	9606 [Organism: human] [Scientific Name: Homo sapiens]	Y	11	4CO8-A	-	-	-	-	-	-	-	-	-
4BNC	A	P50549	gi|520728590|pdb|4BNC|A	66.27	80.72	83	28	0	3	85	10	92	4e-36	120	15.9	0.7	82	95	66	MOLECULE: HUMAN ETV1;	NP_001156619.1	NP_001156619	66.27	80.72	83	28	0	3	85	310	392	7e-32	124	IPR006715; IPR011991; IPR000418	Y	ETV1	9606 [Organism: human] [Scientific Name: Homo sapiens]	Y	11	4CO8-A	-	-	-	-	-	-	-	-	-
4BNC	A	P50549	gi|520728590|pdb|4BNC|A	66.27	80.72	83	28	0	3	85	10	92	4e-36	120	15.9	0.7	82	95	66	MOLECULE: HUMAN ETV1;	NP_001156619.1	NP_001156619	66.27	80.72	83	28	0	3	85	310	392	7e-32	124	IPR006715; IPR011991; IPR000418	Y	ETV1	9606 [Organism: human] [Scientific Name: Homo sapiens]	Y	11	4CO8-A	-	-	-	-	-	-	-	-	-
4BNC	A	P50549	gi|520728590|pdb|4BNC|A	66.27	80.72	83	28	0	3	85	10	92	4e-36	120	15.9	0.7	82	95	66	MOLECULE: HUMAN ETV1;	NP_001156619.1	NP_001156619	66.27	80.72	83	28	0	3	85	310	392	7e-32	124	IPR006715; IPR011991; IPR000418	Y	ETV1	9606 [Organism: human] [Scientific Name: Homo sapiens]	Y	11	4CO8-A	-	-	-	-	-	-	-	-	-
4BNC	A	P50549	gi|520728590|pdb|4BNC|A	66.27	80.72	83	28	0	3	85	10	92	4e-36	120	15.9	0.7	82	95	66	MOLECULE: HUMAN ETV1;	NP_001156619.1	NP_001156619	66.27	80.72	83	28	0	3	85	310	392	7e-32	124	IPR006715; IPR011991; IPR000418	Y	ETV1	9606 [Organism: human] [Scientific Name: Homo sapiens]	Y	11	4CO8-A	-	-	-	-	-	-	-	-	-
4BNC	A	P50549	gi|520728590|pdb|4BNC|A	66.27	80.72	83	28	0	3	85	10	92	4e-36	120	15.9	0.7	82	95	66	MOLECULE: HUMAN ETV1;	NP_001156619.1	NP_001156619	66.27	80.72	83	28	0	3	85	310	392	7e-32	124	IPR006715; IPR011991; IPR000418	Y	ETV1	9606 [Organism: human] [Scientific Name: Homo sapiens]	Y	11	4CO8-A	-	-	-	-	-	-	-	-	-
4BNC	A	P50549	gi|520728590|pdb|4BNC|A	66.27	80.72	83	28	0	3	85	10	92	4e-36	120	15.9	0.7	82	95	66	MOLECULE: HUMAN ETV1;	NP_001156619.1	NP_001156619	66.27	80.72	83	28	0	3	85	310	392	7e-32	124	IPR006715; IPR011991; IPR000418	Y	ETV1	9606 [Organism: human] [Scientific Name: Homo sapiens]	Y	11	4CO8-A	-	-	-	-	-	-	-	-	-
4BNC	A	P50549	gi|520728590|pdb|4BNC|A	66.27	80.72	83	28	0	3	85	10	92	4e-36	120	15.9	0.7	82	95	66	MOLECULE: HUMAN ETV1;	NP_001156619.1	NP_001156619	66.27	80.72	83	28	0	3	85	310	392	7e-32	124	IPR006715; IPR011991; IPR000418	Y	ETV1	9606 [Organism: human] [Scientific Name: Homo sapiens]	Y	11	4CO8-A	-	-	-	-	-	-	-	-	-
4BNC	A	P50549	gi|520728590|pdb|4BNC|A	66.27	80.72	83	28	0	3	85	10	92	4e-36	120	15.9	0.7	82	95	66	MOLECULE: HUMAN ETV1;	NP_001156619.1	NP_001156619	66.27	80.72	83	28	0	3	85	310	392	7e-32	124	IPR006715; IPR011991; IPR000418	Y	ETV1	9606 [Organism: human] [Scientific Name: Homo sapiens]	Y	11	4CO8-A	-	-	-	-	-	-	-	-	-
4BNC	A	P50549	gi|520728590|pdb|4BNC|A	66.27	80.72	83	28	0	3	85	10	92	4e-36	120	15.9	0.7	82	95	66	MOLECULE: HUMAN ETV1;	NP_001156619.1	NP_001156619	66.27	80.72	83	28	0	3	85	310	392	7e-32	124	IPR006715; IPR011991; IPR000418	Y	ETV1	9606 [Organism: human] [Scientific Name: Homo sapiens]	Y	11	4CO8-A	-	-	-	-	-	-	-	-	-
4BNC	A	P50549	gi|520728590|pdb|4BNC|A	66.27	80.72	83	28	0	3	85	10	92	4e-36	120	15.9	0.7	82	95	66	MOLECULE: HUMAN ETV1;	NP_001156619.1	NP_001156619	66.27	80.72	83	28	0	3	85	310	392	7e-32	124	IPR006715; IPR011991; IPR000418	Y	ETV1	9606 [Organism: human] [Scientific Name: Homo sapiens]	Y	11	4CO8-A	-	-	-	-	-	-	-	-	-
4BNC	A	P50549	gi|520728590|pdb|4BNC|A	66.27	80.72	83	28	0	3	85	10	92	4e-36	120	15.9	0.7	82	95	66	MOLECULE: HUMAN ETV1;	NP_001156619.1	NP_001156619	66.27	80.72	83	28	0	3	85	310	392	7e-32	124	IPR006715; IPR011991; IPR000418	Y	ETV1	9606 [Organism: human] [Scientific Name: Homo sapiens]	Y	11	4CO8-A	-	-	-	-	-	-	-	-	-
4BNC	A	P50549	gi|520728590|pdb|4BNC|A	66.27	80.72	83	28	0	3	85	10	92	4e-36	120	15.9	0.7	82	95	66	MOLECULE: HUMAN ETV1;	NP_001156619.1	NP_001156619	66.27	80.72	83	28	0	3	85	310	392	7e-32	124	IPR006715; IPR011991; IPR000418	Y	ETV1	9606 [Organism: human] [Scientific Name: Homo sapiens]	Y	11	4CO8-A	-	-	-	-	-	-	-	-	-
4BNC	A	P50549	gi|520728590|pdb|4BNC|A	66.27	80.72	83	28	0	3	85	10	92	4e-36	120	15.9	0.7	82	95	66	MOLECULE: HUMAN ETV1;	NP_001156619.1	NP_001156619	66.27	80.72	83	28	0	3	85	310	392	7e-32	124	IPR006715; IPR011991; IPR000418	Y	ETV1	9606 [Organism: human] [Scientific Name: Homo sapiens]	Y	11	4CO8-A	-	-	-	-	-	-	-	-	-
4BNC	A	P50549	gi|520728590|pdb|4BNC|A	66.27	80.72	83	28	0	3	85	10	92	4e-36	120	15.9	0.7	82	95	66	MOLECULE: HUMAN ETV1;	NP_001156619.1	NP_001156619	66.27	80.72	83	28	0	3	85	310	392	7e-32	124	IPR006715; IPR011991; IPR000418	Y	ETV1	9606 [Organism: human] [Scientific Name: Homo sapiens]	Y	11	4CO8-A	-	-	-	-	-	-	-	-	-
4BNC	A	P50549	gi|520728590|pdb|4BNC|A	66.27	80.72	83	28	0	3	85	10	92	4e-36	120	15.9	0.7	82	95	66	MOLECULE: HUMAN ETV1;	NP_001156619.1	NP_001156619	66.27	80.72	83	28	0	3	85	310	392	7e-32	124	IPR006715; IPR011991; IPR000418	Y	ETV1	9606 [Organism: human] [Scientific Name: Homo sapiens]	Y	11	4CO8-A	-	-	-	-	-	-	-	-	-
4BNC	A	P50549	gi|520728590|pdb|4BNC|A	66.27	80.72	83	28	0	3	85	10	92	4e-36	120	15.9	0.7	82	95	66	MOLECULE: HUMAN ETV1;	NP_001156619.1	NP_001156619	66.27	80.72	83	28	0	3	85	310	392	7e-32	124	IPR006715; IPR011991; IPR000418	Y	ETV1	9606 [Organism: human] [Scientific Name: Homo sapiens]	Y	11	4CO8-A	-	-	-	-	-	-	-	-	-
4BNC	A	P50549	gi|520728590|pdb|4BNC|A	66.27	80.72	83	28	0	3	85	10	92	4e-36	120	15.9	0.7	82	95	66	MOLECULE: HUMAN ETV1;	NP_001156619.1	NP_001156619	66.27	80.72	83	28	0	3	85	310	392	7e-32	124	IPR006715; IPR011991; IPR000418	Y	ETV1	9606 [Organism: human] [Scientific Name: Homo sapiens]	Y	11	4CO8-A	-	-	-	-	-	-	-	-	-
4BNC	A	P50549	gi|520728590|pdb|4BNC|A	66.27	80.72	83	28	0	3	85	10	92	4e-36	120	15.9	0.7	82	95	66	MOLECULE: HUMAN ETV1;	NP_001156619.1	NP_001156619	66.27	80.72	83	28	0	3	85	310	392	7e-32	124	IPR006715; IPR011991; IPR000418	Y	ETV1	9606 [Organism: human] [Scientific Name: Homo sapiens]	Y	11	4CO8-A	-	-	-	-	-	-	-	-	-
4BNC	A	P50549	gi|520728590|pdb|4BNC|A	66.27	80.72	83	28	0	3	85	10	92	4e-36	120	15.9	0.7	82	95	66	MOLECULE: HUMAN ETV1;	NP_001156619.1	NP_001156619	66.27	80.72	83	28	0	3	85	310	392	7e-32	124	IPR006715; IPR011991; IPR000418	Y	ETV1	9606 [Organism: human] [Scientific Name: Homo sapiens]	Y	11	4CO8-A	-	-	-	-	-	-	-	-	-
4BNC	A	P50549	gi|520728590|pdb|4BNC|A	66.27	80.72	83	28	0	3	85	10	92	4e-36	120	15.9	0.7	82	95	66	MOLECULE: HUMAN ETV1;	NP_001156619.1	NP_001156619	66.27	80.72	83	28	0	3	85	310	392	7e-32	124	IPR006715; IPR011991; IPR000418	Y	ETV1	9606 [Organism: human] [Scientific Name: Homo sapiens]	Y	11	4CO8-A	-	-	-	-	-	-	-	-	-
4BNC	A	P50549	gi|520728590|pdb|4BNC|A	66.27	80.72	83	28	0	3	85	10	92	4e-36	120	15.9	0.7	82	95	66	MOLECULE: HUMAN ETV1;	NP_001156619.1	NP_001156619	66.27	80.72	83	28	0	3	85	310	392	7e-32	124	IPR006715; IPR011991; IPR000418	Y	ETV1	9606 [Organism: human] [Scientific Name: Homo sapiens]	Y	11	4CO8-A	-	-	-	-	-	-	-	-	-
4BNC	A	P50549	gi|520728590|pdb|4BNC|A	66.27	80.72	83	28	0	3	85	10	92	4e-36	120	15.9	0.7	82	95	66	MOLECULE: HUMAN ETV1;	NP_001156620.1	NP_001156620	66.27	80.72	83	28	0	3	85	315	397	5e-32	124	IPR006715; IPR011991; IPR000418	Y	ETV1	9606 [Organism: human] [Scientific Name: Homo sapiens]	Y	11	4CO8-A	-	-	-	-	-	-	-	-	-
4BNC	A	P50549	gi|520728590|pdb|4BNC|A	66.27	80.72	83	28	0	3	85	10	92	4e-36	120	15.9	0.7	82	95	66	MOLECULE: HUMAN ETV1;	NP_001156620.1	NP_001156620	66.27	80.72	83	28	0	3	85	315	397	5e-32	124	IPR006715; IPR011991; IPR000418	Y	ETV1	9606 [Organism: human] [Scientific Name: Homo sapiens]	Y	11	4CO8-A	-	-	-	-	-	-	-	-	-
4BNC	A	P50549	gi|520728590|pdb|4BNC|A	66.27	80.72	83	28	0	3	85	10	92	4e-36	120	15.9	0.7	82	95	66	MOLECULE: HUMAN ETV1;	NP_001156620.1	NP_001156620	66.27	80.72	83	28	0	3	85	315	397	5e-32	124	IPR006715; IPR011991; IPR000418	Y	ETV1	9606 [Organism: human] [Scientific Name: Homo sapiens]	Y	11	4CO8-A	-	-	-	-	-	-	-	-	-
4BNC	A	P50549	gi|520728590|pdb|4BNC|A	66.27	80.72	83	28	0	3	85	10	92	4e-36	120	15.9	0.7	82	95	66	MOLECULE: HUMAN ETV1;	NP_001156620.1	NP_001156620	66.27	80.72	83	28	0	3	85	315	397	5e-32	124	IPR006715; IPR011991; IPR000418	Y	ETV1	9606 [Organism: human] [Scientific Name: Homo sapiens]	Y	11	4CO8-A	-	-	-	-	-	-	-	-	-
4BNC	A	P50549	gi|520728590|pdb|4BNC|A	66.27	80.72	83	28	0	3	85	10	92	4e-36	120	15.9	0.7	82	95	66	MOLECULE: HUMAN ETV1;	NP_001156620.1	NP_001156620	66.27	80.72	83	28	0	3	85	315	397	5e-32	124	IPR006715; IPR011991; IPR000418	Y	ETV1	9606 [Organism: human] [Scientific Name: Homo sapiens]	Y	11	4CO8-A	-	-	-	-	-	-	-	-	-
4BNC	A	P50549	gi|520728590|pdb|4BNC|A	66.27	80.72	83	28	0	3	85	10	92	4e-36	120	15.9	0.7	82	95	66	MOLECULE: HUMAN ETV1;	NP_001156620.1	NP_001156620	66.27	80.72	83	28	0	3	85	315	397	5e-32	124	IPR006715; IPR011991; IPR000418	Y	ETV1	9606 [Organism: human] [Scientific Name: Homo sapiens]	Y	11	4CO8-A	-	-	-	-	-	-	-	-	-
4BNC	A	P50549	gi|520728590|pdb|4BNC|A	66.27	80.72	83	28	0	3	85	10	92	4e-36	120	15.9	0.7	82	95	66	MOLECULE: HUMAN ETV1;	NP_001156620.1	NP_001156620	66.27	80.72	83	28	0	3	85	315	397	5e-32	124	IPR006715; IPR011991; IPR000418	Y	ETV1	9606 [Organism: human] [Scientific Name: Homo sapiens]	Y	11	4CO8-A	-	-	-	-	-	-	-	-	-
4BNC	A	P50549	gi|520728590|pdb|4BNC|A	66.27	80.72	83	28	0	3	85	10	92	4e-36	120	15.9	0.7	82	95	66	MOLECULE: HUMAN ETV1;	NP_001156620.1	NP_001156620	66.27	80.72	83	28	0	3	85	315	397	5e-32	124	IPR006715; IPR011991; IPR000418	Y	ETV1	9606 [Organism: human] [Scientific Name: Homo sapiens]	Y	11	4CO8-A	-	-	-	-	-	-	-	-	-
4BNC	A	P50549	gi|520728590|pdb|4BNC|A	66.27	80.72	83	28	0	3	85	10	92	4e-36	120	15.9	0.7	82	95	66	MOLECULE: HUMAN ETV1;	NP_001156620.1	NP_001156620	66.27	80.72	83	28	0	3	85	315	397	5e-32	124	IPR006715; IPR011991; IPR000418	Y	ETV1	9606 [Organism: human] [Scientific Name: Homo sapiens]	Y	11	4CO8-A	-	-	-	-	-	-	-	-	-
4BNC	A	P50549	gi|520728590|pdb|4BNC|A	66.27	80.72	83	28	0	3	85	10	92	4e-36	120	15.9	0.7	82	95	66	MOLECULE: HUMAN ETV1;	NP_001156620.1	NP_001156620	66.27	80.72	83	28	0	3	85	315	397	5e-32	124	IPR006715; IPR011991; IPR000418	Y	ETV1	9606 [Organism: human] [Scientific Name: Homo sapiens]	Y	11	4CO8-A	-	-	-	-	-	-	-	-	-
4BNC	A	P50549	gi|520728590|pdb|4BNC|A	66.27	80.72	83	28	0	3	85	10	92	4e-36	120	15.9	0.7	82	95	66	MOLECULE: HUMAN ETV1;	NP_001156620.1	NP_001156620	66.27	80.72	83	28	0	3	85	315	397	5e-32	124	IPR006715; IPR011991; IPR000418	Y	ETV1	9606 [Organism: human] [Scientific Name: Homo sapiens]	Y	11	4CO8-A	-	-	-	-	-	-	-	-	-
4BNC	A	P50549	gi|520728590|pdb|4BNC|A	66.27	80.72	83	28	0	3	85	10	92	4e-36	120	15.9	0.7	82	95	66	MOLECULE: HUMAN ETV1;	NP_001156620.1	NP_001156620	66.27	80.72	83	28	0	3	85	315	397	5e-32	124	IPR006715; IPR011991; IPR000418	Y	ETV1	9606 [Organism: human] [Scientific Name: Homo sapiens]	Y	11	4CO8-A	-	-	-	-	-	-	-	-	-
4BNC	A	P50549	gi|520728590|pdb|4BNC|A	66.27	80.72	83	28	0	3	85	10	92	4e-36	120	15.9	0.7	82	95	66	MOLECULE: HUMAN ETV1;	NP_001156620.1	NP_001156620	66.27	80.72	83	28	0	3	85	315	397	5e-32	124	IPR006715; IPR011991; IPR000418	Y	ETV1	9606 [Organism: human] [Scientific Name: Homo sapiens]	Y	11	4CO8-A	-	-	-	-	-	-	-	-	-
4BNC	A	P50549	gi|520728590|pdb|4BNC|A	66.27	80.72	83	28	0	3	85	10	92	4e-36	120	15.9	0.7	82	95	66	MOLECULE: HUMAN ETV1;	NP_001156620.1	NP_001156620	66.27	80.72	83	28	0	3	85	315	397	5e-32	124	IPR006715; IPR011991; IPR000418	Y	ETV1	9606 [Organism: human] [Scientific Name: Homo sapiens]	Y	11	4CO8-A	-	-	-	-	-	-	-	-	-
4BNC	A	P50549	gi|520728590|pdb|4BNC|A	66.27	80.72	83	28	0	3	85	10	92	4e-36	120	15.9	0.7	82	95	66	MOLECULE: HUMAN ETV1;	NP_001156620.1	NP_001156620	66.27	80.72	83	28	0	3	85	315	397	5e-32	124	IPR006715; IPR011991; IPR000418	Y	ETV1	9606 [Organism: human] [Scientific Name: Homo sapiens]	Y	11	4CO8-A	-	-	-	-	-	-	-	-	-
4BNC	A	P50549	gi|520728590|pdb|4BNC|A	66.27	80.72	83	28	0	3	85	10	92	4e-36	120	15.9	0.7	82	95	66	MOLECULE: HUMAN ETV1;	NP_001156620.1	NP_001156620	66.27	80.72	83	28	0	3	85	315	397	5e-32	124	IPR006715; IPR011991; IPR000418	Y	ETV1	9606 [Organism: human] [Scientific Name: Homo sapiens]	Y	11	4CO8-A	-	-	-	-	-	-	-	-	-
4BNC	A	P50549	gi|520728590|pdb|4BNC|A	66.27	80.72	83	28	0	3	85	10	92	4e-36	120	15.9	0.7	82	95	66	MOLECULE: HUMAN ETV1;	NP_001156620.1	NP_001156620	66.27	80.72	83	28	0	3	85	315	397	5e-32	124	IPR006715; IPR011991; IPR000418	Y	ETV1	9606 [Organism: human] [Scientific Name: Homo sapiens]	Y	11	4CO8-A	-	-	-	-	-	-	-	-	-
4BNC	A	P50549	gi|520728590|pdb|4BNC|A	66.27	80.72	83	28	0	3	85	10	92	4e-36	120	15.9	0.7	82	95	66	MOLECULE: HUMAN ETV1;	NP_001156620.1	NP_001156620	66.27	80.72	83	28	0	3	85	315	397	5e-32	124	IPR006715; IPR011991; IPR000418	Y	ETV1	9606 [Organism: human] [Scientific Name: Homo sapiens]	Y	11	4CO8-A	-	-	-	-	-	-	-	-	-
4BNC	A	P50549	gi|520728590|pdb|4BNC|A	66.27	80.72	83	28	0	3	85	10	92	4e-36	120	15.9	0.7	82	95	66	MOLECULE: HUMAN ETV1;	NP_001156620.1	NP_001156620	66.27	80.72	83	28	0	3	85	315	397	5e-32	124	IPR006715; IPR011991; IPR000418	Y	ETV1	9606 [Organism: human] [Scientific Name: Homo sapiens]	Y	11	4CO8-A	-	-	-	-	-	-	-	-	-
4BNC	A	P50549	gi|520728590|pdb|4BNC|A	66.27	80.72	83	28	0	3	85	10	92	4e-36	120	15.9	0.7	82	95	66	MOLECULE: HUMAN ETV1;	NP_001156620.1	NP_001156620	66.27	80.72	83	28	0	3	85	315	397	5e-32	124	IPR006715; IPR011991; IPR000418	Y	ETV1	9606 [Organism: human] [Scientific Name: Homo sapiens]	Y	11	4CO8-A	-	-	-	-	-	-	-	-	-
4BNC	A	P50549	gi|520728590|pdb|4BNC|A	66.27	80.72	83	28	0	3	85	10	92	4e-36	120	15.9	0.7	82	95	66	MOLECULE: HUMAN ETV1;	NP_001156620.1	NP_001156620	66.27	80.72	83	28	0	3	85	315	397	5e-32	124	IPR006715; IPR011991; IPR000418	Y	ETV1	9606 [Organism: human] [Scientific Name: Homo sapiens]	Y	11	4CO8-A	-	-	-	-	-	-	-	-	-
4BNC	A	P50549	gi|520728590|pdb|4BNC|A	66.27	80.72	83	28	0	3	85	10	92	4e-36	120	15.9	0.7	82	95	66	MOLECULE: HUMAN ETV1;	NP_001156620.1	NP_001156620	66.27	80.72	83	28	0	3	85	315	397	5e-32	124	IPR006715; IPR011991; IPR000418	Y	ETV1	9606 [Organism: human] [Scientific Name: Homo sapiens]	Y	11	4CO8-A	-	-	-	-	-	-	-	-	-
4BNC	A	P50549	gi|520728590|pdb|4BNC|A	66.27	80.72	83	28	0	3	85	10	92	4e-36	120	15.9	0.7	82	95	66	MOLECULE: HUMAN ETV1;	NP_001156620.1	NP_001156620	66.27	80.72	83	28	0	3	85	315	397	5e-32	124	IPR006715; IPR011991; IPR000418	Y	ETV1	9606 [Organism: human] [Scientific Name: Homo sapiens]	Y	11	4CO8-A	-	-	-	-	-	-	-	-	-
4BNC	A	P50549	gi|520728590|pdb|4BNC|A	66.27	80.72	83	28	0	3	85	10	92	4e-36	120	15.9	0.7	82	95	66	MOLECULE: HUMAN ETV1;	NP_001156620.1	NP_001156620	66.27	80.72	83	28	0	3	85	315	397	5e-32	124	IPR006715; IPR011991; IPR000418	Y	ETV1	9606 [Organism: human] [Scientific Name: Homo sapiens]	Y	11	4CO8-A	-	-	-	-	-	-	-	-	-
4BNC	A	P50549	gi|520728590|pdb|4BNC|A	66.27	80.72	83	28	0	3	85	10	92	4e-36	120	15.9	0.7	82	95	66	MOLECULE: HUMAN ETV1;	NP_001156620.1	NP_001156620	66.27	80.72	83	28	0	3	85	315	397	5e-32	124	IPR006715; IPR011991; IPR000418	Y	ETV1	9606 [Organism: human] [Scientific Name: Homo sapiens]	Y	11	4CO8-A	-	-	-	-	-	-	-	-	-
4BNC	A	P50549	gi|520728590|pdb|4BNC|A	66.27	80.72	83	28	0	3	85	10	92	4e-36	120	15.9	0.7	82	95	66	MOLECULE: HUMAN ETV1;	NP_001156620.1	NP_001156620	66.27	80.72	83	28	0	3	85	315	397	5e-32	124	IPR006715; IPR011991; IPR000418	Y	ETV1	9606 [Organism: human] [Scientific Name: Homo sapiens]	Y	11	4CO8-A	-	-	-	-	-	-	-	-	-
4BNC	A	P50549	gi|520728590|pdb|4BNC|A	66.27	80.72	83	28	0	3	85	10	92	4e-36	120	15.9	0.7	82	95	66	MOLECULE: HUMAN ETV1;	NP_001156620.1	NP_001156620	66.27	80.72	83	28	0	3	85	315	397	5e-32	124	IPR006715; IPR011991; IPR000418	Y	ETV1	9606 [Organism: human] [Scientific Name: Homo sapiens]	Y	11	4CO8-A	-	-	-	-	-	-	-	-	-
4BNC	A	P50549	gi|520728590|pdb|4BNC|A	66.27	80.72	83	28	0	3	85	10	92	4e-36	120	15.9	0.7	82	95	66	MOLECULE: HUMAN ETV1;	NP_001156620.1	NP_001156620	66.27	80.72	83	28	0	3	85	315	397	5e-32	124	IPR006715; IPR011991; IPR000418	Y	ETV1	9606 [Organism: human] [Scientific Name: Homo sapiens]	Y	11	4CO8-A	-	-	-	-	-	-	-	-	-
4BNC	A	P50549	gi|520728590|pdb|4BNC|A	66.27	80.72	83	28	0	3	85	10	92	4e-36	120	15.9	0.7	82	95	66	MOLECULE: HUMAN ETV1;	NP_001156620.1	NP_001156620	66.27	80.72	83	28	0	3	85	315	397	5e-32	124	IPR006715; IPR011991; IPR000418	Y	ETV1	9606 [Organism: human] [Scientific Name: Homo sapiens]	Y	11	4CO8-A	-	-	-	-	-	-	-	-	-
4BNC	A	P50549	gi|520728590|pdb|4BNC|A	66.27	80.72	83	28	0	3	85	10	92	4e-36	120	15.9	0.7	82	95	66	MOLECULE: HUMAN ETV1;	NP_001156620.1	NP_001156620	66.27	80.72	83	28	0	3	85	315	397	5e-32	124	IPR006715; IPR011991; IPR000418	Y	ETV1	9606 [Organism: human] [Scientific Name: Homo sapiens]	Y	11	4CO8-A	-	-	-	-	-	-	-	-	-
4BNC	A	P50549	gi|520728590|pdb|4BNC|A	66.27	80.72	83	28	0	3	85	10	92	4e-36	120	15.9	0.7	82	95	66	MOLECULE: HUMAN ETV1;	NP_001156620.1	NP_001156620	66.27	80.72	83	28	0	3	85	315	397	5e-32	124	IPR006715; IPR011991; IPR000418	Y	ETV1	9606 [Organism: human] [Scientific Name: Homo sapiens]	Y	11	4CO8-A	-	-	-	-	-	-	-	-	-
4BNC	A	P50549	gi|520728590|pdb|4BNC|A	66.27	80.72	83	28	0	3	85	10	92	4e-36	120	15.9	0.7	82	95	66	MOLECULE: HUMAN ETV1;	NP_001156620.1	NP_001156620	66.27	80.72	83	28	0	3	85	315	397	5e-32	124	IPR006715; IPR011991; IPR000418	Y	ETV1	9606 [Organism: human] [Scientific Name: Homo sapiens]	Y	11	4CO8-A	-	-	-	-	-	-	-	-	-
4BNC	A	P50549	gi|520728590|pdb|4BNC|A	66.27	80.72	83	28	0	3	85	10	92	4e-36	120	15.9	0.7	82	95	66	MOLECULE: HUMAN ETV1;	NP_001156620.1	NP_001156620	66.27	80.72	83	28	0	3	85	315	397	5e-32	124	IPR006715; IPR011991; IPR000418	Y	ETV1	9606 [Organism: human] [Scientific Name: Homo sapiens]	Y	11	4CO8-A	-	-	-	-	-	-	-	-	-
4BNC	A	P50549	gi|520728590|pdb|4BNC|A	66.27	80.72	83	28	0	3	85	10	92	4e-36	120	15.9	0.7	82	95	66	MOLECULE: HUMAN ETV1;	NP_001156620.1	NP_001156620	66.27	80.72	83	28	0	3	85	315	397	5e-32	124	IPR006715; IPR011991; IPR000418	Y	ETV1	9606 [Organism: human] [Scientific Name: Homo sapiens]	Y	11	4CO8-A	-	-	-	-	-	-	-	-	-
4BNC	A	P50549	gi|520728590|pdb|4BNC|A	66.27	80.72	83	28	0	3	85	10	92	4e-36	120	15.9	0.7	82	95	66	MOLECULE: HUMAN ETV1;	NP_001156620.1	NP_001156620	66.27	80.72	83	28	0	3	85	315	397	5e-32	124	IPR006715; IPR011991; IPR000418	Y	ETV1	9606 [Organism: human] [Scientific Name: Homo sapiens]	Y	11	4CO8-A	-	-	-	-	-	-	-	-	-
4BNC	A	P50549	gi|520728590|pdb|4BNC|A	66.27	80.72	83	28	0	3	85	10	92	4e-36	120	15.9	0.7	82	95	66	MOLECULE: HUMAN ETV1;	NP_001156620.1	NP_001156620	66.27	80.72	83	28	0	3	85	315	397	5e-32	124	IPR006715; IPR011991; IPR000418	Y	ETV1	9606 [Organism: human] [Scientific Name: Homo sapiens]	Y	11	4CO8-A	-	-	-	-	-	-	-	-	-
4BNC	A	P50549	gi|520728590|pdb|4BNC|A	66.27	80.72	83	28	0	3	85	10	92	4e-36	120	15.9	0.7	82	95	66	MOLECULE: HUMAN ETV1;	NP_001156620.1	NP_001156620	66.27	80.72	83	28	0	3	85	315	397	5e-32	124	IPR006715; IPR011991; IPR000418	Y	ETV1	9606 [Organism: human] [Scientific Name: Homo sapiens]	Y	11	4CO8-A	-	-	-	-	-	-	-	-	-
4BNC	A	P50549	gi|520728590|pdb|4BNC|A	66.27	80.72	83	28	0	3	85	10	92	4e-36	120	15.9	0.7	82	95	66	MOLECULE: HUMAN ETV1;	NP_001156620.1	NP_001156620	66.27	80.72	83	28	0	3	85	315	397	5e-32	124	IPR006715; IPR011991; IPR000418	Y	ETV1	9606 [Organism: human] [Scientific Name: Homo sapiens]	Y	11	4CO8-A	-	-	-	-	-	-	-	-	-
4BNC	A	P50549	gi|520728590|pdb|4BNC|A	66.27	80.72	83	28	0	3	85	10	92	4e-36	120	15.9	0.7	82	95	66	MOLECULE: HUMAN ETV1;	NP_001156620.1	NP_001156620	66.27	80.72	83	28	0	3	85	315	397	5e-32	124	IPR006715; IPR011991; IPR000418	Y	ETV1	9606 [Organism: human] [Scientific Name: Homo sapiens]	Y	11	4CO8-A	-	-	-	-	-	-	-	-	-
4BNC	A	P50549	gi|520728590|pdb|4BNC|A	66.27	80.72	83	28	0	3	85	10	92	4e-36	120	15.9	0.7	82	95	66	MOLECULE: HUMAN ETV1;	NP_001156620.1	NP_001156620	66.27	80.72	83	28	0	3	85	315	397	5e-32	124	IPR006715; IPR011991; IPR000418	Y	ETV1	9606 [Organism: human] [Scientific Name: Homo sapiens]	Y	11	4CO8-A	-	-	-	-	-	-	-	-	-
4BNC	A	P50549	gi|520728590|pdb|4BNC|A	66.27	80.72	83	28	0	3	85	10	92	4e-36	120	15.9	0.7	82	95	66	MOLECULE: HUMAN ETV1;	NP_001156620.1	NP_001156620	66.27	80.72	83	28	0	3	85	315	397	5e-32	124	IPR006715; IPR011991; IPR000418	Y	ETV1	9606 [Organism: human] [Scientific Name: Homo sapiens]	Y	11	4CO8-A	-	-	-	-	-	-	-	-	-
4BNC	A	P50549	gi|520728590|pdb|4BNC|A	66.27	80.72	83	28	0	3	85	10	92	4e-36	120	15.9	0.7	82	95	66	MOLECULE: HUMAN ETV1;	NP_001156620.1	NP_001156620	66.27	80.72	83	28	0	3	85	315	397	5e-32	124	IPR006715; IPR011991; IPR000418	Y	ETV1	9606 [Organism: human] [Scientific Name: Homo sapiens]	Y	11	4CO8-A	-	-	-	-	-	-	-	-	-
4BNC	A	P50549	gi|520728590|pdb|4BNC|A	66.27	80.72	83	28	0	3	85	10	92	4e-36	120	15.9	0.7	82	95	66	MOLECULE: HUMAN ETV1;	NP_001156620.1	NP_001156620	66.27	80.72	83	28	0	3	85	315	397	5e-32	124	IPR006715; IPR011991; IPR000418	Y	ETV1	9606 [Organism: human] [Scientific Name: Homo sapiens]	Y	11	4CO8-A	-	-	-	-	-	-	-	-	-
4BNC	A	P50549	gi|520728590|pdb|4BNC|A	66.27	80.72	83	28	0	3	85	10	92	4e-36	120	15.9	0.7	82	95	66	MOLECULE: HUMAN ETV1;	NP_001156620.1	NP_001156620	66.27	80.72	83	28	0	3	85	315	397	5e-32	124	IPR006715; IPR011991; IPR000418	Y	ETV1	9606 [Organism: human] [Scientific Name: Homo sapiens]	Y	11	4CO8-A	-	-	-	-	-	-	-	-	-
4BNC	A	P50549	gi|520728590|pdb|4BNC|A	66.27	80.72	83	28	0	3	85	10	92	4e-36	120	15.9	0.7	82	95	66	MOLECULE: HUMAN ETV1;	NP_001156620.1	NP_001156620	66.27	80.72	83	28	0	3	85	315	397	5e-32	124	IPR006715; IPR011991; IPR000418	Y	ETV1	9606 [Organism: human] [Scientific Name: Homo sapiens]	Y	11	4CO8-A	-	-	-	-	-	-	-	-	-
4BNC	A	P50549	gi|520728590|pdb|4BNC|A	66.27	80.72	83	28	0	3	85	10	92	4e-36	120	15.9	0.7	82	95	66	MOLECULE: HUMAN ETV1;	NP_001156620.1	NP_001156620	66.27	80.72	83	28	0	3	85	315	397	5e-32	124	IPR006715; IPR011991; IPR000418	Y	ETV1	9606 [Organism: human] [Scientific Name: Homo sapiens]	Y	11	4CO8-A	-	-	-	-	-	-	-	-	-
4BNC	A	P50549	gi|520728590|pdb|4BNC|A	66.27	80.72	83	28	0	3	85	10	92	4e-36	120	15.9	0.7	82	95	66	MOLECULE: HUMAN ETV1;	NP_001156620.1	NP_001156620	66.27	80.72	83	28	0	3	85	315	397	5e-32	124	IPR006715; IPR011991; IPR000418	Y	ETV1	9606 [Organism: human] [Scientific Name: Homo sapiens]	Y	11	4CO8-A	-	-	-	-	-	-	-	-	-
4BNC	A	P50549	gi|520728590|pdb|4BNC|A	66.27	80.72	83	28	0	3	85	10	92	4e-36	120	15.9	0.7	82	95	66	MOLECULE: HUMAN ETV1;	NP_001156620.1	NP_001156620	66.27	80.72	83	28	0	3	85	315	397	5e-32	124	IPR006715; IPR011991; IPR000418	Y	ETV1	9606 [Organism: human] [Scientific Name: Homo sapiens]	Y	11	4CO8-A	-	-	-	-	-	-	-	-	-
4BNC	A	P50549	gi|520728590|pdb|4BNC|A	66.27	80.72	83	28	0	3	85	10	92	4e-36	120	15.9	0.7	82	95	66	MOLECULE: HUMAN ETV1;	NP_001156620.1	NP_001156620	66.27	80.72	83	28	0	3	85	315	397	5e-32	124	IPR006715; IPR011991; IPR000418	Y	ETV1	9606 [Organism: human] [Scientific Name: Homo sapiens]	Y	11	4CO8-A	-	-	-	-	-	-	-	-	-
4BNC	A	P50549	gi|520728590|pdb|4BNC|A	66.27	80.72	83	28	0	3	85	10	92	4e-36	120	15.9	0.7	82	95	66	MOLECULE: HUMAN ETV1;	NP_001156621.1	NP_001156621	66.27	80.72	83	28	0	3	85	315	397	5e-32	124	IPR006715; IPR011991; IPR000418	Y	ETV1	9606 [Organism: human] [Scientific Name: Homo sapiens]	Y	11	4CO8-A	-	-	-	-	-	-	-	-	-
4BNC	A	P50549	gi|520728590|pdb|4BNC|A	66.27	80.72	83	28	0	3	85	10	92	4e-36	120	15.9	0.7	82	95	66	MOLECULE: HUMAN ETV1;	NP_001156622.1	NP_001156622	66.27	80.72	83	28	0	3	85	293	375	1e-32	125	IPR006715; IPR011991; IPR000418	Y	ETV1	9606 [Organism: human] [Scientific Name: Homo sapiens]	Y	11	4CO8-A	-	-	-	-	-	-	-	-	-
4BNC	A	P50549	gi|520728590|pdb|4BNC|A	66.27	80.72	83	28	0	3	85	10	92	4e-36	120	15.9	0.7	82	95	66	MOLECULE: HUMAN ETV1;	NP_001156622.1	NP_001156622	66.27	80.72	83	28	0	3	85	293	375	1e-32	125	IPR006715; IPR011991; IPR000418	Y	ETV1	9606 [Organism: human] [Scientific Name: Homo sapiens]	Y	11	4CO8-A	-	-	-	-	-	-	-	-	-
4BNC	A	P50549	gi|520728590|pdb|4BNC|A	66.27	80.72	83	28	0	3	85	10	92	4e-36	120	15.9	0.7	82	95	66	MOLECULE: HUMAN ETV1;	NP_001156622.1	NP_001156622	66.27	80.72	83	28	0	3	85	293	375	1e-32	125	IPR006715; IPR011991; IPR000418	Y	ETV1	9606 [Organism: human] [Scientific Name: Homo sapiens]	Y	11	4CO8-A	-	-	-	-	-	-	-	-	-
4BNC	A	P50549	gi|520728590|pdb|4BNC|A	66.27	80.72	83	28	0	3	85	10	92	4e-36	120	15.9	0.7	82	95	66	MOLECULE: HUMAN ETV1;	NP_001156622.1	NP_001156622	66.27	80.72	83	28	0	3	85	293	375	1e-32	125	IPR006715; IPR011991; IPR000418	Y	ETV1	9606 [Organism: human] [Scientific Name: Homo sapiens]	Y	11	4CO8-A	-	-	-	-	-	-	-	-	-
4BNC	A	P50549	gi|520728590|pdb|4BNC|A	66.27	80.72	83	28	0	3	85	10	92	4e-36	120	15.9	0.7	82	95	66	MOLECULE: HUMAN ETV1;	NP_001156622.1	NP_001156622	66.27	80.72	83	28	0	3	85	293	375	1e-32	125	IPR006715; IPR011991; IPR000418	Y	ETV1	9606 [Organism: human] [Scientific Name: Homo sapiens]	Y	11	4CO8-A	-	-	-	-	-	-	-	-	-
4BNC	A	P50549	gi|520728590|pdb|4BNC|A	66.27	80.72	83	28	0	3	85	10	92	4e-36	120	15.9	0.7	82	95	66	MOLECULE: HUMAN ETV1;	NP_001156622.1	NP_001156622	66.27	80.72	83	28	0	3	85	293	375	1e-32	125	IPR006715; IPR011991; IPR000418	Y	ETV1	9606 [Organism: human] [Scientific Name: Homo sapiens]	Y	11	4CO8-A	-	-	-	-	-	-	-	-	-
4BNC	A	P50549	gi|520728590|pdb|4BNC|A	66.27	80.72	83	28	0	3	85	10	92	4e-36	120	15.9	0.7	82	95	66	MOLECULE: HUMAN ETV1;	NP_001156622.1	NP_001156622	66.27	80.72	83	28	0	3	85	293	375	1e-32	125	IPR006715; IPR011991; IPR000418	Y	ETV1	9606 [Organism: human] [Scientific Name: Homo sapiens]	Y	11	4CO8-A	-	-	-	-	-	-	-	-	-
4BNC	A	P50549	gi|520728590|pdb|4BNC|A	66.27	80.72	83	28	0	3	85	10	92	4e-36	120	15.9	0.7	82	95	66	MOLECULE: HUMAN ETV1;	NP_001156622.1	NP_001156622	66.27	80.72	83	28	0	3	85	293	375	1e-32	125	IPR006715; IPR011991; IPR000418	Y	ETV1	9606 [Organism: human] [Scientific Name: Homo sapiens]	Y	11	4CO8-A	-	-	-	-	-	-	-	-	-
4BNC	A	P50549	gi|520728590|pdb|4BNC|A	66.27	80.72	83	28	0	3	85	10	92	4e-36	120	15.9	0.7	82	95	66	MOLECULE: HUMAN ETV1;	NP_001156622.1	NP_001156622	66.27	80.72	83	28	0	3	85	293	375	1e-32	125	IPR006715; IPR011991; IPR000418	Y	ETV1	9606 [Organism: human] [Scientific Name: Homo sapiens]	Y	11	4CO8-A	-	-	-	-	-	-	-	-	-
4BNC	A	P50549	gi|520728590|pdb|4BNC|A	66.27	80.72	83	28	0	3	85	10	92	4e-36	120	15.9	0.7	82	95	66	MOLECULE: HUMAN ETV1;	NP_001156622.1	NP_001156622	66.27	80.72	83	28	0	3	85	293	375	1e-32	125	IPR006715; IPR011991; IPR000418	Y	ETV1	9606 [Organism: human] [Scientific Name: Homo sapiens]	Y	11	4CO8-A	-	-	-	-	-	-	-	-	-
4BNC	A	P50549	gi|520728590|pdb|4BNC|A	66.27	80.72	83	28	0	3	85	10	92	4e-36	120	15.9	0.7	82	95	66	MOLECULE: HUMAN ETV1;	NP_001156622.1	NP_001156622	66.27	80.72	83	28	0	3	85	293	375	1e-32	125	IPR006715; IPR011991; IPR000418	Y	ETV1	9606 [Organism: human] [Scientific Name: Homo sapiens]	Y	11	4CO8-A	-	-	-	-	-	-	-	-	-
4BNC	A	P50549	gi|520728590|pdb|4BNC|A	66.27	80.72	83	28	0	3	85	10	92	4e-36	120	15.9	0.7	82	95	66	MOLECULE: HUMAN ETV1;	NP_001156622.1	NP_001156622	66.27	80.72	83	28	0	3	85	293	375	1e-32	125	IPR006715; IPR011991; IPR000418	Y	ETV1	9606 [Organism: human] [Scientific Name: Homo sapiens]	Y	11	4CO8-A	-	-	-	-	-	-	-	-	-
4BNC	A	P50549	gi|520728590|pdb|4BNC|A	66.27	80.72	83	28	0	3	85	10	92	4e-36	120	15.9	0.7	82	95	66	MOLECULE: HUMAN ETV1;	NP_001156622.1	NP_001156622	66.27	80.72	83	28	0	3	85	293	375	1e-32	125	IPR006715; IPR011991; IPR000418	Y	ETV1	9606 [Organism: human] [Scientific Name: Homo sapiens]	Y	11	4CO8-A	-	-	-	-	-	-	-	-	-
4BNC	A	P50549	gi|520728590|pdb|4BNC|A	66.27	80.72	83	28	0	3	85	10	92	4e-36	120	15.9	0.7	82	95	66	MOLECULE: HUMAN ETV1;	NP_001156622.1	NP_001156622	66.27	80.72	83	28	0	3	85	293	375	1e-32	125	IPR006715; IPR011991; IPR000418	Y	ETV1	9606 [Organism: human] [Scientific Name: Homo sapiens]	Y	11	4CO8-A	-	-	-	-	-	-	-	-	-
4BNC	A	P50549	gi|520728590|pdb|4BNC|A	66.27	80.72	83	28	0	3	85	10	92	4e-36	120	15.9	0.7	82	95	66	MOLECULE: HUMAN ETV1;	NP_001156622.1	NP_001156622	66.27	80.72	83	28	0	3	85	293	375	1e-32	125	IPR006715; IPR011991; IPR000418	Y	ETV1	9606 [Organism: human] [Scientific Name: Homo sapiens]	Y	11	4CO8-A	-	-	-	-	-	-	-	-	-
4BNC	A	P50549	gi|520728590|pdb|4BNC|A	66.27	80.72	83	28	0	3	85	10	92	4e-36	120	15.9	0.7	82	95	66	MOLECULE: HUMAN ETV1;	NP_001156622.1	NP_001156622	66.27	80.72	83	28	0	3	85	293	375	1e-32	125	IPR006715; IPR011991; IPR000418	Y	ETV1	9606 [Organism: human] [Scientific Name: Homo sapiens]	Y	11	4CO8-A	-	-	-	-	-	-	-	-	-
4BNC	A	P50549	gi|520728590|pdb|4BNC|A	66.27	80.72	83	28	0	3	85	10	92	4e-36	120	15.9	0.7	82	95	66	MOLECULE: HUMAN ETV1;	NP_001156622.1	NP_001156622	66.27	80.72	83	28	0	3	85	293	375	1e-32	125	IPR006715; IPR011991; IPR000418	Y	ETV1	9606 [Organism: human] [Scientific Name: Homo sapiens]	Y	11	4CO8-A	-	-	-	-	-	-	-	-	-
4BNC	A	P50549	gi|520728590|pdb|4BNC|A	66.27	80.72	83	28	0	3	85	10	92	4e-36	120	15.9	0.7	82	95	66	MOLECULE: HUMAN ETV1;	NP_001156622.1	NP_001156622	66.27	80.72	83	28	0	3	85	293	375	1e-32	125	IPR006715; IPR011991; IPR000418	Y	ETV1	9606 [Organism: human] [Scientific Name: Homo sapiens]	Y	11	4CO8-A	-	-	-	-	-	-	-	-	-
4BNC	A	P50549	gi|520728590|pdb|4BNC|A	66.27	80.72	83	28	0	3	85	10	92	4e-36	120	15.9	0.7	82	95	66	MOLECULE: HUMAN ETV1;	NP_001156622.1	NP_001156622	66.27	80.72	83	28	0	3	85	293	375	1e-32	125	IPR006715; IPR011991; IPR000418	Y	ETV1	9606 [Organism: human] [Scientific Name: Homo sapiens]	Y	11	4CO8-A	-	-	-	-	-	-	-	-	-
4BNC	A	P50549	gi|520728590|pdb|4BNC|A	66.27	80.72	83	28	0	3	85	10	92	4e-36	120	15.9	0.7	82	95	66	MOLECULE: HUMAN ETV1;	NP_001156622.1	NP_001156622	66.27	80.72	83	28	0	3	85	293	375	1e-32	125	IPR006715; IPR011991; IPR000418	Y	ETV1	9606 [Organism: human] [Scientific Name: Homo sapiens]	Y	11	4CO8-A	-	-	-	-	-	-	-	-	-
4BNC	A	P50549	gi|520728590|pdb|4BNC|A	66.27	80.72	83	28	0	3	85	10	92	4e-36	120	15.9	0.7	82	95	66	MOLECULE: HUMAN ETV1;	NP_001156622.1	NP_001156622	66.27	80.72	83	28	0	3	85	293	375	1e-32	125	IPR006715; IPR011991; IPR000418	Y	ETV1	9606 [Organism: human] [Scientific Name: Homo sapiens]	Y	11	4CO8-A	-	-	-	-	-	-	-	-	-
4BNC	A	P50549	gi|520728590|pdb|4BNC|A	66.27	80.72	83	28	0	3	85	10	92	4e-36	120	15.9	0.7	82	95	66	MOLECULE: HUMAN ETV1;	NP_001156622.1	NP_001156622	66.27	80.72	83	28	0	3	85	293	375	1e-32	125	IPR006715; IPR011991; IPR000418	Y	ETV1	9606 [Organism: human] [Scientific Name: Homo sapiens]	Y	11	4CO8-A	-	-	-	-	-	-	-	-	-
4BNC	A	P50549	gi|520728590|pdb|4BNC|A	66.27	80.72	83	28	0	3	85	10	92	4e-36	120	15.9	0.7	82	95	66	MOLECULE: HUMAN ETV1;	NP_001156622.1	NP_001156622	66.27	80.72	83	28	0	3	85	293	375	1e-32	125	IPR006715; IPR011991; IPR000418	Y	ETV1	9606 [Organism: human] [Scientific Name: Homo sapiens]	Y	11	4CO8-A	-	-	-	-	-	-	-	-	-
4BNC	A	P50549	gi|520728590|pdb|4BNC|A	66.27	80.72	83	28	0	3	85	10	92	4e-36	120	15.9	0.7	82	95	66	MOLECULE: HUMAN ETV1;	NP_001156622.1	NP_001156622	66.27	80.72	83	28	0	3	85	293	375	1e-32	125	IPR006715; IPR011991; IPR000418	Y	ETV1	9606 [Organism: human] [Scientific Name: Homo sapiens]	Y	11	4CO8-A	-	-	-	-	-	-	-	-	-
4BNC	A	P50549	gi|520728590|pdb|4BNC|A	66.27	80.72	83	28	0	3	85	10	92	4e-36	120	15.9	0.7	82	95	66	MOLECULE: HUMAN ETV1;	NP_001156622.1	NP_001156622	66.27	80.72	83	28	0	3	85	293	375	1e-32	125	IPR006715; IPR011991; IPR000418	Y	ETV1	9606 [Organism: human] [Scientific Name: Homo sapiens]	Y	11	4CO8-A	-	-	-	-	-	-	-	-	-
4BNC	A	P50549	gi|520728590|pdb|4BNC|A	66.27	80.72	83	28	0	3	85	10	92	4e-36	120	15.9	0.7	82	95	66	MOLECULE: HUMAN ETV1;	NP_001156622.1	NP_001156622	66.27	80.72	83	28	0	3	85	293	375	1e-32	125	IPR006715; IPR011991; IPR000418	Y	ETV1	9606 [Organism: human] [Scientific Name: Homo sapiens]	Y	11	4CO8-A	-	-	-	-	-	-	-	-	-
4BNC	A	P50549	gi|520728590|pdb|4BNC|A	66.27	80.72	83	28	0	3	85	10	92	4e-36	120	15.9	0.7	82	95	66	MOLECULE: HUMAN ETV1;	NP_001156622.1	NP_001156622	66.27	80.72	83	28	0	3	85	293	375	1e-32	125	IPR006715; IPR011991; IPR000418	Y	ETV1	9606 [Organism: human] [Scientific Name: Homo sapiens]	Y	11	4CO8-A	-	-	-	-	-	-	-	-	-
4BNC	A	P50549	gi|520728590|pdb|4BNC|A	66.27	80.72	83	28	0	3	85	10	92	4e-36	120	15.9	0.7	82	95	66	MOLECULE: HUMAN ETV1;	NP_001156622.1	NP_001156622	66.27	80.72	83	28	0	3	85	293	375	1e-32	125	IPR006715; IPR011991; IPR000418	Y	ETV1	9606 [Organism: human] [Scientific Name: Homo sapiens]	Y	11	4CO8-A	-	-	-	-	-	-	-	-	-
4BNC	A	P50549	gi|520728590|pdb|4BNC|A	66.27	80.72	83	28	0	3	85	10	92	4e-36	120	15.9	0.7	82	95	66	MOLECULE: HUMAN ETV1;	NP_001156622.1	NP_001156622	66.27	80.72	83	28	0	3	85	293	375	1e-32	125	IPR006715; IPR011991; IPR000418	Y	ETV1	9606 [Organism: human] [Scientific Name: Homo sapiens]	Y	11	4CO8-A	-	-	-	-	-	-	-	-	-
4BNC	A	P50549	gi|520728590|pdb|4BNC|A	66.27	80.72	83	28	0	3	85	10	92	4e-36	120	15.9	0.7	82	95	66	MOLECULE: HUMAN ETV1;	NP_001156622.1	NP_001156622	66.27	80.72	83	28	0	3	85	293	375	1e-32	125	IPR006715; IPR011991; IPR000418	Y	ETV1	9606 [Organism: human] [Scientific Name: Homo sapiens]	Y	11	4CO8-A	-	-	-	-	-	-	-	-	-
4BNC	A	P50549	gi|520728590|pdb|4BNC|A	66.27	80.72	83	28	0	3	85	10	92	4e-36	120	15.9	0.7	82	95	66	MOLECULE: HUMAN ETV1;	NP_001156622.1	NP_001156622	66.27	80.72	83	28	0	3	85	293	375	1e-32	125	IPR006715; IPR011991; IPR000418	Y	ETV1	9606 [Organism: human] [Scientific Name: Homo sapiens]	Y	11	4CO8-A	-	-	-	-	-	-	-	-	-
4BNC	A	P50549	gi|520728590|pdb|4BNC|A	66.27	80.72	83	28	0	3	85	10	92	4e-36	120	15.9	0.7	82	95	66	MOLECULE: HUMAN ETV1;	NP_001156622.1	NP_001156622	66.27	80.72	83	28	0	3	85	293	375	1e-32	125	IPR006715; IPR011991; IPR000418	Y	ETV1	9606 [Organism: human] [Scientific Name: Homo sapiens]	Y	11	4CO8-A	-	-	-	-	-	-	-	-	-
4BNC	A	P50549	gi|520728590|pdb|4BNC|A	66.27	80.72	83	28	0	3	85	10	92	4e-36	120	15.9	0.7	82	95	66	MOLECULE: HUMAN ETV1;	NP_001156622.1	NP_001156622	66.27	80.72	83	28	0	3	85	293	375	1e-32	125	IPR006715; IPR011991; IPR000418	Y	ETV1	9606 [Organism: human] [Scientific Name: Homo sapiens]	Y	11	4CO8-A	-	-	-	-	-	-	-	-	-
4BNC	A	P50549	gi|520728590|pdb|4BNC|A	66.27	80.72	83	28	0	3	85	10	92	4e-36	120	15.9	0.7	82	95	66	MOLECULE: HUMAN ETV1;	NP_001156622.1	NP_001156622	66.27	80.72	83	28	0	3	85	293	375	1e-32	125	IPR006715; IPR011991; IPR000418	Y	ETV1	9606 [Organism: human] [Scientific Name: Homo sapiens]	Y	11	4CO8-A	-	-	-	-	-	-	-	-	-
4BNC	A	P50549	gi|520728590|pdb|4BNC|A	66.27	80.72	83	28	0	3	85	10	92	4e-36	120	15.9	0.7	82	95	66	MOLECULE: HUMAN ETV1;	NP_001156622.1	NP_001156622	66.27	80.72	83	28	0	3	85	293	375	1e-32	125	IPR006715; IPR011991; IPR000418	Y	ETV1	9606 [Organism: human] [Scientific Name: Homo sapiens]	Y	11	4CO8-A	-	-	-	-	-	-	-	-	-
4BNC	A	P50549	gi|520728590|pdb|4BNC|A	66.27	80.72	83	28	0	3	85	10	92	4e-36	120	15.9	0.7	82	95	66	MOLECULE: HUMAN ETV1;	NP_001156622.1	NP_001156622	66.27	80.72	83	28	0	3	85	293	375	1e-32	125	IPR006715; IPR011991; IPR000418	Y	ETV1	9606 [Organism: human] [Scientific Name: Homo sapiens]	Y	11	4CO8-A	-	-	-	-	-	-	-	-	-
4BNC	A	P50549	gi|520728590|pdb|4BNC|A	66.27	80.72	83	28	0	3	85	10	92	4e-36	120	15.9	0.7	82	95	66	MOLECULE: HUMAN ETV1;	NP_001156622.1	NP_001156622	66.27	80.72	83	28	0	3	85	293	375	1e-32	125	IPR006715; IPR011991; IPR000418	Y	ETV1	9606 [Organism: human] [Scientific Name: Homo sapiens]	Y	11	4CO8-A	-	-	-	-	-	-	-	-	-
4BNC	A	P50549	gi|520728590|pdb|4BNC|A	66.27	80.72	83	28	0	3	85	10	92	4e-36	120	15.9	0.7	82	95	66	MOLECULE: HUMAN ETV1;	NP_001156622.1	NP_001156622	66.27	80.72	83	28	0	3	85	293	375	1e-32	125	IPR006715; IPR011991; IPR000418	Y	ETV1	9606 [Organism: human] [Scientific Name: Homo sapiens]	Y	11	4CO8-A	-	-	-	-	-	-	-	-	-
4BNC	A	P50549	gi|520728590|pdb|4BNC|A	66.27	80.72	83	28	0	3	85	10	92	4e-36	120	15.9	0.7	82	95	66	MOLECULE: HUMAN ETV1;	NP_001156622.1	NP_001156622	66.27	80.72	83	28	0	3	85	293	375	1e-32	125	IPR006715; IPR011991; IPR000418	Y	ETV1	9606 [Organism: human] [Scientific Name: Homo sapiens]	Y	11	4CO8-A	-	-	-	-	-	-	-	-	-
4BNC	A	P50549	gi|520728590|pdb|4BNC|A	66.27	80.72	83	28	0	3	85	10	92	4e-36	120	15.9	0.7	82	95	66	MOLECULE: HUMAN ETV1;	NP_001156622.1	NP_001156622	66.27	80.72	83	28	0	3	85	293	375	1e-32	125	IPR006715; IPR011991; IPR000418	Y	ETV1	9606 [Organism: human] [Scientific Name: Homo sapiens]	Y	11	4CO8-A	-	-	-	-	-	-	-	-	-
4BNC	A	P50549	gi|520728590|pdb|4BNC|A	66.27	80.72	83	28	0	3	85	10	92	4e-36	120	15.9	0.7	82	95	66	MOLECULE: HUMAN ETV1;	NP_001156622.1	NP_001156622	66.27	80.72	83	28	0	3	85	293	375	1e-32	125	IPR006715; IPR011991; IPR000418	Y	ETV1	9606 [Organism: human] [Scientific Name: Homo sapiens]	Y	11	4CO8-A	-	-	-	-	-	-	-	-	-
4BNC	A	P50549	gi|520728590|pdb|4BNC|A	66.27	80.72	83	28	0	3	85	10	92	4e-36	120	15.9	0.7	82	95	66	MOLECULE: HUMAN ETV1;	NP_001156622.1	NP_001156622	66.27	80.72	83	28	0	3	85	293	375	1e-32	125	IPR006715; IPR011991; IPR000418	Y	ETV1	9606 [Organism: human] [Scientific Name: Homo sapiens]	Y	11	4CO8-A	-	-	-	-	-	-	-	-	-
4BNC	A	P50549	gi|520728590|pdb|4BNC|A	66.27	80.72	83	28	0	3	85	10	92	4e-36	120	15.9	0.7	82	95	66	MOLECULE: HUMAN ETV1;	NP_001156622.1	NP_001156622	66.27	80.72	83	28	0	3	85	293	375	1e-32	125	IPR006715; IPR011991; IPR000418	Y	ETV1	9606 [Organism: human] [Scientific Name: Homo sapiens]	Y	11	4CO8-A	-	-	-	-	-	-	-	-	-
4BNC	A	P50549	gi|520728590|pdb|4BNC|A	66.27	80.72	83	28	0	3	85	10	92	4e-36	120	15.9	0.7	82	95	66	MOLECULE: HUMAN ETV1;	NP_001156622.1	NP_001156622	66.27	80.72	83	28	0	3	85	293	375	1e-32	125	IPR006715; IPR011991; IPR000418	Y	ETV1	9606 [Organism: human] [Scientific Name: Homo sapiens]	Y	11	4CO8-A	-	-	-	-	-	-	-	-	-
4BNC	A	P50549	gi|520728590|pdb|4BNC|A	66.27	80.72	83	28	0	3	85	10	92	4e-36	120	15.9	0.7	82	95	66	MOLECULE: HUMAN ETV1;	NP_001156622.1	NP_001156622	66.27	80.72	83	28	0	3	85	293	375	1e-32	125	IPR006715; IPR011991; IPR000418	Y	ETV1	9606 [Organism: human] [Scientific Name: Homo sapiens]	Y	11	4CO8-A	-	-	-	-	-	-	-	-	-
4BNC	A	P50549	gi|520728590|pdb|4BNC|A	66.27	80.72	83	28	0	3	85	10	92	4e-36	120	15.9	0.7	82	95	66	MOLECULE: HUMAN ETV1;	NP_001156622.1	NP_001156622	66.27	80.72	83	28	0	3	85	293	375	1e-32	125	IPR006715; IPR011991; IPR000418	Y	ETV1	9606 [Organism: human] [Scientific Name: Homo sapiens]	Y	11	4CO8-A	-	-	-	-	-	-	-	-	-
4BNC	A	P50549	gi|520728590|pdb|4BNC|A	66.27	80.72	83	28	0	3	85	10	92	4e-36	120	15.9	0.7	82	95	66	MOLECULE: HUMAN ETV1;	NP_001156622.1	NP_001156622	66.27	80.72	83	28	0	3	85	293	375	1e-32	125	IPR006715; IPR011991; IPR000418	Y	ETV1	9606 [Organism: human] [Scientific Name: Homo sapiens]	Y	11	4CO8-A	-	-	-	-	-	-	-	-	-
4BNC	A	P50549	gi|520728590|pdb|4BNC|A	66.27	80.72	83	28	0	3	85	10	92	4e-36	120	15.9	0.7	82	95	66	MOLECULE: HUMAN ETV1;	NP_001156622.1	NP_001156622	66.27	80.72	83	28	0	3	85	293	375	1e-32	125	IPR006715; IPR011991; IPR000418	Y	ETV1	9606 [Organism: human] [Scientific Name: Homo sapiens]	Y	11	4CO8-A	-	-	-	-	-	-	-	-	-
4BNC	A	P50549	gi|520728590|pdb|4BNC|A	66.27	80.72	83	28	0	3	85	10	92	4e-36	120	15.9	0.7	82	95	66	MOLECULE: HUMAN ETV1;	NP_001156622.1	NP_001156622	66.27	80.72	83	28	0	3	85	293	375	1e-32	125	IPR006715; IPR011991; IPR000418	Y	ETV1	9606 [Organism: human] [Scientific Name: Homo sapiens]	Y	11	4CO8-A	-	-	-	-	-	-	-	-	-
4BNC	A	P50549	gi|520728590|pdb|4BNC|A	66.27	80.72	83	28	0	3	85	10	92	4e-36	120	15.9	0.7	82	95	66	MOLECULE: HUMAN ETV1;	NP_001156623.1	NP_001156623	66.27	80.72	83	28	0	3	85	275	357	2e-32	125	IPR006715; IPR011991; IPR000418	Y	ETV1	9606 [Organism: human] [Scientific Name: Homo sapiens]	Y	11	4CO8-A	-	-	-	-	-	-	-	-	-
4BNC	A	P50549	gi|520728590|pdb|4BNC|A	66.27	80.72	83	28	0	3	85	10	92	4e-36	120	15.9	0.7	82	95	66	MOLECULE: HUMAN ETV1;	NP_001156623.1	NP_001156623	66.27	80.72	83	28	0	3	85	275	357	2e-32	125	IPR006715; IPR011991; IPR000418	Y	ETV1	9606 [Organism: human] [Scientific Name: Homo sapiens]	Y	11	4CO8-A	-	-	-	-	-	-	-	-	-
4BNC	A	P50549	gi|520728590|pdb|4BNC|A	66.27	80.72	83	28	0	3	85	10	92	4e-36	120	15.9	0.7	82	95	66	MOLECULE: HUMAN ETV1;	NP_001156623.1	NP_001156623	66.27	80.72	83	28	0	3	85	275	357	2e-32	125	IPR006715; IPR011991; IPR000418	Y	ETV1	9606 [Organism: human] [Scientific Name: Homo sapiens]	Y	11	4CO8-A	-	-	-	-	-	-	-	-	-
[truncated: 8,538 more rows]
[truncated: 50 more columns]
