# Supplementary material for: Identification of Novel Interaction Partners of Ets-1: Focus on DNA Repair
Source: Genes (Basel). 2019 Mar 8;10(3):206. doi: 10.3390/genes10030206 (PMC6470857; doi:10.3390/genes10030206)
Supplement: Supplementary file 1 [file genes-10-00206-s001.zip › Supplementary_Table_S3_PARP1_BRCT_homologs.xlsx]

## Sheet: results_PARP1_BRCT__all_BLASTs_
PDB	chain	uniprot	subject ids	% identity	% positives	alignment length	mismatches	gap opens	q. start	q. end	s. start	s. end	evalue	bit score	Z	rmsd	lali	nres	%id	PDB Description	refseq+version	refseq	% identity	% positives	alignment length	mismatches	gap opens	q. start	q. end	s. start	s. end	evalue	bit score	interpro	contains_IPR001357	gene_symbol	taxon_ID	filter	group_ID	structure	Rank_CATH	K-Score_CATH	G-Score_CATH	J-Score_CATH	H-Score_CATH	T-Score_CATH	RMSD_CATH	N/*_CATH	P/$_CATH
3AL3	A	Q92547	-	-	-	-	-	-	-	-	-	-	-	-	8.4	2.7	90	218	14	MOLECULE: DNA TOPOISOMERASE 2-BINDING PROTEIN 1;	-	-	-	-	-	-	-	-	-	-	-	-	-	IPR026993;IPR016126;IPR001357	Y	TOPBP1	9606 [Organism: human] [Scientific Name: Homo sapiens]	Y	23	1WF6-A01	-	-	-	-	-	-	-	-	-
3AL3	A	Q92547	-	-	-	-	-	-	-	-	-	-	-	-	8.4	2.7	90	218	14	MOLECULE: DNA TOPOISOMERASE 2-BINDING PROTEIN 1;	-	-	-	-	-	-	-	-	-	-	-	-	-	IPR026993;IPR016126;IPR001357	Y	TOPBP1	9606 [Organism: human] [Scientific Name: Homo sapiens]	Y	20	3PD7-A00	-	-	-	-	-	-	-	-	-
3AL3	A	Q92547	-	-	-	-	-	-	-	-	-	-	-	-	8.4	2.7	90	218	14	MOLECULE: DNA TOPOISOMERASE 2-BINDING PROTEIN 1;	-	-	-	-	-	-	-	-	-	-	-	-	-	IPR026993;IPR016126;IPR001357	Y	TOPBP1	9606 [Organism: human] [Scientific Name: Homo sapiens]	Y	11	-	-	-	-	-	-	-	-	-	-
3AL3	A	Q92547	-	-	-	-	-	-	-	-	-	-	-	-	8.4	2.7	90	218	14	MOLECULE: DNA TOPOISOMERASE 2-BINDING PROTEIN 1;	-	-	-	-	-	-	-	-	-	-	-	-	-	IPR026993;IPR016126;IPR001357	Y	TOPBP1	9606 [Organism: human] [Scientific Name: Homo sapiens]	Y	26	-	-	-	-	-	-	-	-	-	-
3AL3	A	Q92547	-	-	-	-	-	-	-	-	-	-	-	-	8.4	2.7	90	218	14	MOLECULE: DNA TOPOISOMERASE 2-BINDING PROTEIN 1;	-	-	-	-	-	-	-	-	-	-	-	-	-	IPR026993;IPR016126;IPR001357	Y	TOPBP1	9606 [Organism: human] [Scientific Name: Homo sapiens]	Y	20	3PD7-A00	-	-	-	-	-	-	-	-	-
3AL3	A	Q92547	-	-	-	-	-	-	-	-	-	-	-	-	8.4	2.7	90	218	14	MOLECULE: DNA TOPOISOMERASE 2-BINDING PROTEIN 1;	-	-	-	-	-	-	-	-	-	-	-	-	-	IPR026993;IPR016126;IPR001357	Y	TOPBP1	9606 [Organism: human] [Scientific Name: Homo sapiens]	Y	20	3PD7-A00	-	-	-	-	-	-	-	-	-
3AL2	A	Q92547	-	-	-	-	-	-	-	-	-	-	-	-	8.3	2.7	89	220	16	MOLECULE: DNA TOPOISOMERASE 2-BINDING PROTEIN 1;	-	-	-	-	-	-	-	-	-	-	-	-	-	IPR026993;IPR016126;IPR001357	Y	TOPBP1	9606 [Organism: human] [Scientific Name: Homo sapiens]	Y	23	1WF6-A01	-	-	-	-	-	-	-	-	-
3AL2	A	Q92547	-	-	-	-	-	-	-	-	-	-	-	-	8.3	2.7	89	220	16	MOLECULE: DNA TOPOISOMERASE 2-BINDING PROTEIN 1;	-	-	-	-	-	-	-	-	-	-	-	-	-	IPR026993;IPR016126;IPR001357	Y	TOPBP1	9606 [Organism: human] [Scientific Name: Homo sapiens]	Y	20	3PD7-A00	-	-	-	-	-	-	-	-	-
3AL2	A	Q92547	-	-	-	-	-	-	-	-	-	-	-	-	8.3	2.7	89	220	16	MOLECULE: DNA TOPOISOMERASE 2-BINDING PROTEIN 1;	-	-	-	-	-	-	-	-	-	-	-	-	-	IPR026993;IPR016126;IPR001357	Y	TOPBP1	9606 [Organism: human] [Scientific Name: Homo sapiens]	Y	11	-	-	-	-	-	-	-	-	-	-
3AL2	A	Q92547	-	-	-	-	-	-	-	-	-	-	-	-	8.3	2.7	89	220	16	MOLECULE: DNA TOPOISOMERASE 2-BINDING PROTEIN 1;	-	-	-	-	-	-	-	-	-	-	-	-	-	IPR026993;IPR016126;IPR001357	Y	TOPBP1	9606 [Organism: human] [Scientific Name: Homo sapiens]	Y	26	-	-	-	-	-	-	-	-	-	-
3AL2	A	Q92547	-	-	-	-	-	-	-	-	-	-	-	-	8.3	2.7	89	220	16	MOLECULE: DNA TOPOISOMERASE 2-BINDING PROTEIN 1;	-	-	-	-	-	-	-	-	-	-	-	-	-	IPR026993;IPR016126;IPR001357	Y	TOPBP1	9606 [Organism: human] [Scientific Name: Homo sapiens]	Y	20	3PD7-A00	-	-	-	-	-	-	-	-	-
3AL2	A	Q92547	-	-	-	-	-	-	-	-	-	-	-	-	8.3	2.7	89	220	16	MOLECULE: DNA TOPOISOMERASE 2-BINDING PROTEIN 1;	-	-	-	-	-	-	-	-	-	-	-	-	-	IPR026993;IPR016126;IPR001357	Y	TOPBP1	9606 [Organism: human] [Scientific Name: Homo sapiens]	Y	20	3PD7-A00	-	-	-	-	-	-	-	-	-
3SQD	B	Q6ZW49	-	-	-	-	-	-	-	-	-	-	-	-	9.5	2.9	87	205	18	MOLECULE: PAX-INTERACTING PROTEIN 1;	-	-	-	-	-	-	-	-	-	-	-	-	-	IPR001357	Y	PAXIP1	9606 [Organism: human] [Scientific Name: Homo sapiens]	Y	0	3SQD-A	-	-	-	-	-	-	-	-	-
3SQD	A	Q6ZW49	-	-	-	-	-	-	-	-	-	-	-	-	8.9	2.9	88	211	17	MOLECULE: PAX-INTERACTING PROTEIN 1;	-	-	-	-	-	-	-	-	-	-	-	-	-	IPR001357	Y	PAXIP1	9606 [Organism: human] [Scientific Name: Homo sapiens]	Y	0	3SQD-A	-	-	-	-	-	-	-	-	-
3K05	A	Q14676	-	-	-	-	-	-	-	-	-	-	-	-	10.9	2	83	193	17	MOLECULE: MEDIATOR OF DNA DAMAGE CHECKPOINT PROTEIN 1;	-	-	-	-	-	-	-	-	-	-	-	-	-	IPR000253;IPR008984;IPR001357	Y	MDC1	9606 [Organism: human] [Scientific Name: Homo sapiens]	Y	15	2ETX-A01	-	-	-	-	-	-	-	-	-
3K05	A	Q14676	-	-	-	-	-	-	-	-	-	-	-	-	10.9	2	83	193	17	MOLECULE: MEDIATOR OF DNA DAMAGE CHECKPOINT PROTEIN 1;	-	-	-	-	-	-	-	-	-	-	-	-	-	IPR000253;IPR008984;IPR001357	Y	MDC1	9606 [Organism: human] [Scientific Name: Homo sapiens]	Y	21	-	-	-	-	-	-	-	-	-	-
3K05	B	Q14676	-	-	-	-	-	-	-	-	-	-	-	-	10.7	1.9	83	200	17	MOLECULE: MEDIATOR OF DNA DAMAGE CHECKPOINT PROTEIN 1;	-	-	-	-	-	-	-	-	-	-	-	-	-	IPR000253;IPR008984;IPR001357	Y	MDC1	9606 [Organism: human] [Scientific Name: Homo sapiens]	Y	15	2ETX-A01	4	51.03	61.53	0.4849	0.5847	0.7458	2.19	88	90
3K05	B	Q14676	-	-	-	-	-	-	-	-	-	-	-	-	10.7	1.9	83	200	17	MOLECULE: MEDIATOR OF DNA DAMAGE CHECKPOINT PROTEIN 1;	-	-	-	-	-	-	-	-	-	-	-	-	-	IPR000253;IPR008984;IPR001357	Y	MDC1	9606 [Organism: human] [Scientific Name: Homo sapiens]	Y	21	-	4	51.03	61.53	0.4849	0.5847	0.7458	2.19	88	90
2ETX	A	Q14676	-	-	-	-	-	-	-	-	-	-	-	-	9.1	2.8	84	194	20	MOLECULE: MEDIATOR OF DNA DAMAGE CHECKPOINT PROTEIN 1;	-	-	-	-	-	-	-	-	-	-	-	-	-	IPR000253;IPR008984;IPR001357	Y	MDC1	9606 [Organism: human] [Scientific Name: Homo sapiens]	Y	15	2ETX-A01	6	50.41	59.88	0.4742	0.5633	0.6941	2	81	78
2ETX	A	Q14676	-	-	-	-	-	-	-	-	-	-	-	-	9.1	2.8	84	194	20	MOLECULE: MEDIATOR OF DNA DAMAGE CHECKPOINT PROTEIN 1;	-	-	-	-	-	-	-	-	-	-	-	-	-	IPR000253;IPR008984;IPR001357	Y	MDC1	9606 [Organism: human] [Scientific Name: Homo sapiens]	Y	21	-	6	50.41	59.88	0.4742	0.5633	0.6941	2	81	78
2ETX	B	Q14676	-	-	-	-	-	-	-	-	-	-	-	-	9	2.9	85	195	20	MOLECULE: MEDIATOR OF DNA DAMAGE CHECKPOINT PROTEIN 1;	-	-	-	-	-	-	-	-	-	-	-	-	-	IPR000253;IPR008984;IPR001357	Y	MDC1	9606 [Organism: human] [Scientific Name: Homo sapiens]	Y	15	2ETX-A01	-	-	-	-	-	-	-	-	-
2ETX	B	Q14676	-	-	-	-	-	-	-	-	-	-	-	-	9	2.9	85	195	20	MOLECULE: MEDIATOR OF DNA DAMAGE CHECKPOINT PROTEIN 1;	-	-	-	-	-	-	-	-	-	-	-	-	-	IPR000253;IPR008984;IPR001357	Y	MDC1	9606 [Organism: human] [Scientific Name: Homo sapiens]	Y	21	-	-	-	-	-	-	-	-	-	-
2ADO	B	Q14676	-	-	-	-	-	-	-	-	-	-	-	-	8.9	2.9	85	195	20	MOLECULE: MEDIATOR OF DNA DAMAGE CHECKPOINT PROTEIN 1;	-	-	-	-	-	-	-	-	-	-	-	-	-	IPR000253;IPR008984;IPR001357	Y	MDC1	9606 [Organism: human] [Scientific Name: Homo sapiens]	Y	15	2ETX-A01	-	-	-	-	-	-	-	-	-
2ADO	B	Q14676	-	-	-	-	-	-	-	-	-	-	-	-	8.9	2.9	85	195	20	MOLECULE: MEDIATOR OF DNA DAMAGE CHECKPOINT PROTEIN 1;	-	-	-	-	-	-	-	-	-	-	-	-	-	IPR000253;IPR008984;IPR001357	Y	MDC1	9606 [Organism: human] [Scientific Name: Homo sapiens]	Y	21	-	-	-	-	-	-	-	-	-	-
2ADO	A	Q14676	-	-	-	-	-	-	-	-	-	-	-	-	8.9	2.8	84	194	20	MOLECULE: MEDIATOR OF DNA DAMAGE CHECKPOINT PROTEIN 1;	-	-	-	-	-	-	-	-	-	-	-	-	-	IPR000253;IPR008984;IPR001357	Y	MDC1	9606 [Organism: human] [Scientific Name: Homo sapiens]	Y	15	2ETX-A01	-	-	-	-	-	-	-	-	-
2ADO	A	Q14676	-	-	-	-	-	-	-	-	-	-	-	-	8.9	2.8	84	194	20	MOLECULE: MEDIATOR OF DNA DAMAGE CHECKPOINT PROTEIN 1;	-	-	-	-	-	-	-	-	-	-	-	-	-	IPR000253;IPR008984;IPR001357	Y	MDC1	9606 [Organism: human] [Scientific Name: Homo sapiens]	Y	21	-	-	-	-	-	-	-	-	-	-
2AZM	B	Q14676	-	-	-	-	-	-	-	-	-	-	-	-	8.8	2.9	85	195	20	MOLECULE: MEDIATOR OF DNA DAMAGE CHECKPOINT PROTEIN 1;	-	-	-	-	-	-	-	-	-	-	-	-	-	IPR000253;IPR008984;IPR001357	Y	MDC1	9606 [Organism: human] [Scientific Name: Homo sapiens]	Y	15	2ETX-A01	-	-	-	-	-	-	-	-	-
2AZM	B	Q14676	-	-	-	-	-	-	-	-	-	-	-	-	8.8	2.9	85	195	20	MOLECULE: MEDIATOR OF DNA DAMAGE CHECKPOINT PROTEIN 1;	-	-	-	-	-	-	-	-	-	-	-	-	-	IPR000253;IPR008984;IPR001357	Y	MDC1	9606 [Organism: human] [Scientific Name: Homo sapiens]	Y	21	-	-	-	-	-	-	-	-	-	-
2AZM	A	Q14676	-	-	-	-	-	-	-	-	-	-	-	-	8.5	2.7	82	193	20	MOLECULE: MEDIATOR OF DNA DAMAGE CHECKPOINT PROTEIN 1;	-	-	-	-	-	-	-	-	-	-	-	-	-	IPR000253;IPR008984;IPR001357	Y	MDC1	9606 [Organism: human] [Scientific Name: Homo sapiens]	Y	15	2ETX-A01	-	-	-	-	-	-	-	-	-
2AZM	A	Q14676	-	-	-	-	-	-	-	-	-	-	-	-	8.5	2.7	82	193	20	MOLECULE: MEDIATOR OF DNA DAMAGE CHECKPOINT PROTEIN 1;	-	-	-	-	-	-	-	-	-	-	-	-	-	IPR000253;IPR008984;IPR001357	Y	MDC1	9606 [Organism: human] [Scientific Name: Homo sapiens]	Y	21	-	-	-	-	-	-	-	-	-	-
3L46	B	Q9H8V3	-	-	-	-	-	-	-	-	-	-	-	-	9.5	2.4	86	95	14	MOLECULE: PROTEIN ECT2;	-	-	-	-	-	-	-	-	-	-	-	-	-	IPR001357;IPR011993;IPR026817;IPR000219;IPR001849;IPR001331	Y	ECT2	9606 [Organism: human] [Scientific Name: Homo sapiens]	Y	25	3L46-A	7	45.82	56.31	0.4569	0.5615	0.7476	2.3	82	78
3L46	B	Q9H8V3	-	-	-	-	-	-	-	-	-	-	-	-	9.5	2.4	86	95	14	MOLECULE: PROTEIN ECT2;	-	-	-	-	-	-	-	-	-	-	-	-	-	IPR001357;IPR011993;IPR026817;IPR000219;IPR001849;IPR001331	Y	ECT2	9606 [Organism: human] [Scientific Name: Homo sapiens]	Y	25	3L46-A	7	45.82	56.31	0.4569	0.5615	0.7476	2.3	82	78
3L46	B	Q9H8V3	-	-	-	-	-	-	-	-	-	-	-	-	9.5	2.4	86	95	14	MOLECULE: PROTEIN ECT2;	-	-	-	-	-	-	-	-	-	-	-	-	-	IPR001357;IPR011993;IPR026817;IPR000219;IPR001849;IPR001331	Y	ECT2	9606 [Organism: human] [Scientific Name: Homo sapiens]	Y	25	3L46-A	7	45.82	56.31	0.4569	0.5615	0.7476	2.3	82	78
3L46	B	Q9H8V3	-	-	-	-	-	-	-	-	-	-	-	-	9.5	2.4	86	95	14	MOLECULE: PROTEIN ECT2;	-	-	-	-	-	-	-	-	-	-	-	-	-	IPR001357;IPR011993;IPR026817;IPR000219;IPR001849;IPR001331	Y	ECT2	9606 [Organism: human] [Scientific Name: Homo sapiens]	Y	25	3L46-A	7	45.82	56.31	0.4569	0.5615	0.7476	2.3	82	78
3L46	B	Q9H8V3	-	-	-	-	-	-	-	-	-	-	-	-	9.5	2.4	86	95	14	MOLECULE: PROTEIN ECT2;	-	-	-	-	-	-	-	-	-	-	-	-	-	IPR001357;IPR011993;IPR026817;IPR000219;IPR001849;IPR001331	Y	ECT2	9606 [Organism: human] [Scientific Name: Homo sapiens]	Y	25	3L46-A	7	45.82	56.31	0.4569	0.5615	0.7476	2.3	82	78
3L46	B	Q9H8V3	-	-	-	-	-	-	-	-	-	-	-	-	9.5	2.4	86	95	14	MOLECULE: PROTEIN ECT2;	-	-	-	-	-	-	-	-	-	-	-	-	-	IPR001357;IPR011993;IPR026817;IPR000219;IPR001849;IPR001331	Y	ECT2	9606 [Organism: human] [Scientific Name: Homo sapiens]	Y	25	3L46-A	7	45.82	56.31	0.4569	0.5615	0.7476	2.3	82	78
3L46	A	Q9H8V3	-	-	-	-	-	-	-	-	-	-	-	-	9.2	2.4	82	90	15	MOLECULE: PROTEIN ECT2;	-	-	-	-	-	-	-	-	-	-	-	-	-	IPR001357;IPR011993;IPR026817;IPR000219;IPR001849;IPR001331	Y	ECT2	9606 [Organism: human] [Scientific Name: Homo sapiens]	Y	25	3L46-A	-	-	-	-	-	-	-	-	-
3L46	A	Q9H8V3	-	-	-	-	-	-	-	-	-	-	-	-	9.2	2.4	82	90	15	MOLECULE: PROTEIN ECT2;	-	-	-	-	-	-	-	-	-	-	-	-	-	IPR001357;IPR011993;IPR026817;IPR000219;IPR001849;IPR001331	Y	ECT2	9606 [Organism: human] [Scientific Name: Homo sapiens]	Y	25	3L46-A	-	-	-	-	-	-	-	-	-
3L46	A	Q9H8V3	-	-	-	-	-	-	-	-	-	-	-	-	9.2	2.4	82	90	15	MOLECULE: PROTEIN ECT2;	-	-	-	-	-	-	-	-	-	-	-	-	-	IPR001357;IPR011993;IPR026817;IPR000219;IPR001849;IPR001331	Y	ECT2	9606 [Organism: human] [Scientific Name: Homo sapiens]	Y	25	3L46-A	-	-	-	-	-	-	-	-	-
3L46	A	Q9H8V3	-	-	-	-	-	-	-	-	-	-	-	-	9.2	2.4	82	90	15	MOLECULE: PROTEIN ECT2;	-	-	-	-	-	-	-	-	-	-	-	-	-	IPR001357;IPR011993;IPR026817;IPR000219;IPR001849;IPR001331	Y	ECT2	9606 [Organism: human] [Scientific Name: Homo sapiens]	Y	25	3L46-A	-	-	-	-	-	-	-	-	-
3L46	A	Q9H8V3	-	-	-	-	-	-	-	-	-	-	-	-	9.2	2.4	82	90	15	MOLECULE: PROTEIN ECT2;	-	-	-	-	-	-	-	-	-	-	-	-	-	IPR001357;IPR011993;IPR026817;IPR000219;IPR001849;IPR001331	Y	ECT2	9606 [Organism: human] [Scientific Name: Homo sapiens]	Y	25	3L46-A	-	-	-	-	-	-	-	-	-
3L46	A	Q9H8V3	-	-	-	-	-	-	-	-	-	-	-	-	9.2	2.4	82	90	15	MOLECULE: PROTEIN ECT2;	-	-	-	-	-	-	-	-	-	-	-	-	-	IPR001357;IPR011993;IPR026817;IPR000219;IPR001849;IPR001331	Y	ECT2	9606 [Organism: human] [Scientific Name: Homo sapiens]	Y	25	3L46-A	-	-	-	-	-	-	-	-	-
3OLC	X	Q92547	-	-	-	-	-	-	-	-	-	-	-	-	10.7	2	84	280	19	MOLECULE: DNA TOPOISOMERASE 2-BINDING PROTEIN 1;	-	-	-	-	-	-	-	-	-	-	-	-	-	IPR026993;IPR016126;IPR001357	Y	TOPBP1	9606 [Organism: human] [Scientific Name: Homo sapiens]	Y	23	1WF6-A01	3	46.97	58.86	0.4792	0.6006	0.8012	2.17	83	78
3OLC	X	Q92547	-	-	-	-	-	-	-	-	-	-	-	-	10.7	2	84	280	19	MOLECULE: DNA TOPOISOMERASE 2-BINDING PROTEIN 1;	-	-	-	-	-	-	-	-	-	-	-	-	-	IPR026993;IPR016126;IPR001357	Y	TOPBP1	9606 [Organism: human] [Scientific Name: Homo sapiens]	Y	20	3PD7-A00	3	46.97	58.86	0.4792	0.6006	0.8012	2.17	83	78
3OLC	X	Q92547	-	-	-	-	-	-	-	-	-	-	-	-	10.7	2	84	280	19	MOLECULE: DNA TOPOISOMERASE 2-BINDING PROTEIN 1;	-	-	-	-	-	-	-	-	-	-	-	-	-	IPR026993;IPR016126;IPR001357	Y	TOPBP1	9606 [Organism: human] [Scientific Name: Homo sapiens]	Y	11	-	3	46.97	58.86	0.4792	0.6006	0.8012	2.17	83	78
3OLC	X	Q92547	-	-	-	-	-	-	-	-	-	-	-	-	10.7	2	84	280	19	MOLECULE: DNA TOPOISOMERASE 2-BINDING PROTEIN 1;	-	-	-	-	-	-	-	-	-	-	-	-	-	IPR026993;IPR016126;IPR001357	Y	TOPBP1	9606 [Organism: human] [Scientific Name: Homo sapiens]	Y	26	-	3	46.97	58.86	0.4792	0.6006	0.8012	2.17	83	78
3OLC	X	Q92547	-	-	-	-	-	-	-	-	-	-	-	-	10.7	2	84	280	19	MOLECULE: DNA TOPOISOMERASE 2-BINDING PROTEIN 1;	-	-	-	-	-	-	-	-	-	-	-	-	-	IPR026993;IPR016126;IPR001357	Y	TOPBP1	9606 [Organism: human] [Scientific Name: Homo sapiens]	Y	20	3PD7-A00	3	46.97	58.86	0.4792	0.6006	0.8012	2.17	83	78
3OLC	X	Q92547	-	-	-	-	-	-	-	-	-	-	-	-	10.7	2	84	280	19	MOLECULE: DNA TOPOISOMERASE 2-BINDING PROTEIN 1;	-	-	-	-	-	-	-	-	-	-	-	-	-	IPR026993;IPR016126;IPR001357	Y	TOPBP1	9606 [Organism: human] [Scientific Name: Homo sapiens]	Y	20	3PD7-A00	3	46.97	58.86	0.4792	0.6006	0.8012	2.17	83	78
3OLC	X	Q92547	-	-	-	-	-	-	-	-	-	-	-	-	10.7	2	84	280	19	MOLECULE: DNA TOPOISOMERASE 2-BINDING PROTEIN 1;	-	-	-	-	-	-	-	-	-	-	-	-	-	IPR026993;IPR016126;IPR001357	Y	TOPBP1	9606 [Organism: human] [Scientific Name: Homo sapiens]	Y	23	1WF6-A01	9	45.51	56.65	0.4439	0.5526	0.7181	2.22	81	83
3OLC	X	Q92547	-	-	-	-	-	-	-	-	-	-	-	-	10.7	2	84	280	19	MOLECULE: DNA TOPOISOMERASE 2-BINDING PROTEIN 1;	-	-	-	-	-	-	-	-	-	-	-	-	-	IPR026993;IPR016126;IPR001357	Y	TOPBP1	9606 [Organism: human] [Scientific Name: Homo sapiens]	Y	20	3PD7-A00	9	45.51	56.65	0.4439	0.5526	0.7181	2.22	81	83
3OLC	X	Q92547	-	-	-	-	-	-	-	-	-	-	-	-	10.7	2	84	280	19	MOLECULE: DNA TOPOISOMERASE 2-BINDING PROTEIN 1;	-	-	-	-	-	-	-	-	-	-	-	-	-	IPR026993;IPR016126;IPR001357	Y	TOPBP1	9606 [Organism: human] [Scientific Name: Homo sapiens]	Y	11	-	9	45.51	56.65	0.4439	0.5526	0.7181	2.22	81	83
3OLC	X	Q92547	-	-	-	-	-	-	-	-	-	-	-	-	10.7	2	84	280	19	MOLECULE: DNA TOPOISOMERASE 2-BINDING PROTEIN 1;	-	-	-	-	-	-	-	-	-	-	-	-	-	IPR026993;IPR016126;IPR001357	Y	TOPBP1	9606 [Organism: human] [Scientific Name: Homo sapiens]	Y	26	-	9	45.51	56.65	0.4439	0.5526	0.7181	2.22	81	83
3OLC	X	Q92547	-	-	-	-	-	-	-	-	-	-	-	-	10.7	2	84	280	19	MOLECULE: DNA TOPOISOMERASE 2-BINDING PROTEIN 1;	-	-	-	-	-	-	-	-	-	-	-	-	-	IPR026993;IPR016126;IPR001357	Y	TOPBP1	9606 [Organism: human] [Scientific Name: Homo sapiens]	Y	20	3PD7-A00	9	45.51	56.65	0.4439	0.5526	0.7181	2.22	81	83
3OLC	X	Q92547	-	-	-	-	-	-	-	-	-	-	-	-	10.7	2	84	280	19	MOLECULE: DNA TOPOISOMERASE 2-BINDING PROTEIN 1;	-	-	-	-	-	-	-	-	-	-	-	-	-	IPR026993;IPR016126;IPR001357	Y	TOPBP1	9606 [Organism: human] [Scientific Name: Homo sapiens]	Y	20	3PD7-A00	9	45.51	56.65	0.4439	0.5526	0.7181	2.22	81	83
2XNH	A	Q92547	-	-	-	-	-	-	-	-	-	-	-	-	10.5	2.1	84	281	19	MOLECULE: DNA TOPOISOMERASE 2-BINDING PROTEIN 1;	-	-	-	-	-	-	-	-	-	-	-	-	-	IPR026993;IPR016126;IPR001357	Y	TOPBP1	9606 [Organism: human] [Scientific Name: Homo sapiens]	Y	23	1WF6-A01	-	-	-	-	-	-	-	-	-
2XNH	A	Q92547	-	-	-	-	-	-	-	-	-	-	-	-	10.5	2.1	84	281	19	MOLECULE: DNA TOPOISOMERASE 2-BINDING PROTEIN 1;	-	-	-	-	-	-	-	-	-	-	-	-	-	IPR026993;IPR016126;IPR001357	Y	TOPBP1	9606 [Organism: human] [Scientific Name: Homo sapiens]	Y	20	3PD7-A00	-	-	-	-	-	-	-	-	-
2XNH	A	Q92547	-	-	-	-	-	-	-	-	-	-	-	-	10.5	2.1	84	281	19	MOLECULE: DNA TOPOISOMERASE 2-BINDING PROTEIN 1;	-	-	-	-	-	-	-	-	-	-	-	-	-	IPR026993;IPR016126;IPR001357	Y	TOPBP1	9606 [Organism: human] [Scientific Name: Homo sapiens]	Y	11	-	-	-	-	-	-	-	-	-	-
2XNH	A	Q92547	-	-	-	-	-	-	-	-	-	-	-	-	10.5	2.1	84	281	19	MOLECULE: DNA TOPOISOMERASE 2-BINDING PROTEIN 1;	-	-	-	-	-	-	-	-	-	-	-	-	-	IPR026993;IPR016126;IPR001357	Y	TOPBP1	9606 [Organism: human] [Scientific Name: Homo sapiens]	Y	26	-	-	-	-	-	-	-	-	-	-
2XNH	A	Q92547	-	-	-	-	-	-	-	-	-	-	-	-	10.5	2.1	84	281	19	MOLECULE: DNA TOPOISOMERASE 2-BINDING PROTEIN 1;	-	-	-	-	-	-	-	-	-	-	-	-	-	IPR026993;IPR016126;IPR001357	Y	TOPBP1	9606 [Organism: human] [Scientific Name: Homo sapiens]	Y	20	3PD7-A00	-	-	-	-	-	-	-	-	-
2XNH	A	Q92547	-	-	-	-	-	-	-	-	-	-	-	-	10.5	2.1	84	281	19	MOLECULE: DNA TOPOISOMERASE 2-BINDING PROTEIN 1;	-	-	-	-	-	-	-	-	-	-	-	-	-	IPR026993;IPR016126;IPR001357	Y	TOPBP1	9606 [Organism: human] [Scientific Name: Homo sapiens]	Y	20	3PD7-A00	-	-	-	-	-	-	-	-	-
2XNK	A	Q92547	-	-	-	-	-	-	-	-	-	-	-	-	10.2	2.3	85	291	19	MOLECULE: DNA TOPOISOMERASE 2-BINDING PROTEIN 1;	-	-	-	-	-	-	-	-	-	-	-	-	-	IPR026993;IPR016126;IPR001357	Y	TOPBP1	9606 [Organism: human] [Scientific Name: Homo sapiens]	Y	23	1WF6-A01	-	-	-	-	-	-	-	-	-
2XNK	A	Q92547	-	-	-	-	-	-	-	-	-	-	-	-	10.2	2.3	85	291	19	MOLECULE: DNA TOPOISOMERASE 2-BINDING PROTEIN 1;	-	-	-	-	-	-	-	-	-	-	-	-	-	IPR026993;IPR016126;IPR001357	Y	TOPBP1	9606 [Organism: human] [Scientific Name: Homo sapiens]	Y	20	3PD7-A00	-	-	-	-	-	-	-	-	-
2XNK	A	Q92547	-	-	-	-	-	-	-	-	-	-	-	-	10.2	2.3	85	291	19	MOLECULE: DNA TOPOISOMERASE 2-BINDING PROTEIN 1;	-	-	-	-	-	-	-	-	-	-	-	-	-	IPR026993;IPR016126;IPR001357	Y	TOPBP1	9606 [Organism: human] [Scientific Name: Homo sapiens]	Y	11	-	-	-	-	-	-	-	-	-	-
2XNK	A	Q92547	-	-	-	-	-	-	-	-	-	-	-	-	10.2	2.3	85	291	19	MOLECULE: DNA TOPOISOMERASE 2-BINDING PROTEIN 1;	-	-	-	-	-	-	-	-	-	-	-	-	-	IPR026993;IPR016126;IPR001357	Y	TOPBP1	9606 [Organism: human] [Scientific Name: Homo sapiens]	Y	26	-	-	-	-	-	-	-	-	-	-
2XNK	A	Q92547	-	-	-	-	-	-	-	-	-	-	-	-	10.2	2.3	85	291	19	MOLECULE: DNA TOPOISOMERASE 2-BINDING PROTEIN 1;	-	-	-	-	-	-	-	-	-	-	-	-	-	IPR026993;IPR016126;IPR001357	Y	TOPBP1	9606 [Organism: human] [Scientific Name: Homo sapiens]	Y	20	3PD7-A00	-	-	-	-	-	-	-	-	-
2XNK	A	Q92547	-	-	-	-	-	-	-	-	-	-	-	-	10.2	2.3	85	291	19	MOLECULE: DNA TOPOISOMERASE 2-BINDING PROTEIN 1;	-	-	-	-	-	-	-	-	-	-	-	-	-	IPR026993;IPR016126;IPR001357	Y	TOPBP1	9606 [Organism: human] [Scientific Name: Homo sapiens]	Y	20	3PD7-A00	-	-	-	-	-	-	-	-	-
2XNK	B	Q92547	-	-	-	-	-	-	-	-	-	-	-	-	10.2	2.1	84	290	19	MOLECULE: DNA TOPOISOMERASE 2-BINDING PROTEIN 1;	-	-	-	-	-	-	-	-	-	-	-	-	-	IPR026993;IPR016126;IPR001357	Y	TOPBP1	9606 [Organism: human] [Scientific Name: Homo sapiens]	Y	23	1WF6-A01	-	-	-	-	-	-	-	-	-
2XNK	B	Q92547	-	-	-	-	-	-	-	-	-	-	-	-	10.2	2.1	84	290	19	MOLECULE: DNA TOPOISOMERASE 2-BINDING PROTEIN 1;	-	-	-	-	-	-	-	-	-	-	-	-	-	IPR026993;IPR016126;IPR001357	Y	TOPBP1	9606 [Organism: human] [Scientific Name: Homo sapiens]	Y	20	3PD7-A00	-	-	-	-	-	-	-	-	-
2XNK	B	Q92547	-	-	-	-	-	-	-	-	-	-	-	-	10.2	2.1	84	290	19	MOLECULE: DNA TOPOISOMERASE 2-BINDING PROTEIN 1;	-	-	-	-	-	-	-	-	-	-	-	-	-	IPR026993;IPR016126;IPR001357	Y	TOPBP1	9606 [Organism: human] [Scientific Name: Homo sapiens]	Y	11	-	-	-	-	-	-	-	-	-	-
2XNK	B	Q92547	-	-	-	-	-	-	-	-	-	-	-	-	10.2	2.1	84	290	19	MOLECULE: DNA TOPOISOMERASE 2-BINDING PROTEIN 1;	-	-	-	-	-	-	-	-	-	-	-	-	-	IPR026993;IPR016126;IPR001357	Y	TOPBP1	9606 [Organism: human] [Scientific Name: Homo sapiens]	Y	26	-	-	-	-	-	-	-	-	-	-
2XNK	B	Q92547	-	-	-	-	-	-	-	-	-	-	-	-	10.2	2.1	84	290	19	MOLECULE: DNA TOPOISOMERASE 2-BINDING PROTEIN 1;	-	-	-	-	-	-	-	-	-	-	-	-	-	IPR026993;IPR016126;IPR001357	Y	TOPBP1	9606 [Organism: human] [Scientific Name: Homo sapiens]	Y	20	3PD7-A00	-	-	-	-	-	-	-	-	-
2XNK	B	Q92547	-	-	-	-	-	-	-	-	-	-	-	-	10.2	2.1	84	290	19	MOLECULE: DNA TOPOISOMERASE 2-BINDING PROTEIN 1;	-	-	-	-	-	-	-	-	-	-	-	-	-	IPR026993;IPR016126;IPR001357	Y	TOPBP1	9606 [Organism: human] [Scientific Name: Homo sapiens]	Y	20	3PD7-A00	-	-	-	-	-	-	-	-	-
2XNK	C	Q92547	-	-	-	-	-	-	-	-	-	-	-	-	7.4	2.3	86	289	17	MOLECULE: DNA TOPOISOMERASE 2-BINDING PROTEIN 1;	-	-	-	-	-	-	-	-	-	-	-	-	-	IPR026993;IPR016126;IPR001357	Y	TOPBP1	9606 [Organism: human] [Scientific Name: Homo sapiens]	Y	23	1WF6-A01	-	-	-	-	-	-	-	-	-
2XNK	C	Q92547	-	-	-	-	-	-	-	-	-	-	-	-	7.4	2.3	86	289	17	MOLECULE: DNA TOPOISOMERASE 2-BINDING PROTEIN 1;	-	-	-	-	-	-	-	-	-	-	-	-	-	IPR026993;IPR016126;IPR001357	Y	TOPBP1	9606 [Organism: human] [Scientific Name: Homo sapiens]	Y	20	3PD7-A00	-	-	-	-	-	-	-	-	-
2XNK	C	Q92547	-	-	-	-	-	-	-	-	-	-	-	-	7.4	2.3	86	289	17	MOLECULE: DNA TOPOISOMERASE 2-BINDING PROTEIN 1;	-	-	-	-	-	-	-	-	-	-	-	-	-	IPR026993;IPR016126;IPR001357	Y	TOPBP1	9606 [Organism: human] [Scientific Name: Homo sapiens]	Y	11	-	-	-	-	-	-	-	-	-	-
2XNK	C	Q92547	-	-	-	-	-	-	-	-	-	-	-	-	7.4	2.3	86	289	17	MOLECULE: DNA TOPOISOMERASE 2-BINDING PROTEIN 1;	-	-	-	-	-	-	-	-	-	-	-	-	-	IPR026993;IPR016126;IPR001357	Y	TOPBP1	9606 [Organism: human] [Scientific Name: Homo sapiens]	Y	26	-	-	-	-	-	-	-	-	-	-
2XNK	C	Q92547	-	-	-	-	-	-	-	-	-	-	-	-	7.4	2.3	86	289	17	MOLECULE: DNA TOPOISOMERASE 2-BINDING PROTEIN 1;	-	-	-	-	-	-	-	-	-	-	-	-	-	IPR026993;IPR016126;IPR001357	Y	TOPBP1	9606 [Organism: human] [Scientific Name: Homo sapiens]	Y	20	3PD7-A00	-	-	-	-	-	-	-	-	-
2XNK	C	Q92547	-	-	-	-	-	-	-	-	-	-	-	-	7.4	2.3	86	289	17	MOLECULE: DNA TOPOISOMERASE 2-BINDING PROTEIN 1;	-	-	-	-	-	-	-	-	-	-	-	-	-	IPR026993;IPR016126;IPR001357	Y	TOPBP1	9606 [Organism: human] [Scientific Name: Homo sapiens]	Y	20	3PD7-A00	-	-	-	-	-	-	-	-	-
2XNK	D	Q92547	-	-	-	-	-	-	-	-	-	-	-	-	5.4	2.2	85	290	18	MOLECULE: DNA TOPOISOMERASE 2-BINDING PROTEIN 1;	-	-	-	-	-	-	-	-	-	-	-	-	-	IPR026993;IPR016126;IPR001357	Y	TOPBP1	9606 [Organism: human] [Scientific Name: Homo sapiens]	Y	23	1WF6-A01	-	-	-	-	-	-	-	-	-
2XNK	D	Q92547	-	-	-	-	-	-	-	-	-	-	-	-	5.4	2.2	85	290	18	MOLECULE: DNA TOPOISOMERASE 2-BINDING PROTEIN 1;	-	-	-	-	-	-	-	-	-	-	-	-	-	IPR026993;IPR016126;IPR001357	Y	TOPBP1	9606 [Organism: human] [Scientific Name: Homo sapiens]	Y	20	3PD7-A00	-	-	-	-	-	-	-	-	-
2XNK	D	Q92547	-	-	-	-	-	-	-	-	-	-	-	-	5.4	2.2	85	290	18	MOLECULE: DNA TOPOISOMERASE 2-BINDING PROTEIN 1;	-	-	-	-	-	-	-	-	-	-	-	-	-	IPR026993;IPR016126;IPR001357	Y	TOPBP1	9606 [Organism: human] [Scientific Name: Homo sapiens]	Y	11	-	-	-	-	-	-	-	-	-	-
2XNK	D	Q92547	-	-	-	-	-	-	-	-	-	-	-	-	5.4	2.2	85	290	18	MOLECULE: DNA TOPOISOMERASE 2-BINDING PROTEIN 1;	-	-	-	-	-	-	-	-	-	-	-	-	-	IPR026993;IPR016126;IPR001357	Y	TOPBP1	9606 [Organism: human] [Scientific Name: Homo sapiens]	Y	26	-	-	-	-	-	-	-	-	-	-
2XNK	D	Q92547	-	-	-	-	-	-	-	-	-	-	-	-	5.4	2.2	85	290	18	MOLECULE: DNA TOPOISOMERASE 2-BINDING PROTEIN 1;	-	-	-	-	-	-	-	-	-	-	-	-	-	IPR026993;IPR016126;IPR001357	Y	TOPBP1	9606 [Organism: human] [Scientific Name: Homo sapiens]	Y	20	3PD7-A00	-	-	-	-	-	-	-	-	-
2XNK	D	Q92547	-	-	-	-	-	-	-	-	-	-	-	-	5.4	2.2	85	290	18	MOLECULE: DNA TOPOISOMERASE 2-BINDING PROTEIN 1;	-	-	-	-	-	-	-	-	-	-	-	-	-	IPR026993;IPR016126;IPR001357	Y	TOPBP1	9606 [Organism: human] [Scientific Name: Homo sapiens]	Y	20	3PD7-A00	-	-	-	-	-	-	-	-	-
3UEO	B	Q92547	-	-	-	-	-	-	-	-	-	-	-	-	10.1	2	83	186	17	MOLECULE: DNA TOPOISOMERASE 2-BINDING PROTEIN 1;	-	-	-	-	-	-	-	-	-	-	-	-	-	IPR026993;IPR016126;IPR001357	Y	TOPBP1	9606 [Organism: human] [Scientific Name: Homo sapiens]	Y	23	1WF6-A01	-	-	-	-	-	-	-	-	-
3UEO	B	Q92547	-	-	-	-	-	-	-	-	-	-	-	-	10.1	2	83	186	17	MOLECULE: DNA TOPOISOMERASE 2-BINDING PROTEIN 1;	-	-	-	-	-	-	-	-	-	-	-	-	-	IPR026993;IPR016126;IPR001357	Y	TOPBP1	9606 [Organism: human] [Scientific Name: Homo sapiens]	Y	20	3PD7-A00	-	-	-	-	-	-	-	-	-
3UEO	B	Q92547	-	-	-	-	-	-	-	-	-	-	-	-	10.1	2	83	186	17	MOLECULE: DNA TOPOISOMERASE 2-BINDING PROTEIN 1;	-	-	-	-	-	-	-	-	-	-	-	-	-	IPR026993;IPR016126;IPR001357	Y	TOPBP1	9606 [Organism: human] [Scientific Name: Homo sapiens]	Y	11	-	-	-	-	-	-	-	-	-	-
3UEO	B	Q92547	-	-	-	-	-	-	-	-	-	-	-	-	10.1	2	83	186	17	MOLECULE: DNA TOPOISOMERASE 2-BINDING PROTEIN 1;	-	-	-	-	-	-	-	-	-	-	-	-	-	IPR026993;IPR016126;IPR001357	Y	TOPBP1	9606 [Organism: human] [Scientific Name: Homo sapiens]	Y	26	-	-	-	-	-	-	-	-	-	-
3UEO	B	Q92547	-	-	-	-	-	-	-	-	-	-	-	-	10.1	2	83	186	17	MOLECULE: DNA TOPOISOMERASE 2-BINDING PROTEIN 1;	-	-	-	-	-	-	-	-	-	-	-	-	-	IPR026993;IPR016126;IPR001357	Y	TOPBP1	9606 [Organism: human] [Scientific Name: Homo sapiens]	Y	20	3PD7-A00	-	-	-	-	-	-	-	-	-
3UEO	B	Q92547	-	-	-	-	-	-	-	-	-	-	-	-	10.1	2	83	186	17	MOLECULE: DNA TOPOISOMERASE 2-BINDING PROTEIN 1;	-	-	-	-	-	-	-	-	-	-	-	-	-	IPR026993;IPR016126;IPR001357	Y	TOPBP1	9606 [Organism: human] [Scientific Name: Homo sapiens]	Y	20	3PD7-A00	-	-	-	-	-	-	-	-	-
3UEO	A	Q92547	-	-	-	-	-	-	-	-	-	-	-	-	10.1	2	83	186	17	MOLECULE: DNA TOPOISOMERASE 2-BINDING PROTEIN 1;	-	-	-	-	-	-	-	-	-	-	-	-	-	IPR026993;IPR016126;IPR001357	Y	TOPBP1	9606 [Organism: human] [Scientific Name: Homo sapiens]	Y	23	1WF6-A01	-	-	-	-	-	-	-	-	-
3UEO	A	Q92547	-	-	-	-	-	-	-	-	-	-	-	-	10.1	2	83	186	17	MOLECULE: DNA TOPOISOMERASE 2-BINDING PROTEIN 1;	-	-	-	-	-	-	-	-	-	-	-	-	-	IPR026993;IPR016126;IPR001357	Y	TOPBP1	9606 [Organism: human] [Scientific Name: Homo sapiens]	Y	20	3PD7-A00	-	-	-	-	-	-	-	-	-
3UEO	A	Q92547	-	-	-	-	-	-	-	-	-	-	-	-	10.1	2	83	186	17	MOLECULE: DNA TOPOISOMERASE 2-BINDING PROTEIN 1;	-	-	-	-	-	-	-	-	-	-	-	-	-	IPR026993;IPR016126;IPR001357	Y	TOPBP1	9606 [Organism: human] [Scientific Name: Homo sapiens]	Y	11	-	-	-	-	-	-	-	-	-	-
3UEO	A	Q92547	-	-	-	-	-	-	-	-	-	-	-	-	10.1	2	83	186	17	MOLECULE: DNA TOPOISOMERASE 2-BINDING PROTEIN 1;	-	-	-	-	-	-	-	-	-	-	-	-	-	IPR026993;IPR016126;IPR001357	Y	TOPBP1	9606 [Organism: human] [Scientific Name: Homo sapiens]	Y	26	-	-	-	-	-	-	-	-	-	-
3UEO	A	Q92547	-	-	-	-	-	-	-	-	-	-	-	-	10.1	2	83	186	17	MOLECULE: DNA TOPOISOMERASE 2-BINDING PROTEIN 1;	-	-	-	-	-	-	-	-	-	-	-	-	-	IPR026993;IPR016126;IPR001357	Y	TOPBP1	9606 [Organism: human] [Scientific Name: Homo sapiens]	Y	20	3PD7-A00	-	-	-	-	-	-	-	-	-
3UEO	A	Q92547	-	-	-	-	-	-	-	-	-	-	-	-	10.1	2	83	186	17	MOLECULE: DNA TOPOISOMERASE 2-BINDING PROTEIN 1;	-	-	-	-	-	-	-	-	-	-	-	-	-	IPR026993;IPR016126;IPR001357	Y	TOPBP1	9606 [Organism: human] [Scientific Name: Homo sapiens]	Y	20	3PD7-A00	-	-	-	-	-	-	-	-	-
3UEO	C	Q92547	-	-	-	-	-	-	-	-	-	-	-	-	9.8	2	83	186	17	MOLECULE: DNA TOPOISOMERASE 2-BINDING PROTEIN 1;	-	-	-	-	-	-	-	-	-	-	-	-	-	IPR026993;IPR016126;IPR001357	Y	TOPBP1	9606 [Organism: human] [Scientific Name: Homo sapiens]	Y	23	1WF6-A01	-	-	-	-	-	-	-	-	-
3UEO	C	Q92547	-	-	-	-	-	-	-	-	-	-	-	-	9.8	2	83	186	17	MOLECULE: DNA TOPOISOMERASE 2-BINDING PROTEIN 1;	-	-	-	-	-	-	-	-	-	-	-	-	-	IPR026993;IPR016126;IPR001357	Y	TOPBP1	9606 [Organism: human] [Scientific Name: Homo sapiens]	Y	20	3PD7-A00	-	-	-	-	-	-	-	-	-
3UEO	C	Q92547	-	-	-	-	-	-	-	-	-	-	-	-	9.8	2	83	186	17	MOLECULE: DNA TOPOISOMERASE 2-BINDING PROTEIN 1;	-	-	-	-	-	-	-	-	-	-	-	-	-	IPR026993;IPR016126;IPR001357	Y	TOPBP1	9606 [Organism: human] [Scientific Name: Homo sapiens]	Y	11	-	-	-	-	-	-	-	-	-	-
3UEO	C	Q92547	-	-	-	-	-	-	-	-	-	-	-	-	9.8	2	83	186	17	MOLECULE: DNA TOPOISOMERASE 2-BINDING PROTEIN 1;	-	-	-	-	-	-	-	-	-	-	-	-	-	IPR026993;IPR016126;IPR001357	Y	TOPBP1	9606 [Organism: human] [Scientific Name: Homo sapiens]	Y	26	-	-	-	-	-	-	-	-	-	-
3UEO	C	Q92547	-	-	-	-	-	-	-	-	-	-	-	-	9.8	2	83	186	17	MOLECULE: DNA TOPOISOMERASE 2-BINDING PROTEIN 1;	-	-	-	-	-	-	-	-	-	-	-	-	-	IPR026993;IPR016126;IPR001357	Y	TOPBP1	9606 [Organism: human] [Scientific Name: Homo sapiens]	Y	20	3PD7-A00	-	-	-	-	-	-	-	-	-
3UEO	C	Q92547	-	-	-	-	-	-	-	-	-	-	-	-	9.8	2	83	186	17	MOLECULE: DNA TOPOISOMERASE 2-BINDING PROTEIN 1;	-	-	-	-	-	-	-	-	-	-	-	-	-	IPR026993;IPR016126;IPR001357	Y	TOPBP1	9606 [Organism: human] [Scientific Name: Homo sapiens]	Y	20	3PD7-A00	-	-	-	-	-	-	-	-	-
3UEO	D	Q92547	-	-	-	-	-	-	-	-	-	-	-	-	9.8	2	83	186	17	MOLECULE: DNA TOPOISOMERASE 2-BINDING PROTEIN 1;	-	-	-	-	-	-	-	-	-	-	-	-	-	IPR026993;IPR016126;IPR001357	Y	TOPBP1	9606 [Organism: human] [Scientific Name: Homo sapiens]	Y	23	1WF6-A01	-	-	-	-	-	-	-	-	-
3UEO	D	Q92547	-	-	-	-	-	-	-	-	-	-	-	-	9.8	2	83	186	17	MOLECULE: DNA TOPOISOMERASE 2-BINDING PROTEIN 1;	-	-	-	-	-	-	-	-	-	-	-	-	-	IPR026993;IPR016126;IPR001357	Y	TOPBP1	9606 [Organism: human] [Scientific Name: Homo sapiens]	Y	20	3PD7-A00	-	-	-	-	-	-	-	-	-
3UEO	D	Q92547	-	-	-	-	-	-	-	-	-	-	-	-	9.8	2	83	186	17	MOLECULE: DNA TOPOISOMERASE 2-BINDING PROTEIN 1;	-	-	-	-	-	-	-	-	-	-	-	-	-	IPR026993;IPR016126;IPR001357	Y	TOPBP1	9606 [Organism: human] [Scientific Name: Homo sapiens]	Y	11	-	-	-	-	-	-	-	-	-	-
3UEO	D	Q92547	-	-	-	-	-	-	-	-	-	-	-	-	9.8	2	83	186	17	MOLECULE: DNA TOPOISOMERASE 2-BINDING PROTEIN 1;	-	-	-	-	-	-	-	-	-	-	-	-	-	IPR026993;IPR016126;IPR001357	Y	TOPBP1	9606 [Organism: human] [Scientific Name: Homo sapiens]	Y	26	-	-	-	-	-	-	-	-	-	-
3UEO	D	Q92547	-	-	-	-	-	-	-	-	-	-	-	-	9.8	2	83	186	17	MOLECULE: DNA TOPOISOMERASE 2-BINDING PROTEIN 1;	-	-	-	-	-	-	-	-	-	-	-	-	-	IPR026993;IPR016126;IPR001357	Y	TOPBP1	9606 [Organism: human] [Scientific Name: Homo sapiens]	Y	20	3PD7-A00	-	-	-	-	-	-	-	-	-
3UEO	D	Q92547	-	-	-	-	-	-	-	-	-	-	-	-	9.8	2	83	186	17	MOLECULE: DNA TOPOISOMERASE 2-BINDING PROTEIN 1;	-	-	-	-	-	-	-	-	-	-	-	-	-	IPR026993;IPR016126;IPR001357	Y	TOPBP1	9606 [Organism: human] [Scientific Name: Homo sapiens]	Y	20	3PD7-A00	-	-	-	-	-	-	-	-	-
3UEN	A	Q92547	-	-	-	-	-	-	-	-	-	-	-	-	9.8	2	83	195	17	MOLECULE: DNA TOPOISOMERASE 2-BINDING PROTEIN 1;	-	-	-	-	-	-	-	-	-	-	-	-	-	IPR026993;IPR016126;IPR001357	Y	TOPBP1	9606 [Organism: human] [Scientific Name: Homo sapiens]	Y	23	1WF6-A01	-	-	-	-	-	-	-	-	-
3UEN	A	Q92547	-	-	-	-	-	-	-	-	-	-	-	-	9.8	2	83	195	17	MOLECULE: DNA TOPOISOMERASE 2-BINDING PROTEIN 1;	-	-	-	-	-	-	-	-	-	-	-	-	-	IPR026993;IPR016126;IPR001357	Y	TOPBP1	9606 [Organism: human] [Scientific Name: Homo sapiens]	Y	20	3PD7-A00	-	-	-	-	-	-	-	-	-
3UEN	A	Q92547	-	-	-	-	-	-	-	-	-	-	-	-	9.8	2	83	195	17	MOLECULE: DNA TOPOISOMERASE 2-BINDING PROTEIN 1;	-	-	-	-	-	-	-	-	-	-	-	-	-	IPR026993;IPR016126;IPR001357	Y	TOPBP1	9606 [Organism: human] [Scientific Name: Homo sapiens]	Y	11	-	-	-	-	-	-	-	-	-	-
3UEN	A	Q92547	-	-	-	-	-	-	-	-	-	-	-	-	9.8	2	83	195	17	MOLECULE: DNA TOPOISOMERASE 2-BINDING PROTEIN 1;	-	-	-	-	-	-	-	-	-	-	-	-	-	IPR026993;IPR016126;IPR001357	Y	TOPBP1	9606 [Organism: human] [Scientific Name: Homo sapiens]	Y	26	-	-	-	-	-	-	-	-	-	-
3UEN	A	Q92547	-	-	-	-	-	-	-	-	-	-	-	-	9.8	2	83	195	17	MOLECULE: DNA TOPOISOMERASE 2-BINDING PROTEIN 1;	-	-	-	-	-	-	-	-	-	-	-	-	-	IPR026993;IPR016126;IPR001357	Y	TOPBP1	9606 [Organism: human] [Scientific Name: Homo sapiens]	Y	20	3PD7-A00	-	-	-	-	-	-	-	-	-
3UEN	A	Q92547	-	-	-	-	-	-	-	-	-	-	-	-	9.8	2	83	195	17	MOLECULE: DNA TOPOISOMERASE 2-BINDING PROTEIN 1;	-	-	-	-	-	-	-	-	-	-	-	-	-	IPR026993;IPR016126;IPR001357	Y	TOPBP1	9606 [Organism: human] [Scientific Name: Homo sapiens]	Y	20	3PD7-A00	-	-	-	-	-	-	-	-	-
1WF6	A	Q92547	-	-	-	-	-	-	-	-	-	-	-	-	7.6	2.6	84	132	19	MOLECULE: SIMILAR TO S.POMBE -RAD4+/CUT5+PRODUCT (A40727);	-	-	-	-	-	-	-	-	-	-	-	-	-	IPR026993;IPR016126;IPR001357	Y	TOPBP1	9606 [Organism: human] [Scientific Name: Homo sapiens]	Y	23	1WF6-A01	20	45.03	58.37	0.3899	0.5055	0.6245	2.46	85	94
1WF6	A	Q92547	-	-	-	-	-	-	-	-	-	-	-	-	7.6	2.6	84	132	19	MOLECULE: SIMILAR TO S.POMBE -RAD4+/CUT5+PRODUCT (A40727);	-	-	-	-	-	-	-	-	-	-	-	-	-	IPR026993;IPR016126;IPR001357	Y	TOPBP1	9606 [Organism: human] [Scientific Name: Homo sapiens]	Y	20	3PD7-A00	20	45.03	58.37	0.3899	0.5055	0.6245	2.46	85	94
1WF6	A	Q92547	-	-	-	-	-	-	-	-	-	-	-	-	7.6	2.6	84	132	19	MOLECULE: SIMILAR TO S.POMBE -RAD4+/CUT5+PRODUCT (A40727);	-	-	-	-	-	-	-	-	-	-	-	-	-	IPR026993;IPR016126;IPR001357	Y	TOPBP1	9606 [Organism: human] [Scientific Name: Homo sapiens]	Y	11	-	20	45.03	58.37	0.3899	0.5055	0.6245	2.46	85	94
1WF6	A	Q92547	-	-	-	-	-	-	-	-	-	-	-	-	7.6	2.6	84	132	19	MOLECULE: SIMILAR TO S.POMBE -RAD4+/CUT5+PRODUCT (A40727);	-	-	-	-	-	-	-	-	-	-	-	-	-	IPR026993;IPR016126;IPR001357	Y	TOPBP1	9606 [Organism: human] [Scientific Name: Homo sapiens]	Y	26	-	20	45.03	58.37	0.3899	0.5055	0.6245	2.46	85	94
1WF6	A	Q92547	-	-	-	-	-	-	-	-	-	-	-	-	7.6	2.6	84	132	19	MOLECULE: SIMILAR TO S.POMBE -RAD4+/CUT5+PRODUCT (A40727);	-	-	-	-	-	-	-	-	-	-	-	-	-	IPR026993;IPR016126;IPR001357	Y	TOPBP1	9606 [Organism: human] [Scientific Name: Homo sapiens]	Y	20	3PD7-A00	20	45.03	58.37	0.3899	0.5055	0.6245	2.46	85	94
1WF6	A	Q92547	-	-	-	-	-	-	-	-	-	-	-	-	7.6	2.6	84	132	19	MOLECULE: SIMILAR TO S.POMBE -RAD4+/CUT5+PRODUCT (A40727);	-	-	-	-	-	-	-	-	-	-	-	-	-	IPR026993;IPR016126;IPR001357	Y	TOPBP1	9606 [Organism: human] [Scientific Name: Homo sapiens]	Y	20	3PD7-A00	20	45.03	58.37	0.3899	0.5055	0.6245	2.46	85	94
2R1Z	B	Q99728	-	-	-	-	-	-	-	-	-	-	-	-	9.4	2.7	90	208	7	MOLECULE: BRCA1-ASSOCIATED RING DOMAIN PROTEIN 1;	-	-	-	-	-	-	-	-	-	-	-	-	-	IPR002110;IPR001841;IPR017907;IPR020683;IPR001357;IPR013083	Y	BARD1	9606 [Organism: human] [Scientific Name: Homo sapiens]	Y	4	2NTE-A02	-	-	-	-	-	-	-	-	-
2R1Z	B	Q99728	-	-	-	-	-	-	-	-	-	-	-	-	9.4	2.7	90	208	7	MOLECULE: BRCA1-ASSOCIATED RING DOMAIN PROTEIN 1;	-	-	-	-	-	-	-	-	-	-	-	-	-	IPR002110;IPR001841;IPR017907;IPR020683;IPR001357;IPR013083	Y	BARD1	9606 [Organism: human] [Scientific Name: Homo sapiens]	Y	10	2NTE-B01	-	-	-	-	-	-	-	-	-
2R1Z	B	Q99728	-	-	-	-	-	-	-	-	-	-	-	-	9.4	2.7	90	208	7	MOLECULE: BRCA1-ASSOCIATED RING DOMAIN PROTEIN 1;	-	-	-	-	-	-	-	-	-	-	-	-	-	IPR002110;IPR001841;IPR017907;IPR020683;IPR001357;IPR013083	Y	BARD1	9606 [Organism: human] [Scientific Name: Homo sapiens]	Y	4	2NTE-A02	-	-	-	-	-	-	-	-	-
2R1Z	B	Q99728	-	-	-	-	-	-	-	-	-	-	-	-	9.4	2.7	90	208	7	MOLECULE: BRCA1-ASSOCIATED RING DOMAIN PROTEIN 1;	-	-	-	-	-	-	-	-	-	-	-	-	-	IPR002110;IPR001841;IPR017907;IPR020683;IPR001357;IPR013083	Y	BARD1	9606 [Organism: human] [Scientific Name: Homo sapiens]	Y	10	2NTE-B01	-	-	-	-	-	-	-	-	-
2NTE	B	Q99728	-	-	-	-	-	-	-	-	-	-	-	-	9.4	2.7	90	209	7	MOLECULE: BRCA1-ASSOCIATED RING DOMAIN PROTEIN 1;	-	-	-	-	-	-	-	-	-	-	-	-	-	IPR002110;IPR001841;IPR017907;IPR020683;IPR001357;IPR013083	Y	BARD1	9606 [Organism: human] [Scientific Name: Homo sapiens]	Y	4	2NTE-A02	18	49.16	54.5	0.4648	0.5152	0.699	2.49	88	83
2NTE	B	Q99728	-	-	-	-	-	-	-	-	-	-	-	-	9.4	2.7	90	209	7	MOLECULE: BRCA1-ASSOCIATED RING DOMAIN PROTEIN 1;	-	-	-	-	-	-	-	-	-	-	-	-	-	IPR002110;IPR001841;IPR017907;IPR020683;IPR001357;IPR013083	Y	BARD1	9606 [Organism: human] [Scientific Name: Homo sapiens]	Y	10	2NTE-B01	18	49.16	54.5	0.4648	0.5152	0.699	2.49	88	83
2NTE	B	Q99728	-	-	-	-	-	-	-	-	-	-	-	-	9.4	2.7	90	209	7	MOLECULE: BRCA1-ASSOCIATED RING DOMAIN PROTEIN 1;	-	-	-	-	-	-	-	-	-	-	-	-	-	IPR002110;IPR001841;IPR017907;IPR020683;IPR001357;IPR013083	Y	BARD1	9606 [Organism: human] [Scientific Name: Homo sapiens]	Y	4	2NTE-A02	18	49.16	54.5	0.4648	0.5152	0.699	2.49	88	83
2NTE	B	Q99728	-	-	-	-	-	-	-	-	-	-	-	-	9.4	2.7	90	209	7	MOLECULE: BRCA1-ASSOCIATED RING DOMAIN PROTEIN 1;	-	-	-	-	-	-	-	-	-	-	-	-	-	IPR002110;IPR001841;IPR017907;IPR020683;IPR001357;IPR013083	Y	BARD1	9606 [Organism: human] [Scientific Name: Homo sapiens]	Y	10	2NTE-B01	18	49.16	54.5	0.4648	0.5152	0.699	2.49	88	83
2NTE	A	Q99728	-	-	-	-	-	-	-	-	-	-	-	-	9.3	2.7	90	210	7	MOLECULE: BRCA1-ASSOCIATED RING DOMAIN PROTEIN 1;	-	-	-	-	-	-	-	-	-	-	-	-	-	IPR002110;IPR001841;IPR017907;IPR020683;IPR001357;IPR013083	Y	BARD1	9606 [Organism: human] [Scientific Name: Homo sapiens]	Y	4	2NTE-A02	28	42.85	45.16	0.3953	0.4166	0.5328	2.85	70	81
2NTE	A	Q99728	-	-	-	-	-	-	-	-	-	-	-	-	9.3	2.7	90	210	7	MOLECULE: BRCA1-ASSOCIATED RING DOMAIN PROTEIN 1;	-	-	-	-	-	-	-	-	-	-	-	-	-	IPR002110;IPR001841;IPR017907;IPR020683;IPR001357;IPR013083	Y	BARD1	9606 [Organism: human] [Scientific Name: Homo sapiens]	Y	10	2NTE-B01	28	42.85	45.16	0.3953	0.4166	0.5328	2.85	70	81
2NTE	A	Q99728	-	-	-	-	-	-	-	-	-	-	-	-	9.3	2.7	90	210	7	MOLECULE: BRCA1-ASSOCIATED RING DOMAIN PROTEIN 1;	-	-	-	-	-	-	-	-	-	-	-	-	-	IPR002110;IPR001841;IPR017907;IPR020683;IPR001357;IPR013083	Y	BARD1	9606 [Organism: human] [Scientific Name: Homo sapiens]	Y	4	2NTE-A02	28	42.85	45.16	0.3953	0.4166	0.5328	2.85	70	81
2NTE	A	Q99728	-	-	-	-	-	-	-	-	-	-	-	-	9.3	2.7	90	210	7	MOLECULE: BRCA1-ASSOCIATED RING DOMAIN PROTEIN 1;	-	-	-	-	-	-	-	-	-	-	-	-	-	IPR002110;IPR001841;IPR017907;IPR020683;IPR001357;IPR013083	Y	BARD1	9606 [Organism: human] [Scientific Name: Homo sapiens]	Y	10	2NTE-B01	28	42.85	45.16	0.3953	0.4166	0.5328	2.85	70	81
3FA2	B	Q99728	-	-	-	-	-	-	-	-	-	-	-	-	9.3	2.7	90	205	7	MOLECULE: BRCA1-ASSOCIATED RING DOMAIN PROTEIN 1;	-	-	-	-	-	-	-	-	-	-	-	-	-	IPR002110;IPR001841;IPR017907;IPR020683;IPR001357;IPR013083	Y	BARD1	9606 [Organism: human] [Scientific Name: Homo sapiens]	Y	4	2NTE-A02	-	-	-	-	-	-	-	-	-
3FA2	B	Q99728	-	-	-	-	-	-	-	-	-	-	-	-	9.3	2.7	90	205	7	MOLECULE: BRCA1-ASSOCIATED RING DOMAIN PROTEIN 1;	-	-	-	-	-	-	-	-	-	-	-	-	-	IPR002110;IPR001841;IPR017907;IPR020683;IPR001357;IPR013083	Y	BARD1	9606 [Organism: human] [Scientific Name: Homo sapiens]	Y	10	2NTE-B01	-	-	-	-	-	-	-	-	-
3FA2	B	Q99728	-	-	-	-	-	-	-	-	-	-	-	-	9.3	2.7	90	205	7	MOLECULE: BRCA1-ASSOCIATED RING DOMAIN PROTEIN 1;	-	-	-	-	-	-	-	-	-	-	-	-	-	IPR002110;IPR001841;IPR017907;IPR020683;IPR001357;IPR013083	Y	BARD1	9606 [Organism: human] [Scientific Name: Homo sapiens]	Y	4	2NTE-A02	-	-	-	-	-	-	-	-	-
3FA2	B	Q99728	-	-	-	-	-	-	-	-	-	-	-	-	9.3	2.7	90	205	7	MOLECULE: BRCA1-ASSOCIATED RING DOMAIN PROTEIN 1;	-	-	-	-	-	-	-	-	-	-	-	-	-	IPR002110;IPR001841;IPR017907;IPR020683;IPR001357;IPR013083	Y	BARD1	9606 [Organism: human] [Scientific Name: Homo sapiens]	Y	10	2NTE-B01	-	-	-	-	-	-	-	-	-
3FA2	A	Q99728	-	-	-	-	-	-	-	-	-	-	-	-	9.3	2.7	90	203	7	MOLECULE: BRCA1-ASSOCIATED RING DOMAIN PROTEIN 1;	-	-	-	-	-	-	-	-	-	-	-	-	-	IPR002110;IPR001841;IPR017907;IPR020683;IPR001357;IPR013083	Y	BARD1	9606 [Organism: human] [Scientific Name: Homo sapiens]	Y	4	2NTE-A02	-	-	-	-	-	-	-	-	-
3FA2	A	Q99728	-	-	-	-	-	-	-	-	-	-	-	-	9.3	2.7	90	203	7	MOLECULE: BRCA1-ASSOCIATED RING DOMAIN PROTEIN 1;	-	-	-	-	-	-	-	-	-	-	-	-	-	IPR002110;IPR001841;IPR017907;IPR020683;IPR001357;IPR013083	Y	BARD1	9606 [Organism: human] [Scientific Name: Homo sapiens]	Y	10	2NTE-B01	-	-	-	-	-	-	-	-	-
3FA2	A	Q99728	-	-	-	-	-	-	-	-	-	-	-	-	9.3	2.7	90	203	7	MOLECULE: BRCA1-ASSOCIATED RING DOMAIN PROTEIN 1;	-	-	-	-	-	-	-	-	-	-	-	-	-	IPR002110;IPR001841;IPR017907;IPR020683;IPR001357;IPR013083	Y	BARD1	9606 [Organism: human] [Scientific Name: Homo sapiens]	Y	4	2NTE-A02	-	-	-	-	-	-	-	-	-
3FA2	A	Q99728	-	-	-	-	-	-	-	-	-	-	-	-	9.3	2.7	90	203	7	MOLECULE: BRCA1-ASSOCIATED RING DOMAIN PROTEIN 1;	-	-	-	-	-	-	-	-	-	-	-	-	-	IPR002110;IPR001841;IPR017907;IPR020683;IPR001357;IPR013083	Y	BARD1	9606 [Organism: human] [Scientific Name: Homo sapiens]	Y	10	2NTE-B01	-	-	-	-	-	-	-	-	-
2R1Z	A	Q99728	-	-	-	-	-	-	-	-	-	-	-	-	9.3	2.7	90	202	7	MOLECULE: BRCA1-ASSOCIATED RING DOMAIN PROTEIN 1;	-	-	-	-	-	-	-	-	-	-	-	-	-	IPR002110;IPR001841;IPR017907;IPR020683;IPR001357;IPR013083	Y	BARD1	9606 [Organism: human] [Scientific Name: Homo sapiens]	Y	4	2NTE-A02	-	-	-	-	-	-	-	-	-
2R1Z	A	Q99728	-	-	-	-	-	-	-	-	-	-	-	-	9.3	2.7	90	202	7	MOLECULE: BRCA1-ASSOCIATED RING DOMAIN PROTEIN 1;	-	-	-	-	-	-	-	-	-	-	-	-	-	IPR002110;IPR001841;IPR017907;IPR020683;IPR001357;IPR013083	Y	BARD1	9606 [Organism: human] [Scientific Name: Homo sapiens]	Y	10	2NTE-B01	-	-	-	-	-	-	-	-	-
2R1Z	A	Q99728	-	-	-	-	-	-	-	-	-	-	-	-	9.3	2.7	90	202	7	MOLECULE: BRCA1-ASSOCIATED RING DOMAIN PROTEIN 1;	-	-	-	-	-	-	-	-	-	-	-	-	-	IPR002110;IPR001841;IPR017907;IPR020683;IPR001357;IPR013083	Y	BARD1	9606 [Organism: human] [Scientific Name: Homo sapiens]	Y	4	2NTE-A02	-	-	-	-	-	-	-	-	-
2R1Z	A	Q99728	-	-	-	-	-	-	-	-	-	-	-	-	9.3	2.7	90	202	7	MOLECULE: BRCA1-ASSOCIATED RING DOMAIN PROTEIN 1;	-	-	-	-	-	-	-	-	-	-	-	-	-	IPR002110;IPR001841;IPR017907;IPR020683;IPR001357;IPR013083	Y	BARD1	9606 [Organism: human] [Scientific Name: Homo sapiens]	Y	10	2NTE-B01	-	-	-	-	-	-	-	-	-
1GZH	D	Q12888	-	-	-	-	-	-	-	-	-	-	-	-	9.2	2.8	87	212	13	MOLECULE: CELLULAR TUMOR ANTIGEN P53;	-	-	-	-	-	-	-	-	-	-	-	-	-	IPR014722;IPR001357;IPR015125	Y	TP53BP1	9606 [Organism: human] [Scientific Name: Homo sapiens]	Y	1	-	22	53.99	55.54	0.4656	0.4789	0.6247	2.43	87	92
1GZH	D	Q12888	-	-	-	-	-	-	-	-	-	-	-	-	9.2	2.8	87	212	13	MOLECULE: CELLULAR TUMOR ANTIGEN P53;	-	-	-	-	-	-	-	-	-	-	-	-	-	IPR014722;IPR001357;IPR015125	Y	TP53BP1	9606 [Organism: human] [Scientific Name: Homo sapiens]	Y	7	1GZH-D02	22	53.99	55.54	0.4656	0.4789	0.6247	2.43	87	92
1GZH	D	Q12888	-	-	-	-	-	-	-	-	-	-	-	-	9.2	2.8	87	212	13	MOLECULE: CELLULAR TUMOR ANTIGEN P53;	-	-	-	-	-	-	-	-	-	-	-	-	-	IPR014722;IPR001357;IPR015125	Y	TP53BP1	9606 [Organism: human] [Scientific Name: Homo sapiens]	Y	1	-	22	53.99	55.54	0.4656	0.4789	0.6247	2.43	87	92
1GZH	D	Q12888	-	-	-	-	-	-	-	-	-	-	-	-	9.2	2.8	87	212	13	MOLECULE: CELLULAR TUMOR ANTIGEN P53;	-	-	-	-	-	-	-	-	-	-	-	-	-	IPR014722;IPR001357;IPR015125	Y	TP53BP1	9606 [Organism: human] [Scientific Name: Homo sapiens]	Y	7	1GZH-D02	22	53.99	55.54	0.4656	0.4789	0.6247	2.43	87	92
1GZH	D	Q12888	-	-	-	-	-	-	-	-	-	-	-	-	9.2	2.8	87	212	13	MOLECULE: CELLULAR TUMOR ANTIGEN P53;	-	-	-	-	-	-	-	-	-	-	-	-	-	IPR014722;IPR001357;IPR015125	Y	TP53BP1	9606 [Organism: human] [Scientific Name: Homo sapiens]	Y	1	-	22	53.99	55.54	0.4656	0.4789	0.6247	2.43	87	92
1GZH	D	Q12888	-	-	-	-	-	-	-	-	-	-	-	-	9.2	2.8	87	212	13	MOLECULE: CELLULAR TUMOR ANTIGEN P53;	-	-	-	-	-	-	-	-	-	-	-	-	-	IPR014722;IPR001357;IPR015125	Y	TP53BP1	9606 [Organism: human] [Scientific Name: Homo sapiens]	Y	7	1GZH-D02	22	53.99	55.54	0.4656	0.4789	0.6247	2.43	87	92
1GZH	D	Q12888	-	-	-	-	-	-	-	-	-	-	-	-	9.2	2.8	87	212	13	MOLECULE: CELLULAR TUMOR ANTIGEN P53;	-	-	-	-	-	-	-	-	-	-	-	-	-	IPR014722;IPR001357;IPR015125	Y	TP53BP1	9606 [Organism: human] [Scientific Name: Homo sapiens]	Y	1	-	22	53.99	55.54	0.4656	0.4789	0.6247	2.43	87	92
1GZH	D	Q12888	-	-	-	-	-	-	-	-	-	-	-	-	9.2	2.8	87	212	13	MOLECULE: CELLULAR TUMOR ANTIGEN P53;	-	-	-	-	-	-	-	-	-	-	-	-	-	IPR014722;IPR001357;IPR015125	Y	TP53BP1	9606 [Organism: human] [Scientific Name: Homo sapiens]	Y	7	1GZH-D02	22	53.99	55.54	0.4656	0.4789	0.6247	2.43	87	92
1GZH	D	Q12888	-	-	-	-	-	-	-	-	-	-	-	-	9.2	2.8	87	212	13	MOLECULE: CELLULAR TUMOR ANTIGEN P53;	-	-	-	-	-	-	-	-	-	-	-	-	-	IPR014722;IPR001357;IPR015125	Y	TP53BP1	9606 [Organism: human] [Scientific Name: Homo sapiens]	Y	1	-	22	53.99	55.54	0.4656	0.4789	0.6247	2.43	87	92
1GZH	D	Q12888	-	-	-	-	-	-	-	-	-	-	-	-	9.2	2.8	87	212	13	MOLECULE: CELLULAR TUMOR ANTIGEN P53;	-	-	-	-	-	-	-	-	-	-	-	-	-	IPR014722;IPR001357;IPR015125	Y	TP53BP1	9606 [Organism: human] [Scientific Name: Homo sapiens]	Y	7	1GZH-D02	22	53.99	55.54	0.4656	0.4789	0.6247	2.43	87	92
1GZH	D	Q12888	-	-	-	-	-	-	-	-	-	-	-	-	9.2	2.8	87	212	13	MOLECULE: CELLULAR TUMOR ANTIGEN P53;	-	-	-	-	-	-	-	-	-	-	-	-	-	IPR014722;IPR001357;IPR015125	Y	TP53BP1	9606 [Organism: human] [Scientific Name: Homo sapiens]	Y	1	-	22	53.99	55.54	0.4656	0.4789	0.6247	2.43	87	92
1GZH	D	Q12888	-	-	-	-	-	-	-	-	-	-	-	-	9.2	2.8	87	212	13	MOLECULE: CELLULAR TUMOR ANTIGEN P53;	-	-	-	-	-	-	-	-	-	-	-	-	-	IPR014722;IPR001357;IPR015125	Y	TP53BP1	9606 [Organism: human] [Scientific Name: Homo sapiens]	Y	7	1GZH-D02	22	53.99	55.54	0.4656	0.4789	0.6247	2.43	87	92
1GZH	B	Q12888	-	-	-	-	-	-	-	-	-	-	-	-	8.9	2.9	88	224	15	MOLECULE: CELLULAR TUMOR ANTIGEN P53;	-	-	-	-	-	-	-	-	-	-	-	-	-	IPR014722;IPR001357;IPR015125	Y	TP53BP1	9606 [Organism: human] [Scientific Name: Homo sapiens]	Y	1	-	12	45.87	57.39	0.4252	0.532	0.6877	2.33	87	88
1GZH	B	Q12888	-	-	-	-	-	-	-	-	-	-	-	-	8.9	2.9	88	224	15	MOLECULE: CELLULAR TUMOR ANTIGEN P53;	-	-	-	-	-	-	-	-	-	-	-	-	-	IPR014722;IPR001357;IPR015125	Y	TP53BP1	9606 [Organism: human] [Scientific Name: Homo sapiens]	Y	7	1GZH-D02	12	45.87	57.39	0.4252	0.532	0.6877	2.33	87	88
1GZH	B	Q12888	-	-	-	-	-	-	-	-	-	-	-	-	8.9	2.9	88	224	15	MOLECULE: CELLULAR TUMOR ANTIGEN P53;	-	-	-	-	-	-	-	-	-	-	-	-	-	IPR014722;IPR001357;IPR015125	Y	TP53BP1	9606 [Organism: human] [Scientific Name: Homo sapiens]	Y	1	-	12	45.87	57.39	0.4252	0.532	0.6877	2.33	87	88
1GZH	B	Q12888	-	-	-	-	-	-	-	-	-	-	-	-	8.9	2.9	88	224	15	MOLECULE: CELLULAR TUMOR ANTIGEN P53;	-	-	-	-	-	-	-	-	-	-	-	-	-	IPR014722;IPR001357;IPR015125	Y	TP53BP1	9606 [Organism: human] [Scientific Name: Homo sapiens]	Y	7	1GZH-D02	12	45.87	57.39	0.4252	0.532	0.6877	2.33	87	88
1GZH	B	Q12888	-	-	-	-	-	-	-	-	-	-	-	-	8.9	2.9	88	224	15	MOLECULE: CELLULAR TUMOR ANTIGEN P53;	-	-	-	-	-	-	-	-	-	-	-	-	-	IPR014722;IPR001357;IPR015125	Y	TP53BP1	9606 [Organism: human] [Scientific Name: Homo sapiens]	Y	1	-	12	45.87	57.39	0.4252	0.532	0.6877	2.33	87	88
1GZH	B	Q12888	-	-	-	-	-	-	-	-	-	-	-	-	8.9	2.9	88	224	15	MOLECULE: CELLULAR TUMOR ANTIGEN P53;	-	-	-	-	-	-	-	-	-	-	-	-	-	IPR014722;IPR001357;IPR015125	Y	TP53BP1	9606 [Organism: human] [Scientific Name: Homo sapiens]	Y	7	1GZH-D02	12	45.87	57.39	0.4252	0.532	0.6877	2.33	87	88
1GZH	B	Q12888	-	-	-	-	-	-	-	-	-	-	-	-	8.9	2.9	88	224	15	MOLECULE: CELLULAR TUMOR ANTIGEN P53;	-	-	-	-	-	-	-	-	-	-	-	-	-	IPR014722;IPR001357;IPR015125	Y	TP53BP1	9606 [Organism: human] [Scientific Name: Homo sapiens]	Y	1	-	12	45.87	57.39	0.4252	0.532	0.6877	2.33	87	88
1GZH	B	Q12888	-	-	-	-	-	-	-	-	-	-	-	-	8.9	2.9	88	224	15	MOLECULE: CELLULAR TUMOR ANTIGEN P53;	-	-	-	-	-	-	-	-	-	-	-	-	-	IPR014722;IPR001357;IPR015125	Y	TP53BP1	9606 [Organism: human] [Scientific Name: Homo sapiens]	Y	7	1GZH-D02	12	45.87	57.39	0.4252	0.532	0.6877	2.33	87	88
1GZH	B	Q12888	-	-	-	-	-	-	-	-	-	-	-	-	8.9	2.9	88	224	15	MOLECULE: CELLULAR TUMOR ANTIGEN P53;	-	-	-	-	-	-	-	-	-	-	-	-	-	IPR014722;IPR001357;IPR015125	Y	TP53BP1	9606 [Organism: human] [Scientific Name: Homo sapiens]	Y	1	-	12	45.87	57.39	0.4252	0.532	0.6877	2.33	87	88
1GZH	B	Q12888	-	-	-	-	-	-	-	-	-	-	-	-	8.9	2.9	88	224	15	MOLECULE: CELLULAR TUMOR ANTIGEN P53;	-	-	-	-	-	-	-	-	-	-	-	-	-	IPR014722;IPR001357;IPR015125	Y	TP53BP1	9606 [Organism: human] [Scientific Name: Homo sapiens]	Y	7	1GZH-D02	12	45.87	57.39	0.4252	0.532	0.6877	2.33	87	88
1GZH	B	Q12888	-	-	-	-	-	-	-	-	-	-	-	-	8.9	2.9	88	224	15	MOLECULE: CELLULAR TUMOR ANTIGEN P53;	-	-	-	-	-	-	-	-	-	-	-	-	-	IPR014722;IPR001357;IPR015125	Y	TP53BP1	9606 [Organism: human] [Scientific Name: Homo sapiens]	Y	1	-	12	45.87	57.39	0.4252	0.532	0.6877	2.33	87	88
1GZH	B	Q12888	-	-	-	-	-	-	-	-	-	-	-	-	8.9	2.9	88	224	15	MOLECULE: CELLULAR TUMOR ANTIGEN P53;	-	-	-	-	-	-	-	-	-	-	-	-	-	IPR014722;IPR001357;IPR015125	Y	TP53BP1	9606 [Organism: human] [Scientific Name: Homo sapiens]	Y	7	1GZH-D02	12	45.87	57.39	0.4252	0.532	0.6877	2.33	87	88
1KZY	D	Q12888	-	-	-	-	-	-	-	-	-	-	-	-	8.5	2.9	88	232	15	MOLECULE: CELLULAR TUMOR ANTIGEN P53;	-	-	-	-	-	-	-	-	-	-	-	-	-	IPR014722;IPR001357;IPR015125	Y	TP53BP1	9606 [Organism: human] [Scientific Name: Homo sapiens]	Y	1	-	-	-	-	-	-	-	-	-	-
1KZY	D	Q12888	-	-	-	-	-	-	-	-	-	-	-	-	8.5	2.9	88	232	15	MOLECULE: CELLULAR TUMOR ANTIGEN P53;	-	-	-	-	-	-	-	-	-	-	-	-	-	IPR014722;IPR001357;IPR015125	Y	TP53BP1	9606 [Organism: human] [Scientific Name: Homo sapiens]	Y	7	1GZH-D02	-	-	-	-	-	-	-	-	-
1KZY	D	Q12888	-	-	-	-	-	-	-	-	-	-	-	-	8.5	2.9	88	232	15	MOLECULE: CELLULAR TUMOR ANTIGEN P53;	-	-	-	-	-	-	-	-	-	-	-	-	-	IPR014722;IPR001357;IPR015125	Y	TP53BP1	9606 [Organism: human] [Scientific Name: Homo sapiens]	Y	1	-	-	-	-	-	-	-	-	-	-
1KZY	D	Q12888	-	-	-	-	-	-	-	-	-	-	-	-	8.5	2.9	88	232	15	MOLECULE: CELLULAR TUMOR ANTIGEN P53;	-	-	-	-	-	-	-	-	-	-	-	-	-	IPR014722;IPR001357;IPR015125	Y	TP53BP1	9606 [Organism: human] [Scientific Name: Homo sapiens]	Y	7	1GZH-D02	-	-	-	-	-	-	-	-	-
1KZY	D	Q12888	-	-	-	-	-	-	-	-	-	-	-	-	8.5	2.9	88	232	15	MOLECULE: CELLULAR TUMOR ANTIGEN P53;	-	-	-	-	-	-	-	-	-	-	-	-	-	IPR014722;IPR001357;IPR015125	Y	TP53BP1	9606 [Organism: human] [Scientific Name: Homo sapiens]	Y	1	-	-	-	-	-	-	-	-	-	-
1KZY	D	Q12888	-	-	-	-	-	-	-	-	-	-	-	-	8.5	2.9	88	232	15	MOLECULE: CELLULAR TUMOR ANTIGEN P53;	-	-	-	-	-	-	-	-	-	-	-	-	-	IPR014722;IPR001357;IPR015125	Y	TP53BP1	9606 [Organism: human] [Scientific Name: Homo sapiens]	Y	7	1GZH-D02	-	-	-	-	-	-	-	-	-
1KZY	D	Q12888	-	-	-	-	-	-	-	-	-	-	-	-	8.5	2.9	88	232	15	MOLECULE: CELLULAR TUMOR ANTIGEN P53;	-	-	-	-	-	-	-	-	-	-	-	-	-	IPR014722;IPR001357;IPR015125	Y	TP53BP1	9606 [Organism: human] [Scientific Name: Homo sapiens]	Y	1	-	-	-	-	-	-	-	-	-	-
1KZY	D	Q12888	-	-	-	-	-	-	-	-	-	-	-	-	8.5	2.9	88	232	15	MOLECULE: CELLULAR TUMOR ANTIGEN P53;	-	-	-	-	-	-	-	-	-	-	-	-	-	IPR014722;IPR001357;IPR015125	Y	TP53BP1	9606 [Organism: human] [Scientific Name: Homo sapiens]	Y	7	1GZH-D02	-	-	-	-	-	-	-	-	-
1KZY	D	Q12888	-	-	-	-	-	-	-	-	-	-	-	-	8.5	2.9	88	232	15	MOLECULE: CELLULAR TUMOR ANTIGEN P53;	-	-	-	-	-	-	-	-	-	-	-	-	-	IPR014722;IPR001357;IPR015125	Y	TP53BP1	9606 [Organism: human] [Scientific Name: Homo sapiens]	Y	1	-	-	-	-	-	-	-	-	-	-
1KZY	D	Q12888	-	-	-	-	-	-	-	-	-	-	-	-	8.5	2.9	88	232	15	MOLECULE: CELLULAR TUMOR ANTIGEN P53;	-	-	-	-	-	-	-	-	-	-	-	-	-	IPR014722;IPR001357;IPR015125	Y	TP53BP1	9606 [Organism: human] [Scientific Name: Homo sapiens]	Y	7	1GZH-D02	-	-	-	-	-	-	-	-	-
1KZY	D	Q12888	-	-	-	-	-	-	-	-	-	-	-	-	8.5	2.9	88	232	15	MOLECULE: CELLULAR TUMOR ANTIGEN P53;	-	-	-	-	-	-	-	-	-	-	-	-	-	IPR014722;IPR001357;IPR015125	Y	TP53BP1	9606 [Organism: human] [Scientific Name: Homo sapiens]	Y	1	-	-	-	-	-	-	-	-	-	-
1KZY	D	Q12888	-	-	-	-	-	-	-	-	-	-	-	-	8.5	2.9	88	232	15	MOLECULE: CELLULAR TUMOR ANTIGEN P53;	-	-	-	-	-	-	-	-	-	-	-	-	-	IPR014722;IPR001357;IPR015125	Y	TP53BP1	9606 [Organism: human] [Scientific Name: Homo sapiens]	Y	7	1GZH-D02	-	-	-	-	-	-	-	-	-
1KZY	C	Q12888	-	-	-	-	-	-	-	-	-	-	-	-	8.3	3	89	232	16	MOLECULE: CELLULAR TUMOR ANTIGEN P53;	-	-	-	-	-	-	-	-	-	-	-	-	-	IPR014722;IPR001357;IPR015125	Y	TP53BP1	9606 [Organism: human] [Scientific Name: Homo sapiens]	Y	1	-	-	-	-	-	-	-	-	-	-
1KZY	C	Q12888	-	-	-	-	-	-	-	-	-	-	-	-	8.3	3	89	232	16	MOLECULE: CELLULAR TUMOR ANTIGEN P53;	-	-	-	-	-	-	-	-	-	-	-	-	-	IPR014722;IPR001357;IPR015125	Y	TP53BP1	9606 [Organism: human] [Scientific Name: Homo sapiens]	Y	7	1GZH-D02	-	-	-	-	-	-	-	-	-
1KZY	C	Q12888	-	-	-	-	-	-	-	-	-	-	-	-	8.3	3	89	232	16	MOLECULE: CELLULAR TUMOR ANTIGEN P53;	-	-	-	-	-	-	-	-	-	-	-	-	-	IPR014722;IPR001357;IPR015125	Y	TP53BP1	9606 [Organism: human] [Scientific Name: Homo sapiens]	Y	1	-	-	-	-	-	-	-	-	-	-
1KZY	C	Q12888	-	-	-	-	-	-	-	-	-	-	-	-	8.3	3	89	232	16	MOLECULE: CELLULAR TUMOR ANTIGEN P53;	-	-	-	-	-	-	-	-	-	-	-	-	-	IPR014722;IPR001357;IPR015125	Y	TP53BP1	9606 [Organism: human] [Scientific Name: Homo sapiens]	Y	7	1GZH-D02	-	-	-	-	-	-	-	-	-
1KZY	C	Q12888	-	-	-	-	-	-	-	-	-	-	-	-	8.3	3	89	232	16	MOLECULE: CELLULAR TUMOR ANTIGEN P53;	-	-	-	-	-	-	-	-	-	-	-	-	-	IPR014722;IPR001357;IPR015125	Y	TP53BP1	9606 [Organism: human] [Scientific Name: Homo sapiens]	Y	1	-	-	-	-	-	-	-	-	-	-
1KZY	C	Q12888	-	-	-	-	-	-	-	-	-	-	-	-	8.3	3	89	232	16	MOLECULE: CELLULAR TUMOR ANTIGEN P53;	-	-	-	-	-	-	-	-	-	-	-	-	-	IPR014722;IPR001357;IPR015125	Y	TP53BP1	9606 [Organism: human] [Scientific Name: Homo sapiens]	Y	7	1GZH-D02	-	-	-	-	-	-	-	-	-
1KZY	C	Q12888	-	-	-	-	-	-	-	-	-	-	-	-	8.3	3	89	232	16	MOLECULE: CELLULAR TUMOR ANTIGEN P53;	-	-	-	-	-	-	-	-	-	-	-	-	-	IPR014722;IPR001357;IPR015125	Y	TP53BP1	9606 [Organism: human] [Scientific Name: Homo sapiens]	Y	1	-	-	-	-	-	-	-	-	-	-
1KZY	C	Q12888	-	-	-	-	-	-	-	-	-	-	-	-	8.3	3	89	232	16	MOLECULE: CELLULAR TUMOR ANTIGEN P53;	-	-	-	-	-	-	-	-	-	-	-	-	-	IPR014722;IPR001357;IPR015125	Y	TP53BP1	9606 [Organism: human] [Scientific Name: Homo sapiens]	Y	7	1GZH-D02	-	-	-	-	-	-	-	-	-
1KZY	C	Q12888	-	-	-	-	-	-	-	-	-	-	-	-	8.3	3	89	232	16	MOLECULE: CELLULAR TUMOR ANTIGEN P53;	-	-	-	-	-	-	-	-	-	-	-	-	-	IPR014722;IPR001357;IPR015125	Y	TP53BP1	9606 [Organism: human] [Scientific Name: Homo sapiens]	Y	1	-	-	-	-	-	-	-	-	-	-
1KZY	C	Q12888	-	-	-	-	-	-	-	-	-	-	-	-	8.3	3	89	232	16	MOLECULE: CELLULAR TUMOR ANTIGEN P53;	-	-	-	-	-	-	-	-	-	-	-	-	-	IPR014722;IPR001357;IPR015125	Y	TP53BP1	9606 [Organism: human] [Scientific Name: Homo sapiens]	Y	7	1GZH-D02	-	-	-	-	-	-	-	-	-
1KZY	C	Q12888	-	-	-	-	-	-	-	-	-	-	-	-	8.3	3	89	232	16	MOLECULE: CELLULAR TUMOR ANTIGEN P53;	-	-	-	-	-	-	-	-	-	-	-	-	-	IPR014722;IPR001357;IPR015125	Y	TP53BP1	9606 [Organism: human] [Scientific Name: Homo sapiens]	Y	1	-	-	-	-	-	-	-	-	-	-
1KZY	C	Q12888	-	-	-	-	-	-	-	-	-	-	-	-	8.3	3	89	232	16	MOLECULE: CELLULAR TUMOR ANTIGEN P53;	-	-	-	-	-	-	-	-	-	-	-	-	-	IPR014722;IPR001357;IPR015125	Y	TP53BP1	9606 [Organism: human] [Scientific Name: Homo sapiens]	Y	7	1GZH-D02	-	-	-	-	-	-	-	-	-
1KZY	C	Q12888	-	-	-	-	-	-	-	-	-	-	-	-	8.3	3	89	232	16	MOLECULE: CELLULAR TUMOR ANTIGEN P53;	-	-	-	-	-	-	-	-	-	-	-	-	-	IPR014722;IPR001357;IPR015125	Y	TP53BP1	9606 [Organism: human] [Scientific Name: Homo sapiens]	Y	1	-	-	-	-	-	-	-	-	-	-
1KZY	C	Q12888	-	-	-	-	-	-	-	-	-	-	-	-	8.3	3	89	232	16	MOLECULE: CELLULAR TUMOR ANTIGEN P53;	-	-	-	-	-	-	-	-	-	-	-	-	-	IPR014722;IPR001357;IPR015125	Y	TP53BP1	9606 [Organism: human] [Scientific Name: Homo sapiens]	Y	7	1GZH-D02	-	-	-	-	-	-	-	-	-
1KZY	C	Q12888	-	-	-	-	-	-	-	-	-	-	-	-	8.3	3	89	232	16	MOLECULE: CELLULAR TUMOR ANTIGEN P53;	-	-	-	-	-	-	-	-	-	-	-	-	-	IPR014722;IPR001357;IPR015125	Y	TP53BP1	9606 [Organism: human] [Scientific Name: Homo sapiens]	Y	1	-	-	-	-	-	-	-	-	-	-
1KZY	C	Q12888	-	-	-	-	-	-	-	-	-	-	-	-	8.3	3	89	232	16	MOLECULE: CELLULAR TUMOR ANTIGEN P53;	-	-	-	-	-	-	-	-	-	-	-	-	-	IPR014722;IPR001357;IPR015125	Y	TP53BP1	9606 [Organism: human] [Scientific Name: Homo sapiens]	Y	7	1GZH-D02	-	-	-	-	-	-	-	-	-
1KZY	C	Q12888	-	-	-	-	-	-	-	-	-	-	-	-	8.3	3	89	232	16	MOLECULE: CELLULAR TUMOR ANTIGEN P53;	-	-	-	-	-	-	-	-	-	-	-	-	-	IPR014722;IPR001357;IPR015125	Y	TP53BP1	9606 [Organism: human] [Scientific Name: Homo sapiens]	Y	1	-	-	-	-	-	-	-	-	-	-
1KZY	C	Q12888	-	-	-	-	-	-	-	-	-	-	-	-	8.3	3	89	232	16	MOLECULE: CELLULAR TUMOR ANTIGEN P53;	-	-	-	-	-	-	-	-	-	-	-	-	-	IPR014722;IPR001357;IPR015125	Y	TP53BP1	9606 [Organism: human] [Scientific Name: Homo sapiens]	Y	7	1GZH-D02	-	-	-	-	-	-	-	-	-
1KZY	C	Q12888	-	-	-	-	-	-	-	-	-	-	-	-	8.3	3	89	232	16	MOLECULE: CELLULAR TUMOR ANTIGEN P53;	-	-	-	-	-	-	-	-	-	-	-	-	-	IPR014722;IPR001357;IPR015125	Y	TP53BP1	9606 [Organism: human] [Scientific Name: Homo sapiens]	Y	1	-	-	-	-	-	-	-	-	-	-
1KZY	C	Q12888	-	-	-	-	-	-	-	-	-	-	-	-	8.3	3	89	232	16	MOLECULE: CELLULAR TUMOR ANTIGEN P53;	-	-	-	-	-	-	-	-	-	-	-	-	-	IPR014722;IPR001357;IPR015125	Y	TP53BP1	9606 [Organism: human] [Scientific Name: Homo sapiens]	Y	7	1GZH-D02	-	-	-	-	-	-	-	-	-
1KZY	C	Q12888	-	-	-	-	-	-	-	-	-	-	-	-	8.3	3	89	232	16	MOLECULE: CELLULAR TUMOR ANTIGEN P53;	-	-	-	-	-	-	-	-	-	-	-	-	-	IPR014722;IPR001357;IPR015125	Y	TP53BP1	9606 [Organism: human] [Scientific Name: Homo sapiens]	Y	1	-	-	-	-	-	-	-	-	-	-
1KZY	C	Q12888	-	-	-	-	-	-	-	-	-	-	-	-	8.3	3	89	232	16	MOLECULE: CELLULAR TUMOR ANTIGEN P53;	-	-	-	-	-	-	-	-	-	-	-	-	-	IPR014722;IPR001357;IPR015125	Y	TP53BP1	9606 [Organism: human] [Scientific Name: Homo sapiens]	Y	7	1GZH-D02	-	-	-	-	-	-	-	-	-
1KZY	C	Q12888	-	-	-	-	-	-	-	-	-	-	-	-	8.3	3	89	232	16	MOLECULE: CELLULAR TUMOR ANTIGEN P53;	-	-	-	-	-	-	-	-	-	-	-	-	-	IPR014722;IPR001357;IPR015125	Y	TP53BP1	9606 [Organism: human] [Scientific Name: Homo sapiens]	Y	1	-	-	-	-	-	-	-	-	-	-
1KZY	C	Q12888	-	-	-	-	-	-	-	-	-	-	-	-	8.3	3	89	232	16	MOLECULE: CELLULAR TUMOR ANTIGEN P53;	-	-	-	-	-	-	-	-	-	-	-	-	-	IPR014722;IPR001357;IPR015125	Y	TP53BP1	9606 [Organism: human] [Scientific Name: Homo sapiens]	Y	7	1GZH-D02	-	-	-	-	-	-	-	-	-
1CDZ	A	P18887	-	-	-	-	-	-	-	-	-	-	-	-	9	2.4	85	96	11	MOLECULE: PROTEIN (DNA-REPAIR PROTEIN XRCC1);	-	-	-	-	-	-	-	-	-	-	-	-	-	IPR008979;IPR001357;IPR002706	Y	XRCC1	9606 [Organism: human] [Scientific Name: Homo sapiens]	Y	16	1CDZ-A	-	-	-	-	-	-	-	-	-
1CDZ	A	P18887	-	-	-	-	-	-	-	-	-	-	-	-	9	2.4	85	96	11	MOLECULE: PROTEIN (DNA-REPAIR PROTEIN XRCC1);	-	-	-	-	-	-	-	-	-	-	-	-	-	IPR008979;IPR001357;IPR002706	Y	XRCC1	9606 [Organism: human] [Scientific Name: Homo sapiens]	Y	22	2D8M-A01	-	-	-	-	-	-	-	-	-
1CDZ	A	P18887	-	-	-	-	-	-	-	-	-	-	-	-	9	2.4	85	96	11	MOLECULE: PROTEIN (DNA-REPAIR PROTEIN XRCC1);	-	-	-	-	-	-	-	-	-	-	-	-	-	IPR008979;IPR001357;IPR002706	Y	XRCC1	9606 [Organism: human] [Scientific Name: Homo sapiens]	Y	16	1CDZ-A	-	-	-	-	-	-	-	-	-
1CDZ	A	P18887	-	-	-	-	-	-	-	-	-	-	-	-	9	2.4	85	96	11	MOLECULE: PROTEIN (DNA-REPAIR PROTEIN XRCC1);	-	-	-	-	-	-	-	-	-	-	-	-	-	IPR008979;IPR001357;IPR002706	Y	XRCC1	9606 [Organism: human] [Scientific Name: Homo sapiens]	Y	16	1CDZ-A	-	-	-	-	-	-	-	-	-
1CDZ	A	P18887	-	-	-	-	-	-	-	-	-	-	-	-	9	2.4	85	96	11	MOLECULE: PROTEIN (DNA-REPAIR PROTEIN XRCC1);	-	-	-	-	-	-	-	-	-	-	-	-	-	IPR008979;IPR001357;IPR002706	Y	XRCC1	9606 [Organism: human] [Scientific Name: Homo sapiens]	Y	16	1CDZ-A	-	-	-	-	-	-	-	-	-
1CDZ	A	P18887	-	-	-	-	-	-	-	-	-	-	-	-	9	2.4	85	96	11	MOLECULE: PROTEIN (DNA-REPAIR PROTEIN XRCC1);	-	-	-	-	-	-	-	-	-	-	-	-	-	IPR008979;IPR001357;IPR002706	Y	XRCC1	9606 [Organism: human] [Scientific Name: Homo sapiens]	Y	16	1CDZ-A	-	-	-	-	-	-	-	-	-
1CDZ	A	P18887	-	-	-	-	-	-	-	-	-	-	-	-	9	2.4	85	96	11	MOLECULE: PROTEIN (DNA-REPAIR PROTEIN XRCC1);	-	-	-	-	-	-	-	-	-	-	-	-	-	IPR008979;IPR001357;IPR002706	Y	XRCC1	9606 [Organism: human] [Scientific Name: Homo sapiens]	Y	16	1CDZ-A	-	-	-	-	-	-	-	-	-
1CDZ	A	P18887	-	-	-	-	-	-	-	-	-	-	-	-	9	2.4	85	96	11	MOLECULE: PROTEIN (DNA-REPAIR PROTEIN XRCC1);	-	-	-	-	-	-	-	-	-	-	-	-	-	IPR008979;IPR001357;IPR002706	Y	XRCC1	9606 [Organism: human] [Scientific Name: Homo sapiens]	Y	16	1CDZ-A	-	-	-	-	-	-	-	-	-
2JW5	A	Q9UGP5	-	-	-	-	-	-	-	-	-	-	-	-	6.4	2.9	86	106	13	MOLECULE: DNA POLYMERASE LAMBDA;	-	-	-	-	-	-	-	-	-	-	-	-	-	IPR010996;IPR002054;IPR019843;IPR028207;IPR002008;IPR027421;IPR022312;IPR003583;IPR001357;IPR018944	Y	POLL	9606 [Organism: human] [Scientific Name: Homo sapiens]	Y	8	2JW5-A00	27	42.44	47.81	0.3877	0.4368	0.6337	3.03	92	87
2JW5	A	Q9UGP5	-	-	-	-	-	-	-	-	-	-	-	-	6.4	2.9	86	106	13	MOLECULE: DNA POLYMERASE LAMBDA;	-	-	-	-	-	-	-	-	-	-	-	-	-	IPR010996;IPR002054;IPR019843;IPR028207;IPR002008;IPR027421;IPR022312;IPR003583;IPR001357;IPR018944	Y	POLL	9606 [Organism: human] [Scientific Name: Homo sapiens]	Y	8	2JW5-A00	27	42.44	47.81	0.3877	0.4368	0.6337	3.03	92	87
3SHT	C	Q8NEM0	-	-	-	-	-	-	-	-	-	-	-	-	8.8	2.6	89	186	13	MOLECULE: MICROCEPHALIN;	-	-	-	-	-	-	-	-	-	-	-	-	-	IPR001357;IPR022047	Y	MCPH1	9606 [Organism: human] [Scientific Name: Homo sapiens]	Y	18	2WT8-B	-	-	-	-	-	-	-	-	-
3SHT	C	Q8NEM0	-	-	-	-	-	-	-	-	-	-	-	-	8.8	2.6	89	186	13	MOLECULE: MICROCEPHALIN;	-	-	-	-	-	-	-	-	-	-	-	-	-	IPR001357;IPR022047	Y	MCPH1	9606 [Organism: human] [Scientific Name: Homo sapiens]	Y	18	2WT8-B	-	-	-	-	-	-	-	-	-
3SHT	C	Q8NEM0	-	-	-	-	-	-	-	-	-	-	-	-	8.8	2.6	89	186	13	MOLECULE: MICROCEPHALIN;	-	-	-	-	-	-	-	-	-	-	-	-	-	IPR001357;IPR022047	Y	MCPH1	9606 [Organism: human] [Scientific Name: Homo sapiens]	Y	18	2WT8-B	-	-	-	-	-	-	-	-	-
3SHT	C	Q8NEM0	-	-	-	-	-	-	-	-	-	-	-	-	8.8	2.6	89	186	13	MOLECULE: MICROCEPHALIN;	-	-	-	-	-	-	-	-	-	-	-	-	-	IPR001357;IPR022047	Y	MCPH1	9606 [Organism: human] [Scientific Name: Homo sapiens]	Y	18	2WT8-B	-	-	-	-	-	-	-	-	-
3SHT	C	Q8NEM0	-	-	-	-	-	-	-	-	-	-	-	-	8.8	2.6	89	186	13	MOLECULE: MICROCEPHALIN;	-	-	-	-	-	-	-	-	-	-	-	-	-	IPR001357;IPR022047	Y	MCPH1	9606 [Organism: human] [Scientific Name: Homo sapiens]	Y	18	2WT8-B	-	-	-	-	-	-	-	-	-
3SHT	C	Q8NEM0	-	-	-	-	-	-	-	-	-	-	-	-	8.8	2.6	89	186	13	MOLECULE: MICROCEPHALIN;	-	-	-	-	-	-	-	-	-	-	-	-	-	IPR001357;IPR022047	Y	MCPH1	9606 [Organism: human] [Scientific Name: Homo sapiens]	Y	18	2WT8-B	-	-	-	-	-	-	-	-	-
3SHT	C	Q8NEM0	-	-	-	-	-	-	-	-	-	-	-	-	8.8	2.6	89	186	13	MOLECULE: MICROCEPHALIN;	-	-	-	-	-	-	-	-	-	-	-	-	-	IPR001357;IPR022047	Y	MCPH1	9606 [Organism: human] [Scientific Name: Homo sapiens]	Y	18	2WT8-B	-	-	-	-	-	-	-	-	-
3SHT	C	Q8NEM0	-	-	-	-	-	-	-	-	-	-	-	-	8.8	2.6	89	186	13	MOLECULE: MICROCEPHALIN;	-	-	-	-	-	-	-	-	-	-	-	-	-	IPR001357;IPR022047	Y	MCPH1	9606 [Organism: human] [Scientific Name: Homo sapiens]	Y	18	2WT8-B	-	-	-	-	-	-	-	-	-
3SHT	C	Q8NEM0	-	-	-	-	-	-	-	-	-	-	-	-	8.8	2.6	89	186	13	MOLECULE: MICROCEPHALIN;	-	-	-	-	-	-	-	-	-	-	-	-	-	IPR001357;IPR022047	Y	MCPH1	9606 [Organism: human] [Scientific Name: Homo sapiens]	Y	18	2WT8-B	-	-	-	-	-	-	-	-	-
3SHT	C	Q8NEM0	-	-	-	-	-	-	-	-	-	-	-	-	8.8	2.6	89	186	13	MOLECULE: MICROCEPHALIN;	-	-	-	-	-	-	-	-	-	-	-	-	-	IPR001357;IPR022047	Y	MCPH1	9606 [Organism: human] [Scientific Name: Homo sapiens]	Y	18	2WT8-B	-	-	-	-	-	-	-	-	-
3SHT	C	Q8NEM0	-	-	-	-	-	-	-	-	-	-	-	-	8.8	2.6	89	186	13	MOLECULE: MICROCEPHALIN;	-	-	-	-	-	-	-	-	-	-	-	-	-	IPR001357;IPR022047	Y	MCPH1	9606 [Organism: human] [Scientific Name: Homo sapiens]	Y	18	2WT8-B	-	-	-	-	-	-	-	-	-
3SHT	C	Q8NEM0	-	-	-	-	-	-	-	-	-	-	-	-	8.8	2.6	89	186	13	MOLECULE: MICROCEPHALIN;	-	-	-	-	-	-	-	-	-	-	-	-	-	IPR001357;IPR022047	Y	MCPH1	9606 [Organism: human] [Scientific Name: Homo sapiens]	Y	18	2WT8-B	-	-	-	-	-	-	-	-	-
3SHT	C	Q8NEM0	-	-	-	-	-	-	-	-	-	-	-	-	8.8	2.6	89	186	13	MOLECULE: MICROCEPHALIN;	-	-	-	-	-	-	-	-	-	-	-	-	-	IPR001357;IPR022047	Y	MCPH1	9606 [Organism: human] [Scientific Name: Homo sapiens]	Y	18	2WT8-B	-	-	-	-	-	-	-	-	-
3SHT	C	Q8NEM0	-	-	-	-	-	-	-	-	-	-	-	-	8.8	2.6	89	186	13	MOLECULE: MICROCEPHALIN;	-	-	-	-	-	-	-	-	-	-	-	-	-	IPR001357;IPR022047	Y	MCPH1	9606 [Organism: human] [Scientific Name: Homo sapiens]	Y	18	2WT8-B	-	-	-	-	-	-	-	-	-
3SHT	C	Q8NEM0	-	-	-	-	-	-	-	-	-	-	-	-	8.8	2.6	89	186	13	MOLECULE: MICROCEPHALIN;	-	-	-	-	-	-	-	-	-	-	-	-	-	IPR001357;IPR022047	Y	MCPH1	9606 [Organism: human] [Scientific Name: Homo sapiens]	Y	18	2WT8-B	-	-	-	-	-	-	-	-	-
3SHT	C	Q8NEM0	-	-	-	-	-	-	-	-	-	-	-	-	8.8	2.6	89	186	13	MOLECULE: MICROCEPHALIN;	-	-	-	-	-	-	-	-	-	-	-	-	-	IPR001357;IPR022047	Y	MCPH1	9606 [Organism: human] [Scientific Name: Homo sapiens]	Y	18	2WT8-B	-	-	-	-	-	-	-	-	-
3SHT	C	Q8NEM0	-	-	-	-	-	-	-	-	-	-	-	-	8.8	2.6	89	186	13	MOLECULE: MICROCEPHALIN;	-	-	-	-	-	-	-	-	-	-	-	-	-	IPR001357;IPR022047	Y	MCPH1	9606 [Organism: human] [Scientific Name: Homo sapiens]	Y	18	2WT8-B	-	-	-	-	-	-	-	-	-
3SHT	C	Q8NEM0	-	-	-	-	-	-	-	-	-	-	-	-	8.8	2.6	89	186	13	MOLECULE: MICROCEPHALIN;	-	-	-	-	-	-	-	-	-	-	-	-	-	IPR001357;IPR022047	Y	MCPH1	9606 [Organism: human] [Scientific Name: Homo sapiens]	Y	18	2WT8-B	-	-	-	-	-	-	-	-	-
3SHT	C	Q8NEM0	-	-	-	-	-	-	-	-	-	-	-	-	8.8	2.6	89	186	13	MOLECULE: MICROCEPHALIN;	-	-	-	-	-	-	-	-	-	-	-	-	-	IPR001357;IPR022047	Y	MCPH1	9606 [Organism: human] [Scientific Name: Homo sapiens]	Y	18	2WT8-B	-	-	-	-	-	-	-	-	-
3SHT	C	Q8NEM0	-	-	-	-	-	-	-	-	-	-	-	-	8.8	2.6	89	186	13	MOLECULE: MICROCEPHALIN;	-	-	-	-	-	-	-	-	-	-	-	-	-	IPR001357;IPR022047	Y	MCPH1	9606 [Organism: human] [Scientific Name: Homo sapiens]	Y	18	2WT8-B	-	-	-	-	-	-	-	-	-
3SHT	C	Q8NEM0	-	-	-	-	-	-	-	-	-	-	-	-	8.8	2.6	89	186	13	MOLECULE: MICROCEPHALIN;	-	-	-	-	-	-	-	-	-	-	-	-	-	IPR001357;IPR022047	Y	MCPH1	9606 [Organism: human] [Scientific Name: Homo sapiens]	Y	18	2WT8-B	-	-	-	-	-	-	-	-	-
3SHT	C	Q8NEM0	-	-	-	-	-	-	-	-	-	-	-	-	8.8	2.6	89	186	13	MOLECULE: MICROCEPHALIN;	-	-	-	-	-	-	-	-	-	-	-	-	-	IPR001357;IPR022047	Y	MCPH1	9606 [Organism: human] [Scientific Name: Homo sapiens]	Y	18	2WT8-B	-	-	-	-	-	-	-	-	-
3SHT	C	Q8NEM0	-	-	-	-	-	-	-	-	-	-	-	-	8.8	2.6	89	186	13	MOLECULE: MICROCEPHALIN;	-	-	-	-	-	-	-	-	-	-	-	-	-	IPR001357;IPR022047	Y	MCPH1	9606 [Organism: human] [Scientific Name: Homo sapiens]	Y	18	2WT8-B	-	-	-	-	-	-	-	-	-
3SHT	C	Q8NEM0	-	-	-	-	-	-	-	-	-	-	-	-	8.8	2.6	89	186	13	MOLECULE: MICROCEPHALIN;	-	-	-	-	-	-	-	-	-	-	-	-	-	IPR001357;IPR022047	Y	MCPH1	9606 [Organism: human] [Scientific Name: Homo sapiens]	Y	18	2WT8-B	-	-	-	-	-	-	-	-	-
3SHT	C	Q8NEM0	-	-	-	-	-	-	-	-	-	-	-	-	8.8	2.6	89	186	13	MOLECULE: MICROCEPHALIN;	-	-	-	-	-	-	-	-	-	-	-	-	-	IPR001357;IPR022047	Y	MCPH1	9606 [Organism: human] [Scientific Name: Homo sapiens]	Y	18	2WT8-B	-	-	-	-	-	-	-	-	-
3SHT	C	Q8NEM0	-	-	-	-	-	-	-	-	-	-	-	-	8.8	2.6	89	186	13	MOLECULE: MICROCEPHALIN;	-	-	-	-	-	-	-	-	-	-	-	-	-	IPR001357;IPR022047	Y	MCPH1	9606 [Organism: human] [Scientific Name: Homo sapiens]	Y	18	2WT8-B	-	-	-	-	-	-	-	-	-
3SHT	C	Q8NEM0	-	-	-	-	-	-	-	-	-	-	-	-	8.8	2.6	89	186	13	MOLECULE: MICROCEPHALIN;	-	-	-	-	-	-	-	-	-	-	-	-	-	IPR001357;IPR022047	Y	MCPH1	9606 [Organism: human] [Scientific Name: Homo sapiens]	Y	18	2WT8-B	-	-	-	-	-	-	-	-	-
3SHT	C	Q8NEM0	-	-	-	-	-	-	-	-	-	-	-	-	8.8	2.6	89	186	13	MOLECULE: MICROCEPHALIN;	-	-	-	-	-	-	-	-	-	-	-	-	-	IPR001357;IPR022047	Y	MCPH1	9606 [Organism: human] [Scientific Name: Homo sapiens]	Y	18	2WT8-B	-	-	-	-	-	-	-	-	-
3SHT	C	Q8NEM0	-	-	-	-	-	-	-	-	-	-	-	-	8.8	2.6	89	186	13	MOLECULE: MICROCEPHALIN;	-	-	-	-	-	-	-	-	-	-	-	-	-	IPR001357;IPR022047	Y	MCPH1	9606 [Organism: human] [Scientific Name: Homo sapiens]	Y	18	2WT8-B	-	-	-	-	-	-	-	-	-
3SHT	C	Q8NEM0	-	-	-	-	-	-	-	-	-	-	-	-	8.8	2.6	89	186	13	MOLECULE: MICROCEPHALIN;	-	-	-	-	-	-	-	-	-	-	-	-	-	IPR001357;IPR022047	Y	MCPH1	9606 [Organism: human] [Scientific Name: Homo sapiens]	Y	18	2WT8-B	-	-	-	-	-	-	-	-	-
3SHT	C	Q8NEM0	-	-	-	-	-	-	-	-	-	-	-	-	8.8	2.6	89	186	13	MOLECULE: MICROCEPHALIN;	-	-	-	-	-	-	-	-	-	-	-	-	-	IPR001357;IPR022047	Y	MCPH1	9606 [Organism: human] [Scientific Name: Homo sapiens]	Y	14	3U3Z-A01	-	-	-	-	-	-	-	-	-
3SHT	C	Q8NEM0	-	-	-	-	-	-	-	-	-	-	-	-	8.8	2.6	89	186	13	MOLECULE: MICROCEPHALIN;	-	-	-	-	-	-	-	-	-	-	-	-	-	IPR001357;IPR022047	Y	MCPH1	9606 [Organism: human] [Scientific Name: Homo sapiens]	Y	27	3U3Z-A02	-	-	-	-	-	-	-	-	-
3SHT	B	Q8NEM0	-	-	-	-	-	-	-	-	-	-	-	-	8.7	2.6	89	187	13	MOLECULE: MICROCEPHALIN;	-	-	-	-	-	-	-	-	-	-	-	-	-	IPR001357;IPR022047	Y	MCPH1	9606 [Organism: human] [Scientific Name: Homo sapiens]	Y	18	2WT8-B	-	-	-	-	-	-	-	-	-
3SHT	B	Q8NEM0	-	-	-	-	-	-	-	-	-	-	-	-	8.7	2.6	89	187	13	MOLECULE: MICROCEPHALIN;	-	-	-	-	-	-	-	-	-	-	-	-	-	IPR001357;IPR022047	Y	MCPH1	9606 [Organism: human] [Scientific Name: Homo sapiens]	Y	18	2WT8-B	-	-	-	-	-	-	-	-	-
3SHT	B	Q8NEM0	-	-	-	-	-	-	-	-	-	-	-	-	8.7	2.6	89	187	13	MOLECULE: MICROCEPHALIN;	-	-	-	-	-	-	-	-	-	-	-	-	-	IPR001357;IPR022047	Y	MCPH1	9606 [Organism: human] [Scientific Name: Homo sapiens]	Y	18	2WT8-B	-	-	-	-	-	-	-	-	-
3SHT	B	Q8NEM0	-	-	-	-	-	-	-	-	-	-	-	-	8.7	2.6	89	187	13	MOLECULE: MICROCEPHALIN;	-	-	-	-	-	-	-	-	-	-	-	-	-	IPR001357;IPR022047	Y	MCPH1	9606 [Organism: human] [Scientific Name: Homo sapiens]	Y	18	2WT8-B	-	-	-	-	-	-	-	-	-
3SHT	B	Q8NEM0	-	-	-	-	-	-	-	-	-	-	-	-	8.7	2.6	89	187	13	MOLECULE: MICROCEPHALIN;	-	-	-	-	-	-	-	-	-	-	-	-	-	IPR001357;IPR022047	Y	MCPH1	9606 [Organism: human] [Scientific Name: Homo sapiens]	Y	18	2WT8-B	-	-	-	-	-	-	-	-	-
3SHT	B	Q8NEM0	-	-	-	-	-	-	-	-	-	-	-	-	8.7	2.6	89	187	13	MOLECULE: MICROCEPHALIN;	-	-	-	-	-	-	-	-	-	-	-	-	-	IPR001357;IPR022047	Y	MCPH1	9606 [Organism: human] [Scientific Name: Homo sapiens]	Y	18	2WT8-B	-	-	-	-	-	-	-	-	-
3SHT	B	Q8NEM0	-	-	-	-	-	-	-	-	-	-	-	-	8.7	2.6	89	187	13	MOLECULE: MICROCEPHALIN;	-	-	-	-	-	-	-	-	-	-	-	-	-	IPR001357;IPR022047	Y	MCPH1	9606 [Organism: human] [Scientific Name: Homo sapiens]	Y	18	2WT8-B	-	-	-	-	-	-	-	-	-
3SHT	B	Q8NEM0	-	-	-	-	-	-	-	-	-	-	-	-	8.7	2.6	89	187	13	MOLECULE: MICROCEPHALIN;	-	-	-	-	-	-	-	-	-	-	-	-	-	IPR001357;IPR022047	Y	MCPH1	9606 [Organism: human] [Scientific Name: Homo sapiens]	Y	18	2WT8-B	-	-	-	-	-	-	-	-	-
3SHT	B	Q8NEM0	-	-	-	-	-	-	-	-	-	-	-	-	8.7	2.6	89	187	13	MOLECULE: MICROCEPHALIN;	-	-	-	-	-	-	-	-	-	-	-	-	-	IPR001357;IPR022047	Y	MCPH1	9606 [Organism: human] [Scientific Name: Homo sapiens]	Y	18	2WT8-B	-	-	-	-	-	-	-	-	-
3SHT	B	Q8NEM0	-	-	-	-	-	-	-	-	-	-	-	-	8.7	2.6	89	187	13	MOLECULE: MICROCEPHALIN;	-	-	-	-	-	-	-	-	-	-	-	-	-	IPR001357;IPR022047	Y	MCPH1	9606 [Organism: human] [Scientific Name: Homo sapiens]	Y	18	2WT8-B	-	-	-	-	-	-	-	-	-
3SHT	B	Q8NEM0	-	-	-	-	-	-	-	-	-	-	-	-	8.7	2.6	89	187	13	MOLECULE: MICROCEPHALIN;	-	-	-	-	-	-	-	-	-	-	-	-	-	IPR001357;IPR022047	Y	MCPH1	9606 [Organism: human] [Scientific Name: Homo sapiens]	Y	18	2WT8-B	-	-	-	-	-	-	-	-	-
3SHT	B	Q8NEM0	-	-	-	-	-	-	-	-	-	-	-	-	8.7	2.6	89	187	13	MOLECULE: MICROCEPHALIN;	-	-	-	-	-	-	-	-	-	-	-	-	-	IPR001357;IPR022047	Y	MCPH1	9606 [Organism: human] [Scientific Name: Homo sapiens]	Y	18	2WT8-B	-	-	-	-	-	-	-	-	-
3SHT	B	Q8NEM0	-	-	-	-	-	-	-	-	-	-	-	-	8.7	2.6	89	187	13	MOLECULE: MICROCEPHALIN;	-	-	-	-	-	-	-	-	-	-	-	-	-	IPR001357;IPR022047	Y	MCPH1	9606 [Organism: human] [Scientific Name: Homo sapiens]	Y	18	2WT8-B	-	-	-	-	-	-	-	-	-
3SHT	B	Q8NEM0	-	-	-	-	-	-	-	-	-	-	-	-	8.7	2.6	89	187	13	MOLECULE: MICROCEPHALIN;	-	-	-	-	-	-	-	-	-	-	-	-	-	IPR001357;IPR022047	Y	MCPH1	9606 [Organism: human] [Scientific Name: Homo sapiens]	Y	18	2WT8-B	-	-	-	-	-	-	-	-	-
3SHT	B	Q8NEM0	-	-	-	-	-	-	-	-	-	-	-	-	8.7	2.6	89	187	13	MOLECULE: MICROCEPHALIN;	-	-	-	-	-	-	-	-	-	-	-	-	-	IPR001357;IPR022047	Y	MCPH1	9606 [Organism: human] [Scientific Name: Homo sapiens]	Y	18	2WT8-B	-	-	-	-	-	-	-	-	-
3SHT	B	Q8NEM0	-	-	-	-	-	-	-	-	-	-	-	-	8.7	2.6	89	187	13	MOLECULE: MICROCEPHALIN;	-	-	-	-	-	-	-	-	-	-	-	-	-	IPR001357;IPR022047	Y	MCPH1	9606 [Organism: human] [Scientific Name: Homo sapiens]	Y	18	2WT8-B	-	-	-	-	-	-	-	-	-
3SHT	B	Q8NEM0	-	-	-	-	-	-	-	-	-	-	-	-	8.7	2.6	89	187	13	MOLECULE: MICROCEPHALIN;	-	-	-	-	-	-	-	-	-	-	-	-	-	IPR001357;IPR022047	Y	MCPH1	9606 [Organism: human] [Scientific Name: Homo sapiens]	Y	18	2WT8-B	-	-	-	-	-	-	-	-	-
3SHT	B	Q8NEM0	-	-	-	-	-	-	-	-	-	-	-	-	8.7	2.6	89	187	13	MOLECULE: MICROCEPHALIN;	-	-	-	-	-	-	-	-	-	-	-	-	-	IPR001357;IPR022047	Y	MCPH1	9606 [Organism: human] [Scientific Name: Homo sapiens]	Y	18	2WT8-B	-	-	-	-	-	-	-	-	-
3SHT	B	Q8NEM0	-	-	-	-	-	-	-	-	-	-	-	-	8.7	2.6	89	187	13	MOLECULE: MICROCEPHALIN;	-	-	-	-	-	-	-	-	-	-	-	-	-	IPR001357;IPR022047	Y	MCPH1	9606 [Organism: human] [Scientific Name: Homo sapiens]	Y	18	2WT8-B	-	-	-	-	-	-	-	-	-
3SHT	B	Q8NEM0	-	-	-	-	-	-	-	-	-	-	-	-	8.7	2.6	89	187	13	MOLECULE: MICROCEPHALIN;	-	-	-	-	-	-	-	-	-	-	-	-	-	IPR001357;IPR022047	Y	MCPH1	9606 [Organism: human] [Scientific Name: Homo sapiens]	Y	18	2WT8-B	-	-	-	-	-	-	-	-	-
3SHT	B	Q8NEM0	-	-	-	-	-	-	-	-	-	-	-	-	8.7	2.6	89	187	13	MOLECULE: MICROCEPHALIN;	-	-	-	-	-	-	-	-	-	-	-	-	-	IPR001357;IPR022047	Y	MCPH1	9606 [Organism: human] [Scientific Name: Homo sapiens]	Y	18	2WT8-B	-	-	-	-	-	-	-	-	-
3SHT	B	Q8NEM0	-	-	-	-	-	-	-	-	-	-	-	-	8.7	2.6	89	187	13	MOLECULE: MICROCEPHALIN;	-	-	-	-	-	-	-	-	-	-	-	-	-	IPR001357;IPR022047	Y	MCPH1	9606 [Organism: human] [Scientific Name: Homo sapiens]	Y	18	2WT8-B	-	-	-	-	-	-	-	-	-
3SHT	B	Q8NEM0	-	-	-	-	-	-	-	-	-	-	-	-	8.7	2.6	89	187	13	MOLECULE: MICROCEPHALIN;	-	-	-	-	-	-	-	-	-	-	-	-	-	IPR001357;IPR022047	Y	MCPH1	9606 [Organism: human] [Scientific Name: Homo sapiens]	Y	18	2WT8-B	-	-	-	-	-	-	-	-	-
3SHT	B	Q8NEM0	-	-	-	-	-	-	-	-	-	-	-	-	8.7	2.6	89	187	13	MOLECULE: MICROCEPHALIN;	-	-	-	-	-	-	-	-	-	-	-	-	-	IPR001357;IPR022047	Y	MCPH1	9606 [Organism: human] [Scientific Name: Homo sapiens]	Y	18	2WT8-B	-	-	-	-	-	-	-	-	-
3SHT	B	Q8NEM0	-	-	-	-	-	-	-	-	-	-	-	-	8.7	2.6	89	187	13	MOLECULE: MICROCEPHALIN;	-	-	-	-	-	-	-	-	-	-	-	-	-	IPR001357;IPR022047	Y	MCPH1	9606 [Organism: human] [Scientific Name: Homo sapiens]	Y	18	2WT8-B	-	-	-	-	-	-	-	-	-
3SHT	B	Q8NEM0	-	-	-	-	-	-	-	-	-	-	-	-	8.7	2.6	89	187	13	MOLECULE: MICROCEPHALIN;	-	-	-	-	-	-	-	-	-	-	-	-	-	IPR001357;IPR022047	Y	MCPH1	9606 [Organism: human] [Scientific Name: Homo sapiens]	Y	18	2WT8-B	-	-	-	-	-	-	-	-	-
3SHT	B	Q8NEM0	-	-	-	-	-	-	-	-	-	-	-	-	8.7	2.6	89	187	13	MOLECULE: MICROCEPHALIN;	-	-	-	-	-	-	-	-	-	-	-	-	-	IPR001357;IPR022047	Y	MCPH1	9606 [Organism: human] [Scientific Name: Homo sapiens]	Y	18	2WT8-B	-	-	-	-	-	-	-	-	-
3SHT	B	Q8NEM0	-	-	-	-	-	-	-	-	-	-	-	-	8.7	2.6	89	187	13	MOLECULE: MICROCEPHALIN;	-	-	-	-	-	-	-	-	-	-	-	-	-	IPR001357;IPR022047	Y	MCPH1	9606 [Organism: human] [Scientific Name: Homo sapiens]	Y	18	2WT8-B	-	-	-	-	-	-	-	-	-
3SHT	B	Q8NEM0	-	-	-	-	-	-	-	-	-	-	-	-	8.7	2.6	89	187	13	MOLECULE: MICROCEPHALIN;	-	-	-	-	-	-	-	-	-	-	-	-	-	IPR001357;IPR022047	Y	MCPH1	9606 [Organism: human] [Scientific Name: Homo sapiens]	Y	18	2WT8-B	-	-	-	-	-	-	-	-	-
3SHT	B	Q8NEM0	-	-	-	-	-	-	-	-	-	-	-	-	8.7	2.6	89	187	13	MOLECULE: MICROCEPHALIN;	-	-	-	-	-	-	-	-	-	-	-	-	-	IPR001357;IPR022047	Y	MCPH1	9606 [Organism: human] [Scientific Name: Homo sapiens]	Y	18	2WT8-B	-	-	-	-	-	-	-	-	-
3SHT	B	Q8NEM0	-	-	-	-	-	-	-	-	-	-	-	-	8.7	2.6	89	187	13	MOLECULE: MICROCEPHALIN;	-	-	-	-	-	-	-	-	-	-	-	-	-	IPR001357;IPR022047	Y	MCPH1	9606 [Organism: human] [Scientific Name: Homo sapiens]	Y	14	3U3Z-A01	-	-	-	-	-	-	-	-	-
3SHT	B	Q8NEM0	-	-	-	-	-	-	-	-	-	-	-	-	8.7	2.6	89	187	13	MOLECULE: MICROCEPHALIN;	-	-	-	-	-	-	-	-	-	-	-	-	-	IPR001357;IPR022047	Y	MCPH1	9606 [Organism: human] [Scientific Name: Homo sapiens]	Y	27	3U3Z-A02	-	-	-	-	-	-	-	-	-
3SZM	C	Q8NEM0	-	-	-	-	-	-	-	-	-	-	-	-	8.7	2.4	79	191	18	MOLECULE: MICROCEPHALIN;	-	-	-	-	-	-	-	-	-	-	-	-	-	IPR001357;IPR022047	Y	MCPH1	9606 [Organism: human] [Scientific Name: Homo sapiens]	Y	18	2WT8-B	-	-	-	-	-	-	-	-	-
3SZM	C	Q8NEM0	-	-	-	-	-	-	-	-	-	-	-	-	8.7	2.4	79	191	18	MOLECULE: MICROCEPHALIN;	-	-	-	-	-	-	-	-	-	-	-	-	-	IPR001357;IPR022047	Y	MCPH1	9606 [Organism: human] [Scientific Name: Homo sapiens]	Y	18	2WT8-B	-	-	-	-	-	-	-	-	-
3SZM	C	Q8NEM0	-	-	-	-	-	-	-	-	-	-	-	-	8.7	2.4	79	191	18	MOLECULE: MICROCEPHALIN;	-	-	-	-	-	-	-	-	-	-	-	-	-	IPR001357;IPR022047	Y	MCPH1	9606 [Organism: human] [Scientific Name: Homo sapiens]	Y	18	2WT8-B	-	-	-	-	-	-	-	-	-
3SZM	C	Q8NEM0	-	-	-	-	-	-	-	-	-	-	-	-	8.7	2.4	79	191	18	MOLECULE: MICROCEPHALIN;	-	-	-	-	-	-	-	-	-	-	-	-	-	IPR001357;IPR022047	Y	MCPH1	9606 [Organism: human] [Scientific Name: Homo sapiens]	Y	18	2WT8-B	-	-	-	-	-	-	-	-	-
3SZM	C	Q8NEM0	-	-	-	-	-	-	-	-	-	-	-	-	8.7	2.4	79	191	18	MOLECULE: MICROCEPHALIN;	-	-	-	-	-	-	-	-	-	-	-	-	-	IPR001357;IPR022047	Y	MCPH1	9606 [Organism: human] [Scientific Name: Homo sapiens]	Y	18	2WT8-B	-	-	-	-	-	-	-	-	-
3SZM	C	Q8NEM0	-	-	-	-	-	-	-	-	-	-	-	-	8.7	2.4	79	191	18	MOLECULE: MICROCEPHALIN;	-	-	-	-	-	-	-	-	-	-	-	-	-	IPR001357;IPR022047	Y	MCPH1	9606 [Organism: human] [Scientific Name: Homo sapiens]	Y	18	2WT8-B	-	-	-	-	-	-	-	-	-
3SZM	C	Q8NEM0	-	-	-	-	-	-	-	-	-	-	-	-	8.7	2.4	79	191	18	MOLECULE: MICROCEPHALIN;	-	-	-	-	-	-	-	-	-	-	-	-	-	IPR001357;IPR022047	Y	MCPH1	9606 [Organism: human] [Scientific Name: Homo sapiens]	Y	18	2WT8-B	-	-	-	-	-	-	-	-	-
3SZM	C	Q8NEM0	-	-	-	-	-	-	-	-	-	-	-	-	8.7	2.4	79	191	18	MOLECULE: MICROCEPHALIN;	-	-	-	-	-	-	-	-	-	-	-	-	-	IPR001357;IPR022047	Y	MCPH1	9606 [Organism: human] [Scientific Name: Homo sapiens]	Y	18	2WT8-B	-	-	-	-	-	-	-	-	-
3SZM	C	Q8NEM0	-	-	-	-	-	-	-	-	-	-	-	-	8.7	2.4	79	191	18	MOLECULE: MICROCEPHALIN;	-	-	-	-	-	-	-	-	-	-	-	-	-	IPR001357;IPR022047	Y	MCPH1	9606 [Organism: human] [Scientific Name: Homo sapiens]	Y	18	2WT8-B	-	-	-	-	-	-	-	-	-
3SZM	C	Q8NEM0	-	-	-	-	-	-	-	-	-	-	-	-	8.7	2.4	79	191	18	MOLECULE: MICROCEPHALIN;	-	-	-	-	-	-	-	-	-	-	-	-	-	IPR001357;IPR022047	Y	MCPH1	9606 [Organism: human] [Scientific Name: Homo sapiens]	Y	18	2WT8-B	-	-	-	-	-	-	-	-	-
3SZM	C	Q8NEM0	-	-	-	-	-	-	-	-	-	-	-	-	8.7	2.4	79	191	18	MOLECULE: MICROCEPHALIN;	-	-	-	-	-	-	-	-	-	-	-	-	-	IPR001357;IPR022047	Y	MCPH1	9606 [Organism: human] [Scientific Name: Homo sapiens]	Y	18	2WT8-B	-	-	-	-	-	-	-	-	-
3SZM	C	Q8NEM0	-	-	-	-	-	-	-	-	-	-	-	-	8.7	2.4	79	191	18	MOLECULE: MICROCEPHALIN;	-	-	-	-	-	-	-	-	-	-	-	-	-	IPR001357;IPR022047	Y	MCPH1	9606 [Organism: human] [Scientific Name: Homo sapiens]	Y	18	2WT8-B	-	-	-	-	-	-	-	-	-
3SZM	C	Q8NEM0	-	-	-	-	-	-	-	-	-	-	-	-	8.7	2.4	79	191	18	MOLECULE: MICROCEPHALIN;	-	-	-	-	-	-	-	-	-	-	-	-	-	IPR001357;IPR022047	Y	MCPH1	9606 [Organism: human] [Scientific Name: Homo sapiens]	Y	18	2WT8-B	-	-	-	-	-	-	-	-	-
3SZM	C	Q8NEM0	-	-	-	-	-	-	-	-	-	-	-	-	8.7	2.4	79	191	18	MOLECULE: MICROCEPHALIN;	-	-	-	-	-	-	-	-	-	-	-	-	-	IPR001357;IPR022047	Y	MCPH1	9606 [Organism: human] [Scientific Name: Homo sapiens]	Y	18	2WT8-B	-	-	-	-	-	-	-	-	-
3SZM	C	Q8NEM0	-	-	-	-	-	-	-	-	-	-	-	-	8.7	2.4	79	191	18	MOLECULE: MICROCEPHALIN;	-	-	-	-	-	-	-	-	-	-	-	-	-	IPR001357;IPR022047	Y	MCPH1	9606 [Organism: human] [Scientific Name: Homo sapiens]	Y	18	2WT8-B	-	-	-	-	-	-	-	-	-
3SZM	C	Q8NEM0	-	-	-	-	-	-	-	-	-	-	-	-	8.7	2.4	79	191	18	MOLECULE: MICROCEPHALIN;	-	-	-	-	-	-	-	-	-	-	-	-	-	IPR001357;IPR022047	Y	MCPH1	9606 [Organism: human] [Scientific Name: Homo sapiens]	Y	18	2WT8-B	-	-	-	-	-	-	-	-	-
3SZM	C	Q8NEM0	-	-	-	-	-	-	-	-	-	-	-	-	8.7	2.4	79	191	18	MOLECULE: MICROCEPHALIN;	-	-	-	-	-	-	-	-	-	-	-	-	-	IPR001357;IPR022047	Y	MCPH1	9606 [Organism: human] [Scientific Name: Homo sapiens]	Y	18	2WT8-B	-	-	-	-	-	-	-	-	-
3SZM	C	Q8NEM0	-	-	-	-	-	-	-	-	-	-	-	-	8.7	2.4	79	191	18	MOLECULE: MICROCEPHALIN;	-	-	-	-	-	-	-	-	-	-	-	-	-	IPR001357;IPR022047	Y	MCPH1	9606 [Organism: human] [Scientific Name: Homo sapiens]	Y	18	2WT8-B	-	-	-	-	-	-	-	-	-
3SZM	C	Q8NEM0	-	-	-	-	-	-	-	-	-	-	-	-	8.7	2.4	79	191	18	MOLECULE: MICROCEPHALIN;	-	-	-	-	-	-	-	-	-	-	-	-	-	IPR001357;IPR022047	Y	MCPH1	9606 [Organism: human] [Scientific Name: Homo sapiens]	Y	18	2WT8-B	-	-	-	-	-	-	-	-	-
3SZM	C	Q8NEM0	-	-	-	-	-	-	-	-	-	-	-	-	8.7	2.4	79	191	18	MOLECULE: MICROCEPHALIN;	-	-	-	-	-	-	-	-	-	-	-	-	-	IPR001357;IPR022047	Y	MCPH1	9606 [Organism: human] [Scientific Name: Homo sapiens]	Y	18	2WT8-B	-	-	-	-	-	-	-	-	-
3SZM	C	Q8NEM0	-	-	-	-	-	-	-	-	-	-	-	-	8.7	2.4	79	191	18	MOLECULE: MICROCEPHALIN;	-	-	-	-	-	-	-	-	-	-	-	-	-	IPR001357;IPR022047	Y	MCPH1	9606 [Organism: human] [Scientific Name: Homo sapiens]	Y	18	2WT8-B	-	-	-	-	-	-	-	-	-
3SZM	C	Q8NEM0	-	-	-	-	-	-	-	-	-	-	-	-	8.7	2.4	79	191	18	MOLECULE: MICROCEPHALIN;	-	-	-	-	-	-	-	-	-	-	-	-	-	IPR001357;IPR022047	Y	MCPH1	9606 [Organism: human] [Scientific Name: Homo sapiens]	Y	18	2WT8-B	-	-	-	-	-	-	-	-	-
3SZM	C	Q8NEM0	-	-	-	-	-	-	-	-	-	-	-	-	8.7	2.4	79	191	18	MOLECULE: MICROCEPHALIN;	-	-	-	-	-	-	-	-	-	-	-	-	-	IPR001357;IPR022047	Y	MCPH1	9606 [Organism: human] [Scientific Name: Homo sapiens]	Y	18	2WT8-B	-	-	-	-	-	-	-	-	-
3SZM	C	Q8NEM0	-	-	-	-	-	-	-	-	-	-	-	-	8.7	2.4	79	191	18	MOLECULE: MICROCEPHALIN;	-	-	-	-	-	-	-	-	-	-	-	-	-	IPR001357;IPR022047	Y	MCPH1	9606 [Organism: human] [Scientific Name: Homo sapiens]	Y	18	2WT8-B	-	-	-	-	-	-	-	-	-
3SZM	C	Q8NEM0	-	-	-	-	-	-	-	-	-	-	-	-	8.7	2.4	79	191	18	MOLECULE: MICROCEPHALIN;	-	-	-	-	-	-	-	-	-	-	-	-	-	IPR001357;IPR022047	Y	MCPH1	9606 [Organism: human] [Scientific Name: Homo sapiens]	Y	18	2WT8-B	-	-	-	-	-	-	-	-	-
3SZM	C	Q8NEM0	-	-	-	-	-	-	-	-	-	-	-	-	8.7	2.4	79	191	18	MOLECULE: MICROCEPHALIN;	-	-	-	-	-	-	-	-	-	-	-	-	-	IPR001357;IPR022047	Y	MCPH1	9606 [Organism: human] [Scientific Name: Homo sapiens]	Y	18	2WT8-B	-	-	-	-	-	-	-	-	-
3SZM	C	Q8NEM0	-	-	-	-	-	-	-	-	-	-	-	-	8.7	2.4	79	191	18	MOLECULE: MICROCEPHALIN;	-	-	-	-	-	-	-	-	-	-	-	-	-	IPR001357;IPR022047	Y	MCPH1	9606 [Organism: human] [Scientific Name: Homo sapiens]	Y	18	2WT8-B	-	-	-	-	-	-	-	-	-
3SZM	C	Q8NEM0	-	-	-	-	-	-	-	-	-	-	-	-	8.7	2.4	79	191	18	MOLECULE: MICROCEPHALIN;	-	-	-	-	-	-	-	-	-	-	-	-	-	IPR001357;IPR022047	Y	MCPH1	9606 [Organism: human] [Scientific Name: Homo sapiens]	Y	18	2WT8-B	-	-	-	-	-	-	-	-	-
3SZM	C	Q8NEM0	-	-	-	-	-	-	-	-	-	-	-	-	8.7	2.4	79	191	18	MOLECULE: MICROCEPHALIN;	-	-	-	-	-	-	-	-	-	-	-	-	-	IPR001357;IPR022047	Y	MCPH1	9606 [Organism: human] [Scientific Name: Homo sapiens]	Y	18	2WT8-B	-	-	-	-	-	-	-	-	-
3SZM	C	Q8NEM0	-	-	-	-	-	-	-	-	-	-	-	-	8.7	2.4	79	191	18	MOLECULE: MICROCEPHALIN;	-	-	-	-	-	-	-	-	-	-	-	-	-	IPR001357;IPR022047	Y	MCPH1	9606 [Organism: human] [Scientific Name: Homo sapiens]	Y	18	2WT8-B	-	-	-	-	-	-	-	-	-
3SZM	C	Q8NEM0	-	-	-	-	-	-	-	-	-	-	-	-	8.7	2.4	79	191	18	MOLECULE: MICROCEPHALIN;	-	-	-	-	-	-	-	-	-	-	-	-	-	IPR001357;IPR022047	Y	MCPH1	9606 [Organism: human] [Scientific Name: Homo sapiens]	Y	14	3U3Z-A01	-	-	-	-	-	-	-	-	-
3SZM	C	Q8NEM0	-	-	-	-	-	-	-	-	-	-	-	-	8.7	2.4	79	191	18	MOLECULE: MICROCEPHALIN;	-	-	-	-	-	-	-	-	-	-	-	-	-	IPR001357;IPR022047	Y	MCPH1	9606 [Organism: human] [Scientific Name: Homo sapiens]	Y	27	3U3Z-A02	-	-	-	-	-	-	-	-	-
3SHT	A	Q8NEM0	-	-	-	-	-	-	-	-	-	-	-	-	8.5	2.8	90	188	13	MOLECULE: MICROCEPHALIN;	-	-	-	-	-	-	-	-	-	-	-	-	-	IPR001357;IPR022047	Y	MCPH1	9606 [Organism: human] [Scientific Name: Homo sapiens]	Y	18	2WT8-B	-	-	-	-	-	-	-	-	-
3SHT	A	Q8NEM0	-	-	-	-	-	-	-	-	-	-	-	-	8.5	2.8	90	188	13	MOLECULE: MICROCEPHALIN;	-	-	-	-	-	-	-	-	-	-	-	-	-	IPR001357;IPR022047	Y	MCPH1	9606 [Organism: human] [Scientific Name: Homo sapiens]	Y	18	2WT8-B	-	-	-	-	-	-	-	-	-
3SHT	A	Q8NEM0	-	-	-	-	-	-	-	-	-	-	-	-	8.5	2.8	90	188	13	MOLECULE: MICROCEPHALIN;	-	-	-	-	-	-	-	-	-	-	-	-	-	IPR001357;IPR022047	Y	MCPH1	9606 [Organism: human] [Scientific Name: Homo sapiens]	Y	18	2WT8-B	-	-	-	-	-	-	-	-	-
3SHT	A	Q8NEM0	-	-	-	-	-	-	-	-	-	-	-	-	8.5	2.8	90	188	13	MOLECULE: MICROCEPHALIN;	-	-	-	-	-	-	-	-	-	-	-	-	-	IPR001357;IPR022047	Y	MCPH1	9606 [Organism: human] [Scientific Name: Homo sapiens]	Y	18	2WT8-B	-	-	-	-	-	-	-	-	-
3SHT	A	Q8NEM0	-	-	-	-	-	-	-	-	-	-	-	-	8.5	2.8	90	188	13	MOLECULE: MICROCEPHALIN;	-	-	-	-	-	-	-	-	-	-	-	-	-	IPR001357;IPR022047	Y	MCPH1	9606 [Organism: human] [Scientific Name: Homo sapiens]	Y	18	2WT8-B	-	-	-	-	-	-	-	-	-
3SHT	A	Q8NEM0	-	-	-	-	-	-	-	-	-	-	-	-	8.5	2.8	90	188	13	MOLECULE: MICROCEPHALIN;	-	-	-	-	-	-	-	-	-	-	-	-	-	IPR001357;IPR022047	Y	MCPH1	9606 [Organism: human] [Scientific Name: Homo sapiens]	Y	18	2WT8-B	-	-	-	-	-	-	-	-	-
3SHT	A	Q8NEM0	-	-	-	-	-	-	-	-	-	-	-	-	8.5	2.8	90	188	13	MOLECULE: MICROCEPHALIN;	-	-	-	-	-	-	-	-	-	-	-	-	-	IPR001357;IPR022047	Y	MCPH1	9606 [Organism: human] [Scientific Name: Homo sapiens]	Y	18	2WT8-B	-	-	-	-	-	-	-	-	-
3SHT	A	Q8NEM0	-	-	-	-	-	-	-	-	-	-	-	-	8.5	2.8	90	188	13	MOLECULE: MICROCEPHALIN;	-	-	-	-	-	-	-	-	-	-	-	-	-	IPR001357;IPR022047	Y	MCPH1	9606 [Organism: human] [Scientific Name: Homo sapiens]	Y	18	2WT8-B	-	-	-	-	-	-	-	-	-
3SHT	A	Q8NEM0	-	-	-	-	-	-	-	-	-	-	-	-	8.5	2.8	90	188	13	MOLECULE: MICROCEPHALIN;	-	-	-	-	-	-	-	-	-	-	-	-	-	IPR001357;IPR022047	Y	MCPH1	9606 [Organism: human] [Scientific Name: Homo sapiens]	Y	18	2WT8-B	-	-	-	-	-	-	-	-	-
3SHT	A	Q8NEM0	-	-	-	-	-	-	-	-	-	-	-	-	8.5	2.8	90	188	13	MOLECULE: MICROCEPHALIN;	-	-	-	-	-	-	-	-	-	-	-	-	-	IPR001357;IPR022047	Y	MCPH1	9606 [Organism: human] [Scientific Name: Homo sapiens]	Y	18	2WT8-B	-	-	-	-	-	-	-	-	-
3SHT	A	Q8NEM0	-	-	-	-	-	-	-	-	-	-	-	-	8.5	2.8	90	188	13	MOLECULE: MICROCEPHALIN;	-	-	-	-	-	-	-	-	-	-	-	-	-	IPR001357;IPR022047	Y	MCPH1	9606 [Organism: human] [Scientific Name: Homo sapiens]	Y	18	2WT8-B	-	-	-	-	-	-	-	-	-
3SHT	A	Q8NEM0	-	-	-	-	-	-	-	-	-	-	-	-	8.5	2.8	90	188	13	MOLECULE: MICROCEPHALIN;	-	-	-	-	-	-	-	-	-	-	-	-	-	IPR001357;IPR022047	Y	MCPH1	9606 [Organism: human] [Scientific Name: Homo sapiens]	Y	18	2WT8-B	-	-	-	-	-	-	-	-	-
3SHT	A	Q8NEM0	-	-	-	-	-	-	-	-	-	-	-	-	8.5	2.8	90	188	13	MOLECULE: MICROCEPHALIN;	-	-	-	-	-	-	-	-	-	-	-	-	-	IPR001357;IPR022047	Y	MCPH1	9606 [Organism: human] [Scientific Name: Homo sapiens]	Y	18	2WT8-B	-	-	-	-	-	-	-	-	-
3SHT	A	Q8NEM0	-	-	-	-	-	-	-	-	-	-	-	-	8.5	2.8	90	188	13	MOLECULE: MICROCEPHALIN;	-	-	-	-	-	-	-	-	-	-	-	-	-	IPR001357;IPR022047	Y	MCPH1	9606 [Organism: human] [Scientific Name: Homo sapiens]	Y	18	2WT8-B	-	-	-	-	-	-	-	-	-
3SHT	A	Q8NEM0	-	-	-	-	-	-	-	-	-	-	-	-	8.5	2.8	90	188	13	MOLECULE: MICROCEPHALIN;	-	-	-	-	-	-	-	-	-	-	-	-	-	IPR001357;IPR022047	Y	MCPH1	9606 [Organism: human] [Scientific Name: Homo sapiens]	Y	18	2WT8-B	-	-	-	-	-	-	-	-	-
3SHT	A	Q8NEM0	-	-	-	-	-	-	-	-	-	-	-	-	8.5	2.8	90	188	13	MOLECULE: MICROCEPHALIN;	-	-	-	-	-	-	-	-	-	-	-	-	-	IPR001357;IPR022047	Y	MCPH1	9606 [Organism: human] [Scientific Name: Homo sapiens]	Y	18	2WT8-B	-	-	-	-	-	-	-	-	-
3SHT	A	Q8NEM0	-	-	-	-	-	-	-	-	-	-	-	-	8.5	2.8	90	188	13	MOLECULE: MICROCEPHALIN;	-	-	-	-	-	-	-	-	-	-	-	-	-	IPR001357;IPR022047	Y	MCPH1	9606 [Organism: human] [Scientific Name: Homo sapiens]	Y	18	2WT8-B	-	-	-	-	-	-	-	-	-
3SHT	A	Q8NEM0	-	-	-	-	-	-	-	-	-	-	-	-	8.5	2.8	90	188	13	MOLECULE: MICROCEPHALIN;	-	-	-	-	-	-	-	-	-	-	-	-	-	IPR001357;IPR022047	Y	MCPH1	9606 [Organism: human] [Scientific Name: Homo sapiens]	Y	18	2WT8-B	-	-	-	-	-	-	-	-	-
3SHT	A	Q8NEM0	-	-	-	-	-	-	-	-	-	-	-	-	8.5	2.8	90	188	13	MOLECULE: MICROCEPHALIN;	-	-	-	-	-	-	-	-	-	-	-	-	-	IPR001357;IPR022047	Y	MCPH1	9606 [Organism: human] [Scientific Name: Homo sapiens]	Y	18	2WT8-B	-	-	-	-	-	-	-	-	-
3SHT	A	Q8NEM0	-	-	-	-	-	-	-	-	-	-	-	-	8.5	2.8	90	188	13	MOLECULE: MICROCEPHALIN;	-	-	-	-	-	-	-	-	-	-	-	-	-	IPR001357;IPR022047	Y	MCPH1	9606 [Organism: human] [Scientific Name: Homo sapiens]	Y	18	2WT8-B	-	-	-	-	-	-	-	-	-
3SHT	A	Q8NEM0	-	-	-	-	-	-	-	-	-	-	-	-	8.5	2.8	90	188	13	MOLECULE: MICROCEPHALIN;	-	-	-	-	-	-	-	-	-	-	-	-	-	IPR001357;IPR022047	Y	MCPH1	9606 [Organism: human] [Scientific Name: Homo sapiens]	Y	18	2WT8-B	-	-	-	-	-	-	-	-	-
3SHT	A	Q8NEM0	-	-	-	-	-	-	-	-	-	-	-	-	8.5	2.8	90	188	13	MOLECULE: MICROCEPHALIN;	-	-	-	-	-	-	-	-	-	-	-	-	-	IPR001357;IPR022047	Y	MCPH1	9606 [Organism: human] [Scientific Name: Homo sapiens]	Y	18	2WT8-B	-	-	-	-	-	-	-	-	-
3SHT	A	Q8NEM0	-	-	-	-	-	-	-	-	-	-	-	-	8.5	2.8	90	188	13	MOLECULE: MICROCEPHALIN;	-	-	-	-	-	-	-	-	-	-	-	-	-	IPR001357;IPR022047	Y	MCPH1	9606 [Organism: human] [Scientific Name: Homo sapiens]	Y	18	2WT8-B	-	-	-	-	-	-	-	-	-
3SHT	A	Q8NEM0	-	-	-	-	-	-	-	-	-	-	-	-	8.5	2.8	90	188	13	MOLECULE: MICROCEPHALIN;	-	-	-	-	-	-	-	-	-	-	-	-	-	IPR001357;IPR022047	Y	MCPH1	9606 [Organism: human] [Scientific Name: Homo sapiens]	Y	18	2WT8-B	-	-	-	-	-	-	-	-	-
3SHT	A	Q8NEM0	-	-	-	-	-	-	-	-	-	-	-	-	8.5	2.8	90	188	13	MOLECULE: MICROCEPHALIN;	-	-	-	-	-	-	-	-	-	-	-	-	-	IPR001357;IPR022047	Y	MCPH1	9606 [Organism: human] [Scientific Name: Homo sapiens]	Y	18	2WT8-B	-	-	-	-	-	-	-	-	-
3SHT	A	Q8NEM0	-	-	-	-	-	-	-	-	-	-	-	-	8.5	2.8	90	188	13	MOLECULE: MICROCEPHALIN;	-	-	-	-	-	-	-	-	-	-	-	-	-	IPR001357;IPR022047	Y	MCPH1	9606 [Organism: human] [Scientific Name: Homo sapiens]	Y	18	2WT8-B	-	-	-	-	-	-	-	-	-
3SHT	A	Q8NEM0	-	-	-	-	-	-	-	-	-	-	-	-	8.5	2.8	90	188	13	MOLECULE: MICROCEPHALIN;	-	-	-	-	-	-	-	-	-	-	-	-	-	IPR001357;IPR022047	Y	MCPH1	9606 [Organism: human] [Scientific Name: Homo sapiens]	Y	18	2WT8-B	-	-	-	-	-	-	-	-	-
3SHT	A	Q8NEM0	-	-	-	-	-	-	-	-	-	-	-	-	8.5	2.8	90	188	13	MOLECULE: MICROCEPHALIN;	-	-	-	-	-	-	-	-	-	-	-	-	-	IPR001357;IPR022047	Y	MCPH1	9606 [Organism: human] [Scientific Name: Homo sapiens]	Y	18	2WT8-B	-	-	-	-	-	-	-	-	-
3SHT	A	Q8NEM0	-	-	-	-	-	-	-	-	-	-	-	-	8.5	2.8	90	188	13	MOLECULE: MICROCEPHALIN;	-	-	-	-	-	-	-	-	-	-	-	-	-	IPR001357;IPR022047	Y	MCPH1	9606 [Organism: human] [Scientific Name: Homo sapiens]	Y	18	2WT8-B	-	-	-	-	-	-	-	-	-
3SHT	A	Q8NEM0	-	-	-	-	-	-	-	-	-	-	-	-	8.5	2.8	90	188	13	MOLECULE: MICROCEPHALIN;	-	-	-	-	-	-	-	-	-	-	-	-	-	IPR001357;IPR022047	Y	MCPH1	9606 [Organism: human] [Scientific Name: Homo sapiens]	Y	18	2WT8-B	-	-	-	-	-	-	-	-	-
3SHT	A	Q8NEM0	-	-	-	-	-	-	-	-	-	-	-	-	8.5	2.8	90	188	13	MOLECULE: MICROCEPHALIN;	-	-	-	-	-	-	-	-	-	-	-	-	-	IPR001357;IPR022047	Y	MCPH1	9606 [Organism: human] [Scientific Name: Homo sapiens]	Y	14	3U3Z-A01	-	-	-	-	-	-	-	-	-
3SHT	A	Q8NEM0	-	-	-	-	-	-	-	-	-	-	-	-	8.5	2.8	90	188	13	MOLECULE: MICROCEPHALIN;	-	-	-	-	-	-	-	-	-	-	-	-	-	IPR001357;IPR022047	Y	MCPH1	9606 [Organism: human] [Scientific Name: Homo sapiens]	Y	27	3U3Z-A02	-	-	-	-	-	-	-	-	-
3U3Z	A	Q8NEM0	-	-	-	-	-	-	-	-	-	-	-	-	8.4	2.6	88	189	13	MOLECULE: MICROCEPHALIN;	-	-	-	-	-	-	-	-	-	-	-	-	-	IPR001357;IPR022047	Y	MCPH1	9606 [Organism: human] [Scientific Name: Homo sapiens]	Y	18	2WT8-B	17	47.88	54.01	0.4573	0.5159	0.6975	2.39	85	86
3U3Z	A	Q8NEM0	-	-	-	-	-	-	-	-	-	-	-	-	8.4	2.6	88	189	13	MOLECULE: MICROCEPHALIN;	-	-	-	-	-	-	-	-	-	-	-	-	-	IPR001357;IPR022047	Y	MCPH1	9606 [Organism: human] [Scientific Name: Homo sapiens]	Y	18	2WT8-B	17	47.88	54.01	0.4573	0.5159	0.6975	2.39	85	86
3U3Z	A	Q8NEM0	-	-	-	-	-	-	-	-	-	-	-	-	8.4	2.6	88	189	13	MOLECULE: MICROCEPHALIN;	-	-	-	-	-	-	-	-	-	-	-	-	-	IPR001357;IPR022047	Y	MCPH1	9606 [Organism: human] [Scientific Name: Homo sapiens]	Y	18	2WT8-B	17	47.88	54.01	0.4573	0.5159	0.6975	2.39	85	86
3U3Z	A	Q8NEM0	-	-	-	-	-	-	-	-	-	-	-	-	8.4	2.6	88	189	13	MOLECULE: MICROCEPHALIN;	-	-	-	-	-	-	-	-	-	-	-	-	-	IPR001357;IPR022047	Y	MCPH1	9606 [Organism: human] [Scientific Name: Homo sapiens]	Y	18	2WT8-B	17	47.88	54.01	0.4573	0.5159	0.6975	2.39	85	86
3U3Z	A	Q8NEM0	-	-	-	-	-	-	-	-	-	-	-	-	8.4	2.6	88	189	13	MOLECULE: MICROCEPHALIN;	-	-	-	-	-	-	-	-	-	-	-	-	-	IPR001357;IPR022047	Y	MCPH1	9606 [Organism: human] [Scientific Name: Homo sapiens]	Y	18	2WT8-B	17	47.88	54.01	0.4573	0.5159	0.6975	2.39	85	86
3U3Z	A	Q8NEM0	-	-	-	-	-	-	-	-	-	-	-	-	8.4	2.6	88	189	13	MOLECULE: MICROCEPHALIN;	-	-	-	-	-	-	-	-	-	-	-	-	-	IPR001357;IPR022047	Y	MCPH1	9606 [Organism: human] [Scientific Name: Homo sapiens]	Y	18	2WT8-B	17	47.88	54.01	0.4573	0.5159	0.6975	2.39	85	86
3U3Z	A	Q8NEM0	-	-	-	-	-	-	-	-	-	-	-	-	8.4	2.6	88	189	13	MOLECULE: MICROCEPHALIN;	-	-	-	-	-	-	-	-	-	-	-	-	-	IPR001357;IPR022047	Y	MCPH1	9606 [Organism: human] [Scientific Name: Homo sapiens]	Y	18	2WT8-B	17	47.88	54.01	0.4573	0.5159	0.6975	2.39	85	86
3U3Z	A	Q8NEM0	-	-	-	-	-	-	-	-	-	-	-	-	8.4	2.6	88	189	13	MOLECULE: MICROCEPHALIN;	-	-	-	-	-	-	-	-	-	-	-	-	-	IPR001357;IPR022047	Y	MCPH1	9606 [Organism: human] [Scientific Name: Homo sapiens]	Y	18	2WT8-B	17	47.88	54.01	0.4573	0.5159	0.6975	2.39	85	86
3U3Z	A	Q8NEM0	-	-	-	-	-	-	-	-	-	-	-	-	8.4	2.6	88	189	13	MOLECULE: MICROCEPHALIN;	-	-	-	-	-	-	-	-	-	-	-	-	-	IPR001357;IPR022047	Y	MCPH1	9606 [Organism: human] [Scientific Name: Homo sapiens]	Y	18	2WT8-B	17	47.88	54.01	0.4573	0.5159	0.6975	2.39	85	86
3U3Z	A	Q8NEM0	-	-	-	-	-	-	-	-	-	-	-	-	8.4	2.6	88	189	13	MOLECULE: MICROCEPHALIN;	-	-	-	-	-	-	-	-	-	-	-	-	-	IPR001357;IPR022047	Y	MCPH1	9606 [Organism: human] [Scientific Name: Homo sapiens]	Y	18	2WT8-B	17	47.88	54.01	0.4573	0.5159	0.6975	2.39	85	86
3U3Z	A	Q8NEM0	-	-	-	-	-	-	-	-	-	-	-	-	8.4	2.6	88	189	13	MOLECULE: MICROCEPHALIN;	-	-	-	-	-	-	-	-	-	-	-	-	-	IPR001357;IPR022047	Y	MCPH1	9606 [Organism: human] [Scientific Name: Homo sapiens]	Y	18	2WT8-B	17	47.88	54.01	0.4573	0.5159	0.6975	2.39	85	86
3U3Z	A	Q8NEM0	-	-	-	-	-	-	-	-	-	-	-	-	8.4	2.6	88	189	13	MOLECULE: MICROCEPHALIN;	-	-	-	-	-	-	-	-	-	-	-	-	-	IPR001357;IPR022047	Y	MCPH1	9606 [Organism: human] [Scientific Name: Homo sapiens]	Y	18	2WT8-B	17	47.88	54.01	0.4573	0.5159	0.6975	2.39	85	86
3U3Z	A	Q8NEM0	-	-	-	-	-	-	-	-	-	-	-	-	8.4	2.6	88	189	13	MOLECULE: MICROCEPHALIN;	-	-	-	-	-	-	-	-	-	-	-	-	-	IPR001357;IPR022047	Y	MCPH1	9606 [Organism: human] [Scientific Name: Homo sapiens]	Y	18	2WT8-B	17	47.88	54.01	0.4573	0.5159	0.6975	2.39	85	86
3U3Z	A	Q8NEM0	-	-	-	-	-	-	-	-	-	-	-	-	8.4	2.6	88	189	13	MOLECULE: MICROCEPHALIN;	-	-	-	-	-	-	-	-	-	-	-	-	-	IPR001357;IPR022047	Y	MCPH1	9606 [Organism: human] [Scientific Name: Homo sapiens]	Y	18	2WT8-B	17	47.88	54.01	0.4573	0.5159	0.6975	2.39	85	86
3U3Z	A	Q8NEM0	-	-	-	-	-	-	-	-	-	-	-	-	8.4	2.6	88	189	13	MOLECULE: MICROCEPHALIN;	-	-	-	-	-	-	-	-	-	-	-	-	-	IPR001357;IPR022047	Y	MCPH1	9606 [Organism: human] [Scientific Name: Homo sapiens]	Y	18	2WT8-B	17	47.88	54.01	0.4573	0.5159	0.6975	2.39	85	86
3U3Z	A	Q8NEM0	-	-	-	-	-	-	-	-	-	-	-	-	8.4	2.6	88	189	13	MOLECULE: MICROCEPHALIN;	-	-	-	-	-	-	-	-	-	-	-	-	-	IPR001357;IPR022047	Y	MCPH1	9606 [Organism: human] [Scientific Name: Homo sapiens]	Y	18	2WT8-B	17	47.88	54.01	0.4573	0.5159	0.6975	2.39	85	86
3U3Z	A	Q8NEM0	-	-	-	-	-	-	-	-	-	-	-	-	8.4	2.6	88	189	13	MOLECULE: MICROCEPHALIN;	-	-	-	-	-	-	-	-	-	-	-	-	-	IPR001357;IPR022047	Y	MCPH1	9606 [Organism: human] [Scientific Name: Homo sapiens]	Y	18	2WT8-B	17	47.88	54.01	0.4573	0.5159	0.6975	2.39	85	86
3U3Z	A	Q8NEM0	-	-	-	-	-	-	-	-	-	-	-	-	8.4	2.6	88	189	13	MOLECULE: MICROCEPHALIN;	-	-	-	-	-	-	-	-	-	-	-	-	-	IPR001357;IPR022047	Y	MCPH1	9606 [Organism: human] [Scientific Name: Homo sapiens]	Y	18	2WT8-B	17	47.88	54.01	0.4573	0.5159	0.6975	2.39	85	86
3U3Z	A	Q8NEM0	-	-	-	-	-	-	-	-	-	-	-	-	8.4	2.6	88	189	13	MOLECULE: MICROCEPHALIN;	-	-	-	-	-	-	-	-	-	-	-	-	-	IPR001357;IPR022047	Y	MCPH1	9606 [Organism: human] [Scientific Name: Homo sapiens]	Y	18	2WT8-B	17	47.88	54.01	0.4573	0.5159	0.6975	2.39	85	86
3U3Z	A	Q8NEM0	-	-	-	-	-	-	-	-	-	-	-	-	8.4	2.6	88	189	13	MOLECULE: MICROCEPHALIN;	-	-	-	-	-	-	-	-	-	-	-	-	-	IPR001357;IPR022047	Y	MCPH1	9606 [Organism: human] [Scientific Name: Homo sapiens]	Y	18	2WT8-B	17	47.88	54.01	0.4573	0.5159	0.6975	2.39	85	86
3U3Z	A	Q8NEM0	-	-	-	-	-	-	-	-	-	-	-	-	8.4	2.6	88	189	13	MOLECULE: MICROCEPHALIN;	-	-	-	-	-	-	-	-	-	-	-	-	-	IPR001357;IPR022047	Y	MCPH1	9606 [Organism: human] [Scientific Name: Homo sapiens]	Y	18	2WT8-B	17	47.88	54.01	0.4573	0.5159	0.6975	2.39	85	86
3U3Z	A	Q8NEM0	-	-	-	-	-	-	-	-	-	-	-	-	8.4	2.6	88	189	13	MOLECULE: MICROCEPHALIN;	-	-	-	-	-	-	-	-	-	-	-	-	-	IPR001357;IPR022047	Y	MCPH1	9606 [Organism: human] [Scientific Name: Homo sapiens]	Y	18	2WT8-B	17	47.88	54.01	0.4573	0.5159	0.6975	2.39	85	86
3U3Z	A	Q8NEM0	-	-	-	-	-	-	-	-	-	-	-	-	8.4	2.6	88	189	13	MOLECULE: MICROCEPHALIN;	-	-	-	-	-	-	-	-	-	-	-	-	-	IPR001357;IPR022047	Y	MCPH1	9606 [Organism: human] [Scientific Name: Homo sapiens]	Y	18	2WT8-B	17	47.88	54.01	0.4573	0.5159	0.6975	2.39	85	86
3U3Z	A	Q8NEM0	-	-	-	-	-	-	-	-	-	-	-	-	8.4	2.6	88	189	13	MOLECULE: MICROCEPHALIN;	-	-	-	-	-	-	-	-	-	-	-	-	-	IPR001357;IPR022047	Y	MCPH1	9606 [Organism: human] [Scientific Name: Homo sapiens]	Y	18	2WT8-B	17	47.88	54.01	0.4573	0.5159	0.6975	2.39	85	86
3U3Z	A	Q8NEM0	-	-	-	-	-	-	-	-	-	-	-	-	8.4	2.6	88	189	13	MOLECULE: MICROCEPHALIN;	-	-	-	-	-	-	-	-	-	-	-	-	-	IPR001357;IPR022047	Y	MCPH1	9606 [Organism: human] [Scientific Name: Homo sapiens]	Y	18	2WT8-B	17	47.88	54.01	0.4573	0.5159	0.6975	2.39	85	86
3U3Z	A	Q8NEM0	-	-	-	-	-	-	-	-	-	-	-	-	8.4	2.6	88	189	13	MOLECULE: MICROCEPHALIN;	-	-	-	-	-	-	-	-	-	-	-	-	-	IPR001357;IPR022047	Y	MCPH1	9606 [Organism: human] [Scientific Name: Homo sapiens]	Y	18	2WT8-B	17	47.88	54.01	0.4573	0.5159	0.6975	2.39	85	86
3U3Z	A	Q8NEM0	-	-	-	-	-	-	-	-	-	-	-	-	8.4	2.6	88	189	13	MOLECULE: MICROCEPHALIN;	-	-	-	-	-	-	-	-	-	-	-	-	-	IPR001357;IPR022047	Y	MCPH1	9606 [Organism: human] [Scientific Name: Homo sapiens]	Y	18	2WT8-B	17	47.88	54.01	0.4573	0.5159	0.6975	2.39	85	86
3U3Z	A	Q8NEM0	-	-	-	-	-	-	-	-	-	-	-	-	8.4	2.6	88	189	13	MOLECULE: MICROCEPHALIN;	-	-	-	-	-	-	-	-	-	-	-	-	-	IPR001357;IPR022047	Y	MCPH1	9606 [Organism: human] [Scientific Name: Homo sapiens]	Y	18	2WT8-B	17	47.88	54.01	0.4573	0.5159	0.6975	2.39	85	86
3U3Z	A	Q8NEM0	-	-	-	-	-	-	-	-	-	-	-	-	8.4	2.6	88	189	13	MOLECULE: MICROCEPHALIN;	-	-	-	-	-	-	-	-	-	-	-	-	-	IPR001357;IPR022047	Y	MCPH1	9606 [Organism: human] [Scientific Name: Homo sapiens]	Y	18	2WT8-B	17	47.88	54.01	0.4573	0.5159	0.6975	2.39	85	86
3U3Z	A	Q8NEM0	-	-	-	-	-	-	-	-	-	-	-	-	8.4	2.6	88	189	13	MOLECULE: MICROCEPHALIN;	-	-	-	-	-	-	-	-	-	-	-	-	-	IPR001357;IPR022047	Y	MCPH1	9606 [Organism: human] [Scientific Name: Homo sapiens]	Y	18	2WT8-B	17	47.88	54.01	0.4573	0.5159	0.6975	2.39	85	86
3U3Z	A	Q8NEM0	-	-	-	-	-	-	-	-	-	-	-	-	8.4	2.6	88	189	13	MOLECULE: MICROCEPHALIN;	-	-	-	-	-	-	-	-	-	-	-	-	-	IPR001357;IPR022047	Y	MCPH1	9606 [Organism: human] [Scientific Name: Homo sapiens]	Y	14	3U3Z-A01	17	47.88	54.01	0.4573	0.5159	0.6975	2.39	85	86
3U3Z	A	Q8NEM0	-	-	-	-	-	-	-	-	-	-	-	-	8.4	2.6	88	189	13	MOLECULE: MICROCEPHALIN;	-	-	-	-	-	-	-	-	-	-	-	-	-	IPR001357;IPR022047	Y	MCPH1	9606 [Organism: human] [Scientific Name: Homo sapiens]	Y	27	3U3Z-A02	17	47.88	54.01	0.4573	0.5159	0.6975	2.39	85	86
3U3Z	A	Q8NEM0	-	-	-	-	-	-	-	-	-	-	-	-	8.4	2.6	88	189	13	MOLECULE: MICROCEPHALIN;	-	-	-	-	-	-	-	-	-	-	-	-	-	IPR001357;IPR022047	Y	MCPH1	9606 [Organism: human] [Scientific Name: Homo sapiens]	Y	18	2WT8-B	10	44.11	54.63	0.4398	0.5447	0.739	2.45	83	75
3U3Z	A	Q8NEM0	-	-	-	-	-	-	-	-	-	-	-	-	8.4	2.6	88	189	13	MOLECULE: MICROCEPHALIN;	-	-	-	-	-	-	-	-	-	-	-	-	-	IPR001357;IPR022047	Y	MCPH1	9606 [Organism: human] [Scientific Name: Homo sapiens]	Y	18	2WT8-B	10	44.11	54.63	0.4398	0.5447	0.739	2.45	83	75
3U3Z	A	Q8NEM0	-	-	-	-	-	-	-	-	-	-	-	-	8.4	2.6	88	189	13	MOLECULE: MICROCEPHALIN;	-	-	-	-	-	-	-	-	-	-	-	-	-	IPR001357;IPR022047	Y	MCPH1	9606 [Organism: human] [Scientific Name: Homo sapiens]	Y	18	2WT8-B	10	44.11	54.63	0.4398	0.5447	0.739	2.45	83	75
3U3Z	A	Q8NEM0	-	-	-	-	-	-	-	-	-	-	-	-	8.4	2.6	88	189	13	MOLECULE: MICROCEPHALIN;	-	-	-	-	-	-	-	-	-	-	-	-	-	IPR001357;IPR022047	Y	MCPH1	9606 [Organism: human] [Scientific Name: Homo sapiens]	Y	18	2WT8-B	10	44.11	54.63	0.4398	0.5447	0.739	2.45	83	75
3U3Z	A	Q8NEM0	-	-	-	-	-	-	-	-	-	-	-	-	8.4	2.6	88	189	13	MOLECULE: MICROCEPHALIN;	-	-	-	-	-	-	-	-	-	-	-	-	-	IPR001357;IPR022047	Y	MCPH1	9606 [Organism: human] [Scientific Name: Homo sapiens]	Y	18	2WT8-B	10	44.11	54.63	0.4398	0.5447	0.739	2.45	83	75
3U3Z	A	Q8NEM0	-	-	-	-	-	-	-	-	-	-	-	-	8.4	2.6	88	189	13	MOLECULE: MICROCEPHALIN;	-	-	-	-	-	-	-	-	-	-	-	-	-	IPR001357;IPR022047	Y	MCPH1	9606 [Organism: human] [Scientific Name: Homo sapiens]	Y	18	2WT8-B	10	44.11	54.63	0.4398	0.5447	0.739	2.45	83	75
3U3Z	A	Q8NEM0	-	-	-	-	-	-	-	-	-	-	-	-	8.4	2.6	88	189	13	MOLECULE: MICROCEPHALIN;	-	-	-	-	-	-	-	-	-	-	-	-	-	IPR001357;IPR022047	Y	MCPH1	9606 [Organism: human] [Scientific Name: Homo sapiens]	Y	18	2WT8-B	10	44.11	54.63	0.4398	0.5447	0.739	2.45	83	75
3U3Z	A	Q8NEM0	-	-	-	-	-	-	-	-	-	-	-	-	8.4	2.6	88	189	13	MOLECULE: MICROCEPHALIN;	-	-	-	-	-	-	-	-	-	-	-	-	-	IPR001357;IPR022047	Y	MCPH1	9606 [Organism: human] [Scientific Name: Homo sapiens]	Y	18	2WT8-B	10	44.11	54.63	0.4398	0.5447	0.739	2.45	83	75
3U3Z	A	Q8NEM0	-	-	-	-	-	-	-	-	-	-	-	-	8.4	2.6	88	189	13	MOLECULE: MICROCEPHALIN;	-	-	-	-	-	-	-	-	-	-	-	-	-	IPR001357;IPR022047	Y	MCPH1	9606 [Organism: human] [Scientific Name: Homo sapiens]	Y	18	2WT8-B	10	44.11	54.63	0.4398	0.5447	0.739	2.45	83	75
3U3Z	A	Q8NEM0	-	-	-	-	-	-	-	-	-	-	-	-	8.4	2.6	88	189	13	MOLECULE: MICROCEPHALIN;	-	-	-	-	-	-	-	-	-	-	-	-	-	IPR001357;IPR022047	Y	MCPH1	9606 [Organism: human] [Scientific Name: Homo sapiens]	Y	18	2WT8-B	10	44.11	54.63	0.4398	0.5447	0.739	2.45	83	75
3U3Z	A	Q8NEM0	-	-	-	-	-	-	-	-	-	-	-	-	8.4	2.6	88	189	13	MOLECULE: MICROCEPHALIN;	-	-	-	-	-	-	-	-	-	-	-	-	-	IPR001357;IPR022047	Y	MCPH1	9606 [Organism: human] [Scientific Name: Homo sapiens]	Y	18	2WT8-B	10	44.11	54.63	0.4398	0.5447	0.739	2.45	83	75
3U3Z	A	Q8NEM0	-	-	-	-	-	-	-	-	-	-	-	-	8.4	2.6	88	189	13	MOLECULE: MICROCEPHALIN;	-	-	-	-	-	-	-	-	-	-	-	-	-	IPR001357;IPR022047	Y	MCPH1	9606 [Organism: human] [Scientific Name: Homo sapiens]	Y	18	2WT8-B	10	44.11	54.63	0.4398	0.5447	0.739	2.45	83	75
3U3Z	A	Q8NEM0	-	-	-	-	-	-	-	-	-	-	-	-	8.4	2.6	88	189	13	MOLECULE: MICROCEPHALIN;	-	-	-	-	-	-	-	-	-	-	-	-	-	IPR001357;IPR022047	Y	MCPH1	9606 [Organism: human] [Scientific Name: Homo sapiens]	Y	18	2WT8-B	10	44.11	54.63	0.4398	0.5447	0.739	2.45	83	75
3U3Z	A	Q8NEM0	-	-	-	-	-	-	-	-	-	-	-	-	8.4	2.6	88	189	13	MOLECULE: MICROCEPHALIN;	-	-	-	-	-	-	-	-	-	-	-	-	-	IPR001357;IPR022047	Y	MCPH1	9606 [Organism: human] [Scientific Name: Homo sapiens]	Y	18	2WT8-B	10	44.11	54.63	0.4398	0.5447	0.739	2.45	83	75
3U3Z	A	Q8NEM0	-	-	-	-	-	-	-	-	-	-	-	-	8.4	2.6	88	189	13	MOLECULE: MICROCEPHALIN;	-	-	-	-	-	-	-	-	-	-	-	-	-	IPR001357;IPR022047	Y	MCPH1	9606 [Organism: human] [Scientific Name: Homo sapiens]	Y	18	2WT8-B	10	44.11	54.63	0.4398	0.5447	0.739	2.45	83	75
3U3Z	A	Q8NEM0	-	-	-	-	-	-	-	-	-	-	-	-	8.4	2.6	88	189	13	MOLECULE: MICROCEPHALIN;	-	-	-	-	-	-	-	-	-	-	-	-	-	IPR001357;IPR022047	Y	MCPH1	9606 [Organism: human] [Scientific Name: Homo sapiens]	Y	18	2WT8-B	10	44.11	54.63	0.4398	0.5447	0.739	2.45	83	75
3U3Z	A	Q8NEM0	-	-	-	-	-	-	-	-	-	-	-	-	8.4	2.6	88	189	13	MOLECULE: MICROCEPHALIN;	-	-	-	-	-	-	-	-	-	-	-	-	-	IPR001357;IPR022047	Y	MCPH1	9606 [Organism: human] [Scientific Name: Homo sapiens]	Y	18	2WT8-B	10	44.11	54.63	0.4398	0.5447	0.739	2.45	83	75
3U3Z	A	Q8NEM0	-	-	-	-	-	-	-	-	-	-	-	-	8.4	2.6	88	189	13	MOLECULE: MICROCEPHALIN;	-	-	-	-	-	-	-	-	-	-	-	-	-	IPR001357;IPR022047	Y	MCPH1	9606 [Organism: human] [Scientific Name: Homo sapiens]	Y	18	2WT8-B	10	44.11	54.63	0.4398	0.5447	0.739	2.45	83	75
3U3Z	A	Q8NEM0	-	-	-	-	-	-	-	-	-	-	-	-	8.4	2.6	88	189	13	MOLECULE: MICROCEPHALIN;	-	-	-	-	-	-	-	-	-	-	-	-	-	IPR001357;IPR022047	Y	MCPH1	9606 [Organism: human] [Scientific Name: Homo sapiens]	Y	18	2WT8-B	10	44.11	54.63	0.4398	0.5447	0.739	2.45	83	75
3U3Z	A	Q8NEM0	-	-	-	-	-	-	-	-	-	-	-	-	8.4	2.6	88	189	13	MOLECULE: MICROCEPHALIN;	-	-	-	-	-	-	-	-	-	-	-	-	-	IPR001357;IPR022047	Y	MCPH1	9606 [Organism: human] [Scientific Name: Homo sapiens]	Y	18	2WT8-B	10	44.11	54.63	0.4398	0.5447	0.739	2.45	83	75
3U3Z	A	Q8NEM0	-	-	-	-	-	-	-	-	-	-	-	-	8.4	2.6	88	189	13	MOLECULE: MICROCEPHALIN;	-	-	-	-	-	-	-	-	-	-	-	-	-	IPR001357;IPR022047	Y	MCPH1	9606 [Organism: human] [Scientific Name: Homo sapiens]	Y	18	2WT8-B	10	44.11	54.63	0.4398	0.5447	0.739	2.45	83	75
3U3Z	A	Q8NEM0	-	-	-	-	-	-	-	-	-	-	-	-	8.4	2.6	88	189	13	MOLECULE: MICROCEPHALIN;	-	-	-	-	-	-	-	-	-	-	-	-	-	IPR001357;IPR022047	Y	MCPH1	9606 [Organism: human] [Scientific Name: Homo sapiens]	Y	18	2WT8-B	10	44.11	54.63	0.4398	0.5447	0.739	2.45	83	75
3U3Z	A	Q8NEM0	-	-	-	-	-	-	-	-	-	-	-	-	8.4	2.6	88	189	13	MOLECULE: MICROCEPHALIN;	-	-	-	-	-	-	-	-	-	-	-	-	-	IPR001357;IPR022047	Y	MCPH1	9606 [Organism: human] [Scientific Name: Homo sapiens]	Y	18	2WT8-B	10	44.11	54.63	0.4398	0.5447	0.739	2.45	83	75
3U3Z	A	Q8NEM0	-	-	-	-	-	-	-	-	-	-	-	-	8.4	2.6	88	189	13	MOLECULE: MICROCEPHALIN;	-	-	-	-	-	-	-	-	-	-	-	-	-	IPR001357;IPR022047	Y	MCPH1	9606 [Organism: human] [Scientific Name: Homo sapiens]	Y	18	2WT8-B	10	44.11	54.63	0.4398	0.5447	0.739	2.45	83	75
3U3Z	A	Q8NEM0	-	-	-	-	-	-	-	-	-	-	-	-	8.4	2.6	88	189	13	MOLECULE: MICROCEPHALIN;	-	-	-	-	-	-	-	-	-	-	-	-	-	IPR001357;IPR022047	Y	MCPH1	9606 [Organism: human] [Scientific Name: Homo sapiens]	Y	18	2WT8-B	10	44.11	54.63	0.4398	0.5447	0.739	2.45	83	75
3U3Z	A	Q8NEM0	-	-	-	-	-	-	-	-	-	-	-	-	8.4	2.6	88	189	13	MOLECULE: MICROCEPHALIN;	-	-	-	-	-	-	-	-	-	-	-	-	-	IPR001357;IPR022047	Y	MCPH1	9606 [Organism: human] [Scientific Name: Homo sapiens]	Y	18	2WT8-B	10	44.11	54.63	0.4398	0.5447	0.739	2.45	83	75
3U3Z	A	Q8NEM0	-	-	-	-	-	-	-	-	-	-	-	-	8.4	2.6	88	189	13	MOLECULE: MICROCEPHALIN;	-	-	-	-	-	-	-	-	-	-	-	-	-	IPR001357;IPR022047	Y	MCPH1	9606 [Organism: human] [Scientific Name: Homo sapiens]	Y	18	2WT8-B	10	44.11	54.63	0.4398	0.5447	0.739	2.45	83	75
3U3Z	A	Q8NEM0	-	-	-	-	-	-	-	-	-	-	-	-	8.4	2.6	88	189	13	MOLECULE: MICROCEPHALIN;	-	-	-	-	-	-	-	-	-	-	-	-	-	IPR001357;IPR022047	Y	MCPH1	9606 [Organism: human] [Scientific Name: Homo sapiens]	Y	18	2WT8-B	10	44.11	54.63	0.4398	0.5447	0.739	2.45	83	75
3U3Z	A	Q8NEM0	-	-	-	-	-	-	-	-	-	-	-	-	8.4	2.6	88	189	13	MOLECULE: MICROCEPHALIN;	-	-	-	-	-	-	-	-	-	-	-	-	-	IPR001357;IPR022047	Y	MCPH1	9606 [Organism: human] [Scientific Name: Homo sapiens]	Y	18	2WT8-B	10	44.11	54.63	0.4398	0.5447	0.739	2.45	83	75
3U3Z	A	Q8NEM0	-	-	-	-	-	-	-	-	-	-	-	-	8.4	2.6	88	189	13	MOLECULE: MICROCEPHALIN;	-	-	-	-	-	-	-	-	-	-	-	-	-	IPR001357;IPR022047	Y	MCPH1	9606 [Organism: human] [Scientific Name: Homo sapiens]	Y	18	2WT8-B	10	44.11	54.63	0.4398	0.5447	0.739	2.45	83	75
3U3Z	A	Q8NEM0	-	-	-	-	-	-	-	-	-	-	-	-	8.4	2.6	88	189	13	MOLECULE: MICROCEPHALIN;	-	-	-	-	-	-	-	-	-	-	-	-	-	IPR001357;IPR022047	Y	MCPH1	9606 [Organism: human] [Scientific Name: Homo sapiens]	Y	14	3U3Z-A01	10	44.11	54.63	0.4398	0.5447	0.739	2.45	83	75
3U3Z	A	Q8NEM0	-	-	-	-	-	-	-	-	-	-	-	-	8.4	2.6	88	189	13	MOLECULE: MICROCEPHALIN;	-	-	-	-	-	-	-	-	-	-	-	-	-	IPR001357;IPR022047	Y	MCPH1	9606 [Organism: human] [Scientific Name: Homo sapiens]	Y	27	3U3Z-A02	10	44.11	54.63	0.4398	0.5447	0.739	2.45	83	75
3SZM	A	Q8NEM0	-	-	-	-	-	-	-	-	-	-	-	-	8.3	2.6	88	189	13	MOLECULE: MICROCEPHALIN;	-	-	-	-	-	-	-	-	-	-	-	-	-	IPR001357;IPR022047	Y	MCPH1	9606 [Organism: human] [Scientific Name: Homo sapiens]	Y	18	2WT8-B	-	-	-	-	-	-	-	-	-
3SZM	A	Q8NEM0	-	-	-	-	-	-	-	-	-	-	-	-	8.3	2.6	88	189	13	MOLECULE: MICROCEPHALIN;	-	-	-	-	-	-	-	-	-	-	-	-	-	IPR001357;IPR022047	Y	MCPH1	9606 [Organism: human] [Scientific Name: Homo sapiens]	Y	18	2WT8-B	-	-	-	-	-	-	-	-	-
3SZM	A	Q8NEM0	-	-	-	-	-	-	-	-	-	-	-	-	8.3	2.6	88	189	13	MOLECULE: MICROCEPHALIN;	-	-	-	-	-	-	-	-	-	-	-	-	-	IPR001357;IPR022047	Y	MCPH1	9606 [Organism: human] [Scientific Name: Homo sapiens]	Y	18	2WT8-B	-	-	-	-	-	-	-	-	-
3SZM	A	Q8NEM0	-	-	-	-	-	-	-	-	-	-	-	-	8.3	2.6	88	189	13	MOLECULE: MICROCEPHALIN;	-	-	-	-	-	-	-	-	-	-	-	-	-	IPR001357;IPR022047	Y	MCPH1	9606 [Organism: human] [Scientific Name: Homo sapiens]	Y	18	2WT8-B	-	-	-	-	-	-	-	-	-
3SZM	A	Q8NEM0	-	-	-	-	-	-	-	-	-	-	-	-	8.3	2.6	88	189	13	MOLECULE: MICROCEPHALIN;	-	-	-	-	-	-	-	-	-	-	-	-	-	IPR001357;IPR022047	Y	MCPH1	9606 [Organism: human] [Scientific Name: Homo sapiens]	Y	18	2WT8-B	-	-	-	-	-	-	-	-	-
3SZM	A	Q8NEM0	-	-	-	-	-	-	-	-	-	-	-	-	8.3	2.6	88	189	13	MOLECULE: MICROCEPHALIN;	-	-	-	-	-	-	-	-	-	-	-	-	-	IPR001357;IPR022047	Y	MCPH1	9606 [Organism: human] [Scientific Name: Homo sapiens]	Y	18	2WT8-B	-	-	-	-	-	-	-	-	-
3SZM	A	Q8NEM0	-	-	-	-	-	-	-	-	-	-	-	-	8.3	2.6	88	189	13	MOLECULE: MICROCEPHALIN;	-	-	-	-	-	-	-	-	-	-	-	-	-	IPR001357;IPR022047	Y	MCPH1	9606 [Organism: human] [Scientific Name: Homo sapiens]	Y	18	2WT8-B	-	-	-	-	-	-	-	-	-
3SZM	A	Q8NEM0	-	-	-	-	-	-	-	-	-	-	-	-	8.3	2.6	88	189	13	MOLECULE: MICROCEPHALIN;	-	-	-	-	-	-	-	-	-	-	-	-	-	IPR001357;IPR022047	Y	MCPH1	9606 [Organism: human] [Scientific Name: Homo sapiens]	Y	18	2WT8-B	-	-	-	-	-	-	-	-	-
3SZM	A	Q8NEM0	-	-	-	-	-	-	-	-	-	-	-	-	8.3	2.6	88	189	13	MOLECULE: MICROCEPHALIN;	-	-	-	-	-	-	-	-	-	-	-	-	-	IPR001357;IPR022047	Y	MCPH1	9606 [Organism: human] [Scientific Name: Homo sapiens]	Y	18	2WT8-B	-	-	-	-	-	-	-	-	-
3SZM	A	Q8NEM0	-	-	-	-	-	-	-	-	-	-	-	-	8.3	2.6	88	189	13	MOLECULE: MICROCEPHALIN;	-	-	-	-	-	-	-	-	-	-	-	-	-	IPR001357;IPR022047	Y	MCPH1	9606 [Organism: human] [Scientific Name: Homo sapiens]	Y	18	2WT8-B	-	-	-	-	-	-	-	-	-
3SZM	A	Q8NEM0	-	-	-	-	-	-	-	-	-	-	-	-	8.3	2.6	88	189	13	MOLECULE: MICROCEPHALIN;	-	-	-	-	-	-	-	-	-	-	-	-	-	IPR001357;IPR022047	Y	MCPH1	9606 [Organism: human] [Scientific Name: Homo sapiens]	Y	18	2WT8-B	-	-	-	-	-	-	-	-	-
3SZM	A	Q8NEM0	-	-	-	-	-	-	-	-	-	-	-	-	8.3	2.6	88	189	13	MOLECULE: MICROCEPHALIN;	-	-	-	-	-	-	-	-	-	-	-	-	-	IPR001357;IPR022047	Y	MCPH1	9606 [Organism: human] [Scientific Name: Homo sapiens]	Y	18	2WT8-B	-	-	-	-	-	-	-	-	-
3SZM	A	Q8NEM0	-	-	-	-	-	-	-	-	-	-	-	-	8.3	2.6	88	189	13	MOLECULE: MICROCEPHALIN;	-	-	-	-	-	-	-	-	-	-	-	-	-	IPR001357;IPR022047	Y	MCPH1	9606 [Organism: human] [Scientific Name: Homo sapiens]	Y	18	2WT8-B	-	-	-	-	-	-	-	-	-
3SZM	A	Q8NEM0	-	-	-	-	-	-	-	-	-	-	-	-	8.3	2.6	88	189	13	MOLECULE: MICROCEPHALIN;	-	-	-	-	-	-	-	-	-	-	-	-	-	IPR001357;IPR022047	Y	MCPH1	9606 [Organism: human] [Scientific Name: Homo sapiens]	Y	18	2WT8-B	-	-	-	-	-	-	-	-	-
3SZM	A	Q8NEM0	-	-	-	-	-	-	-	-	-	-	-	-	8.3	2.6	88	189	13	MOLECULE: MICROCEPHALIN;	-	-	-	-	-	-	-	-	-	-	-	-	-	IPR001357;IPR022047	Y	MCPH1	9606 [Organism: human] [Scientific Name: Homo sapiens]	Y	18	2WT8-B	-	-	-	-	-	-	-	-	-
3SZM	A	Q8NEM0	-	-	-	-	-	-	-	-	-	-	-	-	8.3	2.6	88	189	13	MOLECULE: MICROCEPHALIN;	-	-	-	-	-	-	-	-	-	-	-	-	-	IPR001357;IPR022047	Y	MCPH1	9606 [Organism: human] [Scientific Name: Homo sapiens]	Y	18	2WT8-B	-	-	-	-	-	-	-	-	-
3SZM	A	Q8NEM0	-	-	-	-	-	-	-	-	-	-	-	-	8.3	2.6	88	189	13	MOLECULE: MICROCEPHALIN;	-	-	-	-	-	-	-	-	-	-	-	-	-	IPR001357;IPR022047	Y	MCPH1	9606 [Organism: human] [Scientific Name: Homo sapiens]	Y	18	2WT8-B	-	-	-	-	-	-	-	-	-
3SZM	A	Q8NEM0	-	-	-	-	-	-	-	-	-	-	-	-	8.3	2.6	88	189	13	MOLECULE: MICROCEPHALIN;	-	-	-	-	-	-	-	-	-	-	-	-	-	IPR001357;IPR022047	Y	MCPH1	9606 [Organism: human] [Scientific Name: Homo sapiens]	Y	18	2WT8-B	-	-	-	-	-	-	-	-	-
3SZM	A	Q8NEM0	-	-	-	-	-	-	-	-	-	-	-	-	8.3	2.6	88	189	13	MOLECULE: MICROCEPHALIN;	-	-	-	-	-	-	-	-	-	-	-	-	-	IPR001357;IPR022047	Y	MCPH1	9606 [Organism: human] [Scientific Name: Homo sapiens]	Y	18	2WT8-B	-	-	-	-	-	-	-	-	-
3SZM	A	Q8NEM0	-	-	-	-	-	-	-	-	-	-	-	-	8.3	2.6	88	189	13	MOLECULE: MICROCEPHALIN;	-	-	-	-	-	-	-	-	-	-	-	-	-	IPR001357;IPR022047	Y	MCPH1	9606 [Organism: human] [Scientific Name: Homo sapiens]	Y	18	2WT8-B	-	-	-	-	-	-	-	-	-
3SZM	A	Q8NEM0	-	-	-	-	-	-	-	-	-	-	-	-	8.3	2.6	88	189	13	MOLECULE: MICROCEPHALIN;	-	-	-	-	-	-	-	-	-	-	-	-	-	IPR001357;IPR022047	Y	MCPH1	9606 [Organism: human] [Scientific Name: Homo sapiens]	Y	18	2WT8-B	-	-	-	-	-	-	-	-	-
3SZM	A	Q8NEM0	-	-	-	-	-	-	-	-	-	-	-	-	8.3	2.6	88	189	13	MOLECULE: MICROCEPHALIN;	-	-	-	-	-	-	-	-	-	-	-	-	-	IPR001357;IPR022047	Y	MCPH1	9606 [Organism: human] [Scientific Name: Homo sapiens]	Y	18	2WT8-B	-	-	-	-	-	-	-	-	-
3SZM	A	Q8NEM0	-	-	-	-	-	-	-	-	-	-	-	-	8.3	2.6	88	189	13	MOLECULE: MICROCEPHALIN;	-	-	-	-	-	-	-	-	-	-	-	-	-	IPR001357;IPR022047	Y	MCPH1	9606 [Organism: human] [Scientific Name: Homo sapiens]	Y	18	2WT8-B	-	-	-	-	-	-	-	-	-
3SZM	A	Q8NEM0	-	-	-	-	-	-	-	-	-	-	-	-	8.3	2.6	88	189	13	MOLECULE: MICROCEPHALIN;	-	-	-	-	-	-	-	-	-	-	-	-	-	IPR001357;IPR022047	Y	MCPH1	9606 [Organism: human] [Scientific Name: Homo sapiens]	Y	18	2WT8-B	-	-	-	-	-	-	-	-	-
3SZM	A	Q8NEM0	-	-	-	-	-	-	-	-	-	-	-	-	8.3	2.6	88	189	13	MOLECULE: MICROCEPHALIN;	-	-	-	-	-	-	-	-	-	-	-	-	-	IPR001357;IPR022047	Y	MCPH1	9606 [Organism: human] [Scientific Name: Homo sapiens]	Y	18	2WT8-B	-	-	-	-	-	-	-	-	-
3SZM	A	Q8NEM0	-	-	-	-	-	-	-	-	-	-	-	-	8.3	2.6	88	189	13	MOLECULE: MICROCEPHALIN;	-	-	-	-	-	-	-	-	-	-	-	-	-	IPR001357;IPR022047	Y	MCPH1	9606 [Organism: human] [Scientific Name: Homo sapiens]	Y	18	2WT8-B	-	-	-	-	-	-	-	-	-
3SZM	A	Q8NEM0	-	-	-	-	-	-	-	-	-	-	-	-	8.3	2.6	88	189	13	MOLECULE: MICROCEPHALIN;	-	-	-	-	-	-	-	-	-	-	-	-	-	IPR001357;IPR022047	Y	MCPH1	9606 [Organism: human] [Scientific Name: Homo sapiens]	Y	18	2WT8-B	-	-	-	-	-	-	-	-	-
3SZM	A	Q8NEM0	-	-	-	-	-	-	-	-	-	-	-	-	8.3	2.6	88	189	13	MOLECULE: MICROCEPHALIN;	-	-	-	-	-	-	-	-	-	-	-	-	-	IPR001357;IPR022047	Y	MCPH1	9606 [Organism: human] [Scientific Name: Homo sapiens]	Y	18	2WT8-B	-	-	-	-	-	-	-	-	-
3SZM	A	Q8NEM0	-	-	-	-	-	-	-	-	-	-	-	-	8.3	2.6	88	189	13	MOLECULE: MICROCEPHALIN;	-	-	-	-	-	-	-	-	-	-	-	-	-	IPR001357;IPR022047	Y	MCPH1	9606 [Organism: human] [Scientific Name: Homo sapiens]	Y	18	2WT8-B	-	-	-	-	-	-	-	-	-
3SZM	A	Q8NEM0	-	-	-	-	-	-	-	-	-	-	-	-	8.3	2.6	88	189	13	MOLECULE: MICROCEPHALIN;	-	-	-	-	-	-	-	-	-	-	-	-	-	IPR001357;IPR022047	Y	MCPH1	9606 [Organism: human] [Scientific Name: Homo sapiens]	Y	18	2WT8-B	-	-	-	-	-	-	-	-	-
3SZM	A	Q8NEM0	-	-	-	-	-	-	-	-	-	-	-	-	8.3	2.6	88	189	13	MOLECULE: MICROCEPHALIN;	-	-	-	-	-	-	-	-	-	-	-	-	-	IPR001357;IPR022047	Y	MCPH1	9606 [Organism: human] [Scientific Name: Homo sapiens]	Y	14	3U3Z-A01	-	-	-	-	-	-	-	-	-
3SZM	A	Q8NEM0	-	-	-	-	-	-	-	-	-	-	-	-	8.3	2.6	88	189	13	MOLECULE: MICROCEPHALIN;	-	-	-	-	-	-	-	-	-	-	-	-	-	IPR001357;IPR022047	Y	MCPH1	9606 [Organism: human] [Scientific Name: Homo sapiens]	Y	27	3U3Z-A02	-	-	-	-	-	-	-	-	-
3SHV	A	Q8NEM0	-	-	-	-	-	-	-	-	-	-	-	-	8.3	2.7	90	189	12	MOLECULE: MICROCEPHALIN;	-	-	-	-	-	-	-	-	-	-	-	-	-	IPR001357;IPR022047	Y	MCPH1	9606 [Organism: human] [Scientific Name: Homo sapiens]	Y	18	2WT8-B	-	-	-	-	-	-	-	-	-
3SHV	A	Q8NEM0	-	-	-	-	-	-	-	-	-	-	-	-	8.3	2.7	90	189	12	MOLECULE: MICROCEPHALIN;	-	-	-	-	-	-	-	-	-	-	-	-	-	IPR001357;IPR022047	Y	MCPH1	9606 [Organism: human] [Scientific Name: Homo sapiens]	Y	18	2WT8-B	-	-	-	-	-	-	-	-	-
3SHV	A	Q8NEM0	-	-	-	-	-	-	-	-	-	-	-	-	8.3	2.7	90	189	12	MOLECULE: MICROCEPHALIN;	-	-	-	-	-	-	-	-	-	-	-	-	-	IPR001357;IPR022047	Y	MCPH1	9606 [Organism: human] [Scientific Name: Homo sapiens]	Y	18	2WT8-B	-	-	-	-	-	-	-	-	-
3SHV	A	Q8NEM0	-	-	-	-	-	-	-	-	-	-	-	-	8.3	2.7	90	189	12	MOLECULE: MICROCEPHALIN;	-	-	-	-	-	-	-	-	-	-	-	-	-	IPR001357;IPR022047	Y	MCPH1	9606 [Organism: human] [Scientific Name: Homo sapiens]	Y	18	2WT8-B	-	-	-	-	-	-	-	-	-
3SHV	A	Q8NEM0	-	-	-	-	-	-	-	-	-	-	-	-	8.3	2.7	90	189	12	MOLECULE: MICROCEPHALIN;	-	-	-	-	-	-	-	-	-	-	-	-	-	IPR001357;IPR022047	Y	MCPH1	9606 [Organism: human] [Scientific Name: Homo sapiens]	Y	18	2WT8-B	-	-	-	-	-	-	-	-	-
3SHV	A	Q8NEM0	-	-	-	-	-	-	-	-	-	-	-	-	8.3	2.7	90	189	12	MOLECULE: MICROCEPHALIN;	-	-	-	-	-	-	-	-	-	-	-	-	-	IPR001357;IPR022047	Y	MCPH1	9606 [Organism: human] [Scientific Name: Homo sapiens]	Y	18	2WT8-B	-	-	-	-	-	-	-	-	-
3SHV	A	Q8NEM0	-	-	-	-	-	-	-	-	-	-	-	-	8.3	2.7	90	189	12	MOLECULE: MICROCEPHALIN;	-	-	-	-	-	-	-	-	-	-	-	-	-	IPR001357;IPR022047	Y	MCPH1	9606 [Organism: human] [Scientific Name: Homo sapiens]	Y	18	2WT8-B	-	-	-	-	-	-	-	-	-
3SHV	A	Q8NEM0	-	-	-	-	-	-	-	-	-	-	-	-	8.3	2.7	90	189	12	MOLECULE: MICROCEPHALIN;	-	-	-	-	-	-	-	-	-	-	-	-	-	IPR001357;IPR022047	Y	MCPH1	9606 [Organism: human] [Scientific Name: Homo sapiens]	Y	18	2WT8-B	-	-	-	-	-	-	-	-	-
3SHV	A	Q8NEM0	-	-	-	-	-	-	-	-	-	-	-	-	8.3	2.7	90	189	12	MOLECULE: MICROCEPHALIN;	-	-	-	-	-	-	-	-	-	-	-	-	-	IPR001357;IPR022047	Y	MCPH1	9606 [Organism: human] [Scientific Name: Homo sapiens]	Y	18	2WT8-B	-	-	-	-	-	-	-	-	-
3SHV	A	Q8NEM0	-	-	-	-	-	-	-	-	-	-	-	-	8.3	2.7	90	189	12	MOLECULE: MICROCEPHALIN;	-	-	-	-	-	-	-	-	-	-	-	-	-	IPR001357;IPR022047	Y	MCPH1	9606 [Organism: human] [Scientific Name: Homo sapiens]	Y	18	2WT8-B	-	-	-	-	-	-	-	-	-
3SHV	A	Q8NEM0	-	-	-	-	-	-	-	-	-	-	-	-	8.3	2.7	90	189	12	MOLECULE: MICROCEPHALIN;	-	-	-	-	-	-	-	-	-	-	-	-	-	IPR001357;IPR022047	Y	MCPH1	9606 [Organism: human] [Scientific Name: Homo sapiens]	Y	18	2WT8-B	-	-	-	-	-	-	-	-	-
3SHV	A	Q8NEM0	-	-	-	-	-	-	-	-	-	-	-	-	8.3	2.7	90	189	12	MOLECULE: MICROCEPHALIN;	-	-	-	-	-	-	-	-	-	-	-	-	-	IPR001357;IPR022047	Y	MCPH1	9606 [Organism: human] [Scientific Name: Homo sapiens]	Y	18	2WT8-B	-	-	-	-	-	-	-	-	-
3SHV	A	Q8NEM0	-	-	-	-	-	-	-	-	-	-	-	-	8.3	2.7	90	189	12	MOLECULE: MICROCEPHALIN;	-	-	-	-	-	-	-	-	-	-	-	-	-	IPR001357;IPR022047	Y	MCPH1	9606 [Organism: human] [Scientific Name: Homo sapiens]	Y	18	2WT8-B	-	-	-	-	-	-	-	-	-
3SHV	A	Q8NEM0	-	-	-	-	-	-	-	-	-	-	-	-	8.3	2.7	90	189	12	MOLECULE: MICROCEPHALIN;	-	-	-	-	-	-	-	-	-	-	-	-	-	IPR001357;IPR022047	Y	MCPH1	9606 [Organism: human] [Scientific Name: Homo sapiens]	Y	18	2WT8-B	-	-	-	-	-	-	-	-	-
3SHV	A	Q8NEM0	-	-	-	-	-	-	-	-	-	-	-	-	8.3	2.7	90	189	12	MOLECULE: MICROCEPHALIN;	-	-	-	-	-	-	-	-	-	-	-	-	-	IPR001357;IPR022047	Y	MCPH1	9606 [Organism: human] [Scientific Name: Homo sapiens]	Y	18	2WT8-B	-	-	-	-	-	-	-	-	-
3SHV	A	Q8NEM0	-	-	-	-	-	-	-	-	-	-	-	-	8.3	2.7	90	189	12	MOLECULE: MICROCEPHALIN;	-	-	-	-	-	-	-	-	-	-	-	-	-	IPR001357;IPR022047	Y	MCPH1	9606 [Organism: human] [Scientific Name: Homo sapiens]	Y	18	2WT8-B	-	-	-	-	-	-	-	-	-
3SHV	A	Q8NEM0	-	-	-	-	-	-	-	-	-	-	-	-	8.3	2.7	90	189	12	MOLECULE: MICROCEPHALIN;	-	-	-	-	-	-	-	-	-	-	-	-	-	IPR001357;IPR022047	Y	MCPH1	9606 [Organism: human] [Scientific Name: Homo sapiens]	Y	18	2WT8-B	-	-	-	-	-	-	-	-	-
3SHV	A	Q8NEM0	-	-	-	-	-	-	-	-	-	-	-	-	8.3	2.7	90	189	12	MOLECULE: MICROCEPHALIN;	-	-	-	-	-	-	-	-	-	-	-	-	-	IPR001357;IPR022047	Y	MCPH1	9606 [Organism: human] [Scientific Name: Homo sapiens]	Y	18	2WT8-B	-	-	-	-	-	-	-	-	-
3SHV	A	Q8NEM0	-	-	-	-	-	-	-	-	-	-	-	-	8.3	2.7	90	189	12	MOLECULE: MICROCEPHALIN;	-	-	-	-	-	-	-	-	-	-	-	-	-	IPR001357;IPR022047	Y	MCPH1	9606 [Organism: human] [Scientific Name: Homo sapiens]	Y	18	2WT8-B	-	-	-	-	-	-	-	-	-
3SHV	A	Q8NEM0	-	-	-	-	-	-	-	-	-	-	-	-	8.3	2.7	90	189	12	MOLECULE: MICROCEPHALIN;	-	-	-	-	-	-	-	-	-	-	-	-	-	IPR001357;IPR022047	Y	MCPH1	9606 [Organism: human] [Scientific Name: Homo sapiens]	Y	18	2WT8-B	-	-	-	-	-	-	-	-	-
3SHV	A	Q8NEM0	-	-	-	-	-	-	-	-	-	-	-	-	8.3	2.7	90	189	12	MOLECULE: MICROCEPHALIN;	-	-	-	-	-	-	-	-	-	-	-	-	-	IPR001357;IPR022047	Y	MCPH1	9606 [Organism: human] [Scientific Name: Homo sapiens]	Y	18	2WT8-B	-	-	-	-	-	-	-	-	-
3SHV	A	Q8NEM0	-	-	-	-	-	-	-	-	-	-	-	-	8.3	2.7	90	189	12	MOLECULE: MICROCEPHALIN;	-	-	-	-	-	-	-	-	-	-	-	-	-	IPR001357;IPR022047	Y	MCPH1	9606 [Organism: human] [Scientific Name: Homo sapiens]	Y	18	2WT8-B	-	-	-	-	-	-	-	-	-
3SHV	A	Q8NEM0	-	-	-	-	-	-	-	-	-	-	-	-	8.3	2.7	90	189	12	MOLECULE: MICROCEPHALIN;	-	-	-	-	-	-	-	-	-	-	-	-	-	IPR001357;IPR022047	Y	MCPH1	9606 [Organism: human] [Scientific Name: Homo sapiens]	Y	18	2WT8-B	-	-	-	-	-	-	-	-	-
3SHV	A	Q8NEM0	-	-	-	-	-	-	-	-	-	-	-	-	8.3	2.7	90	189	12	MOLECULE: MICROCEPHALIN;	-	-	-	-	-	-	-	-	-	-	-	-	-	IPR001357;IPR022047	Y	MCPH1	9606 [Organism: human] [Scientific Name: Homo sapiens]	Y	18	2WT8-B	-	-	-	-	-	-	-	-	-
3SHV	A	Q8NEM0	-	-	-	-	-	-	-	-	-	-	-	-	8.3	2.7	90	189	12	MOLECULE: MICROCEPHALIN;	-	-	-	-	-	-	-	-	-	-	-	-	-	IPR001357;IPR022047	Y	MCPH1	9606 [Organism: human] [Scientific Name: Homo sapiens]	Y	18	2WT8-B	-	-	-	-	-	-	-	-	-
3SHV	A	Q8NEM0	-	-	-	-	-	-	-	-	-	-	-	-	8.3	2.7	90	189	12	MOLECULE: MICROCEPHALIN;	-	-	-	-	-	-	-	-	-	-	-	-	-	IPR001357;IPR022047	Y	MCPH1	9606 [Organism: human] [Scientific Name: Homo sapiens]	Y	18	2WT8-B	-	-	-	-	-	-	-	-	-
3SHV	A	Q8NEM0	-	-	-	-	-	-	-	-	-	-	-	-	8.3	2.7	90	189	12	MOLECULE: MICROCEPHALIN;	-	-	-	-	-	-	-	-	-	-	-	-	-	IPR001357;IPR022047	Y	MCPH1	9606 [Organism: human] [Scientific Name: Homo sapiens]	Y	18	2WT8-B	-	-	-	-	-	-	-	-	-
3SHV	A	Q8NEM0	-	-	-	-	-	-	-	-	-	-	-	-	8.3	2.7	90	189	12	MOLECULE: MICROCEPHALIN;	-	-	-	-	-	-	-	-	-	-	-	-	-	IPR001357;IPR022047	Y	MCPH1	9606 [Organism: human] [Scientific Name: Homo sapiens]	Y	18	2WT8-B	-	-	-	-	-	-	-	-	-
3SHV	A	Q8NEM0	-	-	-	-	-	-	-	-	-	-	-	-	8.3	2.7	90	189	12	MOLECULE: MICROCEPHALIN;	-	-	-	-	-	-	-	-	-	-	-	-	-	IPR001357;IPR022047	Y	MCPH1	9606 [Organism: human] [Scientific Name: Homo sapiens]	Y	18	2WT8-B	-	-	-	-	-	-	-	-	-
3SHV	A	Q8NEM0	-	-	-	-	-	-	-	-	-	-	-	-	8.3	2.7	90	189	12	MOLECULE: MICROCEPHALIN;	-	-	-	-	-	-	-	-	-	-	-	-	-	IPR001357;IPR022047	Y	MCPH1	9606 [Organism: human] [Scientific Name: Homo sapiens]	Y	18	2WT8-B	-	-	-	-	-	-	-	-	-
3SHV	A	Q8NEM0	-	-	-	-	-	-	-	-	-	-	-	-	8.3	2.7	90	189	12	MOLECULE: MICROCEPHALIN;	-	-	-	-	-	-	-	-	-	-	-	-	-	IPR001357;IPR022047	Y	MCPH1	9606 [Organism: human] [Scientific Name: Homo sapiens]	Y	14	3U3Z-A01	-	-	-	-	-	-	-	-	-
3SHV	A	Q8NEM0	-	-	-	-	-	-	-	-	-	-	-	-	8.3	2.7	90	189	12	MOLECULE: MICROCEPHALIN;	-	-	-	-	-	-	-	-	-	-	-	-	-	IPR001357;IPR022047	Y	MCPH1	9606 [Organism: human] [Scientific Name: Homo sapiens]	Y	27	3U3Z-A02	-	-	-	-	-	-	-	-	-
3SZM	B	Q8NEM0	-	-	-	-	-	-	-	-	-	-	-	-	8.2	2.7	89	189	13	MOLECULE: MICROCEPHALIN;	-	-	-	-	-	-	-	-	-	-	-	-	-	IPR001357;IPR022047	Y	MCPH1	9606 [Organism: human] [Scientific Name: Homo sapiens]	Y	18	2WT8-B	-	-	-	-	-	-	-	-	-
3SZM	B	Q8NEM0	-	-	-	-	-	-	-	-	-	-	-	-	8.2	2.7	89	189	13	MOLECULE: MICROCEPHALIN;	-	-	-	-	-	-	-	-	-	-	-	-	-	IPR001357;IPR022047	Y	MCPH1	9606 [Organism: human] [Scientific Name: Homo sapiens]	Y	18	2WT8-B	-	-	-	-	-	-	-	-	-
3SZM	B	Q8NEM0	-	-	-	-	-	-	-	-	-	-	-	-	8.2	2.7	89	189	13	MOLECULE: MICROCEPHALIN;	-	-	-	-	-	-	-	-	-	-	-	-	-	IPR001357;IPR022047	Y	MCPH1	9606 [Organism: human] [Scientific Name: Homo sapiens]	Y	18	2WT8-B	-	-	-	-	-	-	-	-	-
3SZM	B	Q8NEM0	-	-	-	-	-	-	-	-	-	-	-	-	8.2	2.7	89	189	13	MOLECULE: MICROCEPHALIN;	-	-	-	-	-	-	-	-	-	-	-	-	-	IPR001357;IPR022047	Y	MCPH1	9606 [Organism: human] [Scientific Name: Homo sapiens]	Y	18	2WT8-B	-	-	-	-	-	-	-	-	-
3SZM	B	Q8NEM0	-	-	-	-	-	-	-	-	-	-	-	-	8.2	2.7	89	189	13	MOLECULE: MICROCEPHALIN;	-	-	-	-	-	-	-	-	-	-	-	-	-	IPR001357;IPR022047	Y	MCPH1	9606 [Organism: human] [Scientific Name: Homo sapiens]	Y	18	2WT8-B	-	-	-	-	-	-	-	-	-
3SZM	B	Q8NEM0	-	-	-	-	-	-	-	-	-	-	-	-	8.2	2.7	89	189	13	MOLECULE: MICROCEPHALIN;	-	-	-	-	-	-	-	-	-	-	-	-	-	IPR001357;IPR022047	Y	MCPH1	9606 [Organism: human] [Scientific Name: Homo sapiens]	Y	18	2WT8-B	-	-	-	-	-	-	-	-	-
3SZM	B	Q8NEM0	-	-	-	-	-	-	-	-	-	-	-	-	8.2	2.7	89	189	13	MOLECULE: MICROCEPHALIN;	-	-	-	-	-	-	-	-	-	-	-	-	-	IPR001357;IPR022047	Y	MCPH1	9606 [Organism: human] [Scientific Name: Homo sapiens]	Y	18	2WT8-B	-	-	-	-	-	-	-	-	-
3SZM	B	Q8NEM0	-	-	-	-	-	-	-	-	-	-	-	-	8.2	2.7	89	189	13	MOLECULE: MICROCEPHALIN;	-	-	-	-	-	-	-	-	-	-	-	-	-	IPR001357;IPR022047	Y	MCPH1	9606 [Organism: human] [Scientific Name: Homo sapiens]	Y	18	2WT8-B	-	-	-	-	-	-	-	-	-
3SZM	B	Q8NEM0	-	-	-	-	-	-	-	-	-	-	-	-	8.2	2.7	89	189	13	MOLECULE: MICROCEPHALIN;	-	-	-	-	-	-	-	-	-	-	-	-	-	IPR001357;IPR022047	Y	MCPH1	9606 [Organism: human] [Scientific Name: Homo sapiens]	Y	18	2WT8-B	-	-	-	-	-	-	-	-	-
3SZM	B	Q8NEM0	-	-	-	-	-	-	-	-	-	-	-	-	8.2	2.7	89	189	13	MOLECULE: MICROCEPHALIN;	-	-	-	-	-	-	-	-	-	-	-	-	-	IPR001357;IPR022047	Y	MCPH1	9606 [Organism: human] [Scientific Name: Homo sapiens]	Y	18	2WT8-B	-	-	-	-	-	-	-	-	-
3SZM	B	Q8NEM0	-	-	-	-	-	-	-	-	-	-	-	-	8.2	2.7	89	189	13	MOLECULE: MICROCEPHALIN;	-	-	-	-	-	-	-	-	-	-	-	-	-	IPR001357;IPR022047	Y	MCPH1	9606 [Organism: human] [Scientific Name: Homo sapiens]	Y	18	2WT8-B	-	-	-	-	-	-	-	-	-
3SZM	B	Q8NEM0	-	-	-	-	-	-	-	-	-	-	-	-	8.2	2.7	89	189	13	MOLECULE: MICROCEPHALIN;	-	-	-	-	-	-	-	-	-	-	-	-	-	IPR001357;IPR022047	Y	MCPH1	9606 [Organism: human] [Scientific Name: Homo sapiens]	Y	18	2WT8-B	-	-	-	-	-	-	-	-	-
3SZM	B	Q8NEM0	-	-	-	-	-	-	-	-	-	-	-	-	8.2	2.7	89	189	13	MOLECULE: MICROCEPHALIN;	-	-	-	-	-	-	-	-	-	-	-	-	-	IPR001357;IPR022047	Y	MCPH1	9606 [Organism: human] [Scientific Name: Homo sapiens]	Y	18	2WT8-B	-	-	-	-	-	-	-	-	-
3SZM	B	Q8NEM0	-	-	-	-	-	-	-	-	-	-	-	-	8.2	2.7	89	189	13	MOLECULE: MICROCEPHALIN;	-	-	-	-	-	-	-	-	-	-	-	-	-	IPR001357;IPR022047	Y	MCPH1	9606 [Organism: human] [Scientific Name: Homo sapiens]	Y	18	2WT8-B	-	-	-	-	-	-	-	-	-
3SZM	B	Q8NEM0	-	-	-	-	-	-	-	-	-	-	-	-	8.2	2.7	89	189	13	MOLECULE: MICROCEPHALIN;	-	-	-	-	-	-	-	-	-	-	-	-	-	IPR001357;IPR022047	Y	MCPH1	9606 [Organism: human] [Scientific Name: Homo sapiens]	Y	18	2WT8-B	-	-	-	-	-	-	-	-	-
3SZM	B	Q8NEM0	-	-	-	-	-	-	-	-	-	-	-	-	8.2	2.7	89	189	13	MOLECULE: MICROCEPHALIN;	-	-	-	-	-	-	-	-	-	-	-	-	-	IPR001357;IPR022047	Y	MCPH1	9606 [Organism: human] [Scientific Name: Homo sapiens]	Y	18	2WT8-B	-	-	-	-	-	-	-	-	-
3SZM	B	Q8NEM0	-	-	-	-	-	-	-	-	-	-	-	-	8.2	2.7	89	189	13	MOLECULE: MICROCEPHALIN;	-	-	-	-	-	-	-	-	-	-	-	-	-	IPR001357;IPR022047	Y	MCPH1	9606 [Organism: human] [Scientific Name: Homo sapiens]	Y	18	2WT8-B	-	-	-	-	-	-	-	-	-
3SZM	B	Q8NEM0	-	-	-	-	-	-	-	-	-	-	-	-	8.2	2.7	89	189	13	MOLECULE: MICROCEPHALIN;	-	-	-	-	-	-	-	-	-	-	-	-	-	IPR001357;IPR022047	Y	MCPH1	9606 [Organism: human] [Scientific Name: Homo sapiens]	Y	18	2WT8-B	-	-	-	-	-	-	-	-	-
3SZM	B	Q8NEM0	-	-	-	-	-	-	-	-	-	-	-	-	8.2	2.7	89	189	13	MOLECULE: MICROCEPHALIN;	-	-	-	-	-	-	-	-	-	-	-	-	-	IPR001357;IPR022047	Y	MCPH1	9606 [Organism: human] [Scientific Name: Homo sapiens]	Y	18	2WT8-B	-	-	-	-	-	-	-	-	-
3SZM	B	Q8NEM0	-	-	-	-	-	-	-	-	-	-	-	-	8.2	2.7	89	189	13	MOLECULE: MICROCEPHALIN;	-	-	-	-	-	-	-	-	-	-	-	-	-	IPR001357;IPR022047	Y	MCPH1	9606 [Organism: human] [Scientific Name: Homo sapiens]	Y	18	2WT8-B	-	-	-	-	-	-	-	-	-
3SZM	B	Q8NEM0	-	-	-	-	-	-	-	-	-	-	-	-	8.2	2.7	89	189	13	MOLECULE: MICROCEPHALIN;	-	-	-	-	-	-	-	-	-	-	-	-	-	IPR001357;IPR022047	Y	MCPH1	9606 [Organism: human] [Scientific Name: Homo sapiens]	Y	18	2WT8-B	-	-	-	-	-	-	-	-	-
3SZM	B	Q8NEM0	-	-	-	-	-	-	-	-	-	-	-	-	8.2	2.7	89	189	13	MOLECULE: MICROCEPHALIN;	-	-	-	-	-	-	-	-	-	-	-	-	-	IPR001357;IPR022047	Y	MCPH1	9606 [Organism: human] [Scientific Name: Homo sapiens]	Y	18	2WT8-B	-	-	-	-	-	-	-	-	-
3SZM	B	Q8NEM0	-	-	-	-	-	-	-	-	-	-	-	-	8.2	2.7	89	189	13	MOLECULE: MICROCEPHALIN;	-	-	-	-	-	-	-	-	-	-	-	-	-	IPR001357;IPR022047	Y	MCPH1	9606 [Organism: human] [Scientific Name: Homo sapiens]	Y	18	2WT8-B	-	-	-	-	-	-	-	-	-
3SZM	B	Q8NEM0	-	-	-	-	-	-	-	-	-	-	-	-	8.2	2.7	89	189	13	MOLECULE: MICROCEPHALIN;	-	-	-	-	-	-	-	-	-	-	-	-	-	IPR001357;IPR022047	Y	MCPH1	9606 [Organism: human] [Scientific Name: Homo sapiens]	Y	18	2WT8-B	-	-	-	-	-	-	-	-	-
3SZM	B	Q8NEM0	-	-	-	-	-	-	-	-	-	-	-	-	8.2	2.7	89	189	13	MOLECULE: MICROCEPHALIN;	-	-	-	-	-	-	-	-	-	-	-	-	-	IPR001357;IPR022047	Y	MCPH1	9606 [Organism: human] [Scientific Name: Homo sapiens]	Y	18	2WT8-B	-	-	-	-	-	-	-	-	-
3SZM	B	Q8NEM0	-	-	-	-	-	-	-	-	-	-	-	-	8.2	2.7	89	189	13	MOLECULE: MICROCEPHALIN;	-	-	-	-	-	-	-	-	-	-	-	-	-	IPR001357;IPR022047	Y	MCPH1	9606 [Organism: human] [Scientific Name: Homo sapiens]	Y	18	2WT8-B	-	-	-	-	-	-	-	-	-
3SZM	B	Q8NEM0	-	-	-	-	-	-	-	-	-	-	-	-	8.2	2.7	89	189	13	MOLECULE: MICROCEPHALIN;	-	-	-	-	-	-	-	-	-	-	-	-	-	IPR001357;IPR022047	Y	MCPH1	9606 [Organism: human] [Scientific Name: Homo sapiens]	Y	18	2WT8-B	-	-	-	-	-	-	-	-	-
3SZM	B	Q8NEM0	-	-	-	-	-	-	-	-	-	-	-	-	8.2	2.7	89	189	13	MOLECULE: MICROCEPHALIN;	-	-	-	-	-	-	-	-	-	-	-	-	-	IPR001357;IPR022047	Y	MCPH1	9606 [Organism: human] [Scientific Name: Homo sapiens]	Y	18	2WT8-B	-	-	-	-	-	-	-	-	-
3SZM	B	Q8NEM0	-	-	-	-	-	-	-	-	-	-	-	-	8.2	2.7	89	189	13	MOLECULE: MICROCEPHALIN;	-	-	-	-	-	-	-	-	-	-	-	-	-	IPR001357;IPR022047	Y	MCPH1	9606 [Organism: human] [Scientific Name: Homo sapiens]	Y	18	2WT8-B	-	-	-	-	-	-	-	-	-
3SZM	B	Q8NEM0	-	-	-	-	-	-	-	-	-	-	-	-	8.2	2.7	89	189	13	MOLECULE: MICROCEPHALIN;	-	-	-	-	-	-	-	-	-	-	-	-	-	IPR001357;IPR022047	Y	MCPH1	9606 [Organism: human] [Scientific Name: Homo sapiens]	Y	18	2WT8-B	-	-	-	-	-	-	-	-	-
3SZM	B	Q8NEM0	-	-	-	-	-	-	-	-	-	-	-	-	8.2	2.7	89	189	13	MOLECULE: MICROCEPHALIN;	-	-	-	-	-	-	-	-	-	-	-	-	-	IPR001357;IPR022047	Y	MCPH1	9606 [Organism: human] [Scientific Name: Homo sapiens]	Y	14	3U3Z-A01	-	-	-	-	-	-	-	-	-
3SZM	B	Q8NEM0	-	-	-	-	-	-	-	-	-	-	-	-	8.2	2.7	89	189	13	MOLECULE: MICROCEPHALIN;	-	-	-	-	-	-	-	-	-	-	-	-	-	IPR001357;IPR022047	Y	MCPH1	9606 [Organism: human] [Scientific Name: Homo sapiens]	Y	27	3U3Z-A02	-	-	-	-	-	-	-	-	-
3T1N	B	Q8NEM0	-	-	-	-	-	-	-	-	-	-	-	-	8.2	2.8	90	190	13	MOLECULE: MICROCEPHALIN;	-	-	-	-	-	-	-	-	-	-	-	-	-	IPR001357;IPR022047	Y	MCPH1	9606 [Organism: human] [Scientific Name: Homo sapiens]	Y	18	2WT8-B	-	-	-	-	-	-	-	-	-
3T1N	B	Q8NEM0	-	-	-	-	-	-	-	-	-	-	-	-	8.2	2.8	90	190	13	MOLECULE: MICROCEPHALIN;	-	-	-	-	-	-	-	-	-	-	-	-	-	IPR001357;IPR022047	Y	MCPH1	9606 [Organism: human] [Scientific Name: Homo sapiens]	Y	18	2WT8-B	-	-	-	-	-	-	-	-	-
3T1N	B	Q8NEM0	-	-	-	-	-	-	-	-	-	-	-	-	8.2	2.8	90	190	13	MOLECULE: MICROCEPHALIN;	-	-	-	-	-	-	-	-	-	-	-	-	-	IPR001357;IPR022047	Y	MCPH1	9606 [Organism: human] [Scientific Name: Homo sapiens]	Y	18	2WT8-B	-	-	-	-	-	-	-	-	-
3T1N	B	Q8NEM0	-	-	-	-	-	-	-	-	-	-	-	-	8.2	2.8	90	190	13	MOLECULE: MICROCEPHALIN;	-	-	-	-	-	-	-	-	-	-	-	-	-	IPR001357;IPR022047	Y	MCPH1	9606 [Organism: human] [Scientific Name: Homo sapiens]	Y	18	2WT8-B	-	-	-	-	-	-	-	-	-
3T1N	B	Q8NEM0	-	-	-	-	-	-	-	-	-	-	-	-	8.2	2.8	90	190	13	MOLECULE: MICROCEPHALIN;	-	-	-	-	-	-	-	-	-	-	-	-	-	IPR001357;IPR022047	Y	MCPH1	9606 [Organism: human] [Scientific Name: Homo sapiens]	Y	18	2WT8-B	-	-	-	-	-	-	-	-	-
3T1N	B	Q8NEM0	-	-	-	-	-	-	-	-	-	-	-	-	8.2	2.8	90	190	13	MOLECULE: MICROCEPHALIN;	-	-	-	-	-	-	-	-	-	-	-	-	-	IPR001357;IPR022047	Y	MCPH1	9606 [Organism: human] [Scientific Name: Homo sapiens]	Y	18	2WT8-B	-	-	-	-	-	-	-	-	-
3T1N	B	Q8NEM0	-	-	-	-	-	-	-	-	-	-	-	-	8.2	2.8	90	190	13	MOLECULE: MICROCEPHALIN;	-	-	-	-	-	-	-	-	-	-	-	-	-	IPR001357;IPR022047	Y	MCPH1	9606 [Organism: human] [Scientific Name: Homo sapiens]	Y	18	2WT8-B	-	-	-	-	-	-	-	-	-
3T1N	B	Q8NEM0	-	-	-	-	-	-	-	-	-	-	-	-	8.2	2.8	90	190	13	MOLECULE: MICROCEPHALIN;	-	-	-	-	-	-	-	-	-	-	-	-	-	IPR001357;IPR022047	Y	MCPH1	9606 [Organism: human] [Scientific Name: Homo sapiens]	Y	18	2WT8-B	-	-	-	-	-	-	-	-	-
3T1N	B	Q8NEM0	-	-	-	-	-	-	-	-	-	-	-	-	8.2	2.8	90	190	13	MOLECULE: MICROCEPHALIN;	-	-	-	-	-	-	-	-	-	-	-	-	-	IPR001357;IPR022047	Y	MCPH1	9606 [Organism: human] [Scientific Name: Homo sapiens]	Y	18	2WT8-B	-	-	-	-	-	-	-	-	-
3T1N	B	Q8NEM0	-	-	-	-	-	-	-	-	-	-	-	-	8.2	2.8	90	190	13	MOLECULE: MICROCEPHALIN;	-	-	-	-	-	-	-	-	-	-	-	-	-	IPR001357;IPR022047	Y	MCPH1	9606 [Organism: human] [Scientific Name: Homo sapiens]	Y	18	2WT8-B	-	-	-	-	-	-	-	-	-
3T1N	B	Q8NEM0	-	-	-	-	-	-	-	-	-	-	-	-	8.2	2.8	90	190	13	MOLECULE: MICROCEPHALIN;	-	-	-	-	-	-	-	-	-	-	-	-	-	IPR001357;IPR022047	Y	MCPH1	9606 [Organism: human] [Scientific Name: Homo sapiens]	Y	18	2WT8-B	-	-	-	-	-	-	-	-	-
3T1N	B	Q8NEM0	-	-	-	-	-	-	-	-	-	-	-	-	8.2	2.8	90	190	13	MOLECULE: MICROCEPHALIN;	-	-	-	-	-	-	-	-	-	-	-	-	-	IPR001357;IPR022047	Y	MCPH1	9606 [Organism: human] [Scientific Name: Homo sapiens]	Y	18	2WT8-B	-	-	-	-	-	-	-	-	-
3T1N	B	Q8NEM0	-	-	-	-	-	-	-	-	-	-	-	-	8.2	2.8	90	190	13	MOLECULE: MICROCEPHALIN;	-	-	-	-	-	-	-	-	-	-	-	-	-	IPR001357;IPR022047	Y	MCPH1	9606 [Organism: human] [Scientific Name: Homo sapiens]	Y	18	2WT8-B	-	-	-	-	-	-	-	-	-
3T1N	B	Q8NEM0	-	-	-	-	-	-	-	-	-	-	-	-	8.2	2.8	90	190	13	MOLECULE: MICROCEPHALIN;	-	-	-	-	-	-	-	-	-	-	-	-	-	IPR001357;IPR022047	Y	MCPH1	9606 [Organism: human] [Scientific Name: Homo sapiens]	Y	18	2WT8-B	-	-	-	-	-	-	-	-	-
3T1N	B	Q8NEM0	-	-	-	-	-	-	-	-	-	-	-	-	8.2	2.8	90	190	13	MOLECULE: MICROCEPHALIN;	-	-	-	-	-	-	-	-	-	-	-	-	-	IPR001357;IPR022047	Y	MCPH1	9606 [Organism: human] [Scientific Name: Homo sapiens]	Y	18	2WT8-B	-	-	-	-	-	-	-	-	-
3T1N	B	Q8NEM0	-	-	-	-	-	-	-	-	-	-	-	-	8.2	2.8	90	190	13	MOLECULE: MICROCEPHALIN;	-	-	-	-	-	-	-	-	-	-	-	-	-	IPR001357;IPR022047	Y	MCPH1	9606 [Organism: human] [Scientific Name: Homo sapiens]	Y	18	2WT8-B	-	-	-	-	-	-	-	-	-
3T1N	B	Q8NEM0	-	-	-	-	-	-	-	-	-	-	-	-	8.2	2.8	90	190	13	MOLECULE: MICROCEPHALIN;	-	-	-	-	-	-	-	-	-	-	-	-	-	IPR001357;IPR022047	Y	MCPH1	9606 [Organism: human] [Scientific Name: Homo sapiens]	Y	18	2WT8-B	-	-	-	-	-	-	-	-	-
3T1N	B	Q8NEM0	-	-	-	-	-	-	-	-	-	-	-	-	8.2	2.8	90	190	13	MOLECULE: MICROCEPHALIN;	-	-	-	-	-	-	-	-	-	-	-	-	-	IPR001357;IPR022047	Y	MCPH1	9606 [Organism: human] [Scientific Name: Homo sapiens]	Y	18	2WT8-B	-	-	-	-	-	-	-	-	-
3T1N	B	Q8NEM0	-	-	-	-	-	-	-	-	-	-	-	-	8.2	2.8	90	190	13	MOLECULE: MICROCEPHALIN;	-	-	-	-	-	-	-	-	-	-	-	-	-	IPR001357;IPR022047	Y	MCPH1	9606 [Organism: human] [Scientific Name: Homo sapiens]	Y	18	2WT8-B	-	-	-	-	-	-	-	-	-
3T1N	B	Q8NEM0	-	-	-	-	-	-	-	-	-	-	-	-	8.2	2.8	90	190	13	MOLECULE: MICROCEPHALIN;	-	-	-	-	-	-	-	-	-	-	-	-	-	IPR001357;IPR022047	Y	MCPH1	9606 [Organism: human] [Scientific Name: Homo sapiens]	Y	18	2WT8-B	-	-	-	-	-	-	-	-	-
3T1N	B	Q8NEM0	-	-	-	-	-	-	-	-	-	-	-	-	8.2	2.8	90	190	13	MOLECULE: MICROCEPHALIN;	-	-	-	-	-	-	-	-	-	-	-	-	-	IPR001357;IPR022047	Y	MCPH1	9606 [Organism: human] [Scientific Name: Homo sapiens]	Y	18	2WT8-B	-	-	-	-	-	-	-	-	-
3T1N	B	Q8NEM0	-	-	-	-	-	-	-	-	-	-	-	-	8.2	2.8	90	190	13	MOLECULE: MICROCEPHALIN;	-	-	-	-	-	-	-	-	-	-	-	-	-	IPR001357;IPR022047	Y	MCPH1	9606 [Organism: human] [Scientific Name: Homo sapiens]	Y	18	2WT8-B	-	-	-	-	-	-	-	-	-
3T1N	B	Q8NEM0	-	-	-	-	-	-	-	-	-	-	-	-	8.2	2.8	90	190	13	MOLECULE: MICROCEPHALIN;	-	-	-	-	-	-	-	-	-	-	-	-	-	IPR001357;IPR022047	Y	MCPH1	9606 [Organism: human] [Scientific Name: Homo sapiens]	Y	18	2WT8-B	-	-	-	-	-	-	-	-	-
3T1N	B	Q8NEM0	-	-	-	-	-	-	-	-	-	-	-	-	8.2	2.8	90	190	13	MOLECULE: MICROCEPHALIN;	-	-	-	-	-	-	-	-	-	-	-	-	-	IPR001357;IPR022047	Y	MCPH1	9606 [Organism: human] [Scientific Name: Homo sapiens]	Y	18	2WT8-B	-	-	-	-	-	-	-	-	-
3T1N	B	Q8NEM0	-	-	-	-	-	-	-	-	-	-	-	-	8.2	2.8	90	190	13	MOLECULE: MICROCEPHALIN;	-	-	-	-	-	-	-	-	-	-	-	-	-	IPR001357;IPR022047	Y	MCPH1	9606 [Organism: human] [Scientific Name: Homo sapiens]	Y	18	2WT8-B	-	-	-	-	-	-	-	-	-
3T1N	B	Q8NEM0	-	-	-	-	-	-	-	-	-	-	-	-	8.2	2.8	90	190	13	MOLECULE: MICROCEPHALIN;	-	-	-	-	-	-	-	-	-	-	-	-	-	IPR001357;IPR022047	Y	MCPH1	9606 [Organism: human] [Scientific Name: Homo sapiens]	Y	18	2WT8-B	-	-	-	-	-	-	-	-	-
3T1N	B	Q8NEM0	-	-	-	-	-	-	-	-	-	-	-	-	8.2	2.8	90	190	13	MOLECULE: MICROCEPHALIN;	-	-	-	-	-	-	-	-	-	-	-	-	-	IPR001357;IPR022047	Y	MCPH1	9606 [Organism: human] [Scientific Name: Homo sapiens]	Y	18	2WT8-B	-	-	-	-	-	-	-	-	-
3T1N	B	Q8NEM0	-	-	-	-	-	-	-	-	-	-	-	-	8.2	2.8	90	190	13	MOLECULE: MICROCEPHALIN;	-	-	-	-	-	-	-	-	-	-	-	-	-	IPR001357;IPR022047	Y	MCPH1	9606 [Organism: human] [Scientific Name: Homo sapiens]	Y	18	2WT8-B	-	-	-	-	-	-	-	-	-
3T1N	B	Q8NEM0	-	-	-	-	-	-	-	-	-	-	-	-	8.2	2.8	90	190	13	MOLECULE: MICROCEPHALIN;	-	-	-	-	-	-	-	-	-	-	-	-	-	IPR001357;IPR022047	Y	MCPH1	9606 [Organism: human] [Scientific Name: Homo sapiens]	Y	18	2WT8-B	-	-	-	-	-	-	-	-	-
3T1N	B	Q8NEM0	-	-	-	-	-	-	-	-	-	-	-	-	8.2	2.8	90	190	13	MOLECULE: MICROCEPHALIN;	-	-	-	-	-	-	-	-	-	-	-	-	-	IPR001357;IPR022047	Y	MCPH1	9606 [Organism: human] [Scientific Name: Homo sapiens]	Y	18	2WT8-B	-	-	-	-	-	-	-	-	-
3T1N	B	Q8NEM0	-	-	-	-	-	-	-	-	-	-	-	-	8.2	2.8	90	190	13	MOLECULE: MICROCEPHALIN;	-	-	-	-	-	-	-	-	-	-	-	-	-	IPR001357;IPR022047	Y	MCPH1	9606 [Organism: human] [Scientific Name: Homo sapiens]	Y	14	3U3Z-A01	-	-	-	-	-	-	-	-	-
3T1N	B	Q8NEM0	-	-	-	-	-	-	-	-	-	-	-	-	8.2	2.8	90	190	13	MOLECULE: MICROCEPHALIN;	-	-	-	-	-	-	-	-	-	-	-	-	-	IPR001357;IPR022047	Y	MCPH1	9606 [Organism: human] [Scientific Name: Homo sapiens]	Y	27	3U3Z-A02	-	-	-	-	-	-	-	-	-
3SZM	G	Q8NEM0	-	-	-	-	-	-	-	-	-	-	-	-	8.2	2.7	89	191	13	MOLECULE: MICROCEPHALIN;	-	-	-	-	-	-	-	-	-	-	-	-	-	IPR001357;IPR022047	Y	MCPH1	9606 [Organism: human] [Scientific Name: Homo sapiens]	Y	18	2WT8-B	-	-	-	-	-	-	-	-	-
3SZM	G	Q8NEM0	-	-	-	-	-	-	-	-	-	-	-	-	8.2	2.7	89	191	13	MOLECULE: MICROCEPHALIN;	-	-	-	-	-	-	-	-	-	-	-	-	-	IPR001357;IPR022047	Y	MCPH1	9606 [Organism: human] [Scientific Name: Homo sapiens]	Y	18	2WT8-B	-	-	-	-	-	-	-	-	-
3SZM	G	Q8NEM0	-	-	-	-	-	-	-	-	-	-	-	-	8.2	2.7	89	191	13	MOLECULE: MICROCEPHALIN;	-	-	-	-	-	-	-	-	-	-	-	-	-	IPR001357;IPR022047	Y	MCPH1	9606 [Organism: human] [Scientific Name: Homo sapiens]	Y	18	2WT8-B	-	-	-	-	-	-	-	-	-
3SZM	G	Q8NEM0	-	-	-	-	-	-	-	-	-	-	-	-	8.2	2.7	89	191	13	MOLECULE: MICROCEPHALIN;	-	-	-	-	-	-	-	-	-	-	-	-	-	IPR001357;IPR022047	Y	MCPH1	9606 [Organism: human] [Scientific Name: Homo sapiens]	Y	18	2WT8-B	-	-	-	-	-	-	-	-	-
3SZM	G	Q8NEM0	-	-	-	-	-	-	-	-	-	-	-	-	8.2	2.7	89	191	13	MOLECULE: MICROCEPHALIN;	-	-	-	-	-	-	-	-	-	-	-	-	-	IPR001357;IPR022047	Y	MCPH1	9606 [Organism: human] [Scientific Name: Homo sapiens]	Y	18	2WT8-B	-	-	-	-	-	-	-	-	-
3SZM	G	Q8NEM0	-	-	-	-	-	-	-	-	-	-	-	-	8.2	2.7	89	191	13	MOLECULE: MICROCEPHALIN;	-	-	-	-	-	-	-	-	-	-	-	-	-	IPR001357;IPR022047	Y	MCPH1	9606 [Organism: human] [Scientific Name: Homo sapiens]	Y	18	2WT8-B	-	-	-	-	-	-	-	-	-
3SZM	G	Q8NEM0	-	-	-	-	-	-	-	-	-	-	-	-	8.2	2.7	89	191	13	MOLECULE: MICROCEPHALIN;	-	-	-	-	-	-	-	-	-	-	-	-	-	IPR001357;IPR022047	Y	MCPH1	9606 [Organism: human] [Scientific Name: Homo sapiens]	Y	18	2WT8-B	-	-	-	-	-	-	-	-	-
3SZM	G	Q8NEM0	-	-	-	-	-	-	-	-	-	-	-	-	8.2	2.7	89	191	13	MOLECULE: MICROCEPHALIN;	-	-	-	-	-	-	-	-	-	-	-	-	-	IPR001357;IPR022047	Y	MCPH1	9606 [Organism: human] [Scientific Name: Homo sapiens]	Y	18	2WT8-B	-	-	-	-	-	-	-	-	-
3SZM	G	Q8NEM0	-	-	-	-	-	-	-	-	-	-	-	-	8.2	2.7	89	191	13	MOLECULE: MICROCEPHALIN;	-	-	-	-	-	-	-	-	-	-	-	-	-	IPR001357;IPR022047	Y	MCPH1	9606 [Organism: human] [Scientific Name: Homo sapiens]	Y	18	2WT8-B	-	-	-	-	-	-	-	-	-
3SZM	G	Q8NEM0	-	-	-	-	-	-	-	-	-	-	-	-	8.2	2.7	89	191	13	MOLECULE: MICROCEPHALIN;	-	-	-	-	-	-	-	-	-	-	-	-	-	IPR001357;IPR022047	Y	MCPH1	9606 [Organism: human] [Scientific Name: Homo sapiens]	Y	18	2WT8-B	-	-	-	-	-	-	-	-	-
3SZM	G	Q8NEM0	-	-	-	-	-	-	-	-	-	-	-	-	8.2	2.7	89	191	13	MOLECULE: MICROCEPHALIN;	-	-	-	-	-	-	-	-	-	-	-	-	-	IPR001357;IPR022047	Y	MCPH1	9606 [Organism: human] [Scientific Name: Homo sapiens]	Y	18	2WT8-B	-	-	-	-	-	-	-	-	-
3SZM	G	Q8NEM0	-	-	-	-	-	-	-	-	-	-	-	-	8.2	2.7	89	191	13	MOLECULE: MICROCEPHALIN;	-	-	-	-	-	-	-	-	-	-	-	-	-	IPR001357;IPR022047	Y	MCPH1	9606 [Organism: human] [Scientific Name: Homo sapiens]	Y	18	2WT8-B	-	-	-	-	-	-	-	-	-
3SZM	G	Q8NEM0	-	-	-	-	-	-	-	-	-	-	-	-	8.2	2.7	89	191	13	MOLECULE: MICROCEPHALIN;	-	-	-	-	-	-	-	-	-	-	-	-	-	IPR001357;IPR022047	Y	MCPH1	9606 [Organism: human] [Scientific Name: Homo sapiens]	Y	18	2WT8-B	-	-	-	-	-	-	-	-	-
3SZM	G	Q8NEM0	-	-	-	-	-	-	-	-	-	-	-	-	8.2	2.7	89	191	13	MOLECULE: MICROCEPHALIN;	-	-	-	-	-	-	-	-	-	-	-	-	-	IPR001357;IPR022047	Y	MCPH1	9606 [Organism: human] [Scientific Name: Homo sapiens]	Y	18	2WT8-B	-	-	-	-	-	-	-	-	-
3SZM	G	Q8NEM0	-	-	-	-	-	-	-	-	-	-	-	-	8.2	2.7	89	191	13	MOLECULE: MICROCEPHALIN;	-	-	-	-	-	-	-	-	-	-	-	-	-	IPR001357;IPR022047	Y	MCPH1	9606 [Organism: human] [Scientific Name: Homo sapiens]	Y	18	2WT8-B	-	-	-	-	-	-	-	-	-
3SZM	G	Q8NEM0	-	-	-	-	-	-	-	-	-	-	-	-	8.2	2.7	89	191	13	MOLECULE: MICROCEPHALIN;	-	-	-	-	-	-	-	-	-	-	-	-	-	IPR001357;IPR022047	Y	MCPH1	9606 [Organism: human] [Scientific Name: Homo sapiens]	Y	18	2WT8-B	-	-	-	-	-	-	-	-	-
3SZM	G	Q8NEM0	-	-	-	-	-	-	-	-	-	-	-	-	8.2	2.7	89	191	13	MOLECULE: MICROCEPHALIN;	-	-	-	-	-	-	-	-	-	-	-	-	-	IPR001357;IPR022047	Y	MCPH1	9606 [Organism: human] [Scientific Name: Homo sapiens]	Y	18	2WT8-B	-	-	-	-	-	-	-	-	-
3SZM	G	Q8NEM0	-	-	-	-	-	-	-	-	-	-	-	-	8.2	2.7	89	191	13	MOLECULE: MICROCEPHALIN;	-	-	-	-	-	-	-	-	-	-	-	-	-	IPR001357;IPR022047	Y	MCPH1	9606 [Organism: human] [Scientific Name: Homo sapiens]	Y	18	2WT8-B	-	-	-	-	-	-	-	-	-
3SZM	G	Q8NEM0	-	-	-	-	-	-	-	-	-	-	-	-	8.2	2.7	89	191	13	MOLECULE: MICROCEPHALIN;	-	-	-	-	-	-	-	-	-	-	-	-	-	IPR001357;IPR022047	Y	MCPH1	9606 [Organism: human] [Scientific Name: Homo sapiens]	Y	18	2WT8-B	-	-	-	-	-	-	-	-	-
3SZM	G	Q8NEM0	-	-	-	-	-	-	-	-	-	-	-	-	8.2	2.7	89	191	13	MOLECULE: MICROCEPHALIN;	-	-	-	-	-	-	-	-	-	-	-	-	-	IPR001357;IPR022047	Y	MCPH1	9606 [Organism: human] [Scientific Name: Homo sapiens]	Y	18	2WT8-B	-	-	-	-	-	-	-	-	-
3SZM	G	Q8NEM0	-	-	-	-	-	-	-	-	-	-	-	-	8.2	2.7	89	191	13	MOLECULE: MICROCEPHALIN;	-	-	-	-	-	-	-	-	-	-	-	-	-	IPR001357;IPR022047	Y	MCPH1	9606 [Organism: human] [Scientific Name: Homo sapiens]	Y	18	2WT8-B	-	-	-	-	-	-	-	-	-
3SZM	G	Q8NEM0	-	-	-	-	-	-	-	-	-	-	-	-	8.2	2.7	89	191	13	MOLECULE: MICROCEPHALIN;	-	-	-	-	-	-	-	-	-	-	-	-	-	IPR001357;IPR022047	Y	MCPH1	9606 [Organism: human] [Scientific Name: Homo sapiens]	Y	18	2WT8-B	-	-	-	-	-	-	-	-	-
3SZM	G	Q8NEM0	-	-	-	-	-	-	-	-	-	-	-	-	8.2	2.7	89	191	13	MOLECULE: MICROCEPHALIN;	-	-	-	-	-	-	-	-	-	-	-	-	-	IPR001357;IPR022047	Y	MCPH1	9606 [Organism: human] [Scientific Name: Homo sapiens]	Y	18	2WT8-B	-	-	-	-	-	-	-	-	-
3SZM	G	Q8NEM0	-	-	-	-	-	-	-	-	-	-	-	-	8.2	2.7	89	191	13	MOLECULE: MICROCEPHALIN;	-	-	-	-	-	-	-	-	-	-	-	-	-	IPR001357;IPR022047	Y	MCPH1	9606 [Organism: human] [Scientific Name: Homo sapiens]	Y	18	2WT8-B	-	-	-	-	-	-	-	-	-
3SZM	G	Q8NEM0	-	-	-	-	-	-	-	-	-	-	-	-	8.2	2.7	89	191	13	MOLECULE: MICROCEPHALIN;	-	-	-	-	-	-	-	-	-	-	-	-	-	IPR001357;IPR022047	Y	MCPH1	9606 [Organism: human] [Scientific Name: Homo sapiens]	Y	18	2WT8-B	-	-	-	-	-	-	-	-	-
3SZM	G	Q8NEM0	-	-	-	-	-	-	-	-	-	-	-	-	8.2	2.7	89	191	13	MOLECULE: MICROCEPHALIN;	-	-	-	-	-	-	-	-	-	-	-	-	-	IPR001357;IPR022047	Y	MCPH1	9606 [Organism: human] [Scientific Name: Homo sapiens]	Y	18	2WT8-B	-	-	-	-	-	-	-	-	-
3SZM	G	Q8NEM0	-	-	-	-	-	-	-	-	-	-	-	-	8.2	2.7	89	191	13	MOLECULE: MICROCEPHALIN;	-	-	-	-	-	-	-	-	-	-	-	-	-	IPR001357;IPR022047	Y	MCPH1	9606 [Organism: human] [Scientific Name: Homo sapiens]	Y	18	2WT8-B	-	-	-	-	-	-	-	-	-
3SZM	G	Q8NEM0	-	-	-	-	-	-	-	-	-	-	-	-	8.2	2.7	89	191	13	MOLECULE: MICROCEPHALIN;	-	-	-	-	-	-	-	-	-	-	-	-	-	IPR001357;IPR022047	Y	MCPH1	9606 [Organism: human] [Scientific Name: Homo sapiens]	Y	18	2WT8-B	-	-	-	-	-	-	-	-	-
3SZM	G	Q8NEM0	-	-	-	-	-	-	-	-	-	-	-	-	8.2	2.7	89	191	13	MOLECULE: MICROCEPHALIN;	-	-	-	-	-	-	-	-	-	-	-	-	-	IPR001357;IPR022047	Y	MCPH1	9606 [Organism: human] [Scientific Name: Homo sapiens]	Y	18	2WT8-B	-	-	-	-	-	-	-	-	-
3SZM	G	Q8NEM0	-	-	-	-	-	-	-	-	-	-	-	-	8.2	2.7	89	191	13	MOLECULE: MICROCEPHALIN;	-	-	-	-	-	-	-	-	-	-	-	-	-	IPR001357;IPR022047	Y	MCPH1	9606 [Organism: human] [Scientific Name: Homo sapiens]	Y	18	2WT8-B	-	-	-	-	-	-	-	-	-
3SZM	G	Q8NEM0	-	-	-	-	-	-	-	-	-	-	-	-	8.2	2.7	89	191	13	MOLECULE: MICROCEPHALIN;	-	-	-	-	-	-	-	-	-	-	-	-	-	IPR001357;IPR022047	Y	MCPH1	9606 [Organism: human] [Scientific Name: Homo sapiens]	Y	14	3U3Z-A01	-	-	-	-	-	-	-	-	-
3SZM	G	Q8NEM0	-	-	-	-	-	-	-	-	-	-	-	-	8.2	2.7	89	191	13	MOLECULE: MICROCEPHALIN;	-	-	-	-	-	-	-	-	-	-	-	-	-	IPR001357;IPR022047	Y	MCPH1	9606 [Organism: human] [Scientific Name: Homo sapiens]	Y	27	3U3Z-A02	-	-	-	-	-	-	-	-	-
3SZM	D	Q8NEM0	-	-	-	-	-	-	-	-	-	-	-	-	8.2	2.6	89	189	13	MOLECULE: MICROCEPHALIN;	-	-	-	-	-	-	-	-	-	-	-	-	-	IPR001357;IPR022047	Y	MCPH1	9606 [Organism: human] [Scientific Name: Homo sapiens]	Y	18	2WT8-B	-	-	-	-	-	-	-	-	-
3SZM	D	Q8NEM0	-	-	-	-	-	-	-	-	-	-	-	-	8.2	2.6	89	189	13	MOLECULE: MICROCEPHALIN;	-	-	-	-	-	-	-	-	-	-	-	-	-	IPR001357;IPR022047	Y	MCPH1	9606 [Organism: human] [Scientific Name: Homo sapiens]	Y	18	2WT8-B	-	-	-	-	-	-	-	-	-
3SZM	D	Q8NEM0	-	-	-	-	-	-	-	-	-	-	-	-	8.2	2.6	89	189	13	MOLECULE: MICROCEPHALIN;	-	-	-	-	-	-	-	-	-	-	-	-	-	IPR001357;IPR022047	Y	MCPH1	9606 [Organism: human] [Scientific Name: Homo sapiens]	Y	18	2WT8-B	-	-	-	-	-	-	-	-	-
3SZM	D	Q8NEM0	-	-	-	-	-	-	-	-	-	-	-	-	8.2	2.6	89	189	13	MOLECULE: MICROCEPHALIN;	-	-	-	-	-	-	-	-	-	-	-	-	-	IPR001357;IPR022047	Y	MCPH1	9606 [Organism: human] [Scientific Name: Homo sapiens]	Y	18	2WT8-B	-	-	-	-	-	-	-	-	-
3SZM	D	Q8NEM0	-	-	-	-	-	-	-	-	-	-	-	-	8.2	2.6	89	189	13	MOLECULE: MICROCEPHALIN;	-	-	-	-	-	-	-	-	-	-	-	-	-	IPR001357;IPR022047	Y	MCPH1	9606 [Organism: human] [Scientific Name: Homo sapiens]	Y	18	2WT8-B	-	-	-	-	-	-	-	-	-
3SZM	D	Q8NEM0	-	-	-	-	-	-	-	-	-	-	-	-	8.2	2.6	89	189	13	MOLECULE: MICROCEPHALIN;	-	-	-	-	-	-	-	-	-	-	-	-	-	IPR001357;IPR022047	Y	MCPH1	9606 [Organism: human] [Scientific Name: Homo sapiens]	Y	18	2WT8-B	-	-	-	-	-	-	-	-	-
3SZM	D	Q8NEM0	-	-	-	-	-	-	-	-	-	-	-	-	8.2	2.6	89	189	13	MOLECULE: MICROCEPHALIN;	-	-	-	-	-	-	-	-	-	-	-	-	-	IPR001357;IPR022047	Y	MCPH1	9606 [Organism: human] [Scientific Name: Homo sapiens]	Y	18	2WT8-B	-	-	-	-	-	-	-	-	-
3SZM	D	Q8NEM0	-	-	-	-	-	-	-	-	-	-	-	-	8.2	2.6	89	189	13	MOLECULE: MICROCEPHALIN;	-	-	-	-	-	-	-	-	-	-	-	-	-	IPR001357;IPR022047	Y	MCPH1	9606 [Organism: human] [Scientific Name: Homo sapiens]	Y	18	2WT8-B	-	-	-	-	-	-	-	-	-
3SZM	D	Q8NEM0	-	-	-	-	-	-	-	-	-	-	-	-	8.2	2.6	89	189	13	MOLECULE: MICROCEPHALIN;	-	-	-	-	-	-	-	-	-	-	-	-	-	IPR001357;IPR022047	Y	MCPH1	9606 [Organism: human] [Scientific Name: Homo sapiens]	Y	18	2WT8-B	-	-	-	-	-	-	-	-	-
3SZM	D	Q8NEM0	-	-	-	-	-	-	-	-	-	-	-	-	8.2	2.6	89	189	13	MOLECULE: MICROCEPHALIN;	-	-	-	-	-	-	-	-	-	-	-	-	-	IPR001357;IPR022047	Y	MCPH1	9606 [Organism: human] [Scientific Name: Homo sapiens]	Y	18	2WT8-B	-	-	-	-	-	-	-	-	-
3SZM	D	Q8NEM0	-	-	-	-	-	-	-	-	-	-	-	-	8.2	2.6	89	189	13	MOLECULE: MICROCEPHALIN;	-	-	-	-	-	-	-	-	-	-	-	-	-	IPR001357;IPR022047	Y	MCPH1	9606 [Organism: human] [Scientific Name: Homo sapiens]	Y	18	2WT8-B	-	-	-	-	-	-	-	-	-
3SZM	D	Q8NEM0	-	-	-	-	-	-	-	-	-	-	-	-	8.2	2.6	89	189	13	MOLECULE: MICROCEPHALIN;	-	-	-	-	-	-	-	-	-	-	-	-	-	IPR001357;IPR022047	Y	MCPH1	9606 [Organism: human] [Scientific Name: Homo sapiens]	Y	18	2WT8-B	-	-	-	-	-	-	-	-	-
3SZM	D	Q8NEM0	-	-	-	-	-	-	-	-	-	-	-	-	8.2	2.6	89	189	13	MOLECULE: MICROCEPHALIN;	-	-	-	-	-	-	-	-	-	-	-	-	-	IPR001357;IPR022047	Y	MCPH1	9606 [Organism: human] [Scientific Name: Homo sapiens]	Y	18	2WT8-B	-	-	-	-	-	-	-	-	-
3SZM	D	Q8NEM0	-	-	-	-	-	-	-	-	-	-	-	-	8.2	2.6	89	189	13	MOLECULE: MICROCEPHALIN;	-	-	-	-	-	-	-	-	-	-	-	-	-	IPR001357;IPR022047	Y	MCPH1	9606 [Organism: human] [Scientific Name: Homo sapiens]	Y	18	2WT8-B	-	-	-	-	-	-	-	-	-
3SZM	D	Q8NEM0	-	-	-	-	-	-	-	-	-	-	-	-	8.2	2.6	89	189	13	MOLECULE: MICROCEPHALIN;	-	-	-	-	-	-	-	-	-	-	-	-	-	IPR001357;IPR022047	Y	MCPH1	9606 [Organism: human] [Scientific Name: Homo sapiens]	Y	18	2WT8-B	-	-	-	-	-	-	-	-	-
3SZM	D	Q8NEM0	-	-	-	-	-	-	-	-	-	-	-	-	8.2	2.6	89	189	13	MOLECULE: MICROCEPHALIN;	-	-	-	-	-	-	-	-	-	-	-	-	-	IPR001357;IPR022047	Y	MCPH1	9606 [Organism: human] [Scientific Name: Homo sapiens]	Y	18	2WT8-B	-	-	-	-	-	-	-	-	-
3SZM	D	Q8NEM0	-	-	-	-	-	-	-	-	-	-	-	-	8.2	2.6	89	189	13	MOLECULE: MICROCEPHALIN;	-	-	-	-	-	-	-	-	-	-	-	-	-	IPR001357;IPR022047	Y	MCPH1	9606 [Organism: human] [Scientific Name: Homo sapiens]	Y	18	2WT8-B	-	-	-	-	-	-	-	-	-
3SZM	D	Q8NEM0	-	-	-	-	-	-	-	-	-	-	-	-	8.2	2.6	89	189	13	MOLECULE: MICROCEPHALIN;	-	-	-	-	-	-	-	-	-	-	-	-	-	IPR001357;IPR022047	Y	MCPH1	9606 [Organism: human] [Scientific Name: Homo sapiens]	Y	18	2WT8-B	-	-	-	-	-	-	-	-	-
3SZM	D	Q8NEM0	-	-	-	-	-	-	-	-	-	-	-	-	8.2	2.6	89	189	13	MOLECULE: MICROCEPHALIN;	-	-	-	-	-	-	-	-	-	-	-	-	-	IPR001357;IPR022047	Y	MCPH1	9606 [Organism: human] [Scientific Name: Homo sapiens]	Y	18	2WT8-B	-	-	-	-	-	-	-	-	-
3SZM	D	Q8NEM0	-	-	-	-	-	-	-	-	-	-	-	-	8.2	2.6	89	189	13	MOLECULE: MICROCEPHALIN;	-	-	-	-	-	-	-	-	-	-	-	-	-	IPR001357;IPR022047	Y	MCPH1	9606 [Organism: human] [Scientific Name: Homo sapiens]	Y	18	2WT8-B	-	-	-	-	-	-	-	-	-
3SZM	D	Q8NEM0	-	-	-	-	-	-	-	-	-	-	-	-	8.2	2.6	89	189	13	MOLECULE: MICROCEPHALIN;	-	-	-	-	-	-	-	-	-	-	-	-	-	IPR001357;IPR022047	Y	MCPH1	9606 [Organism: human] [Scientific Name: Homo sapiens]	Y	18	2WT8-B	-	-	-	-	-	-	-	-	-
3SZM	D	Q8NEM0	-	-	-	-	-	-	-	-	-	-	-	-	8.2	2.6	89	189	13	MOLECULE: MICROCEPHALIN;	-	-	-	-	-	-	-	-	-	-	-	-	-	IPR001357;IPR022047	Y	MCPH1	9606 [Organism: human] [Scientific Name: Homo sapiens]	Y	18	2WT8-B	-	-	-	-	-	-	-	-	-
3SZM	D	Q8NEM0	-	-	-	-	-	-	-	-	-	-	-	-	8.2	2.6	89	189	13	MOLECULE: MICROCEPHALIN;	-	-	-	-	-	-	-	-	-	-	-	-	-	IPR001357;IPR022047	Y	MCPH1	9606 [Organism: human] [Scientific Name: Homo sapiens]	Y	18	2WT8-B	-	-	-	-	-	-	-	-	-
3SZM	D	Q8NEM0	-	-	-	-	-	-	-	-	-	-	-	-	8.2	2.6	89	189	13	MOLECULE: MICROCEPHALIN;	-	-	-	-	-	-	-	-	-	-	-	-	-	IPR001357;IPR022047	Y	MCPH1	9606 [Organism: human] [Scientific Name: Homo sapiens]	Y	18	2WT8-B	-	-	-	-	-	-	-	-	-
3SZM	D	Q8NEM0	-	-	-	-	-	-	-	-	-	-	-	-	8.2	2.6	89	189	13	MOLECULE: MICROCEPHALIN;	-	-	-	-	-	-	-	-	-	-	-	-	-	IPR001357;IPR022047	Y	MCPH1	9606 [Organism: human] [Scientific Name: Homo sapiens]	Y	18	2WT8-B	-	-	-	-	-	-	-	-	-
3SZM	D	Q8NEM0	-	-	-	-	-	-	-	-	-	-	-	-	8.2	2.6	89	189	13	MOLECULE: MICROCEPHALIN;	-	-	-	-	-	-	-	-	-	-	-	-	-	IPR001357;IPR022047	Y	MCPH1	9606 [Organism: human] [Scientific Name: Homo sapiens]	Y	18	2WT8-B	-	-	-	-	-	-	-	-	-
3SZM	D	Q8NEM0	-	-	-	-	-	-	-	-	-	-	-	-	8.2	2.6	89	189	13	MOLECULE: MICROCEPHALIN;	-	-	-	-	-	-	-	-	-	-	-	-	-	IPR001357;IPR022047	Y	MCPH1	9606 [Organism: human] [Scientific Name: Homo sapiens]	Y	18	2WT8-B	-	-	-	-	-	-	-	-	-
3SZM	D	Q8NEM0	-	-	-	-	-	-	-	-	-	-	-	-	8.2	2.6	89	189	13	MOLECULE: MICROCEPHALIN;	-	-	-	-	-	-	-	-	-	-	-	-	-	IPR001357;IPR022047	Y	MCPH1	9606 [Organism: human] [Scientific Name: Homo sapiens]	Y	18	2WT8-B	-	-	-	-	-	-	-	-	-
3SZM	D	Q8NEM0	-	-	-	-	-	-	-	-	-	-	-	-	8.2	2.6	89	189	13	MOLECULE: MICROCEPHALIN;	-	-	-	-	-	-	-	-	-	-	-	-	-	IPR001357;IPR022047	Y	MCPH1	9606 [Organism: human] [Scientific Name: Homo sapiens]	Y	18	2WT8-B	-	-	-	-	-	-	-	-	-
3SZM	D	Q8NEM0	-	-	-	-	-	-	-	-	-	-	-	-	8.2	2.6	89	189	13	MOLECULE: MICROCEPHALIN;	-	-	-	-	-	-	-	-	-	-	-	-	-	IPR001357;IPR022047	Y	MCPH1	9606 [Organism: human] [Scientific Name: Homo sapiens]	Y	18	2WT8-B	-	-	-	-	-	-	-	-	-
3SZM	D	Q8NEM0	-	-	-	-	-	-	-	-	-	-	-	-	8.2	2.6	89	189	13	MOLECULE: MICROCEPHALIN;	-	-	-	-	-	-	-	-	-	-	-	-	-	IPR001357;IPR022047	Y	MCPH1	9606 [Organism: human] [Scientific Name: Homo sapiens]	Y	14	3U3Z-A01	-	-	-	-	-	-	-	-	-
3SZM	D	Q8NEM0	-	-	-	-	-	-	-	-	-	-	-	-	8.2	2.6	89	189	13	MOLECULE: MICROCEPHALIN;	-	-	-	-	-	-	-	-	-	-	-	-	-	IPR001357;IPR022047	Y	MCPH1	9606 [Organism: human] [Scientific Name: Homo sapiens]	Y	27	3U3Z-A02	-	-	-	-	-	-	-	-	-
3SZM	E	Q8NEM0	-	-	-	-	-	-	-	-	-	-	-	-	8.1	2.6	88	187	13	MOLECULE: MICROCEPHALIN;	-	-	-	-	-	-	-	-	-	-	-	-	-	IPR001357;IPR022047	Y	MCPH1	9606 [Organism: human] [Scientific Name: Homo sapiens]	Y	18	2WT8-B	-	-	-	-	-	-	-	-	-
3SZM	E	Q8NEM0	-	-	-	-	-	-	-	-	-	-	-	-	8.1	2.6	88	187	13	MOLECULE: MICROCEPHALIN;	-	-	-	-	-	-	-	-	-	-	-	-	-	IPR001357;IPR022047	Y	MCPH1	9606 [Organism: human] [Scientific Name: Homo sapiens]	Y	18	2WT8-B	-	-	-	-	-	-	-	-	-
3SZM	E	Q8NEM0	-	-	-	-	-	-	-	-	-	-	-	-	8.1	2.6	88	187	13	MOLECULE: MICROCEPHALIN;	-	-	-	-	-	-	-	-	-	-	-	-	-	IPR001357;IPR022047	Y	MCPH1	9606 [Organism: human] [Scientific Name: Homo sapiens]	Y	18	2WT8-B	-	-	-	-	-	-	-	-	-
3SZM	E	Q8NEM0	-	-	-	-	-	-	-	-	-	-	-	-	8.1	2.6	88	187	13	MOLECULE: MICROCEPHALIN;	-	-	-	-	-	-	-	-	-	-	-	-	-	IPR001357;IPR022047	Y	MCPH1	9606 [Organism: human] [Scientific Name: Homo sapiens]	Y	18	2WT8-B	-	-	-	-	-	-	-	-	-
3SZM	E	Q8NEM0	-	-	-	-	-	-	-	-	-	-	-	-	8.1	2.6	88	187	13	MOLECULE: MICROCEPHALIN;	-	-	-	-	-	-	-	-	-	-	-	-	-	IPR001357;IPR022047	Y	MCPH1	9606 [Organism: human] [Scientific Name: Homo sapiens]	Y	18	2WT8-B	-	-	-	-	-	-	-	-	-
3SZM	E	Q8NEM0	-	-	-	-	-	-	-	-	-	-	-	-	8.1	2.6	88	187	13	MOLECULE: MICROCEPHALIN;	-	-	-	-	-	-	-	-	-	-	-	-	-	IPR001357;IPR022047	Y	MCPH1	9606 [Organism: human] [Scientific Name: Homo sapiens]	Y	18	2WT8-B	-	-	-	-	-	-	-	-	-
3SZM	E	Q8NEM0	-	-	-	-	-	-	-	-	-	-	-	-	8.1	2.6	88	187	13	MOLECULE: MICROCEPHALIN;	-	-	-	-	-	-	-	-	-	-	-	-	-	IPR001357;IPR022047	Y	MCPH1	9606 [Organism: human] [Scientific Name: Homo sapiens]	Y	18	2WT8-B	-	-	-	-	-	-	-	-	-
3SZM	E	Q8NEM0	-	-	-	-	-	-	-	-	-	-	-	-	8.1	2.6	88	187	13	MOLECULE: MICROCEPHALIN;	-	-	-	-	-	-	-	-	-	-	-	-	-	IPR001357;IPR022047	Y	MCPH1	9606 [Organism: human] [Scientific Name: Homo sapiens]	Y	18	2WT8-B	-	-	-	-	-	-	-	-	-
3SZM	E	Q8NEM0	-	-	-	-	-	-	-	-	-	-	-	-	8.1	2.6	88	187	13	MOLECULE: MICROCEPHALIN;	-	-	-	-	-	-	-	-	-	-	-	-	-	IPR001357;IPR022047	Y	MCPH1	9606 [Organism: human] [Scientific Name: Homo sapiens]	Y	18	2WT8-B	-	-	-	-	-	-	-	-	-
3SZM	E	Q8NEM0	-	-	-	-	-	-	-	-	-	-	-	-	8.1	2.6	88	187	13	MOLECULE: MICROCEPHALIN;	-	-	-	-	-	-	-	-	-	-	-	-	-	IPR001357;IPR022047	Y	MCPH1	9606 [Organism: human] [Scientific Name: Homo sapiens]	Y	18	2WT8-B	-	-	-	-	-	-	-	-	-
3SZM	E	Q8NEM0	-	-	-	-	-	-	-	-	-	-	-	-	8.1	2.6	88	187	13	MOLECULE: MICROCEPHALIN;	-	-	-	-	-	-	-	-	-	-	-	-	-	IPR001357;IPR022047	Y	MCPH1	9606 [Organism: human] [Scientific Name: Homo sapiens]	Y	18	2WT8-B	-	-	-	-	-	-	-	-	-
3SZM	E	Q8NEM0	-	-	-	-	-	-	-	-	-	-	-	-	8.1	2.6	88	187	13	MOLECULE: MICROCEPHALIN;	-	-	-	-	-	-	-	-	-	-	-	-	-	IPR001357;IPR022047	Y	MCPH1	9606 [Organism: human] [Scientific Name: Homo sapiens]	Y	18	2WT8-B	-	-	-	-	-	-	-	-	-
3SZM	E	Q8NEM0	-	-	-	-	-	-	-	-	-	-	-	-	8.1	2.6	88	187	13	MOLECULE: MICROCEPHALIN;	-	-	-	-	-	-	-	-	-	-	-	-	-	IPR001357;IPR022047	Y	MCPH1	9606 [Organism: human] [Scientific Name: Homo sapiens]	Y	18	2WT8-B	-	-	-	-	-	-	-	-	-
3SZM	E	Q8NEM0	-	-	-	-	-	-	-	-	-	-	-	-	8.1	2.6	88	187	13	MOLECULE: MICROCEPHALIN;	-	-	-	-	-	-	-	-	-	-	-	-	-	IPR001357;IPR022047	Y	MCPH1	9606 [Organism: human] [Scientific Name: Homo sapiens]	Y	18	2WT8-B	-	-	-	-	-	-	-	-	-
3SZM	E	Q8NEM0	-	-	-	-	-	-	-	-	-	-	-	-	8.1	2.6	88	187	13	MOLECULE: MICROCEPHALIN;	-	-	-	-	-	-	-	-	-	-	-	-	-	IPR001357;IPR022047	Y	MCPH1	9606 [Organism: human] [Scientific Name: Homo sapiens]	Y	18	2WT8-B	-	-	-	-	-	-	-	-	-
3SZM	E	Q8NEM0	-	-	-	-	-	-	-	-	-	-	-	-	8.1	2.6	88	187	13	MOLECULE: MICROCEPHALIN;	-	-	-	-	-	-	-	-	-	-	-	-	-	IPR001357;IPR022047	Y	MCPH1	9606 [Organism: human] [Scientific Name: Homo sapiens]	Y	18	2WT8-B	-	-	-	-	-	-	-	-	-
3SZM	E	Q8NEM0	-	-	-	-	-	-	-	-	-	-	-	-	8.1	2.6	88	187	13	MOLECULE: MICROCEPHALIN;	-	-	-	-	-	-	-	-	-	-	-	-	-	IPR001357;IPR022047	Y	MCPH1	9606 [Organism: human] [Scientific Name: Homo sapiens]	Y	18	2WT8-B	-	-	-	-	-	-	-	-	-
3SZM	E	Q8NEM0	-	-	-	-	-	-	-	-	-	-	-	-	8.1	2.6	88	187	13	MOLECULE: MICROCEPHALIN;	-	-	-	-	-	-	-	-	-	-	-	-	-	IPR001357;IPR022047	Y	MCPH1	9606 [Organism: human] [Scientific Name: Homo sapiens]	Y	18	2WT8-B	-	-	-	-	-	-	-	-	-
3SZM	E	Q8NEM0	-	-	-	-	-	-	-	-	-	-	-	-	8.1	2.6	88	187	13	MOLECULE: MICROCEPHALIN;	-	-	-	-	-	-	-	-	-	-	-	-	-	IPR001357;IPR022047	Y	MCPH1	9606 [Organism: human] [Scientific Name: Homo sapiens]	Y	18	2WT8-B	-	-	-	-	-	-	-	-	-
3SZM	E	Q8NEM0	-	-	-	-	-	-	-	-	-	-	-	-	8.1	2.6	88	187	13	MOLECULE: MICROCEPHALIN;	-	-	-	-	-	-	-	-	-	-	-	-	-	IPR001357;IPR022047	Y	MCPH1	9606 [Organism: human] [Scientific Name: Homo sapiens]	Y	18	2WT8-B	-	-	-	-	-	-	-	-	-
3SZM	E	Q8NEM0	-	-	-	-	-	-	-	-	-	-	-	-	8.1	2.6	88	187	13	MOLECULE: MICROCEPHALIN;	-	-	-	-	-	-	-	-	-	-	-	-	-	IPR001357;IPR022047	Y	MCPH1	9606 [Organism: human] [Scientific Name: Homo sapiens]	Y	18	2WT8-B	-	-	-	-	-	-	-	-	-
3SZM	E	Q8NEM0	-	-	-	-	-	-	-	-	-	-	-	-	8.1	2.6	88	187	13	MOLECULE: MICROCEPHALIN;	-	-	-	-	-	-	-	-	-	-	-	-	-	IPR001357;IPR022047	Y	MCPH1	9606 [Organism: human] [Scientific Name: Homo sapiens]	Y	18	2WT8-B	-	-	-	-	-	-	-	-	-
3SZM	E	Q8NEM0	-	-	-	-	-	-	-	-	-	-	-	-	8.1	2.6	88	187	13	MOLECULE: MICROCEPHALIN;	-	-	-	-	-	-	-	-	-	-	-	-	-	IPR001357;IPR022047	Y	MCPH1	9606 [Organism: human] [Scientific Name: Homo sapiens]	Y	18	2WT8-B	-	-	-	-	-	-	-	-	-
3SZM	E	Q8NEM0	-	-	-	-	-	-	-	-	-	-	-	-	8.1	2.6	88	187	13	MOLECULE: MICROCEPHALIN;	-	-	-	-	-	-	-	-	-	-	-	-	-	IPR001357;IPR022047	Y	MCPH1	9606 [Organism: human] [Scientific Name: Homo sapiens]	Y	18	2WT8-B	-	-	-	-	-	-	-	-	-
3SZM	E	Q8NEM0	-	-	-	-	-	-	-	-	-	-	-	-	8.1	2.6	88	187	13	MOLECULE: MICROCEPHALIN;	-	-	-	-	-	-	-	-	-	-	-	-	-	IPR001357;IPR022047	Y	MCPH1	9606 [Organism: human] [Scientific Name: Homo sapiens]	Y	18	2WT8-B	-	-	-	-	-	-	-	-	-
3SZM	E	Q8NEM0	-	-	-	-	-	-	-	-	-	-	-	-	8.1	2.6	88	187	13	MOLECULE: MICROCEPHALIN;	-	-	-	-	-	-	-	-	-	-	-	-	-	IPR001357;IPR022047	Y	MCPH1	9606 [Organism: human] [Scientific Name: Homo sapiens]	Y	18	2WT8-B	-	-	-	-	-	-	-	-	-
3SZM	E	Q8NEM0	-	-	-	-	-	-	-	-	-	-	-	-	8.1	2.6	88	187	13	MOLECULE: MICROCEPHALIN;	-	-	-	-	-	-	-	-	-	-	-	-	-	IPR001357;IPR022047	Y	MCPH1	9606 [Organism: human] [Scientific Name: Homo sapiens]	Y	18	2WT8-B	-	-	-	-	-	-	-	-	-
3SZM	E	Q8NEM0	-	-	-	-	-	-	-	-	-	-	-	-	8.1	2.6	88	187	13	MOLECULE: MICROCEPHALIN;	-	-	-	-	-	-	-	-	-	-	-	-	-	IPR001357;IPR022047	Y	MCPH1	9606 [Organism: human] [Scientific Name: Homo sapiens]	Y	18	2WT8-B	-	-	-	-	-	-	-	-	-
3SZM	E	Q8NEM0	-	-	-	-	-	-	-	-	-	-	-	-	8.1	2.6	88	187	13	MOLECULE: MICROCEPHALIN;	-	-	-	-	-	-	-	-	-	-	-	-	-	IPR001357;IPR022047	Y	MCPH1	9606 [Organism: human] [Scientific Name: Homo sapiens]	Y	18	2WT8-B	-	-	-	-	-	-	-	-	-
3SZM	E	Q8NEM0	-	-	-	-	-	-	-	-	-	-	-	-	8.1	2.6	88	187	13	MOLECULE: MICROCEPHALIN;	-	-	-	-	-	-	-	-	-	-	-	-	-	IPR001357;IPR022047	Y	MCPH1	9606 [Organism: human] [Scientific Name: Homo sapiens]	Y	18	2WT8-B	-	-	-	-	-	-	-	-	-
3SZM	E	Q8NEM0	-	-	-	-	-	-	-	-	-	-	-	-	8.1	2.6	88	187	13	MOLECULE: MICROCEPHALIN;	-	-	-	-	-	-	-	-	-	-	-	-	-	IPR001357;IPR022047	Y	MCPH1	9606 [Organism: human] [Scientific Name: Homo sapiens]	Y	14	3U3Z-A01	-	-	-	-	-	-	-	-	-
3SZM	E	Q8NEM0	-	-	-	-	-	-	-	-	-	-	-	-	8.1	2.6	88	187	13	MOLECULE: MICROCEPHALIN;	-	-	-	-	-	-	-	-	-	-	-	-	-	IPR001357;IPR022047	Y	MCPH1	9606 [Organism: human] [Scientific Name: Homo sapiens]	Y	27	3U3Z-A02	-	-	-	-	-	-	-	-	-
3SZM	F	Q8NEM0	-	-	-	-	-	-	-	-	-	-	-	-	8.1	2.6	88	189	13	MOLECULE: MICROCEPHALIN;	-	-	-	-	-	-	-	-	-	-	-	-	-	IPR001357;IPR022047	Y	MCPH1	9606 [Organism: human] [Scientific Name: Homo sapiens]	Y	18	2WT8-B	-	-	-	-	-	-	-	-	-
3SZM	F	Q8NEM0	-	-	-	-	-	-	-	-	-	-	-	-	8.1	2.6	88	189	13	MOLECULE: MICROCEPHALIN;	-	-	-	-	-	-	-	-	-	-	-	-	-	IPR001357;IPR022047	Y	MCPH1	9606 [Organism: human] [Scientific Name: Homo sapiens]	Y	18	2WT8-B	-	-	-	-	-	-	-	-	-
3SZM	F	Q8NEM0	-	-	-	-	-	-	-	-	-	-	-	-	8.1	2.6	88	189	13	MOLECULE: MICROCEPHALIN;	-	-	-	-	-	-	-	-	-	-	-	-	-	IPR001357;IPR022047	Y	MCPH1	9606 [Organism: human] [Scientific Name: Homo sapiens]	Y	18	2WT8-B	-	-	-	-	-	-	-	-	-
3SZM	F	Q8NEM0	-	-	-	-	-	-	-	-	-	-	-	-	8.1	2.6	88	189	13	MOLECULE: MICROCEPHALIN;	-	-	-	-	-	-	-	-	-	-	-	-	-	IPR001357;IPR022047	Y	MCPH1	9606 [Organism: human] [Scientific Name: Homo sapiens]	Y	18	2WT8-B	-	-	-	-	-	-	-	-	-
3SZM	F	Q8NEM0	-	-	-	-	-	-	-	-	-	-	-	-	8.1	2.6	88	189	13	MOLECULE: MICROCEPHALIN;	-	-	-	-	-	-	-	-	-	-	-	-	-	IPR001357;IPR022047	Y	MCPH1	9606 [Organism: human] [Scientific Name: Homo sapiens]	Y	18	2WT8-B	-	-	-	-	-	-	-	-	-
3SZM	F	Q8NEM0	-	-	-	-	-	-	-	-	-	-	-	-	8.1	2.6	88	189	13	MOLECULE: MICROCEPHALIN;	-	-	-	-	-	-	-	-	-	-	-	-	-	IPR001357;IPR022047	Y	MCPH1	9606 [Organism: human] [Scientific Name: Homo sapiens]	Y	18	2WT8-B	-	-	-	-	-	-	-	-	-
3SZM	F	Q8NEM0	-	-	-	-	-	-	-	-	-	-	-	-	8.1	2.6	88	189	13	MOLECULE: MICROCEPHALIN;	-	-	-	-	-	-	-	-	-	-	-	-	-	IPR001357;IPR022047	Y	MCPH1	9606 [Organism: human] [Scientific Name: Homo sapiens]	Y	18	2WT8-B	-	-	-	-	-	-	-	-	-
3SZM	F	Q8NEM0	-	-	-	-	-	-	-	-	-	-	-	-	8.1	2.6	88	189	13	MOLECULE: MICROCEPHALIN;	-	-	-	-	-	-	-	-	-	-	-	-	-	IPR001357;IPR022047	Y	MCPH1	9606 [Organism: human] [Scientific Name: Homo sapiens]	Y	18	2WT8-B	-	-	-	-	-	-	-	-	-
3SZM	F	Q8NEM0	-	-	-	-	-	-	-	-	-	-	-	-	8.1	2.6	88	189	13	MOLECULE: MICROCEPHALIN;	-	-	-	-	-	-	-	-	-	-	-	-	-	IPR001357;IPR022047	Y	MCPH1	9606 [Organism: human] [Scientific Name: Homo sapiens]	Y	18	2WT8-B	-	-	-	-	-	-	-	-	-
3SZM	F	Q8NEM0	-	-	-	-	-	-	-	-	-	-	-	-	8.1	2.6	88	189	13	MOLECULE: MICROCEPHALIN;	-	-	-	-	-	-	-	-	-	-	-	-	-	IPR001357;IPR022047	Y	MCPH1	9606 [Organism: human] [Scientific Name: Homo sapiens]	Y	18	2WT8-B	-	-	-	-	-	-	-	-	-
3SZM	F	Q8NEM0	-	-	-	-	-	-	-	-	-	-	-	-	8.1	2.6	88	189	13	MOLECULE: MICROCEPHALIN;	-	-	-	-	-	-	-	-	-	-	-	-	-	IPR001357;IPR022047	Y	MCPH1	9606 [Organism: human] [Scientific Name: Homo sapiens]	Y	18	2WT8-B	-	-	-	-	-	-	-	-	-
3SZM	F	Q8NEM0	-	-	-	-	-	-	-	-	-	-	-	-	8.1	2.6	88	189	13	MOLECULE: MICROCEPHALIN;	-	-	-	-	-	-	-	-	-	-	-	-	-	IPR001357;IPR022047	Y	MCPH1	9606 [Organism: human] [Scientific Name: Homo sapiens]	Y	18	2WT8-B	-	-	-	-	-	-	-	-	-
3SZM	F	Q8NEM0	-	-	-	-	-	-	-	-	-	-	-	-	8.1	2.6	88	189	13	MOLECULE: MICROCEPHALIN;	-	-	-	-	-	-	-	-	-	-	-	-	-	IPR001357;IPR022047	Y	MCPH1	9606 [Organism: human] [Scientific Name: Homo sapiens]	Y	18	2WT8-B	-	-	-	-	-	-	-	-	-
3SZM	F	Q8NEM0	-	-	-	-	-	-	-	-	-	-	-	-	8.1	2.6	88	189	13	MOLECULE: MICROCEPHALIN;	-	-	-	-	-	-	-	-	-	-	-	-	-	IPR001357;IPR022047	Y	MCPH1	9606 [Organism: human] [Scientific Name: Homo sapiens]	Y	18	2WT8-B	-	-	-	-	-	-	-	-	-
3SZM	F	Q8NEM0	-	-	-	-	-	-	-	-	-	-	-	-	8.1	2.6	88	189	13	MOLECULE: MICROCEPHALIN;	-	-	-	-	-	-	-	-	-	-	-	-	-	IPR001357;IPR022047	Y	MCPH1	9606 [Organism: human] [Scientific Name: Homo sapiens]	Y	18	2WT8-B	-	-	-	-	-	-	-	-	-
3SZM	F	Q8NEM0	-	-	-	-	-	-	-	-	-	-	-	-	8.1	2.6	88	189	13	MOLECULE: MICROCEPHALIN;	-	-	-	-	-	-	-	-	-	-	-	-	-	IPR001357;IPR022047	Y	MCPH1	9606 [Organism: human] [Scientific Name: Homo sapiens]	Y	18	2WT8-B	-	-	-	-	-	-	-	-	-
3SZM	F	Q8NEM0	-	-	-	-	-	-	-	-	-	-	-	-	8.1	2.6	88	189	13	MOLECULE: MICROCEPHALIN;	-	-	-	-	-	-	-	-	-	-	-	-	-	IPR001357;IPR022047	Y	MCPH1	9606 [Organism: human] [Scientific Name: Homo sapiens]	Y	18	2WT8-B	-	-	-	-	-	-	-	-	-
3SZM	F	Q8NEM0	-	-	-	-	-	-	-	-	-	-	-	-	8.1	2.6	88	189	13	MOLECULE: MICROCEPHALIN;	-	-	-	-	-	-	-	-	-	-	-	-	-	IPR001357;IPR022047	Y	MCPH1	9606 [Organism: human] [Scientific Name: Homo sapiens]	Y	18	2WT8-B	-	-	-	-	-	-	-	-	-
3SZM	F	Q8NEM0	-	-	-	-	-	-	-	-	-	-	-	-	8.1	2.6	88	189	13	MOLECULE: MICROCEPHALIN;	-	-	-	-	-	-	-	-	-	-	-	-	-	IPR001357;IPR022047	Y	MCPH1	9606 [Organism: human] [Scientific Name: Homo sapiens]	Y	18	2WT8-B	-	-	-	-	-	-	-	-	-
3SZM	F	Q8NEM0	-	-	-	-	-	-	-	-	-	-	-	-	8.1	2.6	88	189	13	MOLECULE: MICROCEPHALIN;	-	-	-	-	-	-	-	-	-	-	-	-	-	IPR001357;IPR022047	Y	MCPH1	9606 [Organism: human] [Scientific Name: Homo sapiens]	Y	18	2WT8-B	-	-	-	-	-	-	-	-	-
3SZM	F	Q8NEM0	-	-	-	-	-	-	-	-	-	-	-	-	8.1	2.6	88	189	13	MOLECULE: MICROCEPHALIN;	-	-	-	-	-	-	-	-	-	-	-	-	-	IPR001357;IPR022047	Y	MCPH1	9606 [Organism: human] [Scientific Name: Homo sapiens]	Y	18	2WT8-B	-	-	-	-	-	-	-	-	-
3SZM	F	Q8NEM0	-	-	-	-	-	-	-	-	-	-	-	-	8.1	2.6	88	189	13	MOLECULE: MICROCEPHALIN;	-	-	-	-	-	-	-	-	-	-	-	-	-	IPR001357;IPR022047	Y	MCPH1	9606 [Organism: human] [Scientific Name: Homo sapiens]	Y	18	2WT8-B	-	-	-	-	-	-	-	-	-
3SZM	F	Q8NEM0	-	-	-	-	-	-	-	-	-	-	-	-	8.1	2.6	88	189	13	MOLECULE: MICROCEPHALIN;	-	-	-	-	-	-	-	-	-	-	-	-	-	IPR001357;IPR022047	Y	MCPH1	9606 [Organism: human] [Scientific Name: Homo sapiens]	Y	18	2WT8-B	-	-	-	-	-	-	-	-	-
3SZM	F	Q8NEM0	-	-	-	-	-	-	-	-	-	-	-	-	8.1	2.6	88	189	13	MOLECULE: MICROCEPHALIN;	-	-	-	-	-	-	-	-	-	-	-	-	-	IPR001357;IPR022047	Y	MCPH1	9606 [Organism: human] [Scientific Name: Homo sapiens]	Y	18	2WT8-B	-	-	-	-	-	-	-	-	-
3SZM	F	Q8NEM0	-	-	-	-	-	-	-	-	-	-	-	-	8.1	2.6	88	189	13	MOLECULE: MICROCEPHALIN;	-	-	-	-	-	-	-	-	-	-	-	-	-	IPR001357;IPR022047	Y	MCPH1	9606 [Organism: human] [Scientific Name: Homo sapiens]	Y	18	2WT8-B	-	-	-	-	-	-	-	-	-
3SZM	F	Q8NEM0	-	-	-	-	-	-	-	-	-	-	-	-	8.1	2.6	88	189	13	MOLECULE: MICROCEPHALIN;	-	-	-	-	-	-	-	-	-	-	-	-	-	IPR001357;IPR022047	Y	MCPH1	9606 [Organism: human] [Scientific Name: Homo sapiens]	Y	18	2WT8-B	-	-	-	-	-	-	-	-	-
3SZM	F	Q8NEM0	-	-	-	-	-	-	-	-	-	-	-	-	8.1	2.6	88	189	13	MOLECULE: MICROCEPHALIN;	-	-	-	-	-	-	-	-	-	-	-	-	-	IPR001357;IPR022047	Y	MCPH1	9606 [Organism: human] [Scientific Name: Homo sapiens]	Y	18	2WT8-B	-	-	-	-	-	-	-	-	-
3SZM	F	Q8NEM0	-	-	-	-	-	-	-	-	-	-	-	-	8.1	2.6	88	189	13	MOLECULE: MICROCEPHALIN;	-	-	-	-	-	-	-	-	-	-	-	-	-	IPR001357;IPR022047	Y	MCPH1	9606 [Organism: human] [Scientific Name: Homo sapiens]	Y	18	2WT8-B	-	-	-	-	-	-	-	-	-
3SZM	F	Q8NEM0	-	-	-	-	-	-	-	-	-	-	-	-	8.1	2.6	88	189	13	MOLECULE: MICROCEPHALIN;	-	-	-	-	-	-	-	-	-	-	-	-	-	IPR001357;IPR022047	Y	MCPH1	9606 [Organism: human] [Scientific Name: Homo sapiens]	Y	18	2WT8-B	-	-	-	-	-	-	-	-	-
3SZM	F	Q8NEM0	-	-	-	-	-	-	-	-	-	-	-	-	8.1	2.6	88	189	13	MOLECULE: MICROCEPHALIN;	-	-	-	-	-	-	-	-	-	-	-	-	-	IPR001357;IPR022047	Y	MCPH1	9606 [Organism: human] [Scientific Name: Homo sapiens]	Y	18	2WT8-B	-	-	-	-	-	-	-	-	-
3SZM	F	Q8NEM0	-	-	-	-	-	-	-	-	-	-	-	-	8.1	2.6	88	189	13	MOLECULE: MICROCEPHALIN;	-	-	-	-	-	-	-	-	-	-	-	-	-	IPR001357;IPR022047	Y	MCPH1	9606 [Organism: human] [Scientific Name: Homo sapiens]	Y	14	3U3Z-A01	-	-	-	-	-	-	-	-	-
3SZM	F	Q8NEM0	-	-	-	-	-	-	-	-	-	-	-	-	8.1	2.6	88	189	13	MOLECULE: MICROCEPHALIN;	-	-	-	-	-	-	-	-	-	-	-	-	-	IPR001357;IPR022047	Y	MCPH1	9606 [Organism: human] [Scientific Name: Homo sapiens]	Y	27	3U3Z-A02	-	-	-	-	-	-	-	-	-
3SHV	B	Q8NEM0	-	-	-	-	-	-	-	-	-	-	-	-	8.1	2.7	89	190	12	MOLECULE: MICROCEPHALIN;	-	-	-	-	-	-	-	-	-	-	-	-	-	IPR001357;IPR022047	Y	MCPH1	9606 [Organism: human] [Scientific Name: Homo sapiens]	Y	18	2WT8-B	-	-	-	-	-	-	-	-	-
3SHV	B	Q8NEM0	-	-	-	-	-	-	-	-	-	-	-	-	8.1	2.7	89	190	12	MOLECULE: MICROCEPHALIN;	-	-	-	-	-	-	-	-	-	-	-	-	-	IPR001357;IPR022047	Y	MCPH1	9606 [Organism: human] [Scientific Name: Homo sapiens]	Y	18	2WT8-B	-	-	-	-	-	-	-	-	-
3SHV	B	Q8NEM0	-	-	-	-	-	-	-	-	-	-	-	-	8.1	2.7	89	190	12	MOLECULE: MICROCEPHALIN;	-	-	-	-	-	-	-	-	-	-	-	-	-	IPR001357;IPR022047	Y	MCPH1	9606 [Organism: human] [Scientific Name: Homo sapiens]	Y	18	2WT8-B	-	-	-	-	-	-	-	-	-
3SHV	B	Q8NEM0	-	-	-	-	-	-	-	-	-	-	-	-	8.1	2.7	89	190	12	MOLECULE: MICROCEPHALIN;	-	-	-	-	-	-	-	-	-	-	-	-	-	IPR001357;IPR022047	Y	MCPH1	9606 [Organism: human] [Scientific Name: Homo sapiens]	Y	18	2WT8-B	-	-	-	-	-	-	-	-	-
3SHV	B	Q8NEM0	-	-	-	-	-	-	-	-	-	-	-	-	8.1	2.7	89	190	12	MOLECULE: MICROCEPHALIN;	-	-	-	-	-	-	-	-	-	-	-	-	-	IPR001357;IPR022047	Y	MCPH1	9606 [Organism: human] [Scientific Name: Homo sapiens]	Y	18	2WT8-B	-	-	-	-	-	-	-	-	-
3SHV	B	Q8NEM0	-	-	-	-	-	-	-	-	-	-	-	-	8.1	2.7	89	190	12	MOLECULE: MICROCEPHALIN;	-	-	-	-	-	-	-	-	-	-	-	-	-	IPR001357;IPR022047	Y	MCPH1	9606 [Organism: human] [Scientific Name: Homo sapiens]	Y	18	2WT8-B	-	-	-	-	-	-	-	-	-
3SHV	B	Q8NEM0	-	-	-	-	-	-	-	-	-	-	-	-	8.1	2.7	89	190	12	MOLECULE: MICROCEPHALIN;	-	-	-	-	-	-	-	-	-	-	-	-	-	IPR001357;IPR022047	Y	MCPH1	9606 [Organism: human] [Scientific Name: Homo sapiens]	Y	18	2WT8-B	-	-	-	-	-	-	-	-	-
3SHV	B	Q8NEM0	-	-	-	-	-	-	-	-	-	-	-	-	8.1	2.7	89	190	12	MOLECULE: MICROCEPHALIN;	-	-	-	-	-	-	-	-	-	-	-	-	-	IPR001357;IPR022047	Y	MCPH1	9606 [Organism: human] [Scientific Name: Homo sapiens]	Y	18	2WT8-B	-	-	-	-	-	-	-	-	-
3SHV	B	Q8NEM0	-	-	-	-	-	-	-	-	-	-	-	-	8.1	2.7	89	190	12	MOLECULE: MICROCEPHALIN;	-	-	-	-	-	-	-	-	-	-	-	-	-	IPR001357;IPR022047	Y	MCPH1	9606 [Organism: human] [Scientific Name: Homo sapiens]	Y	18	2WT8-B	-	-	-	-	-	-	-	-	-
3SHV	B	Q8NEM0	-	-	-	-	-	-	-	-	-	-	-	-	8.1	2.7	89	190	12	MOLECULE: MICROCEPHALIN;	-	-	-	-	-	-	-	-	-	-	-	-	-	IPR001357;IPR022047	Y	MCPH1	9606 [Organism: human] [Scientific Name: Homo sapiens]	Y	18	2WT8-B	-	-	-	-	-	-	-	-	-
3SHV	B	Q8NEM0	-	-	-	-	-	-	-	-	-	-	-	-	8.1	2.7	89	190	12	MOLECULE: MICROCEPHALIN;	-	-	-	-	-	-	-	-	-	-	-	-	-	IPR001357;IPR022047	Y	MCPH1	9606 [Organism: human] [Scientific Name: Homo sapiens]	Y	18	2WT8-B	-	-	-	-	-	-	-	-	-
3SHV	B	Q8NEM0	-	-	-	-	-	-	-	-	-	-	-	-	8.1	2.7	89	190	12	MOLECULE: MICROCEPHALIN;	-	-	-	-	-	-	-	-	-	-	-	-	-	IPR001357;IPR022047	Y	MCPH1	9606 [Organism: human] [Scientific Name: Homo sapiens]	Y	18	2WT8-B	-	-	-	-	-	-	-	-	-
3SHV	B	Q8NEM0	-	-	-	-	-	-	-	-	-	-	-	-	8.1	2.7	89	190	12	MOLECULE: MICROCEPHALIN;	-	-	-	-	-	-	-	-	-	-	-	-	-	IPR001357;IPR022047	Y	MCPH1	9606 [Organism: human] [Scientific Name: Homo sapiens]	Y	18	2WT8-B	-	-	-	-	-	-	-	-	-
3SHV	B	Q8NEM0	-	-	-	-	-	-	-	-	-	-	-	-	8.1	2.7	89	190	12	MOLECULE: MICROCEPHALIN;	-	-	-	-	-	-	-	-	-	-	-	-	-	IPR001357;IPR022047	Y	MCPH1	9606 [Organism: human] [Scientific Name: Homo sapiens]	Y	18	2WT8-B	-	-	-	-	-	-	-	-	-
3SHV	B	Q8NEM0	-	-	-	-	-	-	-	-	-	-	-	-	8.1	2.7	89	190	12	MOLECULE: MICROCEPHALIN;	-	-	-	-	-	-	-	-	-	-	-	-	-	IPR001357;IPR022047	Y	MCPH1	9606 [Organism: human] [Scientific Name: Homo sapiens]	Y	18	2WT8-B	-	-	-	-	-	-	-	-	-
3SHV	B	Q8NEM0	-	-	-	-	-	-	-	-	-	-	-	-	8.1	2.7	89	190	12	MOLECULE: MICROCEPHALIN;	-	-	-	-	-	-	-	-	-	-	-	-	-	IPR001357;IPR022047	Y	MCPH1	9606 [Organism: human] [Scientific Name: Homo sapiens]	Y	18	2WT8-B	-	-	-	-	-	-	-	-	-
3SHV	B	Q8NEM0	-	-	-	-	-	-	-	-	-	-	-	-	8.1	2.7	89	190	12	MOLECULE: MICROCEPHALIN;	-	-	-	-	-	-	-	-	-	-	-	-	-	IPR001357;IPR022047	Y	MCPH1	9606 [Organism: human] [Scientific Name: Homo sapiens]	Y	18	2WT8-B	-	-	-	-	-	-	-	-	-
3SHV	B	Q8NEM0	-	-	-	-	-	-	-	-	-	-	-	-	8.1	2.7	89	190	12	MOLECULE: MICROCEPHALIN;	-	-	-	-	-	-	-	-	-	-	-	-	-	IPR001357;IPR022047	Y	MCPH1	9606 [Organism: human] [Scientific Name: Homo sapiens]	Y	18	2WT8-B	-	-	-	-	-	-	-	-	-
3SHV	B	Q8NEM0	-	-	-	-	-	-	-	-	-	-	-	-	8.1	2.7	89	190	12	MOLECULE: MICROCEPHALIN;	-	-	-	-	-	-	-	-	-	-	-	-	-	IPR001357;IPR022047	Y	MCPH1	9606 [Organism: human] [Scientific Name: Homo sapiens]	Y	18	2WT8-B	-	-	-	-	-	-	-	-	-
3SHV	B	Q8NEM0	-	-	-	-	-	-	-	-	-	-	-	-	8.1	2.7	89	190	12	MOLECULE: MICROCEPHALIN;	-	-	-	-	-	-	-	-	-	-	-	-	-	IPR001357;IPR022047	Y	MCPH1	9606 [Organism: human] [Scientific Name: Homo sapiens]	Y	18	2WT8-B	-	-	-	-	-	-	-	-	-
3SHV	B	Q8NEM0	-	-	-	-	-	-	-	-	-	-	-	-	8.1	2.7	89	190	12	MOLECULE: MICROCEPHALIN;	-	-	-	-	-	-	-	-	-	-	-	-	-	IPR001357;IPR022047	Y	MCPH1	9606 [Organism: human] [Scientific Name: Homo sapiens]	Y	18	2WT8-B	-	-	-	-	-	-	-	-	-
3SHV	B	Q8NEM0	-	-	-	-	-	-	-	-	-	-	-	-	8.1	2.7	89	190	12	MOLECULE: MICROCEPHALIN;	-	-	-	-	-	-	-	-	-	-	-	-	-	IPR001357;IPR022047	Y	MCPH1	9606 [Organism: human] [Scientific Name: Homo sapiens]	Y	18	2WT8-B	-	-	-	-	-	-	-	-	-
3SHV	B	Q8NEM0	-	-	-	-	-	-	-	-	-	-	-	-	8.1	2.7	89	190	12	MOLECULE: MICROCEPHALIN;	-	-	-	-	-	-	-	-	-	-	-	-	-	IPR001357;IPR022047	Y	MCPH1	9606 [Organism: human] [Scientific Name: Homo sapiens]	Y	18	2WT8-B	-	-	-	-	-	-	-	-	-
3SHV	B	Q8NEM0	-	-	-	-	-	-	-	-	-	-	-	-	8.1	2.7	89	190	12	MOLECULE: MICROCEPHALIN;	-	-	-	-	-	-	-	-	-	-	-	-	-	IPR001357;IPR022047	Y	MCPH1	9606 [Organism: human] [Scientific Name: Homo sapiens]	Y	18	2WT8-B	-	-	-	-	-	-	-	-	-
3SHV	B	Q8NEM0	-	-	-	-	-	-	-	-	-	-	-	-	8.1	2.7	89	190	12	MOLECULE: MICROCEPHALIN;	-	-	-	-	-	-	-	-	-	-	-	-	-	IPR001357;IPR022047	Y	MCPH1	9606 [Organism: human] [Scientific Name: Homo sapiens]	Y	18	2WT8-B	-	-	-	-	-	-	-	-	-
3SHV	B	Q8NEM0	-	-	-	-	-	-	-	-	-	-	-	-	8.1	2.7	89	190	12	MOLECULE: MICROCEPHALIN;	-	-	-	-	-	-	-	-	-	-	-	-	-	IPR001357;IPR022047	Y	MCPH1	9606 [Organism: human] [Scientific Name: Homo sapiens]	Y	18	2WT8-B	-	-	-	-	-	-	-	-	-
3SHV	B	Q8NEM0	-	-	-	-	-	-	-	-	-	-	-	-	8.1	2.7	89	190	12	MOLECULE: MICROCEPHALIN;	-	-	-	-	-	-	-	-	-	-	-	-	-	IPR001357;IPR022047	Y	MCPH1	9606 [Organism: human] [Scientific Name: Homo sapiens]	Y	18	2WT8-B	-	-	-	-	-	-	-	-	-
3SHV	B	Q8NEM0	-	-	-	-	-	-	-	-	-	-	-	-	8.1	2.7	89	190	12	MOLECULE: MICROCEPHALIN;	-	-	-	-	-	-	-	-	-	-	-	-	-	IPR001357;IPR022047	Y	MCPH1	9606 [Organism: human] [Scientific Name: Homo sapiens]	Y	18	2WT8-B	-	-	-	-	-	-	-	-	-
3SHV	B	Q8NEM0	-	-	-	-	-	-	-	-	-	-	-	-	8.1	2.7	89	190	12	MOLECULE: MICROCEPHALIN;	-	-	-	-	-	-	-	-	-	-	-	-	-	IPR001357;IPR022047	Y	MCPH1	9606 [Organism: human] [Scientific Name: Homo sapiens]	Y	18	2WT8-B	-	-	-	-	-	-	-	-	-
3SHV	B	Q8NEM0	-	-	-	-	-	-	-	-	-	-	-	-	8.1	2.7	89	190	12	MOLECULE: MICROCEPHALIN;	-	-	-	-	-	-	-	-	-	-	-	-	-	IPR001357;IPR022047	Y	MCPH1	9606 [Organism: human] [Scientific Name: Homo sapiens]	Y	18	2WT8-B	-	-	-	-	-	-	-	-	-
3SHV	B	Q8NEM0	-	-	-	-	-	-	-	-	-	-	-	-	8.1	2.7	89	190	12	MOLECULE: MICROCEPHALIN;	-	-	-	-	-	-	-	-	-	-	-	-	-	IPR001357;IPR022047	Y	MCPH1	9606 [Organism: human] [Scientific Name: Homo sapiens]	Y	14	3U3Z-A01	-	-	-	-	-	-	-	-	-
3SHV	B	Q8NEM0	-	-	-	-	-	-	-	-	-	-	-	-	8.1	2.7	89	190	12	MOLECULE: MICROCEPHALIN;	-	-	-	-	-	-	-	-	-	-	-	-	-	IPR001357;IPR022047	Y	MCPH1	9606 [Organism: human] [Scientific Name: Homo sapiens]	Y	27	3U3Z-A02	-	-	-	-	-	-	-	-	-
3T1N	A	Q8NEM0	-	-	-	-	-	-	-	-	-	-	-	-	8	2.7	89	190	13	MOLECULE: MICROCEPHALIN;	-	-	-	-	-	-	-	-	-	-	-	-	-	IPR001357;IPR022047	Y	MCPH1	9606 [Organism: human] [Scientific Name: Homo sapiens]	Y	18	2WT8-B	-	-	-	-	-	-	-	-	-
3T1N	A	Q8NEM0	-	-	-	-	-	-	-	-	-	-	-	-	8	2.7	89	190	13	MOLECULE: MICROCEPHALIN;	-	-	-	-	-	-	-	-	-	-	-	-	-	IPR001357;IPR022047	Y	MCPH1	9606 [Organism: human] [Scientific Name: Homo sapiens]	Y	18	2WT8-B	-	-	-	-	-	-	-	-	-
3T1N	A	Q8NEM0	-	-	-	-	-	-	-	-	-	-	-	-	8	2.7	89	190	13	MOLECULE: MICROCEPHALIN;	-	-	-	-	-	-	-	-	-	-	-	-	-	IPR001357;IPR022047	Y	MCPH1	9606 [Organism: human] [Scientific Name: Homo sapiens]	Y	18	2WT8-B	-	-	-	-	-	-	-	-	-
3T1N	A	Q8NEM0	-	-	-	-	-	-	-	-	-	-	-	-	8	2.7	89	190	13	MOLECULE: MICROCEPHALIN;	-	-	-	-	-	-	-	-	-	-	-	-	-	IPR001357;IPR022047	Y	MCPH1	9606 [Organism: human] [Scientific Name: Homo sapiens]	Y	18	2WT8-B	-	-	-	-	-	-	-	-	-
3T1N	A	Q8NEM0	-	-	-	-	-	-	-	-	-	-	-	-	8	2.7	89	190	13	MOLECULE: MICROCEPHALIN;	-	-	-	-	-	-	-	-	-	-	-	-	-	IPR001357;IPR022047	Y	MCPH1	9606 [Organism: human] [Scientific Name: Homo sapiens]	Y	18	2WT8-B	-	-	-	-	-	-	-	-	-
3T1N	A	Q8NEM0	-	-	-	-	-	-	-	-	-	-	-	-	8	2.7	89	190	13	MOLECULE: MICROCEPHALIN;	-	-	-	-	-	-	-	-	-	-	-	-	-	IPR001357;IPR022047	Y	MCPH1	9606 [Organism: human] [Scientific Name: Homo sapiens]	Y	18	2WT8-B	-	-	-	-	-	-	-	-	-
3T1N	A	Q8NEM0	-	-	-	-	-	-	-	-	-	-	-	-	8	2.7	89	190	13	MOLECULE: MICROCEPHALIN;	-	-	-	-	-	-	-	-	-	-	-	-	-	IPR001357;IPR022047	Y	MCPH1	9606 [Organism: human] [Scientific Name: Homo sapiens]	Y	18	2WT8-B	-	-	-	-	-	-	-	-	-
3T1N	A	Q8NEM0	-	-	-	-	-	-	-	-	-	-	-	-	8	2.7	89	190	13	MOLECULE: MICROCEPHALIN;	-	-	-	-	-	-	-	-	-	-	-	-	-	IPR001357;IPR022047	Y	MCPH1	9606 [Organism: human] [Scientific Name: Homo sapiens]	Y	18	2WT8-B	-	-	-	-	-	-	-	-	-
3T1N	A	Q8NEM0	-	-	-	-	-	-	-	-	-	-	-	-	8	2.7	89	190	13	MOLECULE: MICROCEPHALIN;	-	-	-	-	-	-	-	-	-	-	-	-	-	IPR001357;IPR022047	Y	MCPH1	9606 [Organism: human] [Scientific Name: Homo sapiens]	Y	18	2WT8-B	-	-	-	-	-	-	-	-	-
3T1N	A	Q8NEM0	-	-	-	-	-	-	-	-	-	-	-	-	8	2.7	89	190	13	MOLECULE: MICROCEPHALIN;	-	-	-	-	-	-	-	-	-	-	-	-	-	IPR001357;IPR022047	Y	MCPH1	9606 [Organism: human] [Scientific Name: Homo sapiens]	Y	18	2WT8-B	-	-	-	-	-	-	-	-	-
3T1N	A	Q8NEM0	-	-	-	-	-	-	-	-	-	-	-	-	8	2.7	89	190	13	MOLECULE: MICROCEPHALIN;	-	-	-	-	-	-	-	-	-	-	-	-	-	IPR001357;IPR022047	Y	MCPH1	9606 [Organism: human] [Scientific Name: Homo sapiens]	Y	18	2WT8-B	-	-	-	-	-	-	-	-	-
3T1N	A	Q8NEM0	-	-	-	-	-	-	-	-	-	-	-	-	8	2.7	89	190	13	MOLECULE: MICROCEPHALIN;	-	-	-	-	-	-	-	-	-	-	-	-	-	IPR001357;IPR022047	Y	MCPH1	9606 [Organism: human] [Scientific Name: Homo sapiens]	Y	18	2WT8-B	-	-	-	-	-	-	-	-	-
3T1N	A	Q8NEM0	-	-	-	-	-	-	-	-	-	-	-	-	8	2.7	89	190	13	MOLECULE: MICROCEPHALIN;	-	-	-	-	-	-	-	-	-	-	-	-	-	IPR001357;IPR022047	Y	MCPH1	9606 [Organism: human] [Scientific Name: Homo sapiens]	Y	18	2WT8-B	-	-	-	-	-	-	-	-	-
3T1N	A	Q8NEM0	-	-	-	-	-	-	-	-	-	-	-	-	8	2.7	89	190	13	MOLECULE: MICROCEPHALIN;	-	-	-	-	-	-	-	-	-	-	-	-	-	IPR001357;IPR022047	Y	MCPH1	9606 [Organism: human] [Scientific Name: Homo sapiens]	Y	18	2WT8-B	-	-	-	-	-	-	-	-	-
3T1N	A	Q8NEM0	-	-	-	-	-	-	-	-	-	-	-	-	8	2.7	89	190	13	MOLECULE: MICROCEPHALIN;	-	-	-	-	-	-	-	-	-	-	-	-	-	IPR001357;IPR022047	Y	MCPH1	9606 [Organism: human] [Scientific Name: Homo sapiens]	Y	18	2WT8-B	-	-	-	-	-	-	-	-	-
3T1N	A	Q8NEM0	-	-	-	-	-	-	-	-	-	-	-	-	8	2.7	89	190	13	MOLECULE: MICROCEPHALIN;	-	-	-	-	-	-	-	-	-	-	-	-	-	IPR001357;IPR022047	Y	MCPH1	9606 [Organism: human] [Scientific Name: Homo sapiens]	Y	18	2WT8-B	-	-	-	-	-	-	-	-	-
3T1N	A	Q8NEM0	-	-	-	-	-	-	-	-	-	-	-	-	8	2.7	89	190	13	MOLECULE: MICROCEPHALIN;	-	-	-	-	-	-	-	-	-	-	-	-	-	IPR001357;IPR022047	Y	MCPH1	9606 [Organism: human] [Scientific Name: Homo sapiens]	Y	18	2WT8-B	-	-	-	-	-	-	-	-	-
3T1N	A	Q8NEM0	-	-	-	-	-	-	-	-	-	-	-	-	8	2.7	89	190	13	MOLECULE: MICROCEPHALIN;	-	-	-	-	-	-	-	-	-	-	-	-	-	IPR001357;IPR022047	Y	MCPH1	9606 [Organism: human] [Scientific Name: Homo sapiens]	Y	18	2WT8-B	-	-	-	-	-	-	-	-	-
3T1N	A	Q8NEM0	-	-	-	-	-	-	-	-	-	-	-	-	8	2.7	89	190	13	MOLECULE: MICROCEPHALIN;	-	-	-	-	-	-	-	-	-	-	-	-	-	IPR001357;IPR022047	Y	MCPH1	9606 [Organism: human] [Scientific Name: Homo sapiens]	Y	18	2WT8-B	-	-	-	-	-	-	-	-	-
3T1N	A	Q8NEM0	-	-	-	-	-	-	-	-	-	-	-	-	8	2.7	89	190	13	MOLECULE: MICROCEPHALIN;	-	-	-	-	-	-	-	-	-	-	-	-	-	IPR001357;IPR022047	Y	MCPH1	9606 [Organism: human] [Scientific Name: Homo sapiens]	Y	18	2WT8-B	-	-	-	-	-	-	-	-	-
3T1N	A	Q8NEM0	-	-	-	-	-	-	-	-	-	-	-	-	8	2.7	89	190	13	MOLECULE: MICROCEPHALIN;	-	-	-	-	-	-	-	-	-	-	-	-	-	IPR001357;IPR022047	Y	MCPH1	9606 [Organism: human] [Scientific Name: Homo sapiens]	Y	18	2WT8-B	-	-	-	-	-	-	-	-	-
3T1N	A	Q8NEM0	-	-	-	-	-	-	-	-	-	-	-	-	8	2.7	89	190	13	MOLECULE: MICROCEPHALIN;	-	-	-	-	-	-	-	-	-	-	-	-	-	IPR001357;IPR022047	Y	MCPH1	9606 [Organism: human] [Scientific Name: Homo sapiens]	Y	18	2WT8-B	-	-	-	-	-	-	-	-	-
3T1N	A	Q8NEM0	-	-	-	-	-	-	-	-	-	-	-	-	8	2.7	89	190	13	MOLECULE: MICROCEPHALIN;	-	-	-	-	-	-	-	-	-	-	-	-	-	IPR001357;IPR022047	Y	MCPH1	9606 [Organism: human] [Scientific Name: Homo sapiens]	Y	18	2WT8-B	-	-	-	-	-	-	-	-	-
3T1N	A	Q8NEM0	-	-	-	-	-	-	-	-	-	-	-	-	8	2.7	89	190	13	MOLECULE: MICROCEPHALIN;	-	-	-	-	-	-	-	-	-	-	-	-	-	IPR001357;IPR022047	Y	MCPH1	9606 [Organism: human] [Scientific Name: Homo sapiens]	Y	18	2WT8-B	-	-	-	-	-	-	-	-	-
3T1N	A	Q8NEM0	-	-	-	-	-	-	-	-	-	-	-	-	8	2.7	89	190	13	MOLECULE: MICROCEPHALIN;	-	-	-	-	-	-	-	-	-	-	-	-	-	IPR001357;IPR022047	Y	MCPH1	9606 [Organism: human] [Scientific Name: Homo sapiens]	Y	18	2WT8-B	-	-	-	-	-	-	-	-	-
3T1N	A	Q8NEM0	-	-	-	-	-	-	-	-	-	-	-	-	8	2.7	89	190	13	MOLECULE: MICROCEPHALIN;	-	-	-	-	-	-	-	-	-	-	-	-	-	IPR001357;IPR022047	Y	MCPH1	9606 [Organism: human] [Scientific Name: Homo sapiens]	Y	18	2WT8-B	-	-	-	-	-	-	-	-	-
3T1N	A	Q8NEM0	-	-	-	-	-	-	-	-	-	-	-	-	8	2.7	89	190	13	MOLECULE: MICROCEPHALIN;	-	-	-	-	-	-	-	-	-	-	-	-	-	IPR001357;IPR022047	Y	MCPH1	9606 [Organism: human] [Scientific Name: Homo sapiens]	Y	18	2WT8-B	-	-	-	-	-	-	-	-	-
3T1N	A	Q8NEM0	-	-	-	-	-	-	-	-	-	-	-	-	8	2.7	89	190	13	MOLECULE: MICROCEPHALIN;	-	-	-	-	-	-	-	-	-	-	-	-	-	IPR001357;IPR022047	Y	MCPH1	9606 [Organism: human] [Scientific Name: Homo sapiens]	Y	18	2WT8-B	-	-	-	-	-	-	-	-	-
3T1N	A	Q8NEM0	-	-	-	-	-	-	-	-	-	-	-	-	8	2.7	89	190	13	MOLECULE: MICROCEPHALIN;	-	-	-	-	-	-	-	-	-	-	-	-	-	IPR001357;IPR022047	Y	MCPH1	9606 [Organism: human] [Scientific Name: Homo sapiens]	Y	18	2WT8-B	-	-	-	-	-	-	-	-	-
3T1N	A	Q8NEM0	-	-	-	-	-	-	-	-	-	-	-	-	8	2.7	89	190	13	MOLECULE: MICROCEPHALIN;	-	-	-	-	-	-	-	-	-	-	-	-	-	IPR001357;IPR022047	Y	MCPH1	9606 [Organism: human] [Scientific Name: Homo sapiens]	Y	18	2WT8-B	-	-	-	-	-	-	-	-	-
3T1N	A	Q8NEM0	-	-	-	-	-	-	-	-	-	-	-	-	8	2.7	89	190	13	MOLECULE: MICROCEPHALIN;	-	-	-	-	-	-	-	-	-	-	-	-	-	IPR001357;IPR022047	Y	MCPH1	9606 [Organism: human] [Scientific Name: Homo sapiens]	Y	14	3U3Z-A01	-	-	-	-	-	-	-	-	-
3T1N	A	Q8NEM0	-	-	-	-	-	-	-	-	-	-	-	-	8	2.7	89	190	13	MOLECULE: MICROCEPHALIN;	-	-	-	-	-	-	-	-	-	-	-	-	-	IPR001357;IPR022047	Y	MCPH1	9606 [Organism: human] [Scientific Name: Homo sapiens]	Y	27	3U3Z-A02	-	-	-	-	-	-	-	-	-
3SZM	H	Q8NEM0	-	-	-	-	-	-	-	-	-	-	-	-	8	2.6	88	190	13	MOLECULE: MICROCEPHALIN;	-	-	-	-	-	-	-	-	-	-	-	-	-	IPR001357;IPR022047	Y	MCPH1	9606 [Organism: human] [Scientific Name: Homo sapiens]	Y	18	2WT8-B	-	-	-	-	-	-	-	-	-
3SZM	H	Q8NEM0	-	-	-	-	-	-	-	-	-	-	-	-	8	2.6	88	190	13	MOLECULE: MICROCEPHALIN;	-	-	-	-	-	-	-	-	-	-	-	-	-	IPR001357;IPR022047	Y	MCPH1	9606 [Organism: human] [Scientific Name: Homo sapiens]	Y	18	2WT8-B	-	-	-	-	-	-	-	-	-
3SZM	H	Q8NEM0	-	-	-	-	-	-	-	-	-	-	-	-	8	2.6	88	190	13	MOLECULE: MICROCEPHALIN;	-	-	-	-	-	-	-	-	-	-	-	-	-	IPR001357;IPR022047	Y	MCPH1	9606 [Organism: human] [Scientific Name: Homo sapiens]	Y	18	2WT8-B	-	-	-	-	-	-	-	-	-
3SZM	H	Q8NEM0	-	-	-	-	-	-	-	-	-	-	-	-	8	2.6	88	190	13	MOLECULE: MICROCEPHALIN;	-	-	-	-	-	-	-	-	-	-	-	-	-	IPR001357;IPR022047	Y	MCPH1	9606 [Organism: human] [Scientific Name: Homo sapiens]	Y	18	2WT8-B	-	-	-	-	-	-	-	-	-
3SZM	H	Q8NEM0	-	-	-	-	-	-	-	-	-	-	-	-	8	2.6	88	190	13	MOLECULE: MICROCEPHALIN;	-	-	-	-	-	-	-	-	-	-	-	-	-	IPR001357;IPR022047	Y	MCPH1	9606 [Organism: human] [Scientific Name: Homo sapiens]	Y	18	2WT8-B	-	-	-	-	-	-	-	-	-
3SZM	H	Q8NEM0	-	-	-	-	-	-	-	-	-	-	-	-	8	2.6	88	190	13	MOLECULE: MICROCEPHALIN;	-	-	-	-	-	-	-	-	-	-	-	-	-	IPR001357;IPR022047	Y	MCPH1	9606 [Organism: human] [Scientific Name: Homo sapiens]	Y	18	2WT8-B	-	-	-	-	-	-	-	-	-
3SZM	H	Q8NEM0	-	-	-	-	-	-	-	-	-	-	-	-	8	2.6	88	190	13	MOLECULE: MICROCEPHALIN;	-	-	-	-	-	-	-	-	-	-	-	-	-	IPR001357;IPR022047	Y	MCPH1	9606 [Organism: human] [Scientific Name: Homo sapiens]	Y	18	2WT8-B	-	-	-	-	-	-	-	-	-
3SZM	H	Q8NEM0	-	-	-	-	-	-	-	-	-	-	-	-	8	2.6	88	190	13	MOLECULE: MICROCEPHALIN;	-	-	-	-	-	-	-	-	-	-	-	-	-	IPR001357;IPR022047	Y	MCPH1	9606 [Organism: human] [Scientific Name: Homo sapiens]	Y	18	2WT8-B	-	-	-	-	-	-	-	-	-
3SZM	H	Q8NEM0	-	-	-	-	-	-	-	-	-	-	-	-	8	2.6	88	190	13	MOLECULE: MICROCEPHALIN;	-	-	-	-	-	-	-	-	-	-	-	-	-	IPR001357;IPR022047	Y	MCPH1	9606 [Organism: human] [Scientific Name: Homo sapiens]	Y	18	2WT8-B	-	-	-	-	-	-	-	-	-
3SZM	H	Q8NEM0	-	-	-	-	-	-	-	-	-	-	-	-	8	2.6	88	190	13	MOLECULE: MICROCEPHALIN;	-	-	-	-	-	-	-	-	-	-	-	-	-	IPR001357;IPR022047	Y	MCPH1	9606 [Organism: human] [Scientific Name: Homo sapiens]	Y	18	2WT8-B	-	-	-	-	-	-	-	-	-
3SZM	H	Q8NEM0	-	-	-	-	-	-	-	-	-	-	-	-	8	2.6	88	190	13	MOLECULE: MICROCEPHALIN;	-	-	-	-	-	-	-	-	-	-	-	-	-	IPR001357;IPR022047	Y	MCPH1	9606 [Organism: human] [Scientific Name: Homo sapiens]	Y	18	2WT8-B	-	-	-	-	-	-	-	-	-
3SZM	H	Q8NEM0	-	-	-	-	-	-	-	-	-	-	-	-	8	2.6	88	190	13	MOLECULE: MICROCEPHALIN;	-	-	-	-	-	-	-	-	-	-	-	-	-	IPR001357;IPR022047	Y	MCPH1	9606 [Organism: human] [Scientific Name: Homo sapiens]	Y	18	2WT8-B	-	-	-	-	-	-	-	-	-
3SZM	H	Q8NEM0	-	-	-	-	-	-	-	-	-	-	-	-	8	2.6	88	190	13	MOLECULE: MICROCEPHALIN;	-	-	-	-	-	-	-	-	-	-	-	-	-	IPR001357;IPR022047	Y	MCPH1	9606 [Organism: human] [Scientific Name: Homo sapiens]	Y	18	2WT8-B	-	-	-	-	-	-	-	-	-
3SZM	H	Q8NEM0	-	-	-	-	-	-	-	-	-	-	-	-	8	2.6	88	190	13	MOLECULE: MICROCEPHALIN;	-	-	-	-	-	-	-	-	-	-	-	-	-	IPR001357;IPR022047	Y	MCPH1	9606 [Organism: human] [Scientific Name: Homo sapiens]	Y	18	2WT8-B	-	-	-	-	-	-	-	-	-
3SZM	H	Q8NEM0	-	-	-	-	-	-	-	-	-	-	-	-	8	2.6	88	190	13	MOLECULE: MICROCEPHALIN;	-	-	-	-	-	-	-	-	-	-	-	-	-	IPR001357;IPR022047	Y	MCPH1	9606 [Organism: human] [Scientific Name: Homo sapiens]	Y	18	2WT8-B	-	-	-	-	-	-	-	-	-
3SZM	H	Q8NEM0	-	-	-	-	-	-	-	-	-	-	-	-	8	2.6	88	190	13	MOLECULE: MICROCEPHALIN;	-	-	-	-	-	-	-	-	-	-	-	-	-	IPR001357;IPR022047	Y	MCPH1	9606 [Organism: human] [Scientific Name: Homo sapiens]	Y	18	2WT8-B	-	-	-	-	-	-	-	-	-
3SZM	H	Q8NEM0	-	-	-	-	-	-	-	-	-	-	-	-	8	2.6	88	190	13	MOLECULE: MICROCEPHALIN;	-	-	-	-	-	-	-	-	-	-	-	-	-	IPR001357;IPR022047	Y	MCPH1	9606 [Organism: human] [Scientific Name: Homo sapiens]	Y	18	2WT8-B	-	-	-	-	-	-	-	-	-
3SZM	H	Q8NEM0	-	-	-	-	-	-	-	-	-	-	-	-	8	2.6	88	190	13	MOLECULE: MICROCEPHALIN;	-	-	-	-	-	-	-	-	-	-	-	-	-	IPR001357;IPR022047	Y	MCPH1	9606 [Organism: human] [Scientific Name: Homo sapiens]	Y	18	2WT8-B	-	-	-	-	-	-	-	-	-
3SZM	H	Q8NEM0	-	-	-	-	-	-	-	-	-	-	-	-	8	2.6	88	190	13	MOLECULE: MICROCEPHALIN;	-	-	-	-	-	-	-	-	-	-	-	-	-	IPR001357;IPR022047	Y	MCPH1	9606 [Organism: human] [Scientific Name: Homo sapiens]	Y	18	2WT8-B	-	-	-	-	-	-	-	-	-
3SZM	H	Q8NEM0	-	-	-	-	-	-	-	-	-	-	-	-	8	2.6	88	190	13	MOLECULE: MICROCEPHALIN;	-	-	-	-	-	-	-	-	-	-	-	-	-	IPR001357;IPR022047	Y	MCPH1	9606 [Organism: human] [Scientific Name: Homo sapiens]	Y	18	2WT8-B	-	-	-	-	-	-	-	-	-
3SZM	H	Q8NEM0	-	-	-	-	-	-	-	-	-	-	-	-	8	2.6	88	190	13	MOLECULE: MICROCEPHALIN;	-	-	-	-	-	-	-	-	-	-	-	-	-	IPR001357;IPR022047	Y	MCPH1	9606 [Organism: human] [Scientific Name: Homo sapiens]	Y	18	2WT8-B	-	-	-	-	-	-	-	-	-
3SZM	H	Q8NEM0	-	-	-	-	-	-	-	-	-	-	-	-	8	2.6	88	190	13	MOLECULE: MICROCEPHALIN;	-	-	-	-	-	-	-	-	-	-	-	-	-	IPR001357;IPR022047	Y	MCPH1	9606 [Organism: human] [Scientific Name: Homo sapiens]	Y	18	2WT8-B	-	-	-	-	-	-	-	-	-
3SZM	H	Q8NEM0	-	-	-	-	-	-	-	-	-	-	-	-	8	2.6	88	190	13	MOLECULE: MICROCEPHALIN;	-	-	-	-	-	-	-	-	-	-	-	-	-	IPR001357;IPR022047	Y	MCPH1	9606 [Organism: human] [Scientific Name: Homo sapiens]	Y	18	2WT8-B	-	-	-	-	-	-	-	-	-
3SZM	H	Q8NEM0	-	-	-	-	-	-	-	-	-	-	-	-	8	2.6	88	190	13	MOLECULE: MICROCEPHALIN;	-	-	-	-	-	-	-	-	-	-	-	-	-	IPR001357;IPR022047	Y	MCPH1	9606 [Organism: human] [Scientific Name: Homo sapiens]	Y	18	2WT8-B	-	-	-	-	-	-	-	-	-
3SZM	H	Q8NEM0	-	-	-	-	-	-	-	-	-	-	-	-	8	2.6	88	190	13	MOLECULE: MICROCEPHALIN;	-	-	-	-	-	-	-	-	-	-	-	-	-	IPR001357;IPR022047	Y	MCPH1	9606 [Organism: human] [Scientific Name: Homo sapiens]	Y	18	2WT8-B	-	-	-	-	-	-	-	-	-
3SZM	H	Q8NEM0	-	-	-	-	-	-	-	-	-	-	-	-	8	2.6	88	190	13	MOLECULE: MICROCEPHALIN;	-	-	-	-	-	-	-	-	-	-	-	-	-	IPR001357;IPR022047	Y	MCPH1	9606 [Organism: human] [Scientific Name: Homo sapiens]	Y	18	2WT8-B	-	-	-	-	-	-	-	-	-
3SZM	H	Q8NEM0	-	-	-	-	-	-	-	-	-	-	-	-	8	2.6	88	190	13	MOLECULE: MICROCEPHALIN;	-	-	-	-	-	-	-	-	-	-	-	-	-	IPR001357;IPR022047	Y	MCPH1	9606 [Organism: human] [Scientific Name: Homo sapiens]	Y	18	2WT8-B	-	-	-	-	-	-	-	-	-
3SZM	H	Q8NEM0	-	-	-	-	-	-	-	-	-	-	-	-	8	2.6	88	190	13	MOLECULE: MICROCEPHALIN;	-	-	-	-	-	-	-	-	-	-	-	-	-	IPR001357;IPR022047	Y	MCPH1	9606 [Organism: human] [Scientific Name: Homo sapiens]	Y	18	2WT8-B	-	-	-	-	-	-	-	-	-
3SZM	H	Q8NEM0	-	-	-	-	-	-	-	-	-	-	-	-	8	2.6	88	190	13	MOLECULE: MICROCEPHALIN;	-	-	-	-	-	-	-	-	-	-	-	-	-	IPR001357;IPR022047	Y	MCPH1	9606 [Organism: human] [Scientific Name: Homo sapiens]	Y	18	2WT8-B	-	-	-	-	-	-	-	-	-
3SZM	H	Q8NEM0	-	-	-	-	-	-	-	-	-	-	-	-	8	2.6	88	190	13	MOLECULE: MICROCEPHALIN;	-	-	-	-	-	-	-	-	-	-	-	-	-	IPR001357;IPR022047	Y	MCPH1	9606 [Organism: human] [Scientific Name: Homo sapiens]	Y	18	2WT8-B	-	-	-	-	-	-	-	-	-
3SZM	H	Q8NEM0	-	-	-	-	-	-	-	-	-	-	-	-	8	2.6	88	190	13	MOLECULE: MICROCEPHALIN;	-	-	-	-	-	-	-	-	-	-	-	-	-	IPR001357;IPR022047	Y	MCPH1	9606 [Organism: human] [Scientific Name: Homo sapiens]	Y	14	3U3Z-A01	-	-	-	-	-	-	-	-	-
3SZM	H	Q8NEM0	-	-	-	-	-	-	-	-	-	-	-	-	8	2.6	88	190	13	MOLECULE: MICROCEPHALIN;	-	-	-	-	-	-	-	-	-	-	-	-	-	IPR001357;IPR022047	Y	MCPH1	9606 [Organism: human] [Scientific Name: Homo sapiens]	Y	27	3U3Z-A02	-	-	-	-	-	-	-	-	-
3QVG	A	P49916	-	-	-	-	-	-	-	-	-	-	-	-	6.9	2.3	70	82	10	MOLECULE: DNA LIGASE 3;	-	-	-	-	-	-	-	-	-	-	-	-	-	IPR000977;IPR016059;IPR001510;IPR001357;IPR012340;IPR012309;IPR012310;IPR012308	Y	LIG3	9606 [Organism: human] [Scientific Name: Homo sapiens]	Y	28	3PC8-D	-	-	-	-	-	-	-	-	-
3QVG	A	P49916	-	-	-	-	-	-	-	-	-	-	-	-	6.9	2.3	70	82	10	MOLECULE: DNA LIGASE 3;	-	-	-	-	-	-	-	-	-	-	-	-	-	IPR000977;IPR016059;IPR001510;IPR001357;IPR012340;IPR012309;IPR012310;IPR012308	Y	LIG3	9606 [Organism: human] [Scientific Name: Homo sapiens]	Y	28	3PC8-D	-	-	-	-	-	-	-	-	-
3QVG	A	P49916	-	-	-	-	-	-	-	-	-	-	-	-	6.9	2.3	70	82	10	MOLECULE: DNA LIGASE 3;	-	-	-	-	-	-	-	-	-	-	-	-	-	IPR000977;IPR016059;IPR001510;IPR001357;IPR012340;IPR012309;IPR012310;IPR012308	Y	LIG3	9606 [Organism: human] [Scientific Name: Homo sapiens]	Y	28	3PC8-D	-	-	-	-	-	-	-	-	-
3QVG	A	P49916	-	-	-	-	-	-	-	-	-	-	-	-	6.9	2.3	70	82	10	MOLECULE: DNA LIGASE 3;	-	-	-	-	-	-	-	-	-	-	-	-	-	IPR000977;IPR016059;IPR001510;IPR001357;IPR012340;IPR012309;IPR012310;IPR012308	Y	LIG3	9606 [Organism: human] [Scientific Name: Homo sapiens]	Y	28	3PC8-D	-	-	-	-	-	-	-	-	-
3QVG	A	P49916	-	-	-	-	-	-	-	-	-	-	-	-	6.9	2.3	70	82	10	MOLECULE: DNA LIGASE 3;	-	-	-	-	-	-	-	-	-	-	-	-	-	IPR000977;IPR016059;IPR001510;IPR001357;IPR012340;IPR012309;IPR012310;IPR012308	Y	LIG3	9606 [Organism: human] [Scientific Name: Homo sapiens]	Y	28	3PC8-D	-	-	-	-	-	-	-	-	-
3QVG	A	P49916	-	-	-	-	-	-	-	-	-	-	-	-	6.9	2.3	70	82	10	MOLECULE: DNA LIGASE 3;	-	-	-	-	-	-	-	-	-	-	-	-	-	IPR000977;IPR016059;IPR001510;IPR001357;IPR012340;IPR012309;IPR012310;IPR012308	Y	LIG3	9606 [Organism: human] [Scientific Name: Homo sapiens]	Y	28	3PC8-D	-	-	-	-	-	-	-	-	-
3PC8	C	P49916	-	-	-	-	-	-	-	-	-	-	-	-	6.9	2.2	69	77	7	MOLECULE: DNA REPAIR PROTEIN XRCC1;	-	-	-	-	-	-	-	-	-	-	-	-	-	IPR000977;IPR016059;IPR001510;IPR001357;IPR012340;IPR012309;IPR012310;IPR012308	Y	LIG3	9606 [Organism: human] [Scientific Name: Homo sapiens]	Y	28	3PC8-D	-	-	-	-	-	-	-	-	-
3PC8	C	P49916	-	-	-	-	-	-	-	-	-	-	-	-	6.9	2.2	69	77	7	MOLECULE: DNA REPAIR PROTEIN XRCC1;	-	-	-	-	-	-	-	-	-	-	-	-	-	IPR000977;IPR016059;IPR001510;IPR001357;IPR012340;IPR012309;IPR012310;IPR012308	Y	LIG3	9606 [Organism: human] [Scientific Name: Homo sapiens]	Y	28	3PC8-D	-	-	-	-	-	-	-	-	-
3PC8	C	P49916	-	-	-	-	-	-	-	-	-	-	-	-	6.9	2.2	69	77	7	MOLECULE: DNA REPAIR PROTEIN XRCC1;	-	-	-	-	-	-	-	-	-	-	-	-	-	IPR000977;IPR016059;IPR001510;IPR001357;IPR012340;IPR012309;IPR012310;IPR012308	Y	LIG3	9606 [Organism: human] [Scientific Name: Homo sapiens]	Y	28	3PC8-D	-	-	-	-	-	-	-	-	-
3PC8	C	P49916	-	-	-	-	-	-	-	-	-	-	-	-	6.9	2.2	69	77	7	MOLECULE: DNA REPAIR PROTEIN XRCC1;	-	-	-	-	-	-	-	-	-	-	-	-	-	IPR000977;IPR016059;IPR001510;IPR001357;IPR012340;IPR012309;IPR012310;IPR012308	Y	LIG3	9606 [Organism: human] [Scientific Name: Homo sapiens]	Y	28	3PC8-D	-	-	-	-	-	-	-	-	-
3PC8	C	P49916	-	-	-	-	-	-	-	-	-	-	-	-	6.9	2.2	69	77	7	MOLECULE: DNA REPAIR PROTEIN XRCC1;	-	-	-	-	-	-	-	-	-	-	-	-	-	IPR000977;IPR016059;IPR001510;IPR001357;IPR012340;IPR012309;IPR012310;IPR012308	Y	LIG3	9606 [Organism: human] [Scientific Name: Homo sapiens]	Y	28	3PC8-D	-	-	-	-	-	-	-	-	-
3PC8	C	P49916	-	-	-	-	-	-	-	-	-	-	-	-	6.9	2.2	69	77	7	MOLECULE: DNA REPAIR PROTEIN XRCC1;	-	-	-	-	-	-	-	-	-	-	-	-	-	IPR000977;IPR016059;IPR001510;IPR001357;IPR012340;IPR012309;IPR012310;IPR012308	Y	LIG3	9606 [Organism: human] [Scientific Name: Homo sapiens]	Y	28	3PC8-D	-	-	-	-	-	-	-	-	-
3QVG	C	P49916	-	-	-	-	-	-	-	-	-	-	-	-	6.9	2.3	69	77	7	MOLECULE: DNA LIGASE 3;	-	-	-	-	-	-	-	-	-	-	-	-	-	IPR000977;IPR016059;IPR001510;IPR001357;IPR012340;IPR012309;IPR012310;IPR012308	Y	LIG3	9606 [Organism: human] [Scientific Name: Homo sapiens]	Y	28	3PC8-D	-	-	-	-	-	-	-	-	-
3QVG	C	P49916	-	-	-	-	-	-	-	-	-	-	-	-	6.9	2.3	69	77	7	MOLECULE: DNA LIGASE 3;	-	-	-	-	-	-	-	-	-	-	-	-	-	IPR000977;IPR016059;IPR001510;IPR001357;IPR012340;IPR012309;IPR012310;IPR012308	Y	LIG3	9606 [Organism: human] [Scientific Name: Homo sapiens]	Y	28	3PC8-D	-	-	-	-	-	-	-	-	-
3QVG	C	P49916	-	-	-	-	-	-	-	-	-	-	-	-	6.9	2.3	69	77	7	MOLECULE: DNA LIGASE 3;	-	-	-	-	-	-	-	-	-	-	-	-	-	IPR000977;IPR016059;IPR001510;IPR001357;IPR012340;IPR012309;IPR012310;IPR012308	Y	LIG3	9606 [Organism: human] [Scientific Name: Homo sapiens]	Y	28	3PC8-D	-	-	-	-	-	-	-	-	-
3QVG	C	P49916	-	-	-	-	-	-	-	-	-	-	-	-	6.9	2.3	69	77	7	MOLECULE: DNA LIGASE 3;	-	-	-	-	-	-	-	-	-	-	-	-	-	IPR000977;IPR016059;IPR001510;IPR001357;IPR012340;IPR012309;IPR012310;IPR012308	Y	LIG3	9606 [Organism: human] [Scientific Name: Homo sapiens]	Y	28	3PC8-D	-	-	-	-	-	-	-	-	-
3QVG	C	P49916	-	-	-	-	-	-	-	-	-	-	-	-	6.9	2.3	69	77	7	MOLECULE: DNA LIGASE 3;	-	-	-	-	-	-	-	-	-	-	-	-	-	IPR000977;IPR016059;IPR001510;IPR001357;IPR012340;IPR012309;IPR012310;IPR012308	Y	LIG3	9606 [Organism: human] [Scientific Name: Homo sapiens]	Y	28	3PC8-D	-	-	-	-	-	-	-	-	-
3QVG	C	P49916	-	-	-	-	-	-	-	-	-	-	-	-	6.9	2.3	69	77	7	MOLECULE: DNA LIGASE 3;	-	-	-	-	-	-	-	-	-	-	-	-	-	IPR000977;IPR016059;IPR001510;IPR001357;IPR012340;IPR012309;IPR012310;IPR012308	Y	LIG3	9606 [Organism: human] [Scientific Name: Homo sapiens]	Y	28	3PC8-D	-	-	-	-	-	-	-	-	-
3PC8	D	P49916	-	-	-	-	-	-	-	-	-	-	-	-	6.7	2.2	69	78	7	MOLECULE: DNA REPAIR PROTEIN XRCC1;	-	-	-	-	-	-	-	-	-	-	-	-	-	IPR000977;IPR016059;IPR001510;IPR001357;IPR012340;IPR012309;IPR012310;IPR012308	Y	LIG3	9606 [Organism: human] [Scientific Name: Homo sapiens]	Y	28	3PC8-D	-	-	-	-	-	-	-	-	-
3PC8	D	P49916	-	-	-	-	-	-	-	-	-	-	-	-	6.7	2.2	69	78	7	MOLECULE: DNA REPAIR PROTEIN XRCC1;	-	-	-	-	-	-	-	-	-	-	-	-	-	IPR000977;IPR016059;IPR001510;IPR001357;IPR012340;IPR012309;IPR012310;IPR012308	Y	LIG3	9606 [Organism: human] [Scientific Name: Homo sapiens]	Y	28	3PC8-D	-	-	-	-	-	-	-	-	-
3PC8	D	P49916	-	-	-	-	-	-	-	-	-	-	-	-	6.7	2.2	69	78	7	MOLECULE: DNA REPAIR PROTEIN XRCC1;	-	-	-	-	-	-	-	-	-	-	-	-	-	IPR000977;IPR016059;IPR001510;IPR001357;IPR012340;IPR012309;IPR012310;IPR012308	Y	LIG3	9606 [Organism: human] [Scientific Name: Homo sapiens]	Y	28	3PC8-D	-	-	-	-	-	-	-	-	-
3PC8	D	P49916	-	-	-	-	-	-	-	-	-	-	-	-	6.7	2.2	69	78	7	MOLECULE: DNA REPAIR PROTEIN XRCC1;	-	-	-	-	-	-	-	-	-	-	-	-	-	IPR000977;IPR016059;IPR001510;IPR001357;IPR012340;IPR012309;IPR012310;IPR012308	Y	LIG3	9606 [Organism: human] [Scientific Name: Homo sapiens]	Y	28	3PC8-D	-	-	-	-	-	-	-	-	-
3PC8	D	P49916	-	-	-	-	-	-	-	-	-	-	-	-	6.7	2.2	69	78	7	MOLECULE: DNA REPAIR PROTEIN XRCC1;	-	-	-	-	-	-	-	-	-	-	-	-	-	IPR000977;IPR016059;IPR001510;IPR001357;IPR012340;IPR012309;IPR012310;IPR012308	Y	LIG3	9606 [Organism: human] [Scientific Name: Homo sapiens]	Y	28	3PC8-D	-	-	-	-	-	-	-	-	-
3PC8	D	P49916	-	-	-	-	-	-	-	-	-	-	-	-	6.7	2.2	69	78	7	MOLECULE: DNA REPAIR PROTEIN XRCC1;	-	-	-	-	-	-	-	-	-	-	-	-	-	IPR000977;IPR016059;IPR001510;IPR001357;IPR012340;IPR012309;IPR012310;IPR012308	Y	LIG3	9606 [Organism: human] [Scientific Name: Homo sapiens]	Y	28	3PC8-D	-	-	-	-	-	-	-	-	-
3PC7	B	P49916	-	-	-	-	-	-	-	-	-	-	-	-	6.2	2.4	68	77	7	MOLECULE: DNA LIGASE 3;	-	-	-	-	-	-	-	-	-	-	-	-	-	IPR000977;IPR016059;IPR001510;IPR001357;IPR012340;IPR012309;IPR012310;IPR012308	Y	LIG3	9606 [Organism: human] [Scientific Name: Homo sapiens]	Y	28	3PC8-D	-	-	-	-	-	-	-	-	-
3PC7	B	P49916	-	-	-	-	-	-	-	-	-	-	-	-	6.2	2.4	68	77	7	MOLECULE: DNA LIGASE 3;	-	-	-	-	-	-	-	-	-	-	-	-	-	IPR000977;IPR016059;IPR001510;IPR001357;IPR012340;IPR012309;IPR012310;IPR012308	Y	LIG3	9606 [Organism: human] [Scientific Name: Homo sapiens]	Y	28	3PC8-D	-	-	-	-	-	-	-	-	-
3PC7	B	P49916	-	-	-	-	-	-	-	-	-	-	-	-	6.2	2.4	68	77	7	MOLECULE: DNA LIGASE 3;	-	-	-	-	-	-	-	-	-	-	-	-	-	IPR000977;IPR016059;IPR001510;IPR001357;IPR012340;IPR012309;IPR012310;IPR012308	Y	LIG3	9606 [Organism: human] [Scientific Name: Homo sapiens]	Y	28	3PC8-D	-	-	-	-	-	-	-	-	-
3PC7	B	P49916	-	-	-	-	-	-	-	-	-	-	-	-	6.2	2.4	68	77	7	MOLECULE: DNA LIGASE 3;	-	-	-	-	-	-	-	-	-	-	-	-	-	IPR000977;IPR016059;IPR001510;IPR001357;IPR012340;IPR012309;IPR012310;IPR012308	Y	LIG3	9606 [Organism: human] [Scientific Name: Homo sapiens]	Y	28	3PC8-D	-	-	-	-	-	-	-	-	-
3PC7	B	P49916	-	-	-	-	-	-	-	-	-	-	-	-	6.2	2.4	68	77	7	MOLECULE: DNA LIGASE 3;	-	-	-	-	-	-	-	-	-	-	-	-	-	IPR000977;IPR016059;IPR001510;IPR001357;IPR012340;IPR012309;IPR012310;IPR012308	Y	LIG3	9606 [Organism: human] [Scientific Name: Homo sapiens]	Y	28	3PC8-D	-	-	-	-	-	-	-	-	-
3PC7	B	P49916	-	-	-	-	-	-	-	-	-	-	-	-	6.2	2.4	68	77	7	MOLECULE: DNA LIGASE 3;	-	-	-	-	-	-	-	-	-	-	-	-	-	IPR000977;IPR016059;IPR001510;IPR001357;IPR012340;IPR012309;IPR012310;IPR012308	Y	LIG3	9606 [Organism: human] [Scientific Name: Homo sapiens]	Y	28	3PC8-D	-	-	-	-	-	-	-	-	-
3PC7	A	P49916	-	-	-	-	-	-	-	-	-	-	-	-	6.2	2.3	69	81	7	MOLECULE: DNA LIGASE 3;	-	-	-	-	-	-	-	-	-	-	-	-	-	IPR000977;IPR016059;IPR001510;IPR001357;IPR012340;IPR012309;IPR012310;IPR012308	Y	LIG3	9606 [Organism: human] [Scientific Name: Homo sapiens]	Y	28	3PC8-D	23	36.45	45.49	0.3833	0.4784	0.698	2.51	74	76
3PC7	A	P49916	-	-	-	-	-	-	-	-	-	-	-	-	6.2	2.3	69	81	7	MOLECULE: DNA LIGASE 3;	-	-	-	-	-	-	-	-	-	-	-	-	-	IPR000977;IPR016059;IPR001510;IPR001357;IPR012340;IPR012309;IPR012310;IPR012308	Y	LIG3	9606 [Organism: human] [Scientific Name: Homo sapiens]	Y	28	3PC8-D	23	36.45	45.49	0.3833	0.4784	0.698	2.51	74	76
3PC7	A	P49916	-	-	-	-	-	-	-	-	-	-	-	-	6.2	2.3	69	81	7	MOLECULE: DNA LIGASE 3;	-	-	-	-	-	-	-	-	-	-	-	-	-	IPR000977;IPR016059;IPR001510;IPR001357;IPR012340;IPR012309;IPR012310;IPR012308	Y	LIG3	9606 [Organism: human] [Scientific Name: Homo sapiens]	Y	28	3PC8-D	23	36.45	45.49	0.3833	0.4784	0.698	2.51	74	76
3PC7	A	P49916	-	-	-	-	-	-	-	-	-	-	-	-	6.2	2.3	69	81	7	MOLECULE: DNA LIGASE 3;	-	-	-	-	-	-	-	-	-	-	-	-	-	IPR000977;IPR016059;IPR001510;IPR001357;IPR012340;IPR012309;IPR012310;IPR012308	Y	LIG3	9606 [Organism: human] [Scientific Name: Homo sapiens]	Y	28	3PC8-D	23	36.45	45.49	0.3833	0.4784	0.698	2.51	74	76
3PC7	A	P49916	-	-	-	-	-	-	-	-	-	-	-	-	6.2	2.3	69	81	7	MOLECULE: DNA LIGASE 3;	-	-	-	-	-	-	-	-	-	-	-	-	-	IPR000977;IPR016059;IPR001510;IPR001357;IPR012340;IPR012309;IPR012310;IPR012308	Y	LIG3	9606 [Organism: human] [Scientific Name: Homo sapiens]	Y	28	3PC8-D	23	36.45	45.49	0.3833	0.4784	0.698	2.51	74	76
3PC7	A	P49916	-	-	-	-	-	-	-	-	-	-	-	-	6.2	2.3	69	81	7	MOLECULE: DNA LIGASE 3;	-	-	-	-	-	-	-	-	-	-	-	-	-	IPR000977;IPR016059;IPR001510;IPR001357;IPR012340;IPR012309;IPR012310;IPR012308	Y	LIG3	9606 [Organism: human] [Scientific Name: Homo sapiens]	Y	28	3PC8-D	23	36.45	45.49	0.3833	0.4784	0.698	2.51	74	76
1IN1	A	P49916	-	-	-	-	-	-	-	-	-	-	-	-	5.8	2.2	68	88	7	MOLECULE: DNA LIGASE III;	-	-	-	-	-	-	-	-	-	-	-	-	-	IPR000977;IPR016059;IPR001510;IPR001357;IPR012340;IPR012309;IPR012310;IPR012308	Y	LIG3	9606 [Organism: human] [Scientific Name: Homo sapiens]	Y	28	3PC8-D	-	-	-	-	-	-	-	-	-
1IN1	A	P49916	-	-	-	-	-	-	-	-	-	-	-	-	5.8	2.2	68	88	7	MOLECULE: DNA LIGASE III;	-	-	-	-	-	-	-	-	-	-	-	-	-	IPR000977;IPR016059;IPR001510;IPR001357;IPR012340;IPR012309;IPR012310;IPR012308	Y	LIG3	9606 [Organism: human] [Scientific Name: Homo sapiens]	Y	28	3PC8-D	-	-	-	-	-	-	-	-	-
1IN1	A	P49916	-	-	-	-	-	-	-	-	-	-	-	-	5.8	2.2	68	88	7	MOLECULE: DNA LIGASE III;	-	-	-	-	-	-	-	-	-	-	-	-	-	IPR000977;IPR016059;IPR001510;IPR001357;IPR012340;IPR012309;IPR012310;IPR012308	Y	LIG3	9606 [Organism: human] [Scientific Name: Homo sapiens]	Y	28	3PC8-D	-	-	-	-	-	-	-	-	-
1IN1	A	P49916	-	-	-	-	-	-	-	-	-	-	-	-	5.8	2.2	68	88	7	MOLECULE: DNA LIGASE III;	-	-	-	-	-	-	-	-	-	-	-	-	-	IPR000977;IPR016059;IPR001510;IPR001357;IPR012340;IPR012309;IPR012310;IPR012308	Y	LIG3	9606 [Organism: human] [Scientific Name: Homo sapiens]	Y	28	3PC8-D	-	-	-	-	-	-	-	-	-
1IN1	A	P49916	-	-	-	-	-	-	-	-	-	-	-	-	5.8	2.2	68	88	7	MOLECULE: DNA LIGASE III;	-	-	-	-	-	-	-	-	-	-	-	-	-	IPR000977;IPR016059;IPR001510;IPR001357;IPR012340;IPR012309;IPR012310;IPR012308	Y	LIG3	9606 [Organism: human] [Scientific Name: Homo sapiens]	Y	28	3PC8-D	-	-	-	-	-	-	-	-	-
1IN1	A	P49916	-	-	-	-	-	-	-	-	-	-	-	-	5.8	2.2	68	88	7	MOLECULE: DNA LIGASE III;	-	-	-	-	-	-	-	-	-	-	-	-	-	IPR000977;IPR016059;IPR001510;IPR001357;IPR012340;IPR012309;IPR012310;IPR012308	Y	LIG3	9606 [Organism: human] [Scientific Name: Homo sapiens]	Y	28	3PC8-D	-	-	-	-	-	-	-	-	-
1IMO	A	P49916	-	-	-	-	-	-	-	-	-	-	-	-	5.7	2.3	68	88	9	MOLECULE: DNA LIGASE III;	-	-	-	-	-	-	-	-	-	-	-	-	-	IPR000977;IPR016059;IPR001510;IPR001357;IPR012340;IPR012309;IPR012310;IPR012308	Y	LIG3	9606 [Organism: human] [Scientific Name: Homo sapiens]	Y	28	3PC8-D	-	-	-	-	-	-	-	-	-
1IMO	A	P49916	-	-	-	-	-	-	-	-	-	-	-	-	5.7	2.3	68	88	9	MOLECULE: DNA LIGASE III;	-	-	-	-	-	-	-	-	-	-	-	-	-	IPR000977;IPR016059;IPR001510;IPR001357;IPR012340;IPR012309;IPR012310;IPR012308	Y	LIG3	9606 [Organism: human] [Scientific Name: Homo sapiens]	Y	28	3PC8-D	-	-	-	-	-	-	-	-	-
1IMO	A	P49916	-	-	-	-	-	-	-	-	-	-	-	-	5.7	2.3	68	88	9	MOLECULE: DNA LIGASE III;	-	-	-	-	-	-	-	-	-	-	-	-	-	IPR000977;IPR016059;IPR001510;IPR001357;IPR012340;IPR012309;IPR012310;IPR012308	Y	LIG3	9606 [Organism: human] [Scientific Name: Homo sapiens]	Y	28	3PC8-D	-	-	-	-	-	-	-	-	-
1IMO	A	P49916	-	-	-	-	-	-	-	-	-	-	-	-	5.7	2.3	68	88	9	MOLECULE: DNA LIGASE III;	-	-	-	-	-	-	-	-	-	-	-	-	-	IPR000977;IPR016059;IPR001510;IPR001357;IPR012340;IPR012309;IPR012310;IPR012308	Y	LIG3	9606 [Organism: human] [Scientific Name: Homo sapiens]	Y	28	3PC8-D	-	-	-	-	-	-	-	-	-
1IMO	A	P49916	-	-	-	-	-	-	-	-	-	-	-	-	5.7	2.3	68	88	9	MOLECULE: DNA LIGASE III;	-	-	-	-	-	-	-	-	-	-	-	-	-	IPR000977;IPR016059;IPR001510;IPR001357;IPR012340;IPR012309;IPR012310;IPR012308	Y	LIG3	9606 [Organism: human] [Scientific Name: Homo sapiens]	Y	28	3PC8-D	-	-	-	-	-	-	-	-	-
1IMO	A	P49916	-	-	-	-	-	-	-	-	-	-	-	-	5.7	2.3	68	88	9	MOLECULE: DNA LIGASE III;	-	-	-	-	-	-	-	-	-	-	-	-	-	IPR000977;IPR016059;IPR001510;IPR001357;IPR012340;IPR012309;IPR012310;IPR012308	Y	LIG3	9606 [Organism: human] [Scientific Name: Homo sapiens]	Y	28	3PC8-D	-	-	-	-	-	-	-	-	-
2EP8	A	O00541	-	-	-	-	-	-	-	-	-	-	-	-	6.9	2.2	74	100	11	MOLECULE: PESCADILLO HOMOLOG 1;	-	-	-	-	-	-	-	-	-	-	-	-	-	IPR001357;IPR010613	Y	PES1	9606 [Organism: human] [Scientific Name: Homo sapiens]	Y	17	2EP8-A	-	-	-	-	-	-	-	-	-
2EP8	A	O00541	-	-	-	-	-	-	-	-	-	-	-	-	6.9	2.2	74	100	11	MOLECULE: PESCADILLO HOMOLOG 1;	-	-	-	-	-	-	-	-	-	-	-	-	-	IPR001357;IPR010613	Y	PES1	9606 [Organism: human] [Scientific Name: Homo sapiens]	Y	17	2EP8-A	-	-	-	-	-	-	-	-	-
3PXC	X	P38398	-	-	-	-	-	-	-	-	-	-	-	-	8.8	2.8	85	206	11	MOLECULE: BREAST CANCER TYPE 1 SUSCEPTIBILITY PROTEIN;	-	-	-	-	-	-	-	-	-	-	-	-	-	IPR001357;IPR018957;IPR001841;IPR025994;IPR017907;IPR013083;IPR011364	Y	BRCA1	9606 [Organism: human] [Scientific Name: Homo sapiens]	Y	5	1T15-A02	-	-	-	-	-	-	-	-	-
3PXC	X	P38398	-	-	-	-	-	-	-	-	-	-	-	-	8.8	2.8	85	206	11	MOLECULE: BREAST CANCER TYPE 1 SUSCEPTIBILITY PROTEIN;	-	-	-	-	-	-	-	-	-	-	-	-	-	IPR001357;IPR018957;IPR001841;IPR025994;IPR017907;IPR013083;IPR011364	Y	BRCA1	9606 [Organism: human] [Scientific Name: Homo sapiens]	Y	3	1T15-A01	-	-	-	-	-	-	-	-	-
3PXC	X	P38398	-	-	-	-	-	-	-	-	-	-	-	-	8.8	2.8	85	206	11	MOLECULE: BREAST CANCER TYPE 1 SUSCEPTIBILITY PROTEIN;	-	-	-	-	-	-	-	-	-	-	-	-	-	IPR001357;IPR018957;IPR001841;IPR025994;IPR017907;IPR013083;IPR011364	Y	BRCA1	9606 [Organism: human] [Scientific Name: Homo sapiens]	Y	5	1T15-A02	-	-	-	-	-	-	-	-	-
3PXC	X	P38398	-	-	-	-	-	-	-	-	-	-	-	-	8.8	2.8	85	206	11	MOLECULE: BREAST CANCER TYPE 1 SUSCEPTIBILITY PROTEIN;	-	-	-	-	-	-	-	-	-	-	-	-	-	IPR001357;IPR018957;IPR001841;IPR025994;IPR017907;IPR013083;IPR011364	Y	BRCA1	9606 [Organism: human] [Scientific Name: Homo sapiens]	Y	5	1T15-A02	-	-	-	-	-	-	-	-	-
3PXC	X	P38398	-	-	-	-	-	-	-	-	-	-	-	-	8.8	2.8	85	206	11	MOLECULE: BREAST CANCER TYPE 1 SUSCEPTIBILITY PROTEIN;	-	-	-	-	-	-	-	-	-	-	-	-	-	IPR001357;IPR018957;IPR001841;IPR025994;IPR017907;IPR013083;IPR011364	Y	BRCA1	9606 [Organism: human] [Scientific Name: Homo sapiens]	Y	3	1T15-A01	-	-	-	-	-	-	-	-	-
3PXC	X	P38398	-	-	-	-	-	-	-	-	-	-	-	-	8.8	2.8	85	206	11	MOLECULE: BREAST CANCER TYPE 1 SUSCEPTIBILITY PROTEIN;	-	-	-	-	-	-	-	-	-	-	-	-	-	IPR001357;IPR018957;IPR001841;IPR025994;IPR017907;IPR013083;IPR011364	Y	BRCA1	9606 [Organism: human] [Scientific Name: Homo sapiens]	Y	5	1T15-A02	-	-	-	-	-	-	-	-	-
3PXC	X	P38398	-	-	-	-	-	-	-	-	-	-	-	-	8.8	2.8	85	206	11	MOLECULE: BREAST CANCER TYPE 1 SUSCEPTIBILITY PROTEIN;	-	-	-	-	-	-	-	-	-	-	-	-	-	IPR001357;IPR018957;IPR001841;IPR025994;IPR017907;IPR013083;IPR011364	Y	BRCA1	9606 [Organism: human] [Scientific Name: Homo sapiens]	Y	5	1T15-A02	-	-	-	-	-	-	-	-	-
3PXC	X	P38398	-	-	-	-	-	-	-	-	-	-	-	-	8.8	2.8	85	206	11	MOLECULE: BREAST CANCER TYPE 1 SUSCEPTIBILITY PROTEIN;	-	-	-	-	-	-	-	-	-	-	-	-	-	IPR001357;IPR018957;IPR001841;IPR025994;IPR017907;IPR013083;IPR011364	Y	BRCA1	9606 [Organism: human] [Scientific Name: Homo sapiens]	Y	3	1T15-A01	-	-	-	-	-	-	-	-	-
3PXC	X	P38398	-	-	-	-	-	-	-	-	-	-	-	-	8.8	2.8	85	206	11	MOLECULE: BREAST CANCER TYPE 1 SUSCEPTIBILITY PROTEIN;	-	-	-	-	-	-	-	-	-	-	-	-	-	IPR001357;IPR018957;IPR001841;IPR025994;IPR017907;IPR013083;IPR011364	Y	BRCA1	9606 [Organism: human] [Scientific Name: Homo sapiens]	Y	5	1T15-A02	-	-	-	-	-	-	-	-	-
3PXC	X	P38398	-	-	-	-	-	-	-	-	-	-	-	-	8.8	2.8	85	206	11	MOLECULE: BREAST CANCER TYPE 1 SUSCEPTIBILITY PROTEIN;	-	-	-	-	-	-	-	-	-	-	-	-	-	IPR001357;IPR018957;IPR001841;IPR025994;IPR017907;IPR013083;IPR011364	Y	BRCA1	9606 [Organism: human] [Scientific Name: Homo sapiens]	Y	5	1T15-A02	-	-	-	-	-	-	-	-	-
3PXC	X	P38398	-	-	-	-	-	-	-	-	-	-	-	-	8.8	2.8	85	206	11	MOLECULE: BREAST CANCER TYPE 1 SUSCEPTIBILITY PROTEIN;	-	-	-	-	-	-	-	-	-	-	-	-	-	IPR001357;IPR018957;IPR001841;IPR025994;IPR017907;IPR013083;IPR011364	Y	BRCA1	9606 [Organism: human] [Scientific Name: Homo sapiens]	Y	3	1T15-A01	-	-	-	-	-	-	-	-	-
3PXC	X	P38398	-	-	-	-	-	-	-	-	-	-	-	-	8.8	2.8	85	206	11	MOLECULE: BREAST CANCER TYPE 1 SUSCEPTIBILITY PROTEIN;	-	-	-	-	-	-	-	-	-	-	-	-	-	IPR001357;IPR018957;IPR001841;IPR025994;IPR017907;IPR013083;IPR011364	Y	BRCA1	9606 [Organism: human] [Scientific Name: Homo sapiens]	Y	5	1T15-A02	-	-	-	-	-	-	-	-	-
3PXC	X	P38398	-	-	-	-	-	-	-	-	-	-	-	-	8.8	2.8	85	206	11	MOLECULE: BREAST CANCER TYPE 1 SUSCEPTIBILITY PROTEIN;	-	-	-	-	-	-	-	-	-	-	-	-	-	IPR001357;IPR018957;IPR001841;IPR025994;IPR017907;IPR013083;IPR011364	Y	BRCA1	9606 [Organism: human] [Scientific Name: Homo sapiens]	Y	5	1T15-A02	-	-	-	-	-	-	-	-	-
3PXC	X	P38398	-	-	-	-	-	-	-	-	-	-	-	-	8.8	2.8	85	206	11	MOLECULE: BREAST CANCER TYPE 1 SUSCEPTIBILITY PROTEIN;	-	-	-	-	-	-	-	-	-	-	-	-	-	IPR001357;IPR018957;IPR001841;IPR025994;IPR017907;IPR013083;IPR011364	Y	BRCA1	9606 [Organism: human] [Scientific Name: Homo sapiens]	Y	3	1T15-A01	-	-	-	-	-	-	-	-	-
3PXC	X	P38398	-	-	-	-	-	-	-	-	-	-	-	-	8.8	2.8	85	206	11	MOLECULE: BREAST CANCER TYPE 1 SUSCEPTIBILITY PROTEIN;	-	-	-	-	-	-	-	-	-	-	-	-	-	IPR001357;IPR018957;IPR001841;IPR025994;IPR017907;IPR013083;IPR011364	Y	BRCA1	9606 [Organism: human] [Scientific Name: Homo sapiens]	Y	5	1T15-A02	-	-	-	-	-	-	-	-	-
1Y98	A	P38398	-	-	-	-	-	-	-	-	-	-	-	-	8.7	2.6	85	211	11	MOLECULE: BREAST CANCER TYPE 1 SUSCEPTIBILITY PROTEIN;	-	-	-	-	-	-	-	-	-	-	-	-	-	IPR001357;IPR018957;IPR001841;IPR025994;IPR017907;IPR013083;IPR011364	Y	BRCA1	9606 [Organism: human] [Scientific Name: Homo sapiens]	Y	5	1T15-A02	-	-	-	-	-	-	-	-	-
1Y98	A	P38398	-	-	-	-	-	-	-	-	-	-	-	-	8.7	2.6	85	211	11	MOLECULE: BREAST CANCER TYPE 1 SUSCEPTIBILITY PROTEIN;	-	-	-	-	-	-	-	-	-	-	-	-	-	IPR001357;IPR018957;IPR001841;IPR025994;IPR017907;IPR013083;IPR011364	Y	BRCA1	9606 [Organism: human] [Scientific Name: Homo sapiens]	Y	3	1T15-A01	-	-	-	-	-	-	-	-	-
1Y98	A	P38398	-	-	-	-	-	-	-	-	-	-	-	-	8.7	2.6	85	211	11	MOLECULE: BREAST CANCER TYPE 1 SUSCEPTIBILITY PROTEIN;	-	-	-	-	-	-	-	-	-	-	-	-	-	IPR001357;IPR018957;IPR001841;IPR025994;IPR017907;IPR013083;IPR011364	Y	BRCA1	9606 [Organism: human] [Scientific Name: Homo sapiens]	Y	5	1T15-A02	-	-	-	-	-	-	-	-	-
1Y98	A	P38398	-	-	-	-	-	-	-	-	-	-	-	-	8.7	2.6	85	211	11	MOLECULE: BREAST CANCER TYPE 1 SUSCEPTIBILITY PROTEIN;	-	-	-	-	-	-	-	-	-	-	-	-	-	IPR001357;IPR018957;IPR001841;IPR025994;IPR017907;IPR013083;IPR011364	Y	BRCA1	9606 [Organism: human] [Scientific Name: Homo sapiens]	Y	5	1T15-A02	-	-	-	-	-	-	-	-	-
1Y98	A	P38398	-	-	-	-	-	-	-	-	-	-	-	-	8.7	2.6	85	211	11	MOLECULE: BREAST CANCER TYPE 1 SUSCEPTIBILITY PROTEIN;	-	-	-	-	-	-	-	-	-	-	-	-	-	IPR001357;IPR018957;IPR001841;IPR025994;IPR017907;IPR013083;IPR011364	Y	BRCA1	9606 [Organism: human] [Scientific Name: Homo sapiens]	Y	3	1T15-A01	-	-	-	-	-	-	-	-	-
1Y98	A	P38398	-	-	-	-	-	-	-	-	-	-	-	-	8.7	2.6	85	211	11	MOLECULE: BREAST CANCER TYPE 1 SUSCEPTIBILITY PROTEIN;	-	-	-	-	-	-	-	-	-	-	-	-	-	IPR001357;IPR018957;IPR001841;IPR025994;IPR017907;IPR013083;IPR011364	Y	BRCA1	9606 [Organism: human] [Scientific Name: Homo sapiens]	Y	5	1T15-A02	-	-	-	-	-	-	-	-	-
1Y98	A	P38398	-	-	-	-	-	-	-	-	-	-	-	-	8.7	2.6	85	211	11	MOLECULE: BREAST CANCER TYPE 1 SUSCEPTIBILITY PROTEIN;	-	-	-	-	-	-	-	-	-	-	-	-	-	IPR001357;IPR018957;IPR001841;IPR025994;IPR017907;IPR013083;IPR011364	Y	BRCA1	9606 [Organism: human] [Scientific Name: Homo sapiens]	Y	5	1T15-A02	-	-	-	-	-	-	-	-	-
1Y98	A	P38398	-	-	-	-	-	-	-	-	-	-	-	-	8.7	2.6	85	211	11	MOLECULE: BREAST CANCER TYPE 1 SUSCEPTIBILITY PROTEIN;	-	-	-	-	-	-	-	-	-	-	-	-	-	IPR001357;IPR018957;IPR001841;IPR025994;IPR017907;IPR013083;IPR011364	Y	BRCA1	9606 [Organism: human] [Scientific Name: Homo sapiens]	Y	3	1T15-A01	-	-	-	-	-	-	-	-	-
1Y98	A	P38398	-	-	-	-	-	-	-	-	-	-	-	-	8.7	2.6	85	211	11	MOLECULE: BREAST CANCER TYPE 1 SUSCEPTIBILITY PROTEIN;	-	-	-	-	-	-	-	-	-	-	-	-	-	IPR001357;IPR018957;IPR001841;IPR025994;IPR017907;IPR013083;IPR011364	Y	BRCA1	9606 [Organism: human] [Scientific Name: Homo sapiens]	Y	5	1T15-A02	-	-	-	-	-	-	-	-	-
1Y98	A	P38398	-	-	-	-	-	-	-	-	-	-	-	-	8.7	2.6	85	211	11	MOLECULE: BREAST CANCER TYPE 1 SUSCEPTIBILITY PROTEIN;	-	-	-	-	-	-	-	-	-	-	-	-	-	IPR001357;IPR018957;IPR001841;IPR025994;IPR017907;IPR013083;IPR011364	Y	BRCA1	9606 [Organism: human] [Scientific Name: Homo sapiens]	Y	5	1T15-A02	-	-	-	-	-	-	-	-	-
1Y98	A	P38398	-	-	-	-	-	-	-	-	-	-	-	-	8.7	2.6	85	211	11	MOLECULE: BREAST CANCER TYPE 1 SUSCEPTIBILITY PROTEIN;	-	-	-	-	-	-	-	-	-	-	-	-	-	IPR001357;IPR018957;IPR001841;IPR025994;IPR017907;IPR013083;IPR011364	Y	BRCA1	9606 [Organism: human] [Scientific Name: Homo sapiens]	Y	3	1T15-A01	-	-	-	-	-	-	-	-	-
1Y98	A	P38398	-	-	-	-	-	-	-	-	-	-	-	-	8.7	2.6	85	211	11	MOLECULE: BREAST CANCER TYPE 1 SUSCEPTIBILITY PROTEIN;	-	-	-	-	-	-	-	-	-	-	-	-	-	IPR001357;IPR018957;IPR001841;IPR025994;IPR017907;IPR013083;IPR011364	Y	BRCA1	9606 [Organism: human] [Scientific Name: Homo sapiens]	Y	5	1T15-A02	-	-	-	-	-	-	-	-	-
1Y98	A	P38398	-	-	-	-	-	-	-	-	-	-	-	-	8.7	2.6	85	211	11	MOLECULE: BREAST CANCER TYPE 1 SUSCEPTIBILITY PROTEIN;	-	-	-	-	-	-	-	-	-	-	-	-	-	IPR001357;IPR018957;IPR001841;IPR025994;IPR017907;IPR013083;IPR011364	Y	BRCA1	9606 [Organism: human] [Scientific Name: Homo sapiens]	Y	5	1T15-A02	-	-	-	-	-	-	-	-	-
1Y98	A	P38398	-	-	-	-	-	-	-	-	-	-	-	-	8.7	2.6	85	211	11	MOLECULE: BREAST CANCER TYPE 1 SUSCEPTIBILITY PROTEIN;	-	-	-	-	-	-	-	-	-	-	-	-	-	IPR001357;IPR018957;IPR001841;IPR025994;IPR017907;IPR013083;IPR011364	Y	BRCA1	9606 [Organism: human] [Scientific Name: Homo sapiens]	Y	3	1T15-A01	-	-	-	-	-	-	-	-	-
1Y98	A	P38398	-	-	-	-	-	-	-	-	-	-	-	-	8.7	2.6	85	211	11	MOLECULE: BREAST CANCER TYPE 1 SUSCEPTIBILITY PROTEIN;	-	-	-	-	-	-	-	-	-	-	-	-	-	IPR001357;IPR018957;IPR001841;IPR025994;IPR017907;IPR013083;IPR011364	Y	BRCA1	9606 [Organism: human] [Scientific Name: Homo sapiens]	Y	5	1T15-A02	-	-	-	-	-	-	-	-	-
3PXB	A	P38398	-	-	-	-	-	-	-	-	-	-	-	-	8.6	2.8	85	208	11	MOLECULE: BREAST CANCER TYPE 1 SUSCEPTIBILITY PROTEIN;	-	-	-	-	-	-	-	-	-	-	-	-	-	IPR001357;IPR018957;IPR001841;IPR025994;IPR017907;IPR013083;IPR011364	Y	BRCA1	9606 [Organism: human] [Scientific Name: Homo sapiens]	Y	5	1T15-A02	-	-	-	-	-	-	-	-	-
3PXB	A	P38398	-	-	-	-	-	-	-	-	-	-	-	-	8.6	2.8	85	208	11	MOLECULE: BREAST CANCER TYPE 1 SUSCEPTIBILITY PROTEIN;	-	-	-	-	-	-	-	-	-	-	-	-	-	IPR001357;IPR018957;IPR001841;IPR025994;IPR017907;IPR013083;IPR011364	Y	BRCA1	9606 [Organism: human] [Scientific Name: Homo sapiens]	Y	3	1T15-A01	-	-	-	-	-	-	-	-	-
3PXB	A	P38398	-	-	-	-	-	-	-	-	-	-	-	-	8.6	2.8	85	208	11	MOLECULE: BREAST CANCER TYPE 1 SUSCEPTIBILITY PROTEIN;	-	-	-	-	-	-	-	-	-	-	-	-	-	IPR001357;IPR018957;IPR001841;IPR025994;IPR017907;IPR013083;IPR011364	Y	BRCA1	9606 [Organism: human] [Scientific Name: Homo sapiens]	Y	5	1T15-A02	-	-	-	-	-	-	-	-	-
3PXB	A	P38398	-	-	-	-	-	-	-	-	-	-	-	-	8.6	2.8	85	208	11	MOLECULE: BREAST CANCER TYPE 1 SUSCEPTIBILITY PROTEIN;	-	-	-	-	-	-	-	-	-	-	-	-	-	IPR001357;IPR018957;IPR001841;IPR025994;IPR017907;IPR013083;IPR011364	Y	BRCA1	9606 [Organism: human] [Scientific Name: Homo sapiens]	Y	5	1T15-A02	-	-	-	-	-	-	-	-	-
3PXB	A	P38398	-	-	-	-	-	-	-	-	-	-	-	-	8.6	2.8	85	208	11	MOLECULE: BREAST CANCER TYPE 1 SUSCEPTIBILITY PROTEIN;	-	-	-	-	-	-	-	-	-	-	-	-	-	IPR001357;IPR018957;IPR001841;IPR025994;IPR017907;IPR013083;IPR011364	Y	BRCA1	9606 [Organism: human] [Scientific Name: Homo sapiens]	Y	3	1T15-A01	-	-	-	-	-	-	-	-	-
3PXB	A	P38398	-	-	-	-	-	-	-	-	-	-	-	-	8.6	2.8	85	208	11	MOLECULE: BREAST CANCER TYPE 1 SUSCEPTIBILITY PROTEIN;	-	-	-	-	-	-	-	-	-	-	-	-	-	IPR001357;IPR018957;IPR001841;IPR025994;IPR017907;IPR013083;IPR011364	Y	BRCA1	9606 [Organism: human] [Scientific Name: Homo sapiens]	Y	5	1T15-A02	-	-	-	-	-	-	-	-	-
3PXB	A	P38398	-	-	-	-	-	-	-	-	-	-	-	-	8.6	2.8	85	208	11	MOLECULE: BREAST CANCER TYPE 1 SUSCEPTIBILITY PROTEIN;	-	-	-	-	-	-	-	-	-	-	-	-	-	IPR001357;IPR018957;IPR001841;IPR025994;IPR017907;IPR013083;IPR011364	Y	BRCA1	9606 [Organism: human] [Scientific Name: Homo sapiens]	Y	5	1T15-A02	-	-	-	-	-	-	-	-	-
3PXB	A	P38398	-	-	-	-	-	-	-	-	-	-	-	-	8.6	2.8	85	208	11	MOLECULE: BREAST CANCER TYPE 1 SUSCEPTIBILITY PROTEIN;	-	-	-	-	-	-	-	-	-	-	-	-	-	IPR001357;IPR018957;IPR001841;IPR025994;IPR017907;IPR013083;IPR011364	Y	BRCA1	9606 [Organism: human] [Scientific Name: Homo sapiens]	Y	3	1T15-A01	-	-	-	-	-	-	-	-	-
3PXB	A	P38398	-	-	-	-	-	-	-	-	-	-	-	-	8.6	2.8	85	208	11	MOLECULE: BREAST CANCER TYPE 1 SUSCEPTIBILITY PROTEIN;	-	-	-	-	-	-	-	-	-	-	-	-	-	IPR001357;IPR018957;IPR001841;IPR025994;IPR017907;IPR013083;IPR011364	Y	BRCA1	9606 [Organism: human] [Scientific Name: Homo sapiens]	Y	5	1T15-A02	-	-	-	-	-	-	-	-	-
3PXB	A	P38398	-	-	-	-	-	-	-	-	-	-	-	-	8.6	2.8	85	208	11	MOLECULE: BREAST CANCER TYPE 1 SUSCEPTIBILITY PROTEIN;	-	-	-	-	-	-	-	-	-	-	-	-	-	IPR001357;IPR018957;IPR001841;IPR025994;IPR017907;IPR013083;IPR011364	Y	BRCA1	9606 [Organism: human] [Scientific Name: Homo sapiens]	Y	5	1T15-A02	-	-	-	-	-	-	-	-	-
3PXB	A	P38398	-	-	-	-	-	-	-	-	-	-	-	-	8.6	2.8	85	208	11	MOLECULE: BREAST CANCER TYPE 1 SUSCEPTIBILITY PROTEIN;	-	-	-	-	-	-	-	-	-	-	-	-	-	IPR001357;IPR018957;IPR001841;IPR025994;IPR017907;IPR013083;IPR011364	Y	BRCA1	9606 [Organism: human] [Scientific Name: Homo sapiens]	Y	3	1T15-A01	-	-	-	-	-	-	-	-	-
3PXB	A	P38398	-	-	-	-	-	-	-	-	-	-	-	-	8.6	2.8	85	208	11	MOLECULE: BREAST CANCER TYPE 1 SUSCEPTIBILITY PROTEIN;	-	-	-	-	-	-	-	-	-	-	-	-	-	IPR001357;IPR018957;IPR001841;IPR025994;IPR017907;IPR013083;IPR011364	Y	BRCA1	9606 [Organism: human] [Scientific Name: Homo sapiens]	Y	5	1T15-A02	-	-	-	-	-	-	-	-	-
3PXB	A	P38398	-	-	-	-	-	-	-	-	-	-	-	-	8.6	2.8	85	208	11	MOLECULE: BREAST CANCER TYPE 1 SUSCEPTIBILITY PROTEIN;	-	-	-	-	-	-	-	-	-	-	-	-	-	IPR001357;IPR018957;IPR001841;IPR025994;IPR017907;IPR013083;IPR011364	Y	BRCA1	9606 [Organism: human] [Scientific Name: Homo sapiens]	Y	5	1T15-A02	-	-	-	-	-	-	-	-	-
3PXB	A	P38398	-	-	-	-	-	-	-	-	-	-	-	-	8.6	2.8	85	208	11	MOLECULE: BREAST CANCER TYPE 1 SUSCEPTIBILITY PROTEIN;	-	-	-	-	-	-	-	-	-	-	-	-	-	IPR001357;IPR018957;IPR001841;IPR025994;IPR017907;IPR013083;IPR011364	Y	BRCA1	9606 [Organism: human] [Scientific Name: Homo sapiens]	Y	3	1T15-A01	-	-	-	-	-	-	-	-	-
3PXB	A	P38398	-	-	-	-	-	-	-	-	-	-	-	-	8.6	2.8	85	208	11	MOLECULE: BREAST CANCER TYPE 1 SUSCEPTIBILITY PROTEIN;	-	-	-	-	-	-	-	-	-	-	-	-	-	IPR001357;IPR018957;IPR001841;IPR025994;IPR017907;IPR013083;IPR011364	Y	BRCA1	9606 [Organism: human] [Scientific Name: Homo sapiens]	Y	5	1T15-A02	-	-	-	-	-	-	-	-	-
3PXE	B	P38398	-	-	-	-	-	-	-	-	-	-	-	-	8.5	2.8	85	213	11	MOLECULE: BREAST CANCER TYPE 1 SUSCEPTIBILITY PROTEIN;	-	-	-	-	-	-	-	-	-	-	-	-	-	IPR001357;IPR018957;IPR001841;IPR025994;IPR017907;IPR013083;IPR011364	Y	BRCA1	9606 [Organism: human] [Scientific Name: Homo sapiens]	Y	5	1T15-A02	-	-	-	-	-	-	-	-	-
3PXE	B	P38398	-	-	-	-	-	-	-	-	-	-	-	-	8.5	2.8	85	213	11	MOLECULE: BREAST CANCER TYPE 1 SUSCEPTIBILITY PROTEIN;	-	-	-	-	-	-	-	-	-	-	-	-	-	IPR001357;IPR018957;IPR001841;IPR025994;IPR017907;IPR013083;IPR011364	Y	BRCA1	9606 [Organism: human] [Scientific Name: Homo sapiens]	Y	3	1T15-A01	-	-	-	-	-	-	-	-	-
3PXE	B	P38398	-	-	-	-	-	-	-	-	-	-	-	-	8.5	2.8	85	213	11	MOLECULE: BREAST CANCER TYPE 1 SUSCEPTIBILITY PROTEIN;	-	-	-	-	-	-	-	-	-	-	-	-	-	IPR001357;IPR018957;IPR001841;IPR025994;IPR017907;IPR013083;IPR011364	Y	BRCA1	9606 [Organism: human] [Scientific Name: Homo sapiens]	Y	5	1T15-A02	-	-	-	-	-	-	-	-	-
3PXE	B	P38398	-	-	-	-	-	-	-	-	-	-	-	-	8.5	2.8	85	213	11	MOLECULE: BREAST CANCER TYPE 1 SUSCEPTIBILITY PROTEIN;	-	-	-	-	-	-	-	-	-	-	-	-	-	IPR001357;IPR018957;IPR001841;IPR025994;IPR017907;IPR013083;IPR011364	Y	BRCA1	9606 [Organism: human] [Scientific Name: Homo sapiens]	Y	5	1T15-A02	-	-	-	-	-	-	-	-	-
3PXE	B	P38398	-	-	-	-	-	-	-	-	-	-	-	-	8.5	2.8	85	213	11	MOLECULE: BREAST CANCER TYPE 1 SUSCEPTIBILITY PROTEIN;	-	-	-	-	-	-	-	-	-	-	-	-	-	IPR001357;IPR018957;IPR001841;IPR025994;IPR017907;IPR013083;IPR011364	Y	BRCA1	9606 [Organism: human] [Scientific Name: Homo sapiens]	Y	3	1T15-A01	-	-	-	-	-	-	-	-	-
3PXE	B	P38398	-	-	-	-	-	-	-	-	-	-	-	-	8.5	2.8	85	213	11	MOLECULE: BREAST CANCER TYPE 1 SUSCEPTIBILITY PROTEIN;	-	-	-	-	-	-	-	-	-	-	-	-	-	IPR001357;IPR018957;IPR001841;IPR025994;IPR017907;IPR013083;IPR011364	Y	BRCA1	9606 [Organism: human] [Scientific Name: Homo sapiens]	Y	5	1T15-A02	-	-	-	-	-	-	-	-	-
3PXE	B	P38398	-	-	-	-	-	-	-	-	-	-	-	-	8.5	2.8	85	213	11	MOLECULE: BREAST CANCER TYPE 1 SUSCEPTIBILITY PROTEIN;	-	-	-	-	-	-	-	-	-	-	-	-	-	IPR001357;IPR018957;IPR001841;IPR025994;IPR017907;IPR013083;IPR011364	Y	BRCA1	9606 [Organism: human] [Scientific Name: Homo sapiens]	Y	5	1T15-A02	-	-	-	-	-	-	-	-	-
3PXE	B	P38398	-	-	-	-	-	-	-	-	-	-	-	-	8.5	2.8	85	213	11	MOLECULE: BREAST CANCER TYPE 1 SUSCEPTIBILITY PROTEIN;	-	-	-	-	-	-	-	-	-	-	-	-	-	IPR001357;IPR018957;IPR001841;IPR025994;IPR017907;IPR013083;IPR011364	Y	BRCA1	9606 [Organism: human] [Scientific Name: Homo sapiens]	Y	3	1T15-A01	-	-	-	-	-	-	-	-	-
3PXE	B	P38398	-	-	-	-	-	-	-	-	-	-	-	-	8.5	2.8	85	213	11	MOLECULE: BREAST CANCER TYPE 1 SUSCEPTIBILITY PROTEIN;	-	-	-	-	-	-	-	-	-	-	-	-	-	IPR001357;IPR018957;IPR001841;IPR025994;IPR017907;IPR013083;IPR011364	Y	BRCA1	9606 [Organism: human] [Scientific Name: Homo sapiens]	Y	5	1T15-A02	-	-	-	-	-	-	-	-	-
3PXE	B	P38398	-	-	-	-	-	-	-	-	-	-	-	-	8.5	2.8	85	213	11	MOLECULE: BREAST CANCER TYPE 1 SUSCEPTIBILITY PROTEIN;	-	-	-	-	-	-	-	-	-	-	-	-	-	IPR001357;IPR018957;IPR001841;IPR025994;IPR017907;IPR013083;IPR011364	Y	BRCA1	9606 [Organism: human] [Scientific Name: Homo sapiens]	Y	5	1T15-A02	-	-	-	-	-	-	-	-	-
3PXE	B	P38398	-	-	-	-	-	-	-	-	-	-	-	-	8.5	2.8	85	213	11	MOLECULE: BREAST CANCER TYPE 1 SUSCEPTIBILITY PROTEIN;	-	-	-	-	-	-	-	-	-	-	-	-	-	IPR001357;IPR018957;IPR001841;IPR025994;IPR017907;IPR013083;IPR011364	Y	BRCA1	9606 [Organism: human] [Scientific Name: Homo sapiens]	Y	3	1T15-A01	-	-	-	-	-	-	-	-	-
3PXE	B	P38398	-	-	-	-	-	-	-	-	-	-	-	-	8.5	2.8	85	213	11	MOLECULE: BREAST CANCER TYPE 1 SUSCEPTIBILITY PROTEIN;	-	-	-	-	-	-	-	-	-	-	-	-	-	IPR001357;IPR018957;IPR001841;IPR025994;IPR017907;IPR013083;IPR011364	Y	BRCA1	9606 [Organism: human] [Scientific Name: Homo sapiens]	Y	5	1T15-A02	-	-	-	-	-	-	-	-	-
3PXE	B	P38398	-	-	-	-	-	-	-	-	-	-	-	-	8.5	2.8	85	213	11	MOLECULE: BREAST CANCER TYPE 1 SUSCEPTIBILITY PROTEIN;	-	-	-	-	-	-	-	-	-	-	-	-	-	IPR001357;IPR018957;IPR001841;IPR025994;IPR017907;IPR013083;IPR011364	Y	BRCA1	9606 [Organism: human] [Scientific Name: Homo sapiens]	Y	5	1T15-A02	-	-	-	-	-	-	-	-	-
3PXE	B	P38398	-	-	-	-	-	-	-	-	-	-	-	-	8.5	2.8	85	213	11	MOLECULE: BREAST CANCER TYPE 1 SUSCEPTIBILITY PROTEIN;	-	-	-	-	-	-	-	-	-	-	-	-	-	IPR001357;IPR018957;IPR001841;IPR025994;IPR017907;IPR013083;IPR011364	Y	BRCA1	9606 [Organism: human] [Scientific Name: Homo sapiens]	Y	3	1T15-A01	-	-	-	-	-	-	-	-	-
3PXE	B	P38398	-	-	-	-	-	-	-	-	-	-	-	-	8.5	2.8	85	213	11	MOLECULE: BREAST CANCER TYPE 1 SUSCEPTIBILITY PROTEIN;	-	-	-	-	-	-	-	-	-	-	-	-	-	IPR001357;IPR018957;IPR001841;IPR025994;IPR017907;IPR013083;IPR011364	Y	BRCA1	9606 [Organism: human] [Scientific Name: Homo sapiens]	Y	5	1T15-A02	-	-	-	-	-	-	-	-	-
4IFI	A	P38398	-	-	-	-	-	-	-	-	-	-	-	-	8.3	2.9	89	211	15	MOLECULE: BREAST CANCER TYPE 1 SUSCEPTIBILITY PROTEIN;	-	-	-	-	-	-	-	-	-	-	-	-	-	IPR001357;IPR018957;IPR001841;IPR025994;IPR017907;IPR013083;IPR011364	Y	BRCA1	9606 [Organism: human] [Scientific Name: Homo sapiens]	Y	5	1T15-A02	-	-	-	-	-	-	-	-	-
4IFI	A	P38398	-	-	-	-	-	-	-	-	-	-	-	-	8.3	2.9	89	211	15	MOLECULE: BREAST CANCER TYPE 1 SUSCEPTIBILITY PROTEIN;	-	-	-	-	-	-	-	-	-	-	-	-	-	IPR001357;IPR018957;IPR001841;IPR025994;IPR017907;IPR013083;IPR011364	Y	BRCA1	9606 [Organism: human] [Scientific Name: Homo sapiens]	Y	3	1T15-A01	-	-	-	-	-	-	-	-	-
4IFI	A	P38398	-	-	-	-	-	-	-	-	-	-	-	-	8.3	2.9	89	211	15	MOLECULE: BREAST CANCER TYPE 1 SUSCEPTIBILITY PROTEIN;	-	-	-	-	-	-	-	-	-	-	-	-	-	IPR001357;IPR018957;IPR001841;IPR025994;IPR017907;IPR013083;IPR011364	Y	BRCA1	9606 [Organism: human] [Scientific Name: Homo sapiens]	Y	5	1T15-A02	-	-	-	-	-	-	-	-	-
4IFI	A	P38398	-	-	-	-	-	-	-	-	-	-	-	-	8.3	2.9	89	211	15	MOLECULE: BREAST CANCER TYPE 1 SUSCEPTIBILITY PROTEIN;	-	-	-	-	-	-	-	-	-	-	-	-	-	IPR001357;IPR018957;IPR001841;IPR025994;IPR017907;IPR013083;IPR011364	Y	BRCA1	9606 [Organism: human] [Scientific Name: Homo sapiens]	Y	5	1T15-A02	-	-	-	-	-	-	-	-	-
4IFI	A	P38398	-	-	-	-	-	-	-	-	-	-	-	-	8.3	2.9	89	211	15	MOLECULE: BREAST CANCER TYPE 1 SUSCEPTIBILITY PROTEIN;	-	-	-	-	-	-	-	-	-	-	-	-	-	IPR001357;IPR018957;IPR001841;IPR025994;IPR017907;IPR013083;IPR011364	Y	BRCA1	9606 [Organism: human] [Scientific Name: Homo sapiens]	Y	3	1T15-A01	-	-	-	-	-	-	-	-	-
4IFI	A	P38398	-	-	-	-	-	-	-	-	-	-	-	-	8.3	2.9	89	211	15	MOLECULE: BREAST CANCER TYPE 1 SUSCEPTIBILITY PROTEIN;	-	-	-	-	-	-	-	-	-	-	-	-	-	IPR001357;IPR018957;IPR001841;IPR025994;IPR017907;IPR013083;IPR011364	Y	BRCA1	9606 [Organism: human] [Scientific Name: Homo sapiens]	Y	5	1T15-A02	-	-	-	-	-	-	-	-	-
4IFI	A	P38398	-	-	-	-	-	-	-	-	-	-	-	-	8.3	2.9	89	211	15	MOLECULE: BREAST CANCER TYPE 1 SUSCEPTIBILITY PROTEIN;	-	-	-	-	-	-	-	-	-	-	-	-	-	IPR001357;IPR018957;IPR001841;IPR025994;IPR017907;IPR013083;IPR011364	Y	BRCA1	9606 [Organism: human] [Scientific Name: Homo sapiens]	Y	5	1T15-A02	-	-	-	-	-	-	-	-	-
4IFI	A	P38398	-	-	-	-	-	-	-	-	-	-	-	-	8.3	2.9	89	211	15	MOLECULE: BREAST CANCER TYPE 1 SUSCEPTIBILITY PROTEIN;	-	-	-	-	-	-	-	-	-	-	-	-	-	IPR001357;IPR018957;IPR001841;IPR025994;IPR017907;IPR013083;IPR011364	Y	BRCA1	9606 [Organism: human] [Scientific Name: Homo sapiens]	Y	3	1T15-A01	-	-	-	-	-	-	-	-	-
4IFI	A	P38398	-	-	-	-	-	-	-	-	-	-	-	-	8.3	2.9	89	211	15	MOLECULE: BREAST CANCER TYPE 1 SUSCEPTIBILITY PROTEIN;	-	-	-	-	-	-	-	-	-	-	-	-	-	IPR001357;IPR018957;IPR001841;IPR025994;IPR017907;IPR013083;IPR011364	Y	BRCA1	9606 [Organism: human] [Scientific Name: Homo sapiens]	Y	5	1T15-A02	-	-	-	-	-	-	-	-	-
4IFI	A	P38398	-	-	-	-	-	-	-	-	-	-	-	-	8.3	2.9	89	211	15	MOLECULE: BREAST CANCER TYPE 1 SUSCEPTIBILITY PROTEIN;	-	-	-	-	-	-	-	-	-	-	-	-	-	IPR001357;IPR018957;IPR001841;IPR025994;IPR017907;IPR013083;IPR011364	Y	BRCA1	9606 [Organism: human] [Scientific Name: Homo sapiens]	Y	5	1T15-A02	-	-	-	-	-	-	-	-	-
4IFI	A	P38398	-	-	-	-	-	-	-	-	-	-	-	-	8.3	2.9	89	211	15	MOLECULE: BREAST CANCER TYPE 1 SUSCEPTIBILITY PROTEIN;	-	-	-	-	-	-	-	-	-	-	-	-	-	IPR001357;IPR018957;IPR001841;IPR025994;IPR017907;IPR013083;IPR011364	Y	BRCA1	9606 [Organism: human] [Scientific Name: Homo sapiens]	Y	3	1T15-A01	-	-	-	-	-	-	-	-	-
4IFI	A	P38398	-	-	-	-	-	-	-	-	-	-	-	-	8.3	2.9	89	211	15	MOLECULE: BREAST CANCER TYPE 1 SUSCEPTIBILITY PROTEIN;	-	-	-	-	-	-	-	-	-	-	-	-	-	IPR001357;IPR018957;IPR001841;IPR025994;IPR017907;IPR013083;IPR011364	Y	BRCA1	9606 [Organism: human] [Scientific Name: Homo sapiens]	Y	5	1T15-A02	-	-	-	-	-	-	-	-	-
4IFI	A	P38398	-	-	-	-	-	-	-	-	-	-	-	-	8.3	2.9	89	211	15	MOLECULE: BREAST CANCER TYPE 1 SUSCEPTIBILITY PROTEIN;	-	-	-	-	-	-	-	-	-	-	-	-	-	IPR001357;IPR018957;IPR001841;IPR025994;IPR017907;IPR013083;IPR011364	Y	BRCA1	9606 [Organism: human] [Scientific Name: Homo sapiens]	Y	5	1T15-A02	-	-	-	-	-	-	-	-	-
4IFI	A	P38398	-	-	-	-	-	-	-	-	-	-	-	-	8.3	2.9	89	211	15	MOLECULE: BREAST CANCER TYPE 1 SUSCEPTIBILITY PROTEIN;	-	-	-	-	-	-	-	-	-	-	-	-	-	IPR001357;IPR018957;IPR001841;IPR025994;IPR017907;IPR013083;IPR011364	Y	BRCA1	9606 [Organism: human] [Scientific Name: Homo sapiens]	Y	3	1T15-A01	-	-	-	-	-	-	-	-	-
4IFI	A	P38398	-	-	-	-	-	-	-	-	-	-	-	-	8.3	2.9	89	211	15	MOLECULE: BREAST CANCER TYPE 1 SUSCEPTIBILITY PROTEIN;	-	-	-	-	-	-	-	-	-	-	-	-	-	IPR001357;IPR018957;IPR001841;IPR025994;IPR017907;IPR013083;IPR011364	Y	BRCA1	9606 [Organism: human] [Scientific Name: Homo sapiens]	Y	5	1T15-A02	-	-	-	-	-	-	-	-	-
1N5O	X	P38398	-	-	-	-	-	-	-	-	-	-	-	-	8.3	3	90	207	16	MOLECULE: BREAST CANCER TYPE 1 SUSCEPTIBILITY PROTEIN;	-	-	-	-	-	-	-	-	-	-	-	-	-	IPR001357;IPR018957;IPR001841;IPR025994;IPR017907;IPR013083;IPR011364	Y	BRCA1	9606 [Organism: human] [Scientific Name: Homo sapiens]	Y	5	1T15-A02	-	-	-	-	-	-	-	-	-
1N5O	X	P38398	-	-	-	-	-	-	-	-	-	-	-	-	8.3	3	90	207	16	MOLECULE: BREAST CANCER TYPE 1 SUSCEPTIBILITY PROTEIN;	-	-	-	-	-	-	-	-	-	-	-	-	-	IPR001357;IPR018957;IPR001841;IPR025994;IPR017907;IPR013083;IPR011364	Y	BRCA1	9606 [Organism: human] [Scientific Name: Homo sapiens]	Y	3	1T15-A01	-	-	-	-	-	-	-	-	-
1N5O	X	P38398	-	-	-	-	-	-	-	-	-	-	-	-	8.3	3	90	207	16	MOLECULE: BREAST CANCER TYPE 1 SUSCEPTIBILITY PROTEIN;	-	-	-	-	-	-	-	-	-	-	-	-	-	IPR001357;IPR018957;IPR001841;IPR025994;IPR017907;IPR013083;IPR011364	Y	BRCA1	9606 [Organism: human] [Scientific Name: Homo sapiens]	Y	5	1T15-A02	-	-	-	-	-	-	-	-	-
1N5O	X	P38398	-	-	-	-	-	-	-	-	-	-	-	-	8.3	3	90	207	16	MOLECULE: BREAST CANCER TYPE 1 SUSCEPTIBILITY PROTEIN;	-	-	-	-	-	-	-	-	-	-	-	-	-	IPR001357;IPR018957;IPR001841;IPR025994;IPR017907;IPR013083;IPR011364	Y	BRCA1	9606 [Organism: human] [Scientific Name: Homo sapiens]	Y	5	1T15-A02	-	-	-	-	-	-	-	-	-
1N5O	X	P38398	-	-	-	-	-	-	-	-	-	-	-	-	8.3	3	90	207	16	MOLECULE: BREAST CANCER TYPE 1 SUSCEPTIBILITY PROTEIN;	-	-	-	-	-	-	-	-	-	-	-	-	-	IPR001357;IPR018957;IPR001841;IPR025994;IPR017907;IPR013083;IPR011364	Y	BRCA1	9606 [Organism: human] [Scientific Name: Homo sapiens]	Y	3	1T15-A01	-	-	-	-	-	-	-	-	-
1N5O	X	P38398	-	-	-	-	-	-	-	-	-	-	-	-	8.3	3	90	207	16	MOLECULE: BREAST CANCER TYPE 1 SUSCEPTIBILITY PROTEIN;	-	-	-	-	-	-	-	-	-	-	-	-	-	IPR001357;IPR018957;IPR001841;IPR025994;IPR017907;IPR013083;IPR011364	Y	BRCA1	9606 [Organism: human] [Scientific Name: Homo sapiens]	Y	5	1T15-A02	-	-	-	-	-	-	-	-	-
1N5O	X	P38398	-	-	-	-	-	-	-	-	-	-	-	-	8.3	3	90	207	16	MOLECULE: BREAST CANCER TYPE 1 SUSCEPTIBILITY PROTEIN;	-	-	-	-	-	-	-	-	-	-	-	-	-	IPR001357;IPR018957;IPR001841;IPR025994;IPR017907;IPR013083;IPR011364	Y	BRCA1	9606 [Organism: human] [Scientific Name: Homo sapiens]	Y	5	1T15-A02	-	-	-	-	-	-	-	-	-
1N5O	X	P38398	-	-	-	-	-	-	-	-	-	-	-	-	8.3	3	90	207	16	MOLECULE: BREAST CANCER TYPE 1 SUSCEPTIBILITY PROTEIN;	-	-	-	-	-	-	-	-	-	-	-	-	-	IPR001357;IPR018957;IPR001841;IPR025994;IPR017907;IPR013083;IPR011364	Y	BRCA1	9606 [Organism: human] [Scientific Name: Homo sapiens]	Y	3	1T15-A01	-	-	-	-	-	-	-	-	-
1N5O	X	P38398	-	-	-	-	-	-	-	-	-	-	-	-	8.3	3	90	207	16	MOLECULE: BREAST CANCER TYPE 1 SUSCEPTIBILITY PROTEIN;	-	-	-	-	-	-	-	-	-	-	-	-	-	IPR001357;IPR018957;IPR001841;IPR025994;IPR017907;IPR013083;IPR011364	Y	BRCA1	9606 [Organism: human] [Scientific Name: Homo sapiens]	Y	5	1T15-A02	-	-	-	-	-	-	-	-	-
1N5O	X	P38398	-	-	-	-	-	-	-	-	-	-	-	-	8.3	3	90	207	16	MOLECULE: BREAST CANCER TYPE 1 SUSCEPTIBILITY PROTEIN;	-	-	-	-	-	-	-	-	-	-	-	-	-	IPR001357;IPR018957;IPR001841;IPR025994;IPR017907;IPR013083;IPR011364	Y	BRCA1	9606 [Organism: human] [Scientific Name: Homo sapiens]	Y	5	1T15-A02	-	-	-	-	-	-	-	-	-
1N5O	X	P38398	-	-	-	-	-	-	-	-	-	-	-	-	8.3	3	90	207	16	MOLECULE: BREAST CANCER TYPE 1 SUSCEPTIBILITY PROTEIN;	-	-	-	-	-	-	-	-	-	-	-	-	-	IPR001357;IPR018957;IPR001841;IPR025994;IPR017907;IPR013083;IPR011364	Y	BRCA1	9606 [Organism: human] [Scientific Name: Homo sapiens]	Y	3	1T15-A01	-	-	-	-	-	-	-	-	-
1N5O	X	P38398	-	-	-	-	-	-	-	-	-	-	-	-	8.3	3	90	207	16	MOLECULE: BREAST CANCER TYPE 1 SUSCEPTIBILITY PROTEIN;	-	-	-	-	-	-	-	-	-	-	-	-	-	IPR001357;IPR018957;IPR001841;IPR025994;IPR017907;IPR013083;IPR011364	Y	BRCA1	9606 [Organism: human] [Scientific Name: Homo sapiens]	Y	5	1T15-A02	-	-	-	-	-	-	-	-	-
1N5O	X	P38398	-	-	-	-	-	-	-	-	-	-	-	-	8.3	3	90	207	16	MOLECULE: BREAST CANCER TYPE 1 SUSCEPTIBILITY PROTEIN;	-	-	-	-	-	-	-	-	-	-	-	-	-	IPR001357;IPR018957;IPR001841;IPR025994;IPR017907;IPR013083;IPR011364	Y	BRCA1	9606 [Organism: human] [Scientific Name: Homo sapiens]	Y	5	1T15-A02	-	-	-	-	-	-	-	-	-
1N5O	X	P38398	-	-	-	-	-	-	-	-	-	-	-	-	8.3	3	90	207	16	MOLECULE: BREAST CANCER TYPE 1 SUSCEPTIBILITY PROTEIN;	-	-	-	-	-	-	-	-	-	-	-	-	-	IPR001357;IPR018957;IPR001841;IPR025994;IPR017907;IPR013083;IPR011364	Y	BRCA1	9606 [Organism: human] [Scientific Name: Homo sapiens]	Y	3	1T15-A01	-	-	-	-	-	-	-	-	-
1N5O	X	P38398	-	-	-	-	-	-	-	-	-	-	-	-	8.3	3	90	207	16	MOLECULE: BREAST CANCER TYPE 1 SUSCEPTIBILITY PROTEIN;	-	-	-	-	-	-	-	-	-	-	-	-	-	IPR001357;IPR018957;IPR001841;IPR025994;IPR017907;IPR013083;IPR011364	Y	BRCA1	9606 [Organism: human] [Scientific Name: Homo sapiens]	Y	5	1T15-A02	-	-	-	-	-	-	-	-	-
1T2U	A	P38398	-	-	-	-	-	-	-	-	-	-	-	-	8.2	2.9	88	207	16	MOLECULE: BREAST CANCER TYPE 1 SUSCEPTIBILITY PROTEIN;	-	-	-	-	-	-	-	-	-	-	-	-	-	IPR001357;IPR018957;IPR001841;IPR025994;IPR017907;IPR013083;IPR011364	Y	BRCA1	9606 [Organism: human] [Scientific Name: Homo sapiens]	Y	5	1T15-A02	-	-	-	-	-	-	-	-	-
1T2U	A	P38398	-	-	-	-	-	-	-	-	-	-	-	-	8.2	2.9	88	207	16	MOLECULE: BREAST CANCER TYPE 1 SUSCEPTIBILITY PROTEIN;	-	-	-	-	-	-	-	-	-	-	-	-	-	IPR001357;IPR018957;IPR001841;IPR025994;IPR017907;IPR013083;IPR011364	Y	BRCA1	9606 [Organism: human] [Scientific Name: Homo sapiens]	Y	3	1T15-A01	-	-	-	-	-	-	-	-	-
1T2U	A	P38398	-	-	-	-	-	-	-	-	-	-	-	-	8.2	2.9	88	207	16	MOLECULE: BREAST CANCER TYPE 1 SUSCEPTIBILITY PROTEIN;	-	-	-	-	-	-	-	-	-	-	-	-	-	IPR001357;IPR018957;IPR001841;IPR025994;IPR017907;IPR013083;IPR011364	Y	BRCA1	9606 [Organism: human] [Scientific Name: Homo sapiens]	Y	5	1T15-A02	-	-	-	-	-	-	-	-	-
1T2U	A	P38398	-	-	-	-	-	-	-	-	-	-	-	-	8.2	2.9	88	207	16	MOLECULE: BREAST CANCER TYPE 1 SUSCEPTIBILITY PROTEIN;	-	-	-	-	-	-	-	-	-	-	-	-	-	IPR001357;IPR018957;IPR001841;IPR025994;IPR017907;IPR013083;IPR011364	Y	BRCA1	9606 [Organism: human] [Scientific Name: Homo sapiens]	Y	5	1T15-A02	-	-	-	-	-	-	-	-	-
1T2U	A	P38398	-	-	-	-	-	-	-	-	-	-	-	-	8.2	2.9	88	207	16	MOLECULE: BREAST CANCER TYPE 1 SUSCEPTIBILITY PROTEIN;	-	-	-	-	-	-	-	-	-	-	-	-	-	IPR001357;IPR018957;IPR001841;IPR025994;IPR017907;IPR013083;IPR011364	Y	BRCA1	9606 [Organism: human] [Scientific Name: Homo sapiens]	Y	3	1T15-A01	-	-	-	-	-	-	-	-	-
1T2U	A	P38398	-	-	-	-	-	-	-	-	-	-	-	-	8.2	2.9	88	207	16	MOLECULE: BREAST CANCER TYPE 1 SUSCEPTIBILITY PROTEIN;	-	-	-	-	-	-	-	-	-	-	-	-	-	IPR001357;IPR018957;IPR001841;IPR025994;IPR017907;IPR013083;IPR011364	Y	BRCA1	9606 [Organism: human] [Scientific Name: Homo sapiens]	Y	5	1T15-A02	-	-	-	-	-	-	-	-	-
1T2U	A	P38398	-	-	-	-	-	-	-	-	-	-	-	-	8.2	2.9	88	207	16	MOLECULE: BREAST CANCER TYPE 1 SUSCEPTIBILITY PROTEIN;	-	-	-	-	-	-	-	-	-	-	-	-	-	IPR001357;IPR018957;IPR001841;IPR025994;IPR017907;IPR013083;IPR011364	Y	BRCA1	9606 [Organism: human] [Scientific Name: Homo sapiens]	Y	5	1T15-A02	-	-	-	-	-	-	-	-	-
1T2U	A	P38398	-	-	-	-	-	-	-	-	-	-	-	-	8.2	2.9	88	207	16	MOLECULE: BREAST CANCER TYPE 1 SUSCEPTIBILITY PROTEIN;	-	-	-	-	-	-	-	-	-	-	-	-	-	IPR001357;IPR018957;IPR001841;IPR025994;IPR017907;IPR013083;IPR011364	Y	BRCA1	9606 [Organism: human] [Scientific Name: Homo sapiens]	Y	3	1T15-A01	-	-	-	-	-	-	-	-	-
1T2U	A	P38398	-	-	-	-	-	-	-	-	-	-	-	-	8.2	2.9	88	207	16	MOLECULE: BREAST CANCER TYPE 1 SUSCEPTIBILITY PROTEIN;	-	-	-	-	-	-	-	-	-	-	-	-	-	IPR001357;IPR018957;IPR001841;IPR025994;IPR017907;IPR013083;IPR011364	Y	BRCA1	9606 [Organism: human] [Scientific Name: Homo sapiens]	Y	5	1T15-A02	-	-	-	-	-	-	-	-	-
1T2U	A	P38398	-	-	-	-	-	-	-	-	-	-	-	-	8.2	2.9	88	207	16	MOLECULE: BREAST CANCER TYPE 1 SUSCEPTIBILITY PROTEIN;	-	-	-	-	-	-	-	-	-	-	-	-	-	IPR001357;IPR018957;IPR001841;IPR025994;IPR017907;IPR013083;IPR011364	Y	BRCA1	9606 [Organism: human] [Scientific Name: Homo sapiens]	Y	5	1T15-A02	-	-	-	-	-	-	-	-	-
1T2U	A	P38398	-	-	-	-	-	-	-	-	-	-	-	-	8.2	2.9	88	207	16	MOLECULE: BREAST CANCER TYPE 1 SUSCEPTIBILITY PROTEIN;	-	-	-	-	-	-	-	-	-	-	-	-	-	IPR001357;IPR018957;IPR001841;IPR025994;IPR017907;IPR013083;IPR011364	Y	BRCA1	9606 [Organism: human] [Scientific Name: Homo sapiens]	Y	3	1T15-A01	-	-	-	-	-	-	-	-	-
1T2U	A	P38398	-	-	-	-	-	-	-	-	-	-	-	-	8.2	2.9	88	207	16	MOLECULE: BREAST CANCER TYPE 1 SUSCEPTIBILITY PROTEIN;	-	-	-	-	-	-	-	-	-	-	-	-	-	IPR001357;IPR018957;IPR001841;IPR025994;IPR017907;IPR013083;IPR011364	Y	BRCA1	9606 [Organism: human] [Scientific Name: Homo sapiens]	Y	5	1T15-A02	-	-	-	-	-	-	-	-	-
1T2U	A	P38398	-	-	-	-	-	-	-	-	-	-	-	-	8.2	2.9	88	207	16	MOLECULE: BREAST CANCER TYPE 1 SUSCEPTIBILITY PROTEIN;	-	-	-	-	-	-	-	-	-	-	-	-	-	IPR001357;IPR018957;IPR001841;IPR025994;IPR017907;IPR013083;IPR011364	Y	BRCA1	9606 [Organism: human] [Scientific Name: Homo sapiens]	Y	5	1T15-A02	-	-	-	-	-	-	-	-	-
1T2U	A	P38398	-	-	-	-	-	-	-	-	-	-	-	-	8.2	2.9	88	207	16	MOLECULE: BREAST CANCER TYPE 1 SUSCEPTIBILITY PROTEIN;	-	-	-	-	-	-	-	-	-	-	-	-	-	IPR001357;IPR018957;IPR001841;IPR025994;IPR017907;IPR013083;IPR011364	Y	BRCA1	9606 [Organism: human] [Scientific Name: Homo sapiens]	Y	3	1T15-A01	-	-	-	-	-	-	-	-	-
1T2U	A	P38398	-	-	-	-	-	-	-	-	-	-	-	-	8.2	2.9	88	207	16	MOLECULE: BREAST CANCER TYPE 1 SUSCEPTIBILITY PROTEIN;	-	-	-	-	-	-	-	-	-	-	-	-	-	IPR001357;IPR018957;IPR001841;IPR025994;IPR017907;IPR013083;IPR011364	Y	BRCA1	9606 [Organism: human] [Scientific Name: Homo sapiens]	Y	5	1T15-A02	-	-	-	-	-	-	-	-	-
1JNX	X	P38398	-	-	-	-	-	-	-	-	-	-	-	-	8.2	2.9	87	207	17	MOLECULE: BREAST CANCER TYPE 1 SUSCEPTIBILITY PROTEIN;	-	-	-	-	-	-	-	-	-	-	-	-	-	IPR001357;IPR018957;IPR001841;IPR025994;IPR017907;IPR013083;IPR011364	Y	BRCA1	9606 [Organism: human] [Scientific Name: Homo sapiens]	Y	5	1T15-A02	-	-	-	-	-	-	-	-	-
1JNX	X	P38398	-	-	-	-	-	-	-	-	-	-	-	-	8.2	2.9	87	207	17	MOLECULE: BREAST CANCER TYPE 1 SUSCEPTIBILITY PROTEIN;	-	-	-	-	-	-	-	-	-	-	-	-	-	IPR001357;IPR018957;IPR001841;IPR025994;IPR017907;IPR013083;IPR011364	Y	BRCA1	9606 [Organism: human] [Scientific Name: Homo sapiens]	Y	3	1T15-A01	-	-	-	-	-	-	-	-	-
1JNX	X	P38398	-	-	-	-	-	-	-	-	-	-	-	-	8.2	2.9	87	207	17	MOLECULE: BREAST CANCER TYPE 1 SUSCEPTIBILITY PROTEIN;	-	-	-	-	-	-	-	-	-	-	-	-	-	IPR001357;IPR018957;IPR001841;IPR025994;IPR017907;IPR013083;IPR011364	Y	BRCA1	9606 [Organism: human] [Scientific Name: Homo sapiens]	Y	5	1T15-A02	-	-	-	-	-	-	-	-	-
1JNX	X	P38398	-	-	-	-	-	-	-	-	-	-	-	-	8.2	2.9	87	207	17	MOLECULE: BREAST CANCER TYPE 1 SUSCEPTIBILITY PROTEIN;	-	-	-	-	-	-	-	-	-	-	-	-	-	IPR001357;IPR018957;IPR001841;IPR025994;IPR017907;IPR013083;IPR011364	Y	BRCA1	9606 [Organism: human] [Scientific Name: Homo sapiens]	Y	5	1T15-A02	-	-	-	-	-	-	-	-	-
1JNX	X	P38398	-	-	-	-	-	-	-	-	-	-	-	-	8.2	2.9	87	207	17	MOLECULE: BREAST CANCER TYPE 1 SUSCEPTIBILITY PROTEIN;	-	-	-	-	-	-	-	-	-	-	-	-	-	IPR001357;IPR018957;IPR001841;IPR025994;IPR017907;IPR013083;IPR011364	Y	BRCA1	9606 [Organism: human] [Scientific Name: Homo sapiens]	Y	3	1T15-A01	-	-	-	-	-	-	-	-	-
1JNX	X	P38398	-	-	-	-	-	-	-	-	-	-	-	-	8.2	2.9	87	207	17	MOLECULE: BREAST CANCER TYPE 1 SUSCEPTIBILITY PROTEIN;	-	-	-	-	-	-	-	-	-	-	-	-	-	IPR001357;IPR018957;IPR001841;IPR025994;IPR017907;IPR013083;IPR011364	Y	BRCA1	9606 [Organism: human] [Scientific Name: Homo sapiens]	Y	5	1T15-A02	-	-	-	-	-	-	-	-	-
1JNX	X	P38398	-	-	-	-	-	-	-	-	-	-	-	-	8.2	2.9	87	207	17	MOLECULE: BREAST CANCER TYPE 1 SUSCEPTIBILITY PROTEIN;	-	-	-	-	-	-	-	-	-	-	-	-	-	IPR001357;IPR018957;IPR001841;IPR025994;IPR017907;IPR013083;IPR011364	Y	BRCA1	9606 [Organism: human] [Scientific Name: Homo sapiens]	Y	5	1T15-A02	-	-	-	-	-	-	-	-	-
1JNX	X	P38398	-	-	-	-	-	-	-	-	-	-	-	-	8.2	2.9	87	207	17	MOLECULE: BREAST CANCER TYPE 1 SUSCEPTIBILITY PROTEIN;	-	-	-	-	-	-	-	-	-	-	-	-	-	IPR001357;IPR018957;IPR001841;IPR025994;IPR017907;IPR013083;IPR011364	Y	BRCA1	9606 [Organism: human] [Scientific Name: Homo sapiens]	Y	3	1T15-A01	-	-	-	-	-	-	-	-	-
1JNX	X	P38398	-	-	-	-	-	-	-	-	-	-	-	-	8.2	2.9	87	207	17	MOLECULE: BREAST CANCER TYPE 1 SUSCEPTIBILITY PROTEIN;	-	-	-	-	-	-	-	-	-	-	-	-	-	IPR001357;IPR018957;IPR001841;IPR025994;IPR017907;IPR013083;IPR011364	Y	BRCA1	9606 [Organism: human] [Scientific Name: Homo sapiens]	Y	5	1T15-A02	-	-	-	-	-	-	-	-	-
1JNX	X	P38398	-	-	-	-	-	-	-	-	-	-	-	-	8.2	2.9	87	207	17	MOLECULE: BREAST CANCER TYPE 1 SUSCEPTIBILITY PROTEIN;	-	-	-	-	-	-	-	-	-	-	-	-	-	IPR001357;IPR018957;IPR001841;IPR025994;IPR017907;IPR013083;IPR011364	Y	BRCA1	9606 [Organism: human] [Scientific Name: Homo sapiens]	Y	5	1T15-A02	-	-	-	-	-	-	-	-	-
1JNX	X	P38398	-	-	-	-	-	-	-	-	-	-	-	-	8.2	2.9	87	207	17	MOLECULE: BREAST CANCER TYPE 1 SUSCEPTIBILITY PROTEIN;	-	-	-	-	-	-	-	-	-	-	-	-	-	IPR001357;IPR018957;IPR001841;IPR025994;IPR017907;IPR013083;IPR011364	Y	BRCA1	9606 [Organism: human] [Scientific Name: Homo sapiens]	Y	3	1T15-A01	-	-	-	-	-	-	-	-	-
1JNX	X	P38398	-	-	-	-	-	-	-	-	-	-	-	-	8.2	2.9	87	207	17	MOLECULE: BREAST CANCER TYPE 1 SUSCEPTIBILITY PROTEIN;	-	-	-	-	-	-	-	-	-	-	-	-	-	IPR001357;IPR018957;IPR001841;IPR025994;IPR017907;IPR013083;IPR011364	Y	BRCA1	9606 [Organism: human] [Scientific Name: Homo sapiens]	Y	5	1T15-A02	-	-	-	-	-	-	-	-	-
1JNX	X	P38398	-	-	-	-	-	-	-	-	-	-	-	-	8.2	2.9	87	207	17	MOLECULE: BREAST CANCER TYPE 1 SUSCEPTIBILITY PROTEIN;	-	-	-	-	-	-	-	-	-	-	-	-	-	IPR001357;IPR018957;IPR001841;IPR025994;IPR017907;IPR013083;IPR011364	Y	BRCA1	9606 [Organism: human] [Scientific Name: Homo sapiens]	Y	5	1T15-A02	-	-	-	-	-	-	-	-	-
1JNX	X	P38398	-	-	-	-	-	-	-	-	-	-	-	-	8.2	2.9	87	207	17	MOLECULE: BREAST CANCER TYPE 1 SUSCEPTIBILITY PROTEIN;	-	-	-	-	-	-	-	-	-	-	-	-	-	IPR001357;IPR018957;IPR001841;IPR025994;IPR017907;IPR013083;IPR011364	Y	BRCA1	9606 [Organism: human] [Scientific Name: Homo sapiens]	Y	3	1T15-A01	-	-	-	-	-	-	-	-	-
1JNX	X	P38398	-	-	-	-	-	-	-	-	-	-	-	-	8.2	2.9	87	207	17	MOLECULE: BREAST CANCER TYPE 1 SUSCEPTIBILITY PROTEIN;	-	-	-	-	-	-	-	-	-	-	-	-	-	IPR001357;IPR018957;IPR001841;IPR025994;IPR017907;IPR013083;IPR011364	Y	BRCA1	9606 [Organism: human] [Scientific Name: Homo sapiens]	Y	5	1T15-A02	-	-	-	-	-	-	-	-	-
1T2V	A	P38398	-	-	-	-	-	-	-	-	-	-	-	-	8.1	3	89	208	15	MOLECULE: BREAST CANCER TYPE 1 SUSCEPTIBILITY PROTEIN;	-	-	-	-	-	-	-	-	-	-	-	-	-	IPR001357;IPR018957;IPR001841;IPR025994;IPR017907;IPR013083;IPR011364	Y	BRCA1	9606 [Organism: human] [Scientific Name: Homo sapiens]	Y	5	1T15-A02	-	-	-	-	-	-	-	-	-
1T2V	A	P38398	-	-	-	-	-	-	-	-	-	-	-	-	8.1	3	89	208	15	MOLECULE: BREAST CANCER TYPE 1 SUSCEPTIBILITY PROTEIN;	-	-	-	-	-	-	-	-	-	-	-	-	-	IPR001357;IPR018957;IPR001841;IPR025994;IPR017907;IPR013083;IPR011364	Y	BRCA1	9606 [Organism: human] [Scientific Name: Homo sapiens]	Y	3	1T15-A01	-	-	-	-	-	-	-	-	-
1T2V	A	P38398	-	-	-	-	-	-	-	-	-	-	-	-	8.1	3	89	208	15	MOLECULE: BREAST CANCER TYPE 1 SUSCEPTIBILITY PROTEIN;	-	-	-	-	-	-	-	-	-	-	-	-	-	IPR001357;IPR018957;IPR001841;IPR025994;IPR017907;IPR013083;IPR011364	Y	BRCA1	9606 [Organism: human] [Scientific Name: Homo sapiens]	Y	5	1T15-A02	-	-	-	-	-	-	-	-	-
1T2V	A	P38398	-	-	-	-	-	-	-	-	-	-	-	-	8.1	3	89	208	15	MOLECULE: BREAST CANCER TYPE 1 SUSCEPTIBILITY PROTEIN;	-	-	-	-	-	-	-	-	-	-	-	-	-	IPR001357;IPR018957;IPR001841;IPR025994;IPR017907;IPR013083;IPR011364	Y	BRCA1	9606 [Organism: human] [Scientific Name: Homo sapiens]	Y	5	1T15-A02	-	-	-	-	-	-	-	-	-
1T2V	A	P38398	-	-	-	-	-	-	-	-	-	-	-	-	8.1	3	89	208	15	MOLECULE: BREAST CANCER TYPE 1 SUSCEPTIBILITY PROTEIN;	-	-	-	-	-	-	-	-	-	-	-	-	-	IPR001357;IPR018957;IPR001841;IPR025994;IPR017907;IPR013083;IPR011364	Y	BRCA1	9606 [Organism: human] [Scientific Name: Homo sapiens]	Y	3	1T15-A01	-	-	-	-	-	-	-	-	-
1T2V	A	P38398	-	-	-	-	-	-	-	-	-	-	-	-	8.1	3	89	208	15	MOLECULE: BREAST CANCER TYPE 1 SUSCEPTIBILITY PROTEIN;	-	-	-	-	-	-	-	-	-	-	-	-	-	IPR001357;IPR018957;IPR001841;IPR025994;IPR017907;IPR013083;IPR011364	Y	BRCA1	9606 [Organism: human] [Scientific Name: Homo sapiens]	Y	5	1T15-A02	-	-	-	-	-	-	-	-	-
1T2V	A	P38398	-	-	-	-	-	-	-	-	-	-	-	-	8.1	3	89	208	15	MOLECULE: BREAST CANCER TYPE 1 SUSCEPTIBILITY PROTEIN;	-	-	-	-	-	-	-	-	-	-	-	-	-	IPR001357;IPR018957;IPR001841;IPR025994;IPR017907;IPR013083;IPR011364	Y	BRCA1	9606 [Organism: human] [Scientific Name: Homo sapiens]	Y	5	1T15-A02	-	-	-	-	-	-	-	-	-
1T2V	A	P38398	-	-	-	-	-	-	-	-	-	-	-	-	8.1	3	89	208	15	MOLECULE: BREAST CANCER TYPE 1 SUSCEPTIBILITY PROTEIN;	-	-	-	-	-	-	-	-	-	-	-	-	-	IPR001357;IPR018957;IPR001841;IPR025994;IPR017907;IPR013083;IPR011364	Y	BRCA1	9606 [Organism: human] [Scientific Name: Homo sapiens]	Y	3	1T15-A01	-	-	-	-	-	-	-	-	-
1T2V	A	P38398	-	-	-	-	-	-	-	-	-	-	-	-	8.1	3	89	208	15	MOLECULE: BREAST CANCER TYPE 1 SUSCEPTIBILITY PROTEIN;	-	-	-	-	-	-	-	-	-	-	-	-	-	IPR001357;IPR018957;IPR001841;IPR025994;IPR017907;IPR013083;IPR011364	Y	BRCA1	9606 [Organism: human] [Scientific Name: Homo sapiens]	Y	5	1T15-A02	-	-	-	-	-	-	-	-	-
1T2V	A	P38398	-	-	-	-	-	-	-	-	-	-	-	-	8.1	3	89	208	15	MOLECULE: BREAST CANCER TYPE 1 SUSCEPTIBILITY PROTEIN;	-	-	-	-	-	-	-	-	-	-	-	-	-	IPR001357;IPR018957;IPR001841;IPR025994;IPR017907;IPR013083;IPR011364	Y	BRCA1	9606 [Organism: human] [Scientific Name: Homo sapiens]	Y	5	1T15-A02	-	-	-	-	-	-	-	-	-
1T2V	A	P38398	-	-	-	-	-	-	-	-	-	-	-	-	8.1	3	89	208	15	MOLECULE: BREAST CANCER TYPE 1 SUSCEPTIBILITY PROTEIN;	-	-	-	-	-	-	-	-	-	-	-	-	-	IPR001357;IPR018957;IPR001841;IPR025994;IPR017907;IPR013083;IPR011364	Y	BRCA1	9606 [Organism: human] [Scientific Name: Homo sapiens]	Y	3	1T15-A01	-	-	-	-	-	-	-	-	-
1T2V	A	P38398	-	-	-	-	-	-	-	-	-	-	-	-	8.1	3	89	208	15	MOLECULE: BREAST CANCER TYPE 1 SUSCEPTIBILITY PROTEIN;	-	-	-	-	-	-	-	-	-	-	-	-	-	IPR001357;IPR018957;IPR001841;IPR025994;IPR017907;IPR013083;IPR011364	Y	BRCA1	9606 [Organism: human] [Scientific Name: Homo sapiens]	Y	5	1T15-A02	-	-	-	-	-	-	-	-	-
1T2V	A	P38398	-	-	-	-	-	-	-	-	-	-	-	-	8.1	3	89	208	15	MOLECULE: BREAST CANCER TYPE 1 SUSCEPTIBILITY PROTEIN;	-	-	-	-	-	-	-	-	-	-	-	-	-	IPR001357;IPR018957;IPR001841;IPR025994;IPR017907;IPR013083;IPR011364	Y	BRCA1	9606 [Organism: human] [Scientific Name: Homo sapiens]	Y	5	1T15-A02	-	-	-	-	-	-	-	-	-
1T2V	A	P38398	-	-	-	-	-	-	-	-	-	-	-	-	8.1	3	89	208	15	MOLECULE: BREAST CANCER TYPE 1 SUSCEPTIBILITY PROTEIN;	-	-	-	-	-	-	-	-	-	-	-	-	-	IPR001357;IPR018957;IPR001841;IPR025994;IPR017907;IPR013083;IPR011364	Y	BRCA1	9606 [Organism: human] [Scientific Name: Homo sapiens]	Y	3	1T15-A01	-	-	-	-	-	-	-	-	-
1T2V	A	P38398	-	-	-	-	-	-	-	-	-	-	-	-	8.1	3	89	208	15	MOLECULE: BREAST CANCER TYPE 1 SUSCEPTIBILITY PROTEIN;	-	-	-	-	-	-	-	-	-	-	-	-	-	IPR001357;IPR018957;IPR001841;IPR025994;IPR017907;IPR013083;IPR011364	Y	BRCA1	9606 [Organism: human] [Scientific Name: Homo sapiens]	Y	5	1T15-A02	-	-	-	-	-	-	-	-	-
1T15	A	P38398	-	-	-	-	-	-	-	-	-	-	-	-	8.1	3	89	211	15	MOLECULE: BREAST CANCER TYPE 1 SUSCEPTIBILITY PROTEIN;	-	-	-	-	-	-	-	-	-	-	-	-	-	IPR001357;IPR018957;IPR001841;IPR025994;IPR017907;IPR013083;IPR011364	Y	BRCA1	9606 [Organism: human] [Scientific Name: Homo sapiens]	Y	5	1T15-A02	16	50.83	56.09	0.4688	0.5174	0.6758	2.37	87	92
1T15	A	P38398	-	-	-	-	-	-	-	-	-	-	-	-	8.1	3	89	211	15	MOLECULE: BREAST CANCER TYPE 1 SUSCEPTIBILITY PROTEIN;	-	-	-	-	-	-	-	-	-	-	-	-	-	IPR001357;IPR018957;IPR001841;IPR025994;IPR017907;IPR013083;IPR011364	Y	BRCA1	9606 [Organism: human] [Scientific Name: Homo sapiens]	Y	3	1T15-A01	16	50.83	56.09	0.4688	0.5174	0.6758	2.37	87	92
1T15	A	P38398	-	-	-	-	-	-	-	-	-	-	-	-	8.1	3	89	211	15	MOLECULE: BREAST CANCER TYPE 1 SUSCEPTIBILITY PROTEIN;	-	-	-	-	-	-	-	-	-	-	-	-	-	IPR001357;IPR018957;IPR001841;IPR025994;IPR017907;IPR013083;IPR011364	Y	BRCA1	9606 [Organism: human] [Scientific Name: Homo sapiens]	Y	5	1T15-A02	16	50.83	56.09	0.4688	0.5174	0.6758	2.37	87	92
1T15	A	P38398	-	-	-	-	-	-	-	-	-	-	-	-	8.1	3	89	211	15	MOLECULE: BREAST CANCER TYPE 1 SUSCEPTIBILITY PROTEIN;	-	-	-	-	-	-	-	-	-	-	-	-	-	IPR001357;IPR018957;IPR001841;IPR025994;IPR017907;IPR013083;IPR011364	Y	BRCA1	9606 [Organism: human] [Scientific Name: Homo sapiens]	Y	5	1T15-A02	16	50.83	56.09	0.4688	0.5174	0.6758	2.37	87	92
1T15	A	P38398	-	-	-	-	-	-	-	-	-	-	-	-	8.1	3	89	211	15	MOLECULE: BREAST CANCER TYPE 1 SUSCEPTIBILITY PROTEIN;	-	-	-	-	-	-	-	-	-	-	-	-	-	IPR001357;IPR018957;IPR001841;IPR025994;IPR017907;IPR013083;IPR011364	Y	BRCA1	9606 [Organism: human] [Scientific Name: Homo sapiens]	Y	3	1T15-A01	16	50.83	56.09	0.4688	0.5174	0.6758	2.37	87	92
1T15	A	P38398	-	-	-	-	-	-	-	-	-	-	-	-	8.1	3	89	211	15	MOLECULE: BREAST CANCER TYPE 1 SUSCEPTIBILITY PROTEIN;	-	-	-	-	-	-	-	-	-	-	-	-	-	IPR001357;IPR018957;IPR001841;IPR025994;IPR017907;IPR013083;IPR011364	Y	BRCA1	9606 [Organism: human] [Scientific Name: Homo sapiens]	Y	5	1T15-A02	16	50.83	56.09	0.4688	0.5174	0.6758	2.37	87	92
1T15	A	P38398	-	-	-	-	-	-	-	-	-	-	-	-	8.1	3	89	211	15	MOLECULE: BREAST CANCER TYPE 1 SUSCEPTIBILITY PROTEIN;	-	-	-	-	-	-	-	-	-	-	-	-	-	IPR001357;IPR018957;IPR001841;IPR025994;IPR017907;IPR013083;IPR011364	Y	BRCA1	9606 [Organism: human] [Scientific Name: Homo sapiens]	Y	5	1T15-A02	16	50.83	56.09	0.4688	0.5174	0.6758	2.37	87	92
1T15	A	P38398	-	-	-	-	-	-	-	-	-	-	-	-	8.1	3	89	211	15	MOLECULE: BREAST CANCER TYPE 1 SUSCEPTIBILITY PROTEIN;	-	-	-	-	-	-	-	-	-	-	-	-	-	IPR001357;IPR018957;IPR001841;IPR025994;IPR017907;IPR013083;IPR011364	Y	BRCA1	9606 [Organism: human] [Scientific Name: Homo sapiens]	Y	3	1T15-A01	16	50.83	56.09	0.4688	0.5174	0.6758	2.37	87	92
1T15	A	P38398	-	-	-	-	-	-	-	-	-	-	-	-	8.1	3	89	211	15	MOLECULE: BREAST CANCER TYPE 1 SUSCEPTIBILITY PROTEIN;	-	-	-	-	-	-	-	-	-	-	-	-	-	IPR001357;IPR018957;IPR001841;IPR025994;IPR017907;IPR013083;IPR011364	Y	BRCA1	9606 [Organism: human] [Scientific Name: Homo sapiens]	Y	5	1T15-A02	16	50.83	56.09	0.4688	0.5174	0.6758	2.37	87	92
1T15	A	P38398	-	-	-	-	-	-	-	-	-	-	-	-	8.1	3	89	211	15	MOLECULE: BREAST CANCER TYPE 1 SUSCEPTIBILITY PROTEIN;	-	-	-	-	-	-	-	-	-	-	-	-	-	IPR001357;IPR018957;IPR001841;IPR025994;IPR017907;IPR013083;IPR011364	Y	BRCA1	9606 [Organism: human] [Scientific Name: Homo sapiens]	Y	5	1T15-A02	16	50.83	56.09	0.4688	0.5174	0.6758	2.37	87	92
1T15	A	P38398	-	-	-	-	-	-	-	-	-	-	-	-	8.1	3	89	211	15	MOLECULE: BREAST CANCER TYPE 1 SUSCEPTIBILITY PROTEIN;	-	-	-	-	-	-	-	-	-	-	-	-	-	IPR001357;IPR018957;IPR001841;IPR025994;IPR017907;IPR013083;IPR011364	Y	BRCA1	9606 [Organism: human] [Scientific Name: Homo sapiens]	Y	3	1T15-A01	16	50.83	56.09	0.4688	0.5174	0.6758	2.37	87	92
1T15	A	P38398	-	-	-	-	-	-	-	-	-	-	-	-	8.1	3	89	211	15	MOLECULE: BREAST CANCER TYPE 1 SUSCEPTIBILITY PROTEIN;	-	-	-	-	-	-	-	-	-	-	-	-	-	IPR001357;IPR018957;IPR001841;IPR025994;IPR017907;IPR013083;IPR011364	Y	BRCA1	9606 [Organism: human] [Scientific Name: Homo sapiens]	Y	5	1T15-A02	16	50.83	56.09	0.4688	0.5174	0.6758	2.37	87	92
1T15	A	P38398	-	-	-	-	-	-	-	-	-	-	-	-	8.1	3	89	211	15	MOLECULE: BREAST CANCER TYPE 1 SUSCEPTIBILITY PROTEIN;	-	-	-	-	-	-	-	-	-	-	-	-	-	IPR001357;IPR018957;IPR001841;IPR025994;IPR017907;IPR013083;IPR011364	Y	BRCA1	9606 [Organism: human] [Scientific Name: Homo sapiens]	Y	5	1T15-A02	16	50.83	56.09	0.4688	0.5174	0.6758	2.37	87	92
1T15	A	P38398	-	-	-	-	-	-	-	-	-	-	-	-	8.1	3	89	211	15	MOLECULE: BREAST CANCER TYPE 1 SUSCEPTIBILITY PROTEIN;	-	-	-	-	-	-	-	-	-	-	-	-	-	IPR001357;IPR018957;IPR001841;IPR025994;IPR017907;IPR013083;IPR011364	Y	BRCA1	9606 [Organism: human] [Scientific Name: Homo sapiens]	Y	3	1T15-A01	16	50.83	56.09	0.4688	0.5174	0.6758	2.37	87	92
1T15	A	P38398	-	-	-	-	-	-	-	-	-	-	-	-	8.1	3	89	211	15	MOLECULE: BREAST CANCER TYPE 1 SUSCEPTIBILITY PROTEIN;	-	-	-	-	-	-	-	-	-	-	-	-	-	IPR001357;IPR018957;IPR001841;IPR025994;IPR017907;IPR013083;IPR011364	Y	BRCA1	9606 [Organism: human] [Scientific Name: Homo sapiens]	Y	5	1T15-A02	16	50.83	56.09	0.4688	0.5174	0.6758	2.37	87	92
1T15	A	P38398	-	-	-	-	-	-	-	-	-	-	-	-	8.1	3	89	211	15	MOLECULE: BREAST CANCER TYPE 1 SUSCEPTIBILITY PROTEIN;	-	-	-	-	-	-	-	-	-	-	-	-	-	IPR001357;IPR018957;IPR001841;IPR025994;IPR017907;IPR013083;IPR011364	Y	BRCA1	9606 [Organism: human] [Scientific Name: Homo sapiens]	Y	5	1T15-A02	16	50.83	56.09	0.4688	0.5174	0.6758	2.37	87	92
1T15	A	P38398	-	-	-	-	-	-	-	-	-	-	-	-	8.1	3	89	211	15	MOLECULE: BREAST CANCER TYPE 1 SUSCEPTIBILITY PROTEIN;	-	-	-	-	-	-	-	-	-	-	-	-	-	IPR001357;IPR018957;IPR001841;IPR025994;IPR017907;IPR013083;IPR011364	Y	BRCA1	9606 [Organism: human] [Scientific Name: Homo sapiens]	Y	3	1T15-A01	16	50.83	56.09	0.4688	0.5174	0.6758	2.37	87	92
1T15	A	P38398	-	-	-	-	-	-	-	-	-	-	-	-	8.1	3	89	211	15	MOLECULE: BREAST CANCER TYPE 1 SUSCEPTIBILITY PROTEIN;	-	-	-	-	-	-	-	-	-	-	-	-	-	IPR001357;IPR018957;IPR001841;IPR025994;IPR017907;IPR013083;IPR011364	Y	BRCA1	9606 [Organism: human] [Scientific Name: Homo sapiens]	Y	5	1T15-A02	16	50.83	56.09	0.4688	0.5174	0.6758	2.37	87	92
1T15	A	P38398	-	-	-	-	-	-	-	-	-	-	-	-	8.1	3	89	211	15	MOLECULE: BREAST CANCER TYPE 1 SUSCEPTIBILITY PROTEIN;	-	-	-	-	-	-	-	-	-	-	-	-	-	IPR001357;IPR018957;IPR001841;IPR025994;IPR017907;IPR013083;IPR011364	Y	BRCA1	9606 [Organism: human] [Scientific Name: Homo sapiens]	Y	5	1T15-A02	16	50.83	56.09	0.4688	0.5174	0.6758	2.37	87	92
1T15	A	P38398	-	-	-	-	-	-	-	-	-	-	-	-	8.1	3	89	211	15	MOLECULE: BREAST CANCER TYPE 1 SUSCEPTIBILITY PROTEIN;	-	-	-	-	-	-	-	-	-	-	-	-	-	IPR001357;IPR018957;IPR001841;IPR025994;IPR017907;IPR013083;IPR011364	Y	BRCA1	9606 [Organism: human] [Scientific Name: Homo sapiens]	Y	3	1T15-A01	16	50.83	56.09	0.4688	0.5174	0.6758	2.37	87	92
1T15	A	P38398	-	-	-	-	-	-	-	-	-	-	-	-	8.1	3	89	211	15	MOLECULE: BREAST CANCER TYPE 1 SUSCEPTIBILITY PROTEIN;	-	-	-	-	-	-	-	-	-	-	-	-	-	IPR001357;IPR018957;IPR001841;IPR025994;IPR017907;IPR013083;IPR011364	Y	BRCA1	9606 [Organism: human] [Scientific Name: Homo sapiens]	Y	5	1T15-A02	16	50.83	56.09	0.4688	0.5174	0.6758	2.37	87	92
1T15	A	P38398	-	-	-	-	-	-	-	-	-	-	-	-	8.1	3	89	211	15	MOLECULE: BREAST CANCER TYPE 1 SUSCEPTIBILITY PROTEIN;	-	-	-	-	-	-	-	-	-	-	-	-	-	IPR001357;IPR018957;IPR001841;IPR025994;IPR017907;IPR013083;IPR011364	Y	BRCA1	9606 [Organism: human] [Scientific Name: Homo sapiens]	Y	5	1T15-A02	16	50.83	56.09	0.4688	0.5174	0.6758	2.37	87	92
1T15	A	P38398	-	-	-	-	-	-	-	-	-	-	-	-	8.1	3	89	211	15	MOLECULE: BREAST CANCER TYPE 1 SUSCEPTIBILITY PROTEIN;	-	-	-	-	-	-	-	-	-	-	-	-	-	IPR001357;IPR018957;IPR001841;IPR025994;IPR017907;IPR013083;IPR011364	Y	BRCA1	9606 [Organism: human] [Scientific Name: Homo sapiens]	Y	3	1T15-A01	16	50.83	56.09	0.4688	0.5174	0.6758	2.37	87	92
1T15	A	P38398	-	-	-	-	-	-	-	-	-	-	-	-	8.1	3	89	211	15	MOLECULE: BREAST CANCER TYPE 1 SUSCEPTIBILITY PROTEIN;	-	-	-	-	-	-	-	-	-	-	-	-	-	IPR001357;IPR018957;IPR001841;IPR025994;IPR017907;IPR013083;IPR011364	Y	BRCA1	9606 [Organism: human] [Scientific Name: Homo sapiens]	Y	5	1T15-A02	16	50.83	56.09	0.4688	0.5174	0.6758	2.37	87	92
1T15	A	P38398	-	-	-	-	-	-	-	-	-	-	-	-	8.1	3	89	211	15	MOLECULE: BREAST CANCER TYPE 1 SUSCEPTIBILITY PROTEIN;	-	-	-	-	-	-	-	-	-	-	-	-	-	IPR001357;IPR018957;IPR001841;IPR025994;IPR017907;IPR013083;IPR011364	Y	BRCA1	9606 [Organism: human] [Scientific Name: Homo sapiens]	Y	5	1T15-A02	16	50.83	56.09	0.4688	0.5174	0.6758	2.37	87	92
1T15	A	P38398	-	-	-	-	-	-	-	-	-	-	-	-	8.1	3	89	211	15	MOLECULE: BREAST CANCER TYPE 1 SUSCEPTIBILITY PROTEIN;	-	-	-	-	-	-	-	-	-	-	-	-	-	IPR001357;IPR018957;IPR001841;IPR025994;IPR017907;IPR013083;IPR011364	Y	BRCA1	9606 [Organism: human] [Scientific Name: Homo sapiens]	Y	3	1T15-A01	16	50.83	56.09	0.4688	0.5174	0.6758	2.37	87	92
1T15	A	P38398	-	-	-	-	-	-	-	-	-	-	-	-	8.1	3	89	211	15	MOLECULE: BREAST CANCER TYPE 1 SUSCEPTIBILITY PROTEIN;	-	-	-	-	-	-	-	-	-	-	-	-	-	IPR001357;IPR018957;IPR001841;IPR025994;IPR017907;IPR013083;IPR011364	Y	BRCA1	9606 [Organism: human] [Scientific Name: Homo sapiens]	Y	5	1T15-A02	16	50.83	56.09	0.4688	0.5174	0.6758	2.37	87	92
1T15	A	P38398	-	-	-	-	-	-	-	-	-	-	-	-	8.1	3	89	211	15	MOLECULE: BREAST CANCER TYPE 1 SUSCEPTIBILITY PROTEIN;	-	-	-	-	-	-	-	-	-	-	-	-	-	IPR001357;IPR018957;IPR001841;IPR025994;IPR017907;IPR013083;IPR011364	Y	BRCA1	9606 [Organism: human] [Scientific Name: Homo sapiens]	Y	5	1T15-A02	16	50.83	56.09	0.4688	0.5174	0.6758	2.37	87	92
1T15	A	P38398	-	-	-	-	-	-	-	-	-	-	-	-	8.1	3	89	211	15	MOLECULE: BREAST CANCER TYPE 1 SUSCEPTIBILITY PROTEIN;	-	-	-	-	-	-	-	-	-	-	-	-	-	IPR001357;IPR018957;IPR001841;IPR025994;IPR017907;IPR013083;IPR011364	Y	BRCA1	9606 [Organism: human] [Scientific Name: Homo sapiens]	Y	3	1T15-A01	16	50.83	56.09	0.4688	0.5174	0.6758	2.37	87	92
1T15	A	P38398	-	-	-	-	-	-	-	-	-	-	-	-	8.1	3	89	211	15	MOLECULE: BREAST CANCER TYPE 1 SUSCEPTIBILITY PROTEIN;	-	-	-	-	-	-	-	-	-	-	-	-	-	IPR001357;IPR018957;IPR001841;IPR025994;IPR017907;IPR013083;IPR011364	Y	BRCA1	9606 [Organism: human] [Scientific Name: Homo sapiens]	Y	5	1T15-A02	16	50.83	56.09	0.4688	0.5174	0.6758	2.37	87	92
1T15	A	P38398	-	-	-	-	-	-	-	-	-	-	-	-	8.1	3	89	211	15	MOLECULE: BREAST CANCER TYPE 1 SUSCEPTIBILITY PROTEIN;	-	-	-	-	-	-	-	-	-	-	-	-	-	IPR001357;IPR018957;IPR001841;IPR025994;IPR017907;IPR013083;IPR011364	Y	BRCA1	9606 [Organism: human] [Scientific Name: Homo sapiens]	Y	5	1T15-A02	24	47.91	51.26	0.4357	0.4662	0.6245	2.58	85	86
1T15	A	P38398	-	-	-	-	-	-	-	-	-	-	-	-	8.1	3	89	211	15	MOLECULE: BREAST CANCER TYPE 1 SUSCEPTIBILITY PROTEIN;	-	-	-	-	-	-	-	-	-	-	-	-	-	IPR001357;IPR018957;IPR001841;IPR025994;IPR017907;IPR013083;IPR011364	Y	BRCA1	9606 [Organism: human] [Scientific Name: Homo sapiens]	Y	3	1T15-A01	24	47.91	51.26	0.4357	0.4662	0.6245	2.58	85	86
1T15	A	P38398	-	-	-	-	-	-	-	-	-	-	-	-	8.1	3	89	211	15	MOLECULE: BREAST CANCER TYPE 1 SUSCEPTIBILITY PROTEIN;	-	-	-	-	-	-	-	-	-	-	-	-	-	IPR001357;IPR018957;IPR001841;IPR025994;IPR017907;IPR013083;IPR011364	Y	BRCA1	9606 [Organism: human] [Scientific Name: Homo sapiens]	Y	5	1T15-A02	24	47.91	51.26	0.4357	0.4662	0.6245	2.58	85	86
1T15	A	P38398	-	-	-	-	-	-	-	-	-	-	-	-	8.1	3	89	211	15	MOLECULE: BREAST CANCER TYPE 1 SUSCEPTIBILITY PROTEIN;	-	-	-	-	-	-	-	-	-	-	-	-	-	IPR001357;IPR018957;IPR001841;IPR025994;IPR017907;IPR013083;IPR011364	Y	BRCA1	9606 [Organism: human] [Scientific Name: Homo sapiens]	Y	5	1T15-A02	24	47.91	51.26	0.4357	0.4662	0.6245	2.58	85	86
1T15	A	P38398	-	-	-	-	-	-	-	-	-	-	-	-	8.1	3	89	211	15	MOLECULE: BREAST CANCER TYPE 1 SUSCEPTIBILITY PROTEIN;	-	-	-	-	-	-	-	-	-	-	-	-	-	IPR001357;IPR018957;IPR001841;IPR025994;IPR017907;IPR013083;IPR011364	Y	BRCA1	9606 [Organism: human] [Scientific Name: Homo sapiens]	Y	3	1T15-A01	24	47.91	51.26	0.4357	0.4662	0.6245	2.58	85	86
1T15	A	P38398	-	-	-	-	-	-	-	-	-	-	-	-	8.1	3	89	211	15	MOLECULE: BREAST CANCER TYPE 1 SUSCEPTIBILITY PROTEIN;	-	-	-	-	-	-	-	-	-	-	-	-	-	IPR001357;IPR018957;IPR001841;IPR025994;IPR017907;IPR013083;IPR011364	Y	BRCA1	9606 [Organism: human] [Scientific Name: Homo sapiens]	Y	5	1T15-A02	24	47.91	51.26	0.4357	0.4662	0.6245	2.58	85	86
1T15	A	P38398	-	-	-	-	-	-	-	-	-	-	-	-	8.1	3	89	211	15	MOLECULE: BREAST CANCER TYPE 1 SUSCEPTIBILITY PROTEIN;	-	-	-	-	-	-	-	-	-	-	-	-	-	IPR001357;IPR018957;IPR001841;IPR025994;IPR017907;IPR013083;IPR011364	Y	BRCA1	9606 [Organism: human] [Scientific Name: Homo sapiens]	Y	5	1T15-A02	24	47.91	51.26	0.4357	0.4662	0.6245	2.58	85	86
1T15	A	P38398	-	-	-	-	-	-	-	-	-	-	-	-	8.1	3	89	211	15	MOLECULE: BREAST CANCER TYPE 1 SUSCEPTIBILITY PROTEIN;	-	-	-	-	-	-	-	-	-	-	-	-	-	IPR001357;IPR018957;IPR001841;IPR025994;IPR017907;IPR013083;IPR011364	Y	BRCA1	9606 [Organism: human] [Scientific Name: Homo sapiens]	Y	3	1T15-A01	24	47.91	51.26	0.4357	0.4662	0.6245	2.58	85	86
1T15	A	P38398	-	-	-	-	-	-	-	-	-	-	-	-	8.1	3	89	211	15	MOLECULE: BREAST CANCER TYPE 1 SUSCEPTIBILITY PROTEIN;	-	-	-	-	-	-	-	-	-	-	-	-	-	IPR001357;IPR018957;IPR001841;IPR025994;IPR017907;IPR013083;IPR011364	Y	BRCA1	9606 [Organism: human] [Scientific Name: Homo sapiens]	Y	5	1T15-A02	24	47.91	51.26	0.4357	0.4662	0.6245	2.58	85	86
1T15	A	P38398	-	-	-	-	-	-	-	-	-	-	-	-	8.1	3	89	211	15	MOLECULE: BREAST CANCER TYPE 1 SUSCEPTIBILITY PROTEIN;	-	-	-	-	-	-	-	-	-	-	-	-	-	IPR001357;IPR018957;IPR001841;IPR025994;IPR017907;IPR013083;IPR011364	Y	BRCA1	9606 [Organism: human] [Scientific Name: Homo sapiens]	Y	5	1T15-A02	24	47.91	51.26	0.4357	0.4662	0.6245	2.58	85	86
1T15	A	P38398	-	-	-	-	-	-	-	-	-	-	-	-	8.1	3	89	211	15	MOLECULE: BREAST CANCER TYPE 1 SUSCEPTIBILITY PROTEIN;	-	-	-	-	-	-	-	-	-	-	-	-	-	IPR001357;IPR018957;IPR001841;IPR025994;IPR017907;IPR013083;IPR011364	Y	BRCA1	9606 [Organism: human] [Scientific Name: Homo sapiens]	Y	3	1T15-A01	24	47.91	51.26	0.4357	0.4662	0.6245	2.58	85	86
1T15	A	P38398	-	-	-	-	-	-	-	-	-	-	-	-	8.1	3	89	211	15	MOLECULE: BREAST CANCER TYPE 1 SUSCEPTIBILITY PROTEIN;	-	-	-	-	-	-	-	-	-	-	-	-	-	IPR001357;IPR018957;IPR001841;IPR025994;IPR017907;IPR013083;IPR011364	Y	BRCA1	9606 [Organism: human] [Scientific Name: Homo sapiens]	Y	5	1T15-A02	24	47.91	51.26	0.4357	0.4662	0.6245	2.58	85	86
1T15	A	P38398	-	-	-	-	-	-	-	-	-	-	-	-	8.1	3	89	211	15	MOLECULE: BREAST CANCER TYPE 1 SUSCEPTIBILITY PROTEIN;	-	-	-	-	-	-	-	-	-	-	-	-	-	IPR001357;IPR018957;IPR001841;IPR025994;IPR017907;IPR013083;IPR011364	Y	BRCA1	9606 [Organism: human] [Scientific Name: Homo sapiens]	Y	5	1T15-A02	24	47.91	51.26	0.4357	0.4662	0.6245	2.58	85	86
1T15	A	P38398	-	-	-	-	-	-	-	-	-	-	-	-	8.1	3	89	211	15	MOLECULE: BREAST CANCER TYPE 1 SUSCEPTIBILITY PROTEIN;	-	-	-	-	-	-	-	-	-	-	-	-	-	IPR001357;IPR018957;IPR001841;IPR025994;IPR017907;IPR013083;IPR011364	Y	BRCA1	9606 [Organism: human] [Scientific Name: Homo sapiens]	Y	3	1T15-A01	24	47.91	51.26	0.4357	0.4662	0.6245	2.58	85	86
1T15	A	P38398	-	-	-	-	-	-	-	-	-	-	-	-	8.1	3	89	211	15	MOLECULE: BREAST CANCER TYPE 1 SUSCEPTIBILITY PROTEIN;	-	-	-	-	-	-	-	-	-	-	-	-	-	IPR001357;IPR018957;IPR001841;IPR025994;IPR017907;IPR013083;IPR011364	Y	BRCA1	9606 [Organism: human] [Scientific Name: Homo sapiens]	Y	5	1T15-A02	24	47.91	51.26	0.4357	0.4662	0.6245	2.58	85	86
1T15	A	P38398	-	-	-	-	-	-	-	-	-	-	-	-	8.1	3	89	211	15	MOLECULE: BREAST CANCER TYPE 1 SUSCEPTIBILITY PROTEIN;	-	-	-	-	-	-	-	-	-	-	-	-	-	IPR001357;IPR018957;IPR001841;IPR025994;IPR017907;IPR013083;IPR011364	Y	BRCA1	9606 [Organism: human] [Scientific Name: Homo sapiens]	Y	5	1T15-A02	24	47.91	51.26	0.4357	0.4662	0.6245	2.58	85	86
1T15	A	P38398	-	-	-	-	-	-	-	-	-	-	-	-	8.1	3	89	211	15	MOLECULE: BREAST CANCER TYPE 1 SUSCEPTIBILITY PROTEIN;	-	-	-	-	-	-	-	-	-	-	-	-	-	IPR001357;IPR018957;IPR001841;IPR025994;IPR017907;IPR013083;IPR011364	Y	BRCA1	9606 [Organism: human] [Scientific Name: Homo sapiens]	Y	3	1T15-A01	24	47.91	51.26	0.4357	0.4662	0.6245	2.58	85	86
1T15	A	P38398	-	-	-	-	-	-	-	-	-	-	-	-	8.1	3	89	211	15	MOLECULE: BREAST CANCER TYPE 1 SUSCEPTIBILITY PROTEIN;	-	-	-	-	-	-	-	-	-	-	-	-	-	IPR001357;IPR018957;IPR001841;IPR025994;IPR017907;IPR013083;IPR011364	Y	BRCA1	9606 [Organism: human] [Scientific Name: Homo sapiens]	Y	5	1T15-A02	24	47.91	51.26	0.4357	0.4662	0.6245	2.58	85	86
1T15	A	P38398	-	-	-	-	-	-	-	-	-	-	-	-	8.1	3	89	211	15	MOLECULE: BREAST CANCER TYPE 1 SUSCEPTIBILITY PROTEIN;	-	-	-	-	-	-	-	-	-	-	-	-	-	IPR001357;IPR018957;IPR001841;IPR025994;IPR017907;IPR013083;IPR011364	Y	BRCA1	9606 [Organism: human] [Scientific Name: Homo sapiens]	Y	5	1T15-A02	24	47.91	51.26	0.4357	0.4662	0.6245	2.58	85	86
1T15	A	P38398	-	-	-	-	-	-	-	-	-	-	-	-	8.1	3	89	211	15	MOLECULE: BREAST CANCER TYPE 1 SUSCEPTIBILITY PROTEIN;	-	-	-	-	-	-	-	-	-	-	-	-	-	IPR001357;IPR018957;IPR001841;IPR025994;IPR017907;IPR013083;IPR011364	Y	BRCA1	9606 [Organism: human] [Scientific Name: Homo sapiens]	Y	3	1T15-A01	24	47.91	51.26	0.4357	0.4662	0.6245	2.58	85	86
1T15	A	P38398	-	-	-	-	-	-	-	-	-	-	-	-	8.1	3	89	211	15	MOLECULE: BREAST CANCER TYPE 1 SUSCEPTIBILITY PROTEIN;	-	-	-	-	-	-	-	-	-	-	-	-	-	IPR001357;IPR018957;IPR001841;IPR025994;IPR017907;IPR013083;IPR011364	Y	BRCA1	9606 [Organism: human] [Scientific Name: Homo sapiens]	Y	5	1T15-A02	24	47.91	51.26	0.4357	0.4662	0.6245	2.58	85	86
1T15	A	P38398	-	-	-	-	-	-	-	-	-	-	-	-	8.1	3	89	211	15	MOLECULE: BREAST CANCER TYPE 1 SUSCEPTIBILITY PROTEIN;	-	-	-	-	-	-	-	-	-	-	-	-	-	IPR001357;IPR018957;IPR001841;IPR025994;IPR017907;IPR013083;IPR011364	Y	BRCA1	9606 [Organism: human] [Scientific Name: Homo sapiens]	Y	5	1T15-A02	24	47.91	51.26	0.4357	0.4662	0.6245	2.58	85	86
1T15	A	P38398	-	-	-	-	-	-	-	-	-	-	-	-	8.1	3	89	211	15	MOLECULE: BREAST CANCER TYPE 1 SUSCEPTIBILITY PROTEIN;	-	-	-	-	-	-	-	-	-	-	-	-	-	IPR001357;IPR018957;IPR001841;IPR025994;IPR017907;IPR013083;IPR011364	Y	BRCA1	9606 [Organism: human] [Scientific Name: Homo sapiens]	Y	3	1T15-A01	24	47.91	51.26	0.4357	0.4662	0.6245	2.58	85	86
1T15	A	P38398	-	-	-	-	-	-	-	-	-	-	-	-	8.1	3	89	211	15	MOLECULE: BREAST CANCER TYPE 1 SUSCEPTIBILITY PROTEIN;	-	-	-	-	-	-	-	-	-	-	-	-	-	IPR001357;IPR018957;IPR001841;IPR025994;IPR017907;IPR013083;IPR011364	Y	BRCA1	9606 [Organism: human] [Scientific Name: Homo sapiens]	Y	5	1T15-A02	24	47.91	51.26	0.4357	0.4662	0.6245	2.58	85	86
1T15	A	P38398	-	-	-	-	-	-	-	-	-	-	-	-	8.1	3	89	211	15	MOLECULE: BREAST CANCER TYPE 1 SUSCEPTIBILITY PROTEIN;	-	-	-	-	-	-	-	-	-	-	-	-	-	IPR001357;IPR018957;IPR001841;IPR025994;IPR017907;IPR013083;IPR011364	Y	BRCA1	9606 [Organism: human] [Scientific Name: Homo sapiens]	Y	5	1T15-A02	24	47.91	51.26	0.4357	0.4662	0.6245	2.58	85	86
1T15	A	P38398	-	-	-	-	-	-	-	-	-	-	-	-	8.1	3	89	211	15	MOLECULE: BREAST CANCER TYPE 1 SUSCEPTIBILITY PROTEIN;	-	-	-	-	-	-	-	-	-	-	-	-	-	IPR001357;IPR018957;IPR001841;IPR025994;IPR017907;IPR013083;IPR011364	Y	BRCA1	9606 [Organism: human] [Scientific Name: Homo sapiens]	Y	3	1T15-A01	24	47.91	51.26	0.4357	0.4662	0.6245	2.58	85	86
1T15	A	P38398	-	-	-	-	-	-	-	-	-	-	-	-	8.1	3	89	211	15	MOLECULE: BREAST CANCER TYPE 1 SUSCEPTIBILITY PROTEIN;	-	-	-	-	-	-	-	-	-	-	-	-	-	IPR001357;IPR018957;IPR001841;IPR025994;IPR017907;IPR013083;IPR011364	Y	BRCA1	9606 [Organism: human] [Scientific Name: Homo sapiens]	Y	5	1T15-A02	24	47.91	51.26	0.4357	0.4662	0.6245	2.58	85	86
1T15	A	P38398	-	-	-	-	-	-	-	-	-	-	-	-	8.1	3	89	211	15	MOLECULE: BREAST CANCER TYPE 1 SUSCEPTIBILITY PROTEIN;	-	-	-	-	-	-	-	-	-	-	-	-	-	IPR001357;IPR018957;IPR001841;IPR025994;IPR017907;IPR013083;IPR011364	Y	BRCA1	9606 [Organism: human] [Scientific Name: Homo sapiens]	Y	5	1T15-A02	24	47.91	51.26	0.4357	0.4662	0.6245	2.58	85	86
1T15	A	P38398	-	-	-	-	-	-	-	-	-	-	-	-	8.1	3	89	211	15	MOLECULE: BREAST CANCER TYPE 1 SUSCEPTIBILITY PROTEIN;	-	-	-	-	-	-	-	-	-	-	-	-	-	IPR001357;IPR018957;IPR001841;IPR025994;IPR017907;IPR013083;IPR011364	Y	BRCA1	9606 [Organism: human] [Scientific Name: Homo sapiens]	Y	3	1T15-A01	24	47.91	51.26	0.4357	0.4662	0.6245	2.58	85	86
1T15	A	P38398	-	-	-	-	-	-	-	-	-	-	-	-	8.1	3	89	211	15	MOLECULE: BREAST CANCER TYPE 1 SUSCEPTIBILITY PROTEIN;	-	-	-	-	-	-	-	-	-	-	-	-	-	IPR001357;IPR018957;IPR001841;IPR025994;IPR017907;IPR013083;IPR011364	Y	BRCA1	9606 [Organism: human] [Scientific Name: Homo sapiens]	Y	5	1T15-A02	24	47.91	51.26	0.4357	0.4662	0.6245	2.58	85	86
3K0H	A	P38398	-	-	-	-	-	-	-	-	-	-	-	-	8	3	90	211	16	MOLECULE: BREAST CANCER TYPE 1 SUSCEPTIBILITY PROTEIN;	-	-	-	-	-	-	-	-	-	-	-	-	-	IPR001357;IPR018957;IPR001841;IPR025994;IPR017907;IPR013083;IPR011364	Y	BRCA1	9606 [Organism: human] [Scientific Name: Homo sapiens]	Y	5	1T15-A02	-	-	-	-	-	-	-	-	-
3K0H	A	P38398	-	-	-	-	-	-	-	-	-	-	-	-	8	3	90	211	16	MOLECULE: BREAST CANCER TYPE 1 SUSCEPTIBILITY PROTEIN;	-	-	-	-	-	-	-	-	-	-	-	-	-	IPR001357;IPR018957;IPR001841;IPR025994;IPR017907;IPR013083;IPR011364	Y	BRCA1	9606 [Organism: human] [Scientific Name: Homo sapiens]	Y	3	1T15-A01	-	-	-	-	-	-	-	-	-
3K0H	A	P38398	-	-	-	-	-	-	-	-	-	-	-	-	8	3	90	211	16	MOLECULE: BREAST CANCER TYPE 1 SUSCEPTIBILITY PROTEIN;	-	-	-	-	-	-	-	-	-	-	-	-	-	IPR001357;IPR018957;IPR001841;IPR025994;IPR017907;IPR013083;IPR011364	Y	BRCA1	9606 [Organism: human] [Scientific Name: Homo sapiens]	Y	5	1T15-A02	-	-	-	-	-	-	-	-	-
3K0H	A	P38398	-	-	-	-	-	-	-	-	-	-	-	-	8	3	90	211	16	MOLECULE: BREAST CANCER TYPE 1 SUSCEPTIBILITY PROTEIN;	-	-	-	-	-	-	-	-	-	-	-	-	-	IPR001357;IPR018957;IPR001841;IPR025994;IPR017907;IPR013083;IPR011364	Y	BRCA1	9606 [Organism: human] [Scientific Name: Homo sapiens]	Y	5	1T15-A02	-	-	-	-	-	-	-	-	-
3K0H	A	P38398	-	-	-	-	-	-	-	-	-	-	-	-	8	3	90	211	16	MOLECULE: BREAST CANCER TYPE 1 SUSCEPTIBILITY PROTEIN;	-	-	-	-	-	-	-	-	-	-	-	-	-	IPR001357;IPR018957;IPR001841;IPR025994;IPR017907;IPR013083;IPR011364	Y	BRCA1	9606 [Organism: human] [Scientific Name: Homo sapiens]	Y	3	1T15-A01	-	-	-	-	-	-	-	-	-
3K0H	A	P38398	-	-	-	-	-	-	-	-	-	-	-	-	8	3	90	211	16	MOLECULE: BREAST CANCER TYPE 1 SUSCEPTIBILITY PROTEIN;	-	-	-	-	-	-	-	-	-	-	-	-	-	IPR001357;IPR018957;IPR001841;IPR025994;IPR017907;IPR013083;IPR011364	Y	BRCA1	9606 [Organism: human] [Scientific Name: Homo sapiens]	Y	5	1T15-A02	-	-	-	-	-	-	-	-	-
3K0H	A	P38398	-	-	-	-	-	-	-	-	-	-	-	-	8	3	90	211	16	MOLECULE: BREAST CANCER TYPE 1 SUSCEPTIBILITY PROTEIN;	-	-	-	-	-	-	-	-	-	-	-	-	-	IPR001357;IPR018957;IPR001841;IPR025994;IPR017907;IPR013083;IPR011364	Y	BRCA1	9606 [Organism: human] [Scientific Name: Homo sapiens]	Y	5	1T15-A02	-	-	-	-	-	-	-	-	-
3K0H	A	P38398	-	-	-	-	-	-	-	-	-	-	-	-	8	3	90	211	16	MOLECULE: BREAST CANCER TYPE 1 SUSCEPTIBILITY PROTEIN;	-	-	-	-	-	-	-	-	-	-	-	-	-	IPR001357;IPR018957;IPR001841;IPR025994;IPR017907;IPR013083;IPR011364	Y	BRCA1	9606 [Organism: human] [Scientific Name: Homo sapiens]	Y	3	1T15-A01	-	-	-	-	-	-	-	-	-
3K0H	A	P38398	-	-	-	-	-	-	-	-	-	-	-	-	8	3	90	211	16	MOLECULE: BREAST CANCER TYPE 1 SUSCEPTIBILITY PROTEIN;	-	-	-	-	-	-	-	-	-	-	-	-	-	IPR001357;IPR018957;IPR001841;IPR025994;IPR017907;IPR013083;IPR011364	Y	BRCA1	9606 [Organism: human] [Scientific Name: Homo sapiens]	Y	5	1T15-A02	-	-	-	-	-	-	-	-	-
3K0H	A	P38398	-	-	-	-	-	-	-	-	-	-	-	-	8	3	90	211	16	MOLECULE: BREAST CANCER TYPE 1 SUSCEPTIBILITY PROTEIN;	-	-	-	-	-	-	-	-	-	-	-	-	-	IPR001357;IPR018957;IPR001841;IPR025994;IPR017907;IPR013083;IPR011364	Y	BRCA1	9606 [Organism: human] [Scientific Name: Homo sapiens]	Y	5	1T15-A02	-	-	-	-	-	-	-	-	-
3K0H	A	P38398	-	-	-	-	-	-	-	-	-	-	-	-	8	3	90	211	16	MOLECULE: BREAST CANCER TYPE 1 SUSCEPTIBILITY PROTEIN;	-	-	-	-	-	-	-	-	-	-	-	-	-	IPR001357;IPR018957;IPR001841;IPR025994;IPR017907;IPR013083;IPR011364	Y	BRCA1	9606 [Organism: human] [Scientific Name: Homo sapiens]	Y	3	1T15-A01	-	-	-	-	-	-	-	-	-
3K0H	A	P38398	-	-	-	-	-	-	-	-	-	-	-	-	8	3	90	211	16	MOLECULE: BREAST CANCER TYPE 1 SUSCEPTIBILITY PROTEIN;	-	-	-	-	-	-	-	-	-	-	-	-	-	IPR001357;IPR018957;IPR001841;IPR025994;IPR017907;IPR013083;IPR011364	Y	BRCA1	9606 [Organism: human] [Scientific Name: Homo sapiens]	Y	5	1T15-A02	-	-	-	-	-	-	-	-	-
3K0H	A	P38398	-	-	-	-	-	-	-	-	-	-	-	-	8	3	90	211	16	MOLECULE: BREAST CANCER TYPE 1 SUSCEPTIBILITY PROTEIN;	-	-	-	-	-	-	-	-	-	-	-	-	-	IPR001357;IPR018957;IPR001841;IPR025994;IPR017907;IPR013083;IPR011364	Y	BRCA1	9606 [Organism: human] [Scientific Name: Homo sapiens]	Y	5	1T15-A02	-	-	-	-	-	-	-	-	-
3K0H	A	P38398	-	-	-	-	-	-	-	-	-	-	-	-	8	3	90	211	16	MOLECULE: BREAST CANCER TYPE 1 SUSCEPTIBILITY PROTEIN;	-	-	-	-	-	-	-	-	-	-	-	-	-	IPR001357;IPR018957;IPR001841;IPR025994;IPR017907;IPR013083;IPR011364	Y	BRCA1	9606 [Organism: human] [Scientific Name: Homo sapiens]	Y	3	1T15-A01	-	-	-	-	-	-	-	-	-
3K0H	A	P38398	-	-	-	-	-	-	-	-	-	-	-	-	8	3	90	211	16	MOLECULE: BREAST CANCER TYPE 1 SUSCEPTIBILITY PROTEIN;	-	-	-	-	-	-	-	-	-	-	-	-	-	IPR001357;IPR018957;IPR001841;IPR025994;IPR017907;IPR013083;IPR011364	Y	BRCA1	9606 [Organism: human] [Scientific Name: Homo sapiens]	Y	5	1T15-A02	-	-	-	-	-	-	-	-	-
1T29	A	P38398	-	-	-	-	-	-	-	-	-	-	-	-	8	3	87	211	16	MOLECULE: BREAST CANCER TYPE 1 SUSCEPTIBILITY PROTEIN;	-	-	-	-	-	-	-	-	-	-	-	-	-	IPR001357;IPR018957;IPR001841;IPR025994;IPR017907;IPR013083;IPR011364	Y	BRCA1	9606 [Organism: human] [Scientific Name: Homo sapiens]	Y	5	1T15-A02	-	-	-	-	-	-	-	-	-
1T29	A	P38398	-	-	-	-	-	-	-	-	-	-	-	-	8	3	87	211	16	MOLECULE: BREAST CANCER TYPE 1 SUSCEPTIBILITY PROTEIN;	-	-	-	-	-	-	-	-	-	-	-	-	-	IPR001357;IPR018957;IPR001841;IPR025994;IPR017907;IPR013083;IPR011364	Y	BRCA1	9606 [Organism: human] [Scientific Name: Homo sapiens]	Y	3	1T15-A01	-	-	-	-	-	-	-	-	-
1T29	A	P38398	-	-	-	-	-	-	-	-	-	-	-	-	8	3	87	211	16	MOLECULE: BREAST CANCER TYPE 1 SUSCEPTIBILITY PROTEIN;	-	-	-	-	-	-	-	-	-	-	-	-	-	IPR001357;IPR018957;IPR001841;IPR025994;IPR017907;IPR013083;IPR011364	Y	BRCA1	9606 [Organism: human] [Scientific Name: Homo sapiens]	Y	5	1T15-A02	-	-	-	-	-	-	-	-	-
1T29	A	P38398	-	-	-	-	-	-	-	-	-	-	-	-	8	3	87	211	16	MOLECULE: BREAST CANCER TYPE 1 SUSCEPTIBILITY PROTEIN;	-	-	-	-	-	-	-	-	-	-	-	-	-	IPR001357;IPR018957;IPR001841;IPR025994;IPR017907;IPR013083;IPR011364	Y	BRCA1	9606 [Organism: human] [Scientific Name: Homo sapiens]	Y	5	1T15-A02	-	-	-	-	-	-	-	-	-
1T29	A	P38398	-	-	-	-	-	-	-	-	-	-	-	-	8	3	87	211	16	MOLECULE: BREAST CANCER TYPE 1 SUSCEPTIBILITY PROTEIN;	-	-	-	-	-	-	-	-	-	-	-	-	-	IPR001357;IPR018957;IPR001841;IPR025994;IPR017907;IPR013083;IPR011364	Y	BRCA1	9606 [Organism: human] [Scientific Name: Homo sapiens]	Y	3	1T15-A01	-	-	-	-	-	-	-	-	-
1T29	A	P38398	-	-	-	-	-	-	-	-	-	-	-	-	8	3	87	211	16	MOLECULE: BREAST CANCER TYPE 1 SUSCEPTIBILITY PROTEIN;	-	-	-	-	-	-	-	-	-	-	-	-	-	IPR001357;IPR018957;IPR001841;IPR025994;IPR017907;IPR013083;IPR011364	Y	BRCA1	9606 [Organism: human] [Scientific Name: Homo sapiens]	Y	5	1T15-A02	-	-	-	-	-	-	-	-	-
1T29	A	P38398	-	-	-	-	-	-	-	-	-	-	-	-	8	3	87	211	16	MOLECULE: BREAST CANCER TYPE 1 SUSCEPTIBILITY PROTEIN;	-	-	-	-	-	-	-	-	-	-	-	-	-	IPR001357;IPR018957;IPR001841;IPR025994;IPR017907;IPR013083;IPR011364	Y	BRCA1	9606 [Organism: human] [Scientific Name: Homo sapiens]	Y	5	1T15-A02	-	-	-	-	-	-	-	-	-
1T29	A	P38398	-	-	-	-	-	-	-	-	-	-	-	-	8	3	87	211	16	MOLECULE: BREAST CANCER TYPE 1 SUSCEPTIBILITY PROTEIN;	-	-	-	-	-	-	-	-	-	-	-	-	-	IPR001357;IPR018957;IPR001841;IPR025994;IPR017907;IPR013083;IPR011364	Y	BRCA1	9606 [Organism: human] [Scientific Name: Homo sapiens]	Y	3	1T15-A01	-	-	-	-	-	-	-	-	-
1T29	A	P38398	-	-	-	-	-	-	-	-	-	-	-	-	8	3	87	211	16	MOLECULE: BREAST CANCER TYPE 1 SUSCEPTIBILITY PROTEIN;	-	-	-	-	-	-	-	-	-	-	-	-	-	IPR001357;IPR018957;IPR001841;IPR025994;IPR017907;IPR013083;IPR011364	Y	BRCA1	9606 [Organism: human] [Scientific Name: Homo sapiens]	Y	5	1T15-A02	-	-	-	-	-	-	-	-	-
1T29	A	P38398	-	-	-	-	-	-	-	-	-	-	-	-	8	3	87	211	16	MOLECULE: BREAST CANCER TYPE 1 SUSCEPTIBILITY PROTEIN;	-	-	-	-	-	-	-	-	-	-	-	-	-	IPR001357;IPR018957;IPR001841;IPR025994;IPR017907;IPR013083;IPR011364	Y	BRCA1	9606 [Organism: human] [Scientific Name: Homo sapiens]	Y	5	1T15-A02	-	-	-	-	-	-	-	-	-
1T29	A	P38398	-	-	-	-	-	-	-	-	-	-	-	-	8	3	87	211	16	MOLECULE: BREAST CANCER TYPE 1 SUSCEPTIBILITY PROTEIN;	-	-	-	-	-	-	-	-	-	-	-	-	-	IPR001357;IPR018957;IPR001841;IPR025994;IPR017907;IPR013083;IPR011364	Y	BRCA1	9606 [Organism: human] [Scientific Name: Homo sapiens]	Y	3	1T15-A01	-	-	-	-	-	-	-	-	-
1T29	A	P38398	-	-	-	-	-	-	-	-	-	-	-	-	8	3	87	211	16	MOLECULE: BREAST CANCER TYPE 1 SUSCEPTIBILITY PROTEIN;	-	-	-	-	-	-	-	-	-	-	-	-	-	IPR001357;IPR018957;IPR001841;IPR025994;IPR017907;IPR013083;IPR011364	Y	BRCA1	9606 [Organism: human] [Scientific Name: Homo sapiens]	Y	5	1T15-A02	-	-	-	-	-	-	-	-	-
1T29	A	P38398	-	-	-	-	-	-	-	-	-	-	-	-	8	3	87	211	16	MOLECULE: BREAST CANCER TYPE 1 SUSCEPTIBILITY PROTEIN;	-	-	-	-	-	-	-	-	-	-	-	-	-	IPR001357;IPR018957;IPR001841;IPR025994;IPR017907;IPR013083;IPR011364	Y	BRCA1	9606 [Organism: human] [Scientific Name: Homo sapiens]	Y	5	1T15-A02	-	-	-	-	-	-	-	-	-
1T29	A	P38398	-	-	-	-	-	-	-	-	-	-	-	-	8	3	87	211	16	MOLECULE: BREAST CANCER TYPE 1 SUSCEPTIBILITY PROTEIN;	-	-	-	-	-	-	-	-	-	-	-	-	-	IPR001357;IPR018957;IPR001841;IPR025994;IPR017907;IPR013083;IPR011364	Y	BRCA1	9606 [Organism: human] [Scientific Name: Homo sapiens]	Y	3	1T15-A01	-	-	-	-	-	-	-	-	-
1T29	A	P38398	-	-	-	-	-	-	-	-	-	-	-	-	8	3	87	211	16	MOLECULE: BREAST CANCER TYPE 1 SUSCEPTIBILITY PROTEIN;	-	-	-	-	-	-	-	-	-	-	-	-	-	IPR001357;IPR018957;IPR001841;IPR025994;IPR017907;IPR013083;IPR011364	Y	BRCA1	9606 [Organism: human] [Scientific Name: Homo sapiens]	Y	5	1T15-A02	-	-	-	-	-	-	-	-	-
3K16	A	P38398	-	-	-	-	-	-	-	-	-	-	-	-	8	2.9	87	211	17	MOLECULE: BREAST CANCER TYPE 1 SUSCEPTIBILITY PROTEIN;	-	-	-	-	-	-	-	-	-	-	-	-	-	IPR001357;IPR018957;IPR001841;IPR025994;IPR017907;IPR013083;IPR011364	Y	BRCA1	9606 [Organism: human] [Scientific Name: Homo sapiens]	Y	5	1T15-A02	-	-	-	-	-	-	-	-	-
3K16	A	P38398	-	-	-	-	-	-	-	-	-	-	-	-	8	2.9	87	211	17	MOLECULE: BREAST CANCER TYPE 1 SUSCEPTIBILITY PROTEIN;	-	-	-	-	-	-	-	-	-	-	-	-	-	IPR001357;IPR018957;IPR001841;IPR025994;IPR017907;IPR013083;IPR011364	Y	BRCA1	9606 [Organism: human] [Scientific Name: Homo sapiens]	Y	3	1T15-A01	-	-	-	-	-	-	-	-	-
3K16	A	P38398	-	-	-	-	-	-	-	-	-	-	-	-	8	2.9	87	211	17	MOLECULE: BREAST CANCER TYPE 1 SUSCEPTIBILITY PROTEIN;	-	-	-	-	-	-	-	-	-	-	-	-	-	IPR001357;IPR018957;IPR001841;IPR025994;IPR017907;IPR013083;IPR011364	Y	BRCA1	9606 [Organism: human] [Scientific Name: Homo sapiens]	Y	5	1T15-A02	-	-	-	-	-	-	-	-	-
3K16	A	P38398	-	-	-	-	-	-	-	-	-	-	-	-	8	2.9	87	211	17	MOLECULE: BREAST CANCER TYPE 1 SUSCEPTIBILITY PROTEIN;	-	-	-	-	-	-	-	-	-	-	-	-	-	IPR001357;IPR018957;IPR001841;IPR025994;IPR017907;IPR013083;IPR011364	Y	BRCA1	9606 [Organism: human] [Scientific Name: Homo sapiens]	Y	5	1T15-A02	-	-	-	-	-	-	-	-	-
3K16	A	P38398	-	-	-	-	-	-	-	-	-	-	-	-	8	2.9	87	211	17	MOLECULE: BREAST CANCER TYPE 1 SUSCEPTIBILITY PROTEIN;	-	-	-	-	-	-	-	-	-	-	-	-	-	IPR001357;IPR018957;IPR001841;IPR025994;IPR017907;IPR013083;IPR011364	Y	BRCA1	9606 [Organism: human] [Scientific Name: Homo sapiens]	Y	3	1T15-A01	-	-	-	-	-	-	-	-	-
3K16	A	P38398	-	-	-	-	-	-	-	-	-	-	-	-	8	2.9	87	211	17	MOLECULE: BREAST CANCER TYPE 1 SUSCEPTIBILITY PROTEIN;	-	-	-	-	-	-	-	-	-	-	-	-	-	IPR001357;IPR018957;IPR001841;IPR025994;IPR017907;IPR013083;IPR011364	Y	BRCA1	9606 [Organism: human] [Scientific Name: Homo sapiens]	Y	5	1T15-A02	-	-	-	-	-	-	-	-	-
3K16	A	P38398	-	-	-	-	-	-	-	-	-	-	-	-	8	2.9	87	211	17	MOLECULE: BREAST CANCER TYPE 1 SUSCEPTIBILITY PROTEIN;	-	-	-	-	-	-	-	-	-	-	-	-	-	IPR001357;IPR018957;IPR001841;IPR025994;IPR017907;IPR013083;IPR011364	Y	BRCA1	9606 [Organism: human] [Scientific Name: Homo sapiens]	Y	5	1T15-A02	-	-	-	-	-	-	-	-	-
3K16	A	P38398	-	-	-	-	-	-	-	-	-	-	-	-	8	2.9	87	211	17	MOLECULE: BREAST CANCER TYPE 1 SUSCEPTIBILITY PROTEIN;	-	-	-	-	-	-	-	-	-	-	-	-	-	IPR001357;IPR018957;IPR001841;IPR025994;IPR017907;IPR013083;IPR011364	Y	BRCA1	9606 [Organism: human] [Scientific Name: Homo sapiens]	Y	3	1T15-A01	-	-	-	-	-	-	-	-	-
3K16	A	P38398	-	-	-	-	-	-	-	-	-	-	-	-	8	2.9	87	211	17	MOLECULE: BREAST CANCER TYPE 1 SUSCEPTIBILITY PROTEIN;	-	-	-	-	-	-	-	-	-	-	-	-	-	IPR001357;IPR018957;IPR001841;IPR025994;IPR017907;IPR013083;IPR011364	Y	BRCA1	9606 [Organism: human] [Scientific Name: Homo sapiens]	Y	5	1T15-A02	-	-	-	-	-	-	-	-	-
3K16	A	P38398	-	-	-	-	-	-	-	-	-	-	-	-	8	2.9	87	211	17	MOLECULE: BREAST CANCER TYPE 1 SUSCEPTIBILITY PROTEIN;	-	-	-	-	-	-	-	-	-	-	-	-	-	IPR001357;IPR018957;IPR001841;IPR025994;IPR017907;IPR013083;IPR011364	Y	BRCA1	9606 [Organism: human] [Scientific Name: Homo sapiens]	Y	5	1T15-A02	-	-	-	-	-	-	-	-	-
3K16	A	P38398	-	-	-	-	-	-	-	-	-	-	-	-	8	2.9	87	211	17	MOLECULE: BREAST CANCER TYPE 1 SUSCEPTIBILITY PROTEIN;	-	-	-	-	-	-	-	-	-	-	-	-	-	IPR001357;IPR018957;IPR001841;IPR025994;IPR017907;IPR013083;IPR011364	Y	BRCA1	9606 [Organism: human] [Scientific Name: Homo sapiens]	Y	3	1T15-A01	-	-	-	-	-	-	-	-	-
3K16	A	P38398	-	-	-	-	-	-	-	-	-	-	-	-	8	2.9	87	211	17	MOLECULE: BREAST CANCER TYPE 1 SUSCEPTIBILITY PROTEIN;	-	-	-	-	-	-	-	-	-	-	-	-	-	IPR001357;IPR018957;IPR001841;IPR025994;IPR017907;IPR013083;IPR011364	Y	BRCA1	9606 [Organism: human] [Scientific Name: Homo sapiens]	Y	5	1T15-A02	-	-	-	-	-	-	-	-	-
3K16	A	P38398	-	-	-	-	-	-	-	-	-	-	-	-	8	2.9	87	211	17	MOLECULE: BREAST CANCER TYPE 1 SUSCEPTIBILITY PROTEIN;	-	-	-	-	-	-	-	-	-	-	-	-	-	IPR001357;IPR018957;IPR001841;IPR025994;IPR017907;IPR013083;IPR011364	Y	BRCA1	9606 [Organism: human] [Scientific Name: Homo sapiens]	Y	5	1T15-A02	-	-	-	-	-	-	-	-	-
3K16	A	P38398	-	-	-	-	-	-	-	-	-	-	-	-	8	2.9	87	211	17	MOLECULE: BREAST CANCER TYPE 1 SUSCEPTIBILITY PROTEIN;	-	-	-	-	-	-	-	-	-	-	-	-	-	IPR001357;IPR018957;IPR001841;IPR025994;IPR017907;IPR013083;IPR011364	Y	BRCA1	9606 [Organism: human] [Scientific Name: Homo sapiens]	Y	3	1T15-A01	-	-	-	-	-	-	-	-	-
3K16	A	P38398	-	-	-	-	-	-	-	-	-	-	-	-	8	2.9	87	211	17	MOLECULE: BREAST CANCER TYPE 1 SUSCEPTIBILITY PROTEIN;	-	-	-	-	-	-	-	-	-	-	-	-	-	IPR001357;IPR018957;IPR001841;IPR025994;IPR017907;IPR013083;IPR011364	Y	BRCA1	9606 [Organism: human] [Scientific Name: Homo sapiens]	Y	5	1T15-A02	-	-	-	-	-	-	-	-	-
1T2V	C	P38398	-	-	-	-	-	-	-	-	-	-	-	-	8	2.9	87	202	15	MOLECULE: BREAST CANCER TYPE 1 SUSCEPTIBILITY PROTEIN;	-	-	-	-	-	-	-	-	-	-	-	-	-	IPR001357;IPR018957;IPR001841;IPR025994;IPR017907;IPR013083;IPR011364	Y	BRCA1	9606 [Organism: human] [Scientific Name: Homo sapiens]	Y	5	1T15-A02	-	-	-	-	-	-	-	-	-
1T2V	C	P38398	-	-	-	-	-	-	-	-	-	-	-	-	8	2.9	87	202	15	MOLECULE: BREAST CANCER TYPE 1 SUSCEPTIBILITY PROTEIN;	-	-	-	-	-	-	-	-	-	-	-	-	-	IPR001357;IPR018957;IPR001841;IPR025994;IPR017907;IPR013083;IPR011364	Y	BRCA1	9606 [Organism: human] [Scientific Name: Homo sapiens]	Y	3	1T15-A01	-	-	-	-	-	-	-	-	-
1T2V	C	P38398	-	-	-	-	-	-	-	-	-	-	-	-	8	2.9	87	202	15	MOLECULE: BREAST CANCER TYPE 1 SUSCEPTIBILITY PROTEIN;	-	-	-	-	-	-	-	-	-	-	-	-	-	IPR001357;IPR018957;IPR001841;IPR025994;IPR017907;IPR013083;IPR011364	Y	BRCA1	9606 [Organism: human] [Scientific Name: Homo sapiens]	Y	5	1T15-A02	-	-	-	-	-	-	-	-	-
1T2V	C	P38398	-	-	-	-	-	-	-	-	-	-	-	-	8	2.9	87	202	15	MOLECULE: BREAST CANCER TYPE 1 SUSCEPTIBILITY PROTEIN;	-	-	-	-	-	-	-	-	-	-	-	-	-	IPR001357;IPR018957;IPR001841;IPR025994;IPR017907;IPR013083;IPR011364	Y	BRCA1	9606 [Organism: human] [Scientific Name: Homo sapiens]	Y	5	1T15-A02	-	-	-	-	-	-	-	-	-
1T2V	C	P38398	-	-	-	-	-	-	-	-	-	-	-	-	8	2.9	87	202	15	MOLECULE: BREAST CANCER TYPE 1 SUSCEPTIBILITY PROTEIN;	-	-	-	-	-	-	-	-	-	-	-	-	-	IPR001357;IPR018957;IPR001841;IPR025994;IPR017907;IPR013083;IPR011364	Y	BRCA1	9606 [Organism: human] [Scientific Name: Homo sapiens]	Y	3	1T15-A01	-	-	-	-	-	-	-	-	-
1T2V	C	P38398	-	-	-	-	-	-	-	-	-	-	-	-	8	2.9	87	202	15	MOLECULE: BREAST CANCER TYPE 1 SUSCEPTIBILITY PROTEIN;	-	-	-	-	-	-	-	-	-	-	-	-	-	IPR001357;IPR018957;IPR001841;IPR025994;IPR017907;IPR013083;IPR011364	Y	BRCA1	9606 [Organism: human] [Scientific Name: Homo sapiens]	Y	5	1T15-A02	-	-	-	-	-	-	-	-	-
1T2V	C	P38398	-	-	-	-	-	-	-	-	-	-	-	-	8	2.9	87	202	15	MOLECULE: BREAST CANCER TYPE 1 SUSCEPTIBILITY PROTEIN;	-	-	-	-	-	-	-	-	-	-	-	-	-	IPR001357;IPR018957;IPR001841;IPR025994;IPR017907;IPR013083;IPR011364	Y	BRCA1	9606 [Organism: human] [Scientific Name: Homo sapiens]	Y	5	1T15-A02	-	-	-	-	-	-	-	-	-
1T2V	C	P38398	-	-	-	-	-	-	-	-	-	-	-	-	8	2.9	87	202	15	MOLECULE: BREAST CANCER TYPE 1 SUSCEPTIBILITY PROTEIN;	-	-	-	-	-	-	-	-	-	-	-	-	-	IPR001357;IPR018957;IPR001841;IPR025994;IPR017907;IPR013083;IPR011364	Y	BRCA1	9606 [Organism: human] [Scientific Name: Homo sapiens]	Y	3	1T15-A01	-	-	-	-	-	-	-	-	-
1T2V	C	P38398	-	-	-	-	-	-	-	-	-	-	-	-	8	2.9	87	202	15	MOLECULE: BREAST CANCER TYPE 1 SUSCEPTIBILITY PROTEIN;	-	-	-	-	-	-	-	-	-	-	-	-	-	IPR001357;IPR018957;IPR001841;IPR025994;IPR017907;IPR013083;IPR011364	Y	BRCA1	9606 [Organism: human] [Scientific Name: Homo sapiens]	Y	5	1T15-A02	-	-	-	-	-	-	-	-	-
1T2V	C	P38398	-	-	-	-	-	-	-	-	-	-	-	-	8	2.9	87	202	15	MOLECULE: BREAST CANCER TYPE 1 SUSCEPTIBILITY PROTEIN;	-	-	-	-	-	-	-	-	-	-	-	-	-	IPR001357;IPR018957;IPR001841;IPR025994;IPR017907;IPR013083;IPR011364	Y	BRCA1	9606 [Organism: human] [Scientific Name: Homo sapiens]	Y	5	1T15-A02	-	-	-	-	-	-	-	-	-
1T2V	C	P38398	-	-	-	-	-	-	-	-	-	-	-	-	8	2.9	87	202	15	MOLECULE: BREAST CANCER TYPE 1 SUSCEPTIBILITY PROTEIN;	-	-	-	-	-	-	-	-	-	-	-	-	-	IPR001357;IPR018957;IPR001841;IPR025994;IPR017907;IPR013083;IPR011364	Y	BRCA1	9606 [Organism: human] [Scientific Name: Homo sapiens]	Y	3	1T15-A01	-	-	-	-	-	-	-	-	-
1T2V	C	P38398	-	-	-	-	-	-	-	-	-	-	-	-	8	2.9	87	202	15	MOLECULE: BREAST CANCER TYPE 1 SUSCEPTIBILITY PROTEIN;	-	-	-	-	-	-	-	-	-	-	-	-	-	IPR001357;IPR018957;IPR001841;IPR025994;IPR017907;IPR013083;IPR011364	Y	BRCA1	9606 [Organism: human] [Scientific Name: Homo sapiens]	Y	5	1T15-A02	-	-	-	-	-	-	-	-	-
1T2V	C	P38398	-	-	-	-	-	-	-	-	-	-	-	-	8	2.9	87	202	15	MOLECULE: BREAST CANCER TYPE 1 SUSCEPTIBILITY PROTEIN;	-	-	-	-	-	-	-	-	-	-	-	-	-	IPR001357;IPR018957;IPR001841;IPR025994;IPR017907;IPR013083;IPR011364	Y	BRCA1	9606 [Organism: human] [Scientific Name: Homo sapiens]	Y	5	1T15-A02	-	-	-	-	-	-	-	-	-
1T2V	C	P38398	-	-	-	-	-	-	-	-	-	-	-	-	8	2.9	87	202	15	MOLECULE: BREAST CANCER TYPE 1 SUSCEPTIBILITY PROTEIN;	-	-	-	-	-	-	-	-	-	-	-	-	-	IPR001357;IPR018957;IPR001841;IPR025994;IPR017907;IPR013083;IPR011364	Y	BRCA1	9606 [Organism: human] [Scientific Name: Homo sapiens]	Y	3	1T15-A01	-	-	-	-	-	-	-	-	-
1T2V	C	P38398	-	-	-	-	-	-	-	-	-	-	-	-	8	2.9	87	202	15	MOLECULE: BREAST CANCER TYPE 1 SUSCEPTIBILITY PROTEIN;	-	-	-	-	-	-	-	-	-	-	-	-	-	IPR001357;IPR018957;IPR001841;IPR025994;IPR017907;IPR013083;IPR011364	Y	BRCA1	9606 [Organism: human] [Scientific Name: Homo sapiens]	Y	5	1T15-A02	-	-	-	-	-	-	-	-	-
3COJ	E	P38398	-	-	-	-	-	-	-	-	-	-	-	-	8	3	87	207	16	MOLECULE: BREAST CANCER TYPE 1 SUSCEPTIBILITY PROTEIN;	-	-	-	-	-	-	-	-	-	-	-	-	-	IPR001357;IPR018957;IPR001841;IPR025994;IPR017907;IPR013083;IPR011364	Y	BRCA1	9606 [Organism: human] [Scientific Name: Homo sapiens]	Y	5	1T15-A02	-	-	-	-	-	-	-	-	-
3COJ	E	P38398	-	-	-	-	-	-	-	-	-	-	-	-	8	3	87	207	16	MOLECULE: BREAST CANCER TYPE 1 SUSCEPTIBILITY PROTEIN;	-	-	-	-	-	-	-	-	-	-	-	-	-	IPR001357;IPR018957;IPR001841;IPR025994;IPR017907;IPR013083;IPR011364	Y	BRCA1	9606 [Organism: human] [Scientific Name: Homo sapiens]	Y	3	1T15-A01	-	-	-	-	-	-	-	-	-
3COJ	E	P38398	-	-	-	-	-	-	-	-	-	-	-	-	8	3	87	207	16	MOLECULE: BREAST CANCER TYPE 1 SUSCEPTIBILITY PROTEIN;	-	-	-	-	-	-	-	-	-	-	-	-	-	IPR001357;IPR018957;IPR001841;IPR025994;IPR017907;IPR013083;IPR011364	Y	BRCA1	9606 [Organism: human] [Scientific Name: Homo sapiens]	Y	5	1T15-A02	-	-	-	-	-	-	-	-	-
3COJ	E	P38398	-	-	-	-	-	-	-	-	-	-	-	-	8	3	87	207	16	MOLECULE: BREAST CANCER TYPE 1 SUSCEPTIBILITY PROTEIN;	-	-	-	-	-	-	-	-	-	-	-	-	-	IPR001357;IPR018957;IPR001841;IPR025994;IPR017907;IPR013083;IPR011364	Y	BRCA1	9606 [Organism: human] [Scientific Name: Homo sapiens]	Y	5	1T15-A02	-	-	-	-	-	-	-	-	-
3COJ	E	P38398	-	-	-	-	-	-	-	-	-	-	-	-	8	3	87	207	16	MOLECULE: BREAST CANCER TYPE 1 SUSCEPTIBILITY PROTEIN;	-	-	-	-	-	-	-	-	-	-	-	-	-	IPR001357;IPR018957;IPR001841;IPR025994;IPR017907;IPR013083;IPR011364	Y	BRCA1	9606 [Organism: human] [Scientific Name: Homo sapiens]	Y	3	1T15-A01	-	-	-	-	-	-	-	-	-
3COJ	E	P38398	-	-	-	-	-	-	-	-	-	-	-	-	8	3	87	207	16	MOLECULE: BREAST CANCER TYPE 1 SUSCEPTIBILITY PROTEIN;	-	-	-	-	-	-	-	-	-	-	-	-	-	IPR001357;IPR018957;IPR001841;IPR025994;IPR017907;IPR013083;IPR011364	Y	BRCA1	9606 [Organism: human] [Scientific Name: Homo sapiens]	Y	5	1T15-A02	-	-	-	-	-	-	-	-	-
3COJ	E	P38398	-	-	-	-	-	-	-	-	-	-	-	-	8	3	87	207	16	MOLECULE: BREAST CANCER TYPE 1 SUSCEPTIBILITY PROTEIN;	-	-	-	-	-	-	-	-	-	-	-	-	-	IPR001357;IPR018957;IPR001841;IPR025994;IPR017907;IPR013083;IPR011364	Y	BRCA1	9606 [Organism: human] [Scientific Name: Homo sapiens]	Y	5	1T15-A02	-	-	-	-	-	-	-	-	-
3COJ	E	P38398	-	-	-	-	-	-	-	-	-	-	-	-	8	3	87	207	16	MOLECULE: BREAST CANCER TYPE 1 SUSCEPTIBILITY PROTEIN;	-	-	-	-	-	-	-	-	-	-	-	-	-	IPR001357;IPR018957;IPR001841;IPR025994;IPR017907;IPR013083;IPR011364	Y	BRCA1	9606 [Organism: human] [Scientific Name: Homo sapiens]	Y	3	1T15-A01	-	-	-	-	-	-	-	-	-
3COJ	E	P38398	-	-	-	-	-	-	-	-	-	-	-	-	8	3	87	207	16	MOLECULE: BREAST CANCER TYPE 1 SUSCEPTIBILITY PROTEIN;	-	-	-	-	-	-	-	-	-	-	-	-	-	IPR001357;IPR018957;IPR001841;IPR025994;IPR017907;IPR013083;IPR011364	Y	BRCA1	9606 [Organism: human] [Scientific Name: Homo sapiens]	Y	5	1T15-A02	-	-	-	-	-	-	-	-	-
3COJ	E	P38398	-	-	-	-	-	-	-	-	-	-	-	-	8	3	87	207	16	MOLECULE: BREAST CANCER TYPE 1 SUSCEPTIBILITY PROTEIN;	-	-	-	-	-	-	-	-	-	-	-	-	-	IPR001357;IPR018957;IPR001841;IPR025994;IPR017907;IPR013083;IPR011364	Y	BRCA1	9606 [Organism: human] [Scientific Name: Homo sapiens]	Y	5	1T15-A02	-	-	-	-	-	-	-	-	-
3COJ	E	P38398	-	-	-	-	-	-	-	-	-	-	-	-	8	3	87	207	16	MOLECULE: BREAST CANCER TYPE 1 SUSCEPTIBILITY PROTEIN;	-	-	-	-	-	-	-	-	-	-	-	-	-	IPR001357;IPR018957;IPR001841;IPR025994;IPR017907;IPR013083;IPR011364	Y	BRCA1	9606 [Organism: human] [Scientific Name: Homo sapiens]	Y	3	1T15-A01	-	-	-	-	-	-	-	-	-
3COJ	E	P38398	-	-	-	-	-	-	-	-	-	-	-	-	8	3	87	207	16	MOLECULE: BREAST CANCER TYPE 1 SUSCEPTIBILITY PROTEIN;	-	-	-	-	-	-	-	-	-	-	-	-	-	IPR001357;IPR018957;IPR001841;IPR025994;IPR017907;IPR013083;IPR011364	Y	BRCA1	9606 [Organism: human] [Scientific Name: Homo sapiens]	Y	5	1T15-A02	-	-	-	-	-	-	-	-	-
3COJ	E	P38398	-	-	-	-	-	-	-	-	-	-	-	-	8	3	87	207	16	MOLECULE: BREAST CANCER TYPE 1 SUSCEPTIBILITY PROTEIN;	-	-	-	-	-	-	-	-	-	-	-	-	-	IPR001357;IPR018957;IPR001841;IPR025994;IPR017907;IPR013083;IPR011364	Y	BRCA1	9606 [Organism: human] [Scientific Name: Homo sapiens]	Y	5	1T15-A02	-	-	-	-	-	-	-	-	-
3COJ	E	P38398	-	-	-	-	-	-	-	-	-	-	-	-	8	3	87	207	16	MOLECULE: BREAST CANCER TYPE 1 SUSCEPTIBILITY PROTEIN;	-	-	-	-	-	-	-	-	-	-	-	-	-	IPR001357;IPR018957;IPR001841;IPR025994;IPR017907;IPR013083;IPR011364	Y	BRCA1	9606 [Organism: human] [Scientific Name: Homo sapiens]	Y	3	1T15-A01	-	-	-	-	-	-	-	-	-
3COJ	E	P38398	-	-	-	-	-	-	-	-	-	-	-	-	8	3	87	207	16	MOLECULE: BREAST CANCER TYPE 1 SUSCEPTIBILITY PROTEIN;	-	-	-	-	-	-	-	-	-	-	-	-	-	IPR001357;IPR018957;IPR001841;IPR025994;IPR017907;IPR013083;IPR011364	Y	BRCA1	9606 [Organism: human] [Scientific Name: Homo sapiens]	Y	5	1T15-A02	-	-	-	-	-	-	-	-	-
1T2V	E	P38398	-	-	-	-	-	-	-	-	-	-	-	-	7.9	3	88	211	15	MOLECULE: BREAST CANCER TYPE 1 SUSCEPTIBILITY PROTEIN;	-	-	-	-	-	-	-	-	-	-	-	-	-	IPR001357;IPR018957;IPR001841;IPR025994;IPR017907;IPR013083;IPR011364	Y	BRCA1	9606 [Organism: human] [Scientific Name: Homo sapiens]	Y	5	1T15-A02	-	-	-	-	-	-	-	-	-
1T2V	E	P38398	-	-	-	-	-	-	-	-	-	-	-	-	7.9	3	88	211	15	MOLECULE: BREAST CANCER TYPE 1 SUSCEPTIBILITY PROTEIN;	-	-	-	-	-	-	-	-	-	-	-	-	-	IPR001357;IPR018957;IPR001841;IPR025994;IPR017907;IPR013083;IPR011364	Y	BRCA1	9606 [Organism: human] [Scientific Name: Homo sapiens]	Y	3	1T15-A01	-	-	-	-	-	-	-	-	-
1T2V	E	P38398	-	-	-	-	-	-	-	-	-	-	-	-	7.9	3	88	211	15	MOLECULE: BREAST CANCER TYPE 1 SUSCEPTIBILITY PROTEIN;	-	-	-	-	-	-	-	-	-	-	-	-	-	IPR001357;IPR018957;IPR001841;IPR025994;IPR017907;IPR013083;IPR011364	Y	BRCA1	9606 [Organism: human] [Scientific Name: Homo sapiens]	Y	5	1T15-A02	-	-	-	-	-	-	-	-	-
1T2V	E	P38398	-	-	-	-	-	-	-	-	-	-	-	-	7.9	3	88	211	15	MOLECULE: BREAST CANCER TYPE 1 SUSCEPTIBILITY PROTEIN;	-	-	-	-	-	-	-	-	-	-	-	-	-	IPR001357;IPR018957;IPR001841;IPR025994;IPR017907;IPR013083;IPR011364	Y	BRCA1	9606 [Organism: human] [Scientific Name: Homo sapiens]	Y	5	1T15-A02	-	-	-	-	-	-	-	-	-
1T2V	E	P38398	-	-	-	-	-	-	-	-	-	-	-	-	7.9	3	88	211	15	MOLECULE: BREAST CANCER TYPE 1 SUSCEPTIBILITY PROTEIN;	-	-	-	-	-	-	-	-	-	-	-	-	-	IPR001357;IPR018957;IPR001841;IPR025994;IPR017907;IPR013083;IPR011364	Y	BRCA1	9606 [Organism: human] [Scientific Name: Homo sapiens]	Y	3	1T15-A01	-	-	-	-	-	-	-	-	-
1T2V	E	P38398	-	-	-	-	-	-	-	-	-	-	-	-	7.9	3	88	211	15	MOLECULE: BREAST CANCER TYPE 1 SUSCEPTIBILITY PROTEIN;	-	-	-	-	-	-	-	-	-	-	-	-	-	IPR001357;IPR018957;IPR001841;IPR025994;IPR017907;IPR013083;IPR011364	Y	BRCA1	9606 [Organism: human] [Scientific Name: Homo sapiens]	Y	5	1T15-A02	-	-	-	-	-	-	-	-	-
1T2V	E	P38398	-	-	-	-	-	-	-	-	-	-	-	-	7.9	3	88	211	15	MOLECULE: BREAST CANCER TYPE 1 SUSCEPTIBILITY PROTEIN;	-	-	-	-	-	-	-	-	-	-	-	-	-	IPR001357;IPR018957;IPR001841;IPR025994;IPR017907;IPR013083;IPR011364	Y	BRCA1	9606 [Organism: human] [Scientific Name: Homo sapiens]	Y	5	1T15-A02	-	-	-	-	-	-	-	-	-
1T2V	E	P38398	-	-	-	-	-	-	-	-	-	-	-	-	7.9	3	88	211	15	MOLECULE: BREAST CANCER TYPE 1 SUSCEPTIBILITY PROTEIN;	-	-	-	-	-	-	-	-	-	-	-	-	-	IPR001357;IPR018957;IPR001841;IPR025994;IPR017907;IPR013083;IPR011364	Y	BRCA1	9606 [Organism: human] [Scientific Name: Homo sapiens]	Y	3	1T15-A01	-	-	-	-	-	-	-	-	-
1T2V	E	P38398	-	-	-	-	-	-	-	-	-	-	-	-	7.9	3	88	211	15	MOLECULE: BREAST CANCER TYPE 1 SUSCEPTIBILITY PROTEIN;	-	-	-	-	-	-	-	-	-	-	-	-	-	IPR001357;IPR018957;IPR001841;IPR025994;IPR017907;IPR013083;IPR011364	Y	BRCA1	9606 [Organism: human] [Scientific Name: Homo sapiens]	Y	5	1T15-A02	-	-	-	-	-	-	-	-	-
1T2V	E	P38398	-	-	-	-	-	-	-	-	-	-	-	-	7.9	3	88	211	15	MOLECULE: BREAST CANCER TYPE 1 SUSCEPTIBILITY PROTEIN;	-	-	-	-	-	-	-	-	-	-	-	-	-	IPR001357;IPR018957;IPR001841;IPR025994;IPR017907;IPR013083;IPR011364	Y	BRCA1	9606 [Organism: human] [Scientific Name: Homo sapiens]	Y	5	1T15-A02	-	-	-	-	-	-	-	-	-
1T2V	E	P38398	-	-	-	-	-	-	-	-	-	-	-	-	7.9	3	88	211	15	MOLECULE: BREAST CANCER TYPE 1 SUSCEPTIBILITY PROTEIN;	-	-	-	-	-	-	-	-	-	-	-	-	-	IPR001357;IPR018957;IPR001841;IPR025994;IPR017907;IPR013083;IPR011364	Y	BRCA1	9606 [Organism: human] [Scientific Name: Homo sapiens]	Y	3	1T15-A01	-	-	-	-	-	-	-	-	-
1T2V	E	P38398	-	-	-	-	-	-	-	-	-	-	-	-	7.9	3	88	211	15	MOLECULE: BREAST CANCER TYPE 1 SUSCEPTIBILITY PROTEIN;	-	-	-	-	-	-	-	-	-	-	-	-	-	IPR001357;IPR018957;IPR001841;IPR025994;IPR017907;IPR013083;IPR011364	Y	BRCA1	9606 [Organism: human] [Scientific Name: Homo sapiens]	Y	5	1T15-A02	-	-	-	-	-	-	-	-	-
1T2V	E	P38398	-	-	-	-	-	-	-	-	-	-	-	-	7.9	3	88	211	15	MOLECULE: BREAST CANCER TYPE 1 SUSCEPTIBILITY PROTEIN;	-	-	-	-	-	-	-	-	-	-	-	-	-	IPR001357;IPR018957;IPR001841;IPR025994;IPR017907;IPR013083;IPR011364	Y	BRCA1	9606 [Organism: human] [Scientific Name: Homo sapiens]	Y	5	1T15-A02	-	-	-	-	-	-	-	-	-
1T2V	E	P38398	-	-	-	-	-	-	-	-	-	-	-	-	7.9	3	88	211	15	MOLECULE: BREAST CANCER TYPE 1 SUSCEPTIBILITY PROTEIN;	-	-	-	-	-	-	-	-	-	-	-	-	-	IPR001357;IPR018957;IPR001841;IPR025994;IPR017907;IPR013083;IPR011364	Y	BRCA1	9606 [Organism: human] [Scientific Name: Homo sapiens]	Y	3	1T15-A01	-	-	-	-	-	-	-	-	-
1T2V	E	P38398	-	-	-	-	-	-	-	-	-	-	-	-	7.9	3	88	211	15	MOLECULE: BREAST CANCER TYPE 1 SUSCEPTIBILITY PROTEIN;	-	-	-	-	-	-	-	-	-	-	-	-	-	IPR001357;IPR018957;IPR001841;IPR025994;IPR017907;IPR013083;IPR011364	Y	BRCA1	9606 [Organism: human] [Scientific Name: Homo sapiens]	Y	5	1T15-A02	-	-	-	-	-	-	-	-	-
3K15	A	P38398	-	-	-	-	-	-	-	-	-	-	-	-	7.9	2.9	87	211	16	MOLECULE: BREAST CANCER TYPE 1 SUSCEPTIBILITY PROTEIN;	-	-	-	-	-	-	-	-	-	-	-	-	-	IPR001357;IPR018957;IPR001841;IPR025994;IPR017907;IPR013083;IPR011364	Y	BRCA1	9606 [Organism: human] [Scientific Name: Homo sapiens]	Y	5	1T15-A02	-	-	-	-	-	-	-	-	-
3K15	A	P38398	-	-	-	-	-	-	-	-	-	-	-	-	7.9	2.9	87	211	16	MOLECULE: BREAST CANCER TYPE 1 SUSCEPTIBILITY PROTEIN;	-	-	-	-	-	-	-	-	-	-	-	-	-	IPR001357;IPR018957;IPR001841;IPR025994;IPR017907;IPR013083;IPR011364	Y	BRCA1	9606 [Organism: human] [Scientific Name: Homo sapiens]	Y	3	1T15-A01	-	-	-	-	-	-	-	-	-
3K15	A	P38398	-	-	-	-	-	-	-	-	-	-	-	-	7.9	2.9	87	211	16	MOLECULE: BREAST CANCER TYPE 1 SUSCEPTIBILITY PROTEIN;	-	-	-	-	-	-	-	-	-	-	-	-	-	IPR001357;IPR018957;IPR001841;IPR025994;IPR017907;IPR013083;IPR011364	Y	BRCA1	9606 [Organism: human] [Scientific Name: Homo sapiens]	Y	5	1T15-A02	-	-	-	-	-	-	-	-	-
3K15	A	P38398	-	-	-	-	-	-	-	-	-	-	-	-	7.9	2.9	87	211	16	MOLECULE: BREAST CANCER TYPE 1 SUSCEPTIBILITY PROTEIN;	-	-	-	-	-	-	-	-	-	-	-	-	-	IPR001357;IPR018957;IPR001841;IPR025994;IPR017907;IPR013083;IPR011364	Y	BRCA1	9606 [Organism: human] [Scientific Name: Homo sapiens]	Y	5	1T15-A02	-	-	-	-	-	-	-	-	-
3K15	A	P38398	-	-	-	-	-	-	-	-	-	-	-	-	7.9	2.9	87	211	16	MOLECULE: BREAST CANCER TYPE 1 SUSCEPTIBILITY PROTEIN;	-	-	-	-	-	-	-	-	-	-	-	-	-	IPR001357;IPR018957;IPR001841;IPR025994;IPR017907;IPR013083;IPR011364	Y	BRCA1	9606 [Organism: human] [Scientific Name: Homo sapiens]	Y	3	1T15-A01	-	-	-	-	-	-	-	-	-
3K15	A	P38398	-	-	-	-	-	-	-	-	-	-	-	-	7.9	2.9	87	211	16	MOLECULE: BREAST CANCER TYPE 1 SUSCEPTIBILITY PROTEIN;	-	-	-	-	-	-	-	-	-	-	-	-	-	IPR001357;IPR018957;IPR001841;IPR025994;IPR017907;IPR013083;IPR011364	Y	BRCA1	9606 [Organism: human] [Scientific Name: Homo sapiens]	Y	5	1T15-A02	-	-	-	-	-	-	-	-	-
3K15	A	P38398	-	-	-	-	-	-	-	-	-	-	-	-	7.9	2.9	87	211	16	MOLECULE: BREAST CANCER TYPE 1 SUSCEPTIBILITY PROTEIN;	-	-	-	-	-	-	-	-	-	-	-	-	-	IPR001357;IPR018957;IPR001841;IPR025994;IPR017907;IPR013083;IPR011364	Y	BRCA1	9606 [Organism: human] [Scientific Name: Homo sapiens]	Y	5	1T15-A02	-	-	-	-	-	-	-	-	-
3K15	A	P38398	-	-	-	-	-	-	-	-	-	-	-	-	7.9	2.9	87	211	16	MOLECULE: BREAST CANCER TYPE 1 SUSCEPTIBILITY PROTEIN;	-	-	-	-	-	-	-	-	-	-	-	-	-	IPR001357;IPR018957;IPR001841;IPR025994;IPR017907;IPR013083;IPR011364	Y	BRCA1	9606 [Organism: human] [Scientific Name: Homo sapiens]	Y	3	1T15-A01	-	-	-	-	-	-	-	-	-
3K15	A	P38398	-	-	-	-	-	-	-	-	-	-	-	-	7.9	2.9	87	211	16	MOLECULE: BREAST CANCER TYPE 1 SUSCEPTIBILITY PROTEIN;	-	-	-	-	-	-	-	-	-	-	-	-	-	IPR001357;IPR018957;IPR001841;IPR025994;IPR017907;IPR013083;IPR011364	Y	BRCA1	9606 [Organism: human] [Scientific Name: Homo sapiens]	Y	5	1T15-A02	-	-	-	-	-	-	-	-	-
3K15	A	P38398	-	-	-	-	-	-	-	-	-	-	-	-	7.9	2.9	87	211	16	MOLECULE: BREAST CANCER TYPE 1 SUSCEPTIBILITY PROTEIN;	-	-	-	-	-	-	-	-	-	-	-	-	-	IPR001357;IPR018957;IPR001841;IPR025994;IPR017907;IPR013083;IPR011364	Y	BRCA1	9606 [Organism: human] [Scientific Name: Homo sapiens]	Y	5	1T15-A02	-	-	-	-	-	-	-	-	-
3K15	A	P38398	-	-	-	-	-	-	-	-	-	-	-	-	7.9	2.9	87	211	16	MOLECULE: BREAST CANCER TYPE 1 SUSCEPTIBILITY PROTEIN;	-	-	-	-	-	-	-	-	-	-	-	-	-	IPR001357;IPR018957;IPR001841;IPR025994;IPR017907;IPR013083;IPR011364	Y	BRCA1	9606 [Organism: human] [Scientific Name: Homo sapiens]	Y	3	1T15-A01	-	-	-	-	-	-	-	-	-
3K15	A	P38398	-	-	-	-	-	-	-	-	-	-	-	-	7.9	2.9	87	211	16	MOLECULE: BREAST CANCER TYPE 1 SUSCEPTIBILITY PROTEIN;	-	-	-	-	-	-	-	-	-	-	-	-	-	IPR001357;IPR018957;IPR001841;IPR025994;IPR017907;IPR013083;IPR011364	Y	BRCA1	9606 [Organism: human] [Scientific Name: Homo sapiens]	Y	5	1T15-A02	-	-	-	-	-	-	-	-	-
3K15	A	P38398	-	-	-	-	-	-	-	-	-	-	-	-	7.9	2.9	87	211	16	MOLECULE: BREAST CANCER TYPE 1 SUSCEPTIBILITY PROTEIN;	-	-	-	-	-	-	-	-	-	-	-	-	-	IPR001357;IPR018957;IPR001841;IPR025994;IPR017907;IPR013083;IPR011364	Y	BRCA1	9606 [Organism: human] [Scientific Name: Homo sapiens]	Y	5	1T15-A02	-	-	-	-	-	-	-	-	-
3K15	A	P38398	-	-	-	-	-	-	-	-	-	-	-	-	7.9	2.9	87	211	16	MOLECULE: BREAST CANCER TYPE 1 SUSCEPTIBILITY PROTEIN;	-	-	-	-	-	-	-	-	-	-	-	-	-	IPR001357;IPR018957;IPR001841;IPR025994;IPR017907;IPR013083;IPR011364	Y	BRCA1	9606 [Organism: human] [Scientific Name: Homo sapiens]	Y	3	1T15-A01	-	-	-	-	-	-	-	-	-
3K15	A	P38398	-	-	-	-	-	-	-	-	-	-	-	-	7.9	2.9	87	211	16	MOLECULE: BREAST CANCER TYPE 1 SUSCEPTIBILITY PROTEIN;	-	-	-	-	-	-	-	-	-	-	-	-	-	IPR001357;IPR018957;IPR001841;IPR025994;IPR017907;IPR013083;IPR011364	Y	BRCA1	9606 [Organism: human] [Scientific Name: Homo sapiens]	Y	5	1T15-A02	-	-	-	-	-	-	-	-	-
1T2V	B	P38398	-	-	-	-	-	-	-	-	-	-	-	-	7.9	3	88	210	15	MOLECULE: BREAST CANCER TYPE 1 SUSCEPTIBILITY PROTEIN;	-	-	-	-	-	-	-	-	-	-	-	-	-	IPR001357;IPR018957;IPR001841;IPR025994;IPR017907;IPR013083;IPR011364	Y	BRCA1	9606 [Organism: human] [Scientific Name: Homo sapiens]	Y	5	1T15-A02	-	-	-	-	-	-	-	-	-
1T2V	B	P38398	-	-	-	-	-	-	-	-	-	-	-	-	7.9	3	88	210	15	MOLECULE: BREAST CANCER TYPE 1 SUSCEPTIBILITY PROTEIN;	-	-	-	-	-	-	-	-	-	-	-	-	-	IPR001357;IPR018957;IPR001841;IPR025994;IPR017907;IPR013083;IPR011364	Y	BRCA1	9606 [Organism: human] [Scientific Name: Homo sapiens]	Y	3	1T15-A01	-	-	-	-	-	-	-	-	-
1T2V	B	P38398	-	-	-	-	-	-	-	-	-	-	-	-	7.9	3	88	210	15	MOLECULE: BREAST CANCER TYPE 1 SUSCEPTIBILITY PROTEIN;	-	-	-	-	-	-	-	-	-	-	-	-	-	IPR001357;IPR018957;IPR001841;IPR025994;IPR017907;IPR013083;IPR011364	Y	BRCA1	9606 [Organism: human] [Scientific Name: Homo sapiens]	Y	5	1T15-A02	-	-	-	-	-	-	-	-	-
1T2V	B	P38398	-	-	-	-	-	-	-	-	-	-	-	-	7.9	3	88	210	15	MOLECULE: BREAST CANCER TYPE 1 SUSCEPTIBILITY PROTEIN;	-	-	-	-	-	-	-	-	-	-	-	-	-	IPR001357;IPR018957;IPR001841;IPR025994;IPR017907;IPR013083;IPR011364	Y	BRCA1	9606 [Organism: human] [Scientific Name: Homo sapiens]	Y	5	1T15-A02	-	-	-	-	-	-	-	-	-
1T2V	B	P38398	-	-	-	-	-	-	-	-	-	-	-	-	7.9	3	88	210	15	MOLECULE: BREAST CANCER TYPE 1 SUSCEPTIBILITY PROTEIN;	-	-	-	-	-	-	-	-	-	-	-	-	-	IPR001357;IPR018957;IPR001841;IPR025994;IPR017907;IPR013083;IPR011364	Y	BRCA1	9606 [Organism: human] [Scientific Name: Homo sapiens]	Y	3	1T15-A01	-	-	-	-	-	-	-	-	-
1T2V	B	P38398	-	-	-	-	-	-	-	-	-	-	-	-	7.9	3	88	210	15	MOLECULE: BREAST CANCER TYPE 1 SUSCEPTIBILITY PROTEIN;	-	-	-	-	-	-	-	-	-	-	-	-	-	IPR001357;IPR018957;IPR001841;IPR025994;IPR017907;IPR013083;IPR011364	Y	BRCA1	9606 [Organism: human] [Scientific Name: Homo sapiens]	Y	5	1T15-A02	-	-	-	-	-	-	-	-	-
1T2V	B	P38398	-	-	-	-	-	-	-	-	-	-	-	-	7.9	3	88	210	15	MOLECULE: BREAST CANCER TYPE 1 SUSCEPTIBILITY PROTEIN;	-	-	-	-	-	-	-	-	-	-	-	-	-	IPR001357;IPR018957;IPR001841;IPR025994;IPR017907;IPR013083;IPR011364	Y	BRCA1	9606 [Organism: human] [Scientific Name: Homo sapiens]	Y	5	1T15-A02	-	-	-	-	-	-	-	-	-
1T2V	B	P38398	-	-	-	-	-	-	-	-	-	-	-	-	7.9	3	88	210	15	MOLECULE: BREAST CANCER TYPE 1 SUSCEPTIBILITY PROTEIN;	-	-	-	-	-	-	-	-	-	-	-	-	-	IPR001357;IPR018957;IPR001841;IPR025994;IPR017907;IPR013083;IPR011364	Y	BRCA1	9606 [Organism: human] [Scientific Name: Homo sapiens]	Y	3	1T15-A01	-	-	-	-	-	-	-	-	-
1T2V	B	P38398	-	-	-	-	-	-	-	-	-	-	-	-	7.9	3	88	210	15	MOLECULE: BREAST CANCER TYPE 1 SUSCEPTIBILITY PROTEIN;	-	-	-	-	-	-	-	-	-	-	-	-	-	IPR001357;IPR018957;IPR001841;IPR025994;IPR017907;IPR013083;IPR011364	Y	BRCA1	9606 [Organism: human] [Scientific Name: Homo sapiens]	Y	5	1T15-A02	-	-	-	-	-	-	-	-	-
1T2V	B	P38398	-	-	-	-	-	-	-	-	-	-	-	-	7.9	3	88	210	15	MOLECULE: BREAST CANCER TYPE 1 SUSCEPTIBILITY PROTEIN;	-	-	-	-	-	-	-	-	-	-	-	-	-	IPR001357;IPR018957;IPR001841;IPR025994;IPR017907;IPR013083;IPR011364	Y	BRCA1	9606 [Organism: human] [Scientific Name: Homo sapiens]	Y	5	1T15-A02	-	-	-	-	-	-	-	-	-
1T2V	B	P38398	-	-	-	-	-	-	-	-	-	-	-	-	7.9	3	88	210	15	MOLECULE: BREAST CANCER TYPE 1 SUSCEPTIBILITY PROTEIN;	-	-	-	-	-	-	-	-	-	-	-	-	-	IPR001357;IPR018957;IPR001841;IPR025994;IPR017907;IPR013083;IPR011364	Y	BRCA1	9606 [Organism: human] [Scientific Name: Homo sapiens]	Y	3	1T15-A01	-	-	-	-	-	-	-	-	-
1T2V	B	P38398	-	-	-	-	-	-	-	-	-	-	-	-	7.9	3	88	210	15	MOLECULE: BREAST CANCER TYPE 1 SUSCEPTIBILITY PROTEIN;	-	-	-	-	-	-	-	-	-	-	-	-	-	IPR001357;IPR018957;IPR001841;IPR025994;IPR017907;IPR013083;IPR011364	Y	BRCA1	9606 [Organism: human] [Scientific Name: Homo sapiens]	Y	5	1T15-A02	-	-	-	-	-	-	-	-	-
1T2V	B	P38398	-	-	-	-	-	-	-	-	-	-	-	-	7.9	3	88	210	15	MOLECULE: BREAST CANCER TYPE 1 SUSCEPTIBILITY PROTEIN;	-	-	-	-	-	-	-	-	-	-	-	-	-	IPR001357;IPR018957;IPR001841;IPR025994;IPR017907;IPR013083;IPR011364	Y	BRCA1	9606 [Organism: human] [Scientific Name: Homo sapiens]	Y	5	1T15-A02	-	-	-	-	-	-	-	-	-
1T2V	B	P38398	-	-	-	-	-	-	-	-	-	-	-	-	7.9	3	88	210	15	MOLECULE: BREAST CANCER TYPE 1 SUSCEPTIBILITY PROTEIN;	-	-	-	-	-	-	-	-	-	-	-	-	-	IPR001357;IPR018957;IPR001841;IPR025994;IPR017907;IPR013083;IPR011364	Y	BRCA1	9606 [Organism: human] [Scientific Name: Homo sapiens]	Y	3	1T15-A01	-	-	-	-	-	-	-	-	-
1T2V	B	P38398	-	-	-	-	-	-	-	-	-	-	-	-	7.9	3	88	210	15	MOLECULE: BREAST CANCER TYPE 1 SUSCEPTIBILITY PROTEIN;	-	-	-	-	-	-	-	-	-	-	-	-	-	IPR001357;IPR018957;IPR001841;IPR025994;IPR017907;IPR013083;IPR011364	Y	BRCA1	9606 [Organism: human] [Scientific Name: Homo sapiens]	Y	5	1T15-A02	-	-	-	-	-	-	-	-	-
3PXA	A	P38398	-	-	-	-	-	-	-	-	-	-	-	-	7.9	2.9	87	207	15	MOLECULE: BREAST CANCER TYPE 1 SUSCEPTIBILITY PROTEIN;	-	-	-	-	-	-	-	-	-	-	-	-	-	IPR001357;IPR018957;IPR001841;IPR025994;IPR017907;IPR013083;IPR011364	Y	BRCA1	9606 [Organism: human] [Scientific Name: Homo sapiens]	Y	5	1T15-A02	-	-	-	-	-	-	-	-	-
3PXA	A	P38398	-	-	-	-	-	-	-	-	-	-	-	-	7.9	2.9	87	207	15	MOLECULE: BREAST CANCER TYPE 1 SUSCEPTIBILITY PROTEIN;	-	-	-	-	-	-	-	-	-	-	-	-	-	IPR001357;IPR018957;IPR001841;IPR025994;IPR017907;IPR013083;IPR011364	Y	BRCA1	9606 [Organism: human] [Scientific Name: Homo sapiens]	Y	3	1T15-A01	-	-	-	-	-	-	-	-	-
3PXA	A	P38398	-	-	-	-	-	-	-	-	-	-	-	-	7.9	2.9	87	207	15	MOLECULE: BREAST CANCER TYPE 1 SUSCEPTIBILITY PROTEIN;	-	-	-	-	-	-	-	-	-	-	-	-	-	IPR001357;IPR018957;IPR001841;IPR025994;IPR017907;IPR013083;IPR011364	Y	BRCA1	9606 [Organism: human] [Scientific Name: Homo sapiens]	Y	5	1T15-A02	-	-	-	-	-	-	-	-	-
3PXA	A	P38398	-	-	-	-	-	-	-	-	-	-	-	-	7.9	2.9	87	207	15	MOLECULE: BREAST CANCER TYPE 1 SUSCEPTIBILITY PROTEIN;	-	-	-	-	-	-	-	-	-	-	-	-	-	IPR001357;IPR018957;IPR001841;IPR025994;IPR017907;IPR013083;IPR011364	Y	BRCA1	9606 [Organism: human] [Scientific Name: Homo sapiens]	Y	5	1T15-A02	-	-	-	-	-	-	-	-	-
3PXA	A	P38398	-	-	-	-	-	-	-	-	-	-	-	-	7.9	2.9	87	207	15	MOLECULE: BREAST CANCER TYPE 1 SUSCEPTIBILITY PROTEIN;	-	-	-	-	-	-	-	-	-	-	-	-	-	IPR001357;IPR018957;IPR001841;IPR025994;IPR017907;IPR013083;IPR011364	Y	BRCA1	9606 [Organism: human] [Scientific Name: Homo sapiens]	Y	3	1T15-A01	-	-	-	-	-	-	-	-	-
3PXA	A	P38398	-	-	-	-	-	-	-	-	-	-	-	-	7.9	2.9	87	207	15	MOLECULE: BREAST CANCER TYPE 1 SUSCEPTIBILITY PROTEIN;	-	-	-	-	-	-	-	-	-	-	-	-	-	IPR001357;IPR018957;IPR001841;IPR025994;IPR017907;IPR013083;IPR011364	Y	BRCA1	9606 [Organism: human] [Scientific Name: Homo sapiens]	Y	5	1T15-A02	-	-	-	-	-	-	-	-	-
3PXA	A	P38398	-	-	-	-	-	-	-	-	-	-	-	-	7.9	2.9	87	207	15	MOLECULE: BREAST CANCER TYPE 1 SUSCEPTIBILITY PROTEIN;	-	-	-	-	-	-	-	-	-	-	-	-	-	IPR001357;IPR018957;IPR001841;IPR025994;IPR017907;IPR013083;IPR011364	Y	BRCA1	9606 [Organism: human] [Scientific Name: Homo sapiens]	Y	5	1T15-A02	-	-	-	-	-	-	-	-	-
3PXA	A	P38398	-	-	-	-	-	-	-	-	-	-	-	-	7.9	2.9	87	207	15	MOLECULE: BREAST CANCER TYPE 1 SUSCEPTIBILITY PROTEIN;	-	-	-	-	-	-	-	-	-	-	-	-	-	IPR001357;IPR018957;IPR001841;IPR025994;IPR017907;IPR013083;IPR011364	Y	BRCA1	9606 [Organism: human] [Scientific Name: Homo sapiens]	Y	3	1T15-A01	-	-	-	-	-	-	-	-	-
3PXA	A	P38398	-	-	-	-	-	-	-	-	-	-	-	-	7.9	2.9	87	207	15	MOLECULE: BREAST CANCER TYPE 1 SUSCEPTIBILITY PROTEIN;	-	-	-	-	-	-	-	-	-	-	-	-	-	IPR001357;IPR018957;IPR001841;IPR025994;IPR017907;IPR013083;IPR011364	Y	BRCA1	9606 [Organism: human] [Scientific Name: Homo sapiens]	Y	5	1T15-A02	-	-	-	-	-	-	-	-	-
3PXA	A	P38398	-	-	-	-	-	-	-	-	-	-	-	-	7.9	2.9	87	207	15	MOLECULE: BREAST CANCER TYPE 1 SUSCEPTIBILITY PROTEIN;	-	-	-	-	-	-	-	-	-	-	-	-	-	IPR001357;IPR018957;IPR001841;IPR025994;IPR017907;IPR013083;IPR011364	Y	BRCA1	9606 [Organism: human] [Scientific Name: Homo sapiens]	Y	5	1T15-A02	-	-	-	-	-	-	-	-	-
3PXA	A	P38398	-	-	-	-	-	-	-	-	-	-	-	-	7.9	2.9	87	207	15	MOLECULE: BREAST CANCER TYPE 1 SUSCEPTIBILITY PROTEIN;	-	-	-	-	-	-	-	-	-	-	-	-	-	IPR001357;IPR018957;IPR001841;IPR025994;IPR017907;IPR013083;IPR011364	Y	BRCA1	9606 [Organism: human] [Scientific Name: Homo sapiens]	Y	3	1T15-A01	-	-	-	-	-	-	-	-	-
3PXA	A	P38398	-	-	-	-	-	-	-	-	-	-	-	-	7.9	2.9	87	207	15	MOLECULE: BREAST CANCER TYPE 1 SUSCEPTIBILITY PROTEIN;	-	-	-	-	-	-	-	-	-	-	-	-	-	IPR001357;IPR018957;IPR001841;IPR025994;IPR017907;IPR013083;IPR011364	Y	BRCA1	9606 [Organism: human] [Scientific Name: Homo sapiens]	Y	5	1T15-A02	-	-	-	-	-	-	-	-	-
3PXA	A	P38398	-	-	-	-	-	-	-	-	-	-	-	-	7.9	2.9	87	207	15	MOLECULE: BREAST CANCER TYPE 1 SUSCEPTIBILITY PROTEIN;	-	-	-	-	-	-	-	-	-	-	-	-	-	IPR001357;IPR018957;IPR001841;IPR025994;IPR017907;IPR013083;IPR011364	Y	BRCA1	9606 [Organism: human] [Scientific Name: Homo sapiens]	Y	5	1T15-A02	-	-	-	-	-	-	-	-	-
3PXA	A	P38398	-	-	-	-	-	-	-	-	-	-	-	-	7.9	2.9	87	207	15	MOLECULE: BREAST CANCER TYPE 1 SUSCEPTIBILITY PROTEIN;	-	-	-	-	-	-	-	-	-	-	-	-	-	IPR001357;IPR018957;IPR001841;IPR025994;IPR017907;IPR013083;IPR011364	Y	BRCA1	9606 [Organism: human] [Scientific Name: Homo sapiens]	Y	3	1T15-A01	-	-	-	-	-	-	-	-	-
3PXA	A	P38398	-	-	-	-	-	-	-	-	-	-	-	-	7.9	2.9	87	207	15	MOLECULE: BREAST CANCER TYPE 1 SUSCEPTIBILITY PROTEIN;	-	-	-	-	-	-	-	-	-	-	-	-	-	IPR001357;IPR018957;IPR001841;IPR025994;IPR017907;IPR013083;IPR011364	Y	BRCA1	9606 [Organism: human] [Scientific Name: Homo sapiens]	Y	5	1T15-A02	-	-	-	-	-	-	-	-	-
3COJ	B	P38398	-	-	-	-	-	-	-	-	-	-	-	-	7.8	3	86	208	17	MOLECULE: BREAST CANCER TYPE 1 SUSCEPTIBILITY PROTEIN;	-	-	-	-	-	-	-	-	-	-	-	-	-	IPR001357;IPR018957;IPR001841;IPR025994;IPR017907;IPR013083;IPR011364	Y	BRCA1	9606 [Organism: human] [Scientific Name: Homo sapiens]	Y	5	1T15-A02	-	-	-	-	-	-	-	-	-
3COJ	B	P38398	-	-	-	-	-	-	-	-	-	-	-	-	7.8	3	86	208	17	MOLECULE: BREAST CANCER TYPE 1 SUSCEPTIBILITY PROTEIN;	-	-	-	-	-	-	-	-	-	-	-	-	-	IPR001357;IPR018957;IPR001841;IPR025994;IPR017907;IPR013083;IPR011364	Y	BRCA1	9606 [Organism: human] [Scientific Name: Homo sapiens]	Y	3	1T15-A01	-	-	-	-	-	-	-	-	-
3COJ	B	P38398	-	-	-	-	-	-	-	-	-	-	-	-	7.8	3	86	208	17	MOLECULE: BREAST CANCER TYPE 1 SUSCEPTIBILITY PROTEIN;	-	-	-	-	-	-	-	-	-	-	-	-	-	IPR001357;IPR018957;IPR001841;IPR025994;IPR017907;IPR013083;IPR011364	Y	BRCA1	9606 [Organism: human] [Scientific Name: Homo sapiens]	Y	5	1T15-A02	-	-	-	-	-	-	-	-	-
3COJ	B	P38398	-	-	-	-	-	-	-	-	-	-	-	-	7.8	3	86	208	17	MOLECULE: BREAST CANCER TYPE 1 SUSCEPTIBILITY PROTEIN;	-	-	-	-	-	-	-	-	-	-	-	-	-	IPR001357;IPR018957;IPR001841;IPR025994;IPR017907;IPR013083;IPR011364	Y	BRCA1	9606 [Organism: human] [Scientific Name: Homo sapiens]	Y	5	1T15-A02	-	-	-	-	-	-	-	-	-
3COJ	B	P38398	-	-	-	-	-	-	-	-	-	-	-	-	7.8	3	86	208	17	MOLECULE: BREAST CANCER TYPE 1 SUSCEPTIBILITY PROTEIN;	-	-	-	-	-	-	-	-	-	-	-	-	-	IPR001357;IPR018957;IPR001841;IPR025994;IPR017907;IPR013083;IPR011364	Y	BRCA1	9606 [Organism: human] [Scientific Name: Homo sapiens]	Y	3	1T15-A01	-	-	-	-	-	-	-	-	-
3COJ	B	P38398	-	-	-	-	-	-	-	-	-	-	-	-	7.8	3	86	208	17	MOLECULE: BREAST CANCER TYPE 1 SUSCEPTIBILITY PROTEIN;	-	-	-	-	-	-	-	-	-	-	-	-	-	IPR001357;IPR018957;IPR001841;IPR025994;IPR017907;IPR013083;IPR011364	Y	BRCA1	9606 [Organism: human] [Scientific Name: Homo sapiens]	Y	5	1T15-A02	-	-	-	-	-	-	-	-	-
3COJ	B	P38398	-	-	-	-	-	-	-	-	-	-	-	-	7.8	3	86	208	17	MOLECULE: BREAST CANCER TYPE 1 SUSCEPTIBILITY PROTEIN;	-	-	-	-	-	-	-	-	-	-	-	-	-	IPR001357;IPR018957;IPR001841;IPR025994;IPR017907;IPR013083;IPR011364	Y	BRCA1	9606 [Organism: human] [Scientific Name: Homo sapiens]	Y	5	1T15-A02	-	-	-	-	-	-	-	-	-
3COJ	B	P38398	-	-	-	-	-	-	-	-	-	-	-	-	7.8	3	86	208	17	MOLECULE: BREAST CANCER TYPE 1 SUSCEPTIBILITY PROTEIN;	-	-	-	-	-	-	-	-	-	-	-	-	-	IPR001357;IPR018957;IPR001841;IPR025994;IPR017907;IPR013083;IPR011364	Y	BRCA1	9606 [Organism: human] [Scientific Name: Homo sapiens]	Y	3	1T15-A01	-	-	-	-	-	-	-	-	-
3COJ	B	P38398	-	-	-	-	-	-	-	-	-	-	-	-	7.8	3	86	208	17	MOLECULE: BREAST CANCER TYPE 1 SUSCEPTIBILITY PROTEIN;	-	-	-	-	-	-	-	-	-	-	-	-	-	IPR001357;IPR018957;IPR001841;IPR025994;IPR017907;IPR013083;IPR011364	Y	BRCA1	9606 [Organism: human] [Scientific Name: Homo sapiens]	Y	5	1T15-A02	-	-	-	-	-	-	-	-	-
3COJ	B	P38398	-	-	-	-	-	-	-	-	-	-	-	-	7.8	3	86	208	17	MOLECULE: BREAST CANCER TYPE 1 SUSCEPTIBILITY PROTEIN;	-	-	-	-	-	-	-	-	-	-	-	-	-	IPR001357;IPR018957;IPR001841;IPR025994;IPR017907;IPR013083;IPR011364	Y	BRCA1	9606 [Organism: human] [Scientific Name: Homo sapiens]	Y	5	1T15-A02	-	-	-	-	-	-	-	-	-
3COJ	B	P38398	-	-	-	-	-	-	-	-	-	-	-	-	7.8	3	86	208	17	MOLECULE: BREAST CANCER TYPE 1 SUSCEPTIBILITY PROTEIN;	-	-	-	-	-	-	-	-	-	-	-	-	-	IPR001357;IPR018957;IPR001841;IPR025994;IPR017907;IPR013083;IPR011364	Y	BRCA1	9606 [Organism: human] [Scientific Name: Homo sapiens]	Y	3	1T15-A01	-	-	-	-	-	-	-	-	-
3COJ	B	P38398	-	-	-	-	-	-	-	-	-	-	-	-	7.8	3	86	208	17	MOLECULE: BREAST CANCER TYPE 1 SUSCEPTIBILITY PROTEIN;	-	-	-	-	-	-	-	-	-	-	-	-	-	IPR001357;IPR018957;IPR001841;IPR025994;IPR017907;IPR013083;IPR011364	Y	BRCA1	9606 [Organism: human] [Scientific Name: Homo sapiens]	Y	5	1T15-A02	-	-	-	-	-	-	-	-	-
3COJ	B	P38398	-	-	-	-	-	-	-	-	-	-	-	-	7.8	3	86	208	17	MOLECULE: BREAST CANCER TYPE 1 SUSCEPTIBILITY PROTEIN;	-	-	-	-	-	-	-	-	-	-	-	-	-	IPR001357;IPR018957;IPR001841;IPR025994;IPR017907;IPR013083;IPR011364	Y	BRCA1	9606 [Organism: human] [Scientific Name: Homo sapiens]	Y	5	1T15-A02	-	-	-	-	-	-	-	-	-
3COJ	B	P38398	-	-	-	-	-	-	-	-	-	-	-	-	7.8	3	86	208	17	MOLECULE: BREAST CANCER TYPE 1 SUSCEPTIBILITY PROTEIN;	-	-	-	-	-	-	-	-	-	-	-	-	-	IPR001357;IPR018957;IPR001841;IPR025994;IPR017907;IPR013083;IPR011364	Y	BRCA1	9606 [Organism: human] [Scientific Name: Homo sapiens]	Y	3	1T15-A01	-	-	-	-	-	-	-	-	-
3COJ	B	P38398	-	-	-	-	-	-	-	-	-	-	-	-	7.8	3	86	208	17	MOLECULE: BREAST CANCER TYPE 1 SUSCEPTIBILITY PROTEIN;	-	-	-	-	-	-	-	-	-	-	-	-	-	IPR001357;IPR018957;IPR001841;IPR025994;IPR017907;IPR013083;IPR011364	Y	BRCA1	9606 [Organism: human] [Scientific Name: Homo sapiens]	Y	5	1T15-A02	-	-	-	-	-	-	-	-	-
4IGK	B	P38398	-	-	-	-	-	-	-	-	-	-	-	-	7.8	3.1	91	211	14	MOLECULE: BREAST CANCER TYPE 1 SUSCEPTIBILITY PROTEIN;	-	-	-	-	-	-	-	-	-	-	-	-	-	IPR001357;IPR018957;IPR001841;IPR025994;IPR017907;IPR013083;IPR011364	Y	BRCA1	9606 [Organism: human] [Scientific Name: Homo sapiens]	Y	5	1T15-A02	-	-	-	-	-	-	-	-	-
4IGK	B	P38398	-	-	-	-	-	-	-	-	-	-	-	-	7.8	3.1	91	211	14	MOLECULE: BREAST CANCER TYPE 1 SUSCEPTIBILITY PROTEIN;	-	-	-	-	-	-	-	-	-	-	-	-	-	IPR001357;IPR018957;IPR001841;IPR025994;IPR017907;IPR013083;IPR011364	Y	BRCA1	9606 [Organism: human] [Scientific Name: Homo sapiens]	Y	3	1T15-A01	-	-	-	-	-	-	-	-	-
4IGK	B	P38398	-	-	-	-	-	-	-	-	-	-	-	-	7.8	3.1	91	211	14	MOLECULE: BREAST CANCER TYPE 1 SUSCEPTIBILITY PROTEIN;	-	-	-	-	-	-	-	-	-	-	-	-	-	IPR001357;IPR018957;IPR001841;IPR025994;IPR017907;IPR013083;IPR011364	Y	BRCA1	9606 [Organism: human] [Scientific Name: Homo sapiens]	Y	5	1T15-A02	-	-	-	-	-	-	-	-	-
4IGK	B	P38398	-	-	-	-	-	-	-	-	-	-	-	-	7.8	3.1	91	211	14	MOLECULE: BREAST CANCER TYPE 1 SUSCEPTIBILITY PROTEIN;	-	-	-	-	-	-	-	-	-	-	-	-	-	IPR001357;IPR018957;IPR001841;IPR025994;IPR017907;IPR013083;IPR011364	Y	BRCA1	9606 [Organism: human] [Scientific Name: Homo sapiens]	Y	5	1T15-A02	-	-	-	-	-	-	-	-	-
4IGK	B	P38398	-	-	-	-	-	-	-	-	-	-	-	-	7.8	3.1	91	211	14	MOLECULE: BREAST CANCER TYPE 1 SUSCEPTIBILITY PROTEIN;	-	-	-	-	-	-	-	-	-	-	-	-	-	IPR001357;IPR018957;IPR001841;IPR025994;IPR017907;IPR013083;IPR011364	Y	BRCA1	9606 [Organism: human] [Scientific Name: Homo sapiens]	Y	3	1T15-A01	-	-	-	-	-	-	-	-	-
4IGK	B	P38398	-	-	-	-	-	-	-	-	-	-	-	-	7.8	3.1	91	211	14	MOLECULE: BREAST CANCER TYPE 1 SUSCEPTIBILITY PROTEIN;	-	-	-	-	-	-	-	-	-	-	-	-	-	IPR001357;IPR018957;IPR001841;IPR025994;IPR017907;IPR013083;IPR011364	Y	BRCA1	9606 [Organism: human] [Scientific Name: Homo sapiens]	Y	5	1T15-A02	-	-	-	-	-	-	-	-	-
4IGK	B	P38398	-	-	-	-	-	-	-	-	-	-	-	-	7.8	3.1	91	211	14	MOLECULE: BREAST CANCER TYPE 1 SUSCEPTIBILITY PROTEIN;	-	-	-	-	-	-	-	-	-	-	-	-	-	IPR001357;IPR018957;IPR001841;IPR025994;IPR017907;IPR013083;IPR011364	Y	BRCA1	9606 [Organism: human] [Scientific Name: Homo sapiens]	Y	5	1T15-A02	-	-	-	-	-	-	-	-	-
4IGK	B	P38398	-	-	-	-	-	-	-	-	-	-	-	-	7.8	3.1	91	211	14	MOLECULE: BREAST CANCER TYPE 1 SUSCEPTIBILITY PROTEIN;	-	-	-	-	-	-	-	-	-	-	-	-	-	IPR001357;IPR018957;IPR001841;IPR025994;IPR017907;IPR013083;IPR011364	Y	BRCA1	9606 [Organism: human] [Scientific Name: Homo sapiens]	Y	3	1T15-A01	-	-	-	-	-	-	-	-	-
4IGK	B	P38398	-	-	-	-	-	-	-	-	-	-	-	-	7.8	3.1	91	211	14	MOLECULE: BREAST CANCER TYPE 1 SUSCEPTIBILITY PROTEIN;	-	-	-	-	-	-	-	-	-	-	-	-	-	IPR001357;IPR018957;IPR001841;IPR025994;IPR017907;IPR013083;IPR011364	Y	BRCA1	9606 [Organism: human] [Scientific Name: Homo sapiens]	Y	5	1T15-A02	-	-	-	-	-	-	-	-	-
4IGK	B	P38398	-	-	-	-	-	-	-	-	-	-	-	-	7.8	3.1	91	211	14	MOLECULE: BREAST CANCER TYPE 1 SUSCEPTIBILITY PROTEIN;	-	-	-	-	-	-	-	-	-	-	-	-	-	IPR001357;IPR018957;IPR001841;IPR025994;IPR017907;IPR013083;IPR011364	Y	BRCA1	9606 [Organism: human] [Scientific Name: Homo sapiens]	Y	5	1T15-A02	-	-	-	-	-	-	-	-	-
4IGK	B	P38398	-	-	-	-	-	-	-	-	-	-	-	-	7.8	3.1	91	211	14	MOLECULE: BREAST CANCER TYPE 1 SUSCEPTIBILITY PROTEIN;	-	-	-	-	-	-	-	-	-	-	-	-	-	IPR001357;IPR018957;IPR001841;IPR025994;IPR017907;IPR013083;IPR011364	Y	BRCA1	9606 [Organism: human] [Scientific Name: Homo sapiens]	Y	3	1T15-A01	-	-	-	-	-	-	-	-	-
4IGK	B	P38398	-	-	-	-	-	-	-	-	-	-	-	-	7.8	3.1	91	211	14	MOLECULE: BREAST CANCER TYPE 1 SUSCEPTIBILITY PROTEIN;	-	-	-	-	-	-	-	-	-	-	-	-	-	IPR001357;IPR018957;IPR001841;IPR025994;IPR017907;IPR013083;IPR011364	Y	BRCA1	9606 [Organism: human] [Scientific Name: Homo sapiens]	Y	5	1T15-A02	-	-	-	-	-	-	-	-	-
4IGK	B	P38398	-	-	-	-	-	-	-	-	-	-	-	-	7.8	3.1	91	211	14	MOLECULE: BREAST CANCER TYPE 1 SUSCEPTIBILITY PROTEIN;	-	-	-	-	-	-	-	-	-	-	-	-	-	IPR001357;IPR018957;IPR001841;IPR025994;IPR017907;IPR013083;IPR011364	Y	BRCA1	9606 [Organism: human] [Scientific Name: Homo sapiens]	Y	5	1T15-A02	-	-	-	-	-	-	-	-	-
4IGK	B	P38398	-	-	-	-	-	-	-	-	-	-	-	-	7.8	3.1	91	211	14	MOLECULE: BREAST CANCER TYPE 1 SUSCEPTIBILITY PROTEIN;	-	-	-	-	-	-	-	-	-	-	-	-	-	IPR001357;IPR018957;IPR001841;IPR025994;IPR017907;IPR013083;IPR011364	Y	BRCA1	9606 [Organism: human] [Scientific Name: Homo sapiens]	Y	3	1T15-A01	-	-	-	-	-	-	-	-	-
4IGK	B	P38398	-	-	-	-	-	-	-	-	-	-	-	-	7.8	3.1	91	211	14	MOLECULE: BREAST CANCER TYPE 1 SUSCEPTIBILITY PROTEIN;	-	-	-	-	-	-	-	-	-	-	-	-	-	IPR001357;IPR018957;IPR001841;IPR025994;IPR017907;IPR013083;IPR011364	Y	BRCA1	9606 [Organism: human] [Scientific Name: Homo sapiens]	Y	5	1T15-A02	-	-	-	-	-	-	-	-	-
3PXE	A	P38398	-	-	-	-	-	-	-	-	-	-	-	-	7.8	3.2	89	211	15	MOLECULE: BREAST CANCER TYPE 1 SUSCEPTIBILITY PROTEIN;	-	-	-	-	-	-	-	-	-	-	-	-	-	IPR001357;IPR018957;IPR001841;IPR025994;IPR017907;IPR013083;IPR011364	Y	BRCA1	9606 [Organism: human] [Scientific Name: Homo sapiens]	Y	5	1T15-A02	-	-	-	-	-	-	-	-	-
3PXE	A	P38398	-	-	-	-	-	-	-	-	-	-	-	-	7.8	3.2	89	211	15	MOLECULE: BREAST CANCER TYPE 1 SUSCEPTIBILITY PROTEIN;	-	-	-	-	-	-	-	-	-	-	-	-	-	IPR001357;IPR018957;IPR001841;IPR025994;IPR017907;IPR013083;IPR011364	Y	BRCA1	9606 [Organism: human] [Scientific Name: Homo sapiens]	Y	3	1T15-A01	-	-	-	-	-	-	-	-	-
3PXE	A	P38398	-	-	-	-	-	-	-	-	-	-	-	-	7.8	3.2	89	211	15	MOLECULE: BREAST CANCER TYPE 1 SUSCEPTIBILITY PROTEIN;	-	-	-	-	-	-	-	-	-	-	-	-	-	IPR001357;IPR018957;IPR001841;IPR025994;IPR017907;IPR013083;IPR011364	Y	BRCA1	9606 [Organism: human] [Scientific Name: Homo sapiens]	Y	5	1T15-A02	-	-	-	-	-	-	-	-	-
3PXE	A	P38398	-	-	-	-	-	-	-	-	-	-	-	-	7.8	3.2	89	211	15	MOLECULE: BREAST CANCER TYPE 1 SUSCEPTIBILITY PROTEIN;	-	-	-	-	-	-	-	-	-	-	-	-	-	IPR001357;IPR018957;IPR001841;IPR025994;IPR017907;IPR013083;IPR011364	Y	BRCA1	9606 [Organism: human] [Scientific Name: Homo sapiens]	Y	5	1T15-A02	-	-	-	-	-	-	-	-	-
3PXE	A	P38398	-	-	-	-	-	-	-	-	-	-	-	-	7.8	3.2	89	211	15	MOLECULE: BREAST CANCER TYPE 1 SUSCEPTIBILITY PROTEIN;	-	-	-	-	-	-	-	-	-	-	-	-	-	IPR001357;IPR018957;IPR001841;IPR025994;IPR017907;IPR013083;IPR011364	Y	BRCA1	9606 [Organism: human] [Scientific Name: Homo sapiens]	Y	3	1T15-A01	-	-	-	-	-	-	-	-	-
3PXE	A	P38398	-	-	-	-	-	-	-	-	-	-	-	-	7.8	3.2	89	211	15	MOLECULE: BREAST CANCER TYPE 1 SUSCEPTIBILITY PROTEIN;	-	-	-	-	-	-	-	-	-	-	-	-	-	IPR001357;IPR018957;IPR001841;IPR025994;IPR017907;IPR013083;IPR011364	Y	BRCA1	9606 [Organism: human] [Scientific Name: Homo sapiens]	Y	5	1T15-A02	-	-	-	-	-	-	-	-	-
3PXE	A	P38398	-	-	-	-	-	-	-	-	-	-	-	-	7.8	3.2	89	211	15	MOLECULE: BREAST CANCER TYPE 1 SUSCEPTIBILITY PROTEIN;	-	-	-	-	-	-	-	-	-	-	-	-	-	IPR001357;IPR018957;IPR001841;IPR025994;IPR017907;IPR013083;IPR011364	Y	BRCA1	9606 [Organism: human] [Scientific Name: Homo sapiens]	Y	5	1T15-A02	-	-	-	-	-	-	-	-	-
3PXE	A	P38398	-	-	-	-	-	-	-	-	-	-	-	-	7.8	3.2	89	211	15	MOLECULE: BREAST CANCER TYPE 1 SUSCEPTIBILITY PROTEIN;	-	-	-	-	-	-	-	-	-	-	-	-	-	IPR001357;IPR018957;IPR001841;IPR025994;IPR017907;IPR013083;IPR011364	Y	BRCA1	9606 [Organism: human] [Scientific Name: Homo sapiens]	Y	3	1T15-A01	-	-	-	-	-	-	-	-	-
3PXE	A	P38398	-	-	-	-	-	-	-	-	-	-	-	-	7.8	3.2	89	211	15	MOLECULE: BREAST CANCER TYPE 1 SUSCEPTIBILITY PROTEIN;	-	-	-	-	-	-	-	-	-	-	-	-	-	IPR001357;IPR018957;IPR001841;IPR025994;IPR017907;IPR013083;IPR011364	Y	BRCA1	9606 [Organism: human] [Scientific Name: Homo sapiens]	Y	5	1T15-A02	-	-	-	-	-	-	-	-	-
3PXE	A	P38398	-	-	-	-	-	-	-	-	-	-	-	-	7.8	3.2	89	211	15	MOLECULE: BREAST CANCER TYPE 1 SUSCEPTIBILITY PROTEIN;	-	-	-	-	-	-	-	-	-	-	-	-	-	IPR001357;IPR018957;IPR001841;IPR025994;IPR017907;IPR013083;IPR011364	Y	BRCA1	9606 [Organism: human] [Scientific Name: Homo sapiens]	Y	5	1T15-A02	-	-	-	-	-	-	-	-	-
3PXE	A	P38398	-	-	-	-	-	-	-	-	-	-	-	-	7.8	3.2	89	211	15	MOLECULE: BREAST CANCER TYPE 1 SUSCEPTIBILITY PROTEIN;	-	-	-	-	-	-	-	-	-	-	-	-	-	IPR001357;IPR018957;IPR001841;IPR025994;IPR017907;IPR013083;IPR011364	Y	BRCA1	9606 [Organism: human] [Scientific Name: Homo sapiens]	Y	3	1T15-A01	-	-	-	-	-	-	-	-	-
3PXE	A	P38398	-	-	-	-	-	-	-	-	-	-	-	-	7.8	3.2	89	211	15	MOLECULE: BREAST CANCER TYPE 1 SUSCEPTIBILITY PROTEIN;	-	-	-	-	-	-	-	-	-	-	-	-	-	IPR001357;IPR018957;IPR001841;IPR025994;IPR017907;IPR013083;IPR011364	Y	BRCA1	9606 [Organism: human] [Scientific Name: Homo sapiens]	Y	5	1T15-A02	-	-	-	-	-	-	-	-	-
3PXE	A	P38398	-	-	-	-	-	-	-	-	-	-	-	-	7.8	3.2	89	211	15	MOLECULE: BREAST CANCER TYPE 1 SUSCEPTIBILITY PROTEIN;	-	-	-	-	-	-	-	-	-	-	-	-	-	IPR001357;IPR018957;IPR001841;IPR025994;IPR017907;IPR013083;IPR011364	Y	BRCA1	9606 [Organism: human] [Scientific Name: Homo sapiens]	Y	5	1T15-A02	-	-	-	-	-	-	-	-	-
3PXE	A	P38398	-	-	-	-	-	-	-	-	-	-	-	-	7.8	3.2	89	211	15	MOLECULE: BREAST CANCER TYPE 1 SUSCEPTIBILITY PROTEIN;	-	-	-	-	-	-	-	-	-	-	-	-	-	IPR001357;IPR018957;IPR001841;IPR025994;IPR017907;IPR013083;IPR011364	Y	BRCA1	9606 [Organism: human] [Scientific Name: Homo sapiens]	Y	3	1T15-A01	-	-	-	-	-	-	-	-	-
3PXE	A	P38398	-	-	-	-	-	-	-	-	-	-	-	-	7.8	3.2	89	211	15	MOLECULE: BREAST CANCER TYPE 1 SUSCEPTIBILITY PROTEIN;	-	-	-	-	-	-	-	-	-	-	-	-	-	IPR001357;IPR018957;IPR001841;IPR025994;IPR017907;IPR013083;IPR011364	Y	BRCA1	9606 [Organism: human] [Scientific Name: Homo sapiens]	Y	5	1T15-A02	-	-	-	-	-	-	-	-	-
3COJ	A	P38398	-	-	-	-	-	-	-	-	-	-	-	-	7.8	3	89	208	17	MOLECULE: BREAST CANCER TYPE 1 SUSCEPTIBILITY PROTEIN;	-	-	-	-	-	-	-	-	-	-	-	-	-	IPR001357;IPR018957;IPR001841;IPR025994;IPR017907;IPR013083;IPR011364	Y	BRCA1	9606 [Organism: human] [Scientific Name: Homo sapiens]	Y	5	1T15-A02	-	-	-	-	-	-	-	-	-
3COJ	A	P38398	-	-	-	-	-	-	-	-	-	-	-	-	7.8	3	89	208	17	MOLECULE: BREAST CANCER TYPE 1 SUSCEPTIBILITY PROTEIN;	-	-	-	-	-	-	-	-	-	-	-	-	-	IPR001357;IPR018957;IPR001841;IPR025994;IPR017907;IPR013083;IPR011364	Y	BRCA1	9606 [Organism: human] [Scientific Name: Homo sapiens]	Y	3	1T15-A01	-	-	-	-	-	-	-	-	-
3COJ	A	P38398	-	-	-	-	-	-	-	-	-	-	-	-	7.8	3	89	208	17	MOLECULE: BREAST CANCER TYPE 1 SUSCEPTIBILITY PROTEIN;	-	-	-	-	-	-	-	-	-	-	-	-	-	IPR001357;IPR018957;IPR001841;IPR025994;IPR017907;IPR013083;IPR011364	Y	BRCA1	9606 [Organism: human] [Scientific Name: Homo sapiens]	Y	5	1T15-A02	-	-	-	-	-	-	-	-	-
3COJ	A	P38398	-	-	-	-	-	-	-	-	-	-	-	-	7.8	3	89	208	17	MOLECULE: BREAST CANCER TYPE 1 SUSCEPTIBILITY PROTEIN;	-	-	-	-	-	-	-	-	-	-	-	-	-	IPR001357;IPR018957;IPR001841;IPR025994;IPR017907;IPR013083;IPR011364	Y	BRCA1	9606 [Organism: human] [Scientific Name: Homo sapiens]	Y	5	1T15-A02	-	-	-	-	-	-	-	-	-
3COJ	A	P38398	-	-	-	-	-	-	-	-	-	-	-	-	7.8	3	89	208	17	MOLECULE: BREAST CANCER TYPE 1 SUSCEPTIBILITY PROTEIN;	-	-	-	-	-	-	-	-	-	-	-	-	-	IPR001357;IPR018957;IPR001841;IPR025994;IPR017907;IPR013083;IPR011364	Y	BRCA1	9606 [Organism: human] [Scientific Name: Homo sapiens]	Y	3	1T15-A01	-	-	-	-	-	-	-	-	-
3COJ	A	P38398	-	-	-	-	-	-	-	-	-	-	-	-	7.8	3	89	208	17	MOLECULE: BREAST CANCER TYPE 1 SUSCEPTIBILITY PROTEIN;	-	-	-	-	-	-	-	-	-	-	-	-	-	IPR001357;IPR018957;IPR001841;IPR025994;IPR017907;IPR013083;IPR011364	Y	BRCA1	9606 [Organism: human] [Scientific Name: Homo sapiens]	Y	5	1T15-A02	-	-	-	-	-	-	-	-	-
3COJ	A	P38398	-	-	-	-	-	-	-	-	-	-	-	-	7.8	3	89	208	17	MOLECULE: BREAST CANCER TYPE 1 SUSCEPTIBILITY PROTEIN;	-	-	-	-	-	-	-	-	-	-	-	-	-	IPR001357;IPR018957;IPR001841;IPR025994;IPR017907;IPR013083;IPR011364	Y	BRCA1	9606 [Organism: human] [Scientific Name: Homo sapiens]	Y	5	1T15-A02	-	-	-	-	-	-	-	-	-
3COJ	A	P38398	-	-	-	-	-	-	-	-	-	-	-	-	7.8	3	89	208	17	MOLECULE: BREAST CANCER TYPE 1 SUSCEPTIBILITY PROTEIN;	-	-	-	-	-	-	-	-	-	-	-	-	-	IPR001357;IPR018957;IPR001841;IPR025994;IPR017907;IPR013083;IPR011364	Y	BRCA1	9606 [Organism: human] [Scientific Name: Homo sapiens]	Y	3	1T15-A01	-	-	-	-	-	-	-	-	-
3COJ	A	P38398	-	-	-	-	-	-	-	-	-	-	-	-	7.8	3	89	208	17	MOLECULE: BREAST CANCER TYPE 1 SUSCEPTIBILITY PROTEIN;	-	-	-	-	-	-	-	-	-	-	-	-	-	IPR001357;IPR018957;IPR001841;IPR025994;IPR017907;IPR013083;IPR011364	Y	BRCA1	9606 [Organism: human] [Scientific Name: Homo sapiens]	Y	5	1T15-A02	-	-	-	-	-	-	-	-	-
3COJ	A	P38398	-	-	-	-	-	-	-	-	-	-	-	-	7.8	3	89	208	17	MOLECULE: BREAST CANCER TYPE 1 SUSCEPTIBILITY PROTEIN;	-	-	-	-	-	-	-	-	-	-	-	-	-	IPR001357;IPR018957;IPR001841;IPR025994;IPR017907;IPR013083;IPR011364	Y	BRCA1	9606 [Organism: human] [Scientific Name: Homo sapiens]	Y	5	1T15-A02	-	-	-	-	-	-	-	-	-
3COJ	A	P38398	-	-	-	-	-	-	-	-	-	-	-	-	7.8	3	89	208	17	MOLECULE: BREAST CANCER TYPE 1 SUSCEPTIBILITY PROTEIN;	-	-	-	-	-	-	-	-	-	-	-	-	-	IPR001357;IPR018957;IPR001841;IPR025994;IPR017907;IPR013083;IPR011364	Y	BRCA1	9606 [Organism: human] [Scientific Name: Homo sapiens]	Y	3	1T15-A01	-	-	-	-	-	-	-	-	-
3COJ	A	P38398	-	-	-	-	-	-	-	-	-	-	-	-	7.8	3	89	208	17	MOLECULE: BREAST CANCER TYPE 1 SUSCEPTIBILITY PROTEIN;	-	-	-	-	-	-	-	-	-	-	-	-	-	IPR001357;IPR018957;IPR001841;IPR025994;IPR017907;IPR013083;IPR011364	Y	BRCA1	9606 [Organism: human] [Scientific Name: Homo sapiens]	Y	5	1T15-A02	-	-	-	-	-	-	-	-	-
3COJ	A	P38398	-	-	-	-	-	-	-	-	-	-	-	-	7.8	3	89	208	17	MOLECULE: BREAST CANCER TYPE 1 SUSCEPTIBILITY PROTEIN;	-	-	-	-	-	-	-	-	-	-	-	-	-	IPR001357;IPR018957;IPR001841;IPR025994;IPR017907;IPR013083;IPR011364	Y	BRCA1	9606 [Organism: human] [Scientific Name: Homo sapiens]	Y	5	1T15-A02	-	-	-	-	-	-	-	-	-
3COJ	A	P38398	-	-	-	-	-	-	-	-	-	-	-	-	7.8	3	89	208	17	MOLECULE: BREAST CANCER TYPE 1 SUSCEPTIBILITY PROTEIN;	-	-	-	-	-	-	-	-	-	-	-	-	-	IPR001357;IPR018957;IPR001841;IPR025994;IPR017907;IPR013083;IPR011364	Y	BRCA1	9606 [Organism: human] [Scientific Name: Homo sapiens]	Y	3	1T15-A01	-	-	-	-	-	-	-	-	-
3COJ	A	P38398	-	-	-	-	-	-	-	-	-	-	-	-	7.8	3	89	208	17	MOLECULE: BREAST CANCER TYPE 1 SUSCEPTIBILITY PROTEIN;	-	-	-	-	-	-	-	-	-	-	-	-	-	IPR001357;IPR018957;IPR001841;IPR025994;IPR017907;IPR013083;IPR011364	Y	BRCA1	9606 [Organism: human] [Scientific Name: Homo sapiens]	Y	5	1T15-A02	-	-	-	-	-	-	-	-	-
3COJ	F	P38398	-	-	-	-	-	-	-	-	-	-	-	-	7.8	3.1	90	207	14	MOLECULE: BREAST CANCER TYPE 1 SUSCEPTIBILITY PROTEIN;	-	-	-	-	-	-	-	-	-	-	-	-	-	IPR001357;IPR018957;IPR001841;IPR025994;IPR017907;IPR013083;IPR011364	Y	BRCA1	9606 [Organism: human] [Scientific Name: Homo sapiens]	Y	5	1T15-A02	-	-	-	-	-	-	-	-	-
3COJ	F	P38398	-	-	-	-	-	-	-	-	-	-	-	-	7.8	3.1	90	207	14	MOLECULE: BREAST CANCER TYPE 1 SUSCEPTIBILITY PROTEIN;	-	-	-	-	-	-	-	-	-	-	-	-	-	IPR001357;IPR018957;IPR001841;IPR025994;IPR017907;IPR013083;IPR011364	Y	BRCA1	9606 [Organism: human] [Scientific Name: Homo sapiens]	Y	3	1T15-A01	-	-	-	-	-	-	-	-	-
3COJ	F	P38398	-	-	-	-	-	-	-	-	-	-	-	-	7.8	3.1	90	207	14	MOLECULE: BREAST CANCER TYPE 1 SUSCEPTIBILITY PROTEIN;	-	-	-	-	-	-	-	-	-	-	-	-	-	IPR001357;IPR018957;IPR001841;IPR025994;IPR017907;IPR013083;IPR011364	Y	BRCA1	9606 [Organism: human] [Scientific Name: Homo sapiens]	Y	5	1T15-A02	-	-	-	-	-	-	-	-	-
3COJ	F	P38398	-	-	-	-	-	-	-	-	-	-	-	-	7.8	3.1	90	207	14	MOLECULE: BREAST CANCER TYPE 1 SUSCEPTIBILITY PROTEIN;	-	-	-	-	-	-	-	-	-	-	-	-	-	IPR001357;IPR018957;IPR001841;IPR025994;IPR017907;IPR013083;IPR011364	Y	BRCA1	9606 [Organism: human] [Scientific Name: Homo sapiens]	Y	5	1T15-A02	-	-	-	-	-	-	-	-	-
3COJ	F	P38398	-	-	-	-	-	-	-	-	-	-	-	-	7.8	3.1	90	207	14	MOLECULE: BREAST CANCER TYPE 1 SUSCEPTIBILITY PROTEIN;	-	-	-	-	-	-	-	-	-	-	-	-	-	IPR001357;IPR018957;IPR001841;IPR025994;IPR017907;IPR013083;IPR011364	Y	BRCA1	9606 [Organism: human] [Scientific Name: Homo sapiens]	Y	3	1T15-A01	-	-	-	-	-	-	-	-	-
3COJ	F	P38398	-	-	-	-	-	-	-	-	-	-	-	-	7.8	3.1	90	207	14	MOLECULE: BREAST CANCER TYPE 1 SUSCEPTIBILITY PROTEIN;	-	-	-	-	-	-	-	-	-	-	-	-	-	IPR001357;IPR018957;IPR001841;IPR025994;IPR017907;IPR013083;IPR011364	Y	BRCA1	9606 [Organism: human] [Scientific Name: Homo sapiens]	Y	5	1T15-A02	-	-	-	-	-	-	-	-	-
3COJ	F	P38398	-	-	-	-	-	-	-	-	-	-	-	-	7.8	3.1	90	207	14	MOLECULE: BREAST CANCER TYPE 1 SUSCEPTIBILITY PROTEIN;	-	-	-	-	-	-	-	-	-	-	-	-	-	IPR001357;IPR018957;IPR001841;IPR025994;IPR017907;IPR013083;IPR011364	Y	BRCA1	9606 [Organism: human] [Scientific Name: Homo sapiens]	Y	5	1T15-A02	-	-	-	-	-	-	-	-	-
3COJ	F	P38398	-	-	-	-	-	-	-	-	-	-	-	-	7.8	3.1	90	207	14	MOLECULE: BREAST CANCER TYPE 1 SUSCEPTIBILITY PROTEIN;	-	-	-	-	-	-	-	-	-	-	-	-	-	IPR001357;IPR018957;IPR001841;IPR025994;IPR017907;IPR013083;IPR011364	Y	BRCA1	9606 [Organism: human] [Scientific Name: Homo sapiens]	Y	3	1T15-A01	-	-	-	-	-	-	-	-	-
3COJ	F	P38398	-	-	-	-	-	-	-	-	-	-	-	-	7.8	3.1	90	207	14	MOLECULE: BREAST CANCER TYPE 1 SUSCEPTIBILITY PROTEIN;	-	-	-	-	-	-	-	-	-	-	-	-	-	IPR001357;IPR018957;IPR001841;IPR025994;IPR017907;IPR013083;IPR011364	Y	BRCA1	9606 [Organism: human] [Scientific Name: Homo sapiens]	Y	5	1T15-A02	-	-	-	-	-	-	-	-	-
3COJ	F	P38398	-	-	-	-	-	-	-	-	-	-	-	-	7.8	3.1	90	207	14	MOLECULE: BREAST CANCER TYPE 1 SUSCEPTIBILITY PROTEIN;	-	-	-	-	-	-	-	-	-	-	-	-	-	IPR001357;IPR018957;IPR001841;IPR025994;IPR017907;IPR013083;IPR011364	Y	BRCA1	9606 [Organism: human] [Scientific Name: Homo sapiens]	Y	5	1T15-A02	-	-	-	-	-	-	-	-	-
3COJ	F	P38398	-	-	-	-	-	-	-	-	-	-	-	-	7.8	3.1	90	207	14	MOLECULE: BREAST CANCER TYPE 1 SUSCEPTIBILITY PROTEIN;	-	-	-	-	-	-	-	-	-	-	-	-	-	IPR001357;IPR018957;IPR001841;IPR025994;IPR017907;IPR013083;IPR011364	Y	BRCA1	9606 [Organism: human] [Scientific Name: Homo sapiens]	Y	3	1T15-A01	-	-	-	-	-	-	-	-	-
3COJ	F	P38398	-	-	-	-	-	-	-	-	-	-	-	-	7.8	3.1	90	207	14	MOLECULE: BREAST CANCER TYPE 1 SUSCEPTIBILITY PROTEIN;	-	-	-	-	-	-	-	-	-	-	-	-	-	IPR001357;IPR018957;IPR001841;IPR025994;IPR017907;IPR013083;IPR011364	Y	BRCA1	9606 [Organism: human] [Scientific Name: Homo sapiens]	Y	5	1T15-A02	-	-	-	-	-	-	-	-	-
3COJ	F	P38398	-	-	-	-	-	-	-	-	-	-	-	-	7.8	3.1	90	207	14	MOLECULE: BREAST CANCER TYPE 1 SUSCEPTIBILITY PROTEIN;	-	-	-	-	-	-	-	-	-	-	-	-	-	IPR001357;IPR018957;IPR001841;IPR025994;IPR017907;IPR013083;IPR011364	Y	BRCA1	9606 [Organism: human] [Scientific Name: Homo sapiens]	Y	5	1T15-A02	-	-	-	-	-	-	-	-	-
3COJ	F	P38398	-	-	-	-	-	-	-	-	-	-	-	-	7.8	3.1	90	207	14	MOLECULE: BREAST CANCER TYPE 1 SUSCEPTIBILITY PROTEIN;	-	-	-	-	-	-	-	-	-	-	-	-	-	IPR001357;IPR018957;IPR001841;IPR025994;IPR017907;IPR013083;IPR011364	Y	BRCA1	9606 [Organism: human] [Scientific Name: Homo sapiens]	Y	3	1T15-A01	-	-	-	-	-	-	-	-	-
3COJ	F	P38398	-	-	-	-	-	-	-	-	-	-	-	-	7.8	3.1	90	207	14	MOLECULE: BREAST CANCER TYPE 1 SUSCEPTIBILITY PROTEIN;	-	-	-	-	-	-	-	-	-	-	-	-	-	IPR001357;IPR018957;IPR001841;IPR025994;IPR017907;IPR013083;IPR011364	Y	BRCA1	9606 [Organism: human] [Scientific Name: Homo sapiens]	Y	5	1T15-A02	-	-	-	-	-	-	-	-	-
3K0K	A	P38398	-	-	-	-	-	-	-	-	-	-	-	-	7.8	3	90	211	16	MOLECULE: BREAST CANCER TYPE 1 SUSCEPTIBILITY PROTEIN;	-	-	-	-	-	-	-	-	-	-	-	-	-	IPR001357;IPR018957;IPR001841;IPR025994;IPR017907;IPR013083;IPR011364	Y	BRCA1	9606 [Organism: human] [Scientific Name: Homo sapiens]	Y	5	1T15-A02	-	-	-	-	-	-	-	-	-
3K0K	A	P38398	-	-	-	-	-	-	-	-	-	-	-	-	7.8	3	90	211	16	MOLECULE: BREAST CANCER TYPE 1 SUSCEPTIBILITY PROTEIN;	-	-	-	-	-	-	-	-	-	-	-	-	-	IPR001357;IPR018957;IPR001841;IPR025994;IPR017907;IPR013083;IPR011364	Y	BRCA1	9606 [Organism: human] [Scientific Name: Homo sapiens]	Y	3	1T15-A01	-	-	-	-	-	-	-	-	-
3K0K	A	P38398	-	-	-	-	-	-	-	-	-	-	-	-	7.8	3	90	211	16	MOLECULE: BREAST CANCER TYPE 1 SUSCEPTIBILITY PROTEIN;	-	-	-	-	-	-	-	-	-	-	-	-	-	IPR001357;IPR018957;IPR001841;IPR025994;IPR017907;IPR013083;IPR011364	Y	BRCA1	9606 [Organism: human] [Scientific Name: Homo sapiens]	Y	5	1T15-A02	-	-	-	-	-	-	-	-	-
3K0K	A	P38398	-	-	-	-	-	-	-	-	-	-	-	-	7.8	3	90	211	16	MOLECULE: BREAST CANCER TYPE 1 SUSCEPTIBILITY PROTEIN;	-	-	-	-	-	-	-	-	-	-	-	-	-	IPR001357;IPR018957;IPR001841;IPR025994;IPR017907;IPR013083;IPR011364	Y	BRCA1	9606 [Organism: human] [Scientific Name: Homo sapiens]	Y	5	1T15-A02	-	-	-	-	-	-	-	-	-
3K0K	A	P38398	-	-	-	-	-	-	-	-	-	-	-	-	7.8	3	90	211	16	MOLECULE: BREAST CANCER TYPE 1 SUSCEPTIBILITY PROTEIN;	-	-	-	-	-	-	-	-	-	-	-	-	-	IPR001357;IPR018957;IPR001841;IPR025994;IPR017907;IPR013083;IPR011364	Y	BRCA1	9606 [Organism: human] [Scientific Name: Homo sapiens]	Y	3	1T15-A01	-	-	-	-	-	-	-	-	-
3K0K	A	P38398	-	-	-	-	-	-	-	-	-	-	-	-	7.8	3	90	211	16	MOLECULE: BREAST CANCER TYPE 1 SUSCEPTIBILITY PROTEIN;	-	-	-	-	-	-	-	-	-	-	-	-	-	IPR001357;IPR018957;IPR001841;IPR025994;IPR017907;IPR013083;IPR011364	Y	BRCA1	9606 [Organism: human] [Scientific Name: Homo sapiens]	Y	5	1T15-A02	-	-	-	-	-	-	-	-	-
3K0K	A	P38398	-	-	-	-	-	-	-	-	-	-	-	-	7.8	3	90	211	16	MOLECULE: BREAST CANCER TYPE 1 SUSCEPTIBILITY PROTEIN;	-	-	-	-	-	-	-	-	-	-	-	-	-	IPR001357;IPR018957;IPR001841;IPR025994;IPR017907;IPR013083;IPR011364	Y	BRCA1	9606 [Organism: human] [Scientific Name: Homo sapiens]	Y	5	1T15-A02	-	-	-	-	-	-	-	-	-
3K0K	A	P38398	-	-	-	-	-	-	-	-	-	-	-	-	7.8	3	90	211	16	MOLECULE: BREAST CANCER TYPE 1 SUSCEPTIBILITY PROTEIN;	-	-	-	-	-	-	-	-	-	-	-	-	-	IPR001357;IPR018957;IPR001841;IPR025994;IPR017907;IPR013083;IPR011364	Y	BRCA1	9606 [Organism: human] [Scientific Name: Homo sapiens]	Y	3	1T15-A01	-	-	-	-	-	-	-	-	-
3K0K	A	P38398	-	-	-	-	-	-	-	-	-	-	-	-	7.8	3	90	211	16	MOLECULE: BREAST CANCER TYPE 1 SUSCEPTIBILITY PROTEIN;	-	-	-	-	-	-	-	-	-	-	-	-	-	IPR001357;IPR018957;IPR001841;IPR025994;IPR017907;IPR013083;IPR011364	Y	BRCA1	9606 [Organism: human] [Scientific Name: Homo sapiens]	Y	5	1T15-A02	-	-	-	-	-	-	-	-	-
3K0K	A	P38398	-	-	-	-	-	-	-	-	-	-	-	-	7.8	3	90	211	16	MOLECULE: BREAST CANCER TYPE 1 SUSCEPTIBILITY PROTEIN;	-	-	-	-	-	-	-	-	-	-	-	-	-	IPR001357;IPR018957;IPR001841;IPR025994;IPR017907;IPR013083;IPR011364	Y	BRCA1	9606 [Organism: human] [Scientific Name: Homo sapiens]	Y	5	1T15-A02	-	-	-	-	-	-	-	-	-
3K0K	A	P38398	-	-	-	-	-	-	-	-	-	-	-	-	7.8	3	90	211	16	MOLECULE: BREAST CANCER TYPE 1 SUSCEPTIBILITY PROTEIN;	-	-	-	-	-	-	-	-	-	-	-	-	-	IPR001357;IPR018957;IPR001841;IPR025994;IPR017907;IPR013083;IPR011364	Y	BRCA1	9606 [Organism: human] [Scientific Name: Homo sapiens]	Y	3	1T15-A01	-	-	-	-	-	-	-	-	-
3K0K	A	P38398	-	-	-	-	-	-	-	-	-	-	-	-	7.8	3	90	211	16	MOLECULE: BREAST CANCER TYPE 1 SUSCEPTIBILITY PROTEIN;	-	-	-	-	-	-	-	-	-	-	-	-	-	IPR001357;IPR018957;IPR001841;IPR025994;IPR017907;IPR013083;IPR011364	Y	BRCA1	9606 [Organism: human] [Scientific Name: Homo sapiens]	Y	5	1T15-A02	-	-	-	-	-	-	-	-	-
3K0K	A	P38398	-	-	-	-	-	-	-	-	-	-	-	-	7.8	3	90	211	16	MOLECULE: BREAST CANCER TYPE 1 SUSCEPTIBILITY PROTEIN;	-	-	-	-	-	-	-	-	-	-	-	-	-	IPR001357;IPR018957;IPR001841;IPR025994;IPR017907;IPR013083;IPR011364	Y	BRCA1	9606 [Organism: human] [Scientific Name: Homo sapiens]	Y	5	1T15-A02	-	-	-	-	-	-	-	-	-
3K0K	A	P38398	-	-	-	-	-	-	-	-	-	-	-	-	7.8	3	90	211	16	MOLECULE: BREAST CANCER TYPE 1 SUSCEPTIBILITY PROTEIN;	-	-	-	-	-	-	-	-	-	-	-	-	-	IPR001357;IPR018957;IPR001841;IPR025994;IPR017907;IPR013083;IPR011364	Y	BRCA1	9606 [Organism: human] [Scientific Name: Homo sapiens]	Y	3	1T15-A01	-	-	-	-	-	-	-	-	-
3K0K	A	P38398	-	-	-	-	-	-	-	-	-	-	-	-	7.8	3	90	211	16	MOLECULE: BREAST CANCER TYPE 1 SUSCEPTIBILITY PROTEIN;	-	-	-	-	-	-	-	-	-	-	-	-	-	IPR001357;IPR018957;IPR001841;IPR025994;IPR017907;IPR013083;IPR011364	Y	BRCA1	9606 [Organism: human] [Scientific Name: Homo sapiens]	Y	5	1T15-A02	-	-	-	-	-	-	-	-	-
3PXE	D	P38398	-	-	-	-	-	-	-	-	-	-	-	-	7.8	2.9	87	206	17	MOLECULE: BREAST CANCER TYPE 1 SUSCEPTIBILITY PROTEIN;	-	-	-	-	-	-	-	-	-	-	-	-	-	IPR001357;IPR018957;IPR001841;IPR025994;IPR017907;IPR013083;IPR011364	Y	BRCA1	9606 [Organism: human] [Scientific Name: Homo sapiens]	Y	5	1T15-A02	-	-	-	-	-	-	-	-	-
3PXE	D	P38398	-	-	-	-	-	-	-	-	-	-	-	-	7.8	2.9	87	206	17	MOLECULE: BREAST CANCER TYPE 1 SUSCEPTIBILITY PROTEIN;	-	-	-	-	-	-	-	-	-	-	-	-	-	IPR001357;IPR018957;IPR001841;IPR025994;IPR017907;IPR013083;IPR011364	Y	BRCA1	9606 [Organism: human] [Scientific Name: Homo sapiens]	Y	3	1T15-A01	-	-	-	-	-	-	-	-	-
3PXE	D	P38398	-	-	-	-	-	-	-	-	-	-	-	-	7.8	2.9	87	206	17	MOLECULE: BREAST CANCER TYPE 1 SUSCEPTIBILITY PROTEIN;	-	-	-	-	-	-	-	-	-	-	-	-	-	IPR001357;IPR018957;IPR001841;IPR025994;IPR017907;IPR013083;IPR011364	Y	BRCA1	9606 [Organism: human] [Scientific Name: Homo sapiens]	Y	5	1T15-A02	-	-	-	-	-	-	-	-	-
3PXE	D	P38398	-	-	-	-	-	-	-	-	-	-	-	-	7.8	2.9	87	206	17	MOLECULE: BREAST CANCER TYPE 1 SUSCEPTIBILITY PROTEIN;	-	-	-	-	-	-	-	-	-	-	-	-	-	IPR001357;IPR018957;IPR001841;IPR025994;IPR017907;IPR013083;IPR011364	Y	BRCA1	9606 [Organism: human] [Scientific Name: Homo sapiens]	Y	5	1T15-A02	-	-	-	-	-	-	-	-	-
3PXE	D	P38398	-	-	-	-	-	-	-	-	-	-	-	-	7.8	2.9	87	206	17	MOLECULE: BREAST CANCER TYPE 1 SUSCEPTIBILITY PROTEIN;	-	-	-	-	-	-	-	-	-	-	-	-	-	IPR001357;IPR018957;IPR001841;IPR025994;IPR017907;IPR013083;IPR011364	Y	BRCA1	9606 [Organism: human] [Scientific Name: Homo sapiens]	Y	3	1T15-A01	-	-	-	-	-	-	-	-	-
3PXE	D	P38398	-	-	-	-	-	-	-	-	-	-	-	-	7.8	2.9	87	206	17	MOLECULE: BREAST CANCER TYPE 1 SUSCEPTIBILITY PROTEIN;	-	-	-	-	-	-	-	-	-	-	-	-	-	IPR001357;IPR018957;IPR001841;IPR025994;IPR017907;IPR013083;IPR011364	Y	BRCA1	9606 [Organism: human] [Scientific Name: Homo sapiens]	Y	5	1T15-A02	-	-	-	-	-	-	-	-	-
3PXE	D	P38398	-	-	-	-	-	-	-	-	-	-	-	-	7.8	2.9	87	206	17	MOLECULE: BREAST CANCER TYPE 1 SUSCEPTIBILITY PROTEIN;	-	-	-	-	-	-	-	-	-	-	-	-	-	IPR001357;IPR018957;IPR001841;IPR025994;IPR017907;IPR013083;IPR011364	Y	BRCA1	9606 [Organism: human] [Scientific Name: Homo sapiens]	Y	5	1T15-A02	-	-	-	-	-	-	-	-	-
3PXE	D	P38398	-	-	-	-	-	-	-	-	-	-	-	-	7.8	2.9	87	206	17	MOLECULE: BREAST CANCER TYPE 1 SUSCEPTIBILITY PROTEIN;	-	-	-	-	-	-	-	-	-	-	-	-	-	IPR001357;IPR018957;IPR001841;IPR025994;IPR017907;IPR013083;IPR011364	Y	BRCA1	9606 [Organism: human] [Scientific Name: Homo sapiens]	Y	3	1T15-A01	-	-	-	-	-	-	-	-	-
3PXE	D	P38398	-	-	-	-	-	-	-	-	-	-	-	-	7.8	2.9	87	206	17	MOLECULE: BREAST CANCER TYPE 1 SUSCEPTIBILITY PROTEIN;	-	-	-	-	-	-	-	-	-	-	-	-	-	IPR001357;IPR018957;IPR001841;IPR025994;IPR017907;IPR013083;IPR011364	Y	BRCA1	9606 [Organism: human] [Scientific Name: Homo sapiens]	Y	5	1T15-A02	-	-	-	-	-	-	-	-	-
3PXE	D	P38398	-	-	-	-	-	-	-	-	-	-	-	-	7.8	2.9	87	206	17	MOLECULE: BREAST CANCER TYPE 1 SUSCEPTIBILITY PROTEIN;	-	-	-	-	-	-	-	-	-	-	-	-	-	IPR001357;IPR018957;IPR001841;IPR025994;IPR017907;IPR013083;IPR011364	Y	BRCA1	9606 [Organism: human] [Scientific Name: Homo sapiens]	Y	5	1T15-A02	-	-	-	-	-	-	-	-	-
3PXE	D	P38398	-	-	-	-	-	-	-	-	-	-	-	-	7.8	2.9	87	206	17	MOLECULE: BREAST CANCER TYPE 1 SUSCEPTIBILITY PROTEIN;	-	-	-	-	-	-	-	-	-	-	-	-	-	IPR001357;IPR018957;IPR001841;IPR025994;IPR017907;IPR013083;IPR011364	Y	BRCA1	9606 [Organism: human] [Scientific Name: Homo sapiens]	Y	3	1T15-A01	-	-	-	-	-	-	-	-	-
3PXE	D	P38398	-	-	-	-	-	-	-	-	-	-	-	-	7.8	2.9	87	206	17	MOLECULE: BREAST CANCER TYPE 1 SUSCEPTIBILITY PROTEIN;	-	-	-	-	-	-	-	-	-	-	-	-	-	IPR001357;IPR018957;IPR001841;IPR025994;IPR017907;IPR013083;IPR011364	Y	BRCA1	9606 [Organism: human] [Scientific Name: Homo sapiens]	Y	5	1T15-A02	-	-	-	-	-	-	-	-	-
3PXE	D	P38398	-	-	-	-	-	-	-	-	-	-	-	-	7.8	2.9	87	206	17	MOLECULE: BREAST CANCER TYPE 1 SUSCEPTIBILITY PROTEIN;	-	-	-	-	-	-	-	-	-	-	-	-	-	IPR001357;IPR018957;IPR001841;IPR025994;IPR017907;IPR013083;IPR011364	Y	BRCA1	9606 [Organism: human] [Scientific Name: Homo sapiens]	Y	5	1T15-A02	-	-	-	-	-	-	-	-	-
3PXE	D	P38398	-	-	-	-	-	-	-	-	-	-	-	-	7.8	2.9	87	206	17	MOLECULE: BREAST CANCER TYPE 1 SUSCEPTIBILITY PROTEIN;	-	-	-	-	-	-	-	-	-	-	-	-	-	IPR001357;IPR018957;IPR001841;IPR025994;IPR017907;IPR013083;IPR011364	Y	BRCA1	9606 [Organism: human] [Scientific Name: Homo sapiens]	Y	3	1T15-A01	-	-	-	-	-	-	-	-	-
3PXE	D	P38398	-	-	-	-	-	-	-	-	-	-	-	-	7.8	2.9	87	206	17	MOLECULE: BREAST CANCER TYPE 1 SUSCEPTIBILITY PROTEIN;	-	-	-	-	-	-	-	-	-	-	-	-	-	IPR001357;IPR018957;IPR001841;IPR025994;IPR017907;IPR013083;IPR011364	Y	BRCA1	9606 [Organism: human] [Scientific Name: Homo sapiens]	Y	5	1T15-A02	-	-	-	-	-	-	-	-	-
4IGK	A	P38398	-	-	-	-	-	-	-	-	-	-	-	-	7.8	3	88	211	16	MOLECULE: BREAST CANCER TYPE 1 SUSCEPTIBILITY PROTEIN;	-	-	-	-	-	-	-	-	-	-	-	-	-	IPR001357;IPR018957;IPR001841;IPR025994;IPR017907;IPR013083;IPR011364	Y	BRCA1	9606 [Organism: human] [Scientific Name: Homo sapiens]	Y	5	1T15-A02	-	-	-	-	-	-	-	-	-
4IGK	A	P38398	-	-	-	-	-	-	-	-	-	-	-	-	7.8	3	88	211	16	MOLECULE: BREAST CANCER TYPE 1 SUSCEPTIBILITY PROTEIN;	-	-	-	-	-	-	-	-	-	-	-	-	-	IPR001357;IPR018957;IPR001841;IPR025994;IPR017907;IPR013083;IPR011364	Y	BRCA1	9606 [Organism: human] [Scientific Name: Homo sapiens]	Y	3	1T15-A01	-	-	-	-	-	-	-	-	-
4IGK	A	P38398	-	-	-	-	-	-	-	-	-	-	-	-	7.8	3	88	211	16	MOLECULE: BREAST CANCER TYPE 1 SUSCEPTIBILITY PROTEIN;	-	-	-	-	-	-	-	-	-	-	-	-	-	IPR001357;IPR018957;IPR001841;IPR025994;IPR017907;IPR013083;IPR011364	Y	BRCA1	9606 [Organism: human] [Scientific Name: Homo sapiens]	Y	5	1T15-A02	-	-	-	-	-	-	-	-	-
4IGK	A	P38398	-	-	-	-	-	-	-	-	-	-	-	-	7.8	3	88	211	16	MOLECULE: BREAST CANCER TYPE 1 SUSCEPTIBILITY PROTEIN;	-	-	-	-	-	-	-	-	-	-	-	-	-	IPR001357;IPR018957;IPR001841;IPR025994;IPR017907;IPR013083;IPR011364	Y	BRCA1	9606 [Organism: human] [Scientific Name: Homo sapiens]	Y	5	1T15-A02	-	-	-	-	-	-	-	-	-
4IGK	A	P38398	-	-	-	-	-	-	-	-	-	-	-	-	7.8	3	88	211	16	MOLECULE: BREAST CANCER TYPE 1 SUSCEPTIBILITY PROTEIN;	-	-	-	-	-	-	-	-	-	-	-	-	-	IPR001357;IPR018957;IPR001841;IPR025994;IPR017907;IPR013083;IPR011364	Y	BRCA1	9606 [Organism: human] [Scientific Name: Homo sapiens]	Y	3	1T15-A01	-	-	-	-	-	-	-	-	-
4IGK	A	P38398	-	-	-	-	-	-	-	-	-	-	-	-	7.8	3	88	211	16	MOLECULE: BREAST CANCER TYPE 1 SUSCEPTIBILITY PROTEIN;	-	-	-	-	-	-	-	-	-	-	-	-	-	IPR001357;IPR018957;IPR001841;IPR025994;IPR017907;IPR013083;IPR011364	Y	BRCA1	9606 [Organism: human] [Scientific Name: Homo sapiens]	Y	5	1T15-A02	-	-	-	-	-	-	-	-	-
4IGK	A	P38398	-	-	-	-	-	-	-	-	-	-	-	-	7.8	3	88	211	16	MOLECULE: BREAST CANCER TYPE 1 SUSCEPTIBILITY PROTEIN;	-	-	-	-	-	-	-	-	-	-	-	-	-	IPR001357;IPR018957;IPR001841;IPR025994;IPR017907;IPR013083;IPR011364	Y	BRCA1	9606 [Organism: human] [Scientific Name: Homo sapiens]	Y	5	1T15-A02	-	-	-	-	-	-	-	-	-
4IGK	A	P38398	-	-	-	-	-	-	-	-	-	-	-	-	7.8	3	88	211	16	MOLECULE: BREAST CANCER TYPE 1 SUSCEPTIBILITY PROTEIN;	-	-	-	-	-	-	-	-	-	-	-	-	-	IPR001357;IPR018957;IPR001841;IPR025994;IPR017907;IPR013083;IPR011364	Y	BRCA1	9606 [Organism: human] [Scientific Name: Homo sapiens]	Y	3	1T15-A01	-	-	-	-	-	-	-	-	-
4IGK	A	P38398	-	-	-	-	-	-	-	-	-	-	-	-	7.8	3	88	211	16	MOLECULE: BREAST CANCER TYPE 1 SUSCEPTIBILITY PROTEIN;	-	-	-	-	-	-	-	-	-	-	-	-	-	IPR001357;IPR018957;IPR001841;IPR025994;IPR017907;IPR013083;IPR011364	Y	BRCA1	9606 [Organism: human] [Scientific Name: Homo sapiens]	Y	5	1T15-A02	-	-	-	-	-	-	-	-	-
4IGK	A	P38398	-	-	-	-	-	-	-	-	-	-	-	-	7.8	3	88	211	16	MOLECULE: BREAST CANCER TYPE 1 SUSCEPTIBILITY PROTEIN;	-	-	-	-	-	-	-	-	-	-	-	-	-	IPR001357;IPR018957;IPR001841;IPR025994;IPR017907;IPR013083;IPR011364	Y	BRCA1	9606 [Organism: human] [Scientific Name: Homo sapiens]	Y	5	1T15-A02	-	-	-	-	-	-	-	-	-
4IGK	A	P38398	-	-	-	-	-	-	-	-	-	-	-	-	7.8	3	88	211	16	MOLECULE: BREAST CANCER TYPE 1 SUSCEPTIBILITY PROTEIN;	-	-	-	-	-	-	-	-	-	-	-	-	-	IPR001357;IPR018957;IPR001841;IPR025994;IPR017907;IPR013083;IPR011364	Y	BRCA1	9606 [Organism: human] [Scientific Name: Homo sapiens]	Y	3	1T15-A01	-	-	-	-	-	-	-	-	-
4IGK	A	P38398	-	-	-	-	-	-	-	-	-	-	-	-	7.8	3	88	211	16	MOLECULE: BREAST CANCER TYPE 1 SUSCEPTIBILITY PROTEIN;	-	-	-	-	-	-	-	-	-	-	-	-	-	IPR001357;IPR018957;IPR001841;IPR025994;IPR017907;IPR013083;IPR011364	Y	BRCA1	9606 [Organism: human] [Scientific Name: Homo sapiens]	Y	5	1T15-A02	-	-	-	-	-	-	-	-	-
4IGK	A	P38398	-	-	-	-	-	-	-	-	-	-	-	-	7.8	3	88	211	16	MOLECULE: BREAST CANCER TYPE 1 SUSCEPTIBILITY PROTEIN;	-	-	-	-	-	-	-	-	-	-	-	-	-	IPR001357;IPR018957;IPR001841;IPR025994;IPR017907;IPR013083;IPR011364	Y	BRCA1	9606 [Organism: human] [Scientific Name: Homo sapiens]	Y	5	1T15-A02	-	-	-	-	-	-	-	-	-
4IGK	A	P38398	-	-	-	-	-	-	-	-	-	-	-	-	7.8	3	88	211	16	MOLECULE: BREAST CANCER TYPE 1 SUSCEPTIBILITY PROTEIN;	-	-	-	-	-	-	-	-	-	-	-	-	-	IPR001357;IPR018957;IPR001841;IPR025994;IPR017907;IPR013083;IPR011364	Y	BRCA1	9606 [Organism: human] [Scientific Name: Homo sapiens]	Y	3	1T15-A01	-	-	-	-	-	-	-	-	-
4IGK	A	P38398	-	-	-	-	-	-	-	-	-	-	-	-	7.8	3	88	211	16	MOLECULE: BREAST CANCER TYPE 1 SUSCEPTIBILITY PROTEIN;	-	-	-	-	-	-	-	-	-	-	-	-	-	IPR001357;IPR018957;IPR001841;IPR025994;IPR017907;IPR013083;IPR011364	Y	BRCA1	9606 [Organism: human] [Scientific Name: Homo sapiens]	Y	5	1T15-A02	-	-	-	-	-	-	-	-	-
1T2V	D	P38398	-	-	-	-	-	-	-	-	-	-	-	-	7.8	3.1	88	205	15	MOLECULE: BREAST CANCER TYPE 1 SUSCEPTIBILITY PROTEIN;	-	-	-	-	-	-	-	-	-	-	-	-	-	IPR001357;IPR018957;IPR001841;IPR025994;IPR017907;IPR013083;IPR011364	Y	BRCA1	9606 [Organism: human] [Scientific Name: Homo sapiens]	Y	5	1T15-A02	-	-	-	-	-	-	-	-	-
1T2V	D	P38398	-	-	-	-	-	-	-	-	-	-	-	-	7.8	3.1	88	205	15	MOLECULE: BREAST CANCER TYPE 1 SUSCEPTIBILITY PROTEIN;	-	-	-	-	-	-	-	-	-	-	-	-	-	IPR001357;IPR018957;IPR001841;IPR025994;IPR017907;IPR013083;IPR011364	Y	BRCA1	9606 [Organism: human] [Scientific Name: Homo sapiens]	Y	3	1T15-A01	-	-	-	-	-	-	-	-	-
1T2V	D	P38398	-	-	-	-	-	-	-	-	-	-	-	-	7.8	3.1	88	205	15	MOLECULE: BREAST CANCER TYPE 1 SUSCEPTIBILITY PROTEIN;	-	-	-	-	-	-	-	-	-	-	-	-	-	IPR001357;IPR018957;IPR001841;IPR025994;IPR017907;IPR013083;IPR011364	Y	BRCA1	9606 [Organism: human] [Scientific Name: Homo sapiens]	Y	5	1T15-A02	-	-	-	-	-	-	-	-	-
1T2V	D	P38398	-	-	-	-	-	-	-	-	-	-	-	-	7.8	3.1	88	205	15	MOLECULE: BREAST CANCER TYPE 1 SUSCEPTIBILITY PROTEIN;	-	-	-	-	-	-	-	-	-	-	-	-	-	IPR001357;IPR018957;IPR001841;IPR025994;IPR017907;IPR013083;IPR011364	Y	BRCA1	9606 [Organism: human] [Scientific Name: Homo sapiens]	Y	5	1T15-A02	-	-	-	-	-	-	-	-	-
1T2V	D	P38398	-	-	-	-	-	-	-	-	-	-	-	-	7.8	3.1	88	205	15	MOLECULE: BREAST CANCER TYPE 1 SUSCEPTIBILITY PROTEIN;	-	-	-	-	-	-	-	-	-	-	-	-	-	IPR001357;IPR018957;IPR001841;IPR025994;IPR017907;IPR013083;IPR011364	Y	BRCA1	9606 [Organism: human] [Scientific Name: Homo sapiens]	Y	3	1T15-A01	-	-	-	-	-	-	-	-	-
1T2V	D	P38398	-	-	-	-	-	-	-	-	-	-	-	-	7.8	3.1	88	205	15	MOLECULE: BREAST CANCER TYPE 1 SUSCEPTIBILITY PROTEIN;	-	-	-	-	-	-	-	-	-	-	-	-	-	IPR001357;IPR018957;IPR001841;IPR025994;IPR017907;IPR013083;IPR011364	Y	BRCA1	9606 [Organism: human] [Scientific Name: Homo sapiens]	Y	5	1T15-A02	-	-	-	-	-	-	-	-	-
1T2V	D	P38398	-	-	-	-	-	-	-	-	-	-	-	-	7.8	3.1	88	205	15	MOLECULE: BREAST CANCER TYPE 1 SUSCEPTIBILITY PROTEIN;	-	-	-	-	-	-	-	-	-	-	-	-	-	IPR001357;IPR018957;IPR001841;IPR025994;IPR017907;IPR013083;IPR011364	Y	BRCA1	9606 [Organism: human] [Scientific Name: Homo sapiens]	Y	5	1T15-A02	-	-	-	-	-	-	-	-	-
1T2V	D	P38398	-	-	-	-	-	-	-	-	-	-	-	-	7.8	3.1	88	205	15	MOLECULE: BREAST CANCER TYPE 1 SUSCEPTIBILITY PROTEIN;	-	-	-	-	-	-	-	-	-	-	-	-	-	IPR001357;IPR018957;IPR001841;IPR025994;IPR017907;IPR013083;IPR011364	Y	BRCA1	9606 [Organism: human] [Scientific Name: Homo sapiens]	Y	3	1T15-A01	-	-	-	-	-	-	-	-	-
1T2V	D	P38398	-	-	-	-	-	-	-	-	-	-	-	-	7.8	3.1	88	205	15	MOLECULE: BREAST CANCER TYPE 1 SUSCEPTIBILITY PROTEIN;	-	-	-	-	-	-	-	-	-	-	-	-	-	IPR001357;IPR018957;IPR001841;IPR025994;IPR017907;IPR013083;IPR011364	Y	BRCA1	9606 [Organism: human] [Scientific Name: Homo sapiens]	Y	5	1T15-A02	-	-	-	-	-	-	-	-	-
1T2V	D	P38398	-	-	-	-	-	-	-	-	-	-	-	-	7.8	3.1	88	205	15	MOLECULE: BREAST CANCER TYPE 1 SUSCEPTIBILITY PROTEIN;	-	-	-	-	-	-	-	-	-	-	-	-	-	IPR001357;IPR018957;IPR001841;IPR025994;IPR017907;IPR013083;IPR011364	Y	BRCA1	9606 [Organism: human] [Scientific Name: Homo sapiens]	Y	5	1T15-A02	-	-	-	-	-	-	-	-	-
1T2V	D	P38398	-	-	-	-	-	-	-	-	-	-	-	-	7.8	3.1	88	205	15	MOLECULE: BREAST CANCER TYPE 1 SUSCEPTIBILITY PROTEIN;	-	-	-	-	-	-	-	-	-	-	-	-	-	IPR001357;IPR018957;IPR001841;IPR025994;IPR017907;IPR013083;IPR011364	Y	BRCA1	9606 [Organism: human] [Scientific Name: Homo sapiens]	Y	3	1T15-A01	-	-	-	-	-	-	-	-	-
1T2V	D	P38398	-	-	-	-	-	-	-	-	-	-	-	-	7.8	3.1	88	205	15	MOLECULE: BREAST CANCER TYPE 1 SUSCEPTIBILITY PROTEIN;	-	-	-	-	-	-	-	-	-	-	-	-	-	IPR001357;IPR018957;IPR001841;IPR025994;IPR017907;IPR013083;IPR011364	Y	BRCA1	9606 [Organism: human] [Scientific Name: Homo sapiens]	Y	5	1T15-A02	-	-	-	-	-	-	-	-	-
1T2V	D	P38398	-	-	-	-	-	-	-	-	-	-	-	-	7.8	3.1	88	205	15	MOLECULE: BREAST CANCER TYPE 1 SUSCEPTIBILITY PROTEIN;	-	-	-	-	-	-	-	-	-	-	-	-	-	IPR001357;IPR018957;IPR001841;IPR025994;IPR017907;IPR013083;IPR011364	Y	BRCA1	9606 [Organism: human] [Scientific Name: Homo sapiens]	Y	5	1T15-A02	-	-	-	-	-	-	-	-	-
1T2V	D	P38398	-	-	-	-	-	-	-	-	-	-	-	-	7.8	3.1	88	205	15	MOLECULE: BREAST CANCER TYPE 1 SUSCEPTIBILITY PROTEIN;	-	-	-	-	-	-	-	-	-	-	-	-	-	IPR001357;IPR018957;IPR001841;IPR025994;IPR017907;IPR013083;IPR011364	Y	BRCA1	9606 [Organism: human] [Scientific Name: Homo sapiens]	Y	3	1T15-A01	-	-	-	-	-	-	-	-	-
1T2V	D	P38398	-	-	-	-	-	-	-	-	-	-	-	-	7.8	3.1	88	205	15	MOLECULE: BREAST CANCER TYPE 1 SUSCEPTIBILITY PROTEIN;	-	-	-	-	-	-	-	-	-	-	-	-	-	IPR001357;IPR018957;IPR001841;IPR025994;IPR017907;IPR013083;IPR011364	Y	BRCA1	9606 [Organism: human] [Scientific Name: Homo sapiens]	Y	5	1T15-A02	-	-	-	-	-	-	-	-	-
3COJ	X	P38398	-	-	-	-	-	-	-	-	-	-	-	-	7.7	3.1	87	208	15	MOLECULE: BREAST CANCER TYPE 1 SUSCEPTIBILITY PROTEIN;	-	-	-	-	-	-	-	-	-	-	-	-	-	IPR001357;IPR018957;IPR001841;IPR025994;IPR017907;IPR013083;IPR011364	Y	BRCA1	9606 [Organism: human] [Scientific Name: Homo sapiens]	Y	5	1T15-A02	-	-	-	-	-	-	-	-	-
3COJ	X	P38398	-	-	-	-	-	-	-	-	-	-	-	-	7.7	3.1	87	208	15	MOLECULE: BREAST CANCER TYPE 1 SUSCEPTIBILITY PROTEIN;	-	-	-	-	-	-	-	-	-	-	-	-	-	IPR001357;IPR018957;IPR001841;IPR025994;IPR017907;IPR013083;IPR011364	Y	BRCA1	9606 [Organism: human] [Scientific Name: Homo sapiens]	Y	3	1T15-A01	-	-	-	-	-	-	-	-	-
3COJ	X	P38398	-	-	-	-	-	-	-	-	-	-	-	-	7.7	3.1	87	208	15	MOLECULE: BREAST CANCER TYPE 1 SUSCEPTIBILITY PROTEIN;	-	-	-	-	-	-	-	-	-	-	-	-	-	IPR001357;IPR018957;IPR001841;IPR025994;IPR017907;IPR013083;IPR011364	Y	BRCA1	9606 [Organism: human] [Scientific Name: Homo sapiens]	Y	5	1T15-A02	-	-	-	-	-	-	-	-	-
3COJ	X	P38398	-	-	-	-	-	-	-	-	-	-	-	-	7.7	3.1	87	208	15	MOLECULE: BREAST CANCER TYPE 1 SUSCEPTIBILITY PROTEIN;	-	-	-	-	-	-	-	-	-	-	-	-	-	IPR001357;IPR018957;IPR001841;IPR025994;IPR017907;IPR013083;IPR011364	Y	BRCA1	9606 [Organism: human] [Scientific Name: Homo sapiens]	Y	5	1T15-A02	-	-	-	-	-	-	-	-	-
3COJ	X	P38398	-	-	-	-	-	-	-	-	-	-	-	-	7.7	3.1	87	208	15	MOLECULE: BREAST CANCER TYPE 1 SUSCEPTIBILITY PROTEIN;	-	-	-	-	-	-	-	-	-	-	-	-	-	IPR001357;IPR018957;IPR001841;IPR025994;IPR017907;IPR013083;IPR011364	Y	BRCA1	9606 [Organism: human] [Scientific Name: Homo sapiens]	Y	3	1T15-A01	-	-	-	-	-	-	-	-	-
3COJ	X	P38398	-	-	-	-	-	-	-	-	-	-	-	-	7.7	3.1	87	208	15	MOLECULE: BREAST CANCER TYPE 1 SUSCEPTIBILITY PROTEIN;	-	-	-	-	-	-	-	-	-	-	-	-	-	IPR001357;IPR018957;IPR001841;IPR025994;IPR017907;IPR013083;IPR011364	Y	BRCA1	9606 [Organism: human] [Scientific Name: Homo sapiens]	Y	5	1T15-A02	-	-	-	-	-	-	-	-	-
3COJ	X	P38398	-	-	-	-	-	-	-	-	-	-	-	-	7.7	3.1	87	208	15	MOLECULE: BREAST CANCER TYPE 1 SUSCEPTIBILITY PROTEIN;	-	-	-	-	-	-	-	-	-	-	-	-	-	IPR001357;IPR018957;IPR001841;IPR025994;IPR017907;IPR013083;IPR011364	Y	BRCA1	9606 [Organism: human] [Scientific Name: Homo sapiens]	Y	5	1T15-A02	-	-	-	-	-	-	-	-	-
3COJ	X	P38398	-	-	-	-	-	-	-	-	-	-	-	-	7.7	3.1	87	208	15	MOLECULE: BREAST CANCER TYPE 1 SUSCEPTIBILITY PROTEIN;	-	-	-	-	-	-	-	-	-	-	-	-	-	IPR001357;IPR018957;IPR001841;IPR025994;IPR017907;IPR013083;IPR011364	Y	BRCA1	9606 [Organism: human] [Scientific Name: Homo sapiens]	Y	3	1T15-A01	-	-	-	-	-	-	-	-	-
3COJ	X	P38398	-	-	-	-	-	-	-	-	-	-	-	-	7.7	3.1	87	208	15	MOLECULE: BREAST CANCER TYPE 1 SUSCEPTIBILITY PROTEIN;	-	-	-	-	-	-	-	-	-	-	-	-	-	IPR001357;IPR018957;IPR001841;IPR025994;IPR017907;IPR013083;IPR011364	Y	BRCA1	9606 [Organism: human] [Scientific Name: Homo sapiens]	Y	5	1T15-A02	-	-	-	-	-	-	-	-	-
3COJ	X	P38398	-	-	-	-	-	-	-	-	-	-	-	-	7.7	3.1	87	208	15	MOLECULE: BREAST CANCER TYPE 1 SUSCEPTIBILITY PROTEIN;	-	-	-	-	-	-	-	-	-	-	-	-	-	IPR001357;IPR018957;IPR001841;IPR025994;IPR017907;IPR013083;IPR011364	Y	BRCA1	9606 [Organism: human] [Scientific Name: Homo sapiens]	Y	5	1T15-A02	-	-	-	-	-	-	-	-	-
3COJ	X	P38398	-	-	-	-	-	-	-	-	-	-	-	-	7.7	3.1	87	208	15	MOLECULE: BREAST CANCER TYPE 1 SUSCEPTIBILITY PROTEIN;	-	-	-	-	-	-	-	-	-	-	-	-	-	IPR001357;IPR018957;IPR001841;IPR025994;IPR017907;IPR013083;IPR011364	Y	BRCA1	9606 [Organism: human] [Scientific Name: Homo sapiens]	Y	3	1T15-A01	-	-	-	-	-	-	-	-	-
3COJ	X	P38398	-	-	-	-	-	-	-	-	-	-	-	-	7.7	3.1	87	208	15	MOLECULE: BREAST CANCER TYPE 1 SUSCEPTIBILITY PROTEIN;	-	-	-	-	-	-	-	-	-	-	-	-	-	IPR001357;IPR018957;IPR001841;IPR025994;IPR017907;IPR013083;IPR011364	Y	BRCA1	9606 [Organism: human] [Scientific Name: Homo sapiens]	Y	5	1T15-A02	-	-	-	-	-	-	-	-	-
3COJ	X	P38398	-	-	-	-	-	-	-	-	-	-	-	-	7.7	3.1	87	208	15	MOLECULE: BREAST CANCER TYPE 1 SUSCEPTIBILITY PROTEIN;	-	-	-	-	-	-	-	-	-	-	-	-	-	IPR001357;IPR018957;IPR001841;IPR025994;IPR017907;IPR013083;IPR011364	Y	BRCA1	9606 [Organism: human] [Scientific Name: Homo sapiens]	Y	5	1T15-A02	-	-	-	-	-	-	-	-	-
3COJ	X	P38398	-	-	-	-	-	-	-	-	-	-	-	-	7.7	3.1	87	208	15	MOLECULE: BREAST CANCER TYPE 1 SUSCEPTIBILITY PROTEIN;	-	-	-	-	-	-	-	-	-	-	-	-	-	IPR001357;IPR018957;IPR001841;IPR025994;IPR017907;IPR013083;IPR011364	Y	BRCA1	9606 [Organism: human] [Scientific Name: Homo sapiens]	Y	3	1T15-A01	-	-	-	-	-	-	-	-	-
3COJ	X	P38398	-	-	-	-	-	-	-	-	-	-	-	-	7.7	3.1	87	208	15	MOLECULE: BREAST CANCER TYPE 1 SUSCEPTIBILITY PROTEIN;	-	-	-	-	-	-	-	-	-	-	-	-	-	IPR001357;IPR018957;IPR001841;IPR025994;IPR017907;IPR013083;IPR011364	Y	BRCA1	9606 [Organism: human] [Scientific Name: Homo sapiens]	Y	5	1T15-A02	-	-	-	-	-	-	-	-	-
3COJ	C	P38398	-	-	-	-	-	-	-	-	-	-	-	-	7.7	3.2	90	208	14	MOLECULE: BREAST CANCER TYPE 1 SUSCEPTIBILITY PROTEIN;	-	-	-	-	-	-	-	-	-	-	-	-	-	IPR001357;IPR018957;IPR001841;IPR025994;IPR017907;IPR013083;IPR011364	Y	BRCA1	9606 [Organism: human] [Scientific Name: Homo sapiens]	Y	5	1T15-A02	-	-	-	-	-	-	-	-	-
3COJ	C	P38398	-	-	-	-	-	-	-	-	-	-	-	-	7.7	3.2	90	208	14	MOLECULE: BREAST CANCER TYPE 1 SUSCEPTIBILITY PROTEIN;	-	-	-	-	-	-	-	-	-	-	-	-	-	IPR001357;IPR018957;IPR001841;IPR025994;IPR017907;IPR013083;IPR011364	Y	BRCA1	9606 [Organism: human] [Scientific Name: Homo sapiens]	Y	3	1T15-A01	-	-	-	-	-	-	-	-	-
3COJ	C	P38398	-	-	-	-	-	-	-	-	-	-	-	-	7.7	3.2	90	208	14	MOLECULE: BREAST CANCER TYPE 1 SUSCEPTIBILITY PROTEIN;	-	-	-	-	-	-	-	-	-	-	-	-	-	IPR001357;IPR018957;IPR001841;IPR025994;IPR017907;IPR013083;IPR011364	Y	BRCA1	9606 [Organism: human] [Scientific Name: Homo sapiens]	Y	5	1T15-A02	-	-	-	-	-	-	-	-	-
3COJ	C	P38398	-	-	-	-	-	-	-	-	-	-	-	-	7.7	3.2	90	208	14	MOLECULE: BREAST CANCER TYPE 1 SUSCEPTIBILITY PROTEIN;	-	-	-	-	-	-	-	-	-	-	-	-	-	IPR001357;IPR018957;IPR001841;IPR025994;IPR017907;IPR013083;IPR011364	Y	BRCA1	9606 [Organism: human] [Scientific Name: Homo sapiens]	Y	5	1T15-A02	-	-	-	-	-	-	-	-	-
3COJ	C	P38398	-	-	-	-	-	-	-	-	-	-	-	-	7.7	3.2	90	208	14	MOLECULE: BREAST CANCER TYPE 1 SUSCEPTIBILITY PROTEIN;	-	-	-	-	-	-	-	-	-	-	-	-	-	IPR001357;IPR018957;IPR001841;IPR025994;IPR017907;IPR013083;IPR011364	Y	BRCA1	9606 [Organism: human] [Scientific Name: Homo sapiens]	Y	3	1T15-A01	-	-	-	-	-	-	-	-	-
3COJ	C	P38398	-	-	-	-	-	-	-	-	-	-	-	-	7.7	3.2	90	208	14	MOLECULE: BREAST CANCER TYPE 1 SUSCEPTIBILITY PROTEIN;	-	-	-	-	-	-	-	-	-	-	-	-	-	IPR001357;IPR018957;IPR001841;IPR025994;IPR017907;IPR013083;IPR011364	Y	BRCA1	9606 [Organism: human] [Scientific Name: Homo sapiens]	Y	5	1T15-A02	-	-	-	-	-	-	-	-	-
3COJ	C	P38398	-	-	-	-	-	-	-	-	-	-	-	-	7.7	3.2	90	208	14	MOLECULE: BREAST CANCER TYPE 1 SUSCEPTIBILITY PROTEIN;	-	-	-	-	-	-	-	-	-	-	-	-	-	IPR001357;IPR018957;IPR001841;IPR025994;IPR017907;IPR013083;IPR011364	Y	BRCA1	9606 [Organism: human] [Scientific Name: Homo sapiens]	Y	5	1T15-A02	-	-	-	-	-	-	-	-	-
3COJ	C	P38398	-	-	-	-	-	-	-	-	-	-	-	-	7.7	3.2	90	208	14	MOLECULE: BREAST CANCER TYPE 1 SUSCEPTIBILITY PROTEIN;	-	-	-	-	-	-	-	-	-	-	-	-	-	IPR001357;IPR018957;IPR001841;IPR025994;IPR017907;IPR013083;IPR011364	Y	BRCA1	9606 [Organism: human] [Scientific Name: Homo sapiens]	Y	3	1T15-A01	-	-	-	-	-	-	-	-	-
3COJ	C	P38398	-	-	-	-	-	-	-	-	-	-	-	-	7.7	3.2	90	208	14	MOLECULE: BREAST CANCER TYPE 1 SUSCEPTIBILITY PROTEIN;	-	-	-	-	-	-	-	-	-	-	-	-	-	IPR001357;IPR018957;IPR001841;IPR025994;IPR017907;IPR013083;IPR011364	Y	BRCA1	9606 [Organism: human] [Scientific Name: Homo sapiens]	Y	5	1T15-A02	-	-	-	-	-	-	-	-	-
3COJ	C	P38398	-	-	-	-	-	-	-	-	-	-	-	-	7.7	3.2	90	208	14	MOLECULE: BREAST CANCER TYPE 1 SUSCEPTIBILITY PROTEIN;	-	-	-	-	-	-	-	-	-	-	-	-	-	IPR001357;IPR018957;IPR001841;IPR025994;IPR017907;IPR013083;IPR011364	Y	BRCA1	9606 [Organism: human] [Scientific Name: Homo sapiens]	Y	5	1T15-A02	-	-	-	-	-	-	-	-	-
3COJ	C	P38398	-	-	-	-	-	-	-	-	-	-	-	-	7.7	3.2	90	208	14	MOLECULE: BREAST CANCER TYPE 1 SUSCEPTIBILITY PROTEIN;	-	-	-	-	-	-	-	-	-	-	-	-	-	IPR001357;IPR018957;IPR001841;IPR025994;IPR017907;IPR013083;IPR011364	Y	BRCA1	9606 [Organism: human] [Scientific Name: Homo sapiens]	Y	3	1T15-A01	-	-	-	-	-	-	-	-	-
3COJ	C	P38398	-	-	-	-	-	-	-	-	-	-	-	-	7.7	3.2	90	208	14	MOLECULE: BREAST CANCER TYPE 1 SUSCEPTIBILITY PROTEIN;	-	-	-	-	-	-	-	-	-	-	-	-	-	IPR001357;IPR018957;IPR001841;IPR025994;IPR017907;IPR013083;IPR011364	Y	BRCA1	9606 [Organism: human] [Scientific Name: Homo sapiens]	Y	5	1T15-A02	-	-	-	-	-	-	-	-	-
3COJ	C	P38398	-	-	-	-	-	-	-	-	-	-	-	-	7.7	3.2	90	208	14	MOLECULE: BREAST CANCER TYPE 1 SUSCEPTIBILITY PROTEIN;	-	-	-	-	-	-	-	-	-	-	-	-	-	IPR001357;IPR018957;IPR001841;IPR025994;IPR017907;IPR013083;IPR011364	Y	BRCA1	9606 [Organism: human] [Scientific Name: Homo sapiens]	Y	5	1T15-A02	-	-	-	-	-	-	-	-	-
3COJ	C	P38398	-	-	-	-	-	-	-	-	-	-	-	-	7.7	3.2	90	208	14	MOLECULE: BREAST CANCER TYPE 1 SUSCEPTIBILITY PROTEIN;	-	-	-	-	-	-	-	-	-	-	-	-	-	IPR001357;IPR018957;IPR001841;IPR025994;IPR017907;IPR013083;IPR011364	Y	BRCA1	9606 [Organism: human] [Scientific Name: Homo sapiens]	Y	3	1T15-A01	-	-	-	-	-	-	-	-	-
3COJ	C	P38398	-	-	-	-	-	-	-	-	-	-	-	-	7.7	3.2	90	208	14	MOLECULE: BREAST CANCER TYPE 1 SUSCEPTIBILITY PROTEIN;	-	-	-	-	-	-	-	-	-	-	-	-	-	IPR001357;IPR018957;IPR001841;IPR025994;IPR017907;IPR013083;IPR011364	Y	BRCA1	9606 [Organism: human] [Scientific Name: Homo sapiens]	Y	5	1T15-A02	-	-	-	-	-	-	-	-	-
1OQA	A	P38398	-	-	-	-	-	-	-	-	-	-	-	-	7.7	2.7	83	110	11	MOLECULE: BREAST CANCER TYPE 1 SUSCEPTIBILITY PROTEIN;	-	-	-	-	-	-	-	-	-	-	-	-	-	IPR001357;IPR018957;IPR001841;IPR025994;IPR017907;IPR013083;IPR011364	Y	BRCA1	9606 [Organism: human] [Scientific Name: Homo sapiens]	Y	5	1T15-A02	-	-	-	-	-	-	-	-	-
1OQA	A	P38398	-	-	-	-	-	-	-	-	-	-	-	-	7.7	2.7	83	110	11	MOLECULE: BREAST CANCER TYPE 1 SUSCEPTIBILITY PROTEIN;	-	-	-	-	-	-	-	-	-	-	-	-	-	IPR001357;IPR018957;IPR001841;IPR025994;IPR017907;IPR013083;IPR011364	Y	BRCA1	9606 [Organism: human] [Scientific Name: Homo sapiens]	Y	3	1T15-A01	-	-	-	-	-	-	-	-	-
1OQA	A	P38398	-	-	-	-	-	-	-	-	-	-	-	-	7.7	2.7	83	110	11	MOLECULE: BREAST CANCER TYPE 1 SUSCEPTIBILITY PROTEIN;	-	-	-	-	-	-	-	-	-	-	-	-	-	IPR001357;IPR018957;IPR001841;IPR025994;IPR017907;IPR013083;IPR011364	Y	BRCA1	9606 [Organism: human] [Scientific Name: Homo sapiens]	Y	5	1T15-A02	-	-	-	-	-	-	-	-	-
1OQA	A	P38398	-	-	-	-	-	-	-	-	-	-	-	-	7.7	2.7	83	110	11	MOLECULE: BREAST CANCER TYPE 1 SUSCEPTIBILITY PROTEIN;	-	-	-	-	-	-	-	-	-	-	-	-	-	IPR001357;IPR018957;IPR001841;IPR025994;IPR017907;IPR013083;IPR011364	Y	BRCA1	9606 [Organism: human] [Scientific Name: Homo sapiens]	Y	5	1T15-A02	-	-	-	-	-	-	-	-	-
1OQA	A	P38398	-	-	-	-	-	-	-	-	-	-	-	-	7.7	2.7	83	110	11	MOLECULE: BREAST CANCER TYPE 1 SUSCEPTIBILITY PROTEIN;	-	-	-	-	-	-	-	-	-	-	-	-	-	IPR001357;IPR018957;IPR001841;IPR025994;IPR017907;IPR013083;IPR011364	Y	BRCA1	9606 [Organism: human] [Scientific Name: Homo sapiens]	Y	3	1T15-A01	-	-	-	-	-	-	-	-	-
1OQA	A	P38398	-	-	-	-	-	-	-	-	-	-	-	-	7.7	2.7	83	110	11	MOLECULE: BREAST CANCER TYPE 1 SUSCEPTIBILITY PROTEIN;	-	-	-	-	-	-	-	-	-	-	-	-	-	IPR001357;IPR018957;IPR001841;IPR025994;IPR017907;IPR013083;IPR011364	Y	BRCA1	9606 [Organism: human] [Scientific Name: Homo sapiens]	Y	5	1T15-A02	-	-	-	-	-	-	-	-	-
1OQA	A	P38398	-	-	-	-	-	-	-	-	-	-	-	-	7.7	2.7	83	110	11	MOLECULE: BREAST CANCER TYPE 1 SUSCEPTIBILITY PROTEIN;	-	-	-	-	-	-	-	-	-	-	-	-	-	IPR001357;IPR018957;IPR001841;IPR025994;IPR017907;IPR013083;IPR011364	Y	BRCA1	9606 [Organism: human] [Scientific Name: Homo sapiens]	Y	5	1T15-A02	-	-	-	-	-	-	-	-	-
1OQA	A	P38398	-	-	-	-	-	-	-	-	-	-	-	-	7.7	2.7	83	110	11	MOLECULE: BREAST CANCER TYPE 1 SUSCEPTIBILITY PROTEIN;	-	-	-	-	-	-	-	-	-	-	-	-	-	IPR001357;IPR018957;IPR001841;IPR025994;IPR017907;IPR013083;IPR011364	Y	BRCA1	9606 [Organism: human] [Scientific Name: Homo sapiens]	Y	3	1T15-A01	-	-	-	-	-	-	-	-	-
1OQA	A	P38398	-	-	-	-	-	-	-	-	-	-	-	-	7.7	2.7	83	110	11	MOLECULE: BREAST CANCER TYPE 1 SUSCEPTIBILITY PROTEIN;	-	-	-	-	-	-	-	-	-	-	-	-	-	IPR001357;IPR018957;IPR001841;IPR025994;IPR017907;IPR013083;IPR011364	Y	BRCA1	9606 [Organism: human] [Scientific Name: Homo sapiens]	Y	5	1T15-A02	-	-	-	-	-	-	-	-	-
1OQA	A	P38398	-	-	-	-	-	-	-	-	-	-	-	-	7.7	2.7	83	110	11	MOLECULE: BREAST CANCER TYPE 1 SUSCEPTIBILITY PROTEIN;	-	-	-	-	-	-	-	-	-	-	-	-	-	IPR001357;IPR018957;IPR001841;IPR025994;IPR017907;IPR013083;IPR011364	Y	BRCA1	9606 [Organism: human] [Scientific Name: Homo sapiens]	Y	5	1T15-A02	-	-	-	-	-	-	-	-	-
1OQA	A	P38398	-	-	-	-	-	-	-	-	-	-	-	-	7.7	2.7	83	110	11	MOLECULE: BREAST CANCER TYPE 1 SUSCEPTIBILITY PROTEIN;	-	-	-	-	-	-	-	-	-	-	-	-	-	IPR001357;IPR018957;IPR001841;IPR025994;IPR017907;IPR013083;IPR011364	Y	BRCA1	9606 [Organism: human] [Scientific Name: Homo sapiens]	Y	3	1T15-A01	-	-	-	-	-	-	-	-	-
1OQA	A	P38398	-	-	-	-	-	-	-	-	-	-	-	-	7.7	2.7	83	110	11	MOLECULE: BREAST CANCER TYPE 1 SUSCEPTIBILITY PROTEIN;	-	-	-	-	-	-	-	-	-	-	-	-	-	IPR001357;IPR018957;IPR001841;IPR025994;IPR017907;IPR013083;IPR011364	Y	BRCA1	9606 [Organism: human] [Scientific Name: Homo sapiens]	Y	5	1T15-A02	-	-	-	-	-	-	-	-	-
1OQA	A	P38398	-	-	-	-	-	-	-	-	-	-	-	-	7.7	2.7	83	110	11	MOLECULE: BREAST CANCER TYPE 1 SUSCEPTIBILITY PROTEIN;	-	-	-	-	-	-	-	-	-	-	-	-	-	IPR001357;IPR018957;IPR001841;IPR025994;IPR017907;IPR013083;IPR011364	Y	BRCA1	9606 [Organism: human] [Scientific Name: Homo sapiens]	Y	5	1T15-A02	-	-	-	-	-	-	-	-	-
1OQA	A	P38398	-	-	-	-	-	-	-	-	-	-	-	-	7.7	2.7	83	110	11	MOLECULE: BREAST CANCER TYPE 1 SUSCEPTIBILITY PROTEIN;	-	-	-	-	-	-	-	-	-	-	-	-	-	IPR001357;IPR018957;IPR001841;IPR025994;IPR017907;IPR013083;IPR011364	Y	BRCA1	9606 [Organism: human] [Scientific Name: Homo sapiens]	Y	3	1T15-A01	-	-	-	-	-	-	-	-	-
1OQA	A	P38398	-	-	-	-	-	-	-	-	-	-	-	-	7.7	2.7	83	110	11	MOLECULE: BREAST CANCER TYPE 1 SUSCEPTIBILITY PROTEIN;	-	-	-	-	-	-	-	-	-	-	-	-	-	IPR001357;IPR018957;IPR001841;IPR025994;IPR017907;IPR013083;IPR011364	Y	BRCA1	9606 [Organism: human] [Scientific Name: Homo sapiens]	Y	5	1T15-A02	-	-	-	-	-	-	-	-	-
3PXD	A	P38398	-	-	-	-	-	-	-	-	-	-	-	-	7.6	2.9	87	209	17	MOLECULE: BREAST CANCER TYPE 1 SUSCEPTIBILITY PROTEIN;	-	-	-	-	-	-	-	-	-	-	-	-	-	IPR001357;IPR018957;IPR001841;IPR025994;IPR017907;IPR013083;IPR011364	Y	BRCA1	9606 [Organism: human] [Scientific Name: Homo sapiens]	Y	5	1T15-A02	-	-	-	-	-	-	-	-	-
3PXD	A	P38398	-	-	-	-	-	-	-	-	-	-	-	-	7.6	2.9	87	209	17	MOLECULE: BREAST CANCER TYPE 1 SUSCEPTIBILITY PROTEIN;	-	-	-	-	-	-	-	-	-	-	-	-	-	IPR001357;IPR018957;IPR001841;IPR025994;IPR017907;IPR013083;IPR011364	Y	BRCA1	9606 [Organism: human] [Scientific Name: Homo sapiens]	Y	3	1T15-A01	-	-	-	-	-	-	-	-	-
3PXD	A	P38398	-	-	-	-	-	-	-	-	-	-	-	-	7.6	2.9	87	209	17	MOLECULE: BREAST CANCER TYPE 1 SUSCEPTIBILITY PROTEIN;	-	-	-	-	-	-	-	-	-	-	-	-	-	IPR001357;IPR018957;IPR001841;IPR025994;IPR017907;IPR013083;IPR011364	Y	BRCA1	9606 [Organism: human] [Scientific Name: Homo sapiens]	Y	5	1T15-A02	-	-	-	-	-	-	-	-	-
3PXD	A	P38398	-	-	-	-	-	-	-	-	-	-	-	-	7.6	2.9	87	209	17	MOLECULE: BREAST CANCER TYPE 1 SUSCEPTIBILITY PROTEIN;	-	-	-	-	-	-	-	-	-	-	-	-	-	IPR001357;IPR018957;IPR001841;IPR025994;IPR017907;IPR013083;IPR011364	Y	BRCA1	9606 [Organism: human] [Scientific Name: Homo sapiens]	Y	5	1T15-A02	-	-	-	-	-	-	-	-	-
3PXD	A	P38398	-	-	-	-	-	-	-	-	-	-	-	-	7.6	2.9	87	209	17	MOLECULE: BREAST CANCER TYPE 1 SUSCEPTIBILITY PROTEIN;	-	-	-	-	-	-	-	-	-	-	-	-	-	IPR001357;IPR018957;IPR001841;IPR025994;IPR017907;IPR013083;IPR011364	Y	BRCA1	9606 [Organism: human] [Scientific Name: Homo sapiens]	Y	3	1T15-A01	-	-	-	-	-	-	-	-	-
3PXD	A	P38398	-	-	-	-	-	-	-	-	-	-	-	-	7.6	2.9	87	209	17	MOLECULE: BREAST CANCER TYPE 1 SUSCEPTIBILITY PROTEIN;	-	-	-	-	-	-	-	-	-	-	-	-	-	IPR001357;IPR018957;IPR001841;IPR025994;IPR017907;IPR013083;IPR011364	Y	BRCA1	9606 [Organism: human] [Scientific Name: Homo sapiens]	Y	5	1T15-A02	-	-	-	-	-	-	-	-	-
3PXD	A	P38398	-	-	-	-	-	-	-	-	-	-	-	-	7.6	2.9	87	209	17	MOLECULE: BREAST CANCER TYPE 1 SUSCEPTIBILITY PROTEIN;	-	-	-	-	-	-	-	-	-	-	-	-	-	IPR001357;IPR018957;IPR001841;IPR025994;IPR017907;IPR013083;IPR011364	Y	BRCA1	9606 [Organism: human] [Scientific Name: Homo sapiens]	Y	5	1T15-A02	-	-	-	-	-	-	-	-	-
3PXD	A	P38398	-	-	-	-	-	-	-	-	-	-	-	-	7.6	2.9	87	209	17	MOLECULE: BREAST CANCER TYPE 1 SUSCEPTIBILITY PROTEIN;	-	-	-	-	-	-	-	-	-	-	-	-	-	IPR001357;IPR018957;IPR001841;IPR025994;IPR017907;IPR013083;IPR011364	Y	BRCA1	9606 [Organism: human] [Scientific Name: Homo sapiens]	Y	3	1T15-A01	-	-	-	-	-	-	-	-	-
3PXD	A	P38398	-	-	-	-	-	-	-	-	-	-	-	-	7.6	2.9	87	209	17	MOLECULE: BREAST CANCER TYPE 1 SUSCEPTIBILITY PROTEIN;	-	-	-	-	-	-	-	-	-	-	-	-	-	IPR001357;IPR018957;IPR001841;IPR025994;IPR017907;IPR013083;IPR011364	Y	BRCA1	9606 [Organism: human] [Scientific Name: Homo sapiens]	Y	5	1T15-A02	-	-	-	-	-	-	-	-	-
3PXD	A	P38398	-	-	-	-	-	-	-	-	-	-	-	-	7.6	2.9	87	209	17	MOLECULE: BREAST CANCER TYPE 1 SUSCEPTIBILITY PROTEIN;	-	-	-	-	-	-	-	-	-	-	-	-	-	IPR001357;IPR018957;IPR001841;IPR025994;IPR017907;IPR013083;IPR011364	Y	BRCA1	9606 [Organism: human] [Scientific Name: Homo sapiens]	Y	5	1T15-A02	-	-	-	-	-	-	-	-	-
3PXD	A	P38398	-	-	-	-	-	-	-	-	-	-	-	-	7.6	2.9	87	209	17	MOLECULE: BREAST CANCER TYPE 1 SUSCEPTIBILITY PROTEIN;	-	-	-	-	-	-	-	-	-	-	-	-	-	IPR001357;IPR018957;IPR001841;IPR025994;IPR017907;IPR013083;IPR011364	Y	BRCA1	9606 [Organism: human] [Scientific Name: Homo sapiens]	Y	3	1T15-A01	-	-	-	-	-	-	-	-	-
3PXD	A	P38398	-	-	-	-	-	-	-	-	-	-	-	-	7.6	2.9	87	209	17	MOLECULE: BREAST CANCER TYPE 1 SUSCEPTIBILITY PROTEIN;	-	-	-	-	-	-	-	-	-	-	-	-	-	IPR001357;IPR018957;IPR001841;IPR025994;IPR017907;IPR013083;IPR011364	Y	BRCA1	9606 [Organism: human] [Scientific Name: Homo sapiens]	Y	5	1T15-A02	-	-	-	-	-	-	-	-	-
3PXD	A	P38398	-	-	-	-	-	-	-	-	-	-	-	-	7.6	2.9	87	209	17	MOLECULE: BREAST CANCER TYPE 1 SUSCEPTIBILITY PROTEIN;	-	-	-	-	-	-	-	-	-	-	-	-	-	IPR001357;IPR018957;IPR001841;IPR025994;IPR017907;IPR013083;IPR011364	Y	BRCA1	9606 [Organism: human] [Scientific Name: Homo sapiens]	Y	5	1T15-A02	-	-	-	-	-	-	-	-	-
3PXD	A	P38398	-	-	-	-	-	-	-	-	-	-	-	-	7.6	2.9	87	209	17	MOLECULE: BREAST CANCER TYPE 1 SUSCEPTIBILITY PROTEIN;	-	-	-	-	-	-	-	-	-	-	-	-	-	IPR001357;IPR018957;IPR001841;IPR025994;IPR017907;IPR013083;IPR011364	Y	BRCA1	9606 [Organism: human] [Scientific Name: Homo sapiens]	Y	3	1T15-A01	-	-	-	-	-	-	-	-	-
3PXD	A	P38398	-	-	-	-	-	-	-	-	-	-	-	-	7.6	2.9	87	209	17	MOLECULE: BREAST CANCER TYPE 1 SUSCEPTIBILITY PROTEIN;	-	-	-	-	-	-	-	-	-	-	-	-	-	IPR001357;IPR018957;IPR001841;IPR025994;IPR017907;IPR013083;IPR011364	Y	BRCA1	9606 [Organism: human] [Scientific Name: Homo sapiens]	Y	5	1T15-A02	-	-	-	-	-	-	-	-	-
2ING	X	P38398	-	-	-	-	-	-	-	-	-	-	-	-	7.6	3	87	208	16	MOLECULE: BREAST CANCER TYPE 1 SUSCEPTIBILITY PROTEIN;	-	-	-	-	-	-	-	-	-	-	-	-	-	IPR001357;IPR018957;IPR001841;IPR025994;IPR017907;IPR013083;IPR011364	Y	BRCA1	9606 [Organism: human] [Scientific Name: Homo sapiens]	Y	5	1T15-A02	-	-	-	-	-	-	-	-	-
2ING	X	P38398	-	-	-	-	-	-	-	-	-	-	-	-	7.6	3	87	208	16	MOLECULE: BREAST CANCER TYPE 1 SUSCEPTIBILITY PROTEIN;	-	-	-	-	-	-	-	-	-	-	-	-	-	IPR001357;IPR018957;IPR001841;IPR025994;IPR017907;IPR013083;IPR011364	Y	BRCA1	9606 [Organism: human] [Scientific Name: Homo sapiens]	Y	3	1T15-A01	-	-	-	-	-	-	-	-	-
2ING	X	P38398	-	-	-	-	-	-	-	-	-	-	-	-	7.6	3	87	208	16	MOLECULE: BREAST CANCER TYPE 1 SUSCEPTIBILITY PROTEIN;	-	-	-	-	-	-	-	-	-	-	-	-	-	IPR001357;IPR018957;IPR001841;IPR025994;IPR017907;IPR013083;IPR011364	Y	BRCA1	9606 [Organism: human] [Scientific Name: Homo sapiens]	Y	5	1T15-A02	-	-	-	-	-	-	-	-	-
2ING	X	P38398	-	-	-	-	-	-	-	-	-	-	-	-	7.6	3	87	208	16	MOLECULE: BREAST CANCER TYPE 1 SUSCEPTIBILITY PROTEIN;	-	-	-	-	-	-	-	-	-	-	-	-	-	IPR001357;IPR018957;IPR001841;IPR025994;IPR017907;IPR013083;IPR011364	Y	BRCA1	9606 [Organism: human] [Scientific Name: Homo sapiens]	Y	5	1T15-A02	-	-	-	-	-	-	-	-	-
2ING	X	P38398	-	-	-	-	-	-	-	-	-	-	-	-	7.6	3	87	208	16	MOLECULE: BREAST CANCER TYPE 1 SUSCEPTIBILITY PROTEIN;	-	-	-	-	-	-	-	-	-	-	-	-	-	IPR001357;IPR018957;IPR001841;IPR025994;IPR017907;IPR013083;IPR011364	Y	BRCA1	9606 [Organism: human] [Scientific Name: Homo sapiens]	Y	3	1T15-A01	-	-	-	-	-	-	-	-	-
2ING	X	P38398	-	-	-	-	-	-	-	-	-	-	-	-	7.6	3	87	208	16	MOLECULE: BREAST CANCER TYPE 1 SUSCEPTIBILITY PROTEIN;	-	-	-	-	-	-	-	-	-	-	-	-	-	IPR001357;IPR018957;IPR001841;IPR025994;IPR017907;IPR013083;IPR011364	Y	BRCA1	9606 [Organism: human] [Scientific Name: Homo sapiens]	Y	5	1T15-A02	-	-	-	-	-	-	-	-	-
2ING	X	P38398	-	-	-	-	-	-	-	-	-	-	-	-	7.6	3	87	208	16	MOLECULE: BREAST CANCER TYPE 1 SUSCEPTIBILITY PROTEIN;	-	-	-	-	-	-	-	-	-	-	-	-	-	IPR001357;IPR018957;IPR001841;IPR025994;IPR017907;IPR013083;IPR011364	Y	BRCA1	9606 [Organism: human] [Scientific Name: Homo sapiens]	Y	5	1T15-A02	-	-	-	-	-	-	-	-	-
2ING	X	P38398	-	-	-	-	-	-	-	-	-	-	-	-	7.6	3	87	208	16	MOLECULE: BREAST CANCER TYPE 1 SUSCEPTIBILITY PROTEIN;	-	-	-	-	-	-	-	-	-	-	-	-	-	IPR001357;IPR018957;IPR001841;IPR025994;IPR017907;IPR013083;IPR011364	Y	BRCA1	9606 [Organism: human] [Scientific Name: Homo sapiens]	Y	3	1T15-A01	-	-	-	-	-	-	-	-	-
2ING	X	P38398	-	-	-	-	-	-	-	-	-	-	-	-	7.6	3	87	208	16	MOLECULE: BREAST CANCER TYPE 1 SUSCEPTIBILITY PROTEIN;	-	-	-	-	-	-	-	-	-	-	-	-	-	IPR001357;IPR018957;IPR001841;IPR025994;IPR017907;IPR013083;IPR011364	Y	BRCA1	9606 [Organism: human] [Scientific Name: Homo sapiens]	Y	5	1T15-A02	-	-	-	-	-	-	-	-	-
2ING	X	P38398	-	-	-	-	-	-	-	-	-	-	-	-	7.6	3	87	208	16	MOLECULE: BREAST CANCER TYPE 1 SUSCEPTIBILITY PROTEIN;	-	-	-	-	-	-	-	-	-	-	-	-	-	IPR001357;IPR018957;IPR001841;IPR025994;IPR017907;IPR013083;IPR011364	Y	BRCA1	9606 [Organism: human] [Scientific Name: Homo sapiens]	Y	5	1T15-A02	-	-	-	-	-	-	-	-	-
2ING	X	P38398	-	-	-	-	-	-	-	-	-	-	-	-	7.6	3	87	208	16	MOLECULE: BREAST CANCER TYPE 1 SUSCEPTIBILITY PROTEIN;	-	-	-	-	-	-	-	-	-	-	-	-	-	IPR001357;IPR018957;IPR001841;IPR025994;IPR017907;IPR013083;IPR011364	Y	BRCA1	9606 [Organism: human] [Scientific Name: Homo sapiens]	Y	3	1T15-A01	-	-	-	-	-	-	-	-	-
2ING	X	P38398	-	-	-	-	-	-	-	-	-	-	-	-	7.6	3	87	208	16	MOLECULE: BREAST CANCER TYPE 1 SUSCEPTIBILITY PROTEIN;	-	-	-	-	-	-	-	-	-	-	-	-	-	IPR001357;IPR018957;IPR001841;IPR025994;IPR017907;IPR013083;IPR011364	Y	BRCA1	9606 [Organism: human] [Scientific Name: Homo sapiens]	Y	5	1T15-A02	-	-	-	-	-	-	-	-	-
2ING	X	P38398	-	-	-	-	-	-	-	-	-	-	-	-	7.6	3	87	208	16	MOLECULE: BREAST CANCER TYPE 1 SUSCEPTIBILITY PROTEIN;	-	-	-	-	-	-	-	-	-	-	-	-	-	IPR001357;IPR018957;IPR001841;IPR025994;IPR017907;IPR013083;IPR011364	Y	BRCA1	9606 [Organism: human] [Scientific Name: Homo sapiens]	Y	5	1T15-A02	-	-	-	-	-	-	-	-	-
2ING	X	P38398	-	-	-	-	-	-	-	-	-	-	-	-	7.6	3	87	208	16	MOLECULE: BREAST CANCER TYPE 1 SUSCEPTIBILITY PROTEIN;	-	-	-	-	-	-	-	-	-	-	-	-	-	IPR001357;IPR018957;IPR001841;IPR025994;IPR017907;IPR013083;IPR011364	Y	BRCA1	9606 [Organism: human] [Scientific Name: Homo sapiens]	Y	3	1T15-A01	-	-	-	-	-	-	-	-	-
2ING	X	P38398	-	-	-	-	-	-	-	-	-	-	-	-	7.6	3	87	208	16	MOLECULE: BREAST CANCER TYPE 1 SUSCEPTIBILITY PROTEIN;	-	-	-	-	-	-	-	-	-	-	-	-	-	IPR001357;IPR018957;IPR001841;IPR025994;IPR017907;IPR013083;IPR011364	Y	BRCA1	9606 [Organism: human] [Scientific Name: Homo sapiens]	Y	5	1T15-A02	-	-	-	-	-	-	-	-	-
3PXE	C	P38398	-	-	-	-	-	-	-	-	-	-	-	-	7.6	3	87	211	17	MOLECULE: BREAST CANCER TYPE 1 SUSCEPTIBILITY PROTEIN;	-	-	-	-	-	-	-	-	-	-	-	-	-	IPR001357;IPR018957;IPR001841;IPR025994;IPR017907;IPR013083;IPR011364	Y	BRCA1	9606 [Organism: human] [Scientific Name: Homo sapiens]	Y	5	1T15-A02	-	-	-	-	-	-	-	-	-
3PXE	C	P38398	-	-	-	-	-	-	-	-	-	-	-	-	7.6	3	87	211	17	MOLECULE: BREAST CANCER TYPE 1 SUSCEPTIBILITY PROTEIN;	-	-	-	-	-	-	-	-	-	-	-	-	-	IPR001357;IPR018957;IPR001841;IPR025994;IPR017907;IPR013083;IPR011364	Y	BRCA1	9606 [Organism: human] [Scientific Name: Homo sapiens]	Y	3	1T15-A01	-	-	-	-	-	-	-	-	-
3PXE	C	P38398	-	-	-	-	-	-	-	-	-	-	-	-	7.6	3	87	211	17	MOLECULE: BREAST CANCER TYPE 1 SUSCEPTIBILITY PROTEIN;	-	-	-	-	-	-	-	-	-	-	-	-	-	IPR001357;IPR018957;IPR001841;IPR025994;IPR017907;IPR013083;IPR011364	Y	BRCA1	9606 [Organism: human] [Scientific Name: Homo sapiens]	Y	5	1T15-A02	-	-	-	-	-	-	-	-	-
3PXE	C	P38398	-	-	-	-	-	-	-	-	-	-	-	-	7.6	3	87	211	17	MOLECULE: BREAST CANCER TYPE 1 SUSCEPTIBILITY PROTEIN;	-	-	-	-	-	-	-	-	-	-	-	-	-	IPR001357;IPR018957;IPR001841;IPR025994;IPR017907;IPR013083;IPR011364	Y	BRCA1	9606 [Organism: human] [Scientific Name: Homo sapiens]	Y	5	1T15-A02	-	-	-	-	-	-	-	-	-
3PXE	C	P38398	-	-	-	-	-	-	-	-	-	-	-	-	7.6	3	87	211	17	MOLECULE: BREAST CANCER TYPE 1 SUSCEPTIBILITY PROTEIN;	-	-	-	-	-	-	-	-	-	-	-	-	-	IPR001357;IPR018957;IPR001841;IPR025994;IPR017907;IPR013083;IPR011364	Y	BRCA1	9606 [Organism: human] [Scientific Name: Homo sapiens]	Y	3	1T15-A01	-	-	-	-	-	-	-	-	-
3PXE	C	P38398	-	-	-	-	-	-	-	-	-	-	-	-	7.6	3	87	211	17	MOLECULE: BREAST CANCER TYPE 1 SUSCEPTIBILITY PROTEIN;	-	-	-	-	-	-	-	-	-	-	-	-	-	IPR001357;IPR018957;IPR001841;IPR025994;IPR017907;IPR013083;IPR011364	Y	BRCA1	9606 [Organism: human] [Scientific Name: Homo sapiens]	Y	5	1T15-A02	-	-	-	-	-	-	-	-	-
3PXE	C	P38398	-	-	-	-	-	-	-	-	-	-	-	-	7.6	3	87	211	17	MOLECULE: BREAST CANCER TYPE 1 SUSCEPTIBILITY PROTEIN;	-	-	-	-	-	-	-	-	-	-	-	-	-	IPR001357;IPR018957;IPR001841;IPR025994;IPR017907;IPR013083;IPR011364	Y	BRCA1	9606 [Organism: human] [Scientific Name: Homo sapiens]	Y	5	1T15-A02	-	-	-	-	-	-	-	-	-
3PXE	C	P38398	-	-	-	-	-	-	-	-	-	-	-	-	7.6	3	87	211	17	MOLECULE: BREAST CANCER TYPE 1 SUSCEPTIBILITY PROTEIN;	-	-	-	-	-	-	-	-	-	-	-	-	-	IPR001357;IPR018957;IPR001841;IPR025994;IPR017907;IPR013083;IPR011364	Y	BRCA1	9606 [Organism: human] [Scientific Name: Homo sapiens]	Y	3	1T15-A01	-	-	-	-	-	-	-	-	-
3PXE	C	P38398	-	-	-	-	-	-	-	-	-	-	-	-	7.6	3	87	211	17	MOLECULE: BREAST CANCER TYPE 1 SUSCEPTIBILITY PROTEIN;	-	-	-	-	-	-	-	-	-	-	-	-	-	IPR001357;IPR018957;IPR001841;IPR025994;IPR017907;IPR013083;IPR011364	Y	BRCA1	9606 [Organism: human] [Scientific Name: Homo sapiens]	Y	5	1T15-A02	-	-	-	-	-	-	-	-	-
3PXE	C	P38398	-	-	-	-	-	-	-	-	-	-	-	-	7.6	3	87	211	17	MOLECULE: BREAST CANCER TYPE 1 SUSCEPTIBILITY PROTEIN;	-	-	-	-	-	-	-	-	-	-	-	-	-	IPR001357;IPR018957;IPR001841;IPR025994;IPR017907;IPR013083;IPR011364	Y	BRCA1	9606 [Organism: human] [Scientific Name: Homo sapiens]	Y	5	1T15-A02	-	-	-	-	-	-	-	-	-
3PXE	C	P38398	-	-	-	-	-	-	-	-	-	-	-	-	7.6	3	87	211	17	MOLECULE: BREAST CANCER TYPE 1 SUSCEPTIBILITY PROTEIN;	-	-	-	-	-	-	-	-	-	-	-	-	-	IPR001357;IPR018957;IPR001841;IPR025994;IPR017907;IPR013083;IPR011364	Y	BRCA1	9606 [Organism: human] [Scientific Name: Homo sapiens]	Y	3	1T15-A01	-	-	-	-	-	-	-	-	-
3PXE	C	P38398	-	-	-	-	-	-	-	-	-	-	-	-	7.6	3	87	211	17	MOLECULE: BREAST CANCER TYPE 1 SUSCEPTIBILITY PROTEIN;	-	-	-	-	-	-	-	-	-	-	-	-	-	IPR001357;IPR018957;IPR001841;IPR025994;IPR017907;IPR013083;IPR011364	Y	BRCA1	9606 [Organism: human] [Scientific Name: Homo sapiens]	Y	5	1T15-A02	-	-	-	-	-	-	-	-	-
3PXE	C	P38398	-	-	-	-	-	-	-	-	-	-	-	-	7.6	3	87	211	17	MOLECULE: BREAST CANCER TYPE 1 SUSCEPTIBILITY PROTEIN;	-	-	-	-	-	-	-	-	-	-	-	-	-	IPR001357;IPR018957;IPR001841;IPR025994;IPR017907;IPR013083;IPR011364	Y	BRCA1	9606 [Organism: human] [Scientific Name: Homo sapiens]	Y	5	1T15-A02	-	-	-	-	-	-	-	-	-
3PXE	C	P38398	-	-	-	-	-	-	-	-	-	-	-	-	7.6	3	87	211	17	MOLECULE: BREAST CANCER TYPE 1 SUSCEPTIBILITY PROTEIN;	-	-	-	-	-	-	-	-	-	-	-	-	-	IPR001357;IPR018957;IPR001841;IPR025994;IPR017907;IPR013083;IPR011364	Y	BRCA1	9606 [Organism: human] [Scientific Name: Homo sapiens]	Y	3	1T15-A01	-	-	-	-	-	-	-	-	-
3PXE	C	P38398	-	-	-	-	-	-	-	-	-	-	-	-	7.6	3	87	211	17	MOLECULE: BREAST CANCER TYPE 1 SUSCEPTIBILITY PROTEIN;	-	-	-	-	-	-	-	-	-	-	-	-	-	IPR001357;IPR018957;IPR001841;IPR025994;IPR017907;IPR013083;IPR011364	Y	BRCA1	9606 [Organism: human] [Scientific Name: Homo sapiens]	Y	5	1T15-A02	-	-	-	-	-	-	-	-	-
3COJ	G	P38398	-	-	-	-	-	-	-	-	-	-	-	-	7.5	3	89	206	12	MOLECULE: BREAST CANCER TYPE 1 SUSCEPTIBILITY PROTEIN;	-	-	-	-	-	-	-	-	-	-	-	-	-	IPR001357;IPR018957;IPR001841;IPR025994;IPR017907;IPR013083;IPR011364	Y	BRCA1	9606 [Organism: human] [Scientific Name: Homo sapiens]	Y	5	1T15-A02	-	-	-	-	-	-	-	-	-
3COJ	G	P38398	-	-	-	-	-	-	-	-	-	-	-	-	7.5	3	89	206	12	MOLECULE: BREAST CANCER TYPE 1 SUSCEPTIBILITY PROTEIN;	-	-	-	-	-	-	-	-	-	-	-	-	-	IPR001357;IPR018957;IPR001841;IPR025994;IPR017907;IPR013083;IPR011364	Y	BRCA1	9606 [Organism: human] [Scientific Name: Homo sapiens]	Y	3	1T15-A01	-	-	-	-	-	-	-	-	-
3COJ	G	P38398	-	-	-	-	-	-	-	-	-	-	-	-	7.5	3	89	206	12	MOLECULE: BREAST CANCER TYPE 1 SUSCEPTIBILITY PROTEIN;	-	-	-	-	-	-	-	-	-	-	-	-	-	IPR001357;IPR018957;IPR001841;IPR025994;IPR017907;IPR013083;IPR011364	Y	BRCA1	9606 [Organism: human] [Scientific Name: Homo sapiens]	Y	5	1T15-A02	-	-	-	-	-	-	-	-	-
3COJ	G	P38398	-	-	-	-	-	-	-	-	-	-	-	-	7.5	3	89	206	12	MOLECULE: BREAST CANCER TYPE 1 SUSCEPTIBILITY PROTEIN;	-	-	-	-	-	-	-	-	-	-	-	-	-	IPR001357;IPR018957;IPR001841;IPR025994;IPR017907;IPR013083;IPR011364	Y	BRCA1	9606 [Organism: human] [Scientific Name: Homo sapiens]	Y	5	1T15-A02	-	-	-	-	-	-	-	-	-
3COJ	G	P38398	-	-	-	-	-	-	-	-	-	-	-	-	7.5	3	89	206	12	MOLECULE: BREAST CANCER TYPE 1 SUSCEPTIBILITY PROTEIN;	-	-	-	-	-	-	-	-	-	-	-	-	-	IPR001357;IPR018957;IPR001841;IPR025994;IPR017907;IPR013083;IPR011364	Y	BRCA1	9606 [Organism: human] [Scientific Name: Homo sapiens]	Y	3	1T15-A01	-	-	-	-	-	-	-	-	-
3COJ	G	P38398	-	-	-	-	-	-	-	-	-	-	-	-	7.5	3	89	206	12	MOLECULE: BREAST CANCER TYPE 1 SUSCEPTIBILITY PROTEIN;	-	-	-	-	-	-	-	-	-	-	-	-	-	IPR001357;IPR018957;IPR001841;IPR025994;IPR017907;IPR013083;IPR011364	Y	BRCA1	9606 [Organism: human] [Scientific Name: Homo sapiens]	Y	5	1T15-A02	-	-	-	-	-	-	-	-	-
3COJ	G	P38398	-	-	-	-	-	-	-	-	-	-	-	-	7.5	3	89	206	12	MOLECULE: BREAST CANCER TYPE 1 SUSCEPTIBILITY PROTEIN;	-	-	-	-	-	-	-	-	-	-	-	-	-	IPR001357;IPR018957;IPR001841;IPR025994;IPR017907;IPR013083;IPR011364	Y	BRCA1	9606 [Organism: human] [Scientific Name: Homo sapiens]	Y	5	1T15-A02	-	-	-	-	-	-	-	-	-
3COJ	G	P38398	-	-	-	-	-	-	-	-	-	-	-	-	7.5	3	89	206	12	MOLECULE: BREAST CANCER TYPE 1 SUSCEPTIBILITY PROTEIN;	-	-	-	-	-	-	-	-	-	-	-	-	-	IPR001357;IPR018957;IPR001841;IPR025994;IPR017907;IPR013083;IPR011364	Y	BRCA1	9606 [Organism: human] [Scientific Name: Homo sapiens]	Y	3	1T15-A01	-	-	-	-	-	-	-	-	-
3COJ	G	P38398	-	-	-	-	-	-	-	-	-	-	-	-	7.5	3	89	206	12	MOLECULE: BREAST CANCER TYPE 1 SUSCEPTIBILITY PROTEIN;	-	-	-	-	-	-	-	-	-	-	-	-	-	IPR001357;IPR018957;IPR001841;IPR025994;IPR017907;IPR013083;IPR011364	Y	BRCA1	9606 [Organism: human] [Scientific Name: Homo sapiens]	Y	5	1T15-A02	-	-	-	-	-	-	-	-	-
3COJ	G	P38398	-	-	-	-	-	-	-	-	-	-	-	-	7.5	3	89	206	12	MOLECULE: BREAST CANCER TYPE 1 SUSCEPTIBILITY PROTEIN;	-	-	-	-	-	-	-	-	-	-	-	-	-	IPR001357;IPR018957;IPR001841;IPR025994;IPR017907;IPR013083;IPR011364	Y	BRCA1	9606 [Organism: human] [Scientific Name: Homo sapiens]	Y	5	1T15-A02	-	-	-	-	-	-	-	-	-
3COJ	G	P38398	-	-	-	-	-	-	-	-	-	-	-	-	7.5	3	89	206	12	MOLECULE: BREAST CANCER TYPE 1 SUSCEPTIBILITY PROTEIN;	-	-	-	-	-	-	-	-	-	-	-	-	-	IPR001357;IPR018957;IPR001841;IPR025994;IPR017907;IPR013083;IPR011364	Y	BRCA1	9606 [Organism: human] [Scientific Name: Homo sapiens]	Y	3	1T15-A01	-	-	-	-	-	-	-	-	-
3COJ	G	P38398	-	-	-	-	-	-	-	-	-	-	-	-	7.5	3	89	206	12	MOLECULE: BREAST CANCER TYPE 1 SUSCEPTIBILITY PROTEIN;	-	-	-	-	-	-	-	-	-	-	-	-	-	IPR001357;IPR018957;IPR001841;IPR025994;IPR017907;IPR013083;IPR011364	Y	BRCA1	9606 [Organism: human] [Scientific Name: Homo sapiens]	Y	5	1T15-A02	-	-	-	-	-	-	-	-	-
3COJ	G	P38398	-	-	-	-	-	-	-	-	-	-	-	-	7.5	3	89	206	12	MOLECULE: BREAST CANCER TYPE 1 SUSCEPTIBILITY PROTEIN;	-	-	-	-	-	-	-	-	-	-	-	-	-	IPR001357;IPR018957;IPR001841;IPR025994;IPR017907;IPR013083;IPR011364	Y	BRCA1	9606 [Organism: human] [Scientific Name: Homo sapiens]	Y	5	1T15-A02	-	-	-	-	-	-	-	-	-
3COJ	G	P38398	-	-	-	-	-	-	-	-	-	-	-	-	7.5	3	89	206	12	MOLECULE: BREAST CANCER TYPE 1 SUSCEPTIBILITY PROTEIN;	-	-	-	-	-	-	-	-	-	-	-	-	-	IPR001357;IPR018957;IPR001841;IPR025994;IPR017907;IPR013083;IPR011364	Y	BRCA1	9606 [Organism: human] [Scientific Name: Homo sapiens]	Y	3	1T15-A01	-	-	-	-	-	-	-	-	-
3COJ	G	P38398	-	-	-	-	-	-	-	-	-	-	-	-	7.5	3	89	206	12	MOLECULE: BREAST CANCER TYPE 1 SUSCEPTIBILITY PROTEIN;	-	-	-	-	-	-	-	-	-	-	-	-	-	IPR001357;IPR018957;IPR001841;IPR025994;IPR017907;IPR013083;IPR011364	Y	BRCA1	9606 [Organism: human] [Scientific Name: Homo sapiens]	Y	5	1T15-A02	-	-	-	-	-	-	-	-	-
3COJ	D	P38398	-	-	-	-	-	-	-	-	-	-	-	-	7.5	3	86	207	17	MOLECULE: BREAST CANCER TYPE 1 SUSCEPTIBILITY PROTEIN;	-	-	-	-	-	-	-	-	-	-	-	-	-	IPR001357;IPR018957;IPR001841;IPR025994;IPR017907;IPR013083;IPR011364	Y	BRCA1	9606 [Organism: human] [Scientific Name: Homo sapiens]	Y	5	1T15-A02	-	-	-	-	-	-	-	-	-
3COJ	D	P38398	-	-	-	-	-	-	-	-	-	-	-	-	7.5	3	86	207	17	MOLECULE: BREAST CANCER TYPE 1 SUSCEPTIBILITY PROTEIN;	-	-	-	-	-	-	-	-	-	-	-	-	-	IPR001357;IPR018957;IPR001841;IPR025994;IPR017907;IPR013083;IPR011364	Y	BRCA1	9606 [Organism: human] [Scientific Name: Homo sapiens]	Y	3	1T15-A01	-	-	-	-	-	-	-	-	-
3COJ	D	P38398	-	-	-	-	-	-	-	-	-	-	-	-	7.5	3	86	207	17	MOLECULE: BREAST CANCER TYPE 1 SUSCEPTIBILITY PROTEIN;	-	-	-	-	-	-	-	-	-	-	-	-	-	IPR001357;IPR018957;IPR001841;IPR025994;IPR017907;IPR013083;IPR011364	Y	BRCA1	9606 [Organism: human] [Scientific Name: Homo sapiens]	Y	5	1T15-A02	-	-	-	-	-	-	-	-	-
3COJ	D	P38398	-	-	-	-	-	-	-	-	-	-	-	-	7.5	3	86	207	17	MOLECULE: BREAST CANCER TYPE 1 SUSCEPTIBILITY PROTEIN;	-	-	-	-	-	-	-	-	-	-	-	-	-	IPR001357;IPR018957;IPR001841;IPR025994;IPR017907;IPR013083;IPR011364	Y	BRCA1	9606 [Organism: human] [Scientific Name: Homo sapiens]	Y	5	1T15-A02	-	-	-	-	-	-	-	-	-
3COJ	D	P38398	-	-	-	-	-	-	-	-	-	-	-	-	7.5	3	86	207	17	MOLECULE: BREAST CANCER TYPE 1 SUSCEPTIBILITY PROTEIN;	-	-	-	-	-	-	-	-	-	-	-	-	-	IPR001357;IPR018957;IPR001841;IPR025994;IPR017907;IPR013083;IPR011364	Y	BRCA1	9606 [Organism: human] [Scientific Name: Homo sapiens]	Y	3	1T15-A01	-	-	-	-	-	-	-	-	-
3COJ	D	P38398	-	-	-	-	-	-	-	-	-	-	-	-	7.5	3	86	207	17	MOLECULE: BREAST CANCER TYPE 1 SUSCEPTIBILITY PROTEIN;	-	-	-	-	-	-	-	-	-	-	-	-	-	IPR001357;IPR018957;IPR001841;IPR025994;IPR017907;IPR013083;IPR011364	Y	BRCA1	9606 [Organism: human] [Scientific Name: Homo sapiens]	Y	5	1T15-A02	-	-	-	-	-	-	-	-	-
3COJ	D	P38398	-	-	-	-	-	-	-	-	-	-	-	-	7.5	3	86	207	17	MOLECULE: BREAST CANCER TYPE 1 SUSCEPTIBILITY PROTEIN;	-	-	-	-	-	-	-	-	-	-	-	-	-	IPR001357;IPR018957;IPR001841;IPR025994;IPR017907;IPR013083;IPR011364	Y	BRCA1	9606 [Organism: human] [Scientific Name: Homo sapiens]	Y	5	1T15-A02	-	-	-	-	-	-	-	-	-
3COJ	D	P38398	-	-	-	-	-	-	-	-	-	-	-	-	7.5	3	86	207	17	MOLECULE: BREAST CANCER TYPE 1 SUSCEPTIBILITY PROTEIN;	-	-	-	-	-	-	-	-	-	-	-	-	-	IPR001357;IPR018957;IPR001841;IPR025994;IPR017907;IPR013083;IPR011364	Y	BRCA1	9606 [Organism: human] [Scientific Name: Homo sapiens]	Y	3	1T15-A01	-	-	-	-	-	-	-	-	-
3COJ	D	P38398	-	-	-	-	-	-	-	-	-	-	-	-	7.5	3	86	207	17	MOLECULE: BREAST CANCER TYPE 1 SUSCEPTIBILITY PROTEIN;	-	-	-	-	-	-	-	-	-	-	-	-	-	IPR001357;IPR018957;IPR001841;IPR025994;IPR017907;IPR013083;IPR011364	Y	BRCA1	9606 [Organism: human] [Scientific Name: Homo sapiens]	Y	5	1T15-A02	-	-	-	-	-	-	-	-	-
3COJ	D	P38398	-	-	-	-	-	-	-	-	-	-	-	-	7.5	3	86	207	17	MOLECULE: BREAST CANCER TYPE 1 SUSCEPTIBILITY PROTEIN;	-	-	-	-	-	-	-	-	-	-	-	-	-	IPR001357;IPR018957;IPR001841;IPR025994;IPR017907;IPR013083;IPR011364	Y	BRCA1	9606 [Organism: human] [Scientific Name: Homo sapiens]	Y	5	1T15-A02	-	-	-	-	-	-	-	-	-
3COJ	D	P38398	-	-	-	-	-	-	-	-	-	-	-	-	7.5	3	86	207	17	MOLECULE: BREAST CANCER TYPE 1 SUSCEPTIBILITY PROTEIN;	-	-	-	-	-	-	-	-	-	-	-	-	-	IPR001357;IPR018957;IPR001841;IPR025994;IPR017907;IPR013083;IPR011364	Y	BRCA1	9606 [Organism: human] [Scientific Name: Homo sapiens]	Y	3	1T15-A01	-	-	-	-	-	-	-	-	-
3COJ	D	P38398	-	-	-	-	-	-	-	-	-	-	-	-	7.5	3	86	207	17	MOLECULE: BREAST CANCER TYPE 1 SUSCEPTIBILITY PROTEIN;	-	-	-	-	-	-	-	-	-	-	-	-	-	IPR001357;IPR018957;IPR001841;IPR025994;IPR017907;IPR013083;IPR011364	Y	BRCA1	9606 [Organism: human] [Scientific Name: Homo sapiens]	Y	5	1T15-A02	-	-	-	-	-	-	-	-	-
3COJ	D	P38398	-	-	-	-	-	-	-	-	-	-	-	-	7.5	3	86	207	17	MOLECULE: BREAST CANCER TYPE 1 SUSCEPTIBILITY PROTEIN;	-	-	-	-	-	-	-	-	-	-	-	-	-	IPR001357;IPR018957;IPR001841;IPR025994;IPR017907;IPR013083;IPR011364	Y	BRCA1	9606 [Organism: human] [Scientific Name: Homo sapiens]	Y	5	1T15-A02	-	-	-	-	-	-	-	-	-
3COJ	D	P38398	-	-	-	-	-	-	-	-	-	-	-	-	7.5	3	86	207	17	MOLECULE: BREAST CANCER TYPE 1 SUSCEPTIBILITY PROTEIN;	-	-	-	-	-	-	-	-	-	-	-	-	-	IPR001357;IPR018957;IPR001841;IPR025994;IPR017907;IPR013083;IPR011364	Y	BRCA1	9606 [Organism: human] [Scientific Name: Homo sapiens]	Y	3	1T15-A01	-	-	-	-	-	-	-	-	-
3COJ	D	P38398	-	-	-	-	-	-	-	-	-	-	-	-	7.5	3	86	207	17	MOLECULE: BREAST CANCER TYPE 1 SUSCEPTIBILITY PROTEIN;	-	-	-	-	-	-	-	-	-	-	-	-	-	IPR001357;IPR018957;IPR001841;IPR025994;IPR017907;IPR013083;IPR011364	Y	BRCA1	9606 [Organism: human] [Scientific Name: Homo sapiens]	Y	5	1T15-A02	-	-	-	-	-	-	-	-	-
2WT8	B	Q8NEM0	-	-	-	-	-	-	-	-	-	-	-	-	9.2	2.4	83	95	12	MOLECULE: MICROCEPHALIN;	-	-	-	-	-	-	-	-	-	-	-	-	-	IPR001357;IPR022047	Y	MCPH1	9606 [Organism: human] [Scientific Name: Homo sapiens]	Y	18	2WT8-B	-	-	-	-	-	-	-	-	-
2WT8	B	Q8NEM0	-	-	-	-	-	-	-	-	-	-	-	-	9.2	2.4	83	95	12	MOLECULE: MICROCEPHALIN;	-	-	-	-	-	-	-	-	-	-	-	-	-	IPR001357;IPR022047	Y	MCPH1	9606 [Organism: human] [Scientific Name: Homo sapiens]	Y	18	2WT8-B	-	-	-	-	-	-	-	-	-
2WT8	B	Q8NEM0	-	-	-	-	-	-	-	-	-	-	-	-	9.2	2.4	83	95	12	MOLECULE: MICROCEPHALIN;	-	-	-	-	-	-	-	-	-	-	-	-	-	IPR001357;IPR022047	Y	MCPH1	9606 [Organism: human] [Scientific Name: Homo sapiens]	Y	18	2WT8-B	-	-	-	-	-	-	-	-	-
2WT8	B	Q8NEM0	-	-	-	-	-	-	-	-	-	-	-	-	9.2	2.4	83	95	12	MOLECULE: MICROCEPHALIN;	-	-	-	-	-	-	-	-	-	-	-	-	-	IPR001357;IPR022047	Y	MCPH1	9606 [Organism: human] [Scientific Name: Homo sapiens]	Y	18	2WT8-B	-	-	-	-	-	-	-	-	-
2WT8	B	Q8NEM0	-	-	-	-	-	-	-	-	-	-	-	-	9.2	2.4	83	95	12	MOLECULE: MICROCEPHALIN;	-	-	-	-	-	-	-	-	-	-	-	-	-	IPR001357;IPR022047	Y	MCPH1	9606 [Organism: human] [Scientific Name: Homo sapiens]	Y	18	2WT8-B	-	-	-	-	-	-	-	-	-
2WT8	B	Q8NEM0	-	-	-	-	-	-	-	-	-	-	-	-	9.2	2.4	83	95	12	MOLECULE: MICROCEPHALIN;	-	-	-	-	-	-	-	-	-	-	-	-	-	IPR001357;IPR022047	Y	MCPH1	9606 [Organism: human] [Scientific Name: Homo sapiens]	Y	18	2WT8-B	-	-	-	-	-	-	-	-	-
2WT8	B	Q8NEM0	-	-	-	-	-	-	-	-	-	-	-	-	9.2	2.4	83	95	12	MOLECULE: MICROCEPHALIN;	-	-	-	-	-	-	-	-	-	-	-	-	-	IPR001357;IPR022047	Y	MCPH1	9606 [Organism: human] [Scientific Name: Homo sapiens]	Y	18	2WT8-B	-	-	-	-	-	-	-	-	-
2WT8	B	Q8NEM0	-	-	-	-	-	-	-	-	-	-	-	-	9.2	2.4	83	95	12	MOLECULE: MICROCEPHALIN;	-	-	-	-	-	-	-	-	-	-	-	-	-	IPR001357;IPR022047	Y	MCPH1	9606 [Organism: human] [Scientific Name: Homo sapiens]	Y	18	2WT8-B	-	-	-	-	-	-	-	-	-
2WT8	B	Q8NEM0	-	-	-	-	-	-	-	-	-	-	-	-	9.2	2.4	83	95	12	MOLECULE: MICROCEPHALIN;	-	-	-	-	-	-	-	-	-	-	-	-	-	IPR001357;IPR022047	Y	MCPH1	9606 [Organism: human] [Scientific Name: Homo sapiens]	Y	18	2WT8-B	-	-	-	-	-	-	-	-	-
2WT8	B	Q8NEM0	-	-	-	-	-	-	-	-	-	-	-	-	9.2	2.4	83	95	12	MOLECULE: MICROCEPHALIN;	-	-	-	-	-	-	-	-	-	-	-	-	-	IPR001357;IPR022047	Y	MCPH1	9606 [Organism: human] [Scientific Name: Homo sapiens]	Y	18	2WT8-B	-	-	-	-	-	-	-	-	-
2WT8	B	Q8NEM0	-	-	-	-	-	-	-	-	-	-	-	-	9.2	2.4	83	95	12	MOLECULE: MICROCEPHALIN;	-	-	-	-	-	-	-	-	-	-	-	-	-	IPR001357;IPR022047	Y	MCPH1	9606 [Organism: human] [Scientific Name: Homo sapiens]	Y	18	2WT8-B	-	-	-	-	-	-	-	-	-
2WT8	B	Q8NEM0	-	-	-	-	-	-	-	-	-	-	-	-	9.2	2.4	83	95	12	MOLECULE: MICROCEPHALIN;	-	-	-	-	-	-	-	-	-	-	-	-	-	IPR001357;IPR022047	Y	MCPH1	9606 [Organism: human] [Scientific Name: Homo sapiens]	Y	18	2WT8-B	-	-	-	-	-	-	-	-	-
2WT8	B	Q8NEM0	-	-	-	-	-	-	-	-	-	-	-	-	9.2	2.4	83	95	12	MOLECULE: MICROCEPHALIN;	-	-	-	-	-	-	-	-	-	-	-	-	-	IPR001357;IPR022047	Y	MCPH1	9606 [Organism: human] [Scientific Name: Homo sapiens]	Y	18	2WT8-B	-	-	-	-	-	-	-	-	-
2WT8	B	Q8NEM0	-	-	-	-	-	-	-	-	-	-	-	-	9.2	2.4	83	95	12	MOLECULE: MICROCEPHALIN;	-	-	-	-	-	-	-	-	-	-	-	-	-	IPR001357;IPR022047	Y	MCPH1	9606 [Organism: human] [Scientific Name: Homo sapiens]	Y	18	2WT8-B	-	-	-	-	-	-	-	-	-
2WT8	B	Q8NEM0	-	-	-	-	-	-	-	-	-	-	-	-	9.2	2.4	83	95	12	MOLECULE: MICROCEPHALIN;	-	-	-	-	-	-	-	-	-	-	-	-	-	IPR001357;IPR022047	Y	MCPH1	9606 [Organism: human] [Scientific Name: Homo sapiens]	Y	18	2WT8-B	-	-	-	-	-	-	-	-	-
2WT8	B	Q8NEM0	-	-	-	-	-	-	-	-	-	-	-	-	9.2	2.4	83	95	12	MOLECULE: MICROCEPHALIN;	-	-	-	-	-	-	-	-	-	-	-	-	-	IPR001357;IPR022047	Y	MCPH1	9606 [Organism: human] [Scientific Name: Homo sapiens]	Y	18	2WT8-B	-	-	-	-	-	-	-	-	-
2WT8	B	Q8NEM0	-	-	-	-	-	-	-	-	-	-	-	-	9.2	2.4	83	95	12	MOLECULE: MICROCEPHALIN;	-	-	-	-	-	-	-	-	-	-	-	-	-	IPR001357;IPR022047	Y	MCPH1	9606 [Organism: human] [Scientific Name: Homo sapiens]	Y	18	2WT8-B	-	-	-	-	-	-	-	-	-
2WT8	B	Q8NEM0	-	-	-	-	-	-	-	-	-	-	-	-	9.2	2.4	83	95	12	MOLECULE: MICROCEPHALIN;	-	-	-	-	-	-	-	-	-	-	-	-	-	IPR001357;IPR022047	Y	MCPH1	9606 [Organism: human] [Scientific Name: Homo sapiens]	Y	18	2WT8-B	-	-	-	-	-	-	-	-	-
2WT8	B	Q8NEM0	-	-	-	-	-	-	-	-	-	-	-	-	9.2	2.4	83	95	12	MOLECULE: MICROCEPHALIN;	-	-	-	-	-	-	-	-	-	-	-	-	-	IPR001357;IPR022047	Y	MCPH1	9606 [Organism: human] [Scientific Name: Homo sapiens]	Y	18	2WT8-B	-	-	-	-	-	-	-	-	-
2WT8	B	Q8NEM0	-	-	-	-	-	-	-	-	-	-	-	-	9.2	2.4	83	95	12	MOLECULE: MICROCEPHALIN;	-	-	-	-	-	-	-	-	-	-	-	-	-	IPR001357;IPR022047	Y	MCPH1	9606 [Organism: human] [Scientific Name: Homo sapiens]	Y	18	2WT8-B	-	-	-	-	-	-	-	-	-
2WT8	B	Q8NEM0	-	-	-	-	-	-	-	-	-	-	-	-	9.2	2.4	83	95	12	MOLECULE: MICROCEPHALIN;	-	-	-	-	-	-	-	-	-	-	-	-	-	IPR001357;IPR022047	Y	MCPH1	9606 [Organism: human] [Scientific Name: Homo sapiens]	Y	18	2WT8-B	-	-	-	-	-	-	-	-	-
2WT8	B	Q8NEM0	-	-	-	-	-	-	-	-	-	-	-	-	9.2	2.4	83	95	12	MOLECULE: MICROCEPHALIN;	-	-	-	-	-	-	-	-	-	-	-	-	-	IPR001357;IPR022047	Y	MCPH1	9606 [Organism: human] [Scientific Name: Homo sapiens]	Y	18	2WT8-B	-	-	-	-	-	-	-	-	-
2WT8	B	Q8NEM0	-	-	-	-	-	-	-	-	-	-	-	-	9.2	2.4	83	95	12	MOLECULE: MICROCEPHALIN;	-	-	-	-	-	-	-	-	-	-	-	-	-	IPR001357;IPR022047	Y	MCPH1	9606 [Organism: human] [Scientific Name: Homo sapiens]	Y	18	2WT8-B	-	-	-	-	-	-	-	-	-
2WT8	B	Q8NEM0	-	-	-	-	-	-	-	-	-	-	-	-	9.2	2.4	83	95	12	MOLECULE: MICROCEPHALIN;	-	-	-	-	-	-	-	-	-	-	-	-	-	IPR001357;IPR022047	Y	MCPH1	9606 [Organism: human] [Scientific Name: Homo sapiens]	Y	18	2WT8-B	-	-	-	-	-	-	-	-	-
2WT8	B	Q8NEM0	-	-	-	-	-	-	-	-	-	-	-	-	9.2	2.4	83	95	12	MOLECULE: MICROCEPHALIN;	-	-	-	-	-	-	-	-	-	-	-	-	-	IPR001357;IPR022047	Y	MCPH1	9606 [Organism: human] [Scientific Name: Homo sapiens]	Y	18	2WT8-B	-	-	-	-	-	-	-	-	-
2WT8	B	Q8NEM0	-	-	-	-	-	-	-	-	-	-	-	-	9.2	2.4	83	95	12	MOLECULE: MICROCEPHALIN;	-	-	-	-	-	-	-	-	-	-	-	-	-	IPR001357;IPR022047	Y	MCPH1	9606 [Organism: human] [Scientific Name: Homo sapiens]	Y	18	2WT8-B	-	-	-	-	-	-	-	-	-
2WT8	B	Q8NEM0	-	-	-	-	-	-	-	-	-	-	-	-	9.2	2.4	83	95	12	MOLECULE: MICROCEPHALIN;	-	-	-	-	-	-	-	-	-	-	-	-	-	IPR001357;IPR022047	Y	MCPH1	9606 [Organism: human] [Scientific Name: Homo sapiens]	Y	18	2WT8-B	-	-	-	-	-	-	-	-	-
2WT8	B	Q8NEM0	-	-	-	-	-	-	-	-	-	-	-	-	9.2	2.4	83	95	12	MOLECULE: MICROCEPHALIN;	-	-	-	-	-	-	-	-	-	-	-	-	-	IPR001357;IPR022047	Y	MCPH1	9606 [Organism: human] [Scientific Name: Homo sapiens]	Y	18	2WT8-B	-	-	-	-	-	-	-	-	-
2WT8	B	Q8NEM0	-	-	-	-	-	-	-	-	-	-	-	-	9.2	2.4	83	95	12	MOLECULE: MICROCEPHALIN;	-	-	-	-	-	-	-	-	-	-	-	-	-	IPR001357;IPR022047	Y	MCPH1	9606 [Organism: human] [Scientific Name: Homo sapiens]	Y	18	2WT8-B	-	-	-	-	-	-	-	-	-
2WT8	B	Q8NEM0	-	-	-	-	-	-	-	-	-	-	-	-	9.2	2.4	83	95	12	MOLECULE: MICROCEPHALIN;	-	-	-	-	-	-	-	-	-	-	-	-	-	IPR001357;IPR022047	Y	MCPH1	9606 [Organism: human] [Scientific Name: Homo sapiens]	Y	18	2WT8-B	-	-	-	-	-	-	-	-	-
2WT8	B	Q8NEM0	-	-	-	-	-	-	-	-	-	-	-	-	9.2	2.4	83	95	12	MOLECULE: MICROCEPHALIN;	-	-	-	-	-	-	-	-	-	-	-	-	-	IPR001357;IPR022047	Y	MCPH1	9606 [Organism: human] [Scientific Name: Homo sapiens]	Y	14	3U3Z-A01	-	-	-	-	-	-	-	-	-
2WT8	B	Q8NEM0	-	-	-	-	-	-	-	-	-	-	-	-	9.2	2.4	83	95	12	MOLECULE: MICROCEPHALIN;	-	-	-	-	-	-	-	-	-	-	-	-	-	IPR001357;IPR022047	Y	MCPH1	9606 [Organism: human] [Scientific Name: Homo sapiens]	Y	27	3U3Z-A02	-	-	-	-	-	-	-	-	-
2WT8	A	Q8NEM0	-	-	-	-	-	-	-	-	-	-	-	-	9.2	2.3	82	97	11	MOLECULE: MICROCEPHALIN;	-	-	-	-	-	-	-	-	-	-	-	-	-	IPR001357;IPR022047	Y	MCPH1	9606 [Organism: human] [Scientific Name: Homo sapiens]	Y	18	2WT8-B	-	-	-	-	-	-	-	-	-
2WT8	A	Q8NEM0	-	-	-	-	-	-	-	-	-	-	-	-	9.2	2.3	82	97	11	MOLECULE: MICROCEPHALIN;	-	-	-	-	-	-	-	-	-	-	-	-	-	IPR001357;IPR022047	Y	MCPH1	9606 [Organism: human] [Scientific Name: Homo sapiens]	Y	18	2WT8-B	-	-	-	-	-	-	-	-	-
2WT8	A	Q8NEM0	-	-	-	-	-	-	-	-	-	-	-	-	9.2	2.3	82	97	11	MOLECULE: MICROCEPHALIN;	-	-	-	-	-	-	-	-	-	-	-	-	-	IPR001357;IPR022047	Y	MCPH1	9606 [Organism: human] [Scientific Name: Homo sapiens]	Y	18	2WT8-B	-	-	-	-	-	-	-	-	-
2WT8	A	Q8NEM0	-	-	-	-	-	-	-	-	-	-	-	-	9.2	2.3	82	97	11	MOLECULE: MICROCEPHALIN;	-	-	-	-	-	-	-	-	-	-	-	-	-	IPR001357;IPR022047	Y	MCPH1	9606 [Organism: human] [Scientific Name: Homo sapiens]	Y	18	2WT8-B	-	-	-	-	-	-	-	-	-
2WT8	A	Q8NEM0	-	-	-	-	-	-	-	-	-	-	-	-	9.2	2.3	82	97	11	MOLECULE: MICROCEPHALIN;	-	-	-	-	-	-	-	-	-	-	-	-	-	IPR001357;IPR022047	Y	MCPH1	9606 [Organism: human] [Scientific Name: Homo sapiens]	Y	18	2WT8-B	-	-	-	-	-	-	-	-	-
2WT8	A	Q8NEM0	-	-	-	-	-	-	-	-	-	-	-	-	9.2	2.3	82	97	11	MOLECULE: MICROCEPHALIN;	-	-	-	-	-	-	-	-	-	-	-	-	-	IPR001357;IPR022047	Y	MCPH1	9606 [Organism: human] [Scientific Name: Homo sapiens]	Y	18	2WT8-B	-	-	-	-	-	-	-	-	-
2WT8	A	Q8NEM0	-	-	-	-	-	-	-	-	-	-	-	-	9.2	2.3	82	97	11	MOLECULE: MICROCEPHALIN;	-	-	-	-	-	-	-	-	-	-	-	-	-	IPR001357;IPR022047	Y	MCPH1	9606 [Organism: human] [Scientific Name: Homo sapiens]	Y	18	2WT8-B	-	-	-	-	-	-	-	-	-
2WT8	A	Q8NEM0	-	-	-	-	-	-	-	-	-	-	-	-	9.2	2.3	82	97	11	MOLECULE: MICROCEPHALIN;	-	-	-	-	-	-	-	-	-	-	-	-	-	IPR001357;IPR022047	Y	MCPH1	9606 [Organism: human] [Scientific Name: Homo sapiens]	Y	18	2WT8-B	-	-	-	-	-	-	-	-	-
2WT8	A	Q8NEM0	-	-	-	-	-	-	-	-	-	-	-	-	9.2	2.3	82	97	11	MOLECULE: MICROCEPHALIN;	-	-	-	-	-	-	-	-	-	-	-	-	-	IPR001357;IPR022047	Y	MCPH1	9606 [Organism: human] [Scientific Name: Homo sapiens]	Y	18	2WT8-B	-	-	-	-	-	-	-	-	-
2WT8	A	Q8NEM0	-	-	-	-	-	-	-	-	-	-	-	-	9.2	2.3	82	97	11	MOLECULE: MICROCEPHALIN;	-	-	-	-	-	-	-	-	-	-	-	-	-	IPR001357;IPR022047	Y	MCPH1	9606 [Organism: human] [Scientific Name: Homo sapiens]	Y	18	2WT8-B	-	-	-	-	-	-	-	-	-
2WT8	A	Q8NEM0	-	-	-	-	-	-	-	-	-	-	-	-	9.2	2.3	82	97	11	MOLECULE: MICROCEPHALIN;	-	-	-	-	-	-	-	-	-	-	-	-	-	IPR001357;IPR022047	Y	MCPH1	9606 [Organism: human] [Scientific Name: Homo sapiens]	Y	18	2WT8-B	-	-	-	-	-	-	-	-	-
2WT8	A	Q8NEM0	-	-	-	-	-	-	-	-	-	-	-	-	9.2	2.3	82	97	11	MOLECULE: MICROCEPHALIN;	-	-	-	-	-	-	-	-	-	-	-	-	-	IPR001357;IPR022047	Y	MCPH1	9606 [Organism: human] [Scientific Name: Homo sapiens]	Y	18	2WT8-B	-	-	-	-	-	-	-	-	-
2WT8	A	Q8NEM0	-	-	-	-	-	-	-	-	-	-	-	-	9.2	2.3	82	97	11	MOLECULE: MICROCEPHALIN;	-	-	-	-	-	-	-	-	-	-	-	-	-	IPR001357;IPR022047	Y	MCPH1	9606 [Organism: human] [Scientific Name: Homo sapiens]	Y	18	2WT8-B	-	-	-	-	-	-	-	-	-
2WT8	A	Q8NEM0	-	-	-	-	-	-	-	-	-	-	-	-	9.2	2.3	82	97	11	MOLECULE: MICROCEPHALIN;	-	-	-	-	-	-	-	-	-	-	-	-	-	IPR001357;IPR022047	Y	MCPH1	9606 [Organism: human] [Scientific Name: Homo sapiens]	Y	18	2WT8-B	-	-	-	-	-	-	-	-	-
2WT8	A	Q8NEM0	-	-	-	-	-	-	-	-	-	-	-	-	9.2	2.3	82	97	11	MOLECULE: MICROCEPHALIN;	-	-	-	-	-	-	-	-	-	-	-	-	-	IPR001357;IPR022047	Y	MCPH1	9606 [Organism: human] [Scientific Name: Homo sapiens]	Y	18	2WT8-B	-	-	-	-	-	-	-	-	-
2WT8	A	Q8NEM0	-	-	-	-	-	-	-	-	-	-	-	-	9.2	2.3	82	97	11	MOLECULE: MICROCEPHALIN;	-	-	-	-	-	-	-	-	-	-	-	-	-	IPR001357;IPR022047	Y	MCPH1	9606 [Organism: human] [Scientific Name: Homo sapiens]	Y	18	2WT8-B	-	-	-	-	-	-	-	-	-
2WT8	A	Q8NEM0	-	-	-	-	-	-	-	-	-	-	-	-	9.2	2.3	82	97	11	MOLECULE: MICROCEPHALIN;	-	-	-	-	-	-	-	-	-	-	-	-	-	IPR001357;IPR022047	Y	MCPH1	9606 [Organism: human] [Scientific Name: Homo sapiens]	Y	18	2WT8-B	-	-	-	-	-	-	-	-	-
2WT8	A	Q8NEM0	-	-	-	-	-	-	-	-	-	-	-	-	9.2	2.3	82	97	11	MOLECULE: MICROCEPHALIN;	-	-	-	-	-	-	-	-	-	-	-	-	-	IPR001357;IPR022047	Y	MCPH1	9606 [Organism: human] [Scientific Name: Homo sapiens]	Y	18	2WT8-B	-	-	-	-	-	-	-	-	-
2WT8	A	Q8NEM0	-	-	-	-	-	-	-	-	-	-	-	-	9.2	2.3	82	97	11	MOLECULE: MICROCEPHALIN;	-	-	-	-	-	-	-	-	-	-	-	-	-	IPR001357;IPR022047	Y	MCPH1	9606 [Organism: human] [Scientific Name: Homo sapiens]	Y	18	2WT8-B	-	-	-	-	-	-	-	-	-
2WT8	A	Q8NEM0	-	-	-	-	-	-	-	-	-	-	-	-	9.2	2.3	82	97	11	MOLECULE: MICROCEPHALIN;	-	-	-	-	-	-	-	-	-	-	-	-	-	IPR001357;IPR022047	Y	MCPH1	9606 [Organism: human] [Scientific Name: Homo sapiens]	Y	18	2WT8-B	-	-	-	-	-	-	-	-	-
2WT8	A	Q8NEM0	-	-	-	-	-	-	-	-	-	-	-	-	9.2	2.3	82	97	11	MOLECULE: MICROCEPHALIN;	-	-	-	-	-	-	-	-	-	-	-	-	-	IPR001357;IPR022047	Y	MCPH1	9606 [Organism: human] [Scientific Name: Homo sapiens]	Y	18	2WT8-B	-	-	-	-	-	-	-	-	-
2WT8	A	Q8NEM0	-	-	-	-	-	-	-	-	-	-	-	-	9.2	2.3	82	97	11	MOLECULE: MICROCEPHALIN;	-	-	-	-	-	-	-	-	-	-	-	-	-	IPR001357;IPR022047	Y	MCPH1	9606 [Organism: human] [Scientific Name: Homo sapiens]	Y	18	2WT8-B	-	-	-	-	-	-	-	-	-
2WT8	A	Q8NEM0	-	-	-	-	-	-	-	-	-	-	-	-	9.2	2.3	82	97	11	MOLECULE: MICROCEPHALIN;	-	-	-	-	-	-	-	-	-	-	-	-	-	IPR001357;IPR022047	Y	MCPH1	9606 [Organism: human] [Scientific Name: Homo sapiens]	Y	18	2WT8-B	-	-	-	-	-	-	-	-	-
2WT8	A	Q8NEM0	-	-	-	-	-	-	-	-	-	-	-	-	9.2	2.3	82	97	11	MOLECULE: MICROCEPHALIN;	-	-	-	-	-	-	-	-	-	-	-	-	-	IPR001357;IPR022047	Y	MCPH1	9606 [Organism: human] [Scientific Name: Homo sapiens]	Y	18	2WT8-B	-	-	-	-	-	-	-	-	-
2WT8	A	Q8NEM0	-	-	-	-	-	-	-	-	-	-	-	-	9.2	2.3	82	97	11	MOLECULE: MICROCEPHALIN;	-	-	-	-	-	-	-	-	-	-	-	-	-	IPR001357;IPR022047	Y	MCPH1	9606 [Organism: human] [Scientific Name: Homo sapiens]	Y	18	2WT8-B	-	-	-	-	-	-	-	-	-
2WT8	A	Q8NEM0	-	-	-	-	-	-	-	-	-	-	-	-	9.2	2.3	82	97	11	MOLECULE: MICROCEPHALIN;	-	-	-	-	-	-	-	-	-	-	-	-	-	IPR001357;IPR022047	Y	MCPH1	9606 [Organism: human] [Scientific Name: Homo sapiens]	Y	18	2WT8-B	-	-	-	-	-	-	-	-	-
2WT8	A	Q8NEM0	-	-	-	-	-	-	-	-	-	-	-	-	9.2	2.3	82	97	11	MOLECULE: MICROCEPHALIN;	-	-	-	-	-	-	-	-	-	-	-	-	-	IPR001357;IPR022047	Y	MCPH1	9606 [Organism: human] [Scientific Name: Homo sapiens]	Y	18	2WT8-B	-	-	-	-	-	-	-	-	-
2WT8	A	Q8NEM0	-	-	-	-	-	-	-	-	-	-	-	-	9.2	2.3	82	97	11	MOLECULE: MICROCEPHALIN;	-	-	-	-	-	-	-	-	-	-	-	-	-	IPR001357;IPR022047	Y	MCPH1	9606 [Organism: human] [Scientific Name: Homo sapiens]	Y	18	2WT8-B	-	-	-	-	-	-	-	-	-
2WT8	A	Q8NEM0	-	-	-	-	-	-	-	-	-	-	-	-	9.2	2.3	82	97	11	MOLECULE: MICROCEPHALIN;	-	-	-	-	-	-	-	-	-	-	-	-	-	IPR001357;IPR022047	Y	MCPH1	9606 [Organism: human] [Scientific Name: Homo sapiens]	Y	18	2WT8-B	-	-	-	-	-	-	-	-	-
2WT8	A	Q8NEM0	-	-	-	-	-	-	-	-	-	-	-	-	9.2	2.3	82	97	11	MOLECULE: MICROCEPHALIN;	-	-	-	-	-	-	-	-	-	-	-	-	-	IPR001357;IPR022047	Y	MCPH1	9606 [Organism: human] [Scientific Name: Homo sapiens]	Y	18	2WT8-B	-	-	-	-	-	-	-	-	-
2WT8	A	Q8NEM0	-	-	-	-	-	-	-	-	-	-	-	-	9.2	2.3	82	97	11	MOLECULE: MICROCEPHALIN;	-	-	-	-	-	-	-	-	-	-	-	-	-	IPR001357;IPR022047	Y	MCPH1	9606 [Organism: human] [Scientific Name: Homo sapiens]	Y	14	3U3Z-A01	-	-	-	-	-	-	-	-	-
2WT8	A	Q8NEM0	-	-	-	-	-	-	-	-	-	-	-	-	9.2	2.3	82	97	11	MOLECULE: MICROCEPHALIN;	-	-	-	-	-	-	-	-	-	-	-	-	-	IPR001357;IPR022047	Y	MCPH1	9606 [Organism: human] [Scientific Name: Homo sapiens]	Y	27	3U3Z-A02	-	-	-	-	-	-	-	-	-
3PA6	C	Q8NEM0	-	-	-	-	-	-	-	-	-	-	-	-	9.2	2.3	82	92	11	MOLECULE: MICROCEPHALIN;	-	-	-	-	-	-	-	-	-	-	-	-	-	IPR001357;IPR022047	Y	MCPH1	9606 [Organism: human] [Scientific Name: Homo sapiens]	Y	18	2WT8-B	-	-	-	-	-	-	-	-	-
3PA6	C	Q8NEM0	-	-	-	-	-	-	-	-	-	-	-	-	9.2	2.3	82	92	11	MOLECULE: MICROCEPHALIN;	-	-	-	-	-	-	-	-	-	-	-	-	-	IPR001357;IPR022047	Y	MCPH1	9606 [Organism: human] [Scientific Name: Homo sapiens]	Y	18	2WT8-B	-	-	-	-	-	-	-	-	-
3PA6	C	Q8NEM0	-	-	-	-	-	-	-	-	-	-	-	-	9.2	2.3	82	92	11	MOLECULE: MICROCEPHALIN;	-	-	-	-	-	-	-	-	-	-	-	-	-	IPR001357;IPR022047	Y	MCPH1	9606 [Organism: human] [Scientific Name: Homo sapiens]	Y	18	2WT8-B	-	-	-	-	-	-	-	-	-
3PA6	C	Q8NEM0	-	-	-	-	-	-	-	-	-	-	-	-	9.2	2.3	82	92	11	MOLECULE: MICROCEPHALIN;	-	-	-	-	-	-	-	-	-	-	-	-	-	IPR001357;IPR022047	Y	MCPH1	9606 [Organism: human] [Scientific Name: Homo sapiens]	Y	18	2WT8-B	-	-	-	-	-	-	-	-	-
3PA6	C	Q8NEM0	-	-	-	-	-	-	-	-	-	-	-	-	9.2	2.3	82	92	11	MOLECULE: MICROCEPHALIN;	-	-	-	-	-	-	-	-	-	-	-	-	-	IPR001357;IPR022047	Y	MCPH1	9606 [Organism: human] [Scientific Name: Homo sapiens]	Y	18	2WT8-B	-	-	-	-	-	-	-	-	-
3PA6	C	Q8NEM0	-	-	-	-	-	-	-	-	-	-	-	-	9.2	2.3	82	92	11	MOLECULE: MICROCEPHALIN;	-	-	-	-	-	-	-	-	-	-	-	-	-	IPR001357;IPR022047	Y	MCPH1	9606 [Organism: human] [Scientific Name: Homo sapiens]	Y	18	2WT8-B	-	-	-	-	-	-	-	-	-
3PA6	C	Q8NEM0	-	-	-	-	-	-	-	-	-	-	-	-	9.2	2.3	82	92	11	MOLECULE: MICROCEPHALIN;	-	-	-	-	-	-	-	-	-	-	-	-	-	IPR001357;IPR022047	Y	MCPH1	9606 [Organism: human] [Scientific Name: Homo sapiens]	Y	18	2WT8-B	-	-	-	-	-	-	-	-	-
3PA6	C	Q8NEM0	-	-	-	-	-	-	-	-	-	-	-	-	9.2	2.3	82	92	11	MOLECULE: MICROCEPHALIN;	-	-	-	-	-	-	-	-	-	-	-	-	-	IPR001357;IPR022047	Y	MCPH1	9606 [Organism: human] [Scientific Name: Homo sapiens]	Y	18	2WT8-B	-	-	-	-	-	-	-	-	-
3PA6	C	Q8NEM0	-	-	-	-	-	-	-	-	-	-	-	-	9.2	2.3	82	92	11	MOLECULE: MICROCEPHALIN;	-	-	-	-	-	-	-	-	-	-	-	-	-	IPR001357;IPR022047	Y	MCPH1	9606 [Organism: human] [Scientific Name: Homo sapiens]	Y	18	2WT8-B	-	-	-	-	-	-	-	-	-
3PA6	C	Q8NEM0	-	-	-	-	-	-	-	-	-	-	-	-	9.2	2.3	82	92	11	MOLECULE: MICROCEPHALIN;	-	-	-	-	-	-	-	-	-	-	-	-	-	IPR001357;IPR022047	Y	MCPH1	9606 [Organism: human] [Scientific Name: Homo sapiens]	Y	18	2WT8-B	-	-	-	-	-	-	-	-	-
3PA6	C	Q8NEM0	-	-	-	-	-	-	-	-	-	-	-	-	9.2	2.3	82	92	11	MOLECULE: MICROCEPHALIN;	-	-	-	-	-	-	-	-	-	-	-	-	-	IPR001357;IPR022047	Y	MCPH1	9606 [Organism: human] [Scientific Name: Homo sapiens]	Y	18	2WT8-B	-	-	-	-	-	-	-	-	-
3PA6	C	Q8NEM0	-	-	-	-	-	-	-	-	-	-	-	-	9.2	2.3	82	92	11	MOLECULE: MICROCEPHALIN;	-	-	-	-	-	-	-	-	-	-	-	-	-	IPR001357;IPR022047	Y	MCPH1	9606 [Organism: human] [Scientific Name: Homo sapiens]	Y	18	2WT8-B	-	-	-	-	-	-	-	-	-
3PA6	C	Q8NEM0	-	-	-	-	-	-	-	-	-	-	-	-	9.2	2.3	82	92	11	MOLECULE: MICROCEPHALIN;	-	-	-	-	-	-	-	-	-	-	-	-	-	IPR001357;IPR022047	Y	MCPH1	9606 [Organism: human] [Scientific Name: Homo sapiens]	Y	18	2WT8-B	-	-	-	-	-	-	-	-	-
3PA6	C	Q8NEM0	-	-	-	-	-	-	-	-	-	-	-	-	9.2	2.3	82	92	11	MOLECULE: MICROCEPHALIN;	-	-	-	-	-	-	-	-	-	-	-	-	-	IPR001357;IPR022047	Y	MCPH1	9606 [Organism: human] [Scientific Name: Homo sapiens]	Y	18	2WT8-B	-	-	-	-	-	-	-	-	-
3PA6	C	Q8NEM0	-	-	-	-	-	-	-	-	-	-	-	-	9.2	2.3	82	92	11	MOLECULE: MICROCEPHALIN;	-	-	-	-	-	-	-	-	-	-	-	-	-	IPR001357;IPR022047	Y	MCPH1	9606 [Organism: human] [Scientific Name: Homo sapiens]	Y	18	2WT8-B	-	-	-	-	-	-	-	-	-
3PA6	C	Q8NEM0	-	-	-	-	-	-	-	-	-	-	-	-	9.2	2.3	82	92	11	MOLECULE: MICROCEPHALIN;	-	-	-	-	-	-	-	-	-	-	-	-	-	IPR001357;IPR022047	Y	MCPH1	9606 [Organism: human] [Scientific Name: Homo sapiens]	Y	18	2WT8-B	-	-	-	-	-	-	-	-	-
3PA6	C	Q8NEM0	-	-	-	-	-	-	-	-	-	-	-	-	9.2	2.3	82	92	11	MOLECULE: MICROCEPHALIN;	-	-	-	-	-	-	-	-	-	-	-	-	-	IPR001357;IPR022047	Y	MCPH1	9606 [Organism: human] [Scientific Name: Homo sapiens]	Y	18	2WT8-B	-	-	-	-	-	-	-	-	-
3PA6	C	Q8NEM0	-	-	-	-	-	-	-	-	-	-	-	-	9.2	2.3	82	92	11	MOLECULE: MICROCEPHALIN;	-	-	-	-	-	-	-	-	-	-	-	-	-	IPR001357;IPR022047	Y	MCPH1	9606 [Organism: human] [Scientific Name: Homo sapiens]	Y	18	2WT8-B	-	-	-	-	-	-	-	-	-
3PA6	C	Q8NEM0	-	-	-	-	-	-	-	-	-	-	-	-	9.2	2.3	82	92	11	MOLECULE: MICROCEPHALIN;	-	-	-	-	-	-	-	-	-	-	-	-	-	IPR001357;IPR022047	Y	MCPH1	9606 [Organism: human] [Scientific Name: Homo sapiens]	Y	18	2WT8-B	-	-	-	-	-	-	-	-	-
3PA6	C	Q8NEM0	-	-	-	-	-	-	-	-	-	-	-	-	9.2	2.3	82	92	11	MOLECULE: MICROCEPHALIN;	-	-	-	-	-	-	-	-	-	-	-	-	-	IPR001357;IPR022047	Y	MCPH1	9606 [Organism: human] [Scientific Name: Homo sapiens]	Y	18	2WT8-B	-	-	-	-	-	-	-	-	-
3PA6	C	Q8NEM0	-	-	-	-	-	-	-	-	-	-	-	-	9.2	2.3	82	92	11	MOLECULE: MICROCEPHALIN;	-	-	-	-	-	-	-	-	-	-	-	-	-	IPR001357;IPR022047	Y	MCPH1	9606 [Organism: human] [Scientific Name: Homo sapiens]	Y	18	2WT8-B	-	-	-	-	-	-	-	-	-
3PA6	C	Q8NEM0	-	-	-	-	-	-	-	-	-	-	-	-	9.2	2.3	82	92	11	MOLECULE: MICROCEPHALIN;	-	-	-	-	-	-	-	-	-	-	-	-	-	IPR001357;IPR022047	Y	MCPH1	9606 [Organism: human] [Scientific Name: Homo sapiens]	Y	18	2WT8-B	-	-	-	-	-	-	-	-	-
3PA6	C	Q8NEM0	-	-	-	-	-	-	-	-	-	-	-	-	9.2	2.3	82	92	11	MOLECULE: MICROCEPHALIN;	-	-	-	-	-	-	-	-	-	-	-	-	-	IPR001357;IPR022047	Y	MCPH1	9606 [Organism: human] [Scientific Name: Homo sapiens]	Y	18	2WT8-B	-	-	-	-	-	-	-	-	-
3PA6	C	Q8NEM0	-	-	-	-	-	-	-	-	-	-	-	-	9.2	2.3	82	92	11	MOLECULE: MICROCEPHALIN;	-	-	-	-	-	-	-	-	-	-	-	-	-	IPR001357;IPR022047	Y	MCPH1	9606 [Organism: human] [Scientific Name: Homo sapiens]	Y	18	2WT8-B	-	-	-	-	-	-	-	-	-
3PA6	C	Q8NEM0	-	-	-	-	-	-	-	-	-	-	-	-	9.2	2.3	82	92	11	MOLECULE: MICROCEPHALIN;	-	-	-	-	-	-	-	-	-	-	-	-	-	IPR001357;IPR022047	Y	MCPH1	9606 [Organism: human] [Scientific Name: Homo sapiens]	Y	18	2WT8-B	-	-	-	-	-	-	-	-	-
3PA6	C	Q8NEM0	-	-	-	-	-	-	-	-	-	-	-	-	9.2	2.3	82	92	11	MOLECULE: MICROCEPHALIN;	-	-	-	-	-	-	-	-	-	-	-	-	-	IPR001357;IPR022047	Y	MCPH1	9606 [Organism: human] [Scientific Name: Homo sapiens]	Y	18	2WT8-B	-	-	-	-	-	-	-	-	-
3PA6	C	Q8NEM0	-	-	-	-	-	-	-	-	-	-	-	-	9.2	2.3	82	92	11	MOLECULE: MICROCEPHALIN;	-	-	-	-	-	-	-	-	-	-	-	-	-	IPR001357;IPR022047	Y	MCPH1	9606 [Organism: human] [Scientific Name: Homo sapiens]	Y	18	2WT8-B	-	-	-	-	-	-	-	-	-
3PA6	C	Q8NEM0	-	-	-	-	-	-	-	-	-	-	-	-	9.2	2.3	82	92	11	MOLECULE: MICROCEPHALIN;	-	-	-	-	-	-	-	-	-	-	-	-	-	IPR001357;IPR022047	Y	MCPH1	9606 [Organism: human] [Scientific Name: Homo sapiens]	Y	18	2WT8-B	-	-	-	-	-	-	-	-	-
3PA6	C	Q8NEM0	-	-	-	-	-	-	-	-	-	-	-	-	9.2	2.3	82	92	11	MOLECULE: MICROCEPHALIN;	-	-	-	-	-	-	-	-	-	-	-	-	-	IPR001357;IPR022047	Y	MCPH1	9606 [Organism: human] [Scientific Name: Homo sapiens]	Y	18	2WT8-B	-	-	-	-	-	-	-	-	-
3PA6	C	Q8NEM0	-	-	-	-	-	-	-	-	-	-	-	-	9.2	2.3	82	92	11	MOLECULE: MICROCEPHALIN;	-	-	-	-	-	-	-	-	-	-	-	-	-	IPR001357;IPR022047	Y	MCPH1	9606 [Organism: human] [Scientific Name: Homo sapiens]	Y	18	2WT8-B	-	-	-	-	-	-	-	-	-
3PA6	C	Q8NEM0	-	-	-	-	-	-	-	-	-	-	-	-	9.2	2.3	82	92	11	MOLECULE: MICROCEPHALIN;	-	-	-	-	-	-	-	-	-	-	-	-	-	IPR001357;IPR022047	Y	MCPH1	9606 [Organism: human] [Scientific Name: Homo sapiens]	Y	14	3U3Z-A01	-	-	-	-	-	-	-	-	-
3PA6	C	Q8NEM0	-	-	-	-	-	-	-	-	-	-	-	-	9.2	2.3	82	92	11	MOLECULE: MICROCEPHALIN;	-	-	-	-	-	-	-	-	-	-	-	-	-	IPR001357;IPR022047	Y	MCPH1	9606 [Organism: human] [Scientific Name: Homo sapiens]	Y	27	3U3Z-A02	-	-	-	-	-	-	-	-	-
2WT8	C	Q8NEM0	-	-	-	-	-	-	-	-	-	-	-	-	9.2	2.2	81	92	11	MOLECULE: MICROCEPHALIN;	-	-	-	-	-	-	-	-	-	-	-	-	-	IPR001357;IPR022047	Y	MCPH1	9606 [Organism: human] [Scientific Name: Homo sapiens]	Y	18	2WT8-B	-	-	-	-	-	-	-	-	-
2WT8	C	Q8NEM0	-	-	-	-	-	-	-	-	-	-	-	-	9.2	2.2	81	92	11	MOLECULE: MICROCEPHALIN;	-	-	-	-	-	-	-	-	-	-	-	-	-	IPR001357;IPR022047	Y	MCPH1	9606 [Organism: human] [Scientific Name: Homo sapiens]	Y	18	2WT8-B	-	-	-	-	-	-	-	-	-
2WT8	C	Q8NEM0	-	-	-	-	-	-	-	-	-	-	-	-	9.2	2.2	81	92	11	MOLECULE: MICROCEPHALIN;	-	-	-	-	-	-	-	-	-	-	-	-	-	IPR001357;IPR022047	Y	MCPH1	9606 [Organism: human] [Scientific Name: Homo sapiens]	Y	18	2WT8-B	-	-	-	-	-	-	-	-	-
2WT8	C	Q8NEM0	-	-	-	-	-	-	-	-	-	-	-	-	9.2	2.2	81	92	11	MOLECULE: MICROCEPHALIN;	-	-	-	-	-	-	-	-	-	-	-	-	-	IPR001357;IPR022047	Y	MCPH1	9606 [Organism: human] [Scientific Name: Homo sapiens]	Y	18	2WT8-B	-	-	-	-	-	-	-	-	-
2WT8	C	Q8NEM0	-	-	-	-	-	-	-	-	-	-	-	-	9.2	2.2	81	92	11	MOLECULE: MICROCEPHALIN;	-	-	-	-	-	-	-	-	-	-	-	-	-	IPR001357;IPR022047	Y	MCPH1	9606 [Organism: human] [Scientific Name: Homo sapiens]	Y	18	2WT8-B	-	-	-	-	-	-	-	-	-
2WT8	C	Q8NEM0	-	-	-	-	-	-	-	-	-	-	-	-	9.2	2.2	81	92	11	MOLECULE: MICROCEPHALIN;	-	-	-	-	-	-	-	-	-	-	-	-	-	IPR001357;IPR022047	Y	MCPH1	9606 [Organism: human] [Scientific Name: Homo sapiens]	Y	18	2WT8-B	-	-	-	-	-	-	-	-	-
2WT8	C	Q8NEM0	-	-	-	-	-	-	-	-	-	-	-	-	9.2	2.2	81	92	11	MOLECULE: MICROCEPHALIN;	-	-	-	-	-	-	-	-	-	-	-	-	-	IPR001357;IPR022047	Y	MCPH1	9606 [Organism: human] [Scientific Name: Homo sapiens]	Y	18	2WT8-B	-	-	-	-	-	-	-	-	-
2WT8	C	Q8NEM0	-	-	-	-	-	-	-	-	-	-	-	-	9.2	2.2	81	92	11	MOLECULE: MICROCEPHALIN;	-	-	-	-	-	-	-	-	-	-	-	-	-	IPR001357;IPR022047	Y	MCPH1	9606 [Organism: human] [Scientific Name: Homo sapiens]	Y	18	2WT8-B	-	-	-	-	-	-	-	-	-
2WT8	C	Q8NEM0	-	-	-	-	-	-	-	-	-	-	-	-	9.2	2.2	81	92	11	MOLECULE: MICROCEPHALIN;	-	-	-	-	-	-	-	-	-	-	-	-	-	IPR001357;IPR022047	Y	MCPH1	9606 [Organism: human] [Scientific Name: Homo sapiens]	Y	18	2WT8-B	-	-	-	-	-	-	-	-	-
2WT8	C	Q8NEM0	-	-	-	-	-	-	-	-	-	-	-	-	9.2	2.2	81	92	11	MOLECULE: MICROCEPHALIN;	-	-	-	-	-	-	-	-	-	-	-	-	-	IPR001357;IPR022047	Y	MCPH1	9606 [Organism: human] [Scientific Name: Homo sapiens]	Y	18	2WT8-B	-	-	-	-	-	-	-	-	-
2WT8	C	Q8NEM0	-	-	-	-	-	-	-	-	-	-	-	-	9.2	2.2	81	92	11	MOLECULE: MICROCEPHALIN;	-	-	-	-	-	-	-	-	-	-	-	-	-	IPR001357;IPR022047	Y	MCPH1	9606 [Organism: human] [Scientific Name: Homo sapiens]	Y	18	2WT8-B	-	-	-	-	-	-	-	-	-
2WT8	C	Q8NEM0	-	-	-	-	-	-	-	-	-	-	-	-	9.2	2.2	81	92	11	MOLECULE: MICROCEPHALIN;	-	-	-	-	-	-	-	-	-	-	-	-	-	IPR001357;IPR022047	Y	MCPH1	9606 [Organism: human] [Scientific Name: Homo sapiens]	Y	18	2WT8-B	-	-	-	-	-	-	-	-	-
2WT8	C	Q8NEM0	-	-	-	-	-	-	-	-	-	-	-	-	9.2	2.2	81	92	11	MOLECULE: MICROCEPHALIN;	-	-	-	-	-	-	-	-	-	-	-	-	-	IPR001357;IPR022047	Y	MCPH1	9606 [Organism: human] [Scientific Name: Homo sapiens]	Y	18	2WT8-B	-	-	-	-	-	-	-	-	-
2WT8	C	Q8NEM0	-	-	-	-	-	-	-	-	-	-	-	-	9.2	2.2	81	92	11	MOLECULE: MICROCEPHALIN;	-	-	-	-	-	-	-	-	-	-	-	-	-	IPR001357;IPR022047	Y	MCPH1	9606 [Organism: human] [Scientific Name: Homo sapiens]	Y	18	2WT8-B	-	-	-	-	-	-	-	-	-
2WT8	C	Q8NEM0	-	-	-	-	-	-	-	-	-	-	-	-	9.2	2.2	81	92	11	MOLECULE: MICROCEPHALIN;	-	-	-	-	-	-	-	-	-	-	-	-	-	IPR001357;IPR022047	Y	MCPH1	9606 [Organism: human] [Scientific Name: Homo sapiens]	Y	18	2WT8-B	-	-	-	-	-	-	-	-	-
2WT8	C	Q8NEM0	-	-	-	-	-	-	-	-	-	-	-	-	9.2	2.2	81	92	11	MOLECULE: MICROCEPHALIN;	-	-	-	-	-	-	-	-	-	-	-	-	-	IPR001357;IPR022047	Y	MCPH1	9606 [Organism: human] [Scientific Name: Homo sapiens]	Y	18	2WT8-B	-	-	-	-	-	-	-	-	-
2WT8	C	Q8NEM0	-	-	-	-	-	-	-	-	-	-	-	-	9.2	2.2	81	92	11	MOLECULE: MICROCEPHALIN;	-	-	-	-	-	-	-	-	-	-	-	-	-	IPR001357;IPR022047	Y	MCPH1	9606 [Organism: human] [Scientific Name: Homo sapiens]	Y	18	2WT8-B	-	-	-	-	-	-	-	-	-
2WT8	C	Q8NEM0	-	-	-	-	-	-	-	-	-	-	-	-	9.2	2.2	81	92	11	MOLECULE: MICROCEPHALIN;	-	-	-	-	-	-	-	-	-	-	-	-	-	IPR001357;IPR022047	Y	MCPH1	9606 [Organism: human] [Scientific Name: Homo sapiens]	Y	18	2WT8-B	-	-	-	-	-	-	-	-	-
2WT8	C	Q8NEM0	-	-	-	-	-	-	-	-	-	-	-	-	9.2	2.2	81	92	11	MOLECULE: MICROCEPHALIN;	-	-	-	-	-	-	-	-	-	-	-	-	-	IPR001357;IPR022047	Y	MCPH1	9606 [Organism: human] [Scientific Name: Homo sapiens]	Y	18	2WT8-B	-	-	-	-	-	-	-	-	-
2WT8	C	Q8NEM0	-	-	-	-	-	-	-	-	-	-	-	-	9.2	2.2	81	92	11	MOLECULE: MICROCEPHALIN;	-	-	-	-	-	-	-	-	-	-	-	-	-	IPR001357;IPR022047	Y	MCPH1	9606 [Organism: human] [Scientific Name: Homo sapiens]	Y	18	2WT8-B	-	-	-	-	-	-	-	-	-
2WT8	C	Q8NEM0	-	-	-	-	-	-	-	-	-	-	-	-	9.2	2.2	81	92	11	MOLECULE: MICROCEPHALIN;	-	-	-	-	-	-	-	-	-	-	-	-	-	IPR001357;IPR022047	Y	MCPH1	9606 [Organism: human] [Scientific Name: Homo sapiens]	Y	18	2WT8-B	-	-	-	-	-	-	-	-	-
2WT8	C	Q8NEM0	-	-	-	-	-	-	-	-	-	-	-	-	9.2	2.2	81	92	11	MOLECULE: MICROCEPHALIN;	-	-	-	-	-	-	-	-	-	-	-	-	-	IPR001357;IPR022047	Y	MCPH1	9606 [Organism: human] [Scientific Name: Homo sapiens]	Y	18	2WT8-B	-	-	-	-	-	-	-	-	-
2WT8	C	Q8NEM0	-	-	-	-	-	-	-	-	-	-	-	-	9.2	2.2	81	92	11	MOLECULE: MICROCEPHALIN;	-	-	-	-	-	-	-	-	-	-	-	-	-	IPR001357;IPR022047	Y	MCPH1	9606 [Organism: human] [Scientific Name: Homo sapiens]	Y	18	2WT8-B	-	-	-	-	-	-	-	-	-
2WT8	C	Q8NEM0	-	-	-	-	-	-	-	-	-	-	-	-	9.2	2.2	81	92	11	MOLECULE: MICROCEPHALIN;	-	-	-	-	-	-	-	-	-	-	-	-	-	IPR001357;IPR022047	Y	MCPH1	9606 [Organism: human] [Scientific Name: Homo sapiens]	Y	18	2WT8-B	-	-	-	-	-	-	-	-	-
2WT8	C	Q8NEM0	-	-	-	-	-	-	-	-	-	-	-	-	9.2	2.2	81	92	11	MOLECULE: MICROCEPHALIN;	-	-	-	-	-	-	-	-	-	-	-	-	-	IPR001357;IPR022047	Y	MCPH1	9606 [Organism: human] [Scientific Name: Homo sapiens]	Y	18	2WT8-B	-	-	-	-	-	-	-	-	-
[truncated: 270 more rows]
[truncated: 50 more columns]
