# Supplementary material for: Identification of Novel Interaction Partners of Ets-1: Focus on DNA Repair
Source: Genes (Basel). 2019 Mar 8;10(3):206. doi: 10.3390/genes10030206 (PMC6470857; doi:10.3390/genes10030206)
Supplement: Supplementary file 1 [file genes-10-00206-s001.zip › Supplementary_Table_S4_KU70_SAP_homologs.xlsx]

## Sheet: results_KU70_SAP__all_BLASTs_in
PDB	chain	uniprot	subject ids	% identity	% positives	alignment length	mismatches	gap opens	q. start	q. end	s. start	s. end	evalue	bit score	Z	rmsd	lali	nres	%id	PDB Description	refseq+version	refseq	% identity	% positives	alignment length	mismatches	gap opens	q. start	q. end	s. start	s. end	evalue	bit score	interpro	contains_IPR003034	gene_symbol	taxon_ID	filter	group ID	structure	Rank_CATH	K-Score_CATH	G-Score_CATH	J-Score_CATH	H-Score_CATH	T-Score_CATH	RMSD_CATH	N/*_CATH	P/$_CATH
3RZX	B	P12956	gi|342351124|pdb|3RZX|B	100	100	22	0	0	2	23	1	22	4e-08	46.2	-	-	-	-	-	-	NP_001275905.1	NP_001275905	100	100	74	0	0	1	74	536	609	6e-42	152	IPR006164;IPR027388;IPR005161;IPR005160;IPR002035;IPR006165;IPR003034;IPR016194	Y	XRCC6	9606 [Organism: human] [Scientific Name: Homo sapiens]	Y	1	1JJR-A	-	-	-	-	-	-	-	-	-
3RZX	B	P12956	gi|342351124|pdb|3RZX|B	100	100	22	0	0	2	23	1	22	4e-08	46.2	-	-	-	-	-	-	NP_001460.1	NP_001460	100	100	74	0	0	1	74	536	609	6e-42	152	IPR006164;IPR027388;IPR005161;IPR005160;IPR002035;IPR006165;IPR003034;IPR016194	Y	XRCC6	9606 [Organism: human] [Scientific Name: Homo sapiens]	Y	1	1JJR-A	-	-	-	-	-	-	-	-	-
3RZX	B	P12956	gi|342351124|pdb|3RZX|B	100	100	22	0	0	2	23	1	22	4e-08	46.2	-	-	-	-	-	-	NP_001460.1	NP_001460	100	100	74	0	0	1	74	536	609	6e-42	152	IPR006164;IPR027388;IPR005161;IPR005160;IPR002035;IPR006165;IPR003034;IPR016194	Y	XRCC6	9606 [Organism: human] [Scientific Name: Homo sapiens]	Y	1	1JJR-A	-	-	-	-	-	-	-	-	-
1JEQ	A	P12956	-	-	-	-	-	-	-	-	-	-	-	-	8.8	0.8	51	548	100	MOLECULE: KU70;	NP_001275905.1	NP_001275905	100	100	74	0	0	1	74	536	609	6e-42	152	IPR006164;IPR027388;IPR005161;IPR005160;IPR002035;IPR006165;IPR003034;IPR016194	Y	XRCC6	9606 [Organism: human] [Scientific Name: Homo sapiens]	Y	1	1JJR-A	1	35.13	44.81	0.6693	0.8538	0.8884	1.03	51	50
1JEQ	A	P12956	-	-	-	-	-	-	-	-	-	-	-	-	8.8	0.8	51	548	100	MOLECULE: KU70;	NP_001460.1	NP_001460	100	100	74	0	0	1	74	536	609	6e-42	152	IPR006164;IPR027388;IPR005161;IPR005160;IPR002035;IPR006165;IPR003034;IPR016194	Y	XRCC6	9606 [Organism: human] [Scientific Name: Homo sapiens]	Y	1	1JJR-A	1	35.13	44.81	0.6693	0.8538	0.8884	1.03	51	50
1JEQ	A	P12956	-	-	-	-	-	-	-	-	-	-	-	-	8.8	0.8	51	548	100	MOLECULE: KU70;	NP_001460.1	NP_001460	100	100	74	0	0	1	74	536	609	6e-42	152	IPR006164;IPR027388;IPR005161;IPR005160;IPR002035;IPR006165;IPR003034;IPR016194	Y	XRCC6	9606 [Organism: human] [Scientific Name: Homo sapiens]	Y	1	1JJR-A	1	35.13	44.81	0.6693	0.8538	0.8884	1.03	51	50
1JJR	A	P12956	-	-	-	-	-	-	-	-	-	-	-	-	6.8	1.6	52	54	100	MOLECULE: THYROID AUTOANTIGEN;	NP_001275905.1	NP_001275905	100	100	74	0	0	1	74	536	609	6e-42	152	IPR006164;IPR027388;IPR005161;IPR005160;IPR002035;IPR006165;IPR003034;IPR016194	Y	XRCC6	9606 [Organism: human] [Scientific Name: Homo sapiens]	Y	1	1JJR-A	-	-	-	-	-	-	-	-	-
1JJR	A	P12956	-	-	-	-	-	-	-	-	-	-	-	-	6.8	1.6	52	54	100	MOLECULE: THYROID AUTOANTIGEN;	NP_001460.1	NP_001460	100	100	74	0	0	1	74	536	609	6e-42	152	IPR006164;IPR027388;IPR005161;IPR005160;IPR002035;IPR006165;IPR003034;IPR016194	Y	XRCC6	9606 [Organism: human] [Scientific Name: Homo sapiens]	Y	1	1JJR-A	-	-	-	-	-	-	-	-	-
1JJR	A	P12956	-	-	-	-	-	-	-	-	-	-	-	-	6.8	1.6	52	54	100	MOLECULE: THYROID AUTOANTIGEN;	NP_001460.1	NP_001460	100	100	74	0	0	1	74	536	609	6e-42	152	IPR006164;IPR027388;IPR005161;IPR005160;IPR002035;IPR006165;IPR003034;IPR016194	Y	XRCC6	9606 [Organism: human] [Scientific Name: Homo sapiens]	Y	1	1JJR-A	-	-	-	-	-	-	-	-	-
1V66	A	O75925	-	-	-	-	-	-	-	-	-	-	-	-	3.7	1.8	43	65	16	MOLECULE: PROTEIN INHIBITOR OF ACTIVATED STAT PROTEIN 1;	-	-	-	-	-	-	-	-	-	-	-	-	-	IPR023321;IPR027227;IPR003034;IPR004181	Y	PIAS1	9606 [Organism: human] [Scientific Name: Homo sapiens]	Y	6	1V66-A00	6	26.48	31.5	0.447	0.5316	0.6209	1.94	43	45
1ZBU	B	Q8IV48	-	-	-	-	-	-	-	-	-	-	-	-	4.1	2.7	51	304	10	MOLECULE: 3'-5' EXONUCLEASE ERI1;	-	-	-	-	-	-	-	-	-	-	-	-	-	IPR003034;IPR006055;IPR012337;IPR013520	Y	ERI1	9606 [Organism: human] [Scientific Name: Homo sapiens]	Y	0	1ZBU-B	-	-	-	-	-	-	-	-	-
2KVU	A	Q969V6	-	-	-	-	-	-	-	-	-	-	-	-	4.7	3.2	56	75	18	MOLECULE: MKL/MYOCARDIN-LIKE PROTEIN 1;	-	-	-	-	-	-	-	-	-	-	-	-	-	IPR004018;IPR003034	Y	MKL1	9606 [Organism: human] [Scientific Name: Homo sapiens]	Y	5	2KVU-A00	5	25.56	33.91	0.4016	0.5328	0.6755	2.01	47	53
2KVU	A	Q969V6	-	-	-	-	-	-	-	-	-	-	-	-	4.7	3.2	56	75	18	MOLECULE: MKL/MYOCARDIN-LIKE PROTEIN 1;	-	-	-	-	-	-	-	-	-	-	-	-	-	IPR004018;IPR003034	Y	MKL1	9606 [Organism: human] [Scientific Name: Homo sapiens]	Y	5	2KVU-A00	5	25.56	33.91	0.4016	0.5328	0.6755	2.01	47	53
2KVU	A	Q969V6	-	-	-	-	-	-	-	-	-	-	-	-	4.7	3.2	56	75	18	MOLECULE: MKL/MYOCARDIN-LIKE PROTEIN 1;	-	-	-	-	-	-	-	-	-	-	-	-	-	IPR004018;IPR003034	Y	MKL1	9606 [Organism: human] [Scientific Name: Homo sapiens]	Y	5	2KVU-A00	5	25.56	33.91	0.4016	0.5328	0.6755	2.01	47	53
2KVU	A	Q969V6	-	-	-	-	-	-	-	-	-	-	-	-	4.7	3.2	56	75	18	MOLECULE: MKL/MYOCARDIN-LIKE PROTEIN 1;	-	-	-	-	-	-	-	-	-	-	-	-	-	IPR004018;IPR003034	Y	MKL1	9606 [Organism: human] [Scientific Name: Homo sapiens]	Y	5	2KVU-A00	5	25.56	33.91	0.4016	0.5328	0.6755	2.01	47	53
2KW9	A	Q969V6	-	-	-	-	-	-	-	-	-	-	-	-	3.2	1.9	43	75	26	MOLECULE: MKL/MYOCARDIN-LIKE PROTEIN 1;	-	-	-	-	-	-	-	-	-	-	-	-	-	IPR004018;IPR003034	Y	MKL1	9606 [Organism: human] [Scientific Name: Homo sapiens]	Y	5	2KVU-A00	-	-	-	-	-	-	-	-	-
2KW9	A	Q969V6	-	-	-	-	-	-	-	-	-	-	-	-	3.2	1.9	43	75	26	MOLECULE: MKL/MYOCARDIN-LIKE PROTEIN 1;	-	-	-	-	-	-	-	-	-	-	-	-	-	IPR004018;IPR003034	Y	MKL1	9606 [Organism: human] [Scientific Name: Homo sapiens]	Y	5	2KVU-A00	-	-	-	-	-	-	-	-	-
2KW9	A	Q969V6	-	-	-	-	-	-	-	-	-	-	-	-	3.2	1.9	43	75	26	MOLECULE: MKL/MYOCARDIN-LIKE PROTEIN 1;	-	-	-	-	-	-	-	-	-	-	-	-	-	IPR004018;IPR003034	Y	MKL1	9606 [Organism: human] [Scientific Name: Homo sapiens]	Y	5	2KVU-A00	-	-	-	-	-	-	-	-	-
2KW9	A	Q969V6	-	-	-	-	-	-	-	-	-	-	-	-	3.2	1.9	43	75	26	MOLECULE: MKL/MYOCARDIN-LIKE PROTEIN 1;	-	-	-	-	-	-	-	-	-	-	-	-	-	IPR004018;IPR003034	Y	MKL1	9606 [Organism: human] [Scientific Name: Homo sapiens]	Y	5	2KVU-A00	-	-	-	-	-	-	-	-	-
2DO1	A	P82979	-	-	-	-	-	-	-	-	-	-	-	-	4.1	1.5	40	55	30	MOLECULE: NUCLEAR PROTEIN HCC-1;	-	-	-	-	-	-	-	-	-	-	-	-	-	IPR003034	Y	SARNP	9606 [Organism: human] [Scientific Name: Homo sapiens]	Y	13	2DO1-A	-	-	-	-	-	-	-	-	-
1ZRJ	A	Q9BUJ2	-	-	-	-	-	-	-	-	-	-	-	-	4.2	1.5	41	50	27	MOLECULE: E1B-55KDA-ASSOCIATED PROTEIN 5 ISOFORM C;	-	-	-	-	-	-	-	-	-	-	-	-	-	IPR027417;IPR003034;IPR003877;IPR001870;IPR008985;IPR018355	Y	HNRNPUL1	9606 [Organism: human] [Scientific Name: Homo sapiens]	Y	14	1ZRJ-A	-	-	-	-	-	-	-	-	-
1Y02	A	Q8WZ73	-	-	-	-	-	-	-	-	-	-	-	-	3.7	2.9	55	91	13	MOLECULE: FYVE-RING FINGER PROTEIN SAKURA;	-	-	-	-	-	-	-	-	-	-	-	-	-	IPR001841;IPR011011;IPR013083	N	RFFL	9606 [Organism: human] [Scientific Name: Homo sapiens]	Y	7	1Y02-A	-	-	-	-	-	-	-	-	-
1GJJ	A	P42166	-	-	-	-	-	-	-	-	-	-	-	-	2.3	1.8	42	93	17	MOLECULE: LAP2;	-	-	-	-	-	-	-	-	-	-	-	-	-	IPR013146;IPR003887;IPR021623;IPR011015	N	TMPO	9606 [Organism: human] [Scientific Name: Homo sapiens]	Y	4	1H9F-A	19	29	27.75	0.4092	0.3916	0.5738	2.65	44	53
1GJJ	A	P42166	-	-	-	-	-	-	-	-	-	-	-	-	2.3	1.8	42	93	17	MOLECULE: LAP2;	-	-	-	-	-	-	-	-	-	-	-	-	-	IPR013146;IPR003887;IPR021623;IPR011015	N	TMPO	9606 [Organism: human] [Scientific Name: Homo sapiens]	Y	4	1H9F-A	19	29	27.75	0.4092	0.3916	0.5738	2.65	44	53
1H9F	A	P42166	-	-	-	-	-	-	-	-	-	-	-	-	2.3	2.2	42	57	17	MOLECULE: THYMOPOIETIN;	-	-	-	-	-	-	-	-	-	-	-	-	-	IPR013146;IPR003887;IPR021623;IPR011015	N	TMPO	9606 [Organism: human] [Scientific Name: Homo sapiens]	Y	4	1H9F-A	-	-	-	-	-	-	-	-	-
1JEI	A	P50402	-	-	-	-	-	-	-	-	-	-	-	-	2.1	1.9	39	53	10	MOLECULE: EMERIN;	-	-	-	-	-	-	-	-	-	-	-	-	-	IPR011015;IPR003887	N	EMD	9606 [Organism: human] [Scientific Name: Homo sapiens]	Y	10	2ODC-I	-	-	-	-	-	-	-	-	-
1JEI	A	P50402	-	-	-	-	-	-	-	-	-	-	-	-	2.1	1.9	39	53	10	MOLECULE: EMERIN;	-	-	-	-	-	-	-	-	-	-	-	-	-	IPR011015;IPR003887	N	EMD	9606 [Organism: human] [Scientific Name: Homo sapiens]	Y	10	2ODC-I	-	-	-	-	-	-	-	-	-
2DK4	A	Q99633	-	-	-	-	-	-	-	-	-	-	-	-	2.1	2.8	46	76	13	MOLECULE: PRE-MRNA-SPLICING FACTOR 18;	-	-	-	-	-	-	-	-	-	-	-	-	-	IPR014906;IPR003648;IPR004098	N	PRPF18	9606 [Organism: human] [Scientific Name: Homo sapiens]	Y	3	2DK4-A1	-	-	-	-	-	-	-	-	-
2ODC	I	P50402	-	-	-	-	-	-	-	-	-	-	-	-	-	-	-	-	-	-	-	-	-	-	-	-	-	-	-	-	-	-	-	IPR011015; IPR003887	N	EMD	9606 [Organism: human] [Scientific Name: Homo sapiens]	Y	10	2ODC-I	-	-	-	-	-	-	-	-	-
2ODC	I	P50402	-	-	-	-	-	-	-	-	-	-	-	-	-	-	-	-	-	-	-	-	-	-	-	-	-	-	-	-	-	-	-	IPR011015; IPR003887	N	EMD	9606 [Organism: human] [Scientific Name: Homo sapiens]	Y	10	2ODC-I	-	-	-	-	-	-	-	-	-
1Q1V	A	P35659	-	-	-	-	-	-	-	-	-	-	-	-	-	-	-	-	-	-	-	-	-	-	-	-	-	-	-	-	-	-	-	IPR014876; IPR009057; IPR003034	Y	DEK	9606 [Organism: human] [Scientific Name: Homo sapiens]	Y	2	-	-	-	-	-	-	-	-	-	-
-	-	-	-	-	-	-	-	-	-	-	-	-	-	-	-	-	-	-	-	-	NP_001027455.1	NP_001027455	-	-	-	-	-	-	-	-	-	-	-	IPR013146; IPR011015; IPR003887	N	TMPO	9606 [Organism: human] [Scientific Name: Homo sapiens]	Y	4	1H9F-A	-	-	-	-	-	-	-	-	-
-	-	-	-	-	-	-	-	-	-	-	-	-	-	-	-	-	-	-	-	-	NP_001027454.1	NP_001027454	-	-	-	-	-	-	-	-	-	-	-	IPR013146; IPR011015; IPR003887	N	TMPO	9606 [Organism: human] [Scientific Name: Homo sapiens]	Y	4	1H9F-A	-	-	-	-	-	-	-	-	-
-	-	-	-	-	-	-	-	-	-	-	-	-	-	-	-	-	-	-	-	-	NP_001275907.1	NP_001275907	-	-	-	-	-	-	-	-	-	-	-	IPR006165; IPR027388; IPR003034; IPR006164; IPR002035; IPR005160; IPR005161; IPR016194	Y	XRCC6	9606 [Organism: human] [Scientific Name: Homo sapiens]	Y	1	1JJR-A	-	-	-	-	-	-	-	-	-
-	-	-	-	-	-	-	-	-	-	-	-	-	-	-	-	-	-	-	-	-	NP_001275906.1	NP_001275906	-	-	-	-	-	-	-	-	-	-	-	IPR006165; IPR027388; IPR003034; IPR006164; IPR002035; IPR005160; IPR005161; IPR016194	Y	XRCC6	9606 [Organism: human] [Scientific Name: Homo sapiens]	Y	1	1JJR-A	-	-	-	-	-	-	-	-	-
-	-	-	-	-	-	-	-	-	-	-	-	-	-	-	-	-	-	-	-	-	NP_001275907.1	NP_001275907	-	-	-	-	-	-	-	-	-	-	-	IPR006165; IPR027388; IPR003034; IPR006164; IPR002035; IPR005160; IPR005161; IPR016194	Y	XRCC6	9606 [Organism: human] [Scientific Name: Homo sapiens]	Y	1	1JJR-A	-	-	-	-	-	-	-	-	-
-	-	-	-	-	-	-	-	-	-	-	-	-	-	-	-	-	-	-	-	-	NP_001275906.1	NP_001275906	-	-	-	-	-	-	-	-	-	-	-	IPR006165; IPR027388; IPR003034; IPR006164; IPR002035; IPR005160; IPR005161; IPR016194	Y	XRCC6	9606 [Organism: human] [Scientific Name: Homo sapiens]	Y	1	1JJR-A	-	-	-	-	-	-	-	-	-
-	-	-	-	-	-	-	-	-	-	-	-	-	-	-	-	-	-	-	-	-	NP_775298.1	NP_775298	-	-	-	-	-	-	-	-	-	-	-	IPR023321; IPR004181; IPR003034; IPR027228	Y	PIAS2	9606 [Organism: human] [Scientific Name: Homo sapiens]	Y	11	-	-	-	-	-	-	-	-	-	-
-	-	-	-	-	-	-	-	-	-	-	-	-	-	-	-	-	-	-	-	-	NP_004662.2	NP_004662	-	-	-	-	-	-	-	-	-	-	-	IPR023321; IPR004181; IPR003034; IPR027228	Y	PIAS2	9606 [Organism: human] [Scientific Name: Homo sapiens]	Y	11	-	-	-	-	-	-	-	-	-	-
-	-	-	-	-	-	-	-	-	-	-	-	-	-	-	-	-	-	-	-	-	NP_006090.2	NP_006090	-	-	-	-	-	-	-	-	-	-	-	IPR004181; IPR027226; IPR023321; IPR003034	Y	PIAS3	9606 [Organism: human] [Scientific Name: Homo sapiens]	Y	18	-	-	-	-	-	-	-	-	-	-
-	-	-	-	-	-	-	-	-	-	-	-	-	-	-	-	-	-	-	-	-	NP_056981.2	NP_056981	-	-	-	-	-	-	-	-	-	-	-	IPR003034; IPR023321; IPR004181	Y	PIAS4	9606 [Organism: human] [Scientific Name: Homo sapiens]	Y	12	-	-	-	-	-	-	-	-	-	-
-	-	-	-	-	-	-	-	-	-	-	-	-	-	-	-	-	-	-	-	-	NP_001269591.1	NP_001269591	-	-	-	-	-	-	-	-	-	-	-	IPR029992; IPR004018; IPR003034	Y	MKL1	9606 [Organism: human] [Scientific Name: Homo sapiens]	Y	5	2KVU-A00	-	-	-	-	-	-	-	-	-
-	-	-	-	-	-	-	-	-	-	-	-	-	-	-	-	-	-	-	-	-	NP_054767.3	NP_054767	-	-	-	-	-	-	-	-	-	-	-	IPR004018; IPR003034	Y	MKL2	9606 [Organism: human] [Scientific Name: Homo sapiens]	Y	9	-	-	-	-	-	-	-	-	-	-
-	-	-	-	-	-	-	-	-	-	-	-	-	-	-	-	-	-	-	-	-	NP_001139784.1	NP_001139784	-	-	-	-	-	-	-	-	-	-	-	IPR028721; IPR003034; IPR004018	Y	MYOCD	9606 [Organism: human] [Scientific Name: Homo sapiens]	Y	8	-	-	-	-	-	-	-	-	-	-
-	-	-	-	-	-	-	-	-	-	-	-	-	-	-	-	-	-	-	-	-	NP_705832.1	NP_705832	-	-	-	-	-	-	-	-	-	-	-	IPR028721; IPR003034; IPR004018	Y	MYOCD	9606 [Organism: human] [Scientific Name: Homo sapiens]	Y	8	-	-	-	-	-	-	-	-	-	-
-	-	-	-	-	-	-	-	-	-	-	-	-	-	-	-	-	-	-	-	-	NP_001269591.1	NP_001269591	-	-	-	-	-	-	-	-	-	-	-	IPR029992; IPR004018; IPR003034	Y	MKL1	9606 [Organism: human] [Scientific Name: Homo sapiens]	Y	5	2KVU-A00	-	-	-	-	-	-	-	-	-
-	-	-	-	-	-	-	-	-	-	-	-	-	-	-	-	-	-	-	-	-	NP_001139784.1	NP_001139784	-	-	-	-	-	-	-	-	-	-	-	IPR028721; IPR003034; IPR004018	Y	MYOCD	9606 [Organism: human] [Scientific Name: Homo sapiens]	Y	8	-	-	-	-	-	-	-	-	-	-
-	-	-	-	-	-	-	-	-	-	-	-	-	-	-	-	-	-	-	-	-	NP_705832.1	NP_705832	-	-	-	-	-	-	-	-	-	-	-	IPR028721; IPR003034; IPR004018	Y	MYOCD	9606 [Organism: human] [Scientific Name: Homo sapiens]	Y	8	-	-	-	-	-	-	-	-	-	-
-	-	-	-	-	-	-	-	-	-	-	-	-	-	-	-	-	-	-	-	-	NP_054767.3	NP_054767	-	-	-	-	-	-	-	-	-	-	-	IPR004018; IPR003034	Y	MKL2	9606 [Organism: human] [Scientific Name: Homo sapiens]	Y	9	-	-	-	-	-	-	-	-	-	-
-	-	-	-	-	-	-	-	-	-	-	-	-	-	-	-	-	-	-	-	-	NP_002350.1	NP_002350	-	-	-	-	-	-	-	-	-	-	-	IPR008917; IPR004827; IPR028551; IPR004826; IPR024874	N	MAFG	9606 [Organism: human] [Scientific Name: Homo sapiens]	Y	17	-	-	-	-	-	-	-	-	-	-
-	-	-	-	-	-	-	-	-	-	-	-	-	-	-	-	-	-	-	-	-	NP_001073027.1	NP_001073027	-	-	-	-	-	-	-	-	-	-	-	IPR001870; IPR003877; IPR003034; IPR013320; IPR027417	Y	HNRNPUL2	9606 [Organism: human] [Scientific Name: Homo sapiens]	Y	16	-	-	-	-	-	-	-	-	-	-
-	-	-	-	-	-	-	-	-	-	-	-	-	-	-	-	-	-	-	-	-	NP_004492.2	NP_004492	-	-	-	-	-	-	-	-	-	-	-	IPR013320; IPR026745; IPR027417; IPR003034; IPR001870; IPR003877	Y	HNRNPU	9606 [Organism: human] [Scientific Name: Homo sapiens]	Y	15	-	-	-	-	-	-	-	-	-	-
-	-	-	-	-	-	-	-	-	-	-	-	-	-	-	-	-	-	-	-	-	NP_114032.2	NP_114032	-	-	-	-	-	-	-	-	-	-	-	IPR013320; IPR026745; IPR027417; IPR003034; IPR001870; IPR003877	Y	HNRNPU	9606 [Organism: human] [Scientific Name: Homo sapiens]	Y	15	-	-	-	-	-	-	-	-	-	-
[truncated: 50 more columns]
